# Supplementary material for: Photoinduced Remote Functionalisations by Iminyl Radical Promoted C−C and C−H Bond Cleavage Cascades
Source: PubMed Central journal article supplement (PMC5814920; doi:10.1002/anie.201710790), 2017-12-04
Supplement: ANIE-57-744-s001.pdf [file ANIE-57-744-s001.pdf]

Supporting Information

**Photoinduced Remote Functionalizations by Iminyl Radical Promoted  
C–C and C–H Bond Cleavage Cascades**

*Elizabeth M. Dauncey<sup>+</sup>, Sara P. Morcillo<sup>+</sup>, James J. Douglas, Nadeem S. Sheikh, and  
Daniele Leonori\**

anie\_201710790\_sm\_miscellaneous\_information.pdf

## Table of Contents

|          |                                              |           |
|----------|----------------------------------------------|-----------|
| <b>1</b> | <b>General Experimental Details.....</b>     | <b>3</b>  |
| <b>2</b> | <b>Starting Material Synthesis.....</b>      | <b>4</b>  |
| 2.1      | Synthesis of Ketones .....                   | 4         |
| 2.2      | Synthesis of Oximes .....                    | 19        |
| <b>3</b> | <b>Reaction Optimizations .....</b>          | <b>40</b> |
| 3.1      | Cascade Ring-Opening-Fluorination .....      | 40        |
| 3.2      | Cascade Ring-Opening-Chlorination .....      | 42        |
| 3.3      | Cascade Ring Opening-Azidation .....         | 44        |
| 3.4      | Cascade 1,5-H Abstraction-Chlorination ..... | 46        |
| 3.5      | Cascade 1,5-H Abstraction-Fluorination ..... | 48        |
| <b>4</b> | <b>Picture of Reaction Set-Up.....</b>       | <b>52</b> |
| <b>5</b> | <b>Reaction Products.....</b>                | <b>53</b> |
| 5.1      | Cascade Ring-Opening-Fluorination .....      | 53        |
| 5.2      | Cascade Ring-Opening-Chlorination .....      | 62        |
| 5.3      | Cascade Ring Opening-Azidation .....         | 66        |
| 5.4      | Cascade 1,5-H Abstraction-Chlorination ..... | 68        |
| 5.5      | Cascade 1,5-H Abstraction-Fluorination ..... | 73        |
| <b>6</b> | <b>Mechanistic Considerations .....</b>      | <b>80</b> |
| 6.1      | Emission Quenching Experiments .....         | 80        |

|     |                                                                                                                    |     |
|-----|--------------------------------------------------------------------------------------------------------------------|-----|
| 6.2 | Quantum Yield Determination.....                                                                                   | 83  |
| 6.3 | Ring-Opening: DFT Reactivity Scales.....                                                                           | 84  |
| 6.4 | 1,5-H Abstraction: DFT Reactivity Scales.....                                                                      | 85  |
| 6.5 | Role of Ag(I) in the 1,5-H Abstraction Fluorination .....                                                          | 86  |
| 7   | Computational Studies .....                                                                                        | 89  |
| 7.1 | Computational Methods.....                                                                                         | 89  |
| 7.2 | Activation Energy ( $\Delta G^\ddagger$ ) and Reaction Energy ( $\Delta G^\circ$ ) for Ring-opening Reactions .... | 90  |
| 7.3 | Activation Energy ( $\Delta G^\ddagger$ ) and Reaction Energy ( $\Delta G^\circ$ ) for 1,5-H atom Abstraction...   | 128 |
| 7.4 | Bond Dissociation Enthalpies .....                                                                                 | 150 |
| 8   | NMR Spectra .....                                                                                                  | 191 |
| 9   | References.....                                                                                                    | 333 |

## 1 General Experimental Details

All required fine chemicals were used directly without purification unless stated otherwise. All air and moisture sensitive reactions were carried out under nitrogen atmosphere using standard Schlenk manifold technique. THF was distilled from sodium/benzophenone,  $\text{CH}_2\text{Cl}_2$  and was distilled from  $\text{CaH}_2$ ,  $\text{CH}_3\text{CN}$  was distilled from activated 4Å molecular sieves,  $\text{EtN}(i\text{-Pr})_2$  was distilled over KOH.  $^1\text{H}$  and  $^{13}\text{C}$  Nuclear Magnetic Resonance (NMR) spectra were acquired at various field strengths as indicated and were referenced to  $\text{CHCl}_3$  (7.26 and 77.0 ppm for  $^1\text{H}$  and  $^{13}\text{C}$  respectively).  $^1\text{H}$  NMR coupling constants are reported in Hertz and refer to apparent multiplicities and not true coupling constants. Data are reported as follows: chemical shift, integration, multiplicity (s = singlet, br s = broad singlet, d = doublet, t = triplet, q = quartet, qi = quintet, sx = sextet, sp = septet, m = multiplet, dd = doublet of doublets, etc.), proton assignment (determined by 2D NMR experiments: COSY, HSQC and HMBC) where possible. High-resolution mass spectra were obtained using a JEOL JMS-700 spectrometer or a Fissions VG Trio 2000 quadrupole mass spectrometer. Spectra were obtained using electron impact ionization (EI) and chemical ionization (CI) techniques, or positive electrospray (ES). Infra-red spectra were recorded using a JASCO FT/IR 410 spectrometer or using an ATI Mattson Genesis Seris FTIR spectrometer as evaporated films or liquid films. Analytical TLC: aluminum backed plates pre-coated (0.25 mm) with Merck Silica Gel 60 F254. Compounds were visualized by exposure to UV-light or by dipping the plates in permanganate ( $\text{KMnO}_4$ ) stain followed by heating. Flash column chromatography was performed using Merck Silica Gel 60 (40–63  $\mu\text{m}$ ). All mixed solvent eluents are reported as v/v solutions. UV/Vis spectra were obtained using an Agilent 6453 spectrometer and 1 mm High Precision Cell made of quartz from Hellma Analytics.

The LEDs were bought from LEDLightZone.

All the reactions were conducted in CEM 10 mL glass microwave tubes.

## 2 Starting Material Synthesis

### 2.1 Synthesis of Ketones

#### 2,2a,7,7a-Tetrahydro-1*H*-cyclobuta[*a*]inden-1-one (**S1**)

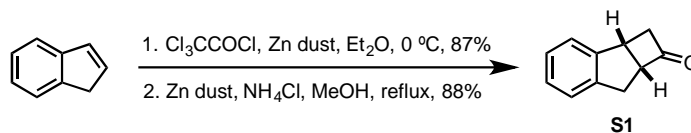

A solution of trichloroacetyl chloride (0.9 mL, 7.8 mmol, 1.5 equiv.) in dry  $\text{Et}_2\text{O}$  (20 mL) was added dropwise under sonication over 45 min. to a solution of indene (0.6 g, 5.2 mmol, 1.0 equiv.) in dry  $\text{Et}_2\text{O}$  (40 mL) containing zinc dust (1.0 g, 15.5 mmol, 3.0 equiv.), at a rate such that the temperature did not exceed  $15\text{--}20\text{ }^\circ\text{C}$ . Sonication was continued for additional 30 min. The mixture was diluted with  $\text{Et}_2\text{O}$  (50 mL) and filtered over a pad of Celite. The filtrate was washed with  $\text{H}_2\text{O}$  (2 x 25 mL),  $\text{Na}_2\text{CO}_3\text{sat}$  (4 x 25 mL), and brine (2 x 25 mL). The organic layer was dried ( $\text{MgSO}_4$ ), filtered, evaporated and purified by column chromatography on silica gel (1.03 g, 87%). The product was solubilised in MeOH (50 mL) and ammonium chloride (1.88 g, 9.2 mmol, 2.0 equiv.) and zinc dust (1.2 g, 18.4 mmol, and 4.0 equiv.) were added. The reaction mixture was heated under reflux overnight. The mixture was cooled to room temperature, diluted with  $\text{CH}_2\text{Cl}_2$  (30 mL) and filtered over Celite. The filtrate was washed with  $\text{H}_2\text{O}$  (2 x 25 mL),  $\text{Na}_2\text{CO}_3\text{sat}$  (4 x 25 mL), and brine (2 x 25 mL). The organic layer was dried ( $\text{MgSO}_4$ ), filtered, evaporated and purified by column chromatography on silica gel eluting with petrol–EtOAc (9:1) to give **S1** as an oil (720 mg, 88%).  $^1\text{H}$  NMR (400 MHz,  $\text{CDCl}_3$ )  $\delta$  7.40–7.32 (1H, m,  $J = 6.7, 2.1$  Hz), 7.32–7.20 (3H, m,  $J = 7.0, 3.1$  Hz), 4.18–4.01 (2H, m), 3.70–3.58 (1H, m), 3.35 (1H, d,  $J = 16.9$  Hz), 3.20–3.06 (1H, m), 2.93 (1H, d,  $J = 17.5$  Hz);  $^{13}\text{C}$  NMR (101 MHz,  $\text{CDCl}_3$ )  $\delta$  212.4, 144.6, 143.1, 127.4, 127.3, 125.4, 125.1, 62.8, 55.7, 36.6, 34.0. Data in accordance with the literature.<sup>[1]</sup>

#### 1,1-Dimethyl-3,4-dihydronaphthalen-2(1*H*)-one (**S2**)

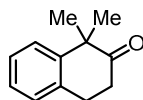

A solution of  $\beta$ -tetralone (400 mg, 2.74 mmol, 1.0 equiv.) in THF (12 mL) was treated with NaH (138 mg, 5.75 mmol, 2.1 equiv., 60% dispersion in mineral oil) and the mixture stirred at room temperature for 10 min. MeI (0.5 mL, 8.22 mmol, 3.0 equiv.) was added and the mixture was heated under reflux for 2 hours. The mixture was cooled to room temperature, diluted with  $\text{NH}_4\text{Cl}_{\text{sat}}$  (10 mL) and extracted with  $\text{Et}_2\text{O}$  (3 x 20 mL). The combined organic layers were dried ( $\text{MgSO}_4$ ), filtered and evaporated. Purification by column chromatography

on silica gel, eluting with petrol–EtOAc (98:2), gave **S2** (270 mg, 57%) as an oil.  $^1\text{H}$  NMR (400 MHz,  $\text{CDCl}_3$ )  $\delta$  7.35 (1H, d,  $J = 7.8$  Hz), 7.30–7.24 (1H, m), 7.23–7.15 (2H, m), 3.11 (2H, t,  $J = 6.9$  Hz), 2.72–2.67 (2H, m), 1.44 (6H, s);  $^{13}\text{C}$  NMR (101 MHz,  $\text{CDCl}_3$ )  $\delta$  214.8, 143.5, 135.2, 128.1, 127.1, 126.4, 126.1, 47.8, 37.2, 28.6, 26.9. Data in accordance with the literature.<sup>[2]</sup>

### 3',4'-Dihydro-2'H-spiro[cyclohexane-1,1'-naphthalen]-2'-one (**S3**)

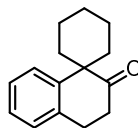

A solution of  $\beta$ -tetralone (400 mg, 2.74 mmol, 1.0 equiv.) in THF (12 mL) was treated with NaH (138 mg, 5.75 mmol, 2.1 equiv., 60% dispersion in mineral oil) and the mixture stirred at room temperature for 10 min. 1,5-Dibromopentane (0.75 mL, 5.48 mmol, 3.0 equiv.) was added and the reaction refluxed at 105 °C for 4 hours. The mixture was cooled to room temperature, diluted with  $\text{NH}_4\text{Cl}_{\text{sat}}$  (10 mL) and extracted with  $\text{Et}_2\text{O}$  (3 x 20 mL). The combined organic layers were dried ( $\text{MgSO}_4$ ), filtered and evaporated. Purification by column chromatography on silica gel, eluting with petrol–EtOAc (98:2), gave **S3** (390 mg, 67%) as a solid.  $^1\text{H}$  NMR (500 MHz,  $\text{CDCl}_3$ )  $\delta$  7.39 (1H, d,  $J = 7.9$  Hz), 7.26–7.23 (1H, m), 7.18 (1H, t,  $J = 7.3$  Hz), 7.13 (1H, d,  $J = 7.4$  Hz), 3.20 (2H, t,  $J = 7.1$  Hz), 2.70 (2H, t,  $J = 7.1$  Hz), 2.18–2.11 (2H, m), 1.79–1.62 (7H, m), 1.38–1.29 (1H, m);  $^{13}\text{C}$  NMR (126 MHz,  $\text{CDCl}_3$ )  $\delta$  214.2, 144.1, 135.8, 128.3, 126.9, 126.4, 126.4, 51.9, 36.4, 34.5, 30.1, 25.8, 23.3. This compound was known in the literature,<sup>[3]</sup> but no spectroscopic data was given.

### 1-(4-Phenyl-1-tosylpiperidin-4-yl)ethan-1-one (**S4**)

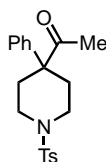

A solution of 1-(4-phenyl-4-piperidiny)-ethanone hydrochloride (500 mg, 1.97 mmol, 1 equiv.) in  $\text{CH}_2\text{Cl}_2$  (5.0 mL) was treated with  $\text{Et}_3\text{N}$  (0.7 mL, 4.33 mmol, 2.2 equiv.) and *p*-TsCl (561 mg, 2.96 mmol, 1.5 equiv.). The reaction mixture was stirred for 2 h and then quenched with  $\text{H}_2\text{O}$  (5.0 mL). The layers were separated and the aqueous layer was extracted with  $\text{CH}_2\text{Cl}_2$  (3 x 30 mL). The combined organic layers were dried ( $\text{MgSO}_4$ ), filtered and evaporated. Purification by column chromatography on silica gel eluting with petrol–EtOAc (9:1), gave **S4** (432 mg, 1.20 mmol, 61%) as a solid. FT-IR  $\nu_{\text{max}}$  (film)/ $\text{cm}^{-1}$  2925, 1702,

1353, 1212, 1092, 934, 724;  $^1\text{H}$  NMR (400 MHz,  $\text{CDCl}_3$ )  $\delta$  7.61 (2H, d,  $J = 7.7$  Hz), 7.38–7.27 (5H, m), 7.21 (2H, d,  $J = 7.8$  Hz), 3.66–3.55 (2H, m), 2.63–2.46 (4H, m), 2.43 (3H, s), 2.15–2.06 (2H, m), 1.81 (3H, s);  $^{13}\text{C}$  NMR (126 MHz,  $\text{CDCl}_3$ )  $\delta$  208.7, 143.7, 140.7, 133.1, 129.8, 129.2, 127.6, 127.55, 126.0, 54.1, 43.7, 32.2, 25.6, 21.6; HRMS (ESI) Found  $\text{MK}^+$  369.1028,  $\text{C}_{20}\text{H}_{23}\text{O}_3\text{NKS}$  requires 396.1030

***tert*-Butyl 4-Acetyl-4-phenylpiperidine-1-carboxylate (S5)**

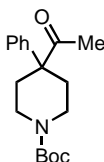

A solution of 1-(4-phenyl-4-piperidinyl)-ethanone hydrochloride (500 mg, 1.97 mmol, 1 equiv.) in  $\text{CH}_2\text{Cl}_2$  (5.0 mL) was treated with  $\text{Et}_3\text{N}$  (0.7 mL, 4.33 mmol, 2.2 equiv.) and  $\text{Boc}_2\text{O}$  (470 mg, 2.17 mmol, 1.1 equiv.) in  $\text{CH}_2\text{Cl}_2$  (5 mL). The reaction mixture was stirred for 2 h and then quenched with  $\text{H}_2\text{O}$  (5.0 mL). The layers were separated and the aqueous layer was extracted with  $\text{CH}_2\text{Cl}_2$  (3 x 30 mL). The combined organic layers were dried ( $\text{MgSO}_4$ ), filtered and evaporated. Purification by column chromatography on silica gel eluting with petrol–EtOAc (9:1), gave **S5** (507 mg, 1.67 mmol, 85%) as an oil.  $^1\text{H}$  NMR (400 MHz,  $\text{CDCl}_3$ )  $\delta$  7.33–7.26 (2H, m), 7.24–7.18 (3H, m), 3.70 (2H, br s), 3.17–3.02 (2H, m), 2.34–2.25 (2H, m), 1.92 (2H, br s), 1.84 (3H, s), 1.37 (9H, s);  $^{13}\text{C}$  NMR (126 MHz,  $\text{CDCl}_3$ )  $\delta$  209.0, 154.8, 141.0, 129.1, 127.4, 126.3, 79.6, 54.8, 41.4, 40.6, 32.8, 32.2, 28.4, 25.6.

**(3*R*,5*S*,8*S*,9*S*,10*S*,13*S*,14*S*)-10-Methyl-17-oxohexadecahydro-1*H*-cyclopenta[*a*]phenanthren-3-yl Acetate (S6)**

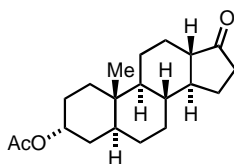

A solution of *trans*-Androsterone (250 mg, 0.86 mmol, 1 equiv.) in  $\text{CH}_2\text{Cl}_2$  (2.0 mL) was cooled to 0 °C, treated with DMAP (10 mg, 0.09 mmol, 0.1 equiv.), pyridine (0.35 mL, 4.30 mmol, 5.0 equiv.) and  $\text{Ac}_2\text{O}$  (0.25 mL, 2.58 mmol, 3.0 equiv.) and allowed to warm to room temperature overnight. The reaction mixture was diluted with  $\text{H}_2\text{O}$  (5 mL) and EtOAc (5 mL) and the layers were separated. The aqueous layer was extracted with EtOAc (3 x 10 mL). The combined organic layers were dried ( $\text{MgSO}_4$ ), filtered and evaporated to give **S6** (200 mg, 0.6 mmol, 70%) as a solid.  $^1\text{H}$  NMR (500 MHz,  $\text{CDCl}_3$ )  $\delta$  4.75–4.62 (1H, m), 2.43 (1H, dd,  $J$

= 19.3, 8.6 Hz), 2.11–2.03 (1H, m), 2.02 (3H, s), 1.98–1.87 (1H, m), 1.84–1.70 (4H, m), 1.68–1.60 (2H, m), 1.56–1.44 (3H, m), 1.42–1.13 (7H, m), 1.08–0.91 (2H, m), 0.85 (3H, d,  $J = 2.3$  Hz), 0.85 (3H, s), 0.71 (1H, td,  $J = 11.6, 4.0$  Hz);  $^{13}\text{C}$  NMR (126 MHz,  $\text{CDCl}_3$ )  $\delta$  221.3, 170.7, 73.5, 54.3, 51.4, 47.8, 44.7, 36.7, 35.9, 35.7, 35.0, 34.0, 31.5, 30.8, 28.3, 27.4, 21.8, 21.5, 20.5, 13.8, 12.2. Data in accordance with the literature.<sup>[4]</sup>

**(2*S*,4*aR*,4*bS*,6*aS*,7*aS*,8*aS*,8*bS*,8*cR*,8*dR*,9*aR*,9*bR*)-9*b*-Hydroxy-4*a*,6*a*-dimethyl-7-oxooctadecahydro-1*H*-cyclopropa[4,5]cyclopenta[1,2-*a*]cyclopropa[1]phenanthren-2-yl Acetate (**S7**)**

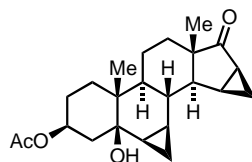

A solution of (2*S*,4*aR*,4*bS*,6*aS*,7*aS*,8*aS*,8*bS*,8*cR*,8*dR*,9*aR*,9*bR*)-2,9*b*-dihydroxy-4*a*,6*a*-dimethyloctadecahydro-7*H*-cyclopropa[4,5]cyclopenta[1,2-*a*]cyclopropa[1]phenanthren-7-one (200 mg, 0.61 mmol) in  $\text{CH}_2\text{Cl}_2$  (1.5 mL) was cooled to 0 °C, treated with DMAP (15 mg, 0.12 mmol, 0.2 equiv.), pyridine (0.5 mL, 6.1 mmol, 10.0 equiv.) and  $\text{Ac}_2\text{O}$  (0.35 mL, 3.64 mmol, 6.0 equiv.) and allowed to warm to room temperature overnight. The reaction was diluted with  $\text{H}_2\text{O}$  (3 mL) and EtOAc (3 mL) the layers were separated. The aqueous layer was extracted with EtOAc (3 x 10 mL). The combined organic layers were dried ( $\text{MgSO}_4$ ), filtered and evaporated to give **S7** (210 mg, 92%) as an off white solid. FT-IR  $\nu_{\text{max}}$  (film)/ $\text{cm}^{-1}$  2936, 1716, 1375, 1249, 908;  $^1\text{H}$  NMR (500 MHz,  $\text{CDCl}_3$ )  $\delta$  5.15–5.11 (1H, m), 2.29 (1H, dd,  $J = 15.4, 3.7$  Hz), 2.21–2.11 (2H, m), 2.09 (3H, s), 2.05–2.00 (1H, m), 1.82–1.74 (2H, m), 1.73–1.62 (5H, m), 1.55–1.42 (3H, m), 1.34–1.28 (2H, m), 1.21–1.15 (1H, m), 1.13–1.07 (1H, m), 0.95 (3H, s), 0.90 (3H, s), 0.88–0.80 (2H, m), 0.74–0.68 (m, 1H);  $^{13}\text{C}$  NMR (126 MHz,  $\text{CDCl}_3$ )  $\delta$  216.2, 169.9, 73.0, 70.5, 52.2, 42.9, 41.4, 40.5, 35.1, 33.5, 31.0, 26.0, 24.6, 22.4, 22.2, 21.5, 21.3, 20.2, 20.2, 18.9, 17.7, 13.8, 11.4; HRMS (ESI) Found  $\text{MNa}^+$  395.2195,  $\text{C}_{23}\text{H}_{32}\text{O}_4\text{Na}$  requires 395.2193.



**Methyl (4*R*,4*aS*,6*aR*,9*S*,11*aR*,11*bS*)-4,9,11*b*-Trimethyl-8-oxotetradecahydro-6*a*,9-methanocyclohepta[*a*]naphthalene-4-carboxylate (**S8**)**

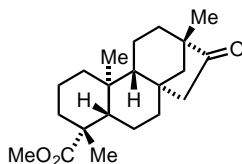

A solution of isosteviol (1.0 g, 3.1 mmol, 1.0 equiv.) in DMF (10 mL) was treated with  $K_2CO_3$  (740 mg, 5.3 mmol, 1.7 equiv.) and MeI (0.35 mL, 5.3 mmol, 1.7 equiv.). The mixture was stirred at room temperature overnight and then diluted with 1M HCl (20 mL) and  $CH_2Cl_2$  (30 mL). The layers were separated and the aqueous layer was extracted with mixture was extracted with  $CH_2Cl_2$  (x 3). The combined organic layers were dried ( $MgSO_4$ ), filtered and evaporated to give **S8** (820 mg, 78%) as a solid.  $^1H$  NMR (400 MHz,  $CDCl_3$ )  $\delta$  3.63 (3H, s), 2.62 (1H, dd,  $J = 18.5, 3.5$  Hz), 2.17 (1H, d,  $J = 13.2$  Hz), 2.05–1.51 (8H, m), 1.51–1.31 (2H, m), 1.18 (3H, s), 1.28–0.85 (5H, m), 0.97 (3H, s), 0.68 (3H, s);  $^{13}C$  NMR (100 MHz,  $CDCl_3$ ):  $\delta$  222.4, 177.8, 57.0, 54.7, 54.3, 51.2, 48.7, 48.5, 48.4, 43.8, 41.5, 39.8, 39.4, 37.9, 37.3, 28.8, 21.7, 20.3, 19.9, 18.9, 13.2. Data in accordance with the literature.<sup>[51]</sup>

## General Procedure for the Synthesis of Ketones S9–22 – GP1

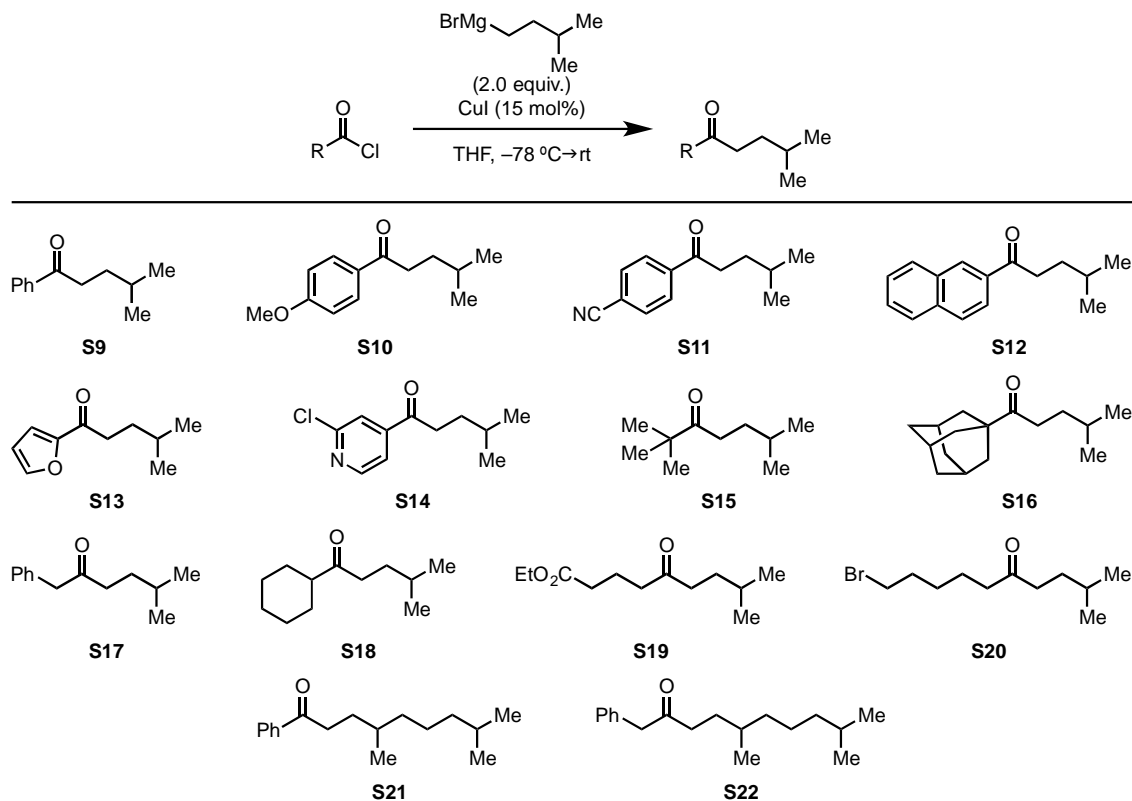

A dry Schlenk tube was charged with CuI (0.15 equiv.), THF (0.1 M) and the acid chloride (1.0 equiv.). The mixture was cooled to  $-78\text{ }^{\circ}\text{C}$  and *i*-pentylmagnesium bromide (1.25 equiv.) was added dropwise. The mixture was warmed to room temperature overnight. The mixture was diluted with NH<sub>4</sub>Cl and EtOAc. The layers were separated and the aqueous layer was extracted with EtOAc (x 3). The combined organic layers were dried (MgSO<sub>4</sub>), filtered and evaporated. The crude was purified by column chromatography on silica gel.

### 4-Methyl-1-phenylpentan-1-one (S9)

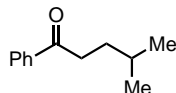

Following **GP1**, benzoyl chloride (0.4 mL, 3.56 mmol) gave **S9** (590 mg, 94%) as an oil. <sup>1</sup>H NMR (400 MHz, CDCl<sub>3</sub>)  $\delta$  7.96 (2H, d,  $J = 7.7$  Hz), 7.55 (1H, t,  $J = 7.3$  Hz), 7.46 (2H, t,  $J = 7.6$  Hz), 3.02–2.91 (2H, m), 1.72–1.56 (3H, m), 0.95 (6H, d,  $J = 6.0$  Hz); <sup>13</sup>C NMR (101 MHz, CDCl<sub>3</sub>)  $\delta$  200.9, 137.2, 133.0, 128.7, 128.2, 36.8, 33.4, 28.0, 22.6. Data in accordance with the literature.<sup>[6]</sup>

### 1-(4-Methoxyphenyl)-4-methylpentan-1-one (S10)

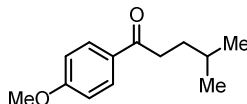

Following **GP1**, 4-methoxybenzoyl chloride (0.65 mL, 2.90 mmol) gave **S10** (413 mg, 69%) as an oil.  $^1\text{H}$  NMR (400 MHz,  $\text{CDCl}_3$ )  $\delta$  7.95 (2H, d,  $J = 8.8$  Hz), 6.94 (2H, t,  $J = 5.8$  Hz), 3.87 (3H, s), 2.90 (2H, dd,  $J = 14.8, 7.4$  Hz), 1.68–1.57 (3H, m), 0.94 (6H, d,  $J = 6.1$  Hz);  $^{13}\text{C}$  NMR (101 MHz,  $\text{CDCl}_3$ ) 198.7, 163.6, 130.2, 113.5, 53.2, 36.4, 33.9, 28.5, 22.3. Data in accordance with the literature.<sup>[7]</sup>

### 4-(4-Methylpentanoyl)benzonitrile (S11)

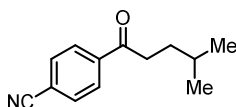

Following **GP1**, 4-cyanobenzoyl chloride (250 mg, 1.50 mmol) gave **S11** (273 mg, 91%) as an oil.  $^1\text{H}$  NMR (400 MHz,  $\text{CDCl}_3$ )  $\delta$  8.06–8.02 (2H, m), 7.79–7.75 (2H, m), 3.02–2.93 (2H, m), 1.66–1.60 (3H, m), 0.96–0.93 (6H, m);  $^{13}\text{C}$  NMR (101 MHz,  $\text{CDCl}_3$ )  $\delta$  199.2, 132.5, 128.5, 126.2, 36.9, 32.8, 27.8, 22.4. Data in accordance with the literature.<sup>[8]</sup>

### 4-Methyl-1-(naphthalen-2-yl)pentan-1-one (S12)

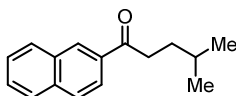

Following **GP1**, 2-naphthoyl chloride (500 mg, 2.60 mmol) gave **S12** (367 mg, 63%) as an oil.  $^1\text{H}$  NMR (400 MHz,  $\text{CDCl}_3$ )  $\delta$  8.48 (1H, s), 8.04 (1H, dd,  $J = 8.6, 1.6$  Hz), 7.98 (1H, d,  $J = 8.0$  Hz), 7.92–7.86 (2H, m), 7.58 (2H, ddd,  $J = 15.0, 13.6, 6.7$  Hz), 3.11 (2H, dd,  $J = 9.5, 5.4$  Hz), 1.75–1.65 (3H, m), 0.98 (6H, d,  $J = 6.1$  Hz);  $^{13}\text{C}$  NMR (101 MHz,  $\text{CDCl}_3$ )  $\delta$  200.8, 135.5, 134.4, 132.6, 129.6, 129.6, 128.4, 128.3, 127.8, 126.7, 124.0, 36.7, 33.4, 27.9, 22.5. This compound was known in literature,<sup>[9]</sup> but no spectroscopic data was provided.

### 1-(Furan-2-yl)-4-methylpentan-1-one (S13)

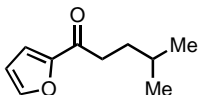

Following **GP1**, furan-2-carbonyl chloride (0.65 mL, 3.83 mmol) gave **S13** (374 mg, 59%) as an oil.  $^1\text{H}$  NMR (400 MHz,  $\text{CDCl}_3$ )  $\delta$  7.57 (1H, dd,  $J = 1.7, 0.7$  Hz), 7.17 (1H, dd,  $J = 3.5, 0.7$

Hz), 6.52 (1H, dd,  $J = 3.5, 1.7$  Hz), 2.84–2.79 (2H, m), 1.67–1.56 (4H, m), 0.95–0.92 (6H, d,  $J = 6.4$  Hz). Data in accordance with the literature.<sup>[10]</sup>

#### 1-(2-Chloropyridin-4-yl)-4-methylpentan-1-one (S14)

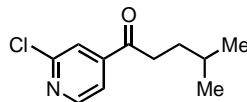

Following **GP1**, 2-chloroisonicotinoyl chloride (200 mg, 1.14 mmol) gave **S14** (120 mg, 50%) as an oil. <sup>1</sup>H NMR (500 MHz, CDCl<sub>3</sub>) δ 8.57 (1H, d,  $J = 5.1$  Hz), 7.75 (1H, d,  $J = 0.5$  Hz), 7.65 (1H, dd,  $J = 5.1, 0.9$  Hz), 2.96–2.91 (2H, m), 1.68–1.59 (3H, m), 0.95 (6H, d,  $J = 6.1$  Hz); <sup>13</sup>C NMR (101 MHz, CDCl<sub>3</sub>) δ 198.4, 152.9, 150.9, 145.8, 122.4, 119.9, 37.1, 32.5, 27.7, 22.3; HRMS (APCI) Found MH<sup>+</sup> 212.0837, C<sub>11</sub>H<sub>15</sub>ONCl requires 212.0837.

#### 2,2,6-Trimethylheptan-3-one (S15)

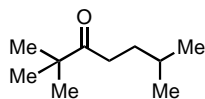

Following **GP1**, pivaloyl chloride (2.4 g, 20 mmol) gave **S15** (2.0 g, 65%) as an oil. <sup>1</sup>H NMR (500 MHz, Chloroform-*d*) δ 2.44 (2H, t), 1.54–1.45 (1H, m), 1.44–1.37 (2H, m), 1.11 (9H, s), 0.86 (6H, d,  $J = 6.6$  Hz); <sup>13</sup>C NMR (126 MHz, CDCl<sub>3</sub>) δ 216.1, 44.2, 34.4, 32.8, 27.7, 26.4, 22.4. This compound was known in the literature,<sup>[11]</sup> but spectroscopic data was not provided.

#### 1-((3*r*,5*r*,7*r*)-Adamantan-1-yl)-4-methylpentan-1-one (S16)

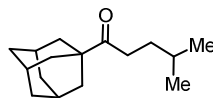

Following **GP1**, (3*r*,5*r*,7*r*)-adamantane-1-carbonyl chloride (250 mg, 1.25 mmol) gave **S16** (230 mg, 78%) as an oil. FT-IR  $\nu_{\max}$  (film)/cm<sup>-1</sup> 2903, 2849, 1697, 1451, 1164, 754; <sup>1</sup>H NMR (400 MHz, CDCl<sub>3</sub>) δ 2.46–2.39 (2H, m), 2.05–2.01 (3H, m), 1.80 (6H, d,  $J = 2.7$  Hz), 1.78–1.65 (6H, m), 1.51 (1H, m), 1.45–1.38 (2H, m), 0.88 (6H, d,  $J = 6.5$  Hz); <sup>13</sup>C NMR (101 MHz, CDCl<sub>3</sub>) δ 216.0, 46.4, 38.3, 36.6, 33.9, 32.6, 28.0, 27.8, 22.5; HRMS (ASAP) Found MH<sup>+</sup> 235.2047, C<sub>16</sub>H<sub>27</sub>O requires 235.2056.

### 5-Methyl-1-phenylhexan-2-one (S17)

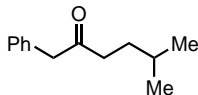

Following **GP1**, phenylacetyl chloride (0.45 mL, 3.23 mmol) gave **S17** (558 mg, 91%) as an oil.  $^1\text{H}$  NMR (400 MHz,  $\text{CDCl}_3$ )  $\delta$  7.35 (2H, t,  $J = 7.4$  Hz), 7.29 (1H, d,  $J = 7.4$  Hz), 7.22 (2H, d,  $J = 7.5$  Hz), 3.71 (2H, s), 2.49–2.44 (2H, m), 1.56–1.40 (3H, m), 0.85 (6H, d,  $J = 6.1$  Hz);  $^{13}\text{C}$  NMR (101 MHz,  $\text{CDCl}_3$ )  $\delta$  208.9, 134.5, 192.9, 128.8, 127.1, 50.3, 40.2, 32.7, 22.7, 22.4. Data in accordance with the literature.<sup>[12]</sup>

### 1-Cyclohexyl-4-methylpentan-1-one (S18)

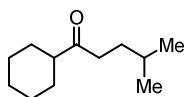

Following **GP1**, cyclohexanecarbonyl chloride (2.1 g, 15 mmol) gave **S19** (2.4 g, 88%) as an oil. FT-IR  $\nu_{\text{max}}$  (film)/ $\text{cm}^{-1}$  2933, 2859, 1717, 1451, 1164, 754;  $^1\text{H}$  NMR (400 MHz,  $\text{CDCl}_3$ )  $\delta$  2.37 (2H, t,  $J = 7.6$  Hz), 2.34–2.24 (1H, m), 1.81–1.68 (2H, m), 1.65–1.58 (1H, m), 1.54–1.35 (4H, m), 1.35–1.00 (6H, m), 0.83 (6H, d,  $J = 7.6$  Hz);  $^{13}\text{C}$  NMR (101 MHz,  $\text{CDCl}_3$ )  $\delta$  214.7, 50.9, 38.8, 32.7, 28.7, 27.9, 26.0, 25.6, 22.5; HRMS (ESI) Found  $\text{MNa}^+$  205.1564  $\text{C}_{12}\text{H}_{22}\text{NaO}$  requires 205.1568.

### Ethyl 8-Methyl-5-oxononanoate (S19)

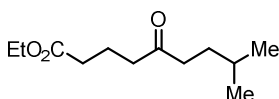

Following **GP1**, ethyl 5-chloro-5-oxopentanoate (500 mg, 2.8 mmol) gave **S19** (469 mg, 78%) as an oil. FT-IR  $\nu_{\text{max}}$  (film)/ $\text{cm}^{-1}$  3340, 2969, 2930, 1466, 1378, 1340, 1160, 1106, 950, 815, 688;  $^1\text{H}$  NMR (400 MHz,  $\text{CDCl}_3$ )  $\delta$  4.12 (2H, q,  $J = 7.1$  Hz), 2.48 (2H, t,  $J = 7.2$  Hz), 2.41–2.36 (2H, m), 2.31 (2H, t,  $J = 7.2$  Hz), 1.92–1.84 (2H, m), 1.58–1.48 (1H, m), 1.49–1.39 (2H, m), 1.25 (3H, t,  $J = 7.1$  Hz), 0.88 (6H, d,  $J = 6.4$  Hz);  $^{13}\text{C}$  NMR (101 MHz,  $\text{CDCl}_3$ )  $\delta$  210.6, 173.2, 60.3, 41.5, 40.9, 33.4, 32.6, 27.7, 22.3, 18.9, 14.2; HRMS (ESI) Found  $\text{MNa}^+$  237.1454,  $\text{C}_{12}\text{H}_{22}\text{O}_3\text{Na}$  requires 237.1461.

### 10-Bromo-2-methyldecan-5-one (S20)

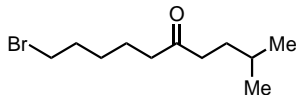

Following **GP1**, 6-bromohexanoyl chloride (450 mg, 2.1 mmol) gave **S20** (430 mg, 82%) as an oil. FT-IR  $\nu_{\max}$  (film)/ $\text{cm}^{-1}$  2953, 2867, 1711, 1464, 1366, 1253, 1169, 755;  $^1\text{H}$  NMR (500 MHz,  $\text{CDCl}_3$ )  $\delta$  3.40 (2H, t,  $J = 6.8$  Hz), 2.47–2.35 (4H, m), 1.92–1.82 (2H, m), 1.64–1.56 (2H, m), 1.55–1.48 (1H, m), 1.48–1.39 (4H, m), 0.89 (6H, d,  $J = 6.5$  Hz);  $^{13}\text{C}$  NMR (126 MHz,  $\text{CDCl}_3$ )  $\delta$  211.2, 42.4, 40.9, 33.6, 32.7, 32.6, 27.8, 27.7, 22.9, 22.3; HRMS (ASAP) Found  $\text{MH}^+$  249.0840,  $\text{C}_{11}\text{H}_{22}\text{BrO}$  requires 249.0849.

### 4,8-Dimethyl-1-phenylnonan-1-one (S21)

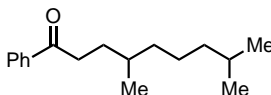

Following **GP1** but using (2,6-dimethylheptyl)magnesium bromide, benzoyl chloride (0.41 mL, 3.5 mmol) gave **S21** (781 mg, 90%) as an oil.<sup>a</sup> HRMS (ASAP) Found  $\text{MH}^+$  247.2047,  $\text{C}_{17}\text{H}_{27}\text{O}$  requires 247.2056.

### 5,9-Dimethyl-1-phenyldecan-2-one (S22)

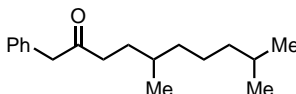

Following **GP1** but using (2,6-dimethylheptyl)magnesium bromide, phenyl acetyl chloride (500 mg, 3.25 mmol) gave **S22** (365 mg, 43%) as an oil. FT-IR  $\nu_{\max}$  (film)/ $\text{cm}^{-1}$  2954, 2926, 2868, 1709, 1454, 1215, 752, 698;  $^1\text{H}$  NMR (400 MHz,  $\text{CDCl}_3$ )  $\delta$  7.33 (2H, t,  $J = 7.3$  Hz), 7.30–7.24 (1H, m), 7.21 (2H, d,  $J = 7.2$  Hz), 3.69 (2H, s), 2.49–2.40 (2H, m), 1.63–1.54 (2H, m), 1.53–1.45 (1H, m), 1.40–1.30 (2H, m), 1.27–1.15 (3H, m), 1.13–1.06 (2H, m), 0.85 (6H, d,  $J = 6.6$  Hz), 0.80 (3H, d,  $J = 6.2$  Hz);  $^{13}\text{C}$  NMR (101 MHz,  $\text{CDCl}_3$ )  $\delta$  209.0, 134.5, 129.5, 128.8, 127.1, 50.3, 39.9, 39.4, 37.1, 32.5, 30.9, 26.6, 24.8, 22.8, 22.7, 19.5; HRMS (ASAP) Found  $\text{MH}^+$  261.2203,  $\text{C}_{18}\text{H}_{29}\text{O}$  requires 261.2213.

<sup>a</sup> In this case **S21** was directly used in the next step without chromatographic purification.

## General Procedure for Synthesis of Ketones S23–26 – GP2

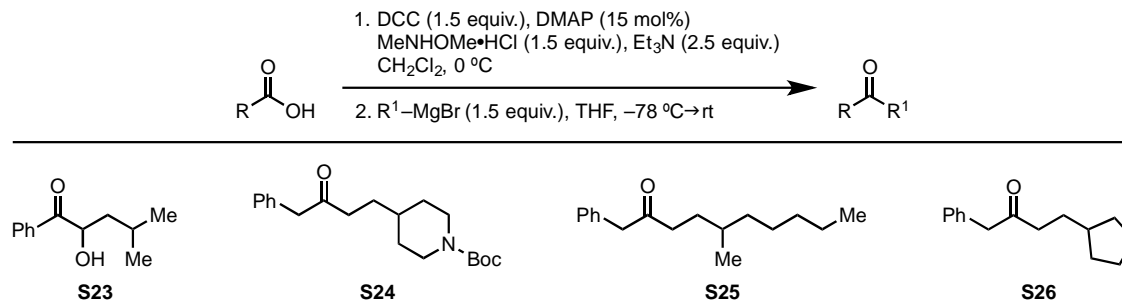

A solution of carboxylic acid (1.0 equiv.) in CH<sub>2</sub>Cl<sub>2</sub> (0.1 M) was cooled to 0 °C and treated with N,O-dimethylhydroxylamine hydrochloride (1.5 equiv.), DCC (1.5 equiv.), DMAP (15 mol%) and Et<sub>3</sub>N (2.5 equiv.). The mixture was stirred overnight at room temperature, filtered through celite and diluted with HCl 0.5 N. The layers were separated and the aqueous layer was extracted with CH<sub>2</sub>Cl<sub>2</sub> (x 3). The combined organic layers were dried (MgSO<sub>4</sub>), filtered and evaporated. The crude was purified by column chromatography on silica gel to give the corresponding Weinreb amides. A solution of the Weinreb amide (1.0 equiv.) in THF (0.1 M) was cooled to -78 °C and treated with the Grignard reagent (1.5 equiv.) by dropwise. The reaction was allowed to warm to room temperature overnight. The mixture was diluted with NH<sub>4</sub>Cl<sub>sat</sub> and EtOAc. The layers were separated and the aqueous layer was extracted with EtOAc (x 3). The combined organic layers were dried (MgSO<sub>4</sub>), filtered and evaporated. The crude was purified by column chromatography on silica gel.

### 3-Hydroxy-5-methyl-1-phenylhexan-2-one (S23)

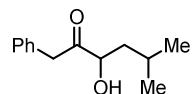

Following **GP2**, 2-hydroxy-4-methylpentanoic acid (500 mg, 3.1 mmol) gave **S23** (175 mg, 57%) as an oil. <sup>1</sup>H NMR (500 MHz, CDCl<sub>3</sub>) δ 7.30–7.20 (3H, m), 7.14 (2H, d, *J* = 7.2 Hz), 4.22 (1H, dd, *J* = 10.2, 2.9 Hz), 3.76 (1H, d, *J* = 15.8 Hz), 3.70 (1H, d, *J* = 15.8 Hz), 1.92–1.82 (1H, m), 1.59–1.47 (1H, m), 1.45–1.30 (1H, m), 0.90 (6H, d, *J* = 6.7 Hz); <sup>13</sup>C NMR (126 MHz, CDCl<sub>3</sub>) δ 210.4, 133.3, 129.6, 128.9, 127.4, 74.9, 44.9, 42.8, 24.9, 23.7, 21.4; HRMS (ESI) Found MNa<sup>+</sup> 229.1212 C<sub>13</sub>H<sub>18</sub>NaO<sub>2</sub> requires 229.1204.

#### ***tert*-Butyl 4-(3-Oxo-4-phenylbutyl)piperidine-1-carboxylate (S24)**

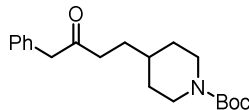

Following **GP2**, 3-(1-(*tert*-butoxycarbonyl)piperidin-4-yl)propanoic acid (230 mg, 0.77 mmol) gave **S24** (150 mg, 59%) as an oil. FT-IR  $\nu_{\max}$  (film)/ $\text{cm}^{-1}$  2253, 1375, 1038, 918, 737, 562, 555, 540;  $^1\text{H}$  NMR (500 MHz,  $\text{CDCl}_3$ )  $\delta$  7.38–7.28 (3H, m), 7.21 (2H, t,  $J = 8.5$  Hz), 4.03 (2H, s), 3.68 (2H, br s), 2.59 (2H, br s), 2.47 (2H, t,  $J = 7.5$  Hz), 1.62–1.42 (7H, m), 1.44 (9H, s);  $^{13}\text{C}$  NMR (126 MHz,  $\text{CDCl}_3$ )  $\delta$  208.2, 155.0, 134.4, 130.5, 129.3, 127.0, 79.1, 60.3, 38.7, 35.2, 29.9, 28.35, 21.0, 14.3; HRMS (ESI) Found  $\text{MNa}^+$  354.2040,  $\text{C}_{20}\text{H}_{29}\text{O}_3\text{NNa}$  requires 354.2040.

#### **5-Methyl-1-phenyldecan-2-one (S25)**

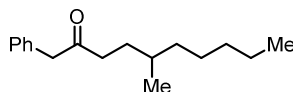

Following **GP2**, 4-methylnonanoic acid (316 mg, 2.0 mmol) gave **S25** (173 mg, 37%) as an oil. FT-IR  $\nu_{\max}$  (film)/ $\text{cm}^{-1}$  2954, 2926, 2868, 1709, 1454, 1215, 752, 698;  $^1\text{H}$  NMR (400 MHz,  $\text{CDCl}_3$ )  $\delta$  7.26–7.21 (2H, m), 7.21–7.15 (1H, m), 7.15–7.11 (2H, m), 3.60 (2H, s), 2.48–2.17 (2H, m), 1.58–1.39 (1H, m), 1.35–0.94 (10H, m), 0.79 (3H, t,  $J = 6.9$  Hz), 0.72 (3H, d,  $J = 6.3$  Hz);  $^{13}\text{C}$  NMR (101 MHz,  $\text{CDCl}_3$ )  $\delta$  208.9, 134.5, 129.5, 128.8, 127.1, 68.1, 50.2, 39.9, 36.5, 32.4, 30.8, 29.3, 23.1, 19.5, 14.2; HRMS (ESI) Found  $\text{MNa}^+$  269.3845,  $\text{C}_{17}\text{H}_{26}\text{NaO}$  requires 269.3838.

#### **4-Cyclopentyl-1-phenylbutan-2-one (S26)**

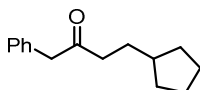

Following **GP2**, 3-cyclopentylpropanoic acid (500 mg, 3.5 mmol) gave **S26** (151 mg, 20%) as an oil. FT-IR  $\nu_{\max}$  (film)/ $\text{cm}^{-1}$  1710, 1417, 1359, 1220, 1091, 902, 702;  $^1\text{H}$  NMR ( $\text{CDCl}_3$ , 400 MHz)  $\delta$  7.26 (2H, d,  $J = 7.5$  Hz), 7.23–7.16 (1H, m), 7.13 (2H, d,  $J = 7.5$  Hz), 3.61 (2H, s), 2.38 (2H, t,  $J = 7.6$  Hz), 1.66–1.55 (3H, m), 1.55–1.44 (4H, m), 1.46–1.35 (2H, m), 0.94 (2H, br s);  $^{13}\text{C}$  NMR ( $\text{CDCl}_3$ , 126 MHz)  $\delta$  209.1, 134.7, 129.8, 129.1, 127.3, 50.5, 41.7, 39.9, 32.8, 30.3, 25.5; HRMS (ESI) Found  $\text{MNa}^+$  239.1406,  $\text{C}_{15}\text{H}_{20}\text{NaO}$  requires 239.1412.



### General Procedure for the Synthesis of Ketones S27–30 – GP3

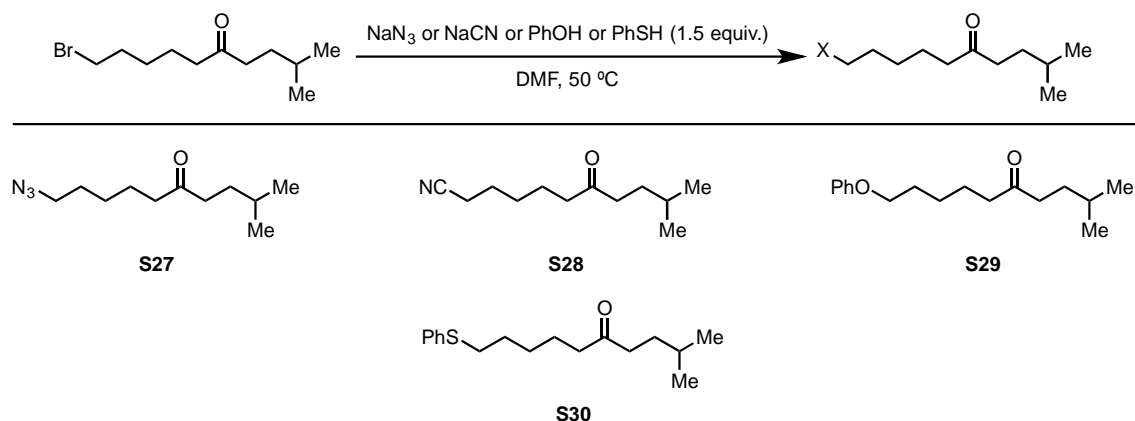

A solution of **S20** (1.0 equiv.) in DMF (0.1M) was treated with the appropriate nucleophile (1.5 equiv.), warmed to 50 °C and stirred at the same temperature overnight. The mixture was diluted with H<sub>2</sub>O (0.1 M) and EtOAc. The layers were separated and the aqueous layer was extracted with EtOAc (x 3). The combined organic layers were dried (MgSO<sub>4</sub>), filtered and evaporated. The crude was purified by column chromatography on silica gel.

#### 10-Azido-2-methyldecan-5-one (S27)

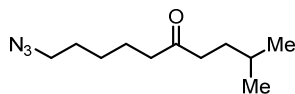

Following **GP3**, **S20** (248 mg, 1.0 mmol) gave **S27** (93 mg, 44%) as an oil. FT-IR  $\nu_{\text{max}}$  (film)/cm<sup>-1</sup> 1749, 1710, 1418, 1359, 1220, 1091; <sup>1</sup>H NMR (400 MHz, CDCl<sub>3</sub>)  $\delta$  3.25 (2H, t,  $J$  = 6.9 Hz), 2.41 (2H, t,  $J$  = 7.5 Hz), 2.37 (2H, d,  $J$  = 7.5 Hz), 1.60–1.54 (4H, m), 1.53–1.25 (5H, m), 0.87 (6H, d,  $J$  = 6.4 Hz); <sup>13</sup>C NMR (101 MHz, CDCl<sub>3</sub>)  $\delta$  211.2, 51.3, 42.5, 41.0, 32.7, 28.8, 27.8, 26.4, 23.3, 22.4; HRMS (ESI) Found MNa<sup>+</sup> 234.1577, C<sub>11</sub>H<sub>21</sub>N<sub>3</sub>NaO requires 234.1582.

#### 10-Methyl-7-oxoundecanenitrile (S28)

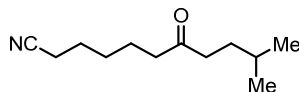

Following **GP3**, **S20** (248 mg, 1.0 mmol) gave **S28** (101 mg, 51%) as an oil. <sup>1</sup>H NMR (500 MHz, CDCl<sub>3</sub>)  $\delta$  2.38 (2H, t,  $J$  = 7.3 Hz), 2.36–2.32 (2H, m), 2.30 (2H, t,  $J$  = 7.1 Hz), 1.62 (2H, m), 1.54 (2H, m), 1.47 (1H, m), 1.43–1.34 (4H, m), 0.83 (6H, d,  $J$  = 6.6 Hz); <sup>13</sup>C NMR (126 MHz, CDCl<sub>3</sub>)  $\delta$  210.6, 119.4, 41.8, 40.6, 32.3, 27.9, 27.4, 25.0, 22.5, 22.1, 16.7; HRMS (ESI) Found MNa<sup>+</sup> 218.1815, C<sub>12</sub>H<sub>21</sub>NNaO requires 218.1521.

### 2-Methyl-10-phenoxydecan-5-one (S29)

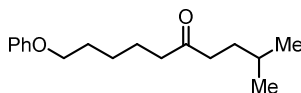

Following **GP3** but adding  $\text{K}_2\text{CO}_3$  (2.0 equiv.), **S20** (200 mg, 0.8 mmol) gave **S29** (208 mg, 99%) as an oil. FT-IR  $\nu_{\text{max}}$  (film)/ $\text{cm}^{-1}$  2959, 2942, 2253, 1715, 1736, 1418, 1291, 1034, 918, 794, 758, 695;  $^1\text{H}$  NMR (400 MHz,  $\text{CDCl}_3$ )  $\delta$  7.42–7.22 (2H, m), 6.99–6.88 (3H, m), 3.98 (2H, t,  $J = 6.4$  Hz), 2.47 (2H, t,  $J = 7.4$  Hz), 2.42 (2H, t,  $J = 7.2$  Hz), 1.82 (2H, q,  $J = 7.1$  Hz), 1.67 (2H, q,  $J = 7.4$  Hz), 1.60–1.43 (5H, m), 0.91 (6H, d,  $J = 6.4$  Hz);  $^{13}\text{C}$  NMR (101 MHz,  $\text{CDCl}_3$ )  $\delta$  211.4, 159.0, 129.4, 120.5, 114.4, 67.5, 42.5, 40.8, 32.6, 29.1, 27.7, 25.7, 23.5, 22.3; HRMS (ESI) Found  $\text{MNa}^+$  285.1859,  $\text{C}_{17}\text{H}_{26}\text{NaO}$  requires 285.1830.

### 2-Methyl-10-(phenylthio)decan-5-one (S30)

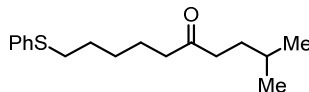

Following **GP3** but adding NaOH (2.0 equiv.), **S20** (200 mg, 0.8 mmol) gave **S30** (160 mg, 72%) as an oil. FT-IR  $\nu_{\text{max}}$  (film)/ $\text{cm}^{-1}$  2956, 1710, 1579, 1438, 1264, 1023, 805, 733, 702, 689;  $^1\text{H}$  NMR (500 MHz,  $\text{CDCl}_3$ )  $\delta$  7.45–7.38 (2H, m), 7.25–7.19 (3H, m), 2.83 (2H, t,  $J = 7.3$  Hz), 2.34–2.20 (4H, m), 1.57 (2H, q,  $J = 7.5$  Hz), 1.50 (2H, q,  $J = 8$  Hz), 1.47–1.40 (1H, m), 1.40–1.28 (4H, m), 0.80 (6H, d,  $J = 6.5$  Hz);  $^{13}\text{C}$  NMR (126 MHz,  $\text{CDCl}_3$ )  $\delta$  211.4, 137.1, 129.2, 127.6, 125.8, 42.6, 41.0, 33.5, 32.8, 29.0, 28.4, 27.8, 23.4, 22.4; HRMS (ESI) Found  $\text{MK}^+$  317.1334,  $\text{C}_{17}\text{H}_{26}\text{KOS}$  requires 317.1341.

**(R)-5-((3R,5R,8R,9S,10S,13R,14S,17R)-3-hydroxy-10,13-dimethylhexadecahydro-1H-cyclopenta[*a*]phenanthren-17-yl)hexan-2-one (S31)**

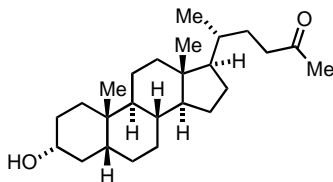

A solution of lithocolic acid (0.5 g, 1.3 mmol, 1.0 equiv.) in THF (15 mL), cooled to 0 °C and treated with MeLi (4.2 mL, 6.5 mmol, 5.0 equiv., 1.6 M in diethyl ether) by dropwise. The reaction mixture was stirred for 8 h at room temperature, and then quenched with TMSCl (6 mL). The crude was diluted with EtOAc (20 mL), washed with HCl 1M (20 mL) and water (20 mL). The organic layer was dried (MgSO<sub>4</sub>), filtered and evaporated. The crude was purified by column chromatography on silica gel, eluting with CH<sub>2</sub>Cl<sub>2</sub>-MeOH (95:5), to give **S31** as an oil (290 mg, 60%). <sup>1</sup>H NMR (400 MHz, CDCl<sub>3</sub>) δ 3.64–3.49 (1H, m), 2.46 – 2.21 (3H, m), 2.09 (3H, s), 1.90 (1H, m), 1.83–1.55 (6H, m), 1.56–1.41 (2H, m), 1.34 (7H, d, *J* = 3.8 Hz), 1.28–1.11 (5H, m), 1.11–0.95 (5H, m), 0.86 (3H, s), 0.84 (3H, d, *J* = 6.5 Hz), 0.58 (3H, s); <sup>13</sup>C NMR (101 MHz, CDCl<sub>3</sub>) δ 209.6, 71.3, 56.2, 55.7, 42.4, 41.8, 40.4, 40.1, 39.9, 36.1, 35.5, 35.1, 345.0, 34.3, 30.2, 29.6, 29.5, 27.91, 26.9, 26.1, 23.9, 23.1, 20.5, 18.1, 11.7. Data in accordance with the literature.<sup>[13]</sup>

## 2.2 Synthesis of Oximes

### General Procedure for the Synthesis of Oximes 1a–u and 6a–w – GP4

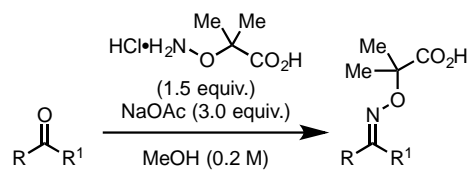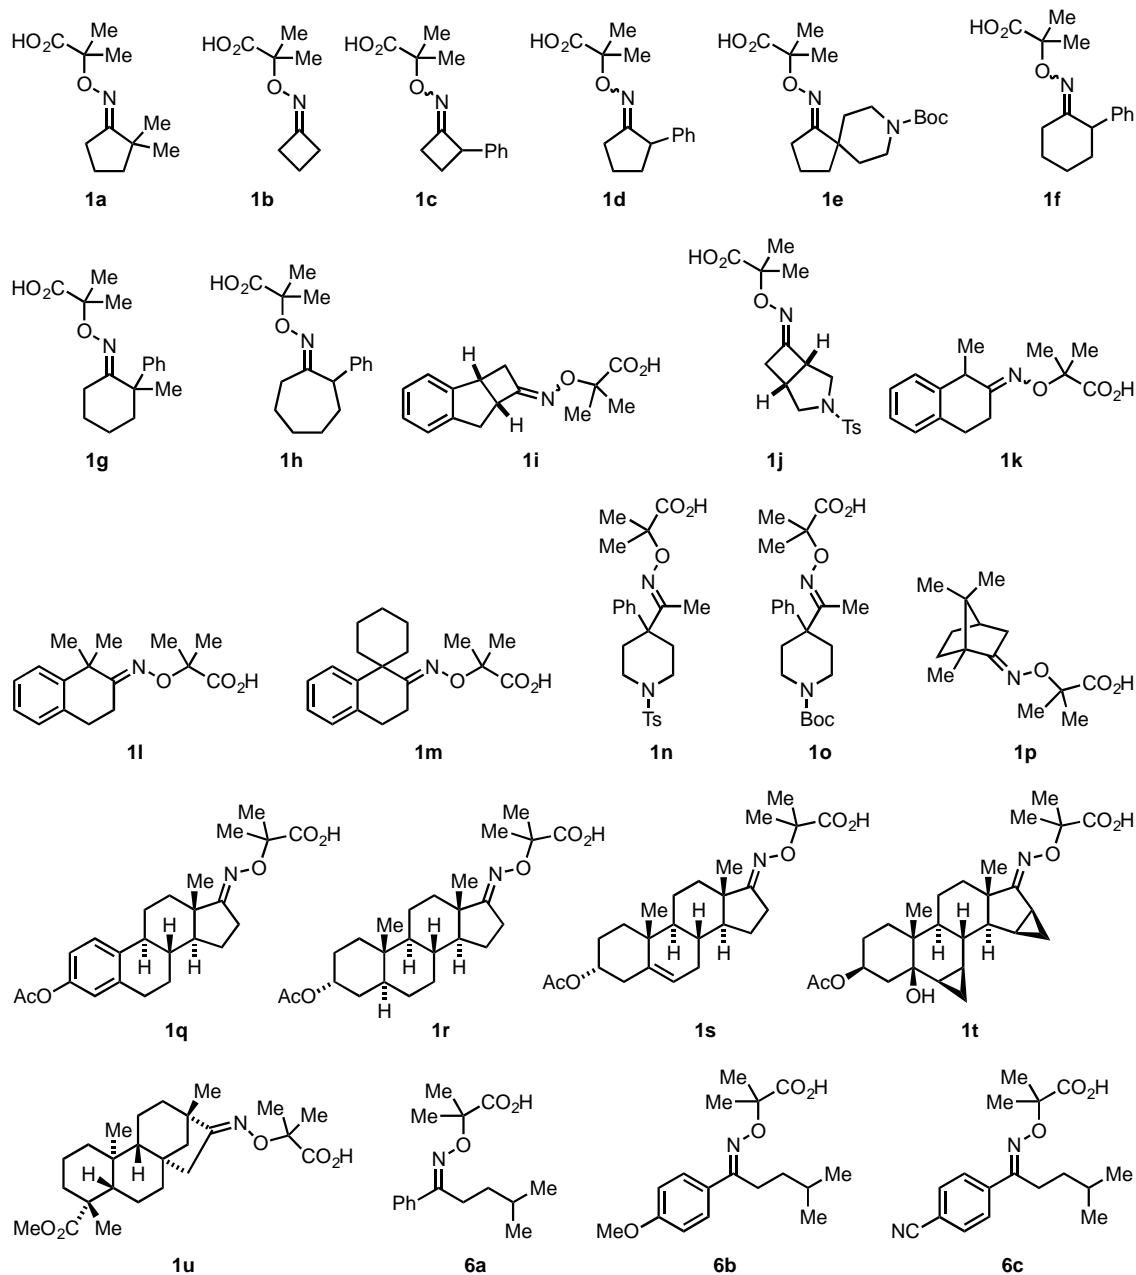

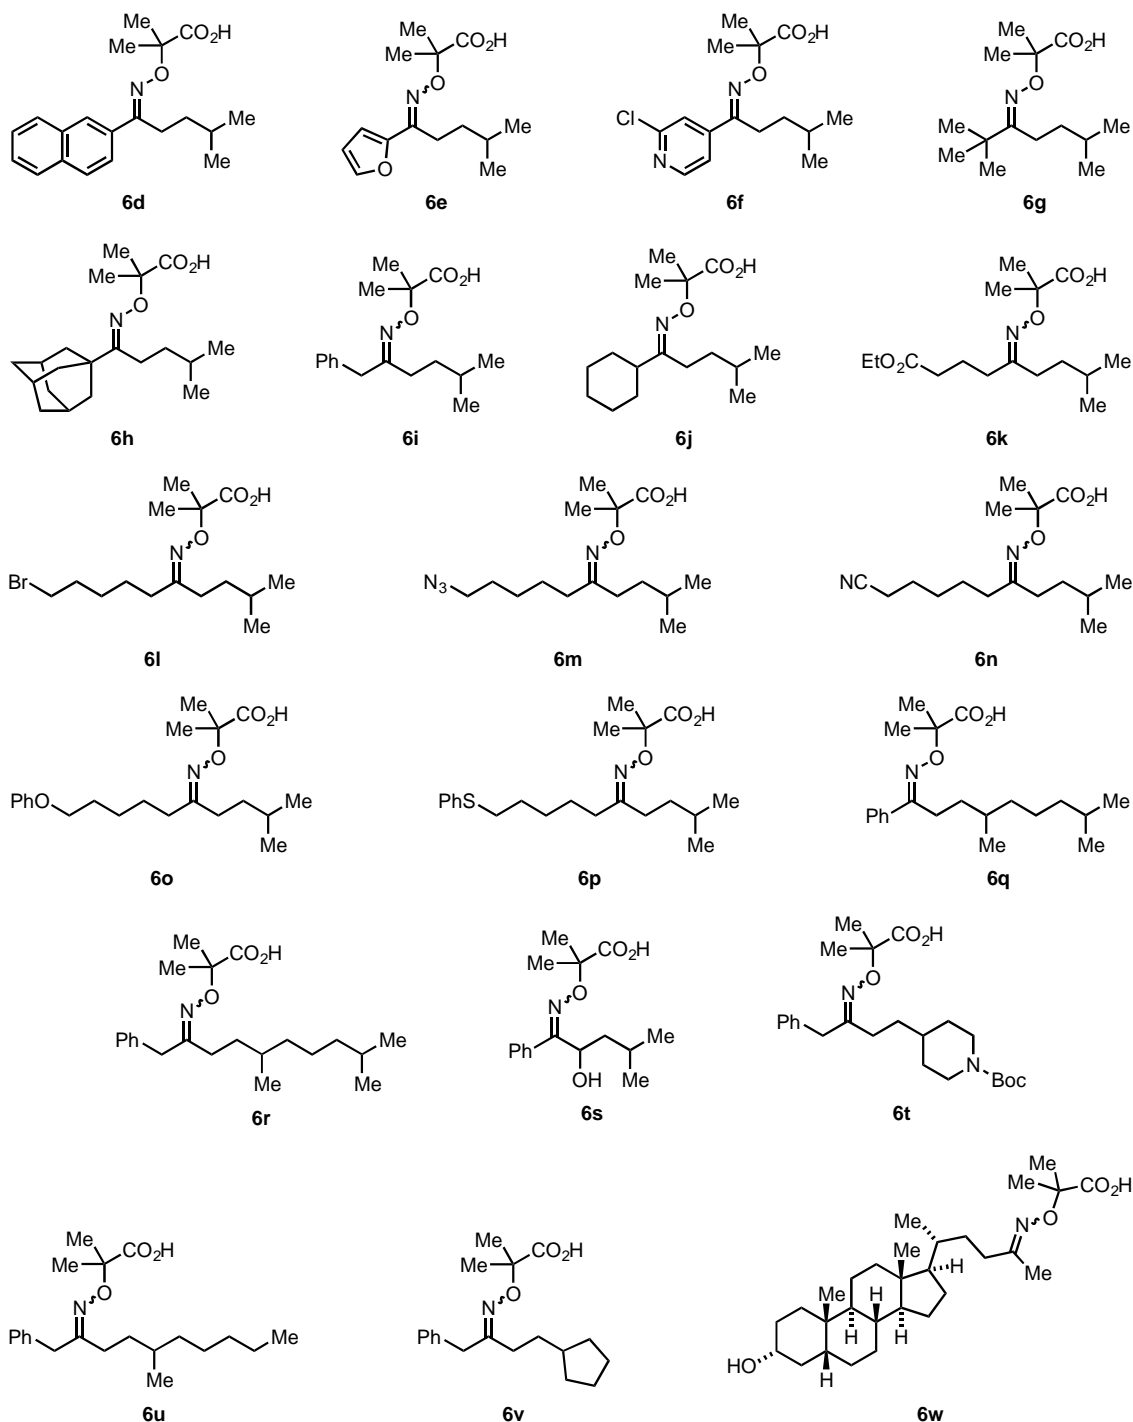

A solution of the ketone (1.0 equiv.) in MeOH (0.2 M) was treated with 1-carboxy-1-methylethoxyammonium chloride (1.5 equiv.), anhydrous NaOAc (3 equiv.) and heated to reflux until complete by TLC analysis (1-6 h). The mixture was allowed to cool to room temperature and an aqueous  $K_2CO_3$  solution was added. The solution was extracted with  $Et_2O$  and the organic layer washed with aqueous  $K_2CO_3$  solution (x 2). The combined aqueous extractions were then acidified with conc. HCl solution (30%  $H_2O$ ) and extracted with  $CH_2Cl_2$  (x 3). The combined organic fractions were dried ( $MgSO_4$ ), filtered and evaporated.

### 2-(((2,2-Dimethylcyclopentylidene)amino)oxy)-2-methylpropanoic Acid (**1a**)

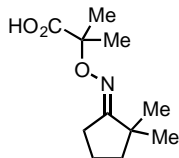

Following **GP4**, 2,2-dimethylcyclopentan-1-one (0.22 mL, 1.79 mmol) gave **1a** (381 mg, quant.) as an oil. FT-IR  $\nu_{\max}$  (film)/ $\text{cm}^{-1}$  2960, 1714, 1169, 969, 927, 881;  $^1\text{H}$  NMR (500 MHz,  $\text{CDCl}_3$ )  $\delta$  2.54 (2H, t,  $J = 7.5$  Hz), 1.82–1.74 (2H, m), 1.64 (2H, t,  $J = 6.9$  Hz), 1.49 (6H, s), 1.16 (6H, s);  $^{13}\text{C}$  NMR (126 MHz,  $\text{CDCl}_3$ )  $\delta$  176.6, 175.1, 81.1, 42.8, 40.7, 27.7, 26.4, 24.3, 20.8; HRMS (ESI) Found  $\text{MH}^+$  214.1434,  $\text{C}_{11}\text{H}_{20}\text{O}_3\text{N}$  requires 214.1438.

### 2-((Cyclobutylideneamino)oxy)-2-methylpropanoic Acid (**1b**)

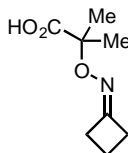

Following **GP4**, cyclobutanone (210 mg, 3 mmol) gave **1b** (180 mg, 35%) as an oil. FT-IR  $\nu_{\max}$  (film)/ $\text{cm}^{-1}$  2993, 1715, 1171, 974, 755;  $^1\text{H}$  NMR (500 MHz,  $\text{CDCl}_3$ )  $\delta$  2.95 (4H, dd,  $J = 12.5, 7.8$  Hz), 2.03 (2H, p,  $J = 8.1$  Hz), 1.50 (6H, s);  $^{13}\text{C}$  NMR ( $\text{CDCl}_3$ , 126 MHz)  $\delta$  178.2, 162.2, 81.2, 32.2, 31.7, 24.6, 14.9.

### 2-Methyl-2-(((2-phenylcyclobutylidene)amino)oxy)propanoic Acid (**1c**)

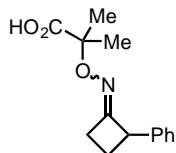

Following **GP4**, 2-phenylcyclobutan-1-one (146 mg, 0.73 mmol) gave **1c** (54 mg, 30%) as an oil. dr: 2.4:1. FT-IR  $\nu_{\max}$  (film)/ $\text{cm}^{-1}$  2360, 1735, 1264, 895, 732, 703, 568;  $^1\text{H}$  NMR (500 MHz,  $\text{CDCl}_3$ , *E:Z* isomers)  $\delta$  7.36–7.11 (5H, m), 3.05–2.86 (1H, m), 2.56–2.39 (2H, m), 2.09–2.01 (1H, m), 1.50 (4.3H, s), 1.29 (0.8H, s), 1.26 (0.8H, s);  $^{13}\text{C}$  NMR (126 MHz,  $\text{CDCl}_3$ , *E:Z* isomers)<sup>b</sup>  $\delta$  179.6<sup>M</sup>, 179.2<sup>m</sup>, 162.0<sup>M</sup>, 161.2<sup>m</sup>, 140.3<sup>M</sup>, 139.9<sup>m</sup>, 128.5, 128.4, 127.4, 127.0, 126.7, 80.9<sup>M</sup>, 80.7<sup>m</sup>, 50.1<sup>m</sup>, 49.4<sup>M</sup>, 29.5<sup>m</sup>, 28.9<sup>M</sup>, 24.3, 24.2, 24.1; HRMS (APCI) Found  $\text{M-H}^+$  246.1136,  $\text{C}_{14}\text{H}_{17}\text{O}_3\text{N}$  requires 246.1130.

<sup>b</sup> In this case not all  $^{13}\text{C}$  NMR signals could be assigned between the major (M) and the minor component owing to partial overlap.

## 2-Methyl-2-(((2-phenylcyclopentylidene)amino)oxy)propanoic Acid (**1d**)

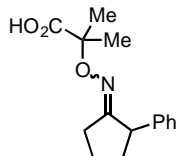

Following **GP4**, 2-phenylcyclopentan-1-one (197 mg, 1.2 mmol) gave **1d** (159 mg, 51%) as an oil. dr 1:1. FT-IR  $\nu_{\max}$  (film)/ $\text{cm}^{-1}$  3358, 2970, 1379, 1265, 1160, 1127, 949, 815, 734, 703, 561;  $^1\text{H}$  NMR (500 MHz,  $\text{CDCl}_3$ , *E:Z* isomers)  $\delta$  7.32 (2H, t,  $J = 7.5$  Hz), 7.27–7.20 (1H, m), 7.19 (2H, d,  $J = 7.4$  Hz), 3.79 (1H, t,  $J = 8.1$  Hz), 2.87–2.47 (2H, m), 2.35–2.21 (1H, m), 2.07–1.72 (3H, m), 1.48 (1.5H, s), 1.46 (1.5H, s);  $^{13}\text{C}$  NMR (126 MHz,  $\text{CDCl}_3$ , *E:Z* isomers)  $\delta$  175.5, 175.5, 171.8, 141.0, 129.0, 128.2, 127.3, 81.8, 50.2, 35.2, 29.2, 24.9, 24.8, 23.1; HRMS (APCI) Found  $[\text{M}-\text{H}]^-$  260.1292,  $\text{C}_{15}\text{H}_{19}\text{O}_3\text{N}$  requires 246.1287.

## 2-(((8-(*tert*-Butoxycarbonyl)-8-azaspiro[4.5]decan-1-ylidene)amino)oxy)-2-methylpropanoic Acid (**1e**)

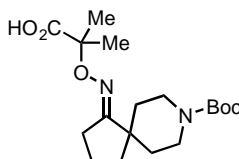

Following **GP4**, *tert*-butyl 1-oxo-8-azaspiro[4.5]decan-8-carboxylate (100 mg, 0.4 mmol) gave **1e** (120 mg, 85%) as a solid. FT-IR  $\nu_{\max}$  (film)/ $\text{cm}^{-1}$  2935, 1693, 1426, 1366, 1282, 1249, 1170, 904, 727;  $^1\text{H}$  NMR (400 MHz,  $\text{CDCl}_3$ )  $\delta$  3.66–3.53 (2H, m), 3.37–3.25 (2H, m), 2.54 (2H, t,  $J = 7.0$  Hz), 1.79–1.56 (6H, m), 1.47–1.44 (2H, m), 1.46 (6H, s), 1.43 (9H, s);  $^{13}\text{C}$  NMR (101 MHz,  $\text{CDCl}_3$ )  $\delta$  178.3, 170.8, 155.0, 81.2, 79.5, 44.3, 40.4, 37.8, 34.3, 28.5, 27.7, 24.3, 20.5; HRMS (ESI) Found  $\text{MK}^+$  393.1785,  $\text{C}_{18}\text{H}_{30}\text{O}_5\text{N}_2\text{K}$  requires 393.1786.

## 2-Methyl-2-(((2-phenylcyclohexylidene)amino)oxy)propanoic Acid (**1f**)

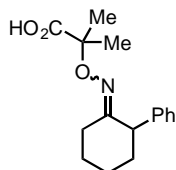

Following **GP4**, 2-phenylcyclohexan-1-one (500 mg, 2.87 mmol) gave **1f** (552 mg, 70%) as an oil. dr 1.5:1. FT-IR  $\nu_{\max}$  (film)/ $\text{cm}^{-1}$  3396 (br.), 2978, 2934, 1579, 1402, 1359, 1163, 958, 753, 698;  $^1\text{H}$  NMR (500 MHz,  $\text{CDCl}_3$ , *E/Z* isomers)  $\delta$  7.34–7.14 (5H, m), 4.74 (0.4H, br s), 3.56 (0.6H, dd,  $J = 8.4, 6.7$  Hz), 2.82–2.71 (0.6H, m), 2.39–2.22 (1.4H, m), 2.16–1.88 (2H,

m), 1.84–1.66 (2H, m), 1.61–1.41 (2H, m), 1.32 (1.2H, s), 1.30 (1.8H, s);  $^{13}\text{C}$  NMR (101 MHz,  $\text{CDCl}_3$ )  $\delta$  180.7, 180.6, 162.6, 162.3, 141.3, 140.1, 128.6, 128.5, 128.3, 127.4, 126.5, 126.1, 82.3, 82.3, 47.2, 37.7, 33.5, 26.7, 25.9, 25.5, 25.4, 25.1, 24.9, 24.5, 23.8; HRMS (ESI) Found  $\text{MK}^+$  314.1153,  $\text{C}_{16}\text{H}_{21}\text{O}_3\text{NK}$  requires 314.1153.

**(E)-2-Methyl-2-(((2-methyl-2-phenylcyclohexylidene)amino)oxy)propanoic Acid (1g)**

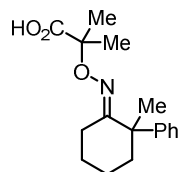

Following **GP4**, 2-methyl-2-phenylcyclohexan-1-one (967 mg, 5.1 mmol) gave **1g** (1.47 g, quant.) as an oil. FT-IR  $\nu_{\text{max}}$  (film)/ $\text{cm}^{-1}$  3019, 2940, 1713, 1446, 1215, 970, 920, 874, 877;  $^1\text{H}$  NMR (400 MHz,  $\text{CDCl}_3$ )  $\delta$  7.37–7.31 (2H, m), 7.25–7.19 (3H, m), 3.28–3.20 (1H, m), 2.65–2.57 (1H, m), 1.83–1.74 (1H, m), 1.72–1.56 (3H, m), 1.60 (3H, s), 1.58 (3H, s), 1.56–1.39 (2H, m), 1.32 (3H, s);  $^{13}\text{C}$  NMR (101 MHz,  $\text{CDCl}_3$ )  $\delta$  176.9, 167.6, 144.6, 128.9, 126.4, 126.2, 81.2, 47.2, 38.3, 29.9, 26.6, 24.5, 24.2, 23.4, 21.9; HRMS (ESI) Found  $\text{MNa}^+$  312.1570,  $\text{C}_{17}\text{H}_{23}\text{O}_3\text{NNa}$  requires 312.1570

**(E)-2-Methyl-2-(((2-phenylcycloheptylidene)amino)oxy)propanoic Acid (1h)**

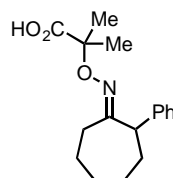

Following **GP4**, 2-phenylcycloheptanone (300 mg, 1.6 mmol) gave **1h** (351 mg, 76%) as an oil.  $^1\text{H}$  NMR (500 MHz,  $\text{CDCl}_3$ )  $\delta$  7.34–7.30 (2H, m), 7.25–7.19 (3H, m), 3.79 (1H, dd,  $J = 10.7, 5.4$  Hz), 2.93 (1H, ddd,  $J = 14.2, 6.7, 2.6$  Hz), 2.33–2.25 (1H, m), 2.16 (1H, ddd,  $J = 14.3, 11.9, 2.7$  Hz), 2.00–1.87 (3H, m), 1.58 (2H, dt,  $J = 13.3, 4.1$  Hz), 1.47 (6H, s), 1.41–1.35 (2H, m);  $^{13}\text{C}$  NMR (126 MHz,  $\text{CDCl}_3$ )  $\delta$  175.9, 168.1, 141.6, 128.6, 127.2, 126.8, 81.2, 49.4, 32.2, 30.7, 27.4, 26.9, 25.4, 24.4, 24.3; HRMS (APCI) Found  $\text{MH}^+$  290.1754,  $\text{C}_{17}\text{H}_{24}\text{O}_3\text{N}$  requires 290.1751.



**2-Methyl-2-(((2,2a,7,7a-tetrahydro-1H-cyclobuta[a]inden-1-ylidene)amino)oxy)propanoic Acid (1i)**

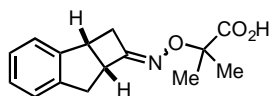

Following **GP4**, **S1** (400 mg, 2.5 mmol) gave **1i** (537 mg, 83%) as an oil. dr 1.4:1. FT-IR  $\nu_{\max}$  (film)/ $\text{cm}^{-1}$  2970, 1264, 732, 703, 564;  $^1\text{H}$  NMR ( $\text{CDCl}_3$ , 400 MHz, *E:Z* isomers)  $\delta$  7.33–7.18 (4H, m), 4.08–3.87 (2H, m), 3.57 (0.4H, d,  $J = 16.8$  Hz), 3.48–3.38 (1H, m), 3.32–3.22 (1.6H, m), 2.85 (0.6H, dt,  $J = 17.8, 3.3$  Hz), 2.74 (0.4H, dt,  $J = 16.8, 3.3$  Hz), 1.59 (1.3H, s), 1.56 (1.3H, s), 1.51 (1.7H, s), 1.50 (1.7H, s);  $^{13}\text{C}$  NMR ( $\text{CDCl}_3$ , 126 MHz, *E:Z* isomers);  $\delta$  179.6<sup>m</sup>, 179.5<sup>M</sup>, 163.0<sup>M</sup>, 161.6<sup>m</sup>, 144.7<sup>m</sup>, 144.6<sup>M</sup>, 143.2<sup>m</sup>, 143.1<sup>M</sup>, 127.0<sup>M</sup>, 127.0<sup>m</sup>, 126.9<sup>M</sup>, 126.9<sup>m</sup>, 124.9<sup>M</sup>, 124.6<sup>m</sup>, 124.8<sup>M</sup>, 124.7<sup>m</sup>, 80.5<sup>M</sup>, 80.5<sup>m</sup>, 47.4<sup>M</sup>, 47.1<sup>m</sup>, 40.5<sup>M</sup>, 39.6<sup>m</sup>, 39.6<sup>M</sup>, 39.4<sup>M</sup>, 37.0<sup>M</sup>, 34.7<sup>m</sup>, 24.1<sup>M</sup>, 23.5<sup>m</sup>, 24.0<sup>m</sup>, 23.8<sup>M</sup>; HRMS (ESI) Found  $\text{MH}^+$  259.1214,  $\text{C}_{15}\text{H}_{17}\text{O}_3\text{N}$  requires 259.1208.

**2-Methyl-2-(((3-tosyl-3-azabicyclo[3.2.0]heptan-6-ylidene)amino)oxy)propanoic Acid (1j)**

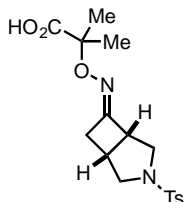

Following **GP4**, 3-tosyl-3-azabicyclo[3.2.0]heptan-6-one (100 mg, 0.38 mmol) gave **1j** (120 mg, 86%) as a solid. FT-IR  $\nu_{\max}$  (film)/ $\text{cm}^{-1}$  3334, 2930, 1264, 733, 703, 570;  $^1\text{H}$  NMR (500 MHz,  $\text{CDCl}_3$ )  $\delta$  7.70 (2H, d,  $J = 8.0$  Hz), 7.34 (2H, d,  $J = 8.0$  Hz), 3.96 (1H, d,  $J = 9.9$  Hz), 3.66 (1H, s), 3.57 (1H, d,  $J = 10.0$  Hz), 3.11 (1H, dd,  $J = 17.5, 8.6$  Hz), 2.91–2.84 (1H, m), 2.76–2.69 (2H, m), 2.66 (1H, dd,  $J = 9.8, 7.5$  Hz), 2.44 (3H, s), 1.52 (3H, s), 1.50 (3H, s);  $^{13}\text{C}$  NMR (126 MHz,  $\text{CDCl}_3$ )  $\delta$  175.8, 159.0, 144.0, 131.7, 129.7, 128.1, 81.3, 50.2, 47.7, 35.7, 32.3, 31.0, 24.1, 21.6; HRMS (ASAP) Found  $\text{MH}^+$  367.1322,  $\text{C}_{17}\text{H}_{23}\text{O}_5\text{N}_2\text{S}$  requires 367.1322.

**2-Methyl-2-(((1-methyl-3,4-dihydronaphthalen-2(1H)-ylidene)amino)oxy)propanoic Acid (1k)**

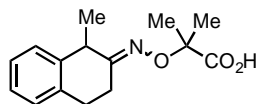

Following **GP4**, 1-methyl-3,4-dihydronaphthalen-2(1H)-one (145 mg, 0.9 mmol) gave **1k** (106 mg, 46%) as an oil. dr 1.8:1. FT-IR  $\nu_{\max}$  (film)/ $\text{cm}^{-1}$  3327, 2970, 2830, 2360, 1466, 1379, 1161, 1128, 1029, 951, 817;  $^1\text{H}$  NMR (500 MHz,  $\text{CDCl}_3$ , *E:Z* isomers)  $\delta$  7.22–6.98 (4H, m), 4.23 (0.3H, q,  $J = 7.2$  Hz), 3.56 (0.7H, q,  $J = 7.0$  Hz), 2.99–2.38 (4H, m), 1.43 (6H, s), 1.38 (2H, d,  $J = 7.1$  Hz), 1.35 (1H, d,  $J = 7.2$  Hz);  $^{13}\text{C}$  NMR (126 MHz,  $\text{CDCl}_3$ , *E:Z* isomers)<sup>b</sup>  $\delta$  178.6<sup>M</sup>, 178.5<sup>m</sup>, 163.6<sup>M</sup>, 163.4<sup>m</sup>, 157.03, 139.1<sup>m</sup>, 139.1<sup>M</sup>, 137.1<sup>M</sup>, 135.6<sup>m</sup>, 128.2<sup>m</sup>, 127.4<sup>m</sup>, 128.1<sup>M</sup>, 126.6<sup>M</sup>, 126.7<sup>m</sup>, 126.4<sup>M</sup>, 126.0<sup>M</sup>, 126.0<sup>m</sup>, 80.8, 80.5, 80.4, 38.9, 33.4, 28.8, 27.2, 26.8, 24.0, 24.0, 20.9<sup>M</sup>, 20.8<sup>m</sup>, 17.9; HRMS (APCI) Found  $\text{MH}^+$  260.1292,  $\text{C}_{15}\text{H}_{19}\text{O}_3\text{N}$  requires 260.1287.

**2-(((1,1-Dimethyl-3,4-dihydronaphthalen-2(1H)-ylidene)amino)oxy)-2-methylpropanoic Acid (1l)**

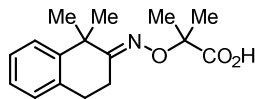

Following **GP4**, **S2** (270 mg, 1.26 mmol) gave **1l** (347 mg, quant) as a solid. FT-IR  $\nu_{\max}$  (film)/ $\text{cm}^{-1}$  2982, 1712, 1171, 967, 922, 895, 757;  $^1\text{H}$  NMR (400 MHz,  $\text{CDCl}_3$ )  $\delta$  7.41 (1H, d,  $J = 7.7$  Hz), 7.31–7.26 (1H, m), 7.21 (1H, td,  $J = 7.3, 1.2$  Hz), 7.17 (1H, d,  $J = 6.6$  Hz), 2.99 (2H, t,  $J = 6.6$  Hz), 2.92–2.87 (2H, m), 1.56 (6H, s), 1.55 (6H, s);  $^{13}\text{C}$  NMR (126 MHz,  $\text{CDCl}_3$ )  $\delta$  175.7, 168.7, 142.8, 135.8, 128.4, 127.1, 126.5, 125.1, 81.5, 41.4, 27.9, 27.6, 24.4, 22.9; HRMS (APCI) Found  $\text{MH}^+$  276.1584,  $\text{C}_{16}\text{H}_{22}\text{O}_3\text{N}$  requires 276.1594.

**2-(((3',4'-Dihydro-2'H-spiro[cyclohexane-1,1'-naphthalen]-2'-ylidene)amino)oxy)-2-methylpropanoic Acid (1m)**

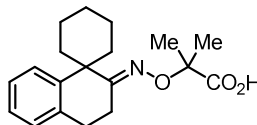

Following **GP4**, **S3** (460 mg, 2.15 mmol) gave **1m** (481 mg, 71%) as a solid. FT-IR  $\nu_{\max}$  (film)/ $\text{cm}^{-1}$  2926, 1712, 1169, 966, 928, 874, 752;  $^1\text{H}$  NMR (400 MHz,  $\text{CDCl}_3$ )  $\delta$  7.43 (1H, d,  $J = 7.8$  Hz), 7.26–7.21 (1H, m), 7.16 (1H, td,  $J = 7.4, 1.0$  Hz), 7.11 (1H, d,  $J = 7.2$  Hz), 3.01

(2H, t,  $J = 7.0$  Hz), 2.86 (2H, t,  $J = 7.0$  Hz), 2.16–2.10 (2H, m), 1.86–1.77 (2H, m), 1.76–1.61 (5H, m), 1.54 (6H, s), 1.39–1.29 (1H, m);  $^{13}\text{C}$  NMR (126 MHz,  $\text{CDCl}_3$ )  $\delta$  178.4, 165.3, 144.6, 136.5, 128.6, 126.6, 126.1, 125.4, 81.1, 45.5, 35.1, 29.0, 26.2, 24.3, 23.1, 21.7; HRMS (APCI) Found  $\text{MH}^+$  316.1901,  $\text{C}_{19}\text{H}_{26}\text{O}_3\text{N}$  requires 316.1907.

**2-Methyl-2-(((1-(4-phenyl-1-tosylpiperidin-4-yl)ethylidene)amino)oxy)propanoic Acid (1n)**

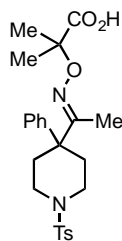

Following **GP4**, **S4** (432 mg, 1.2 mmol) gave **1n** (478 mg, 87%) as a solid. FT-IR  $\nu_{\text{max}}$  (film)/ $\text{cm}^{-1}$  3022, 1715, 1446, 1352, 1214, 1118, 971, 924, 753, 667, 659, 587, 573;  $^1\text{H}$  NMR (400 MHz,  $\text{CDCl}_3$ )  $\delta$  7.67 (2H, d,  $J = 7.6$  Hz), 7.39–7.29 (4H, m), 7.29–7.18 (3H, m), 3.60 (2H, d,  $J = 11.0$  Hz), 2.67 (2H, t,  $J = 11.2$  Hz), 2.45 (3H, s), 2.38–2.28 (2H, m), 2.12–2.01 (2H, m), 1.49 (3H, s), 1.40 (6H, s);  $^{13}\text{C}$  NMR (101 MHz,  $\text{CDCl}_3$ )  $\delta$  177.8, 159.6, 143.7, 143.5, 133.2, 129.7, 128.8, 127.9, 127.1, 126.0, 81.1, 46.8, 43.2, 32.9, 24.0, 21.5, 12.2; HRMS (ESI neg) Found  $\text{M-H}^+$  457.1803,  $\text{C}_{24}\text{H}_{29}\text{O}_5\text{N}_2\text{S}$  requires 457.1797.

**2-(((1-(1-(tert-Butoxycarbonyl)-4-phenylpiperidin-4-yl)ethylidene)amino)oxy)-2-methylpropanoic Acid (1o)**

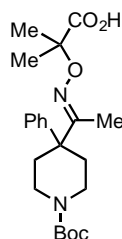

Following **GP4**, **S5** (432 mg, 1.2 mmol) gave **1o** (494 mg, quant.) as a solid. FT-IR  $\nu_{\text{max}}$  (film)/ $\text{cm}^{-1}$  3015, 1682, 1435, 1355, 1215, 1173, 696, 859, 751, 700, 573;  $^1\text{H}$  NMR (400 MHz,  $\text{CDCl}_3$ )  $\delta$  9.68–9.33 (1H, br. s), 7.36–7.26 (4H, m), 7.23 (1H, t,  $J = 6.9$  Hz), 3.99–3.69 (2H, br. s), 3.27–3.06 (1H, br. s), 2.32–2.19 (2H, m), 1.97–1.76 (2H, m), 1.61 (6H, s), 1.60 (3H, s), 1.46 (9H, s);  $^{13}\text{C}$  NMR (101 MHz,  $\text{CDCl}_3$ )  $\delta$  178.6, 159.5, 155.1, 144.3, 128.7, 126.8, 126.2, 81.2, 79.6, 47.5, 40.8, 33.4, 28.5, 24.2, 12.0; HRMS (ESI) found  $\text{MNa}^+$  427.2203,  $\text{C}_{22}\text{H}_{32}\text{O}_5\text{N}_2\text{Na}$  requires 427.2203.

**2-Methyl-2-((((1*S*,4*R*,*E*)-1,7,7-trimethylbicyclo[2.2.1]heptan-2-ylidene)amino)oxy)propanoic Acid (**1p**)**

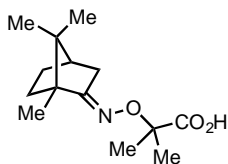

Following **GP4**, (*D*)-camphor (400 mg, 2.6 mmol) gave **1p** (256 mg, 39%) as an oil. dr 1:1. FT-IR  $\nu_{\max}$  (film)/ $\text{cm}^{-1}$  2958, 1714, 1174, 968, 921, 885, 757;  $^1\text{H}$  NMR (500 MHz,  $\text{CDCl}_3$ , *E:Z* isomers)  $\delta$  2.56–2.53 (1H, m), 2.08 (0.5H, s), 2.04 (0.5H, s), 1.98–1.93 (1H, m), 1.91–1.82 (1H, m), 1.76 (1H, td,  $J = 12.4, 3.9$  Hz), 1.49 (3H, s), 1.47 (3H, s), 1.45–1.39 (1H, m), 1.29–1.22 (1H, m), 1.02 (3H, s), 0.94 (3H, s), 0.79 (3H, s);  $^{13}\text{C}$  NMR (126 MHz,  $\text{CDCl}_3$ , *E:Z* isomers)  $\delta$  175.7, 174.3, 81.0, 52.8, 48.5, 43.5, 34.0, 32.4, 27.1, 24.5, 24.3, 19.4, 18.4, 11.0; HRMS (APCI) Found  $\text{MH}^+$  254.1747,  $\text{C}_{14}\text{H}_{24}\text{O}_3\text{N}$  requires 254.1751.

**2-((((8*R*,9*S*,13*S*,14*S*,*E*)-3-Acetoxy-13-methyl-6,7,8,9,11,12,13,14,15,16-decahydro-17*H*-cyclopenta[*a*]phenanthren-17-ylidene)amino)oxy)-2-methylpropanoic Acid (**1q**)**

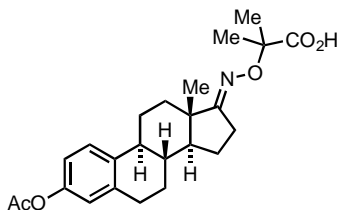

Following **GP4**, estrone (420 mg, 1.56 mmol) gave **1q** after acetylation<sup>c</sup> (432 mg, 67%), as a solid. FT-IR  $\nu_{\max}$  (film)/ $\text{cm}^{-1}$  2979, 2359, 2253, 1746, 1470, 1127, 903, 724, 650;  $^1\text{H}$  NMR (400 MHz,  $\text{CDCl}_3$ )  $\delta$  7.29 (1H, d,  $J = 8.5$  Hz), 6.85 (1H, dd,  $J = 8.5, 2.6$  Hz), 6.80 (1H, d,  $J = 2.5$  Hz), 2.93–2.83 (2H, m), 2.67–2.48 (2H, m), 2.44–2.35 (1H, m), 2.29 (3H, s), 2.00–1.89 (2H, m), 1.68–1.38 (8H, m), 1.50 (6H, d,  $J = 5.7$  Hz), 0.97 (3H, s);  $^{13}\text{C}$  NMR (101 MHz,  $\text{CDCl}_3$ )  $\delta$  176.3, 174.2, 169.9, 148.5, 138.0, 137.4, 126.4, 121.6, 118.8, 81.1, 45.0, 44.1, 37.7, 33.9, 29.4, 27.0, 26.2, 25.9, 24.4, 24.4, 22.9, 21.2, 17.2; HRMS (APCI) Found  $\text{MH}^+$  414.2284,  $\text{C}_{24}\text{H}_{32}\text{O}_5\text{N}$  requires 414.2275.

<sup>c</sup> Experimental procedure for the acetylation: A suspension of the crude in  $\text{H}_2\text{O}$  (2.0 mL) was cooled to 0 °C and treated with NaOH (82 mg, 2.04 mmol, 3.0 equiv.) and  $\text{Ac}_2\text{O}$  (0.18 mL, 2.04 mmol, 3.0 equiv.). The mixture was allowed to warm to room temperature overnight. The mixture was diluted with 1M HCl and EtOAc. The layers were separated and the aqueous layer was extracted with EtOAc (3 x 5mL). The combined organic layers were dried ( $\text{MgSO}_4$ ), filtered and evaporated. Purification by column chromatography on silica gel gave **1q**.

**2-(((3*R*,8*R*,9*S*,10*S*,13*S*,14*S*,*E*)-3-Acetoxy-10,13-dimethylhexadecahydro-17H-cyclopenta[*a*]phenanthren-17-ylidene)amino)oxy)-2-methylpropanoic Acid (**1r**)**

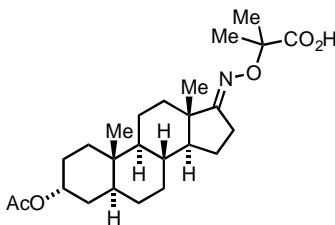

Following **GP4**, **S6** (200 mg, 0.6 mmol) gave **1r** (211 mg, 65%) as a solid. FT-IR  $\nu_{\max}$  (film)/ $\text{cm}^{-1}$  2945, 1724, 1443, 1355, 1245, 1026, 875, 754;  $^1\text{H}$  NMR (400 MHz,  $\text{CDCl}_3$ )  $\delta$  4.74–4.61 (1H, m), 2.60–2.39 (2H, m), 2.02 (3H, s), 1.94–1.87 (1H, m), 1.87–1.77 (2H, m), 1.77–1.68 (2H, m), 1.67–1.57 (2H, m), 1.55–1.42 (2H, m), 1.48 (3H, s), 1.46 (3H, s), 1.41–1.26 (6H, m), 1.25–1.13 (2H, m), 1.08–0.94 (2H, m), 0.91 (3H, s), 0.85 (3H, s), 0.78–0.69 (1H, m);  $^{13}\text{C}$  NMR (126 MHz,  $\text{CDCl}_3$ )  $\delta$  175.5, 175.0, 170.7, 81.2, 73.5, 54.3, 45.0, 44.6, 36.7, 35.6, 34.8, 33.9, 33.8, 31.4, 28.3, 27.4, 26.2, 24.4, 24.4, 23.1, 21.5, 20.6, 17.2, 12.2; HRMS (ASAP) Found  $\text{MH}^+$  434.2886,  $\text{C}_{25}\text{H}_{40}\text{O}_5\text{N}$  requires 434.2901.

**2-(((3*R*,8*R*,9*S*,10*R*,13*S*,14*S*,*E*)-3-acetoxy-10,13-dimethyl-1,2,3,4,7,8,9,10,11,12,13,14,15,16-tetradecahydro-17H-cyclopenta[*a*]phenanthren-17-ylidene)amino)oxy)-2-methylpropanoic Acid (**1s**)**

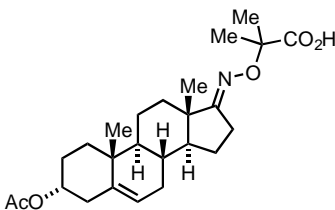

Following **GP4** but running the reaction overnight at room temperature, (3*R*,8*R*,9*S*,10*R*,13*S*,14*S*)-10,13-dimethyl-17-oxo-2,3,4,7,8,9,10,11,12,13,14,15,16,17-tetradecahydro-1H-cyclopenta[*a*]phenanthren-3-yl acetate (400 mg, 1.2 mmol) gave **1s** (436 mg, 84%) as a solid. FT-IR  $\nu_{\max}$  (film)/ $\text{cm}^{-1}$  2947, 1725, 1374, 1251, 1032, 754;  $^1\text{H}$  NMR (400 MHz,  $\text{CDCl}_3$ )  $\delta$  9.86 (1H, br s), 5.32 (1H, d,  $J = 4.9$  Hz), 4.54 (1H, dt,  $J = 10.3, 5.5$  Hz), 2.59–2.35 (2H, m), 2.35–2.17 (2H, m), 2.05–1.95 (1H, m), 1.99 (3H, s), 1.90 (1H, d,  $J = 11.7$  Hz), 1.86–1.71 (3H, m), 1.64–1.46 (4H, m), 1.44 (3H, s), 1.43 (3H, s), 1.47–1.26 (3H, m), 1.20–1.03 (2H, m), 0.99 (3H, s), 1.04–0.93 (1H, m), 0.87 (3H, s);  $^{13}\text{C}$  NMR (101 MHz,  $\text{CDCl}_3$ )  $\delta$  177.7, 173.0, 170.6, 139.8, 122.0, 80.8, 77.5, 77.1, 76.8, 73.8, 53.9, 50.1, 44.3, 38.0, 36.89, 36.7, 33.8, 31.3, 31.2, 27.6, 26.0, 24.3, 24.2, 23.2, 21.4, 20.4, 19.3, 16.9; HRMS (APCI) found  $\text{MH}^+$  432.2739,  $\text{C}_{25}\text{H}_{38}\text{O}_5\text{N}$  requires 432.2744.

**2-((((2*S*,4*aR*,4*bS*,6*aS*,7*aS*,8*aS*,8*bS*,8*cR*,8*dR*,9*aR*,9*bR*,*E*)-2-Acetoxy-9*b*-hydroxy-4*a*,6*a*-dimethyloctadecahydro-7*H*-cyclopropa[4,5]cyclopenta[1,2-*a*]cyclopropa[1]phenanthren-7-ylidene)amino)oxy)-2-methylpropanoic Acid (**1t**)**

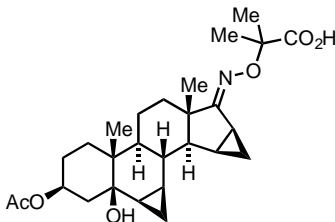

Following **GP4**, **S7** (210 mg, 0.44 mmol) gave **1t** (260 mg, quant.) as a solid. FT-IR  $\nu_{\max}$  (film)/ $\text{cm}^{-1}$  3018, 1730, 1443, 1352, 1215, 1144, 1040, 753, 668, 567;  $^{13}\text{C}$  NMR (126 MHz,  $\text{CDCl}_3$ )  $\delta$  175.5, 173.8, 169.9, 81.3, 72.9, 70.5, 54.5, 41.4, 40.8, 40.4, 37.2, 33.3, 24.6, 24.4, 24.4, 22.7, 22.6, 21.7, 21.5, 18.9, 16.4, 16.3, 14.9, 14.4, 11.4; HRMS (ASAP) Found  $\text{MH}^+$  474.2843,  $\text{C}_{27}\text{H}_{40}\text{O}_6\text{N}$  requires 474.2850.

**2-((((4*R*,6*aS*,9*R*,11*aR*,11*bS*,*Z*)-4-(Methoxycarbonyl)-4,9,11*b*-trimethyldodecahydro-6*a*,9-methanocyclohepta[*a*]naphthalen-8(7*H*)-ylidene)amino)oxy)-2-methylpropanoic Acid (**1u**)**

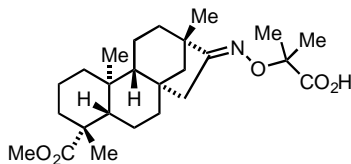

Following **GP4**, **S8** (332 mg, 1.0 mmol) gave **1u** (210 mg, 48%) as a solid; FT-IR  $\nu_{\max}$  (film)/ $\text{cm}^{-1}$  1710, 1265, 1223, 735, 703, 545;  $^1\text{H}$  NMR (400 MHz,  $\text{CDCl}_3$ )  $\delta$  3.65 (3H, s), 2.94 (1H, dd,  $J = 19.0, 3.3$  Hz), 2.24–2.13 (1H, m), 1.96 (1H, d,  $J = 19.0$  Hz), 1.91–1.76 (2H, m), 1.76–1.54 (5H, m), 1.49 (6H, s), 1.49–1.36 (3H, m), 1.29–1.21 (3H, m), 1.18 (3H, s), 1.10 (3H, s), 1.09–0.96 (2H, m), 0.92–0.80 (2H, m), 0.72 (3H, s);  $^{13}\text{C}$  NMR (101 MHz,  $\text{CDCl}_3$ )  $\delta$  178.0, 176.3, 174.3, 81.6, 57.5, 56.5, 55.1, 51.8, 45.0, 44.2, 41.4, 41.1, 40.3, 40.0, 38.4, 38.4, 38.3, 29.3, 24.9, 24.8, 22.5, 22.1, 20.8, 19.4, 13.6; HRMS (APCI) Found  $\text{MH}^+$  434.2899,  $\text{C}_{25}\text{H}_{39}\text{NO}_5$  requires 434.2906.

**2-(((8*R*,9*S*,13*S*,14*S*,*E*)-3-Methoxy-13-methyl-6,7,8,9,11,12,13,14,15,16-decahydro-17*H*-cyclopenta[*a*]phenanthren-17-ylidene)amino)oxy)-2-methylpropanoic Acid (**1v**)**

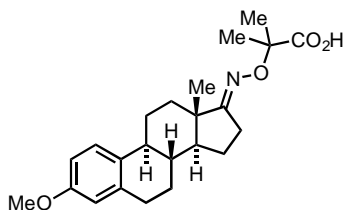

Following **GP4**, mestrone (70 mg, 0.25 mmol) gave **1v** (93 mg, quant.) as a solid. FT-IR  $\nu_{\max}$  (film)/ $\text{cm}^{-1}$  2929, 1716, 1499, 1169, 919, 753;  $^1\text{H}$  NMR (400 MHz,  $\text{CDCl}_3$ )  $\delta$  7.20 (1H, d,  $J = 8.6$  Hz), 6.72 (1H, dd,  $J = 8.6, 2.6$  Hz), 6.64 (1H, d,  $J = 2.4$  Hz), 3.78 (3H, s), 2.93–2.85 (2H, m), 2.67–2.47 (2H, m), 2.43–2.35 (1H, m), 2.29 (1H, m), 2.08 (1H, m), 2.00–1.91 (1H, m), 1.69–1.39 (5H, m), 1.51 (6H, d,  $J = 5.3$  Hz), 0.97 (3H, s);  $^{13}\text{C}$  NMR (101 MHz,  $\text{CDCl}_3$ )  $\delta$  176.0, 174.5, 157.6, 137.7, 132.0, 126.3, 113.9, 111.6, 81.16, 55.2, 52.8, 45.1, 43.9, 38.1, 33.9, 29.7, 27.2, 26.3, 26.1, 24.4, 24.4, 22.9, 17.3; HRMS (ESI) Found  $\text{MH}^+$  386.2322,  $\text{C}_{23}\text{H}_{32}\text{O}_4\text{N}$  requires 386.2326.

**(*E*)-2-Methyl-2-(((4-methyl-1-phenylpentylidene)amino)oxy)propanoic Acid (**6a**)**

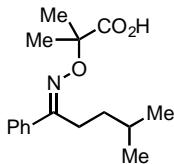

Following **GP4**, **S9** (654 mg, 3.70 mmol) gave **6a** (890 mg, 87%) as a solid. FT-IR  $\nu_{\max}$  (film)/ $\text{cm}^{-1}$  2955, 2869, 1714, 1468, 1295, 1169, 978, 920, 903, 764, 692;  $^1\text{H}$  NMR (400 MHz,  $\text{CDCl}_3$ )  $\delta$  7.63–7.58 (2H, m), 7.41–7.35 (3H, m), 2.83–2.75 (2H, m), 1.66–1.56 (1H, m), 1.60 (6H, s), 1.47–1.39 (2H, m), 0.94 (6H, d,  $J = 6.6$  Hz);  $^{13}\text{C}$  NMR (126 MHz,  $\text{CDCl}_3$ )  $\delta$  177.3, 161.4, 135.0, 129.7, 128.6, 126.5, 81.6, 35.4, 28.3, 24.9, 24.3, 22.3; HRMS (APCI) Found  $\text{MH}^+$  278.1746,  $\text{C}_{16}\text{H}_{24}\text{O}_3\text{N}$  requires 278.1751.

**(E)-2-(((1-(4-Methoxyphenyl)-4-methylpentylidene)amino)oxy)-2-methylpropanoic Acid (6b)**

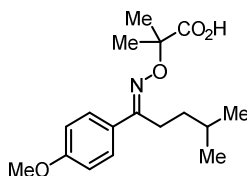

Following **GP4, S10** (413 mg, 2.0 mmol) gave **6b** (436 mg, 71%) as a solid. FT-IR  $\nu_{\max}$  (film)/ $\text{cm}^{-1}$  2955, 1713, 1607, 1513, 1466, 1297, 1249, 1174, 977, 830;  $^1\text{H}$  NMR (500 MHz,  $\text{CDCl}_3$ )  $\delta$  7.56 (2H, d,  $J = 8.5$  Hz), 6.90 (2H, d,  $J = 8.5$  Hz), 3.83 (3H, s), 2.79–2.74 (2H, m), 1.66–1.56 (1H, m), 1.58 (6H, s), 1.42 (2H, m), 0.94 (6H, d,  $J = 6.6$  Hz);  $^{13}\text{C}$  NMR (126 MHz,  $\text{CDCl}_3$ )  $\delta$  177.4, 161.2, 161.0, 127.9, 127.4, 114.1, 81.6, 55.5, 35.6, 28.4, 24.9, 24.5, 22.5; HRMS (APCI) Found  $\text{MH}^+$  308.1853,  $\text{C}_{17}\text{H}_{26}\text{O}_4\text{N}$  requires 308.1856.

**(E)-2-(((1-(4-Cyanophenyl)-4-methylpentylidene)amino)oxy)-2-methylpropanoic Acid (6c)**

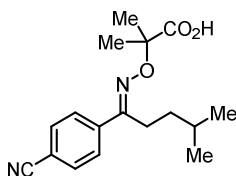

Following **GP4, S11** (273 mg, 1.36 mmol) gave **6c** (387 mg, 94%) as a solid. FT-IR  $\nu_{\max}$  (film)/ $\text{cm}^{-1}$  2955, 1716, 1612, 1302, 1250, 974, 821;  $^1\text{H}$  NMR (500 MHz,  $\text{CDCl}_3$ )  $\delta$  7.72 (2H, d,  $J = 8.1$  Hz), 7.65 (2H, d,  $J = 8.1$  Hz), 2.80–2.75 (2H, m), 1.62 (6H, s), 1.64–1.56 (1H, m), 1.42–1.40 (2H, m), 0.94 (6H, d,  $J = 6.6$  Hz);  $^{13}\text{C}$  NMR (126 MHz,  $\text{CDCl}_3$ )  $\delta$  176.5, 158.9, 139.5, 132.3, 126.9, 118.5, 112.9, 82.0, 35.2, 28.3, 24.4, 24.2, 22.3; HRMS (APCI)  $\text{MH}^+$  303.1691,  $\text{C}_{17}\text{H}_{23}\text{O}_3\text{N}_2$  requires 303.1703.

**(E)-2-Methyl-2-(((4-methyl-1-(naphthalen-2-yl)pentylidene)amino)oxy)propanoic Acid (6d)**

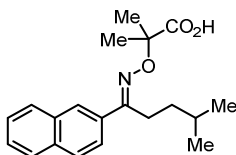

Following **GP4, S12** (367 mg, 1.62 mmol) gave **6d** (491 mg, 93%) as a solid. FT-IR  $\nu_{\max}$  (film)/ $\text{cm}^{-1}$  2956, 1715, 1467, 1170, 980, 750;  $^1\text{H}$  NMR (400 MHz,  $\text{CDCl}_3$ )  $\delta$  8.01 (1H, br s),



7.90–7.82 (3H, m), 7.80–7.77 (1H, m), 7.55–7.51 (2H, m), 2.98–2.89 (2H, m), 1.73–1.62 (1H, m), 1.64 (6H, s), 1.55–1.46 (2H, m), 0.97 (6H, d,  $J = 6.6$  Hz);  $^{13}\text{C}$  NMR (126 MHz,  $\text{CDCl}_3$ )  $\delta$  175.6, 161.0, 133.9, 133.1, 132.4, 128.6, 128.3, 127.7, 126.9, 126.5, 126.3, 123.7, 81.9, 35.5, 28.3, 24.8, 24.4, 22.4; HRMS (APCI) Found  $\text{MH}^+$  328.1913,  $\text{C}_{20}\text{H}_{26}\text{O}_3\text{N}$  requires 328.1907.

**2-(((1-(Furan-2-yl)-4-methylpentylidene)amino)oxy)-2-methylpropanoic Acid (6e)**

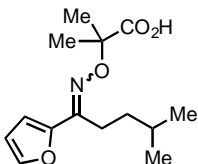

Following **GP4**, **S13** (374 mg, 2.25 mmol) gave **6e** (507 mg, 84%) as an oil. dr1:1. FT-IR  $\nu_{\text{max}}$  (film)/ $\text{cm}^{-1}$  2955, 1714, 1468, 1383, 1365, 1161, 979, 751;  $^1\text{H}$  NMR (400 MHz,  $\text{CDCl}_3$ , *E:Z* isomers)  $\delta$  7.51 (0.5H, dd,  $J = 1.7, 0.5$  Hz), 7.50–7.49 (0.5H, m), 7.36–7.35 (0.5H, m), 6.72 (0.5H, dd,  $J = 3.5, 0.5$  Hz), 6.55 (0.5H, dd,  $J = 3.5, 1.8$  Hz), 6.47 (0.5H, dd,  $J = 3.5, 1.8$  Hz), 2.73–2.66 (2H, m), 1.62 (3H, s), 1.58 (3H, s), 1.66–1.43 (3H, m), 0.95 (3H, d,  $J = 6.6$  Hz), 0.94 (3H, d,  $J = 6.6$  Hz);  $^{13}\text{C}$  NMR (126 MHz,  $\text{CDCl}_3$ , *E:Z* isomers)  $\delta$  176.4, 153.5, 149.4, 148.9, 145.1, 144.3, 143.2, 119.3, 112.2, 111.5, 111.4, 81.9, 81.8, 36.3, 35.7, 31.0, 30.0, 28.2, 27.7, 27.1, 24.5, 24.4, 24.3, 22.4, 22.3; HRMS (APCI) Found  $\text{MH}^+$  268.1544,  $\text{C}_{14}\text{H}_{22}\text{O}_4\text{N}$  requires 268.1543.

**2-(((1-(2-Chloropyridin-4-yl)-4-methylpentylidene)amino)oxy)-2-methylpropanoic Acid (6f)**

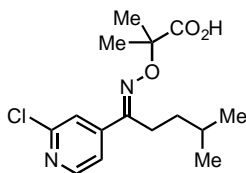

Following **GP4**, **S14** (128 mg, 0.57 mmol) gave **6f** (130 mg, 74%) as an oil. FT-IR  $\nu_{\text{max}}$  (film)/ $\text{cm}^{-1}$  2958, 1720, 1588, 1379, 1215, 1168, 986, 755;  $^1\text{H}$  NMR (500 MHz,  $\text{CDCl}_3$ )  $\delta$  8.38 (1H, d,  $J = 5.2$  Hz), 7.51 (1H, s), 7.41 (1H, d,  $J = 5.2$  Hz), 2.76–2.70 (2H, m), 1.62 (6H, s), 1.66–1.56 (1H, m), 1.42–1.38 (2H, m), 0.95 (6H, d,  $J = 6.6$  Hz);  $^{13}\text{C}$  NMR (126 MHz,  $\text{CDCl}_3$ )  $\delta$  176.1, 157.0, 152.2, 150.0, 146.0, 121.1, 119.3, 82.3, 35.0, 28.2, 24.4, 22.3; HRMS (APCI) Found  $\text{MH}^+$  313.1305,  $\text{C}_{15}\text{H}_{22}\text{O}_3\text{N}_2\text{Cl}$  requires 313.1313.

**(E)-2-Methyl-2-(((2,2,6-trimethylheptan-3-ylidene)amino)oxy)propanoic Acid (6g)**

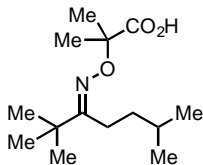

Following **GP4, S15** (300 mg, 1.9 mmol) gave **6g** (155 mg, 31%) as a solid. FT-IR  $\nu_{\max}$  (film)/ $\text{cm}^{-1}$  2958, 2870, 1716, 1468, 1364, 1175, 974, 898, 758;  $^1\text{H}$  NMR (400 MHz,  $\text{CDCl}_3$ )  $\delta$  11.50 (1H, br s), 2.34–2.27 (2H, m), 1.64–1.54 (1H, m), 1.50 (6H, s), 1.43–1.35 (2H, m), 1.16 (9H, s), 0.93 (6H, d,  $J = 6.6$  Hz);  $^{13}\text{C}$  NMR (101 MHz,  $\text{CDCl}_3$ )  $\delta$  175.6, 172.1, 81.1, 38.2, 35.3, 28.9, 27.6, 24.6, 24.4, 22.2; HRMS (APCI) Found  $\text{MH}^+$  258.2059,  $\text{C}_{14}\text{H}_{28}\text{O}_3\text{N}$  requires 258.2064.

**2-(((E)-1-((3*r*,5*r*,7*r*)-Adamantan-1-yl)-4-methylpentylidene)amino)oxy)-2-methylpropanoic Acid (6h)**

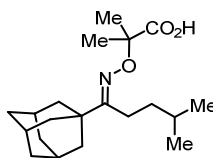

Following **GP4, S16** (230 mg, 0.98 mmol) gave **6h** (230 mg, 62%) as a solid. FT-IR  $\nu_{\max}$  (film)/ $\text{cm}^{-1}$  2903, 2849, 1711, 1451, 1291, 1173, 970, 918, 900;  $^1\text{H}$  NMR (400 MHz,  $\text{CDCl}_3$ )  $\delta$  2.31–2.25 (2H, m), 2.06 (3H, br s), 1.81–1.64 (12H, m), 1.62–1.52 (1H, m), 1.50 (6H, s), 1.39–1.31 (2H, m), 0.92 (6H, d,  $J = 6.6$  Hz);  $^{13}\text{C}$  NMR (126 MHz,  $\text{CDCl}_3$ )  $\delta$  175.6, 172.1, 81.1, 40.1, 39.3, 38.6, 36.5, 36.4, 35.3, 28.9, 27.9, 27.8, 24.4, 23.5, 22.2; HRMS (APCI) Found  $\text{MH}^+$  336.2524,  $\text{C}_{20}\text{H}_{34}\text{O}_3\text{N}$  requires 336.2533.

**2-Methyl-2-(((5-methyl-1-phenylhexan-2-ylidene)amino)oxy)propanoic Acid (6i)**

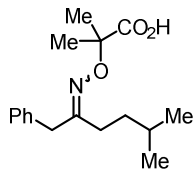

Following **GP4, S17** (600 mg, 3.16 mmol) gave **6i** (920 mg, quant.) as a solid. dr 1:1. FT-IR  $\nu_{\max}$  (film)/ $\text{cm}^{-1}$  2955 (br.), 2869, 1714, 1468, 1453, 1296, 1169, 983, 968, 908, 733, 700;  $^1\text{H}$  NMR (400 MHz,  $\text{CDCl}_3$ , *E:Z* isomers)  $\delta$  7.35–7.28 (2H, m), 7.28–7.23 (1H, m), 7.22–7.17 (2H, m), 3.73 (1H, s), 3.52 (1H, s), 2.30–2.25 (1H, m), 2.24–2.19 (1H, m), 1.52 (6H, s), 1.55–1.42 (1H, m), 1.42–1.33 (1H, m), 1.33–1.25 (1H, m), 0.86 (3H, d,  $J = 6.3$  Hz), 0.84 (3H, d,  $J = 6.3$  Hz);  $^{13}\text{C}$  NMR (101 MHz,  $\text{CDCl}_3$ , *E:Z* isomers)  $\delta$  177.2, 177.2, 163.7, 162.3, 136.2,

136.1, 129.0, 128.7, 127.0, 126.7, 81.2, 81.0, 40.6, 34.8, 34.5, 34.4, 31.9, 28.1, 27.5, 26.0, 24.3, 24.2, 22.3, 22.2; HRMS (APCI) Found  $MH^+$  292.1894,  $C_{17}H_{26}O_3N$  requires 292.1907.

**(E)-2-(((1-Cyclohexyl-4-methylpentylidene)amino)oxy)-2-methylpropanoic Acid (6j)**

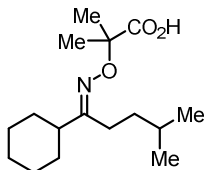

Following **GP4, S18** (200 mg, 1.12 mmol) gave **6j** (250 mg, 79%) as a solid. FT-IR  $\nu_{max}$  (film)/ $cm^{-1}$  2928, 2854, 1715, 1468, 1450, 1171, 975, 927, 755;  $^1H$  NMR (400 MHz,  $CDCl_3$ )  $\delta$  2.34–2.25 (2H, m), 2.26–2.13 (1H, m), 1.81 (4H, m), 1.54 (1H, dd,  $J = 16.6, 10.0$  Hz), 1.48 (6H, s), 1.42–1.13 (8H, m), 0.91 (6H, d,  $J = 6.6$  Hz);  $^{13}C$  NMR (101 MHz,  $CDCl_3$ )  $\delta$  175.9, 169.7, 81.1, 44.0, 35.0, 30.4, 28.6, 26.2, 26.1, 26.0, 24.5, 22.4.

**2-(((1-Ethoxy-8-methyl-1-oxononan-5-ylidene)amino)oxy)-2-methylpropanoic Acid (6k)**

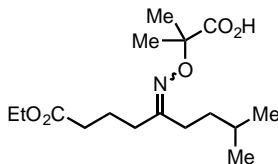

Following **GP4, S19** (513 mg, 2.4 mmol) gave **6k** (461 mg, 61%) as an oil. dr 1:1. FT-IR  $\nu_{max}$  (film)/ $cm^{-1}$  2955 (br.), 1732, 1714, 1170 (br.), 972;  $^1H$  NMR (400 MHz,  $CDCl_3$ , *E:Z* isomers)  $\delta$  4.17–4.11 (2H, m), 2.41–2.22 (6H, m), 1.91–1.79 (2H, m), 1.58–1.48 (1H, m), 1.50 (6H, s), 1.43–1.32 (2H, m), 1.26 (1.5H, t,  $J = 7.1$  Hz), 1.25 (1.5H, t,  $J = 7.1$  Hz), 0.91 (3H, d,  $J = 6.5$  Hz), 0.90 (3H, d,  $J = 6.6$  Hz);  $^{13}C$  NMR (126 MHz,  $CDCl_3$ , *E:Z* isomers)  $\delta$  176.2, 176.1, 173.2, 173.1, 164.4, 163.9, 81.2, 81.0, 60.6, 60.5, 34.8, 34.6, 33.8, 33.5, 33.3, 32.2, 28.2, 27.7, 27.6, 26.6, 24.3, 24.2, 22.3, 22.3, 21.2, 21.1, 14.2; HRMS (APCI) Found  $MH^+$  316.2103,  $C_{16}H_{30}O_5N$  requires 316.2118.

**2-(((10-Bromo-2-methyldecan-5-ylidene)amino)oxy)-2-methylpropanoic Acid (6l)**

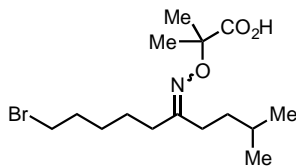

Following **GP4, S20** (300 mg, 1.2 mmol) gave **6l** (276 mg, 66%) as an oil. dr 1:1. FT-IR  $\nu_{max}$  (film)/ $cm^{-1}$  2955, 2867, 1716, 1467, 1362, 1170, 975, 755, 667;  $^1H$  NMR (400 MHz,  $CDCl_3$ ,

*E:Z* isomers)  $\delta$  3.42 (1H, t,  $J = 6.7$  Hz), 3.41 (1H, t,  $J = 6.7$  Hz), 2.41–2.31 (2H, m), 2.29–2.23 (2H, m), 1.92–1.85 (2H, m), 1.60–1.45 (5H, m), 1.49 (6H, s), 1.44–1.32 (2H, m), 0.92 (3H, d,  $J = 6.6$  Hz), 0.91 (3H, d,  $J = 6.6$  Hz);  $^{13}\text{C}$  NMR (101 MHz,  $\text{CDCl}_3$ , *E:Z* isomers)  $\delta$  175.8, 175.7, 165.3, 165.2, 81.1, 53.4, 34.8, 34.6, 34.1, 33.6, 33.4, 32.4, 32.4, 32.2, 28.3, 28.2, 28.1, 27.7, 27.7, 26.7, 25.0, 24.8, 24.4, 24.3, 22.3, 22.3; HRMS (ASAP) Found  $\text{MH}^+$  350.1311,  $\text{C}_{15}\text{H}_{29}\text{O}_3\text{NBr}$  requires 350.1325.

### 2-(((10-Azido-2-methyldecan-5-ylidene)amino)oxy)-2-methylpropanoic Acid (6m)

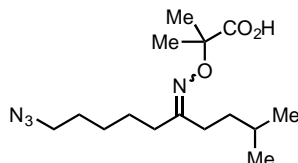

Following **GP4**, **S27** (93 mg, 0.44 mmol) gave **6m** (128 mg, 93%) as a yellow oil. dr 1:1.  $^1\text{H}$  NMR (500 MHz,  $\text{CDCl}_3$ , *E:Z* isomers)  $\delta$  3.27 (2H, t,  $J = 6.9$  Hz), 2.33–2.27 (2H, m), 2.12 (2H, q,  $J = 7.1$  Hz), 1.68–1.54 (2H, m), 1.55–1.45 (3H, m), 1.40 (6H, s), 1.43–1.24 (4H, m), 0.90 (3H, d,  $J = 6.6$  Hz), 0.87 (3H, d,  $J = 6.6$  Hz);  $^{13}\text{C}$  NMR (126 MHz,  $\text{CDCl}_3$ , *E:Z* isomers)  $\delta$  181.5, 159.9, 159.8, 81.7, 81.6, 51.3, 51.2, 47.6, 44.4, 35.5, 34.8, 33.9, 32.2, 28.6, 28.4, 28.2, 27.8, 27.7, 26.7, 26.4, 26.0, 25.3, 25.1, 25.0, 24.5, 22.4, 22.3; HRMS (ESI) Found  $\text{MNa}^+$  335.2023,  $\text{C}_{15}\text{H}_{28}\text{N}_4\text{NaO}_3$  requires 335.2059.

### 2-(((10-Cyano-2-methyldecan-5-ylidene)amino)oxy)-2-methylpropanoic Acid (6n)

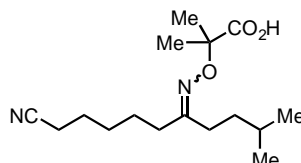

Following **GP4**, **S28** (90 mg, 0.46 mmol) gave **6n** (63 mg, 46%) as a yellow oil. dr 1:1. FT-IR  $\nu_{\text{max}}$  (film)/ $\text{cm}^{-1}$  3321, 2941, 2831, 1449, 1022, 668, 572;  $^1\text{H}$  NMR (400 MHz,  $\text{CDCl}_3$ , *E:Z* isomers)  $\delta$  2.41–2.30 (4H, m), 2.27–2.19 (2H, m), 1.74–1.63 (2H, m), 1.61–1.43 (5H, m), 1.50 (6H, s), 1.44–1.30 (2H, m), 0.92 (3H, d,  $J = 6.5$  Hz), 0.90 (3H, d,  $J = 6.5$  Hz);  $^{13}\text{C}$  NMR (101 MHz,  $\text{CDCl}_3$ , *E:Z* isomers)  $\delta$  176.7, 176.6, 164.4, 119.8, 119.7, 81.1, 81.0, 35.0, 34.7, 34.0, 32.5, 28.7, 28.3, 28.2, 27.8, 26.8, 25.2, 25.1, 25.0, 24.4, 24.3, 22.4, 22.3, 17.3, 17.2; HRMS (ESI) Found  $\text{MNa}^+$  297.2167,  $\text{C}_{16}\text{H}_{28}\text{N}_2\text{O}_3$  requires 297.2178.

## 2-Methyl-2-(((2-methyl-10-phenoxydecan-5-ylidene)amino)oxy)propanoic Acid (**6o**)

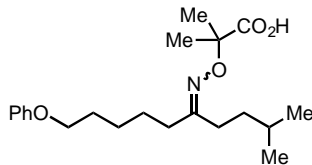

Following **GP4**, **S29** (200 mg, 0.76 mmol) gave **6o** (140 mg, 51%) as a yellow oil. dr 1.25:1.  $^1\text{H}$  NMR (400 MHz,  $\text{CDCl}_3$ , *E:Z* isomers)  $\delta$  7.32–7.12 (2H, m), 6.91–6.83 (1H, m), 6.81 (2H, d,  $J = 8.6$  Hz), 3.95–3.82 (2H, m), 2.38–2.24 (2H, m), 2.18 (2H, dt,  $J = 11.2, 7.6$  Hz), 1.79–1.68 (2H, m), 1.56–1.37 (5H, m), 1.42 (3H, s), 1.38–1.24 (2H, m), 1.41 (3H, s), 0.84 (3H, d,  $J = 6.3$  Hz), 0.83 (3H, d,  $J = 6.3$  Hz);  $^{13}\text{C}$  NMR (101 MHz,  $\text{CDCl}_3$ , *E:Z* isomers)  $\delta$  158.8, 129.2, 129.2, 129.2, 120.4, 120.3, 114.3, 114.27, 80.8, 80.7, 67.4, 67.3, 36.7, 34.7, 34.4, 34.0, 32.2, 28.8, 28.7, 28.4, 28.1, 28.0, 27.5, 26.4, 26.0, 25.5, 25.4, 25.3, 24.1, 22.5, 22.2, 22.1.

## 2-Methyl-2-(((2-methyl-10-(phenylthio)decan-5-ylidene)amino)oxy)propanoic Acid (**6p**)

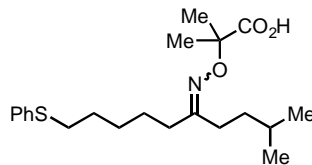

Following **GP4**, **S30** (140 mg, 0.5 mmol) gave **6p** (110 mg, 58%) as a pale yellow oil. dr 1.25:1. FT-IR  $\nu_{\text{max}}$  (film)/ $\text{cm}^{-1}$  1264, 734, 703, 545;  $^1\text{H}$  NMR (400 MHz,  $\text{CDCl}_3$ , *E:Z* isomers)  $\delta$  7.28–7.15 (5H, m), 2.98–2.77 (2H, m), 2.31–2.21 (2H, m), 2.17–2.07 (2H, m), 1.72–1.58 (2H, m), 1.42 (3H, s), 1.40 (3H, s), 1.50–1.22 (7H, m), 0.83 (3H, d,  $J = 6.7$  Hz), 0.82 (3H, d,  $J = 6.7$  Hz);  $^{13}\text{C}$  NMR (101 MHz,  $\text{CDCl}_3$ , *E:Z* isomers)  $\delta$  177.5, 177.4, 164.3, 164.2, 136.7, 129.1, 129.0, 127.5, 127.1, 125.8, 125.7, 80.8, 80.7, 34.9, 34.6, 34.1, 33.4, 32.3, 28.8, 28.7c, 28.3, 28.2, 28.1.1, 27.6, 26.5, 25.5, 25.2, 24.3, 22.4, 22.2; HRMS (APCI) Found  $\text{M-H}^+$  378.2097,  $\text{C}_{21}\text{H}_{32}\text{O}_3\text{NS}$  requires 378.2110.

## (*E*)-2-(((4,8-Dimethyl-1-phenylnonylidene)amino)oxy)-2-methylpropanoic Acid (**6q**)

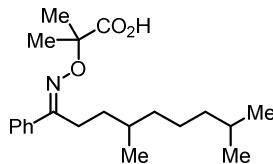

Following **GP4**, **S21** (400 mg, 1.63 mmol) gave **6q** (430 mg, 76%) as an oil. FT-IR  $\nu_{\text{max}}$  (film)/ $\text{cm}^{-1}$  3345, 2969, 1466, 1378, 1345, 1304, 1160, 1127, 1107, 950;  $^1\text{H}$  NMR (400 MHz,

CDCl<sub>3</sub>)  $\delta$  7.56–7.52 (2H, m), 7.37–7.29 (3H, m), 2.78–2.67 (2H, m), 1.53 (6H, s), 1.51–1.37 (5H, m), 1.33–1.15 (5H, m), 0.87 (3H d,  $J = 6.5$  Hz), 0.79 (6H, d,  $J = 6.6$  Hz); <sup>13</sup>C NMR (126 MHz, CDCl<sub>3</sub>)  $\delta$  165.9, 161.2, 141.0, 135.1, 132.9, 129.6, 128.6, 126.4, 81.8, 39.2, 36.7, 33.3, 33.0, 28.0, 24.7, 24.5, 24.5, 24.4, 22.7, 22.6, 19.5.

**2-(((5,9-Dimethyl-1-phenyldecan-2-ylidene)amino)oxy)-2-methylpropanoic Acid (6r)**

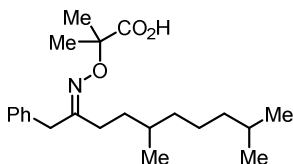

Following **GP4, S22** (200 mg, 0.76 mmol) gave **6r** (262 mg, 95%) as an oil. dr:1:1. FT-IR  $\nu_{\text{max}}$  (film)/cm<sup>-1</sup> 2953, 2925, 2868, 1715, 1467, 1453, 1378, 1363, 1169, 971, 735, 699; <sup>1</sup>H NMR (400 MHz, CDCl<sub>3</sub>, *E:Z* isomers)  $\delta$  7.35–7.24 (3H, m), 7.22–7.16 (2H, m), 3.76 (0.5H, d,  $J = 14.1$  Hz), 3.70 (0.5H, d,  $J = 14.1$  Hz), 3.52 (1H, s), 2.37–2.08 (2H, m), 1.51 (6H, s), 1.44–1.03 (8H, m), 0.89–0.82 (9H, m); <sup>13</sup>C NMR (126 MHz, CDCl<sub>3</sub>, *E:Z* isomers)  $\delta$  176.1, 176.0, 164.6, 163.2, 136.1, 135.9, 129.2, 129.1, 128.9, 128.9, 127.2, 126.9, 81.5, 81.3, 40.8, 39.4, 39.4, 37.0, 36.8, 34.7, 33.2, 33.0, 32.6, 32.5, 31.8, 28.1, 28.1, 27.7, 25.9, 24.8, 24.8, 24.5, 24.4, 22.8, 22.7, 22.7, 19.5, 19.4; HRMS (APCI) Found MH<sup>+</sup> 360.2544, C<sub>22</sub>H<sub>34</sub>NO<sub>3</sub> requires 360.2539.

**2-(((3-Hydroxy-5-methyl-1-phenylhexan-2-ylidene)amino)oxy)-2-methylpropanoic Acid (6s)**

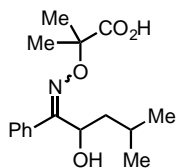

Following **GP4, S23** (103 mg, 0.5 mmol) gave **6s** (137 mg, 89%) as an oil. dr 4:1. FT-IR  $\nu_{\text{max}}$  (film)/cm<sup>-1</sup> 1710, 1418, 1359, 1220, 1091, 581; <sup>1</sup>H NMR (400 MHz, CDCl<sub>3</sub>, *E:Z* isomers)  $\delta$  7.22–7.06 (5H, m), 4.76–4.69 (0.2H, m), 4.16 (0.8H, br t,  $J = 6.2$  Hz), 3.82 (0.8H, d,  $J = 14.3$  Hz), 3.52 (0.8H, d,  $J = 14.3$  Hz), 3.51 (0.4H, br s), 1.70–1.54 (1H, m), 1.44 (6H, br s), 1.36–1.30 (1.6H, m), 1.28–1.12 (0.4H), 0.77 (2.4H, d,  $J = 6.7$  Hz), 0.71 (2.4H, d,  $J = 6.2$  Hz), 0.82–0.67 (1.2H, m); <sup>13</sup>C NMR (101 MHz, CDCl<sub>3</sub>, *E:Z* isomers)  $\delta$  179.0<sup>M</sup>, 178.9<sup>m</sup>, 164.0<sup>m</sup>, 161.1<sup>M</sup>, 136.8<sup>m</sup>, 136.4<sup>M</sup>, 131.0, 129.2, 128.7, 128.6, 128.3, 127.1, 126.8, 126.6, 81.5<sup>M</sup>, 81.3<sup>m</sup>, 70.8<sup>M</sup>, 67.8<sup>m</sup>, 45.8, 44.0<sup>M</sup>, 43.4<sup>m</sup>, 37.1<sup>m</sup>, 31.8<sup>M</sup>, 24.6<sup>m</sup>, 24.5<sup>M</sup>, 24.1<sup>M</sup>, 24.0<sup>M</sup>, 23.6<sup>M</sup>, 23.2<sup>m</sup>, 22.0<sup>M</sup>, 21.5<sup>m</sup>; HRMS (ESI) Found MH<sup>+</sup> 307.1784, C<sub>17</sub>H<sub>25</sub>NO<sub>4</sub> requires 307.1784.

**2-(((4-(1-(*tert*-Butoxycarbonyl)piperidin-4-yl)-1-phenylbutan-2-ylidene)amino)oxy)-2-methylpropanoic Acid (6t)**

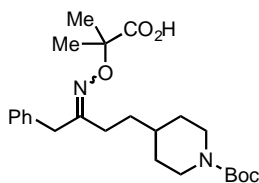

Following **GP4**, **S24** (200 mg, 0.6 mmol) gave **6t** (220 mg, 85%) as an oil. dr 1:1.  $^1\text{H}$  NMR (400 MHz,  $\text{CDCl}_3$ , *E:Z* isomers)  $\delta$  7.36–7.15 (5H, m), 4.04 (2H, br s), 3.73 (1H, s), 3.50 (1H, s), 2.62 (2H, br s,  $J = 11.9$  Hz), 2.30 (1H, t,  $J = 7.5$  Hz), 2.21 (1H, t,  $J = 7.5$  Hz), 1.66–1.59 (2H, m), 1.55 (3H, s), 1.55 (3H, s), 1.46 (4.5H, s), 1.45 (4.5H, s), 1.49–1.26 (3H, m), 1.11–0.91 (2H, m);  $^{13}\text{C}$  NMR (101 MHz,  $\text{CDCl}_3$ , *E:Z* isomers)  $\delta$  177.7, 177.6, 162.4, 161.0, 155.1, 136.4, 130.7, 129.1, 129.1, 128.8, 127.1, 126.8, 81.2, 81.1, 79.5, 40.7, 35.9, 35.3, 34.5, 32.4, 32.3, 31.9, 31.0, 28.6, 25.3, 24.3, 24.3.

**2-Methyl-2-(((5-methyl-1-phenyldecan-2-ylidene)amino)oxy)propanoic Acid (6u)**

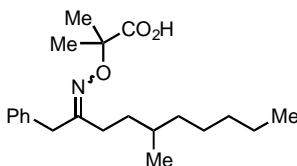

Following **GP4**, **S25** (144 mg, 0.62 mmol) gave **6u** (179 mg, 54%) as a pale yellow oil. dr 1.8:1. FT-IR  $\nu_{\text{max}}$  (film)/ $\text{cm}^{-1}$  3344, 2359, 1649, 1264, 1016, 733, 703;  $^1\text{H}$  NMR (400 MHz,  $\text{CDCl}_3$ , *E:Z* isomers)  $\delta$  7.34–7.09 (5H, m), 3.69 (0.4H, d,  $J = 13.2$  Hz), 3.63 (0.4H, d,  $J = 14.0$  Hz), 3.45 (1.2H, s), 2.19 (1.2H, t,  $J = 7.7$  Hz), 2.12–1.53 (0.8H, m), 2.02–1.53 (2H, m), 1.46 (6H, s), 1.41–0.96 (9H, m), 0.88–0.69 (6H, m);  $^{13}\text{C}$  NMR (101 MHz,  $\text{CDCl}_3$ , *E:Z* isomers)  $\delta$  176.6, 164.2, 162.8, 136.0, 135.9, 129.0, 129.0, 128.7, 127.0, 126.8, 81.3, 81.1, 40.7, 36.4, 36.1, 34.5, 33.0, 32.8, 32.3, 32.4, 31.7, 29.2, 29.1, 25.7, 24.3, 23.0, 19.4, 19.3, 14.1; HRMS (ESI) Found  $\text{MNa}^+$  370.2362,  $\text{C}_{21}\text{H}_{33}\text{NaO}_3$  requires 370.2358.

**2-(((4-Cyclopentyl-1-phenylbutan-2-ylidene)amino)oxy)-2-methylpropanoic Acid (6v)**

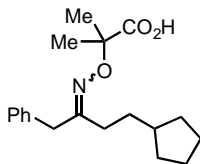

Following **GP4**, **S26** (86 mg, 0.4 mmol) gave **6v** (41 mg, 37%) as a colourless oil. dr 1.3:1. FT-IR  $\nu_{\text{max}}$  (film)/ $\text{cm}^{-1}$  1708, 1359, 12221, 582;  $^1\text{H}$  NMR (500 MHz,  $\text{CDCl}_3$ , *E:Z* isomers)  $\delta$

7.37–7.08 (5H, m), 3.73 (0.9H, s), 3.52 (1.1H, s), 2.31–2.26 (1.1H, m), 2.24–2.18 (0.9H, m), 1.79–1.64 (4H, m), 1.61–1.38 (7H, m), 1.53 (6H, s);  $^{13}\text{C}$  NMR (126 MHz,  $\text{CDCl}_3$ , *E:Z* isomers)  $\delta$  176.8<sup>M</sup>, 176.7<sup>m</sup>, 163.8<sup>M</sup>, 162.5<sup>m</sup>, 136.1<sup>m</sup>, 136.0<sup>M</sup>, 129.0<sup>M</sup>, 128.7<sup>m</sup>, 127.0<sup>M</sup>, 126.7<sup>m</sup>, 81.3<sup>m</sup>, 81.1<sup>M</sup>, 40.6, 40.1, 39.6, 34.5, 33.2, 32.4, 32.2, 31.9, 29.7, 27.4, 25.1, 24.3<sup>m</sup>, 24.3<sup>M</sup>; HRMS (ESI) Found  $\text{MNa}^+$  340.1891,  $\text{C}_{19}\text{H}_{27}\text{NaO}_3$  requires 340.1889.

**2-(((5-((5*R*,8*R*,9*S*,10*S*,13*R*,14*S*,17*R*)-3-Hydroxy-10,13-dimethylhexadecahydro-1H-cyclopenta[*a*]phenanthren-17-yl)hexan-2-ylidene)amino)oxy)-2-methylpropanoic Acid (6w)**

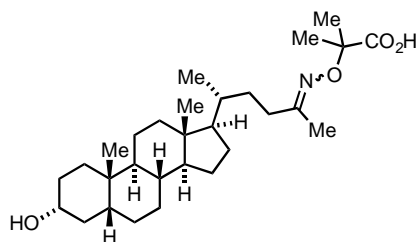

Following **GP4**, **S31** (150 mg, 0.4 mmol) gave **6w** (120 mg, 63%) as a solid. dr: 4:1. FT-IR  $\nu_{\text{max}}$  (film)/ $\text{cm}^{-1}$  3314, 2942, 2831, 1448, 1418, 606, 546;  $^1\text{H}$  NMR (400 MHz,  $\text{CDCl}_3$ , *E:Z* isomers)  $\delta$  3.73–3.57 (0.8H, m), 3.52–3.44 (0.2H, m), 2.08 (0.7H, s), 2.40–2.08 (2H, m), 2.00–1.92 (1H, m), 1.89 (2.3H, s), 1.86–1.45 (8H, m), 1.50 (6H, s), 1.43–1.32 (7H, m), 1.28–0.96 (10H, m), 0.91 (3H, s), 0.63 (0.7H, s), 0.62 (2.3H, s);  $^{13}\text{C}$  NMR (101 MHz,  $\text{CDCl}_3$ , *E:Z* isomers)  $\delta$  177.0<sup>M</sup>, 176.3<sup>m</sup>, 162.6<sup>m</sup>, 162.0<sup>M</sup>, 81.0<sup>M</sup>, 80.9<sup>m</sup>, 72.0, 56.6, 56.1<sup>M</sup>, 55.8<sup>m</sup>, 43.0, 42.2, 40.5, 40.3, 36.5, 35.9, 35.8, 35.4, 35.3, 34.7, 32.9, 32.2, 31.6, 30.6, 28.4<sup>M</sup>, 28.3<sup>m</sup>, 27.3, 26.5<sup>M</sup>, 26.5<sup>m</sup>, 24.5, 24.3, 23.5, 20.9, 20.4, 18.6<sup>m</sup>, 18.4<sup>M</sup>, 14.7, 12.1; HRMS (APCI) Found  $\text{MH}^+$  474.3589,  $\text{C}_{29}\text{H}_{49}\text{NO}_4$  requires 474.3583.



### 3 Reaction Optimizations

All reactions were optimised using Fuzumi's acridinium **2** as the photocatalyst.

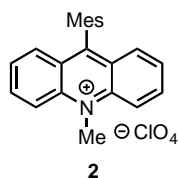

#### 3.1 Cascade Ring-Opening-Fluorination

##### General Procedure for the Reaction Optimization – GP5

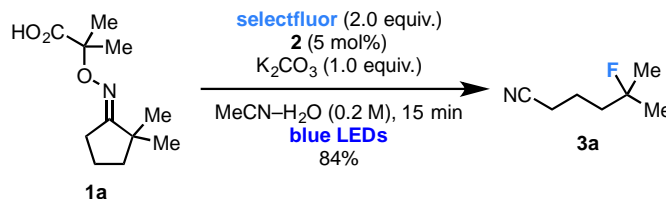

A dry tube equipped with a stirring bar was charged with **1a** (21 mg, 0.1 mmol, 1.0 equiv.), **2** (2 mg, 0.005 mmol, 5 mol%), the base (0.1 mmol, 1.0 equiv.), and the F-source (0.2 mmol, 2.0 equiv.). The reaction vessel was sealed, evacuated and back-filled with nitrogen three times, then sealed with parafilm. The solvent (0.5 mL) was added, the blue LEDs were switched on and the reaction was stirred under irradiation for the given amount time. H<sub>2</sub>O (1 mL), EtOAc (1 mL) and 1,3-Dinitrobenzene (4 mg, 0.025 mmol, 0.5 equiv.) were added. The layers were separated and the aqueous layer was extracted with EtOAc (2 x 2 mL). The combined organic layers were dried (MgSO<sub>4</sub>), filtered and evaporated. CDCl<sub>3</sub> (0.4 mL) was added and the mixture was analysed by <sup>1</sup>H NMR spectroscopy to determine the NMR yield.

The optimum reaction conditions identified by this optimisation study were:

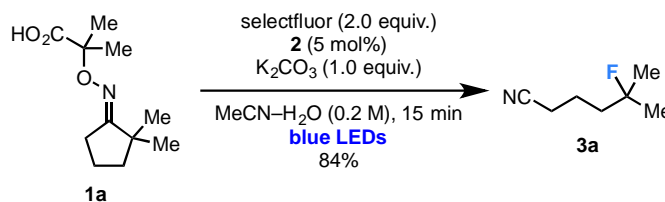

The following Table reports all experiments performed.

| Entry                                                                                                    | F-source                                                                            | Base                            | Solvent                     | Time   | Yield (%) |
|----------------------------------------------------------------------------------------------------------|-------------------------------------------------------------------------------------|---------------------------------|-----------------------------|--------|-----------|
| 1                                                                                                        | 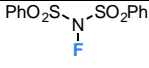   | CS <sub>2</sub> CO <sub>3</sub> | MeCN                        | 1h     | –         |
| 2                                                                                                        |    | CS <sub>2</sub> CO <sub>3</sub> | MeCN                        | 1h     | 13%       |
| 3                                                                                                        |    | CS <sub>2</sub> CO <sub>3</sub> | MeCN–H <sub>2</sub> O (1:1) | 1h     | 67        |
| 4                                                                                                        |    | K <sub>2</sub> CO <sub>3</sub>  | MeCN–H <sub>2</sub> O (1:1) | 1h     | 70%       |
| 5                                                                                                        |    | Et <sub>3</sub> N               | MeCN–H <sub>2</sub> O (1:1) | 1h     | 8%        |
| 6                                                                                                        |    | K <sub>2</sub> CO <sub>3</sub>  | MeCN–H <sub>2</sub> O (1:1) | 15 min | 84%       |
| <i>Control Experiments</i>                                                                               |                                                                                     |                                 |                             |        |           |
| 7 <sup>a</sup>                                                                                           |    | K <sub>2</sub> CO <sub>3</sub>  | MeCN–H <sub>2</sub> O (1:1) | 1h     | –         |
| 8 <sup>b</sup>                                                                                           |   | K <sub>2</sub> CO <sub>3</sub>  | MeCN–H <sub>2</sub> O (1:1) | 1h     | –         |
| 9                                                                                                        |  | –                               | MeCN–H <sub>2</sub> O (1:1) | 1h     | 8%        |
| <sup>a</sup> the reaction was run without light.<br><sup>b</sup> the reaction was run without <b>2</b> . |                                                                                     |                                 |                             |        |           |

### 3.2 Cascade Ring-Opening-Chlorination

#### General Procedure for the Reaction Optimization – GP6

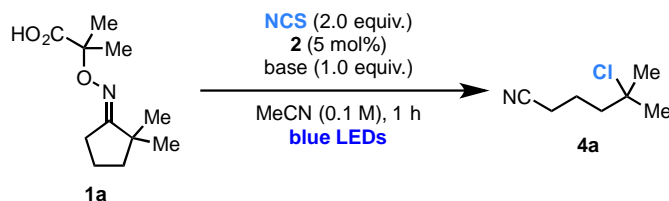

A dry tube equipped with a stirring bar was charged with **1a** (21 mg, 0.1 mmol, 1.0 equiv.), **2** (2 mg, 0.005 mmol, 5 mol%), the base (0.1 mmol, 1.0 equiv.), and NCS (27 mg, 0.2 mmol, 2.0 equiv.). The reaction vessel was sealed, evacuated and back-filled with nitrogen three times, then sealed with parafilm. MeCN (1.0 mL) was added, the blue LEDs were switched on and the reaction was stirred under irradiation for 1 h. H<sub>2</sub>O (1 mL), EtOAc (1 mL) and 1,3-Dinitrobenzene (4 mg, 0.025 mmol, 0.5 equiv.) were added. The layers were separated and the aqueous layer was extracted with EtOAc (2 x 2 mL). The combined organic layers were dried (MgSO<sub>4</sub>), filtered and evaporated. CDCl<sub>3</sub> (0.4 mL) was added and the mixture was analysed by <sup>1</sup>H NMR spectroscopy to determine the NMR yield.

The optimum reaction conditions identified by this optimisation study were:

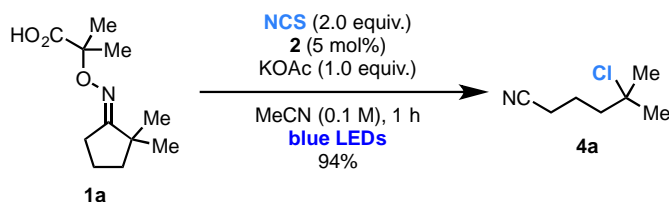

The following Table reports all experiments performed.

| Entry                                                                                                    | Base                            | Solvent | Time | Yield (%) |
|----------------------------------------------------------------------------------------------------------|---------------------------------|---------|------|-----------|
| 1                                                                                                        | Cs <sub>2</sub> CO <sub>3</sub> | MeCN    | 1 h  | 65        |
| 2                                                                                                        | K <sub>2</sub> CO <sub>3</sub>  | MeCN    | 1 h  | 84        |
| 3                                                                                                        | KOAc                            | MeCN    | 1 h  | 94        |
| <i>Control Experiments</i>                                                                               |                                 |         |      |           |
| 4                                                                                                        | KOAc                            | MeCN    | 1 h  | –         |
| 5                                                                                                        | KOAc                            | MeCN    | 1 h  | –         |
| 6                                                                                                        | –                               | MeCN    | 1 h  | –         |
| <sup>a</sup> the reaction was run without light.<br><sup>b</sup> the reaction was run without <b>2</b> . |                                 |         |      |           |

### 3.3 Cascade Ring Opening-Azidation

#### General Procedure for the Reaction Optimization – GP7

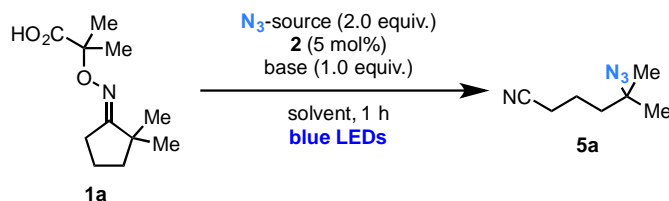

A dry tube equipped with a stirring bar was charged with **1a** (21 mg, 0.1 mmol, 1.0 equiv.), **2** (2 mg, 0.005 mmol, 5 mol%), the base (0.1 mmol, 1.0 equiv.), and the azide source (0.2 mmol, 2.0 equiv.). The reaction vessel was sealed, evacuated and back-filled with nitrogen three times, then sealed with parafilm. The solvent (0.2 mL, 0.1 M) was added, the blue LEDs were switched on and the reaction was stirred under irradiation. H<sub>2</sub>O (1 mL), EtOAc (1 mL) and 1,3-Dinitrobenzene (4 mg, 0.025 mmol, 0.5 equiv.) were added. The layers were separated and the aqueous layer was extracted with EtOAc (2 x 2 mL). The combined organic layers were dried (MgSO<sub>4</sub>), filtered and evaporated. CDCl<sub>3</sub> (0.4 mL) was added and the mixture was analysed by <sup>1</sup>H NMR spectroscopy to determine the NMR yield.

The optimum reaction conditions identified by this optimisation study were:

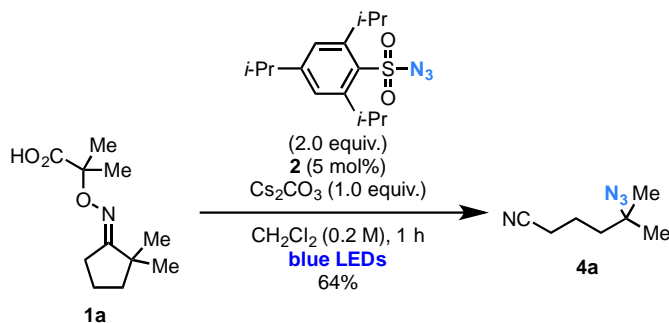

The following Table reports all experiments performed.

| Entry                                                                                            | N <sub>3</sub> -source                                                                       | Base                            | Solvent                         | Yield (%) |
|--------------------------------------------------------------------------------------------------|----------------------------------------------------------------------------------------------|---------------------------------|---------------------------------|-----------|
| 1                                                                                                | 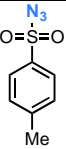            | Cs <sub>2</sub> CO <sub>3</sub> | toluene                         | –         |
| 2                                                                                                |             | Cs <sub>2</sub> CO <sub>3</sub> | toluene                         | 45%       |
| 3                                                                                                |             | Cs <sub>2</sub> CO <sub>3</sub> | toluene                         | traces    |
| 4                                                                                                |             | Cs <sub>2</sub> CO <sub>3</sub> | CH <sub>2</sub> Cl <sub>2</sub> | 64%       |
| <i>Control Experiments</i>                                                                       |                                                                                              |                                 |                                 |           |
| 5                                                                                                | <br>(4.0)  | Cs <sub>2</sub> CO <sub>3</sub> | CH <sub>2</sub> Cl <sub>2</sub> | –         |
| 6                                                                                                | <br>(4.0) | Cs <sub>2</sub> CO <sub>3</sub> | CH <sub>2</sub> Cl <sub>2</sub> | –         |
| 7                                                                                                | <br>(4.0) | –                               | CH <sub>2</sub> Cl <sub>2</sub> | –         |
| <sup>a</sup> the reaction was run without light.<br><sup>b</sup> the reaction was run without 2. |                                                                                              |                                 |                                 |           |

### 3.4 Cascade 1,5-H Abstraction-Chlorination

#### General Procedure for the Reaction Optimization – GP8

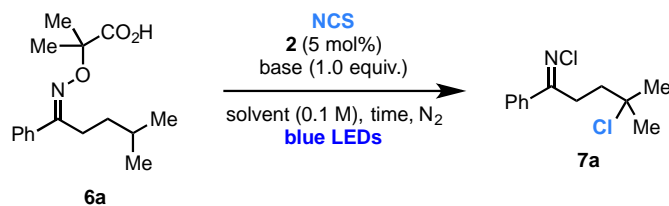

A dry tube equipped with a stirring bar was charged with **6a** (28 mg, 0.1 mmol, 1.0 equiv.), **2** (2 mg, 0.005 mmol, 5 mol%), the base (0.1 mmol, 1.0 equiv.), and NCS (54 mg, 0.4 mmol, 4 equiv.). The reaction vessel was sealed, evacuated and back-filled with nitrogen three times. The solvent (1 mL) was added, the blue LEDs were switched on and the reaction was stirred under irradiation, under a constant flow of nitrogen for the given amount of time. H<sub>2</sub>O (1 mL), EtOAc (1 mL) and 1,3-Dinitrobenzene (4 mg, 0.025 mmol, 0.5 equiv.) were added. The layers were separated and the aqueous layer was extracted with EtOAc (2 x 2 mL). The combined organic layers were dried (MgSO<sub>4</sub>), filtered and evaporated. CDCl<sub>3</sub> (0.4 mL) was added and the mixture was analysed by <sup>1</sup>H NMR spectroscopy to determine the NMR yield.

The optimum reaction conditions identified by this optimisation study were:

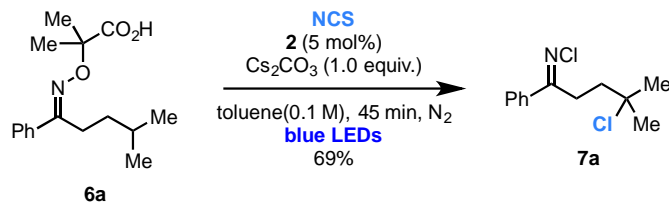

The following Table reports all experiments performed.

| Entry                                                                                                    | Base                            | Solvent                         | Time   | Yield (%) |
|----------------------------------------------------------------------------------------------------------|---------------------------------|---------------------------------|--------|-----------|
| 1                                                                                                        | K <sub>2</sub> CO <sub>3</sub>  | toluene                         | 16 h   | 41        |
| 2                                                                                                        | Cs <sub>2</sub> CO <sub>3</sub> | CH <sub>2</sub> Cl <sub>2</sub> | 16 h   | 41        |
| 3                                                                                                        | Cs <sub>2</sub> CO <sub>3</sub> | toluene                         | 16 h   | 57        |
| 4                                                                                                        | Cs <sub>2</sub> CO <sub>3</sub> | Toluene                         | 45 min | 69        |
| <i>Control Experiments</i>                                                                               |                                 |                                 |        |           |
| 5                                                                                                        | Cs <sub>2</sub> CO <sub>3</sub> | toluene                         | 1 h    | –         |
| 6                                                                                                        | Cs <sub>2</sub> CO <sub>3</sub> | toluene                         | 1 h    | –         |
| 7                                                                                                        | –                               | toluene                         | 1 h    | –         |
| <sup>a</sup> the reaction was run without light.<br><sup>b</sup> the reaction was run without <b>2</b> . |                                 |                                 |        |           |



### 3.5 Cascade 1,5-H Abstraction-Fluorination

#### General Procedure for the Reaction Optimization – GP8

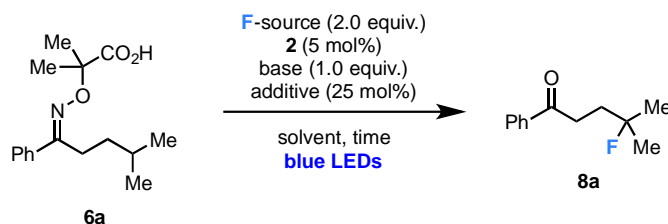

A dry tube equipped with a stirring bar was charged with **6a** (14 mg, 0.05 mmol, 1.0 equiv.), **2** (2 mg, 0.005 mmol, 5 mol%), the base (0.05 mmol, 1.0 equiv.), the F-source (0.1 mmol, 2.0 equiv.) and the additive (0.0125 mmol, 25 mol%). The reaction vessel was sealed, evacuated and back-filled with nitrogen three times. The solvent was added, the blue LEDs were switched on and the reaction was stirred under irradiation, under a constant flow of nitrogen. H<sub>2</sub>O (1 mL), EtOAc (1 mL) and 1,3-Dinitrobenzene (4 mg, 0.025 mmol, 0.5 equiv.) were added. The layers were separated and the aqueous layer was extracted with EtOAc (2 x 2 mL). The combined organic layers were dried (MgSO<sub>4</sub>), filtered and evaporated. CDCl<sub>3</sub> (0.4 mL) was added and the mixture was analysed by <sup>1</sup>H NMR spectroscopy to determine the NMR yield.

The optimum reaction conditions identified by this optimisation study were:

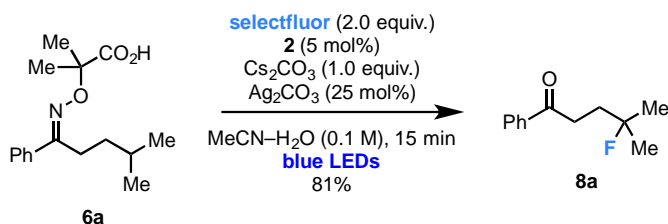

The following Table reports all experiments performed.

| Entry | F-Source | Base                            | Additive (equiv.)                      | Solvent (M)                             | Time   | Yield (%) |
|-------|----------|---------------------------------|----------------------------------------|-----------------------------------------|--------|-----------|
| 1     |          | Cs <sub>2</sub> CO <sub>3</sub> | –                                      | CH <sub>2</sub> Cl <sub>2</sub> (0.1 M) | 16 h   | –         |
| 2     |          | Cs <sub>2</sub> CO <sub>3</sub> | –                                      | CH <sub>2</sub> Cl <sub>2</sub> (0.1 M) | 1 h    | –         |
| 3     |          | K <sub>2</sub> CO <sub>3</sub>  | –                                      | CH <sub>2</sub> Cl <sub>2</sub> (0.1 M) | 1 h    | –         |
| 4     |          | KH <sub>2</sub> PO <sub>4</sub> | –                                      | CH <sub>2</sub> Cl <sub>2</sub> (0.1 M) | 1 h    | –         |
| 5     |          | CsF                             | –                                      | CH <sub>2</sub> Cl <sub>2</sub> (0.1 M) | 1 h    | –         |
| 6     |          | Cs <sub>2</sub> CO <sub>3</sub> | –                                      | HFIP (0.1M)                             | 1 h    | –         |
| 7     |          | Cs <sub>2</sub> CO <sub>3</sub> | –                                      | toluene (0.1M)                          | 1 h    | –         |
| 8     |          | Cs <sub>2</sub> CO <sub>3</sub> | –                                      | MeCN (0.1M)                             | 1 h    | –         |
| 9     |          | Cs <sub>2</sub> CO <sub>3</sub> | –                                      | CH <sub>2</sub> Cl <sub>2</sub> (0.1 M) | 16 h   | –         |
| 10    |          | Cs <sub>2</sub> CO <sub>3</sub> | –                                      | MeCN (0.1M)                             | 1 h    | –         |
| 11    |          | Cs <sub>2</sub> CO <sub>3</sub> | –                                      | MeCN–H <sub>2</sub> O 1:1 (0.1M)        | 1 h    | 17        |
| 12    |          | Cs <sub>2</sub> CO <sub>3</sub> | Ag <sub>2</sub> CO <sub>3</sub> (0.25) | MeCN–H <sub>2</sub> O 1:1 (0.1M)        | 15 min | 81        |

| Entry                      | F-Source                                                                            | Base                             | Additive (equiv.)                      | Solvent (M)                       | Time   | Yield (%) |
|----------------------------|-------------------------------------------------------------------------------------|----------------------------------|----------------------------------------|-----------------------------------|--------|-----------|
| 13                         | 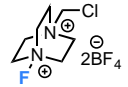   | Cs <sub>2</sub> CO <sub>3</sub>  | Ag <sub>2</sub> CO <sub>3</sub> (0.25) | MeCN–H <sub>2</sub> O 1:1 (0.05M) | 15 min | 65        |
| 14                         |    | Cs <sub>2</sub> CO <sub>3</sub>  | Ag <sub>2</sub> NO <sub>3</sub> (0.25) | MeCN–H <sub>2</sub> O 1:1 (0.05M) | 15 min | 60        |
| 15                         |    | Cs <sub>2</sub> CO <sub>3</sub>  | AgSbF <sub>6</sub> (0.25)              | MeCN–H <sub>2</sub> O 1:1 (0.05M) | 15 min | 20        |
| 16                         |    | Cs <sub>2</sub> CO <sub>3</sub>  | Ag(phen) <sub>2</sub> OTf<br>(0.25)    | MeCN–H <sub>2</sub> O 1:1 (0.05M) | 15 min | 39        |
| 17                         |    | Cs <sub>2</sub> CO <sub>3</sub>  | AgBF <sub>4</sub> (0.25)               | MeCN–H <sub>2</sub> O 1:1 (0.05M) | 15 min | 32        |
| 18                         |    | Cs <sub>2</sub> CO <sub>3</sub>  | AgO (0.25)                             | MeCN–H <sub>2</sub> O 1:1 (0.05M) | 15 min | 19        |
| 19                         |   | NaH <sub>2</sub> PO <sub>4</sub> | Ag <sub>2</sub> CO <sub>3</sub> (0.25) | MeCN–H <sub>2</sub> O 1:1 (0.1M)  | 15 min | 40        |
| 20                         |  | Cs <sub>2</sub> CO <sub>3</sub>  | Ag <sub>2</sub> CO <sub>3</sub> (0.25) | MeCN–H <sub>2</sub> O 1:1 (0.1M)  | 15 min | 11        |
| <i>Control Experiments</i> |                                                                                     |                                  |                                        |                                   |        |           |
| 21 <sup>a</sup>            |  | Cs <sub>2</sub> CO <sub>3</sub>  | Ag <sub>2</sub> CO <sub>3</sub> (0.25) | MeCN–H <sub>2</sub> O 1:1 (0.1M)  | 15 min | 34        |

| Entry                                                                                                            | F-Source                                                                          | Base                            | Additive (equiv.)                      | Solvent (M)                      | Time   | Yield (%) |
|------------------------------------------------------------------------------------------------------------------|-----------------------------------------------------------------------------------|---------------------------------|----------------------------------------|----------------------------------|--------|-----------|
| 22 <sup>b</sup>                                                                                                  | 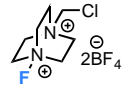 | Cs <sub>2</sub> CO <sub>3</sub> | Ag <sub>2</sub> CO <sub>3</sub> (0.25) | MeCN-H <sub>2</sub> O 1:1 (0.1M) | 15 min | –         |
| 23                                                                                                               |  | –                               | Ag <sub>2</sub> CO <sub>3</sub> (0.25) | MeCN-H <sub>2</sub> O 1:1 (0.1M) | 15 min | 2         |
| <p><sup>a</sup> the reaction was run without <b>2</b>.</p> <p><sup>b</sup> the reaction was run in the dark.</p> |                                                                                   |                                 |                                        |                                  |        |           |

#### 4 Picture of Reaction Set-Up

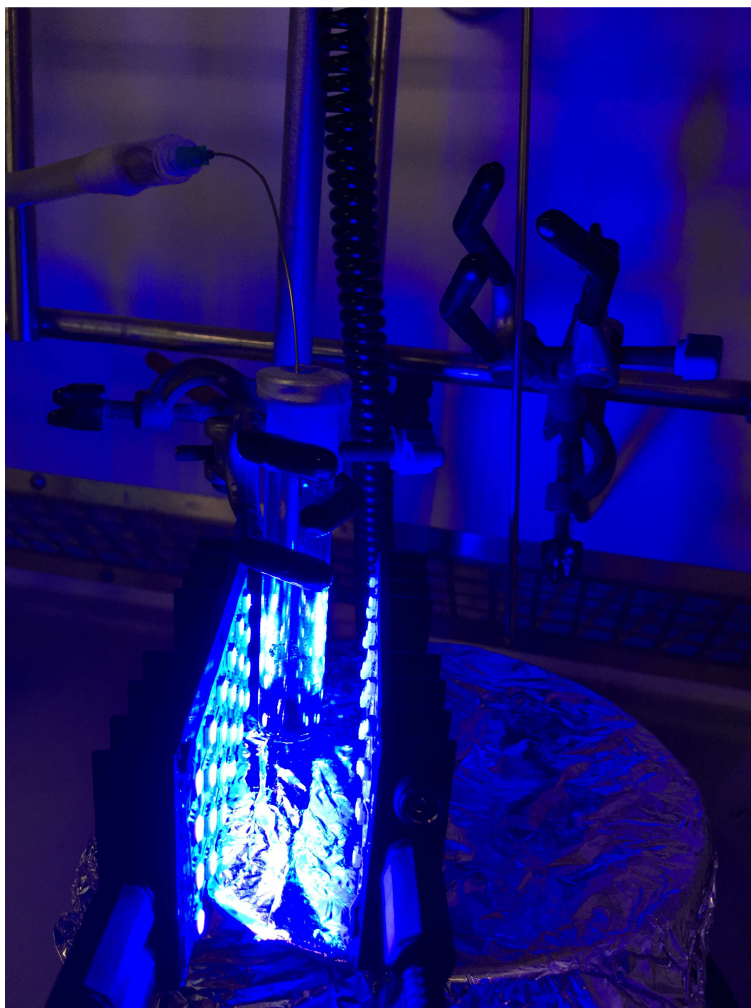

## 5 Reaction Products

### 5.1 Cascade Ring-Opening-Fluorination

#### General Procedure for the Reaction Optimization – GP9

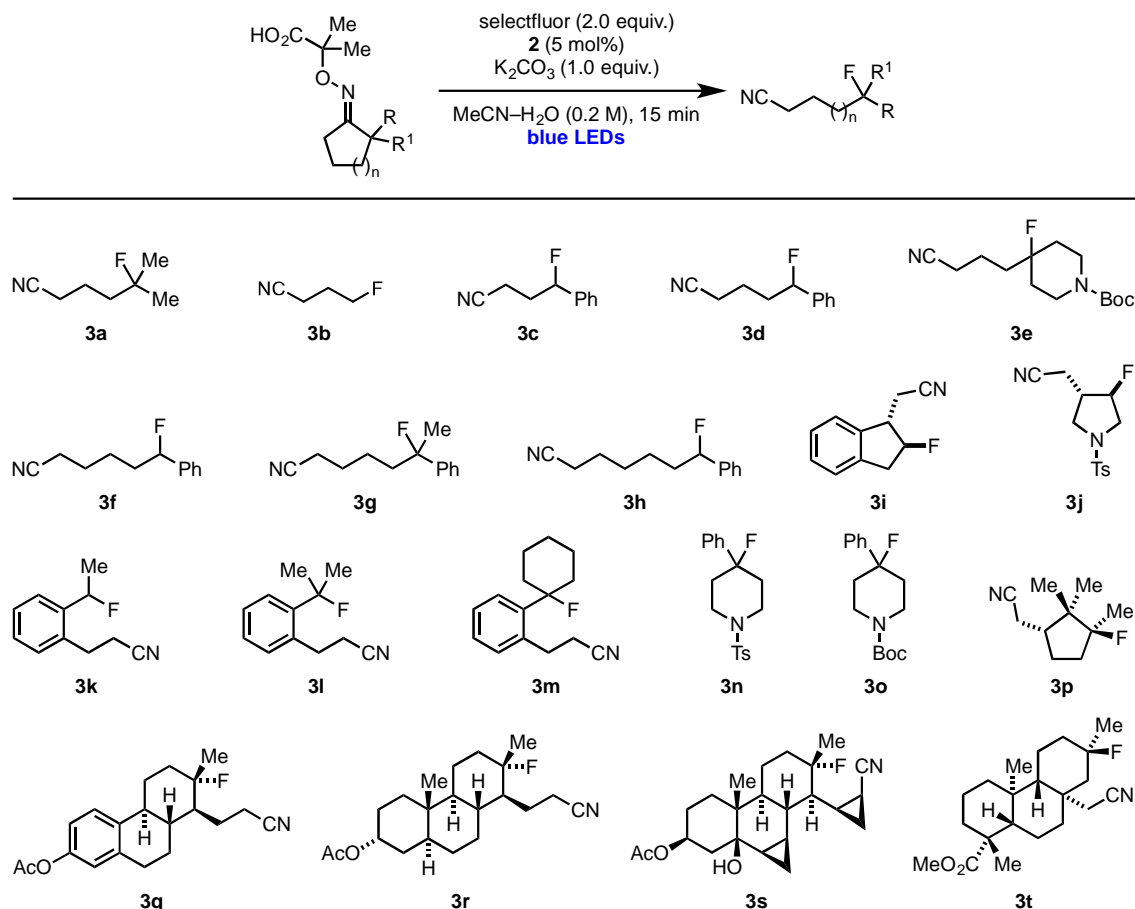

A dry tube equipped with a stirring bar was charged with the oxime (1.0 equiv.), **2** (5 mol%), K<sub>2</sub>CO<sub>3</sub> (0.1 mmol, 1.0 equiv.) and selectfluor (0.2 mmol, 2.0 equiv.). The tube was sealed, evacuated and back-filled with nitrogen three times. MeCN–H<sub>2</sub>O (1:1, 0.2 M) was added, the blue LEDs were switched on and the reaction was stirred under irradiation for 15 min. The mixture was dilute with H<sub>2</sub>O (1 mL) and EtOAc (1 mL). The layers were separated and the aqueous layer was extracted with EtOAc (3 x 5 mL). The combined organic layers were dried (MgSO<sub>4</sub>), filtered and evaporated. The residue was purified by column chromatography on silica gel.

### 5-Fluoro-5-methylhexanenitrile (3a)

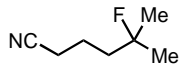

Following **GP9**, **1a** (19 mg, 0.1 mmol) gave **3a** (11 mg, 84%) as an oil.  $^1\text{H}$  NMR (400 MHz,  $\text{CDCl}_3$ )  $\delta$  2.40 (2H, t,  $J = 6.4$  Hz), 1.86–1.69 (4H, m), 1.37 (6H, d,  $J = 21.3$  Hz);  $^{19}\text{F}$  NMR (376 MHz,  $\text{CDCl}_3$ )  $\delta$  -140.0. Data in accordance with the literature.<sup>[14]</sup>

### 4-Fluoro-4-phenylbutanenitrile (3b)

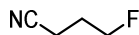

Following **GP9**, **1b** (17 mg, 0.1 mmol) gave **3b** (76%) as an oil.<sup>d</sup>  $^1\text{H}$  NMR (500 MHz,  $\text{CDCl}_3$ )  $\delta$  4.52 (2H, dt,  $J = 46.9, 5.5$  Hz), 2.49 (2H, t,  $J = 7.1$  Hz), 2.07–1.98 (2H, m);  $^{13}\text{C}$  NMR (126 MHz,  $\text{CDCl}_3$ )  $\delta$  118.6, 81.2 (d,  $J = 167.3$  Hz), 47.4, 26.2 (H, d,  $J = 20.5$  Hz), 13.2 (H, d,  $J = 5.3$  Hz);  $^{19}\text{F}$  NMR ( $\text{CDCl}_3$ , 376 MHz)  $\delta$  -222.8.

### 4-Fluoro-4-phenylbutanenitrile (3c)

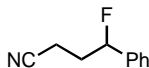

Following **GP9**, **1c** (12 mg, 0.05 mmol) gave **3c** (6 mg, 68%).  $^1\text{H}$  NMR (500 MHz,  $\text{CDCl}_3$ )  $\delta$  7.47–7.22 (5H, m), 5.51 (1H, ddd,  $J = 47.6, 8.6, 3.9$  Hz), 2.55–2.05 (4H, m);  $^{13}\text{C}$  NMR (126 MHz,  $\text{CDCl}_3$ )  $\delta$  138.3, 129.1, 128.9, 125.4, 119.0, 92.2 (d,  $J = 173.5$  Hz), 33.6, 13.5;  $^{19}\text{F}$  NMR (471 MHz,  $\text{CDCl}_3$ )  $\delta$  -179.6. Data in accordance with the literature.<sup>[15]</sup>

### 5-Fluoro-5-phenylpentanenitrile (3d)

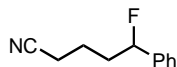

Following **GP9**, **1d** (13 mg, 0.05 mmol) gave **3d** (6 mg, 68%) as an oil.  $^1\text{H}$  NMR (500 MHz,  $\text{CDCl}_3$ )  $\delta$  7.43 – 7.30 (5H, m), 5.49 (1H, ddd,  $J = 47.8, 8.1, 4.2$  Hz), 2.49–2.34 (2H, m), 2.18–1.95 (2H, m), 1.94–1.72 (2H, m);  $\delta$   $^{13}\text{C}$  NMR (100 MHz,  $\text{CDCl}_3$ )  $\delta$  16.9, 21.2 (d,  $J = 3.8$  Hz), 35.8 (d,  $J = 23.8$  Hz), 93.5 (d,  $J = 172.2$  Hz), 119.2, 125.2 (d,  $J = 6.7$  Hz), 128.5 (d,  $J = 1.9$  Hz), 128.6, 139.4 (d,  $J = 20.0$  Hz);  $^{19}\text{F}$  NMR (471 MHz,  $\text{CDCl}_3$ )  $\delta$  -176.9. Data in accordance with the literature.<sup>[16]</sup>

<sup>d</sup> As **3b** is volatile, the reaction was performed in  $\text{CD}_3\text{CN}-\text{D}_2\text{O}$  and after 15 min under blue LEDs irradiation, a solution of 1,3-(MeO)<sub>3</sub>-C<sub>6</sub>H<sub>3</sub> in  $\text{CDCl}_3$  was added and the yield calculated by crude  $^1\text{H}$  NMR analysis.

### **tert-Butyl 4-(3-Cyanopropyl)-4-fluoropiperidine-1-carboxylate (3e)**

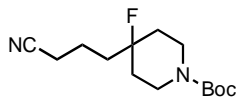

Following **GP9**, **1e** (35 mg, 0.1 mmol) gave **3e** (10 mg, 35%) as an oil. FT-IR  $\nu_{\max}$  (film)/ $\text{cm}^{-1}$  3013, 2947, 1689, 1427, 1352, 1244, 997, 908, 732;  $^1\text{H}$  NMR (400 MHz,  $\text{CDCl}_3$ )  $\delta$  3.94 (2H, br s), 3.06 (2H, br s), 2.40 (2H, t,  $J = 6.7$  Hz), 1.87–1.75 (5H, m), 1.75–1.68 (1H, m), 1.54–1.42 (2H, m), 1.46 (9H, s);  $^{13}\text{C}$  NMR (126 MHz,  $\text{CDCl}_3$ )  $\delta$  154.7, 119.3, 93.4 (d,  $J = 172.2$  Hz), 79.7, 39.0 (d,  $J = 22.3$  Hz), 34.5 (d,  $J = 13.9$  Hz), 29.7, 28.4, 19.0, 17.4;  $^{19}\text{F}$  NMR (376 MHz,  $\text{CDCl}_3$ )  $\delta$  -164.2; HRMS (ASAP) Found  $\text{MNa}^+$  293.1625,  $\text{C}_{14}\text{H}_{23}\text{O}_2\text{N}_2\text{FNa}$  requires 293.1636.

### **6-Fluoro-6-phenylhexanenitrile (3f)**

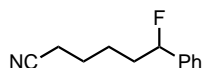

Following **GP9**, **1f** (28 mg, 0.1 mmol) gave **3f** (12 mg, 61%) as an oil. FT-IR  $\nu_{\max}$  (film)/ $\text{cm}^{-1}$  2253, 1375, 1038, 917, 735;  $^1\text{H}$  NMR (400 MHz,  $\text{CDCl}_3$ )  $\delta$  7.42–7.34 (3H, m), 7.32 (2H, d,  $J = 7.8$  Hz), 5.44 (1H, ddd,  $J = 47.7, 8.1, 4.6$  Hz), 2.36 (2H, t,  $J = 7.0$  Hz), 2.08–1.78 (2H, m), 1.78–1.53 (4H, m);  $^{13}\text{C}$  NMR (101 MHz,  $\text{CDCl}_3$ )  $\delta$  139.9 (d,  $J = 19.9$  Hz), 128.6, 128.4 (d,  $J = 1.8$  Hz), 125.4 (d,  $J = 6.9$  Hz), 119.5, 94.1 (d,  $J = 171.4$  Hz), 36.4 (d,  $J = 23.9$  Hz), 25.3, 24.4 (d,  $J = 4.1$  Hz), 17.1;  $^{19}\text{F}$  NMR (376 MHz,  $\text{CDCl}_3$ )  $\delta$  -175.4; HRMS (ESI) Found  $\text{MNa}^+$  214.0998,  $\text{C}_{12}\text{H}_{14}\text{NFNa}$  requires 214.1002.

### **6-Fluoro-6-phenylheptanenitrile (3g)**

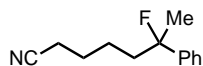

Following **GP9**, **1g** (29 mg, 0.1 mmol) gave **3g** (13 mg, 63%) as an oil. FT-IR  $\nu_{\max}$  (film)/ $\text{cm}^{-1}$  3019, 1352, 1214, 1028, 864, 550;  $^1\text{H}$  NMR (400 MHz,  $\text{CDCl}_3$ )  $\delta$  7.40–7.34 (2H, m), 7.33–7.27 (3H, m), 2.28 (2H, t,  $J = 7.1$  Hz), 2.01–1.96 (1H, m), 1.96–1.89 (1H, m), 1.66 (3H, d,  $J = 21.5$  Hz), 1.60–1.45 (2H, m), 1.38–1.24 (2H, m);  $^{13}\text{C}$  NMR (101 MHz,  $\text{CDCl}_3$ )  $\delta$  144.3 (d,  $J = 22.0$  Hz), 128.3, 127.3, 123.9 (d,  $J = 9.9$  Hz), 119.6, 97.4 (d,  $J = 173.1$  Hz), 41.2 (d,  $J = 24.1$  Hz), 27.9 (d,  $J = 25.3$  Hz), 25.5, 23.0 (d,  $J = 3.7$  Hz), 17.08;  $^{19}\text{F}$  NMR (376 MHz,  $\text{CDCl}_3$ )  $\delta$  -149.6; HRMS (ESI) Found  $\text{MNa}^+$  228.1156,  $\text{C}_{13}\text{H}_{16}\text{NFNa}$  requires 228.1159.



### 7-Fluoro-7-phenylheptanenitrile (3h)

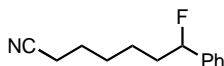

Following **GP9**, **1h** (29 mg, 0.1 mmol) gave **3h** (15 mg, 72%) as an oil. FT-IR  $\nu_{\max}$  (film)/ $\text{cm}^{-1}$  2950, 2400, 1450, 904, 725, 649;  $^1\text{H}$  NMR (400 MHz,  $\text{CD}_3\text{Cl}$ )  $\delta$  7.41–7.36 (2H, m), 7.35–7.30 (3H, m), 5.43 (1H, ddd,  $J = 47.8, 8.1, 4.7$  Hz), 2.34 (2H, t,  $J = 7.0$  Hz), 2.06–1.75 (3H, m), 1.71–1.63 (2H, m), 1.55–1.38 (5H, m);  $^{13}\text{C}$  NMR (126 MHz,  $\text{CDCl}_3$ )  $\delta$  140.2 (d,  $J = 19.7$  Hz), 128.5, 128.3 (d,  $J = 2.1$  Hz), 125.4 (d,  $J = 6.9$  Hz), 119.6, 94.3 (d,  $J = 170.9$  Hz), 36.9 (d,  $J = 23.8$  Hz), 29.7, 28.4, 25.3, 24.3 (d,  $J = 4.4$  Hz), 17.1;  $^{19}\text{F}$  NMR (376 MHz,  $\text{CDCl}_3$ )  $\delta$  -175.2; HRMS (ESI) Found  $\text{MNa}^+$  228.1160,  $\text{C}_{13}\text{H}_{16}\text{NFNa}$  requires 228.1159.

### 2-(2-Fluoro-2,3-dihydro-1H-inden-1-yl)acetonitrile (3i)

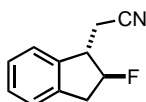

Following **GP9**, **1i** (26 mg, 0.1 mmol) gave **3i** (11 mg, 62%) as an oil. dr: 4:1. FT-IR  $\nu_{\max}$  (film)/ $\text{cm}^{-1}$  2360, 1474, 1433, 1072, 870, 661;  $^1\text{H}$  NMR (400 MHz,  $\text{CDCl}_3$ , diastereomers)  $\delta$  7.33–7.22 (4H, m), 5.55–5.37 (0.2H, m), 5.20 (0.8H, ddt,  $J = 52.4, 6.3, 3.8$  Hz), 3.63 (0.8H, dtd,  $J = 22.0, 6.6, 3.8$  Hz), 3.58–3.50 (0.2H, m), 3.43–3.28 (1H, m), 3.27–3.09 (1H, m), 2.86–2.73 (0.4H, m), 2.67 (1.6H, d,  $J = 6.7$  Hz);  $^{13}\text{C}$  NMR (101 MHz,  $\text{CDCl}_3$ , diastereomers)  $\delta$  139.9<sup>m</sup>, 139.9<sup>m</sup>, 139.5<sup>M</sup>, 139.1<sup>M</sup>, 128.8<sup>M</sup>, 128.5<sup>m</sup>, 127.9<sup>M</sup>, 127.6<sup>m</sup>, 125.4<sup>M</sup>, 125.4<sup>m</sup>, 124.2<sup>M</sup>, 123.7<sup>m</sup>, 117.9<sup>M</sup>, 97.6 (d,  $J = 183.9$  Hz)<sup>M</sup>, 94.9 (H, d,  $J = 184.4$  Hz)<sup>m</sup>, 47.8 (d,  $J = 24.0$  Hz)<sup>M</sup>, 46.0 (d,  $J = 19.4$  Hz)<sup>m</sup>, 38.9 (d,  $J = 22.8$  Hz)<sup>m</sup>, 38.2 (d,  $J = 22.6$  Hz)<sup>M</sup>, 20.4 (d,  $J = 6.5$  Hz)<sup>M</sup>, 16.3 (d,  $J = 13.6$  Hz)<sup>m</sup>;  $^{19}\text{F}$  NMR (376 MHz,  $\text{CDCl}_3$ )  $\delta$  -176.88<sup>M</sup>, -193.86<sup>m</sup>. HRMS (ESI) Found  $\text{MNa}^+$  176.081,  $\text{C}_{11}\text{H}_{10}\text{NFNa}$  requires 176.0876.

### 2-(4-Fluoro-1-tosylpyrrolidin-3-yl)acetonitrile (3j)

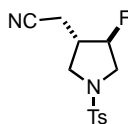

Following **GP9**, **1j** (19 mg, 0.1 mmol) gave **3j** (12 mg, 44%) as an oil. dr: 3.4:1. FT-IR  $\nu_{\max}$  (film)/ $\text{cm}^{-1}$  2360, 1264, 1017, 908, 730, 704, 561;  $^1\text{H}$  NMR (500 MHz,  $\text{CDCl}_3$ , diastereomers)  $\delta$  7.65 (1.4H, d,  $J = 8.3$  Hz) & 7.64 (0.6H, d,  $J = 8.3$  Hz), 7.29 (1.4H, d,  $J = 8.3$  Hz) & 7.29 (0.6H, d,  $J = 8.3$  Hz), 5.08–4.94 (0.3H, m) & 4.88 (0.7H, ddt,  $J = 6.8, 4.3, 2.0$  Hz), 3.69 (0.3H, dd,  $J = 9.6, 7.4$  Hz), 3.65–3.55 (0.7H, m), 3.47–3.34 (0.7H, m), 3.25–3.19

(1.7H, m), 2.95–2.88 (0.3H, m), 2.67–2.57 (0.7H, m), 2.49–2.39 (0.3H, m), 2.40–2.36 (0.3H, M), 2.38 (3H, s), 2.27 (1.7H, dd,  $J = 7.7, 4.7$  Hz);  $^{13}\text{C}$  NMR (126 MHz,  $\text{CDCl}_3$ , diastereomers)  $\delta$  144.7<sup>M</sup>, 144.6<sup>m</sup>, 133.6<sup>m</sup>, 133.1<sup>M</sup>, 130.4<sup>M</sup>, 130.3<sup>m</sup>, 128.0<sup>M</sup>, 127.9<sup>m</sup>, 117.4<sup>M</sup>, 117.0<sup>m</sup>, 94.15 (d,  $J = 184.8$  Hz)<sup>M</sup>, 92.3 (d,  $J = 184.2$  Hz)<sup>m</sup>, 54.4 (d,  $J = 23.1$  Hz)<sup>m</sup>, 52.6 (d,  $J = 24.8$  Hz)<sup>M</sup>, 50.4<sup>M</sup>, 50.0<sup>m</sup>, 41.8 (d,  $J = 23.2$  Hz)<sup>M</sup>, 40.8 (d,  $J = 19.4$  Hz)<sup>m</sup>, 22.0, 18.6 (d,  $J = 8.4$  Hz)<sup>M</sup>, 15.0 (d,  $J = 9.0$  Hz)<sup>m</sup>;  $^{19}\text{F}$  NMR (376 MHz,  $\text{CDCl}_3$ )  $\delta$  -174.5<sup>M</sup>, -192.4<sup>m</sup>; HRMS (ESI) Found  $\text{MNa}^+$  305.0730,  $\text{C}_{13}\text{H}_{15}\text{O}_2\text{N}_2\text{FNaS}$  requires 305.0730.

### 3-(2-(1-Fluoroethyl)phenyl)propanenitrile (3k)

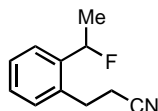

Following **GP9**, **1k** (26 mg, 0.1 mmol) gave **3k** (8 mg, 46%) as an oil. FT-IR  $\nu_{\text{max}}$  (film)/ $\text{cm}^{-1}$  2360, 1264, 907, 729, 704, 650;  $^1\text{H}$  NMR ( $\text{CDCl}_3$ , 500 MHz)  $\delta$  7.43 (1H, d,  $J = 6.5$  Hz), 7.37–7.30 (2H, m), 7.27 (1H, d,  $J = 6.3$  Hz), 5.83 (1H, dq,  $J = 47.2, 6.4$  Hz), 3.12–2.97 (2H, m), 2.71–2.57 (2H, m), 1.71 (3H, dd,  $J = 23.6, 6.4$  Hz);  $^{13}\text{C}$  NMR ( $\text{CDCl}_3$ , 126 MHz)  $\delta$  138.8 (d,  $J = 18.4$  Hz), 136.2 (d,  $J = 3.2$  Hz), 130.3, 129.4 (d,  $J = 2.3$  Hz), 128.1, 126.6 (d,  $J = 6.8$  Hz), 119.5, 88.9 (d,  $J = 166.1$  Hz), 28.7, 22.2 (d,  $J = 25.4$  Hz), 19.6 (d,  $J = 3.0$  Hz);  $^{19}\text{F}$  NMR (376 MHz,  $\text{CDCl}_3$ )  $\delta$  -163.6 (s); HRMS (APCI) Found  $\text{MK}^+$  216.0585,  $\text{C}_{11}\text{H}_{12}\text{NFK}$  requires 216.0591.

### 3-(2-(2-Fluoropropan-2-yl)phenyl)propanenitrile (3l)

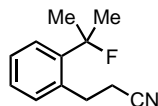

Following **GP9**, **1l** (28 mg, 0.1 mmol) gave **3l** (13 mg, 70%) as an oil.  $^1\text{H}$  NMR (400 MHz,  $\text{CDCl}_3$ )  $\delta$  7.35 (1H, d,  $J = 7.6$  Hz), 7.29–7.24 (1H, m), 7.21–7.17 (2H, m), 3.13–3.07 (2H, m), 2.72–2.66 (2H, m), 1.44 (6H, s);  $^{19}\text{F}$  NMR (376 MHz,  $\text{CDCl}_3$ )  $\delta$  -134.10 (s); HRMS (ESI) Found  $\text{MNH}_4^+$  209.1448,  $\text{C}_{12}\text{H}_{18}\text{FN}_2$  requires 209.1454. Data in accordance with the literature.<sup>[17]</sup>

### 3-(2-(1-Fluorocyclohexyl)phenyl)propanenitrile (**3m**)

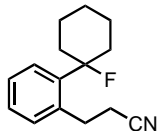

Following **GP9**, **1m** (32 mg, 0.1 mmol) gave **3m** (13 mg, 56%) as an oil.  $^1\text{H}$  NMR (400 MHz,  $\text{CDCl}_3$ )  $\delta$  7.37–7.29 (2H, m), 7.07–7.11 (2H, m), 3.10 (2H, m), 2.56 (2H, t,  $J = 7.5$  Hz), 1.83–1.60 (10H, m);  $^{19}\text{F}$  NMR (376 MHz,  $\text{CDCl}_3$ )  $\delta$  -157.7. Data in accordance with the literature.<sup>[17]</sup>

### 4-Fluoro-4-phenyl-1-tosylpiperidine (**3n**)

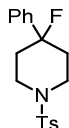

Following **GP9**, **1n** (46 mg, 0.1 mmol) gave **3n** (20 mg, 60%) as a solid. FT-IR  $\nu_{\text{max}}$  (film)/ $\text{cm}^{-1}$  3382, 2952, 1175, 954, 650, 633;  $^1\text{H}$  NMR (400 MHz,  $\text{CDCl}_3$ )  $\delta$  7.69 (2H, d,  $J = 7.9$  Hz), 7.40–7.28 (7H, m), 3.82 (2H, dd,  $J = 11.4, 3.9$  Hz), 2.69 (2H, t,  $J = 11.6$  Hz), 2.46 (3H, s), 2.25 (1H, td,  $J = 13.6, 4.8$  Hz), 2.15 (1H, td,  $J = 13.6, 4.8$  Hz), 2.03 (2H, t,  $J = 11.8$  Hz);  $^{13}\text{C}$  NMR (126 MHz,  $\text{CDCl}_3$ )  $\delta$  143.8, 143.27 (d,  $J = 21.2$  Hz), 133.1, 129.8, 128.5, 128.0, 127.7, 123.7 (d,  $J = 9.3$  Hz), 93.2 (d,  $J = 175.1$  Hz), 42.3 (d,  $J = 1.2$  Hz), 36.2 (d,  $J = 22.5$  Hz), 21.57;  $^{19}\text{F}$  NMR (376 MHz,  $\text{CDCl}_3$ )  $\delta$  -162.4; HRMS (ESI) Found  $\text{MNa}^+$  356.1078,  $\text{C}_{18}\text{H}_{20}\text{O}_2\text{NFNaS}$  requires 356.1091.

### *tert*-Butyl 4-Fluoro-4-phenylpiperidine-1-carboxylate (**3o**)

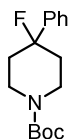

Following **GP9**, **1o** (40 mg, 0.1 mmol) gave **3o** (18 mg, 64%) as an oil. FT-IR  $\nu_{\text{max}}$  (film)/ $\text{cm}^{-1}$  3314, 2343, 1022, 667, 620;  $^1\text{H}$  NMR (500 MHz,  $\text{CDCl}_3$ )  $\delta$  7.41–7.35 (4H, m), 7.34–7.28 (1H, m), 4.12 (2H, br s), 3.18 (2H, br s), 2.07–1.89 (4H, m), 1.49 (9H, s);  $^{13}\text{C}$  NMR (126 MHz,  $\text{CDCl}_3$ )  $\delta$  154.8, 144.1 (d,  $J = 21.4$  Hz), 128.4 (d,  $J = 0.7$  Hz), 127.7 (d,  $J = 1.1$  Hz), 123.9 (d,  $J = 9.2$  Hz), 94.3 (d,  $J = 174.5$  Hz), 79.7, 36.9, 36.6, 28.5;  $^{19}\text{F}$  NMR (376 MHz,  $\text{CDCl}_3$ )  $\delta$  -162.7; HRMS (ESI) Found  $\text{MNa}^+$  302.1515,  $\text{C}_{16}\text{H}_{22}\text{O}_2\text{NFNa}$  requires 302.1513.

### 2-((1*R*,3*S*)-3-Fluoro-2,2,3-trimethylcyclopentyl)acetonitrile (**3p**)

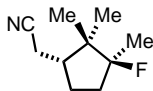

Following **GP9**, **1p** (25 mg, 0.1 mmol) gave **3p** (12 mg, 68%) as an oil. dr: 4:1.

Data for major diastereomer:  $^1\text{H}$  NMR (500 MHz,  $\text{CDCl}_3$ )  $\delta$  2.43–2.34 (2H, m), 2.25–2.20 (1H, m), 2.19–2.10 (1H, m), 2.03–1.79 (2H, m), 1.46–1.36 (1H, m), 1.30 (3H, d,  $J = 22.2$  Hz), 1.02 (3H, d,  $J = 1.4$  Hz), 0.70 (3H, s);  $^{13}\text{C}$  NMR (126 MHz,  $\text{CDCl}_3$ ) 119.4, 96.6 (d,  $J = 171.5$  Hz), 43.2, 34.9 (d,  $J = 24.0$  Hz), 26.5, 19.1, 19.0, 18.77 (d,  $J = 26.4$  Hz), 18.31 (d,  $J = 5.8$  Hz), 17.8;  $^{19}\text{F}$  NMR (376 MHz,  $\text{CDCl}_3$ )  $\delta$  -143.1; HRMS (ESI) Found  $\text{MH}^+$  170.1335,  $\text{C}_{10}\text{H}_{17}\text{NF}$  requires 170.1340. Data in accordance with literature.<sup>[17]</sup>

### (4*bS*,7*S*,8*S*,8*aR*)-8-(2-Cyanoethyl)-7-fluoro-7-methyl-4*b*,5,6,7,8,8*a*,9,10-octahydrophenanthren-2-yl Acetate (**3q**)

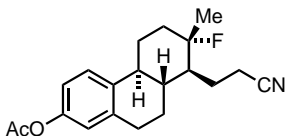

Following **GP9**, **1q** (41 mg, 0.1 mmol) gave **3q** (24 mg, 72%) as an oil. dr 1.3:1.  $^1\text{H}$  NMR (400 MHz,  $\text{CDCl}_3$ )  $\delta$  7.28 (1H, d,  $J = 8.5$  Hz), 6.85 (1H, d,  $J = 8.5$  Hz), 6.80 (1H, s), 2.62–2.54 (2H, m), 2.44–2.36 (2H, m), 2.28 (3H, s), 2.14–2.05 (2H, m), 1.99–1.86 (4H, m), 1.66–1.58 (2H, m), 1.57–1.41 (1H, m), 1.32 (3H, d,  $J = 22.4$  Hz), 1.23–1.09 (2H, m);  $^{19}\text{F}$  NMR (376 MHz,  $\text{CDCl}_3$ )  $\delta$  -130.2, -159.5; HRMS (ESI) Found  $\text{MH}^+$  170.1335,  $\text{C}_{10}\text{H}_{17}\text{NF}$  requires 170.1340. Data in accordance with the literature.<sup>[17]</sup>

### (2*R*,4*aS*,4*bS*,7*S*,8*S*,8*aR*)-8-(2-Cyanoethyl)-7-fluoro-4*a*,7-dimethyltetradecahydrophenanthren-2-yl Acetate (**3r**)

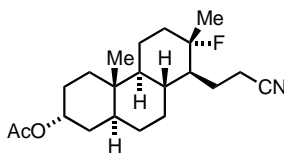

Following **GP9**, **1r** (43 mg, 0.1 mmol) gave **3r** (18 mg, 52%) as an oil. dr 3:1. FT-IR  $\nu_{\text{max}}$  (film)/ $\text{cm}^{-1}$  2995, 1266, 1174, 1130, 986, 951;  $^1\text{H}$  NMR (400 MHz,  $\text{CDCl}_3$ )  $\delta$  4.68–4.56 (1H, m), 2.51–2.32<sup>M</sup> (1.6H, m), 2.30–2.19<sup>m</sup> (0.4H, m), 1.89–1.81 (2H, m), 1.81–1.73 (2H, m), 1.72–1.65 (2H, m), 1.61–1.52 (2H, m), 1.49–1.37 (m, 2H), 1.37–1.06 (12H, m), 1.04–0.88 (3H, m), 0.73<sup>m</sup> (0.8H, s), 0.69<sup>M</sup> (2.2H, s);  $^{13}\text{C}$  NMR (126 MHz,  $\text{CDCl}_3$ )<sup>b</sup>  $\delta$  170.7<sup>m</sup>, 170.7<sup>M</sup>,

120.3<sup>m</sup>, 120.2<sup>M</sup>, 98.4<sup>M</sup> (d,  $J = 169.7$  Hz), 96.2<sup>m</sup> (d,  $J = 170.5$  Hz), 73.5<sup>m</sup>, 73.3<sup>M</sup>, 52.7<sup>M</sup>, 52.5<sup>m</sup>, 50.6<sup>M</sup> (d,  $J = 17.0$  Hz), 49.0<sup>m</sup> (d,  $J = 21.0$  Hz), 43.9<sup>m</sup>, 43.9<sup>M</sup>, 39.4 (d,  $J = 9.3$  Hz), 39.1<sup>M</sup> (d,  $J = 21.1$  Hz), 38.4<sup>m</sup> (d,  $J = 22.4$  Hz), 36.6<sup>M</sup>, 36.6<sup>m</sup>, 35.6 (d,  $J = 16.4$  Hz), 35.5, 34.9, 33.7<sup>m</sup>, 33.6<sup>M</sup>, 31.4<sup>M</sup>, 31.2<sup>m</sup>, 28.3<sup>M</sup>, 28.2<sup>m</sup>, 27.3<sup>M</sup>, 27.3<sup>m</sup>, 25.9<sup>m</sup> (d,  $J = 24.9$  Hz), 24.4<sup>M</sup>, 23.1<sup>m</sup>, 22.6<sup>M</sup> (d,  $J = 12.4$  Hz), 21.5<sup>m</sup>, 21.4<sup>M</sup>, 20.2<sup>M</sup>, 20.2<sup>m</sup>, 19.3<sup>M</sup> (d,  $J = 25.4$  Hz), 17.5<sup>M</sup> (d,  $J = 6.5$  Hz), 14.7<sup>m</sup> (d,  $J = 5.6$  Hz), 12.1<sup>m</sup>, 12.0<sup>M</sup>; <sup>19</sup>F NMR (376 MHz, CDCl<sub>3</sub>)  $\delta$  -129.5<sup>M</sup>, -159.6<sup>m</sup>; HRMS (ESI) Found MNa<sup>+</sup> 372.2301, C<sub>21</sub>H<sub>32</sub>O<sub>2</sub>NFNa requires 372.2309.

**(1*bR*,3*S*,5*aR*,5*bS*,8*S*,9*S*,9*aR*)-9-((1*S*)-2-Cyanocyclopropyl)-8-fluoro-1*b*-hydroxy-5*a*,8-dimethyltetradecahydro-1*H*-cyclopropa[*I*]phenanthren-3-yl Acetate (**3s**)**

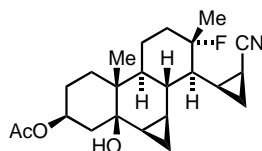

Following **GP9**, **1s** (47 mg, 0.1 mmol) gave **3s** (20 mg, 51%) as an oil. dr 3:1.

Data for the major isomer: FT-IR  $\nu_{\max}$  (film)/cm<sup>-1</sup> 2925, 1728, 1249, 905, 729, 649; <sup>1</sup>H NMR (400 MHz, CDCl<sub>3</sub>)  $\delta$  5.08–5.02 (1H, m), 2.21 (1H, dd,  $J = 14.3, 4.3$  Hz), 2.07 (3H, s), 1.98–1.92 (2H, m), 1.80–1.70 (1H, m), 1.52–1.42 (2H, m), 1.46 (3H, d,  $J = 21.5$  Hz), 1.42–1.37 (2H, m), 1.23–1.14 (1H, m), 1.13–1.06 (2H, m), 1.03–0.97 (1H, m), 0.95 (3H, s), 0.91–0.77 (3H, m), 0.74–0.64 (2H, m); <sup>13</sup>C NMR (126 MHz, CDCl<sub>3</sub>)  $\delta$  170.1, 121.7, 96.2 (d,  $J = 171.9$  Hz), 71.9, 70.8, 53.4, 50.3 (d,  $J = 20.7$  Hz), 41.7, 40.7, 39.1, 38.7 (d,  $J = 21.9$  Hz), 29.7, 26.8 (d,  $J = 25.5$  Hz), 25.1, 22.1, 21.5, 20.3 (d,  $J = 2.6$  Hz), 17.7, 14.2, 13.7, 10.3, 3.1; <sup>19</sup>F NMR (376 MHz, CDCl<sub>3</sub>)  $\delta$  -161.5; HRMS (ESI) Found MNa<sup>+</sup> 412.2247, C<sub>23</sub>H<sub>32</sub>O<sub>3</sub>NFNa requires 412.2258.

**Methyl (1*R*,4*as*,4*br*,7*R*,8*ar*)-8*a*-(Cyanomethyl)-7-fluoro-1,4*a*,7-trimethyltetradecahydrophenanthrene-1-carboxylate (**3t**)**

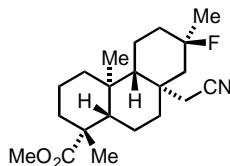

Following **GP9**, **1t** (43 mg, 0.1 mmol) gave **3t** (11 mg, 32%) as an oil. FT-IR  $\nu_{\max}$  (film)/cm<sup>-1</sup> 2970, 2923, 1711, 1360, 1260, 1220, 1090, 1023, 917, 917, 802, 731; <sup>1</sup>H NMR (500 MHz, CDCl<sub>3</sub>)  $\delta$  3.65 (3H, s), 2.90 (1H, d,  $J = 15.2$  Hz), 2.65 (1H, d,  $J = 0.4$  Hz), 2.28 (1H, ddd,  $J = 15.1, 9.0, 2.5$  Hz), 2.21–2.12 (2H, m,  $J = 6.5$  Hz), 2.08–1.98 (2H, m), 1.92–1.36 (7H, m),

1.32 (3H, d,  $J = 21.3$  Hz), 1.18 (3H, s), 1.14–0.80 (6H, m), 0.62 (3H, s);  $^{13}\text{C}$  NMR (126 MHz,  $\text{CDCl}_3$ )  $\delta$  177.6, 119.6, 95.3, 57.33, 56.9, 51.5, 49.5 (d,  $J = 20.3$  Hz), 43.9, 40.2, 39.9, 38.1, 38.1 (d,  $J = 23.2$  Hz), 37.6, 36.7, 28.7, 28.2 (d,  $J = 25.2$  Hz), 21.7 (d,  $J = 9.1$  Hz), 19.28, 19.1, 17.3, 14.1;  $^{19}\text{F}$  NMR (471 MHz,  $\text{CDCl}_3$ )  $\delta$  -144.87; HRMS (ESI) Found  $\text{MNa}^+$  372.2309,  $\text{C}_{21}\text{H}_{32}\text{O}_2\text{NFNa}$  requires 372.2315.

## 5.2 Cascade Ring-Opening-Chlorination

### General Procedure for the Reaction Optimization – GP10

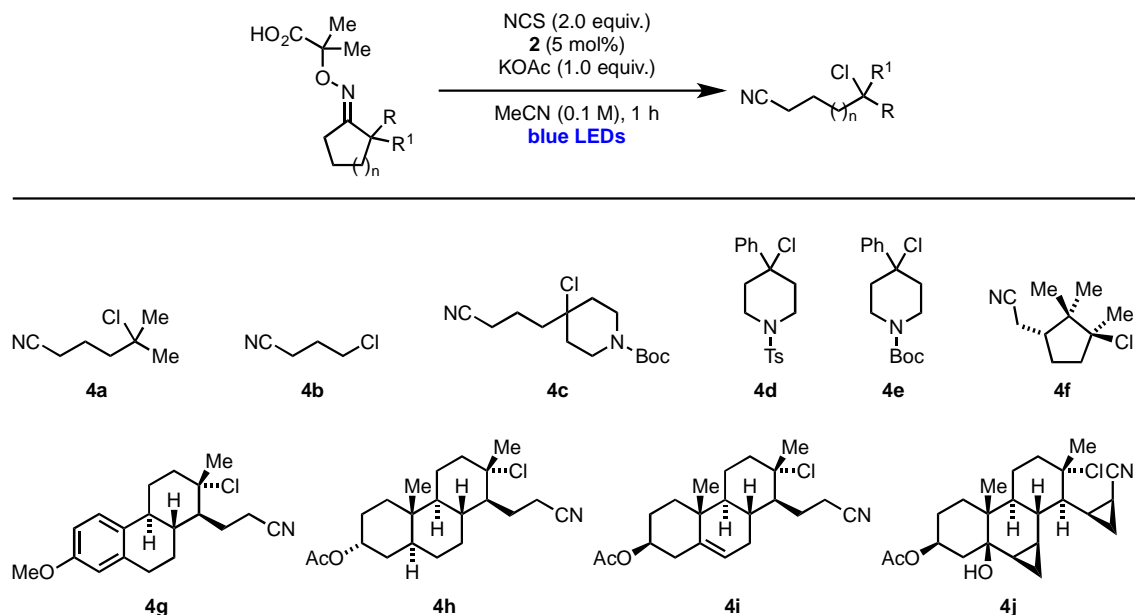

A dry tube equipped with a stirring bar was charged with the oxime (1.0 equiv.), **2** (5 mol%), KOAc (0.1 mmol, 1.0 equiv.) and NCS (0.2 mmol, 2.0 equiv.). The tube was sealed, evacuated and back-filled with nitrogen three times. MeCN (0.1 M) was added, the blue LEDs were switched on and the reaction was stirred under irradiation for 1 h. The mixture was dilute with H<sub>2</sub>O (1 mL) and EtOAc (1 mL). The layers were separated and the aqueous layer was extracted with EtOAc (3 x 5 mL). The combined organic layers were dried (MgSO<sub>4</sub>), filtered and evaporated. The residue was purified by column chromatography on silica gel.

#### 5-Chloro-5-methylhexanenitrile (**4a**)

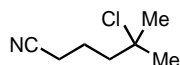

Following **GP10**, **1a** (21 mg, 0.1 mmol) gave **4a** (14 mg, 94%) as an oil. FT-IR  $\nu_{\max}$  (film)/cm<sup>-1</sup> 2924, 1372, 957; <sup>1</sup>H NMR (400 MHz, CDCl<sub>3</sub>)  $\delta$  2.43–2.38 (2H, m), 1.92–1.84 (4H, m), 1.60 (6H, s); <sup>13</sup>C NMR (126 MHz, CDCl<sub>3</sub>)  $\delta$  119.4, 69.6, 44.6, 32.5, 21.3, 17.2; HRMS (ASAP) Found MH<sup>+</sup> 146.0727, C<sub>7</sub>H<sub>13</sub>NCl requires 146.07321.

#### 4-Chlorobutanenitrile (**4b**)

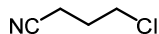

Following **GP10**, **1b** (17 mg, 0.1 mmol) gave **4b** (6 mg, 59%) as an oil.  $^1\text{H}$  NMR (500 MHz,  $\text{CD}_3\text{CN}$ )  $\delta$  3.73–3.66 (2H, m), 2.61–2.55 (4H, m);  $^{13}\text{C}$  NMR (126 MHz,  $\text{CD}_3\text{CN}$ )  $\delta$  119.6, 44.2, 28.7, 15.2. Data in accordance with a commercially available sample [CAS: 628-20-6].

#### *tert*-Butyl 4-Chloro-4-(3-cyanopropyl)piperidine-1-carboxylate (**4c**)

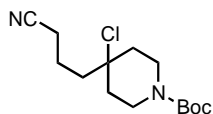

Following **GP10**, **1e** (35 mg, 0.1 mmol) gave **4c** (14 mg, 50%) as an oil. FT-IR  $\nu_{\text{max}}$  (film)/ $\text{cm}^{-1}$  3055, 2986, 1264, 908, 731, 704;  $^1\text{H}$  NMR (400 MHz,  $\text{CDCl}_3$ )  $\delta$  3.92 (2H, br s), 3.07 (2H, br s), 2.36 (2H, t,  $J = 6.1$  Hz), 1.88–1.81 (5H, m), 1.79 (1H, br s), 1.62–1.52 (2H, m), 1.39 (9H, s);  $^{13}\text{C}$  NMR (126 MHz,  $\text{CDCl}_3$ )  $\delta$  154.9, 119.6, 80.2, 72.3, 44.6, 40.6, 39.8, 28.8, 20.3, 17.7; HRMS (ESI) Found  $\text{MNa}^+$  309.1340,  $\text{C}_{14}\text{H}_{23}\text{O}_2\text{N}_2\text{ClNa}$  requires 309.1340.

#### 4-Chloro-4-phenyl-1-tosylpiperidine (**4d**)

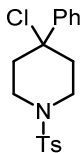

Following **GP10**, **1n** (46 mg, 0.1 mmol) gave **4d** (25 mg, 71%) as a solid. FT-IR  $\nu_{\text{max}}$  (film)/ $\text{cm}^{-1}$  2950, 2250, 1711, 1541, 1374, 1346, 1248, 1163, 1045, 904, 723, 648;  $^1\text{H}$  NMR (400 MHz,  $\text{CDCl}_3$ )  $\delta$  7.70 (2H, d,  $J = 7.8$  Hz), 7.50 (2H, d,  $J = 7.7$  Hz), 7.40–7.29 (5H, m), 3.86–3.81 (2H, m), 2.96–2.86 (2H, m), 2.46 (3H, s), 2.37–2.28 (4H, m);  $^{13}\text{C}$  NMR (101 MHz,  $\text{CDCl}_3$ )  $\delta$  144.5, 143.8, 133.3, 129.8, 128.6, 127.7, 125.3, 125.0, 70.9, 42.7, 38.9, 21.6; HRMS (ESI) Found  $\text{MNa}^+$  372.0783,  $\text{C}_{18}\text{H}_{20}\text{O}_2\text{NClNaS}$  required 372.0795.

#### *tert*-Butyl 4-Chloro-4-phenylpiperidine-1-carboxylate (**4e**)

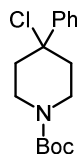

Following **GP10**, **1o** (40 mg, 0.1 mmol) gave **4e** (19 mg, 66%) as an oil. FT-IR  $\nu_{\text{max}}$  (film)/ $\text{cm}^{-1}$  3320, 2295, 1113, 954, 830, 679;  $^1\text{H}$  NMR (400 MHz,  $\text{CDCl}_3$ )  $\delta$  7.59–7.51 (2H, m), 7.39 (2H, t,  $J = 7.5$  Hz), 7.31 (1H, t,  $J = 7.4$  Hz), 4.10 (2H, br. s), 3.35 (2H, br.s), 2.33–



2.26 (2H, m), 2.18–2.07 (2H, m), 1.47 (9H, s);  $^{13}\text{C}$  NMR (126 MHz,  $\text{CDCl}_3$ )  $\delta$  145.1, 128.5, 128.1, 125.4, 71.9, 28.5.

### 2-((1*R*,3*S*)-3-Chloro-2,2,3-trimethylcyclopentyl)acetonitrile (**4f**)

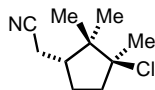

Following **GP10**, **1p** (25 mg, 0.1 mmol) gave **4f** (13 mg, 69%) as an oil. dr: 4:1.

Data for major diastereomer: FT-IR  $\nu_{\text{max}}$  (film)/ $\text{cm}^{-1}$  2950, 2400, 2310, 1475, 903, 724;  $^1\text{H}$  NMR (500 MHz,  $\text{CDCl}_3$ )  $\delta$  2.66–2.58 (1H, m), 2.41–2.34 (1H, m), 2.29–2.19 (3H, m), 2.11–2.03 (1H, m), 1.58 (3H, s), 1.49–1.41 (1H, m), 1.13 (3H, s), 0.80 (3H, s);  $^{13}\text{C}$  NMR (126 MHz,  $\text{CDCl}_3$ )  $\delta$  119.3, 86.0, 48.8, 43.3, 40.2, 26.6, 25.1, 22.1, 18.7, 18.3; HRMS (APCI) Found  $\text{MH}^+$  186.1040,  $\text{C}_{10}\text{H}_{17}\text{NCl}$  requires 186.1044.

### 3-((1*S*,2*S*,4*aS*,10*aR*)-2-Chloro-7-methoxy-2-methyl-1,2,3,4,4*a*,9,10,10*a*-octahydrophenanthren-1-yl)propanenitrile (**4g**)

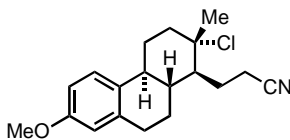

Following **GP10**, **1v** (39 mg, 0.1 mmol) gave **4g** (17 mg, 53%) as an oil. FT-IR  $\nu_{\text{max}}$  (film)/ $\text{cm}^{-1}$  2963, 1201, 1145, 957, 811, 752;  $^1\text{H}$  NMR (400 MHz,  $\text{CDCl}_3$ )  $\delta$  7.21 (1H, d,  $J = 8.6$  Hz), 6.73 (1H, d,  $J = 8.3$  Hz), 6.63 (1H, s), 3.78 (3H, s), 2.94–2.84 (2H, m), 2.65–2.49 (1H, m), 2.47–2.27 (3H, m), 2.26–2.08 (2H, m), 2.07–1.97 (1H, m), 1.88–1.72 (3H, m), 1.69 (3H, s), 1.73–1.61 (1H, m), 1.58–1.38 (2H, m);  $^{13}\text{C}$  NMR (126 MHz,  $\text{CDCl}_3$ )  $\delta$  157.7, 137.4, 131.4, 126.6, 119.7, 113.4, 112.0, 75.1, 55.2, 51.8, 42.7, 42.7, 41.6, 32.0, 30.2, 26.8, 26.7, 25.5, 18.2; HRMS (ASAP) Found  $\text{MH}^+$  318.1619,  $\text{C}_{19}\text{H}_{25}\text{ONCl}$  requires 318.1619.

### (2*R*,4*aS*,4*bS*,7*S*,8*S*,8*aR*)-7-Chloro-8-(2-cyanoethyl)-4*a*,7-dimethyltetradecahydrophenanthren-2-yl Acetate (**4h**)

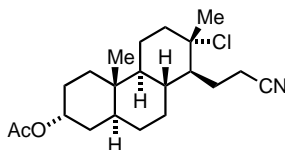

Following **GP10**, **1r** (43 mg, 0.1 mmol) gave **4h** (31 mg, 87%) as an oil. FT-IR  $\nu_{\text{max}}$  (film)/ $\text{cm}^{-1}$  2972, 2925, 1295, 1154, 1130, 952, 815;  $^1\text{H}$  NMR (400 MHz,  $\text{CDCl}_3$ )  $\delta$  4.75–4.63 (1H, m), 2.58–2.46 (1H, m), 2.38–2.29 (1H, m), 2.10–2.03 (2H, m), 2.02 (3H, s), 1.90–

1.74 (3H, m), 1.70–1.57 (4H, m), 1.61 (3H, s), 1.52–1.13 (8H, m), 1.07–0.93 (3H, m), 0.82 (3H, s);  $^{13}\text{C}$  NMR (126 MHz,  $\text{CDCl}_3$ )  $\delta$  170.7, 119.7, 92.9, 75.5, 73.4, 52.9, 52.6, 44.0, 42.5, 38.3, 36.5, 35.7, 33.7, 31.9, 31.3, 28.3, 27.3, 25.9, 21.5, 21.0, 18.0, 12.1; HRMS (ESI) Found  $\text{MNa}^+$  388.2001,  $\text{C}_{21}\text{H}_{32}\text{O}_2\text{NCINa}$  requires 388.2014.

**(2*S*,4*aR*,4*bS*,7*S*,8*S*,8*aR*)-7-Chloro-8-(2-cyanoethyl)-4*a*,7-dimethyl-1,2,3,4,4*a*,4*b*,5,6,7,8,8*a*,9-dodecahydrophenanthren-2-yl Acetate (**4i**)**

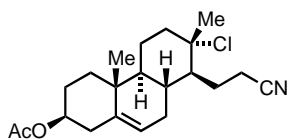

Following **GP10**, **1s** (43 mg, 0.1 mmol) gave **4i** (23 mg, 62%) as an oil. dr 4:1. FT-IR  $\nu_{\text{max}}$  (film)/ $\text{cm}^{-1}$  2969, 2929, 1466, 1378, 1306, 1160, 1128, 950, 816;  $^1\text{H}$  NMR (500 MHz,  $\text{CDCl}_3$ )  $\delta$  5.38 (1H, d,  $J = 5.2$  Hz), 4.64–4.57 (1H, m), 2.60–2.52 (1H, m), 2.44–2.36 (1H, m), 2.36–2.27 (2H, m), 2.24–2.15 (1H, m), 2.14–2.04 (2H, m), 2.04 (3H, s), 1.92–1.84 (2H, m), 1.80–1.65 (4H, m), 1.62 (3H, s), 1.65–1.58 (2H, m), 1.17–1.05 (4H, m), 1.03 (3H, s), 0.91–0.80 (2H, m);  $^{13}\text{C}$  NMR (126 MHz,  $\text{CDCl}_3$ )  $\delta$  170.5, 139.5, 121.3, 119.7, 75.3, 73.5, 48.7, 44.0, 37.6, 37.0, 36.9, 36.7, 32.3, 29.7, 27.5, 26.6, 23.4, 22.7, 21.4, 19.2, 18.7; HRMS (ASAP neg) Found  $\text{M-H}^+$  362.1883,  $\text{C}_{21}\text{H}_{29}\text{ClNO}_2$  requires 362.1892.

**(1*aS*,1*bR*,3*S*,5*aR*,5*bS*,8*S*,9*S*,9*aR*,9*bS*)-8-Chloro-9-((1*S*)-2-cyanocyclopropyl)-1*b*-hydroxy-5*a*,8-dimethyltetradecahydro-1*H*-cyclopropa[1]phenanthren-3-yl Acetate (**4j**)**

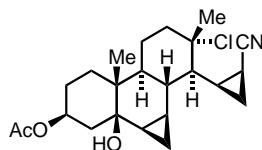

Following **GP10**, **1t** (47 mg, 0.1 mmol) gave **4j** (16 mg, 40%) as an oil. dr 3:1. FT-IR  $\nu_{\text{max}}$  (film)/ $\text{cm}^{-1}$  1710, 1357, 12220, 917, 731, 532;  $^1\text{H}$  NMR (400 MHz,  $\text{CDCl}_3$ )  $\delta$  5.04 (1H, s), 2.24–2.14 (2H, m), 2.10–2.02 (1H, m), 2.07 (3H, s), 1.98–1.87 (2H, m), 1.69–1.58 (4H, m), 1.61 (3H, s), 1.52–1.39 (2H, m), 1.38–1.16 (2H, m), 1.16–0.95 (4H, m), 0.92 (3H, s), 0.91–0.77 (2H, m), 0.74–0.64 (1H, m), 0.64–0.58 (1H, m);  $^{13}\text{C}$  NMR (101 MHz,  $\text{CDCl}_3$ )  $\delta$  170.2, 121.4, 75.0, 72.0, 70.8, 53.1, 45.4, 42.4, 42.0, 40.7, 29.8, 25.3, 25.0, 24.6, 21.8, 21.6, 17.7, 14.9, 12.2, 10.2, 4.0, 3.7; HRMS (ESI) Found  $\text{MK}^+$  444.1702,  $\text{C}_{23}\text{H}_{32}\text{O}_3\text{NClK}$  requires 444.1702.

### 5.3 Cascade Ring Opening-Azidation

#### General Procedure for the Reaction Optimization – GP11

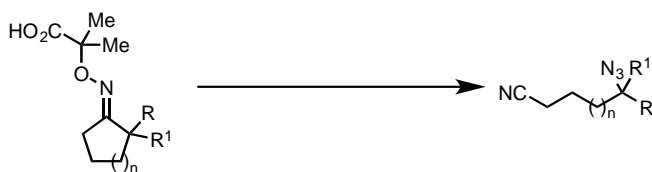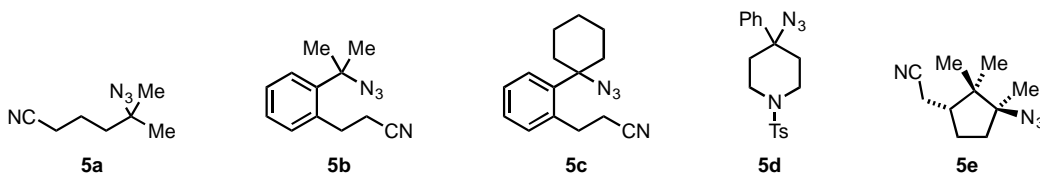

A dry tube equipped with a stirring bar was charged with the oxime (1.0 equiv.), **2** (5 mol%), Cs<sub>2</sub>CO<sub>3</sub> (0.1 mmol, 1.0 equiv.) and 2,4,6-triisopropylbenzenesulfonyl azide (0.2 mmol, 2.0 equiv.). The tube was sealed, evacuated and back-filled with nitrogen three times. CH<sub>2</sub>Cl<sub>2</sub> (0.5 M) was added, the blue LEDs were switched on and the reaction was stirred under irradiation for 1 h. The mixture was dilute with H<sub>2</sub>O (1 mL) and EtOAc (1 mL). The layers were separated and the aqueous layer was extracted with EtOAc (3 x 5 mL). The combined organic layers were dried (MgSO<sub>4</sub>), filtered and evaporated. The residue was purified by column chromatography on silica gel.

#### 5-Azido-5-methylhexanenitrile (**5a**)

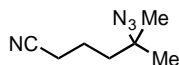

Following **GP11**, **1a** (21 mg, 0.1 mmol) gave **5a** (10 mg, 64%) as an oil. <sup>1</sup>H NMR (400 MHz, CDCl<sub>3</sub>) δ 2.45 (2H, t, *J* = 7.5 Hz), 1.78 – 1.76 (2H, m), 1.52 (2H, t, *J* = 6.8 Hz), 1.07 (6H, s); <sup>13</sup>C NMR (126 MHz, CDCl<sub>3</sub>) δ 117.7, 64.7, 34.7, 29.5, 26.7, 25.1; HRMS (ESI) found MH<sup>+</sup> 153.1132, C<sub>7</sub>H<sub>13</sub>N<sub>4</sub> requires 153.1135.

#### 3-(2-(2-Azidopropan-2-yl)phenyl)propanenitrile (**5b**)

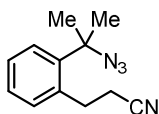

Following **GP11**, **11** (28 mg, 0.1 mmol) gave **5b** (11 mg, 52%) as an oil. <sup>1</sup>H NMR (400 MHz, CDCl<sub>3</sub>) δ 7.43 (1H, d, *J* = 7.9 Hz), 7.29–7.24 (2H, m), 7.10 (1H, d, *J* = 7.1 Hz), 2.88 (2H, t, *J* = 6.9 Hz), 2.59 (2H, t, *J* = 6.2 Hz), 1.60 (6H, s); <sup>13</sup>C NMR (101 MHz, CDCl<sub>3</sub>) δ 154.8, 136.2, 127.4, 126.8, 126.0, 125.6, 124.1, 66.8, 29.9, 24.8, 23.5.

### 3-(2-(1-Azidocyclohexyl)phenyl)propanenitrile (**5c**)

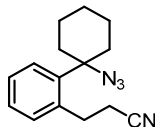

Following **GP11**, **1m** (32 mg, 0.1 mmol) gave **5c** (16 mg, 63%) as an oil. FT-IR  $\nu_{\max}$  (film)/ $\text{cm}^{-1}$  2947, 2830, 1451, 1022, 757;  $^1\text{H}$  NMR (500 MHz,  $\text{CDCl}_3$ )  $\delta$  7.30 (1H, d,  $J = 7.9$  Hz), 7.26–7.23 (2H, m), 7.22–7.17 (1H, m), 3.33–3.26 (2H, m), 2.60–2.54 (2H, m), 1.76–1.59 (10H, m);  $^{13}\text{C}$  NMR (126 MHz,  $\text{CDCl}_3$ )  $\delta$  141.9, 137.5, 131.5, 128.2, 127.2, 126.4, 119.4, 66.7, 35.9, 29.7, 25.2, 22.3, 19.5; HRMS (ESI) Found  $\text{MNa}^+$  277.1414,  $\text{C}_{15}\text{H}_{18}\text{N}_4\text{Na}$  requires 277.1424.

### 4-Azido-4-phenyl-1-tosylpiperidine (**5d**)

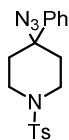

Following **GP11** but using HFIP as the solvent, **1n** (46 mg, 0.1 mmol) gave **5d** (23 mg, 64%) as a solid. FT-IR  $\nu_{\max}$  (film)/ $\text{cm}^{-1}$  2979, 2334, 1161, 730, 620;  $^1\text{H}$  NMR (400 MHz,  $\text{CDCl}_3$ )  $\delta$  7.68 (2H, d,  $J = 8.2$  Hz), 7.42–7.39 (3H, m), 7.37–7.27 (4H, m), 3.77–3.67 (2H, m), 2.79–2.67 (2H, m), 2.45 (3H, s), 2.30–2.22 (2H, m), 2.21–2.08 (2H, m);  $^{13}\text{C}$  NMR (126 MHz,  $\text{CDCl}_3$ )  $\delta$  143.6, 142.6, 133.1, 129.8, 129.0, 128.3, 127.7, 125.2, 81.7, 42.1, 32.9, 21.6; HRMS (ESI) Found  $\text{MNa}^+$  379.1199,  $\text{C}_{18}\text{H}_{20}\text{O}_2\text{N}_4\text{NaS}$  requires 379.1199.

### 2-(3-Azido-2,2,3-trimethylcyclopentyl)acetonitrile (**5e**)

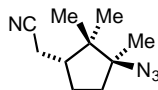

Following **GP11**, **1p** (25 mg, 0.1 mmol) gave **5e** (17 mg, 86%) as an oil. FT-IR  $\nu_{\max}$  (film)/ $\text{cm}^{-1}$  2966, 2102, 1266, 1089, 757;  $^1\text{H}$  NMR (500 MHz,  $\text{CDCl}_3$ )  $\delta$  2.38–2.28 (2H, m), 2.23–2.16 (1H, m), 2.16–2.06 (1H, m), 1.95 (1H, ddd,  $J = 14.0, 9.7, 4.0$  Hz), 1.81 (1H, ddd,  $J = 14.4, 11.8, 6.2$  Hz), 1.47–1.37 (1H, m), 1.30 (3H, s), 0.97 (3H, s), 0.73 (3H, s);  $^{13}\text{C}$  NMR (126 MHz,  $\text{CDCl}_3$ )  $\delta$  119.3, 75.4, 47.0, 43.3, 33.8, 26.5, 20.2, 18.3, 18.0, 17.9; HRMS (ESI): Found  $\text{MNa}^+$  215.1266,  $\text{C}_{10}\text{H}_{16}\text{N}_4\text{Na}$  requires 215.1267.

## 5.4 Cascade 1,5-H Abstraction-Chlorination

### General Procedure for the Reaction Optimization – GP12

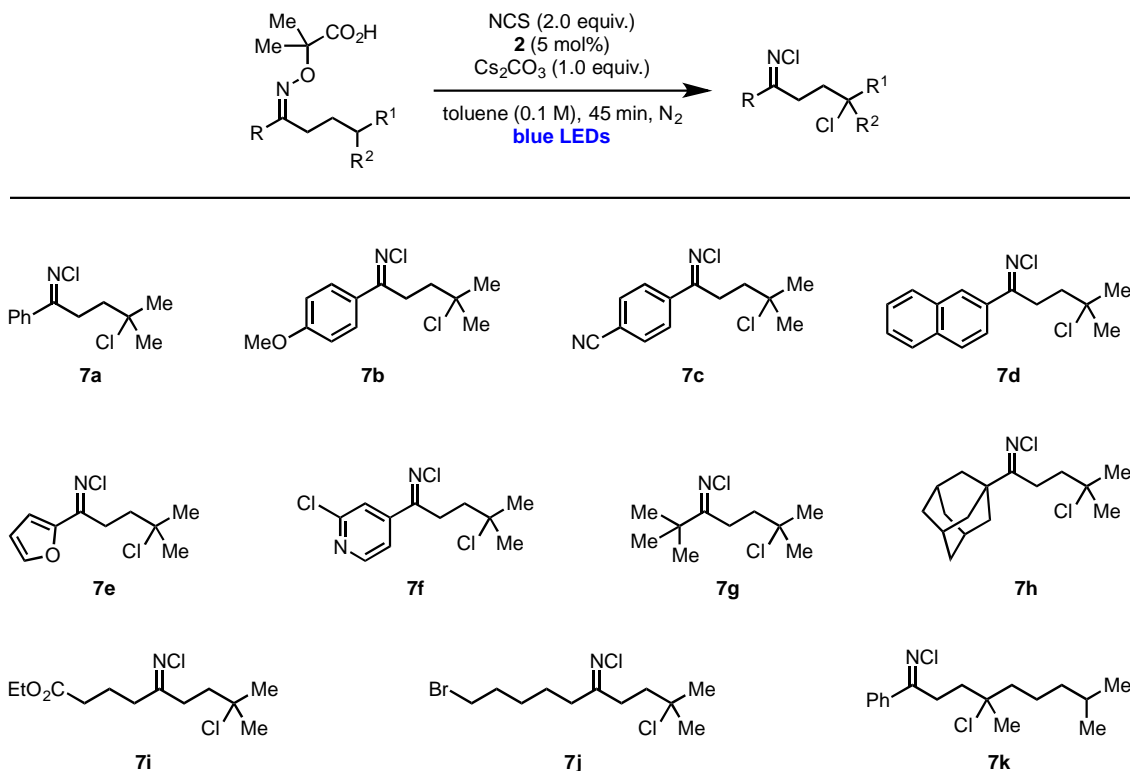

A dry tube equipped with a stirring bar was charged with the oxime (1.0 equiv.), **2** (5 mol%), Cs<sub>2</sub>CO<sub>3</sub> (0.1 mmol, 1.0 equiv.) and NCS (0.2 mmol, 2.0 equiv.). The tube was sealed, evacuated and back-filled with nitrogen three times. Toluene (0.1 M) was added, the blue LEDs were switched on and the reaction was stirred under irradiation for 45 min. The mixture was dilute with H<sub>2</sub>O (1 mL) and EtOAc (1 mL). The layers were separated and the aqueous layer was extracted with EtOAc (3 x 5 mL). The combined organic layers were dried (MgSO<sub>4</sub>), filtered and evaporated. The residue was purified by column chromatography on silica gel.

#### *N*,4-Dichloro-4-methyl-1-phenylpentan-1-imine (**7a**)

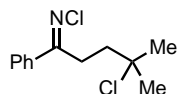

Following **GP12**, **6a** (27 mg, 0.1 mmol) gave **7a** (17 mg, 69%) as an oil. FT-IR  $\nu_{\text{max}}$  (film)/cm<sup>-1</sup> 2962, 1652, 1444, 1295, 978, 898, 763, 663; <sup>1</sup>H NMR (400 MHz, CDCl<sub>3</sub>)  $\delta$  7.77–7.73 (2H, m), 7.48–7.40 (3H, m), 3.34–3.26 (2H, m), 2.06–1.98 (2H, m), 1.67 (6H, s); <sup>13</sup>C NMR (101 MHz, CDCl<sub>3</sub>)  $\delta$  179.6, 136.0, 131.2, 129.0, 127.3, 70.1, 41.2, 32.4, 29.9; HRMS (APCI) Found MH<sup>+</sup> 244.0646, C<sub>12</sub>H<sub>16</sub>NCl<sub>2</sub> required 244.0654.

### ***N*,4-Dichloro-1-(4-methoxyphenyl)-4-methylpentan-1-imine (7b)**

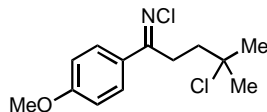

Following **GP12**, **6b** (31 mg, 0.1 mmol) gave **7b** (19 mg, 70%) as an oil. FT-IR  $\nu_{\max}$  (film)/ $\text{cm}^{-1}$  2955, 1651, 1603, 1473, 1292, 979, 679;  $^1\text{H}$  NMR (400 MHz,  $\text{CDCl}_3$ )  $\delta$  7.74 (2H, d,  $J = 9.4$  Hz), 6.93 (2H, d,  $J = 9.4$  Hz), 3.85 (3H, s), 3.30–3.22 (2H, m), 2.04–1.97 (2H, m), 1.67 (6H, s);  $^{13}\text{C}$  NMR (101 MHz,  $\text{CDCl}_3$ )  $\delta$  178.4, 161.9, 128.8, 128.2, 114.1, 70.1, 55.4, 41.2, 32.3, 29.8; HRMS (APCI) Found  $\text{MH}^+$  274.0756,  $\text{C}_{13}\text{H}_{18}\text{ONCl}_2$  requires 274.0760.

### **4-(4-Chloro-1-(chloroimino)-4-methylpentyl)benzonitrile (7c)**

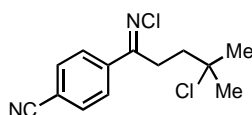

Following **GP12**, **6c** (30 mg, 0.1 mmol) gave **7c** (13 mg, 49%) as an oil. FT-IR  $\nu_{\max}$  (film)/ $\text{cm}^{-1}$  2956, 2879, 2229, 1650, 1279, 970, 781;  $^1\text{H}$  NMR (500 MHz,  $\text{CDCl}_3$ )  $\delta$  7.88 (2H, d,  $J = 8.5$  Hz), 7.73 (2H, d,  $J = 8.5$  Hz), 3.33–3.28 (2H, m), 2.01–1.97 (2H, m), 1.67 (6H, s);  $^{13}\text{C}$  NMR (126 MHz,  $\text{CDCl}_3$ )  $\delta$  178.2, 139.8, 132.7, 127.9, 118.2, 114.8, 69.9, 40.9, 32.4, 29.9; HRMS (APCI) Found  $\text{MH}^+$  269.0601,  $\text{C}_{13}\text{H}_{15}\text{N}_2\text{Cl}_2$  requires 269.0607.

### ***N*,4-Dichloro-4-methyl-1-(naphthalen-2-yl)pentan-1-imine (7d)**

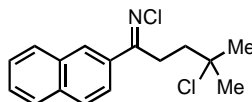

Following **GP12**, **6d** (33 mg, 0.1 mmol) gave **7d** (19 mg, 65%) as an oil. FT-IR  $\nu_{\max}$  (film)/ $\text{cm}^{-1}$  2967, 1656, 1442, 1153, 970, 754, 675;  $^1\text{H}$  NMR (500 MHz,  $\text{CDCl}_3$ )  $\delta$  8.22 (1H, br s), 7.94–7.90 (2H, m), 7.89–7.85 (2H, m), 7.55 (2H, tdd,  $J = 8.3, 5.1, 1.4$  Hz), 3.49–3.36 (2H, m), 2.14–2.04 (2H, m), 1.70 (6H, s);  $^{13}\text{C}$  NMR (126 MHz,  $\text{CDCl}_3$ )  $\delta$  179.2, 134.4, 133.0, 132.9, 129.1, 128.6, 127.8, 127.7, 127.7, 126.8, 123.7, 70.2, 41.2, 32.3, 29.9; HRMS (APCI) Found  $\text{MH}^+$  294.0799,  $\text{C}_{16}\text{H}_{18}\text{NCl}_2$  requires 294.0811.

### *N*,4-Dichloro-1-(furan-2-yl)-4-methylpentan-1-imine (**7e**)

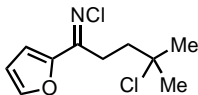

Following **GP12**, **6e** (27 mg, 0.1 mmol) gave **7e** (15 mg, 66%) as an oil. FT-IR  $\nu_{\max}$  (film)/ $\text{cm}^{-1}$  2955, 1661, 1399, 1170, 970, 668;  $^1\text{H}$  NMR (500 MHz,  $\text{CDCl}_3$ )  $\delta$  7.85 (1H, d,  $J = 3.7$  Hz), 7.57 (1H, d,  $J = 1.6$  Hz), 6.62 (1H, dd,  $J = 3.7, 1.7$  Hz), 3.18–3.13 (2H, m), 2.15–2.09 (2H, m), 1.64 (6H, s);  $^{13}\text{C}$  NMR (126 MHz,  $\text{CDCl}_3$ )  $\delta$  166.8, 146.4, 144.1, 120.3, 112.4, 69.9, 42.6, 33.5, 32.4; HRMS (ESI) Found  $\text{MH}^+$  234.0449,  $\text{C}_{10}\text{H}_{14}\text{ONCl}_2$  requires 234.0447.

### *N*,4-Dichloro-1-(2-chloropyridin-4-yl)-4-methylpentan-1-imine (**7f**)

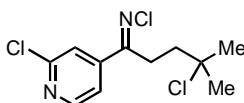

Following **GP12**, **6f** (31 mg, 0.1 mmol) gave **7f** (13 mg, 45%) as an oil.  $^1\text{H}$  NMR (400 MHz,  $\text{CDCl}_3$ )  $\delta$  8.49 (1H, dd,  $J = 5.2, 0.8$  Hz), 7.71–7.66 (1H, m), 7.55 (1H, dd,  $J = 5.2, 1.5$  Hz), 3.31–3.22 (2H, m), 2.02–1.94 (2H, m), 1.67 (6H, s);  $^{13}\text{C}$  NMR (101 MHz,  $\text{CDCl}_3$ )  $\delta$  176.9, 152.7, 150.5, 145.5, 121.9, 119.7, 69.6, 40.6, 32.2, 29.5.

### *N*,6-dichloro-2,2,6-trimethylheptan-3-imine (**7g**)

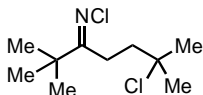

Following **GP12**, **6g** (27 mg, 0.1 mmol) gave **7g** (13 mg, 58%) as an oil. FT-IR  $\nu_{\max}$  (film)/ $\text{cm}^{-1}$  2986, 2870, 1642, 1474, 1215, 968, 672;  $^1\text{H}$  NMR (400 MHz,  $\text{CDCl}_3$ )  $\delta$  2.83–2.75 (2H, m), 2.08–2.01 (2H, m), 1.65 (6H, s), 1.16 (9H, s);  $^{13}\text{C}$  NMR (126 MHz,  $\text{CDCl}_3$ )  $\delta$  188.9, 70.7, 43.8, 40.8, 32.6, 29.3, 28.2; HRMS (APCI) Found  $\text{MH}^+$  224.0964,  $\text{C}_{10}\text{H}_{20}\text{NCl}_2$  requires 224.0967.

### 1-((3*r*,5*r*,7*r*)-Adamantan-1-yl)-*N*,4-dichloro-4-methylpentan-1-imine (**7h**)

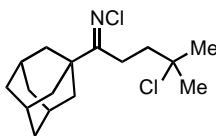

Following **GP12**, **6h** (33 mg, 0.1 mmol) gave **7h** (27 mg, 91%) as an oil. FT-IR  $\nu_{\max}$  (film)/ $\text{cm}^{-1}$  2895, 2850, 1646, 1295, 969, 920, 670;  $^1\text{H}$  NMR (500 MHz,  $\text{CDCl}_3$ )  $\delta$  2.78–2.74

(2H, m), 2.02–1.98 (2H, m), 1.87–1.85 (5H, m), 1.84–1.78 (2H, m), 1.72 (8H, m), 1.65 (6H, s);  $^{13}\text{C}$  NMR (126 MHz,  $\text{CDCl}_3$ )  $\delta$  188.3, 70.4, 45.6, 40.4, 39.9, 39.5, 36.9, 36.4, 32.2, 28.4, 28.1, 28.0; HRMS (ESI) Found  $\text{MH}^+$  268.1817,  $\text{C}_{16}\text{H}_{27}\text{NCl}$  requires 268.1827.

#### Ethyl-8-chloro-5-(chloroimino)-8-methylnonanoate (7i)

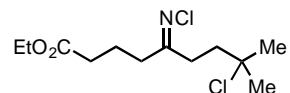

Following **GP12**, **6k** (32 mg, 0.1 mmol) gave **7i** (10 mg, 36%) as an oil. dr: 1.5:1. FT-IR  $\nu_{\text{max}}$  (film)/ $\text{cm}^{-1}$  2923, 2849, 1734, 1372, 1185, 730;  $^1\text{H}$  NMR (400 MHz,  $\text{CDCl}_3$ )  $\delta$  4.14–4.01 (2H, m), 2.65–2.60 (1H, m), 2.59–2.53 (1H, m), 2.42 (1H, t,  $J = 7.2$  Hz), 2.36–2.30 (2H, m), 2.25 (1H, t,  $J = 7.2$  Hz), 2.01–1.95 (1H, m), 1.91–1.85 (1H, m), 1.82 (1H, t,  $J = 7.3$  Hz), 1.53 (6H, s), 1.46–1.36 (1H, m), 1.16–1.10 (3H, m);  $\delta$   $^{13}\text{C}$  NMR (126 MHz,  $\text{CDCl}_3$ )  $\delta$  182.7, 172.6, 69.8, 60.6, 41.1, 35.0, 33.7, 32.4, 22.3, 20.7, 14.3; HRMS (APCI) Found  $\text{MH}^+$  282.1013,  $\text{C}_{12}\text{H}_{22}\text{O}_2\text{NCl}_2$  requires 282.1022.

#### 10-Bromo-N,2-dichloro-2-methyldecan-5-imine (7j)

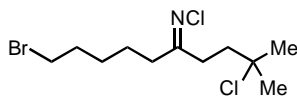

Following **GP12**, **6l** (35 mg, 0.1 mmol) gave **7j** (17 mg, 53%) as an oil. dr 1:1. FT-IR  $\nu_{\text{max}}$  (film)/ $\text{cm}^{-1}$  2925, 2854, 1711, 1461, 1371, 907, 731, 668;  $^1\text{H}$  NMR (500 MHz,  $\text{CDCl}_3$ )  $\delta$  3.45–3.38 (2H, m), 2.79–2.75 (0.5H, m), 2.70–2.65 (1H, m), 2.62–2.57 (1H, m), 2.48 (0.5H, t,  $J = 7.6$  Hz), 2.43 (0.5H, t,  $J = 7.3$  Hz), 2.41–2.37 (0.5H, m), 2.06–2.01 (1H, m), 1.98–1.82 (3H, m), 1.70–1.57 (2H, m), 1.55 (6H, s), 1.53–1.39 (2H, m);  $^{13}\text{C}$  NMR (126 MHz,  $\text{CDCl}_3$ )  $\delta$  183.2, 183.1, 69.9, 69.7, 42.4, 41.2, 41.0, 40.4, 38.6, 35.6, 34.6, 33.6, 33.5, 33.4, 32.7, 32.6, 32.5, 32.3, 32.2, 31.6, 28.1, 27.8, 27.7, 27.7, 25.0, 24.5, 22.9, 22.4; HRMS (APCI) Found  $\text{MH}^+$  316.0223,  $\text{C}_{11}\text{H}_{21}\text{NBrCl}_2$  requires 316.0229.

#### N,4-Dichloro-4,8-dimethyl-1-phenylnonan-1-imine (7k)

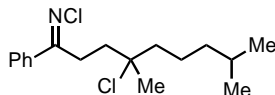

Following **GP12**, **6q** (35 mg, 0.1 mmol) gave **7k** (11 mg, 34%) as an oil. FT-IR  $\nu_{\text{max}}$  (film)/ $\text{cm}^{-1}$  2950, 2250, 903, 723, 650;  $^1\text{H}$  NMR (500 MHz,  $\text{CDCl}_3$ )  $\delta$  7.62–7.32 (5H, m), 3.31–3.22 (2H, m), 2.09–1.94 (2H, m), 1.88–1.73 (2H, m), 1.61 (3H, s), 1.51–1.40 (2H, m),



1.24–1.16 (3H, m), 0.89 (6H, d,  $J = 6.6$  Hz);  $^{13}\text{C}$  NMR (126 MHz,  $\text{CDCl}_3$ )  $\delta$  132.9, 131.1, 129.6, 128.8, 128.4, 127.1, 73.9, 44.2, 39.2, 39.1, 39.0, 29.7, 29.5, 28.0, 24.7, 22.6; HRMS (APCI) Found  $\text{MH}^+$  314.1440,  $\text{C}_{17}\text{H}_{26}\text{NCl}_2$  requires 314.1437.

## 5.5 Cascade 1,5-H Abstraction-Fluorination

### General Procedure for the Reaction Optimization – GP13

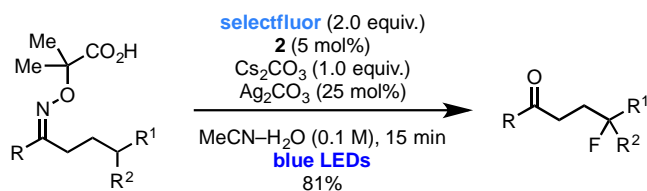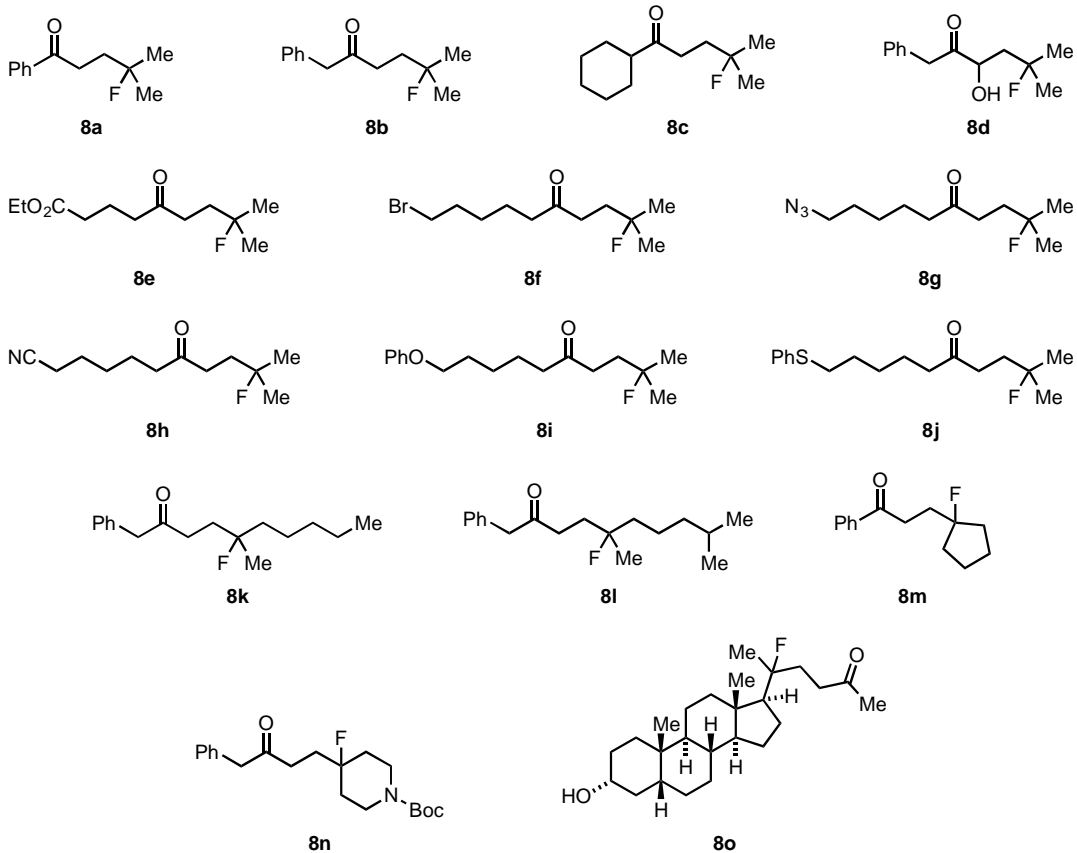

A dry tube equipped with a stirring bar was charged with the oxime (1.0 equiv.), **2** (5 mol%), Cs<sub>2</sub>CO<sub>3</sub> (0.1 mmol, 1.0 equiv.), Ag<sub>2</sub>CO<sub>3</sub> (25 mol%) and selectfluor (0.2 mmol, 2.0 equiv.). The tube was sealed, evacuated and back-filled with nitrogen three times. CH<sub>3</sub>CN–H<sub>2</sub>O (1:1, 0.1 M) was added, the blue LEDs were switched on and the reaction was stirred under irradiation for 15 min. The mixture was dilute with H<sub>2</sub>O (1 mL) and EtOAc (1 mL). The layers were separated and the aqueous layer was extracted with EtOAc (3 x 5 mL). The combined organic layers were dried (MgSO<sub>4</sub>), filtered and evaporated. The residue was purified by column chromatography on silica gel.

#### 4-Fluoro-4-methyl-1-phenylpentan-1-one (**8a**)

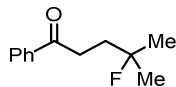

Following **GP13**, **6a** (28 mg, 0.1 mmol) gave **8a** (16 mg, 81%) as an oil.  $^1\text{H}$  NMR (500 MHz,  $\text{CDCl}_3$ )  $\delta$  8.01–7.95 (2H, m), 7.64–7.29 (3H, m), 3.13 (2H, t,  $J = 7.7$  Hz), 2.08 (2H, dt,  $J = 21.3, 7.7$  Hz), 1.41 (6H, d,  $J = 21.3$  Hz);  $^{19}\text{F}$  NMR (376 MHz,  $\text{CDCl}_3$ )  $\delta$  –140.9. Data in accordance with the literature.<sup>[18]</sup>

#### 4-Fluoro-4-methyl-1-phenylpentan-1-one (**8b**)

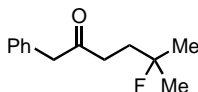

Following **GP13**, **6i** (29 mg, 0.1 mmol) gave **8b** (18 mg, 88%) as an oil. FT-IR  $\nu_{\text{max}}$  (film)/ $\text{cm}^{-1}$  2292, 2253, 1440, 1374, 1271, 1038, 918, 735, 703;  $^1\text{H}$  NMR (400 MHz,  $\text{CDCl}_3$ )  $\delta$  7.35–7.31 (2H, m), 7.30–7.24 (1H, m), 7.21 (2H, d,  $J = 7.6$  Hz), 3.72 (2H, s), 2.60 (2H, t,  $J = 7.7$  Hz), 1.88 (2H, dt,  $J = 21.3, 7.7$  Hz), 1.30 (6H, d,  $J = 21.3$  Hz);  $^{13}\text{C}$  NMR ( $\text{CDCl}_3$ , 101 MHz)  $\delta$  207.8, 134.3, 129.5, 128.9, 127.2, 95.0 (d,  $J = 165.8$  Hz), 50.3, 36.6 (d,  $J = 3.7$  Hz), 34.7 (d,  $J = 22.7$  Hz), 26.7 (d,  $J = 24.7$  Hz);  $^{19}\text{F}$  NMR (376 MHz,  $\text{CDCl}_3$ )  $\delta$  –140.8; HRMS (ESI) Found  $\text{MNa}^+$  231.1156,  $\text{C}_{13}\text{H}_{17}\text{FNaO}$  requires 231.1161.

#### 1-Cyclohexyl-4-fluoro-4-methylpentan-1-one (**8c**)

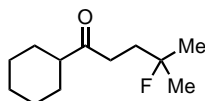

Following **GP13**, **6j** (28 mg, 0.1 mmol) gave **8c** (17 mg, 74%) as an oil. FT-IR  $\nu_{\text{max}}$  (film)/ $\text{cm}^{-1}$  1710, 1418, 1359, 1220, 1092, 533;  $^1\text{H}$  NMR (500 MHz,  $\text{CDCl}_3$ )  $\delta$  2.60–2.55 (2H, m), 2.36–2.18 (1H, m), 1.93–1.64 (8H, m), 1.34 (6H, d,  $J = 21.1$  Hz), 1.37–1.16 (4H, m);  $^{13}\text{C}$  NMR (126 MHz,  $\text{CDCl}_3$ )  $\delta$  213.5, 95.2 (d,  $J = 165.8$  Hz), 51.0, 34.9 (d,  $J = 3.6$  Hz), 34.6 (d,  $J = 22.7$  Hz), 28.6, 26.7 (d,  $J = 24.7$  Hz), 25.8, 25.7;  $^{19}\text{F}$  NMR (376 MHz,  $\text{CDCl}_3$ )  $\delta$  –140.83; HRMS (ESI) Found  $\text{MNa}^+$  223.1469,  $\text{C}_{12}\text{H}_{21}\text{FNaO}$  requires 223.1474.

### 5-Fluoro-3-hydroxy-5-methyl-1-phenylhexan-2-one (8d)

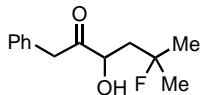

Following **GP13**, **6s** (32 mg, 0.1 mmol) gave **8d** (14 mg, 57%) as an oil. FT-IR  $\nu_{\max}$  (film)/ $\text{cm}^{-1}$  1710, 1421, 1360, 1221, 1092, 903, 587;  $^1\text{H}$  NMR (500 MHz,  $\text{CDCl}_3$ )  $\delta$  7.35–7.32 (2H, m), 7.31–7.26 (1H, m), 7.23–7.21 (2H, m), 4.52–4.39 (1H, br s, OH), 3.83 (1H, d,  $J = 15.7$  Hz), 3.76 (1H, d,  $J = 15.7$  Hz), 3.44–3.33 (1H, m), 2.26–2.18 (1H, m), 1.84 (1H, m), 1.44 (3H, d,  $J = 20.9$  Hz), 1.43 (3H, d,  $J = 22.0$  Hz);  $^{13}\text{C}$  NMR (126 MHz,  $\text{CDCl}_3$ )  $\delta$  209.6, 133.4, 129.7, 128.9, 127.4, 95.9 (d,  $J = 165.2$  Hz), 73.6 (d,  $J = 3.9$  Hz), 44.9 (d,  $J = 1.4$  Hz), 44.5 (d,  $J = 21.9$  Hz), 27.6 (d,  $J = 24.3$  Hz), 27.2 (d,  $J = 24.4$  Hz);  $^{19}\text{F}$  NMR (376 MHz,  $\text{CDCl}_3$ )  $\delta$  -135.1 HRMS (ESI) Found  $\text{MNa}^+$  247.1105,  $\text{C}_{13}\text{H}_{17}\text{FNaO}_2$  requires 247.1110.

### Ethyl 8-fluoro-8-methyl-5-oxononanoate (8e)

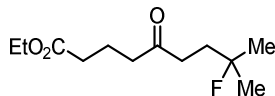

Following **GP13**, **6k** (33 mg, 0.1 mmol) gave **8e** (17 mg, 71%) as an oil. FT-IR  $\nu_{\max}$  (film)/ $\text{cm}^{-1}$  1710, 1418, 1359, 1220, 1091, 1062, 531;  $^1\text{H}$  NMR (400 MHz,  $\text{CDCl}_3$ )  $\delta$  4.13 (2H, q,  $J = 7.1$  Hz), 2.60–2.47 (4H, m), 2.33 (2H, t,  $J = 7.2$  Hz), 1.97–1.81 (4H, m), 1.34 (6H, d,  $J = 21.3$  Hz), 1.25 (3H, t,  $J = 7.1$  Hz);  $^{13}\text{C}$  NMR (126 MHz,  $\text{CDCl}_3$ )  $\delta$  209.5, 173.3, 95.0 (d,  $J = 166.1$  Hz), 60.5, 41.8, 37.3 (d,  $J = 3.7$  Hz), 34.7 (d,  $J = 22.8$  Hz), 33.5, 26.8 (d,  $J = 24.6$  Hz), 19.1, 14.4;  $^{19}\text{F}$  NMR (376 MHz,  $\text{CDCl}_3$ )  $\delta$  -140.9; HRMS (ESI) Found  $\text{MNa}^+$  255.1367,  $\text{C}_{12}\text{H}_{21}\text{FNaO}$  requires 255.1372.

### 10-Bromo-2-fluoro-2-methyldecan-5-one (8f)

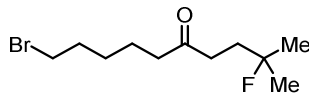

Following **GP13**, **6l** (37 mg, 0.1 mmol) gave **8f** (17 mg, 59%) as an oil. FT-IR  $\nu_{\max}$  (film)/ $\text{cm}^{-1}$  3327, 2969, 2942, 2831, 1449, 1414, 1380, 1023, 951, 816, 669;  $^1\text{H}$  NMR (500 MHz,  $\text{CDCl}_3$ )  $\delta$  3.34 (2H, t,  $J = 6.7$  Hz), 2.51–2.45 (2H, m), 2.39 (2H, t,  $J = 7.4$  Hz), 1.94–1.81 (2H, m), 1.54 (2H, dt,  $J = 21.3, 7.4$  Hz), 1.42–1.33 (4H, m), 1.27 (6H, d,  $J = 21.3$  Hz);  $^{13}\text{C}$  NMR (126 MHz,  $\text{CDCl}_3$ )  $\delta$  210.1, 95.0 (d,  $J = 165.9$  Hz), 42.7, 37.3 (d,  $J = 3.6$  Hz), 34.8 (d,  $J = 22.8$  Hz), 33.8, 32.7, 27.8, 26.8 (d,  $J = 24.7$  Hz), 23.0;  $^{19}\text{F}$  NMR (376 MHz,  $\text{CDCl}_3$ ) -140.9; HRMS (ESI) Found  $\text{MNa}^+$  289.0574,  $\text{C}_{11}\text{H}_{20}\text{BrFNaO}$  requires 289.0579.

### 10-Azido-2-fluoro-2-methyldecane-5-one (**8g**)

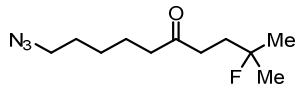

Following **GP13**, **6m** (31 mg, 0.1 mmol) gave **8g** (20 mg, 79%) as an oil. FT-IR  $\nu_{\text{max}}$  (film)/ $\text{cm}^{-1}$  3398, 1704, 1640, 1421, 1364, 1223, 669-533 (bs);  $^1\text{H}$  NMR (400 MHz,  $\text{CDCl}_3$ )  $\delta$  3.27 (2H, t,  $J = 6.8$  Hz), 2.54 (2H, t,  $J = 7.4$  Hz), 2.46 (2H, t,  $J = 7.3$  Hz), 1.90 (2H, dt,  $J = 21.2, 7.4$  Hz), 1.65–1.57 (4H, m), 1.43–1.23 (2H, m), 1.34 (6H, d,  $J = 21.2$  Hz);  $^{13}\text{C}$  NMR (126 MHz,  $\text{CDCl}_3$ )  $\delta$  210.1, 95.0 (d,  $J = 166.1$  Hz), 51.4, 42.7, 37.3 (d,  $J = 3.6$  Hz), 34.8 (d,  $J = 22.8$  Hz), 28.9, 26.9, 26.7 (d,  $J = 24.7$  Hz), 23.4;  $^{19}\text{F}$  NMR (376 MHz,  $\text{CDCl}_3$ )  $\delta$  -140.9; HRMS (ESI) Found  $\text{MNa}^+$  252.1483,  $\text{C}_{11}\text{H}_{20}\text{FN}_3\text{NaO}$  requires 252.1488.

### 10-Fluoro-10-methyl-7-oxoundecanenitrile (**8h**)

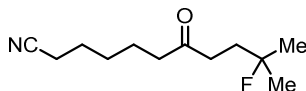

Following **GP13**, **6n** (30 mg, 0.1 mmol) gave **8h** (14 mg, 66%) as an oil. FT-IR  $\nu_{\text{max}}$  (film)/ $\text{cm}^{-1}$  3321, 2941, 2831, 1449, 1375, 1022, 917, 668;  $^1\text{H}$  NMR (500 MHz,  $\text{CDCl}_3$ )  $\delta$  2.54 (2H, t,  $J = 7.6$  Hz), 2.47 (2H, t,  $J = 7.2$  Hz), 2.35 (2H, t,  $J = 7.1$  Hz), 1.90 (2H, dt,  $J = 21.3, 7.5$  Hz), 1.67 (2H, p,  $J = 7.7$  Hz), 1.62 (2H, p,  $J = 7.7$  Hz), 1.50–1.41 (2H, m), 1.34 (6H, d,  $J = 21.3$  Hz);  $^{13}\text{C}$  NMR (126 MHz,  $\text{CDCl}_3$ )  $\delta$  209.9, 119.8, 95.0 (d,  $J = 166.0$  Hz), 42.4, 37.3 (d,  $J = 3.6$  Hz), 34.7 (d,  $J = 22.8$  Hz), 28.3, 26.8 (d,  $J = 24.7$  Hz), 25.4, 22.9, 17.2;  $^{19}\text{F}$  NMR (376 MHz,  $\text{CDCl}_3$ )  $\delta$  -140.9; HRMS (ESI) Found  $\text{MNa}^+$  236.1429,  $\text{C}_{12}\text{H}_{20}\text{FNaNO}$  requires 236.1427.

### 2-Fluoro-2-methyl-10-phenoxydecane-5-one (**8i**)

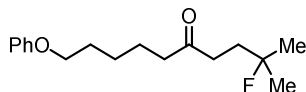

Following **GP13**, **6o** (38 mg, 0.1 mmol) gave **8i** (21 mg, 68%) as an oil.  $^1\text{H}$  NMR (500 MHz,  $\text{CDCl}_3$ )  $\delta$  7.21 (2H, d,  $J = 7.3$  Hz), 6.93 (1H, t,  $J = 7.2$  Hz), 6.89 (2H, d,  $J = 7.8$  Hz), 3.96 (2H, t,  $J = 6.3$  Hz), 2.55 (2H, t,  $J = 7.7$  Hz), 2.47 (2H, t,  $J = 7.3$  Hz), 1.90 (2H, dt,  $J = 19.3, 7.3$  Hz), 1.84–1.62 (4H, m), 1.52 – 1.41 (2H, m), 1.34 (6H, d,  $J = 21.3$  Hz);  $^{13}\text{C}$  NMR (126 MHz,  $\text{CDCl}_3$ )  $\delta$  210.1, 158.9, 129.3, 120.5, 114.4, 94.7 (d,  $J = 166.1$  Hz), 67.4, 42.6, 37.0 (d,  $J = 3.7$  Hz), 34.5 (d,  $J = 22.9$  Hz), 29.0, 26.6 (d,  $J = 24.7$  Hz), 25.6, 23.5;  $^{19}\text{F}$  NMR (471 MHz,  $\text{CDCl}_3$ )  $\delta$  -140.8.

### 2-Fluoro-2-methyl-10-(phenylthio)decan-5-one (8j)

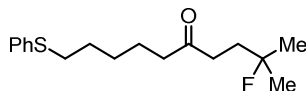

Following **GP13**, **6p** (38 mg, 0.1 mmol) gave **8j** (15 mg, 52%) as an oil. FT-IR  $\nu_{\max}$  (film)/ $\text{cm}^{-1}$  1710, 1436, 1357, 12220, 531;  $^1\text{H}$  NMR (500 MHz,  $\text{CDCl}_3$ )  $\delta$  7.61 (2H, d,  $J = 7.6$  Hz), 7.54–7.47 (3H, m), 2.78 (2H, t,  $J = 7.5$  Hz), 2.52 (2H,  $J = 7.5$  Hz), 2.43 (2H, t,  $J = 7.2$  Hz), 1.88 (2H, dt,  $J = 21.3, 7.5$  Hz), 1.67–1.54 (4H, m), 1.51–1.31 (2H, m), 1.33 (6H, d,  $J = 21.3$  Hz);  $^{13}\text{C}$  NMR (126 MHz,  $\text{CDCl}_3$ )  $\delta$  210.3, 144.3, 131.3, 129.6, 124.4, 95.2 (d,  $J = 166.0$  Hz), 57.3, 42.7, 37.6 (d,  $J = 3.6$  Hz), 35.0 (d,  $J = 22.9$  Hz), 28.5, 27.1 (d,  $J = 24.7$  Hz), 23.6, 22.3;  $^{19}\text{F}$  NMR (471 MHz,  $\text{CDCl}_3$ )  $\delta$  -140.9; HRMS (ESI) Found  $\text{MNa}^+$  319.1502,  $\text{C}_{17}\text{H}_{25}\text{FNaSO}$  requires 319.1508.

### 5-Fluoro-5-methyl-1-phenyldecan-2-one (8k)

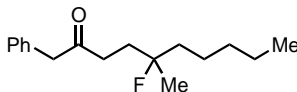

Following **GP13**, **6u** (35 mg, 0.1 mmol) gave **8k** (17 mg, 63%) as an oil. FT-IR  $\nu_{\max}$  (film)/ $\text{cm}^{-1}$  2253, 1440, 1374, 1032, 918, 737;  $^1\text{H}$  NMR (500 MHz,  $\text{CDCl}_3$ )  $\delta$  7.33 (1H, t,  $J = 7.2$  Hz), 7.29–7.25 (1H, m), 7.21 (2H, d,  $J = 6.9$  Hz), 3.64 (2H, s), 2.50 (2H, t,  $J = 7.7$  Hz), 1.94–1.64 (2H, m), 1.61–1.37 (2H, m), 1.33–1.22 (6H, m), 1.16 (3H, d,  $J = 21.7$  Hz), 0.87–0.76 (3H, m);  $^{13}\text{C}$  NMR (126 MHz,  $\text{CDCl}_3$ )  $\delta$  207.6, 134.1, 129.3, 128.8, 128.6, 126.9, 96.6 (d,  $J = 168.0$  Hz), 95.7 (d,  $J = 188.1$  Hz), 50.1, 39.4 (d,  $J = 22.6$  Hz), 36.1 (H, d,  $J = 4.0$  Hz), 32.9, 32.8, 25.7 (H, d,  $J = 6.0$  Hz), 23.9 (d,  $J = 24.9$  Hz), 22.90, 13.85;  $^{19}\text{F}$  NMR (376 MHz,  $\text{CDCl}_3$ )  $\delta$  -146.0; HRMS (ESI) Found  $\text{MNa}^+$  287.3748,  $\text{C}_{17}\text{H}_{25}\text{FNaO}$  requires 287.3742.

### 5-Fluoro-5,9-dimethyl-1-phenyldecan-2-one (8l)

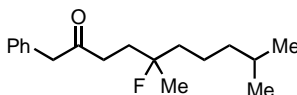

Following **GP13**, **6r** (37 mg, 0.1 mmol) gave **8l** (16 mg, 59%) as an oil. FT-IR  $\nu_{\max}$  (film)/ $\text{cm}^{-1}$  2253, 1443, 1375, 1029, 918, 737, 586;  $^1\text{H}$  NMR (500 MHz,  $\text{CDCl}_3$ )  $\delta$  7.35–7.31 (2H, m), 7.30–7.24 (1H, m), 7.21 (2H, d,  $J = 7.2$  Hz), 3.72 (2H, s), 2.58 (2H, t,  $J = 7.8$  Hz), 1.99–1.72 (2H, m), 1.52–1.42 (1H, m), 1.35–1.27 (2H, m), 1.24 (3H, d,  $J = 21.7$  Hz), 1.19–1.09 (2H, m), 0.86 (6H, d,  $J = 6.6$  Hz), 0.90–0.82 (2H, m);  $^{13}\text{C}$  NMR (126 MHz,  $\text{CDCl}_3$ )  $\delta$  207.9, 134.3, 129.5, 129.0 (d,  $J = 19.3$  Hz), 127.2, 96.9 (d,  $J = 168.0$  Hz), 50.3, 40.2 (d,  $J = 22.6$  Hz), 39.4, 36.3 (d,  $J = 4.0$  Hz), 33.1 (d,  $J = 22.9$  Hz), 28.0, 24.1 (d,  $J = 24.9$  Hz), 22.7 (d,

$J = 4.6$  Hz), 21.6 (d,  $J = 6.1$  Hz);  $^{19}\text{F}$  NMR (376 MHz,  $\text{CDCl}_3$ )  $\delta -146.5$ ; HRMS (ESI) Found  $\text{MNa}^+$  301.1952,  $\text{C}_{18}\text{H}_{27}\text{FNaO}$  requires 301.1944.

#### 4-(1-Fluorocyclopentyl)-1-phenylbutan-2-one (**8m**)

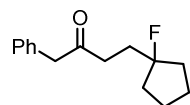

Following **GP13**, **6v** (41 mg, 0.13 mmol) gave **8m** (25 mg, 82%) as an oil. FT-IR  $\nu_{\text{max}}$  (film)/ $\text{cm}^{-1}$  2943, 2293, 2252, 1712, 1443, 1374, 1223, 1038, 917, 736;  $^1\text{H}$  NMR (500 MHz,  $\text{CDCl}_3$ )  $\delta$  7.35–7.31 (2H, m), 7.30–7.24 (1H, m), 7.21 (2H, d,  $J = 7.6$  Hz), 3.72 (2H, s), 2.64 (2H, t,  $J = 7.5$  Hz), 1.98 (2H, dt,  $J = 22.5, 7.5$  Hz), 1.92–1.73 (4H, m), 1.65–1.44 (4H, m);  $^{13}\text{C}$  NMR (126 MHz,  $\text{CDCl}_3$ )  $\delta$  208.3, 134.6, 129.8, 129.1, 127.5, 106.7 (d,  $J = 172.9$  Hz), 50.9, 37.9 (d,  $J = 23.7$  Hz), 37.6 (d,  $J = 2.8$  Hz), 32.6 (d,  $J = 24.1$  Hz), 24.2;  $^{19}\text{F}$  NMR (376 MHz,  $\text{CDCl}_3$ )  $\delta -144.5$ ; HRMS (ESI) Found  $\text{MNa}^+$  257.1312,  $\text{C}_{15}\text{H}_{19}\text{FNaO}$  requires 257.1318.

#### *tert*-Butyl 4-fluoro-4-(3-oxo-4-phenylbutyl)piperidine-1-carboxylate (**8n**)

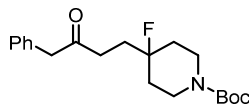

Following **GP13**, **6t** (22 mg, 0.05 mmol) gave **8n** (15 mg, 82%) as an oil. dr: 3:1. FT-IR  $\nu_{\text{max}}$  (film)/ $\text{cm}^{-1}$  2970, 1708, 1418, 1362, 1221, 1160, 1129, 1093, 951, 816;  $^1\text{H}$  NMR (500 MHz,  $\text{CDCl}_3$ , diastereomers and rotamers)  $\delta$  7.46–7.26 (3.5H, m), 7.20 (1.5H, d,  $J = 7.5$  Hz), 4.17–3.77 (2.5H, m), 3.71 & 3.69 (1.5H, s), 3.02 (1.5H, br t,  $J = 12.1$  Hz), 2.78–2.66 (0.5H, m), 2.60 (1.5H, t,  $J = 7.6$  Hz), 2.46 (0.5H, t,  $J = 7.5$  Hz), 1.87 (1.5H, dt,  $J = 21.4, 7.7$  Hz), 1.76–1.64 (1.5H, m), 1.64–1.58 (0.5H, m), 1.57–1.46 (2.5H, m), 1.45 & 1.44 (9H, s);  $^{13}\text{C}$  NMR (126 MHz,  $\text{CDCl}_3$ , diastereomers and rotamers)  $\delta$  208.3<sup>m</sup>, 207.4<sup>M</sup>, 154.8<sup>m</sup>, 154.7<sup>M</sup>, 134.2<sup>m</sup>, 134.0<sup>M</sup>, 129.4, 128.8, 128.8, 127.2<sup>M</sup>, 127.1<sup>m</sup>, 95.9 (d,  $J = 188.1$  Hz)<sup>m</sup>, 93.3 (d,  $J = 172.1$  Hz)<sup>M</sup>, 79.6<sup>M</sup>, 79.2<sup>m</sup>, 50.3<sup>m</sup>, 50.3<sup>M</sup>, 44.8<sup>m</sup> (br s), 39.6<sup>M</sup> (br s), 38.8, 35.3, 35.1 (d,  $J = 3.5$  Hz), 34.6 (br s) 33.5 (d,  $J = 22.2$  Hz), 30.1, 28.5<sup>m</sup>, 28.4<sup>M</sup>;  $^{19}\text{F}$  NMR (376 MHz,  $\text{CDCl}_3$ )  $\delta -164.54^{\text{M}}$ ,  $-164.81^{\text{m}}$ ; HRMS (ESI) Found  $\text{MNa}^+$  372.1945,  $\text{C}_{20}\text{H}_{28}\text{FNNaO}_3$  requires 372.1951.

**5-Fluoro-5-((5*R*,8*R*,9*S*,10*S*,13*S*,14*S*,17*S*)-3-hydroxy-10,13-dimethylhexadecahydro-1*H*-cyclopenta[*a*]phenanthren-17-yl)hexan-2-one (8o)**

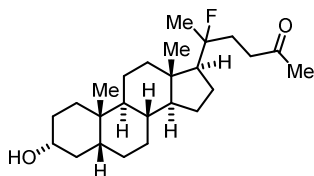

Following **GP13**, **6w** (32 mg, 0.07 mmol) gave **8o** (19 mg, 71%) as an oil. dr: 1.3:1. FT-IR  $\nu_{\text{max}}$  (film)/ $\text{cm}^{-1}$  3313, 2942, 2831, 1448, 1418, 1381, 1113, 1023, 951;  $^1\text{H}$  NMR (500 MHz,  $\text{CDCl}_3$ , diastereomers)  $\delta$  3.67–3.56 (1H, m), 2.59–2.52 (1H, m), 2.52–2.45 (1H, m), 2.17 (1.3H, s), 2.16 (1.7H, s), 2.09–1.96 (2H, m), 1.92–1.69 (4H, m), 1.69–1.44 (7H, m), 1.45–1.34 (4H, m), 1.35 (3H, d,  $J = 21.7$  Hz), 1.31–1.23 (4H, m), 1.21–0.93 (4H, m), 0.92 (3H, s), 0.78 (3H, d,  $J = 3.1$  Hz);  $^{13}\text{C}$  NMR (126 MHz,  $\text{CDCl}_3$ , diastereomers)  $\delta$  208.3, 208.2, 98.9 (d,  $J = 172.9$  Hz)<sup>M</sup>, 98.3 (d,  $J = 173.5$  Hz)<sup>m</sup>, 71.8, 57.8 (d,  $J = 20.1$  Hz), 56.7, 43.0, 42.8, 42.0, 40.4 (d,  $J = 4.0$  Hz), 40.3, 38.2 (d,  $J = 4.9$  Hz)<sup>m</sup>, 38.0 (d,  $J = 6.0$  Hz)<sup>M</sup>, 36.4, 35.3 (d,  $J = 4.2$  Hz), 34.6, 34.0 (d,  $J = 23.9$  Hz)<sup>M</sup>, 33.1 (d,  $J = 24.3$  Hz)<sup>m</sup>, 30.5 (d,  $J = 1.2$  Hz), 30.0 (d,  $J = 6.2$  Hz), 27.1, 26.3 (d,  $J = 3.0$  Hz), 24.1 (d,  $J = 25.4$  Hz)<sup>m</sup>, 23.7, 23.6, 23.3, 23.2 (d,  $J = 5.5$  Hz)<sup>m</sup>, 23.2 (d,  $J = 25.4$  Hz)<sup>M</sup>, 22.6 (d,  $J = 4.0$  Hz)<sup>M</sup>, 20.6, 20.6, 13.2 (H, d,  $J = 4.0$  Hz), 13.0 (d,  $J = 4.1$  Hz);  $^{19}\text{F}$  NMR (376 MHz,  $\text{CDCl}_3$ )  $\delta$   $-154.3^{\text{M}}$ ,  $-154.5^{\text{m}}$ ; HRMS (ESI) Found  $\text{MNa}^+$  415.2983,  $\text{C}_{25}\text{H}_{41}\text{FNNaO}_2$  requires 415.2988.



## 6 Mechanistic Considerations

### 6.1 Emission Quenching Experiments

Emission intensities were recorded using a Steady State emission spectra were recorded on an Edinburgh Instrument FP920 Phosphorescence Lifetime Spectrometer equipped with a 5 watt microsecond pulsed xenon flash lamp and a 450 watt steady state xenon lamp and a red sensitive photomultiplier in peltier (air cooled) housing, (Hamamatsu R928P) spectrophotometer. The **2** solutions were excited at 436 nm and the emission intensity was collected at 505 nm.

*Experimental procedures:*

A screw-top quartz cuvette was charged with a  $1.6 \times 10^{-5}$  M solution of **2** in  $\text{CH}_2\text{Cl}_2$  (2.0 mL) and the initial emission was collected then the appropriate amount of the quencher as a  $1.6 \times 10^{-2}$  M solution in  $\text{CH}_2\text{Cl}_2$  was added. The sample was shaken for 1 min and then the emission of the sample was collected.

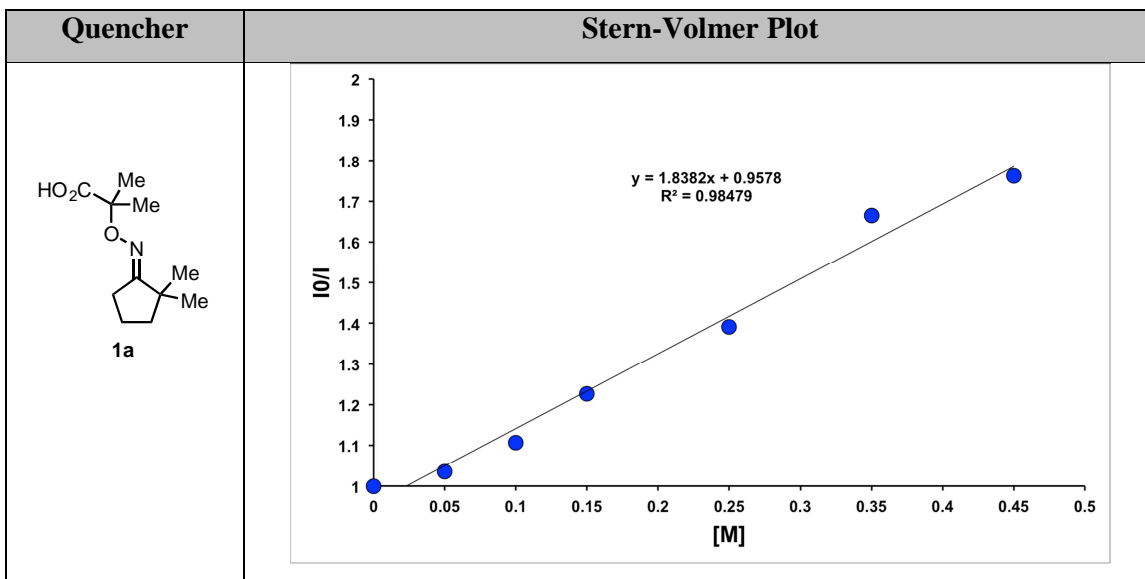

| Quencher                                                                            | Stern-Volmer Plot                                                                    |
|-------------------------------------------------------------------------------------|--------------------------------------------------------------------------------------|
| 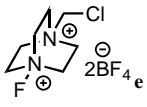   |    |
|    |   |
|  |  |

<sup>e</sup> In this case CH<sub>3</sub>CN was used as the solvent.

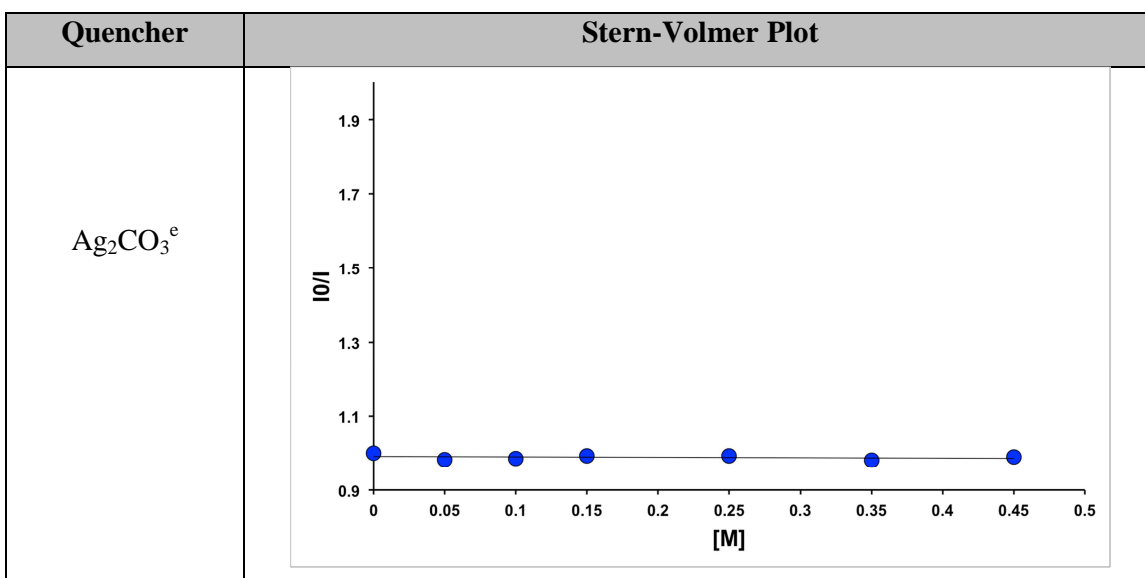

The quenching constants were obtained using the Stern-Volmer relationship:

$$\frac{I_0}{I} = 1 + k_q \tau_0 [\text{Quencher}]$$

| Substrate                       | $k_q$ (M <sup>-1</sup> s <sup>-1</sup> ) |
|---------------------------------|------------------------------------------|
| <p>1a</p>                       | $3.1 \times 10^8$                        |
|                                 | —                                        |
|                                 | $1.5 \times 10^8$                        |
|                                 | $1.5 \times 10^8$                        |
| Ag <sub>2</sub> CO <sub>3</sub> | —                                        |

## 6.2 Quantum Yield Determination

The quantum yield determination was performed following the procedure reported by Yoon<sup>[19]</sup> and are the average of two runs.

| Reaction                                                                                                                                                                                                                                                                                                                  | Quantum Yield ( $\Phi$ ) |
|---------------------------------------------------------------------------------------------------------------------------------------------------------------------------------------------------------------------------------------------------------------------------------------------------------------------------|--------------------------|
| 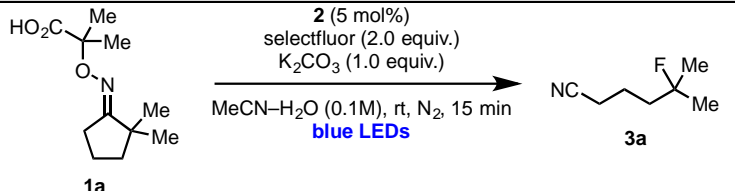 <p><b>1a</b> <math>\xrightarrow[\text{MeCN-H}_2\text{O (0.1M), rt, N}_2, 15 \text{ min, blue LEDs}]{\text{2 (5 mol\%), selectfluor (2.0 equiv.), K}_2\text{CO}_3 \text{ (1.0 equiv.)}}</math> <b>3a</b></p>                             | 2.8                      |
|  <p><b>6a</b> <math>\xrightarrow[\text{MeCN-H}_2\text{O (0.1M), rt, N}_2, 15 \text{ min, blue LEDs}]{\text{2 (5 mol\%), selectfluor (2.0 equiv.), Cs}_2\text{CO}_3 \text{ (1.0 equiv.), AgCO}_3 \text{ (25 mol\%)}}</math> <b>8a</b></p> | 4.8                      |

### 6.3 Ring-Opening: DFT Reactivity Scales

The following radical ring-openings were not found experimentally successful:

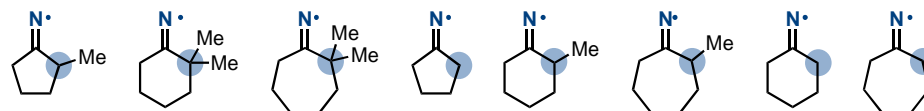

We have performed DFT studies aimed at determine the reaction parameters and reported them graphically in the following scales.

#### • $\Delta G^\ddagger$ (kcal mol<sup>-1</sup>)

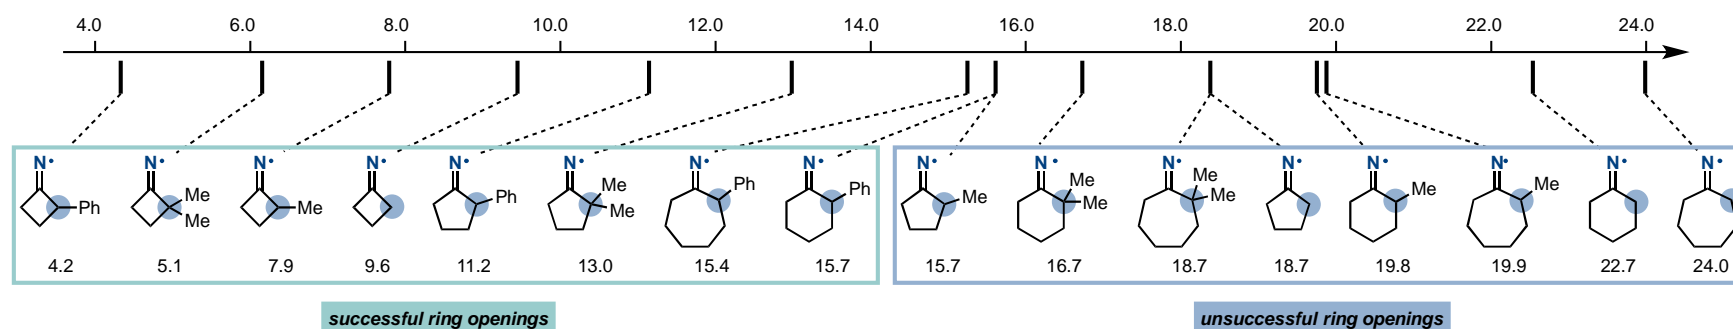

#### • $\Delta G^\circ$ (kcal mol<sup>-1</sup>)

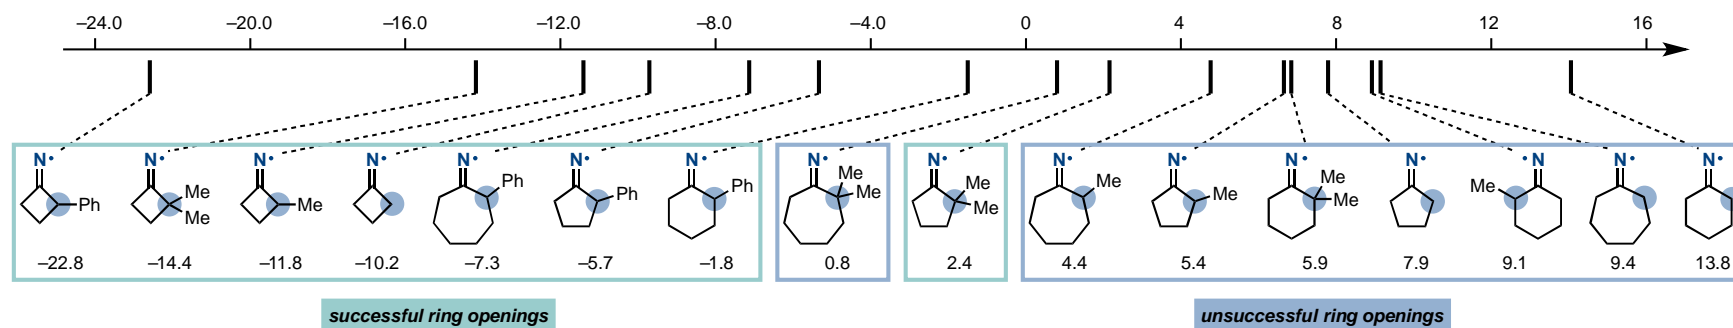

## 6.4 1,5-H Abstraction: DFT Reactivity Scales

The following 1,5-H abstraction were not found experimentally successful:

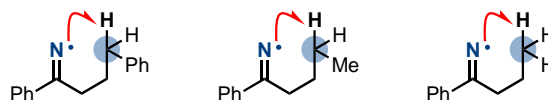

We have performed DFT studies aimed at determine the reaction parameters and reported them graphically in the following scales.

•  $\Delta G^\ddagger$  (kcal mol<sup>-1</sup>)

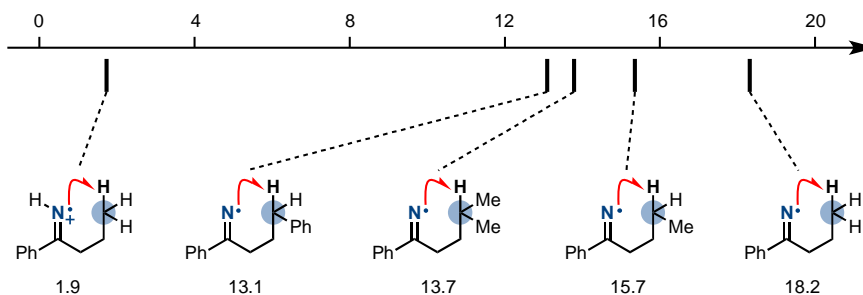

•  $\Delta G^\circ$  (kcal mol<sup>-1</sup>)

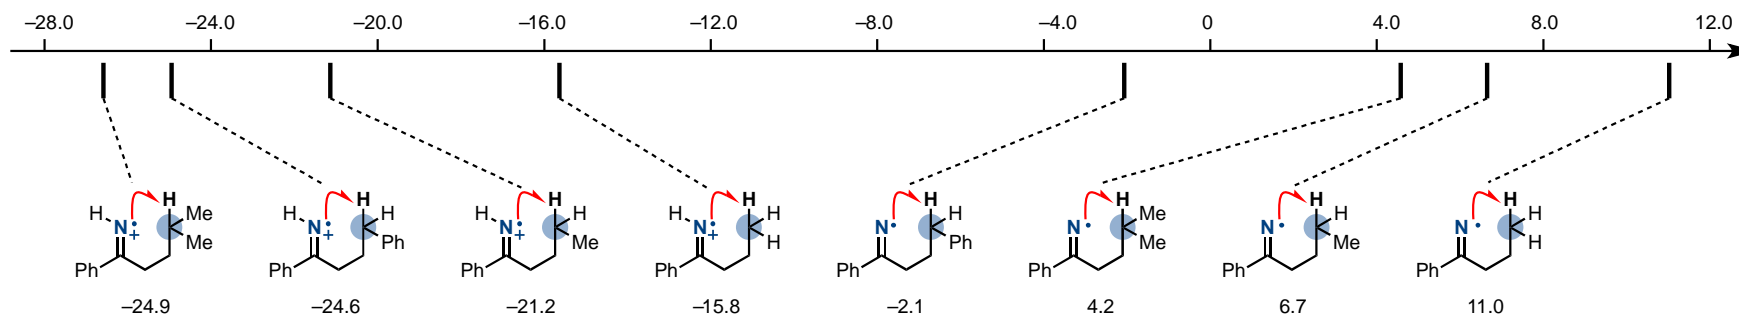

## 6.5 Role of Ag(I) in the 1,5-H Abstraction Fluorination

We have performed preliminary mechanistic studies to understand the role of Ag(I) in the 1,5-H abstraction fluorination cascade. We propose that the Ag(I) species acts as a dual co-catalyst facilitating both the radical fluorination and the final SET reduction.

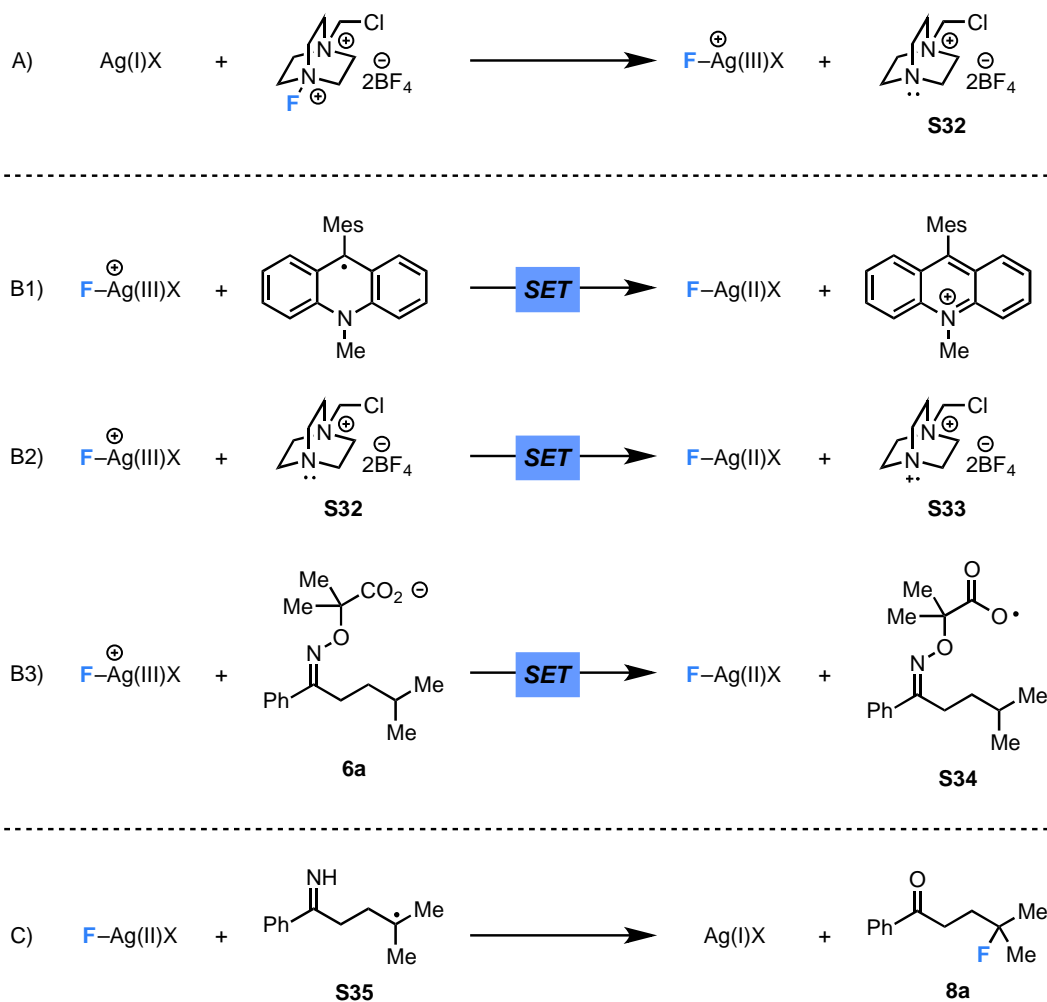

**A)** Selectfluor is a strong oxidant ( $E^{\text{red}} = +0.25 \text{ V vs SCE}$ )<sup>[20]</sup> that can provide to formation of Ag(III)-F species.<sup>[21]</sup>

**B)** Ag(III)-F species are known to be strong oxidants<sup>[21a]</sup> and we propose that they can close the photoredox cycle by direct SET with the reduced photoredox catalyst (**B1**) and can also sustain productive radical chain propagations by oxidation of the DABCO species **S32** (B2) and/or the deprotonated oxime **6a** (B3).

C) This SET would deliver a Ag(II)-F species which is a very powerful radical F-transfer agent.<sup>[21a, 21c, 21d]</sup> In this way, following 1,5-H abstraction, the C-radical **S35** would undergo F-transfer to give the product and regenerate the catalytically active Ag(I) species.

At this stage, the presence of multinuclear Ag-complexes<sup>[22]</sup> cannot be excluded.

In order to provide some evidence for this reactivity scenario we have run some control experiments with several Ag(I) sources.

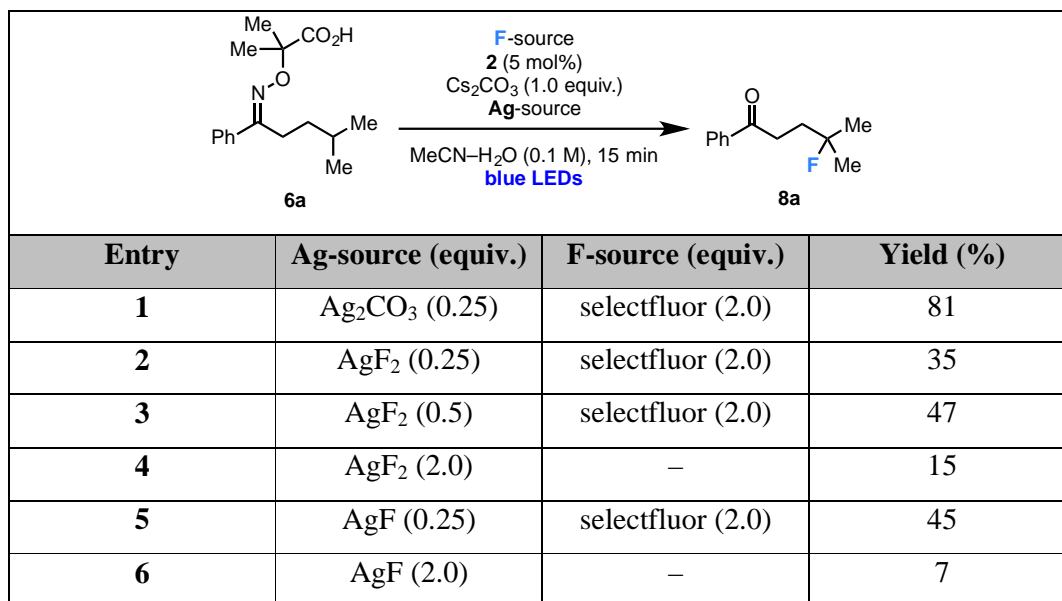

The successful formation of **8a** in the presence of AgF<sub>2</sub>, with and without selectfluor, supports our proposed mechanistic picture.

The unsuccessful reaction outcome when using NFSI can be result by the fact that NFSI being a weaker oxidant than selectfluor,<sup>[21d]</sup> does not enable the efficient generation of the Ag(III)-F species to sustain the photoredox cycle and/or the productive radical chain pathways operating under our reaction conditions.

We have also evaluated the possibility of the 1,5-abstraction and fluorination to take place following oxidative fragmentation from the oxime. We feel this is not the case because when ketone **S10** was exposed to identical reaction conditions, **8a** could not be detected and **S10** was quantitatively recovered.



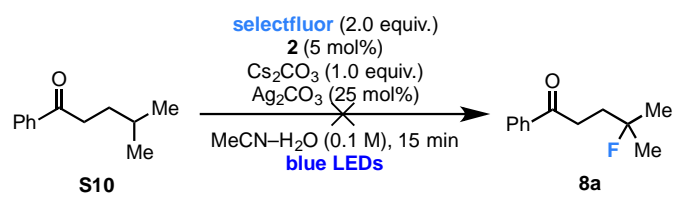

## 7 Computational Studies

### 7.1 Computational Methods

Density functional theory (DFT)<sup>[23]</sup> calculations were performed using Gaussian 09 (revision E.01)<sup>[24]</sup> and the Gaussview<sup>[25]</sup> was used to generate input geometries and visualize output structures. Geometry optimizations and frequency calculations for the ring-opening and 1,5-H atom abstraction reactions, B3LYP functional<sup>[26]</sup> was used with the UB3LYP/6-31+G(d,p) basis set.<sup>[27]</sup> All stationary points were characterized as minima or transition states based on normal vibrational mode analysis. Thermal corrections were computed from unscaled frequencies, assuming a standard state of 298.15 K and 1 atm. Representative transition states were also linked to their corresponding minima through the intrinsic reaction coordinate (IRC)<sup>[28]</sup> calculations, which confirm the connection of transition structures with the reactants and products. For substrates having more than one conformations, low energy conformation of the transition state could possibly be different from the low energy ground state.<sup>[29]</sup> The structures described herein are the lowest energy-optimized conformers. Homolytic bond dissociation enthalpies (BDE) were calculated using (RO)B3P86/6-311G(d,p) for the determination of geometries, frequencies (scaled by a factor of 0.9806) and molecular energies.<sup>[30]</sup>

## 7.2 Activation Energy ( $\Delta G^\ddagger$ ) and Reaction Energy ( $\Delta G^\circ$ ) for Ring-opening Reactions

*DFT Method:* UB3LYP/6-31+G(d,p) [values are in Kcal mol<sup>-1</sup>]

| No. | Ring-opening Reactions | $\Delta G^\ddagger$ | $\Delta G$ |
|-----|------------------------|---------------------|------------|
| 1   |                        | 9.6                 | -10.2      |
| 2   |                        | 7.9                 | -11.8      |
| 3   |                        | 4.2                 | -22.8      |
| 4   |                        | 5.1                 | -14.4      |
| 5   |                        | 18.7                | 7.9        |
| 6   |                        | 15.7                | 5.4        |
| 7   |                        | 11.2                | -5.7       |
| 8   |                        | 13.0                | 2.4        |
| 9   |                        | 22.7                | 13.8       |

| No. | Ring-opening Reactions | $\Delta G^\ddagger$ | $\Delta G$ |
|-----|------------------------|---------------------|------------|
| 10  |                        | 19.8                | 9.1        |
| 11  |                        | 15.7                | -1.8       |
| 12  |                        | 16.7                | 5.9        |
| 13  |                        | 24.0                | 9.4        |
| 14  |                        | 19.9                | 4.4        |
| 15  |                        | 15.4                | -7.3       |
| 16  |                        | 18.7                | 0.8        |

**Computed Energies** [values are in Hartree]

| No. | Species | Total Electronic Energy | Sum of Electronic and Zero-point Energies | Gibbs Free Energy |
|-----|---------|-------------------------|-------------------------------------------|-------------------|
|-----|---------|-------------------------|-------------------------------------------|-------------------|

| No. | Species | Total Electronic Energy | Sum of Electronic and Zero-point Energies | Gibbs Free Energy |
|-----|---------|-------------------------|-------------------------------------------|-------------------|
| 1   |         | -210.7166215            | -210.626489                               | -210.654033       |
| 2   |         | -210.6979534            | -210.609980                               | -210.638747       |
| 3   |         | -210.7281878            | -210.640406                               | -210.670367       |
| 4   |         | -250.0375918            | -249.919134                               | -249.949627       |
| 5   |         | -250.0224139            | -249.906168                               | -249.937034       |
| 6   |         | -250.051458             | -249.935230                               | -249.968477       |
| 7   |         | -441.7826685            | -441.611084                               | -441.648001       |
| 8   |         | -441.7747906            | -441.604834                               | -441.641311       |
| 9   |         | -441.8157272            | -441.645108                               | -441.684279       |
| 10  |         | -289.3572314            | -289.211182                               | -289.242115       |
| 11  |         | -289.345167             | -289.201106                               | -289.234027       |

| No. | Species | Total Electronic Energy | Sum of Electronic and Zero-point Energies | Gibbs Free Energy |
|-----|---------|-------------------------|-------------------------------------------|-------------------|
| 12  |         | -289.3743336            | -289.229876                               | -289.265095       |
| 13  |         | -250.0654743            | -249.944731                               | -249.974536       |
| 14  |         | -250.0319367            | -249.914602                               | -249.944672       |
| 15  |         | -250.0460994            | -249.929775                               | -249.961967       |
| 16  |         | -289.3829979            | -289.234136                               | -289.265863       |
| 17  |         | -289.3543375            | -289.208676                               | -289.240877       |
| 18  |         | -289.3672346            | -289.222321                               | -289.257209       |
| 19  |         | -481.1264788            | -480.924730                               | -480.963168       |
| 20  |         | -481.1077488            | -480.908192                               | -480.945302       |
| 21  |         | -481.1317662            | -480.932389                               | -480.972301       |

| No. | Species | Total Electronic Energy | Sum of Electronic and Zero-point Energies | Gibbs Free Energy |
|-----|---------|-------------------------|-------------------------------------------|-------------------|
| 22  |         | -328.701492             | -328.524961                               | -328.558012       |
| 23  |         | -328.6773023            | -328.503613                               | -328.537241       |
| 24  |         | -328.6897892            | -328.516962                               | -328.554184       |
| 25  |         | -289.3888477            | -289.238559                               | -289.269385       |
| 26  |         | -289.347792             | -289.201617                               | -289.233174       |
| 27  |         | -289.358242             | -289.213391                               | -289.247457       |
| 28  |         | -328.7047815            | -328.526316                               | -328.558864       |
| 29  |         | -328.6685384            | -328.493878                               | -328.527386       |
| 30  |         | -328.6807265            | -328.507405                               | -328.544424       |
| 31  |         | 520.4502628             | -520.219108                               | -520.257187       |

| No. | Species | Total Electronic Energy | Sum of Electronic and Zero-point Energies | Gibbs Free Energy |
|-----|---------|-------------------------|-------------------------------------------|-------------------|
| 32  |         | -520.4223635            | -520.193732                               | -520.232150       |
| 33  |         | -520.4466126            | -520.218597                               | -520.260097       |
| 34  |         | -368.0218584            | -367.815756                               | -367.849542       |
| 35  |         | -367.9906659            | -367.788018                               | -367.822917       |
| 36  |         | -368.0028887            | -367.801238                               | -367.840073       |
| 37  |         | -328.6984517            | -328.519696                               | -328.552846       |
| 38  |         | -328.656164             | -328.481218                               | -328.514526       |
| 39  |         | -328.6747067            | -328.501421                               | -328.537823       |
| 40  |         | -368.0146288            | -367.807675                               | -367.842371       |



| No. | Species | Total Electronic Energy | Sum of Electronic and Zero-point Energies | Gibbs Free Energy |
|-----|---------|-------------------------|-------------------------------------------|-------------------|
| 41  |         | -367.9787141            | -367.775556                               | -367.810646       |
| 42  |         | -367.9982529            | -367.796579                               | -367.835389       |
| 43  |         | -559.7577878            | -559.498148                               | -559.539089       |
| 44  |         | -559.7313942            | -559.474511                               | -559.514609       |
| 45  |         | -559.7630951            | -559.507007                               | -559.550721       |
| 46  |         | -407.3317484            | -407.096827                               | -407.132171       |
| 47  |         | -407.2976989            | -407.066051                               | -407.102373       |
| 48  |         | -407.3192837            | -407.089364                               | -407.130858       |

## Optimized Structures and Cartesian Coordinates

| No.                                                                                                                                                                                                                                                                                                                                                                                                                                                                                                                                                                             | Species                                                                             | Optimized Structure                                                                  |
|---------------------------------------------------------------------------------------------------------------------------------------------------------------------------------------------------------------------------------------------------------------------------------------------------------------------------------------------------------------------------------------------------------------------------------------------------------------------------------------------------------------------------------------------------------------------------------|-------------------------------------------------------------------------------------|--------------------------------------------------------------------------------------|
| 1                                                                                                                                                                                                                                                                                                                                                                                                                                                                                                                                                                               | 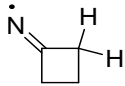   |    |
| Cartesian Coordinates<br>C      -0.34827600   1.10851000   0.00015700<br>C      -1.44316200   -0.00000100   0.00012700<br>C      -0.34827200   -1.10851000   0.00005800<br>C      0.73483500   0.00000100   -0.00008700<br>H      -0.30905700   1.74209700   -0.89043200<br>H      -0.30887900   1.74181100   0.89094400<br>H      -2.08063400   0.00003700   -0.88695300<br>H      -2.08065300   -0.00004100   0.88719200<br>H      -0.30905200   -1.74201000   -0.89059300<br>H      -0.30887700   -1.74190000   0.89078200<br>N      1.97520000   0.00000100   -0.00035200   |                                                                                     |                                                                                      |
| 2                                                                                                                                                                                                                                                                                                                                                                                                                                                                                                                                                                               |  |   |
| Cartesian Coordinates<br>C      0.88398000   -0.11220800   0.02056500<br>N      2.02656600   0.19840200   -0.09173600<br>C      -0.25301800   -1.10038400   0.10062300<br>H      -0.13631800   -1.91893300   -0.61746600<br>H      -0.27613200   -1.52580200   1.11009300<br>C      -1.41853100   -0.11599500   -0.15491300<br>H      -1.76692800   -0.17285000   -1.18977600<br>H      -2.27815900   -0.26631600   0.50509300<br>C      -0.64310700   1.16667600   0.10075200<br>H      -0.60923800   1.55624100   1.11579900<br>H      -0.53513300   1.91031700   -0.68375100 |                                                                                     |                                                                                      |
| 3                                                                                                                                                                                                                                                                                                                                                                                                                                                                                                                                                                               |  |  |

| No.                   | Species                                                                             | Optimized Structure                                                                  |
|-----------------------|-------------------------------------------------------------------------------------|--------------------------------------------------------------------------------------|
| Cartesian Coordinates |                                                                                     |                                                                                      |
| C                     | 1.25982700 0.05564000 -0.04482200                                                   |                                                                                      |
| N                     | 2.16199600 -0.64965800 0.15041400                                                   |                                                                                      |
| C                     | 0.11157900 0.93691200 -0.28001900                                                   |                                                                                      |
| H                     | 0.35312200 1.92509900 0.12773500                                                    |                                                                                      |
| H                     | -0.01462100 1.05257900 -1.36252300                                                  |                                                                                      |
| C                     | -1.19934700 0.40714900 0.35509500                                                   |                                                                                      |
| H                     | -1.04879600 0.35506700 1.44740800                                                   |                                                                                      |
| H                     | -1.97645600 1.16411700 0.19579600                                                   |                                                                                      |
| C                     | -1.64336400 -0.91354200 -0.17577500                                                 |                                                                                      |
| H                     | -2.69722400 -1.16727700 -0.20822300                                                 |                                                                                      |
| H                     | -0.92216200 -1.69892700 -0.37996400                                                 |                                                                                      |
| 4                     | 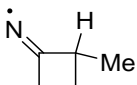   |    |
| Cartesian Coordinates |                                                                                     |                                                                                      |
| C                     | -1.44383900 0.65950500 -0.11555500                                                  |                                                                                      |
| C                     | -0.09920300 1.44114400 -0.08342000                                                  |                                                                                      |
| C                     | 0.64047100 0.17279500 0.44249600                                                    |                                                                                      |
| C                     | -0.63976700 -0.64522600 0.09400300                                                  |                                                                                      |
| H                     | -2.09276400 0.86133100 0.74259100                                                   |                                                                                      |
| H                     | -2.03638700 0.69575600 -1.03276700                                                  |                                                                                      |
| H                     | -0.06407600 2.32420800 0.55898700                                                   |                                                                                      |
| H                     | 0.23839100 1.71929400 -1.08641500                                                   |                                                                                      |
| H                     | 0.73356400 0.20323900 1.53576200                                                    |                                                                                      |
| N                     | -0.87466200 -1.85138600 -0.06992700                                                 |                                                                                      |
| C                     | 1.95422700 -0.25468000 -0.19626000                                                  |                                                                                      |
| H                     | 2.74447200 0.46828300 0.03723800                                                    |                                                                                      |
| H                     | 2.26856700 -1.23610200 0.17192400                                                   |                                                                                      |
| H                     | 1.85952800 -0.31753400 -1.28541100                                                  |                                                                                      |
| 5                     |  |  |
| Cartesian Coordinates |                                                                                     |                                                                                      |
| C                     | 0.98709100 0.56152100 0.03839800                                                    |                                                                                      |
| N                     | 1.27609100 1.71373300 -0.05091500                                                   |                                                                                      |
| C                     | 1.27324100 -0.91464700 -0.08715900                                                  |                                                                                      |

| No.                   | Species                                                                                                                                                                                                                                                                                                                                                                                                                                                                                                                                                            | Optimized Structure                                                                  |
|-----------------------|--------------------------------------------------------------------------------------------------------------------------------------------------------------------------------------------------------------------------------------------------------------------------------------------------------------------------------------------------------------------------------------------------------------------------------------------------------------------------------------------------------------------------------------------------------------------|--------------------------------------------------------------------------------------|
|                       | H 1.88379400 -1.14857400 -0.96551800<br>H 1.81148600 -1.24703100 0.80752800<br>C -0.19312300 -1.40340900 -0.10858300<br>H -0.53706900 -1.57070900 -1.13433500<br>H -0.37469900 -2.31660400 0.46780200<br>C -0.81454300 -0.13975200 0.47414100<br>H -0.79835500 -0.07986800 1.56372400<br>C -1.94710300 0.57687600 -0.19621400<br>H -1.80312100 0.63031600 -1.28048200<br>H -2.90023100 0.05594400 -0.01257800<br>H -2.04781700 1.59686600 0.18677400                                                                                                               |                                                                                      |
| 6                     | 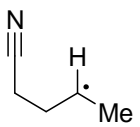                                                                                                                                                                                                                                                                                                                                                                                                                                                                                  |    |
| Cartesian Coordinates |                                                                                                                                                                                                                                                                                                                                                                                                                                                                                                                                                                    |                                                                                      |
|                       | C -1.57570100 -0.28660300 0.05132600<br>N -2.02488400 -1.35473900 -0.03335700<br>C -0.99389400 1.05577800 0.13870100<br>H -1.63009100 1.74265100 -0.43275100<br>H -1.02828000 1.37794400 1.18563600<br>C 0.47275500 1.12170200 -0.39072300<br>H 0.47396000 0.82450200 -1.44600600<br>H 0.75658800 2.18303300 -0.35508100<br>C 1.44651600 0.29448600 0.38632100<br>H 1.68168900 0.61038000 1.40107100<br>C 1.93825400 -1.03105500 -0.09255300<br>H 2.82315600 -1.35774500 0.46259200<br>H 1.17500400 -1.81957600 0.02001900<br>H 2.19457500 -1.00386300 -1.16041500 |                                                                                      |
| 7                     |                                                                                                                                                                                                                                                                                                                                                                                                                                                                                 |  |
| Cartesian Coordinates |                                                                                                                                                                                                                                                                                                                                                                                                                                                                                                                                                                    |                                                                                      |
|                       | C 3.07951800 -0.12077500 -0.48137600<br>C 1.88876400 -0.91600800 -1.08624300<br>C 1.04155500 -0.65307300 0.20490800<br>C 2.10835900 0.42549300 0.58868100                                                                                                                                                                                                                                                                                                                                                                                                          |                                                                                      |

| No.                   | Species                                                                            | Optimized Structure                                                                 |  |  |
|-----------------------|------------------------------------------------------------------------------------|-------------------------------------------------------------------------------------|--|--|
| H                     | 3.84628900 -0.75536800 -0.02556000                                                 |                                                                                     |  |  |
| H                     | 3.56053700 0.63720900 -1.10392500                                                  |                                                                                     |  |  |
| H                     | 2.06739300 -1.96444200 -1.33580200                                                 |                                                                                     |  |  |
| H                     | 1.45714600 -0.41088700 -1.95416200                                                 |                                                                                     |  |  |
| H                     | 1.16329400 -1.48882100 0.90430400                                                  |                                                                                     |  |  |
| N                     | 2.12073400 1.40063000 1.35394200                                                   |                                                                                     |  |  |
| C                     | -0.41398000 -0.28354700 0.09942100                                                 |                                                                                     |  |  |
| C                     | -1.39682900 -1.16041900 0.58012500                                                 |                                                                                     |  |  |
| C                     | -0.82278500 0.91514600 -0.50587200                                                 |                                                                                     |  |  |
| C                     | -2.75494900 -0.85642000 0.45149700                                                 |                                                                                     |  |  |
| H                     | -1.09712600 -2.08862500 1.06074900                                                 |                                                                                     |  |  |
| C                     | -2.17771500 1.22267100 -0.63364200                                                 |                                                                                     |  |  |
| H                     | -0.07755000 1.62116900 -0.86136200                                                 |                                                                                     |  |  |
| C                     | -3.14942700 0.33648400 -0.15757200                                                 |                                                                                     |  |  |
| H                     | -3.50085200 -1.54863000 0.83159100                                                 |                                                                                     |  |  |
| H                     | -2.47556700 2.15825200 -1.09831100                                                 |                                                                                     |  |  |
| H                     | -4.20376700 0.57841700 -0.25468000                                                 |                                                                                     |  |  |
| 8                     | 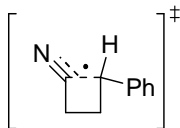 |  |  |  |
| Cartesian Coordinates |                                                                                    |                                                                                     |  |  |
| C                     | -2.19396000 0.71196500 0.51760500                                                  |                                                                                     |  |  |
| N                     | -2.03720300 1.65788700 1.23916800                                                  |                                                                                     |  |  |
| C                     | -3.07401000 -0.43746000 0.06661600                                                 |                                                                                     |  |  |
| H                     | -3.53127000 -0.97453600 0.90325400                                                 |                                                                                     |  |  |
| H                     | -3.87179600 -0.05207200 -0.57762800                                                |                                                                                     |  |  |
| C                     | -1.96452300 -1.17886200 -0.71363500                                                |                                                                                     |  |  |
| H                     | -1.57018300 -2.01905100 -0.13850300                                                |                                                                                     |  |  |
| H                     | -2.25610500 -1.55127300 -1.70022900                                                |                                                                                     |  |  |
| C                     | -0.99548500 0.00543800 -0.75389000                                                 |                                                                                     |  |  |
| C                     | 0.42229800 -0.05743100 -0.38449100                                                 |                                                                                     |  |  |
| C                     | 1.28001900 0.99154700 -0.77978900                                                  |                                                                                     |  |  |
| C                     | 0.96956400 -1.10278800 0.38761900                                                  |                                                                                     |  |  |
| C                     | 2.62733900 0.99191500 -0.42853500                                                  |                                                                                     |  |  |
| H                     | 0.87499500 1.81280500 -1.36518000                                                  |                                                                                     |  |  |
| C                     | 2.31946100 -1.10360600 0.73597300                                                  |                                                                                     |  |  |
| H                     | 0.33968600 -1.92086100 0.72192000                                                  |                                                                                     |  |  |
| C                     | 3.15535900 -0.05811400 0.33083500                                                  |                                                                                     |  |  |
| H                     | 3.26709900 1.81015400 -0.74618900                                                  |                                                                                     |  |  |
| H                     | 2.72016900 -1.92117100 1.32838000                                                  |                                                                                     |  |  |

| No.                   | Species                                                                             | Optimized Structure                                                                  |
|-----------------------|-------------------------------------------------------------------------------------|--------------------------------------------------------------------------------------|
| H                     | 4.20591400 -0.06025200 0.60581900                                                   |                                                                                      |
| H                     | -1.19446800 0.69541300 -1.57566600                                                  |                                                                                      |
| 9                     | 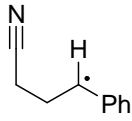   |    |
| Cartesian Coordinates |                                                                                     |                                                                                      |
| C                     | 3.21013300 0.02037500 0.80568500                                                    |                                                                                      |
| N                     | 3.30254200 0.10539600 1.96049500                                                    |                                                                                      |
| C                     | 3.09590600 -0.06722700 -0.65381000                                                  |                                                                                      |
| H                     | 3.86622100 0.57625500 -1.09477800                                                   |                                                                                      |
| H                     | 3.32867400 -1.09574000 -0.95486400                                                  |                                                                                      |
| C                     | 1.69683400 0.33922500 -1.18370900                                                   |                                                                                      |
| H                     | 1.48448700 1.36642800 -0.87428100                                                   |                                                                                      |
| H                     | 1.77637200 0.35845400 -2.28299700                                                   |                                                                                      |
| C                     | 0.61313400 -0.60285900 -0.76348800                                                  |                                                                                      |
| H                     | 0.85083200 -1.66419200 -0.82383400                                                  |                                                                                      |
| C                     | -0.69974000 -0.26195000 -0.35807300                                                 |                                                                                      |
| C                     | -1.62343400 -1.30217200 -0.03109000                                                 |                                                                                      |
| C                     | -1.17517500 1.07985700 -0.25439800                                                  |                                                                                      |
| C                     | -2.91999800 -1.02009400 0.37095900                                                  |                                                                                      |
| H                     | -1.29034200 -2.33444800 -0.09875600                                                 |                                                                                      |
| C                     | -2.47637400 1.35060300 0.14914500                                                   |                                                                                      |
| H                     | -0.51504100 1.90764000 -0.49060500                                                  |                                                                                      |
| C                     | -3.36088000 0.30929000 0.46528900                                                   |                                                                                      |
| H                     | -3.59640600 -1.83422200 0.61523800                                                  |                                                                                      |
| H                     | -2.80921200 2.38223800 0.22109500                                                   |                                                                                      |
| H                     | -4.37581000 0.52952700 0.78126300                                                   |                                                                                      |
| 10                    |  |  |
| Cartesian Coordinates |                                                                                     |                                                                                      |
| C                     | -1.57352100 0.78346400 -0.00464800                                                  |                                                                                      |
| C                     | -0.18249800 1.47831500 -0.02640600                                                  |                                                                                      |
| C                     | 0.54847300 0.09317100 -0.00202700                                                   |                                                                                      |
| C                     | -0.86863900 -0.59137400 0.00428300                                                  |                                                                                      |
| H                     | -2.17880700 0.95477300 0.88997000                                                   |                                                                                      |
| H                     | -2.19853000 0.93476000 -0.88919200                                                  |                                                                                      |

| No.                   | Species                                                                             | Optimized Structure                                                                  |
|-----------------------|-------------------------------------------------------------------------------------|--------------------------------------------------------------------------------------|
| H                     | 0.02283100 2.10421600 0.84628700                                                    |                                                                                      |
| H                     | 0.01079900 2.06438500 -0.92901900                                                   |                                                                                      |
| N                     | -1.24563500 -1.77060200 0.00956100                                                  |                                                                                      |
| C                     | 1.35805800 -0.23257100 -1.25892500                                                  |                                                                                      |
| H                     | 2.25414900 0.39893600 -1.29994000                                                   |                                                                                      |
| H                     | 1.67363400 -1.28075600 -1.25784000                                                  |                                                                                      |
| H                     | 0.77656600 -0.05597600 -2.16964300                                                  |                                                                                      |
| C                     | 1.33913500 -0.18946300 1.27792100                                                   |                                                                                      |
| H                     | 2.23497500 0.44293000 1.31062600                                                    |                                                                                      |
| H                     | 0.74420400 0.01888300 2.17315900                                                    |                                                                                      |
| H                     | 1.65357200 -1.23718800 1.31747400                                                   |                                                                                      |
| 11                    | 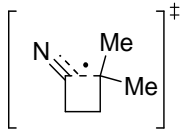   |    |
| Cartesian Coordinates |                                                                                     |                                                                                      |
| C                     | -1.16623900 -0.52631000 0.05267800                                                  |                                                                                      |
| N                     | -1.51315000 -1.66578400 0.11081300                                                  |                                                                                      |
| C                     | -1.44623900 0.95430300 -0.04669300                                                  |                                                                                      |
| H                     | -2.18811700 1.17704100 -0.82060000                                                  |                                                                                      |
| H                     | -1.83507000 1.31530100 0.91169900                                                   |                                                                                      |
| C                     | -0.00134200 1.42529200 -0.33812800                                                  |                                                                                      |
| H                     | 0.12770100 1.71235600 -1.38608200                                                   |                                                                                      |
| H                     | 0.32618000 2.26226000 0.28759800                                                    |                                                                                      |
| C                     | 0.70142400 0.09986000 -0.02130900                                                   |                                                                                      |
| C                     | 1.44535600 -0.60194700 -1.12649000                                                  |                                                                                      |
| H                     | 0.90326800 -0.55894500 -2.07609000                                                  |                                                                                      |
| H                     | 2.42932700 -0.13025100 -1.28177400                                                  |                                                                                      |
| H                     | 1.61538800 -1.65416200 -0.87788100                                                  |                                                                                      |
| C                     | 1.28068900 -0.05161300 1.36358000                                                   |                                                                                      |
| H                     | 1.44015800 -1.10549700 1.61160100                                                   |                                                                                      |
| H                     | 2.25575600 0.45866300 1.42166000                                                    |                                                                                      |
| H                     | 0.63557900 0.38621200 2.13234900                                                    |                                                                                      |
| 12                    |  |  |
| Cartesian Coordinates |                                                                                     |                                                                                      |
| C                     | -1.88934600 -0.05595400 0.24374600                                                  |                                                                                      |

| No.                   | Species                                                                             | Optimized Structure                                                                  |  |  |
|-----------------------|-------------------------------------------------------------------------------------|--------------------------------------------------------------------------------------|--|--|
| N                     | -2.50265700 -1.00265100 0.52239800                                                  |                                                                                      |  |  |
| C                     | -1.10614000 1.12695500 -0.12279700                                                  |                                                                                      |  |  |
| H                     | -1.75151100 1.79721500 -0.70338500                                                  |                                                                                      |  |  |
| H                     | -0.83606000 1.65828300 0.79681000                                                   |                                                                                      |  |  |
| C                     | 0.17993500 0.78702800 -0.94346900                                                   |                                                                                      |  |  |
| H                     | -0.12691500 0.29026000 -1.87055500                                                  |                                                                                      |  |  |
| H                     | 0.61518000 1.75717100 -1.22417600                                                   |                                                                                      |  |  |
| C                     | 1.19643200 -0.04131100 -0.21475200                                                  |                                                                                      |  |  |
| C                     | 1.24947800 -1.52532200 -0.41057100                                                  |                                                                                      |  |  |
| H                     | 0.58813300 -2.06103400 0.29231800                                                   |                                                                                      |  |  |
| H                     | 0.93434000 -1.81559300 -1.41905400                                                  |                                                                                      |  |  |
| H                     | 2.26236800 -1.91275800 -0.24278300                                                  |                                                                                      |  |  |
| C                     | 1.93823700 0.56471600 0.93790500                                                    |                                                                                      |  |  |
| H                     | 2.94205800 0.13282300 1.03775600                                                    |                                                                                      |  |  |
| H                     | 2.04673200 1.65097600 0.83209300                                                    |                                                                                      |  |  |
| H                     | 1.43269800 0.38453900 1.90381800                                                    |                                                                                      |  |  |
| 13                    | 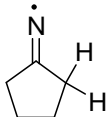  |   |  |  |
| Cartesian Coordinates |                                                                                     |                                                                                      |  |  |
| C                     | 1.33616000 -0.73204200 0.23931900                                                   |                                                                                      |  |  |
| C                     | 1.33619500 0.73203500 -0.23919200                                                   |                                                                                      |  |  |
| C                     | -0.06933300 1.24624100 0.12832000                                                   |                                                                                      |  |  |
| C                     | -0.96921300 -0.00000300 -0.00004600                                                 |                                                                                      |  |  |
| C                     | -0.06932400 -1.24623300 -0.12837600                                                 |                                                                                      |  |  |
| H                     | 2.13254800 -1.33095800 -0.21307700                                                  |                                                                                      |  |  |
| H                     | 1.47381600 -0.76853200 1.32719600                                                   |                                                                                      |  |  |
| H                     | 1.47399300 0.76852200 -1.32705100                                                   |                                                                                      |  |  |
| H                     | 2.13252900 1.33094300 0.21330600                                                    |                                                                                      |  |  |
| H                     | -0.10453500 1.58175500 1.17219900                                                   |                                                                                      |  |  |
| H                     | -0.43085200 2.06680400 -0.49598400                                                  |                                                                                      |  |  |
| H                     | -0.43091100 -2.06684000 0.49583100                                                  |                                                                                      |  |  |
| H                     | -0.10439900 -1.58167900 -1.17228200                                                 |                                                                                      |  |  |
| N                     | -2.21844300 0.00000000 -0.00004100                                                  |                                                                                      |  |  |
| 14                    |  |  |  |  |



| No.                   | Species                                                                             | Optimized Structure                                                                  |
|-----------------------|-------------------------------------------------------------------------------------|--------------------------------------------------------------------------------------|
| Cartesian Coordinates |                                                                                     |                                                                                      |
| C                     | -1.50503500 0.53307300 0.20469000                                                   |                                                                                      |
| C                     | -1.15626400 -0.87203800 -0.32690600                                                 |                                                                                      |
| C                     | 0.22996800 -1.24285200 0.21528800                                                   |                                                                                      |
| C                     | 1.19371000 -0.11618600 0.03246800                                                   |                                                                                      |
| C                     | -0.34467300 1.44845800 -0.05480400                                                  |                                                                                      |
| H                     | -2.42072100 0.89983300 -0.28220100                                                  |                                                                                      |
| H                     | -1.71376700 0.47818700 1.28000700                                                   |                                                                                      |
| H                     | -1.12665100 -0.85442100 -1.42318200                                                 |                                                                                      |
| H                     | -1.90111400 -1.61796300 -0.03048300                                                 |                                                                                      |
| H                     | 0.17367100 -1.45082200 1.29158700                                                   |                                                                                      |
| H                     | 0.64787400 -2.13097400 -0.26930200                                                  |                                                                                      |
| H                     | -0.00577400 2.13789900 0.71145300                                                   |                                                                                      |
| H                     | -0.15653600 1.76579100 -1.07753200                                                  |                                                                                      |
| N                     | 2.28525400 0.32424900 -0.08925300                                                   |                                                                                      |
| 15                    | 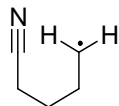   |    |
| Cartesian Coordinates |                                                                                     |                                                                                      |
| C                     | 1.66413400 -0.13227700 -0.15038700                                                  |                                                                                      |
| N                     | 2.46579600 -0.89669500 0.19998800                                                   |                                                                                      |
| C                     | 0.64243300 0.83196900 -0.57280600                                                   |                                                                                      |
| H                     | 1.13516300 1.79753700 -0.73416200                                                   |                                                                                      |
| H                     | 0.24550400 0.50412300 -1.54083500                                                   |                                                                                      |
| C                     | -0.50581600 0.98052700 0.45028000                                                   |                                                                                      |
| H                     | -0.09049500 1.30198100 1.41169700                                                   |                                                                                      |
| H                     | -1.15818800 1.78873900 0.09737500                                                   |                                                                                      |
| C                     | -1.33637500 -0.30280900 0.64720300                                                  |                                                                                      |
| H                     | -2.03883800 -0.11257000 1.47865000                                                  |                                                                                      |
| H                     | -0.68640600 -1.11557700 0.99419600                                                  |                                                                                      |
| C                     | -2.09506500 -0.72941600 -0.56560400                                                 |                                                                                      |
| H                     | -2.62947100 0.00268500 -1.16612200                                                  |                                                                                      |
| H                     | -2.25371100 -1.77801700 -0.79283600                                                 |                                                                                      |
| 16                    |  |  |
| Cartesian Coordinates |                                                                                     |                                                                                      |

| No.                   | Species                                                                            | Optimized Structure                                                                 |
|-----------------------|------------------------------------------------------------------------------------|-------------------------------------------------------------------------------------|
| C                     | -0.53294800 -1.28638400 -0.58702900                                                |                                                                                     |
| C                     | -1.52506700 -0.65903500 0.41112300                                                 |                                                                                     |
| C                     | -1.32357000 0.85632500 0.22942000                                                  |                                                                                     |
| C                     | 0.16634800 0.99405500 -0.13837800                                                  |                                                                                     |
| C                     | 0.73574100 -0.40362800 -0.50292100                                                 |                                                                                     |
| H                     | -0.31603500 -2.33800900 -0.37167300                                                |                                                                                     |
| H                     | -0.95186700 -1.23915100 -1.59991500                                                |                                                                                     |
| H                     | -1.27037600 -0.95242800 1.43640400                                                 |                                                                                     |
| H                     | -2.55984500 -0.96739800 0.23268900                                                 |                                                                                     |
| H                     | -1.91436000 1.23141900 -0.61569200                                                 |                                                                                     |
| H                     | -1.57805300 1.45943300 1.10431200                                                  |                                                                                     |
| H                     | 1.24596300 -0.33586500 -1.46911800                                                 |                                                                                     |
| N                     | 0.81959300 2.05819000 -0.14078000                                                  |                                                                                     |
| C                     | 1.74602900 -0.87839900 0.55541200                                                  |                                                                                     |
| H                     | 2.58317500 -0.17922900 0.63275300                                                  |                                                                                     |
| H                     | 1.28478800 -0.95961300 1.54590900                                                  |                                                                                     |
| H                     | 2.14026100 -1.86408900 0.28402300                                                  |                                                                                     |
| 17                    | 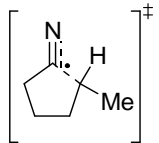 |  |
| Cartesian Coordinates |                                                                                    |                                                                                     |
| C                     | -0.44715500 -1.41489800 0.47116900                                                 |                                                                                     |
| C                     | 0.77037100 -1.39740200 -0.47716600                                                 |                                                                                     |
| C                     | 1.64520800 -0.20319900 -0.07911800                                                 |                                                                                     |
| C                     | 0.80608700 1.02283300 0.09147800                                                   |                                                                                     |
| C                     | -1.03939300 -0.02935700 0.55529900                                                 |                                                                                     |
| H                     | -1.19204400 -2.14057100 0.11268500                                                 |                                                                                     |
| H                     | -0.12446800 -1.74801400 1.46501800                                                 |                                                                                     |
| H                     | 0.43626700 -1.27617700 -1.51440100                                                 |                                                                                     |
| H                     | 1.33777600 -2.33245300 -0.42550800                                                 |                                                                                     |
| H                     | 2.14079400 -0.39759800 0.88098600                                                  |                                                                                     |
| H                     | 2.42627600 0.01334900 -0.81478200                                                  |                                                                                     |
| H                     | -1.19736000 0.38056500 1.55074700                                                  |                                                                                     |
| N                     | 0.67284400 2.20061600 0.08185200                                                   |                                                                                     |
| C                     | -2.01643500 0.43057500 -0.48750500                                                 |                                                                                     |
| H                     | -2.10692000 1.52064500 -0.48810200                                                 |                                                                                     |
| H                     | -1.72609700 0.11282200 -1.49527400                                                 |                                                                                     |
| H                     | -3.01623100 0.01180800 -0.28927900                                                 |                                                                                     |

| No.                                                                                                                                                                                                                                                                                                                                                                                                                                                                                                                                                                                                                                                                                                                                                                                                                                                                                                                                                                                                                                                                                                                                                                                                                                                                                                                                                                                                                                                              | Species                                                                             | Optimized Structure                                                                  |             |            |            |            |   |            |            |            |   |            |             |            |   |            |             |             |   |            |             |             |   |            |             |             |   |            |             |             |   |            |             |             |   |             |             |            |   |             |             |            |   |             |             |             |   |             |             |             |   |             |            |            |   |             |            |             |   |             |            |            |   |             |            |             |   |             |            |             |
|------------------------------------------------------------------------------------------------------------------------------------------------------------------------------------------------------------------------------------------------------------------------------------------------------------------------------------------------------------------------------------------------------------------------------------------------------------------------------------------------------------------------------------------------------------------------------------------------------------------------------------------------------------------------------------------------------------------------------------------------------------------------------------------------------------------------------------------------------------------------------------------------------------------------------------------------------------------------------------------------------------------------------------------------------------------------------------------------------------------------------------------------------------------------------------------------------------------------------------------------------------------------------------------------------------------------------------------------------------------------------------------------------------------------------------------------------------------|-------------------------------------------------------------------------------------|--------------------------------------------------------------------------------------|-------------|------------|------------|------------|---|------------|------------|------------|---|------------|-------------|------------|---|------------|-------------|-------------|---|------------|-------------|-------------|---|------------|-------------|-------------|---|------------|-------------|-------------|---|------------|-------------|-------------|---|-------------|-------------|------------|---|-------------|-------------|------------|---|-------------|-------------|-------------|---|-------------|-------------|-------------|---|-------------|------------|------------|---|-------------|------------|-------------|---|-------------|------------|------------|---|-------------|------------|-------------|---|-------------|------------|-------------|
| 18                                                                                                                                                                                                                                                                                                                                                                                                                                                                                                                                                                                                                                                                                                                                                                                                                                                                                                                                                                                                                                                                                                                                                                                                                                                                                                                                                                                                                                                               | 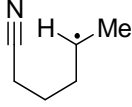   |    |             |            |            |            |   |            |            |            |   |            |             |            |   |            |             |             |   |            |             |             |   |            |             |             |   |            |             |             |   |            |             |             |   |             |             |            |   |             |             |            |   |             |             |             |   |             |             |             |   |             |            |            |   |             |            |             |   |             |            |            |   |             |            |             |   |             |            |             |
| <p>Cartesian Coordinates</p> <table border="1"> <tbody> <tr><td>C</td><td>1.65352100</td><td>0.62898100</td><td>0.05874500</td></tr> <tr><td>N</td><td>1.78065100</td><td>1.78404600</td><td>0.04944600</td></tr> <tr><td>C</td><td>1.53635100</td><td>-0.83350900</td><td>0.03657300</td></tr> <tr><td>H</td><td>2.37777300</td><td>-1.21377600</td><td>-0.55473800</td></tr> <tr><td>H</td><td>1.67569800</td><td>-1.20528500</td><td>1.05949700</td></tr> <tr><td>C</td><td>0.20733600</td><td>-1.36100200</td><td>-0.54792800</td></tr> <tr><td>H</td><td>0.02927000</td><td>-0.89258900</td><td>-1.52239600</td></tr> <tr><td>H</td><td>0.33784400</td><td>-2.43445100</td><td>-0.73149500</td></tr> <tr><td>C</td><td>-1.02785400</td><td>-1.16529900</td><td>0.37112400</td></tr> <tr><td>H</td><td>-0.83653800</td><td>-1.68354200</td><td>1.32003800</td></tr> <tr><td>H</td><td>-1.86237200</td><td>-1.69767400</td><td>-0.11224300</td></tr> <tr><td>C</td><td>-1.42775600</td><td>0.25263000</td><td>0.63398300</td></tr> <tr><td>H</td><td>-1.14810100</td><td>0.71263200</td><td>1.57802700</td></tr> <tr><td>C</td><td>-2.02396300</td><td>1.11899600</td><td>-0.42604200</td></tr> <tr><td>H</td><td>-2.71090400</td><td>1.85976200</td><td>0.00007800</td></tr> <tr><td>H</td><td>-1.25593600</td><td>1.69196700</td><td>-0.97284200</td></tr> <tr><td>H</td><td>-2.57709100</td><td>0.52984900</td><td>-1.16878900</td></tr> </tbody> </table> |                                                                                     |                                                                                      | C           | 1.65352100 | 0.62898100 | 0.05874500 | N | 1.78065100 | 1.78404600 | 0.04944600 | C | 1.53635100 | -0.83350900 | 0.03657300 | H | 2.37777300 | -1.21377600 | -0.55473800 | H | 1.67569800 | -1.20528500 | 1.05949700  | C | 0.20733600 | -1.36100200 | -0.54792800 | H | 0.02927000 | -0.89258900 | -1.52239600 | H | 0.33784400 | -2.43445100 | -0.73149500 | C | -1.02785400 | -1.16529900 | 0.37112400 | H | -0.83653800 | -1.68354200 | 1.32003800 | H | -1.86237200 | -1.69767400 | -0.11224300 | C | -1.42775600 | 0.25263000  | 0.63398300  | H | -1.14810100 | 0.71263200 | 1.57802700 | C | -2.02396300 | 1.11899600 | -0.42604200 | H | -2.71090400 | 1.85976200 | 0.00007800 | H | -1.25593600 | 1.69196700 | -0.97284200 | H | -2.57709100 | 0.52984900 | -1.16878900 |
| C                                                                                                                                                                                                                                                                                                                                                                                                                                                                                                                                                                                                                                                                                                                                                                                                                                                                                                                                                                                                                                                                                                                                                                                                                                                                                                                                                                                                                                                                | 1.65352100                                                                          | 0.62898100                                                                           | 0.05874500  |            |            |            |   |            |            |            |   |            |             |            |   |            |             |             |   |            |             |             |   |            |             |             |   |            |             |             |   |            |             |             |   |             |             |            |   |             |             |            |   |             |             |             |   |             |             |             |   |             |            |            |   |             |            |             |   |             |            |            |   |             |            |             |   |             |            |             |
| N                                                                                                                                                                                                                                                                                                                                                                                                                                                                                                                                                                                                                                                                                                                                                                                                                                                                                                                                                                                                                                                                                                                                                                                                                                                                                                                                                                                                                                                                | 1.78065100                                                                          | 1.78404600                                                                           | 0.04944600  |            |            |            |   |            |            |            |   |            |             |            |   |            |             |             |   |            |             |             |   |            |             |             |   |            |             |             |   |            |             |             |   |             |             |            |   |             |             |            |   |             |             |             |   |             |             |             |   |             |            |            |   |             |            |             |   |             |            |            |   |             |            |             |   |             |            |             |
| C                                                                                                                                                                                                                                                                                                                                                                                                                                                                                                                                                                                                                                                                                                                                                                                                                                                                                                                                                                                                                                                                                                                                                                                                                                                                                                                                                                                                                                                                | 1.53635100                                                                          | -0.83350900                                                                          | 0.03657300  |            |            |            |   |            |            |            |   |            |             |            |   |            |             |             |   |            |             |             |   |            |             |             |   |            |             |             |   |            |             |             |   |             |             |            |   |             |             |            |   |             |             |             |   |             |             |             |   |             |            |            |   |             |            |             |   |             |            |            |   |             |            |             |   |             |            |             |
| H                                                                                                                                                                                                                                                                                                                                                                                                                                                                                                                                                                                                                                                                                                                                                                                                                                                                                                                                                                                                                                                                                                                                                                                                                                                                                                                                                                                                                                                                | 2.37777300                                                                          | -1.21377600                                                                          | -0.55473800 |            |            |            |   |            |            |            |   |            |             |            |   |            |             |             |   |            |             |             |   |            |             |             |   |            |             |             |   |            |             |             |   |             |             |            |   |             |             |            |   |             |             |             |   |             |             |             |   |             |            |            |   |             |            |             |   |             |            |            |   |             |            |             |   |             |            |             |
| H                                                                                                                                                                                                                                                                                                                                                                                                                                                                                                                                                                                                                                                                                                                                                                                                                                                                                                                                                                                                                                                                                                                                                                                                                                                                                                                                                                                                                                                                | 1.67569800                                                                          | -1.20528500                                                                          | 1.05949700  |            |            |            |   |            |            |            |   |            |             |            |   |            |             |             |   |            |             |             |   |            |             |             |   |            |             |             |   |            |             |             |   |             |             |            |   |             |             |            |   |             |             |             |   |             |             |             |   |             |            |            |   |             |            |             |   |             |            |            |   |             |            |             |   |             |            |             |
| C                                                                                                                                                                                                                                                                                                                                                                                                                                                                                                                                                                                                                                                                                                                                                                                                                                                                                                                                                                                                                                                                                                                                                                                                                                                                                                                                                                                                                                                                | 0.20733600                                                                          | -1.36100200                                                                          | -0.54792800 |            |            |            |   |            |            |            |   |            |             |            |   |            |             |             |   |            |             |             |   |            |             |             |   |            |             |             |   |            |             |             |   |             |             |            |   |             |             |            |   |             |             |             |   |             |             |             |   |             |            |            |   |             |            |             |   |             |            |            |   |             |            |             |   |             |            |             |
| H                                                                                                                                                                                                                                                                                                                                                                                                                                                                                                                                                                                                                                                                                                                                                                                                                                                                                                                                                                                                                                                                                                                                                                                                                                                                                                                                                                                                                                                                | 0.02927000                                                                          | -0.89258900                                                                          | -1.52239600 |            |            |            |   |            |            |            |   |            |             |            |   |            |             |             |   |            |             |             |   |            |             |             |   |            |             |             |   |            |             |             |   |             |             |            |   |             |             |            |   |             |             |             |   |             |             |             |   |             |            |            |   |             |            |             |   |             |            |            |   |             |            |             |   |             |            |             |
| H                                                                                                                                                                                                                                                                                                                                                                                                                                                                                                                                                                                                                                                                                                                                                                                                                                                                                                                                                                                                                                                                                                                                                                                                                                                                                                                                                                                                                                                                | 0.33784400                                                                          | -2.43445100                                                                          | -0.73149500 |            |            |            |   |            |            |            |   |            |             |            |   |            |             |             |   |            |             |             |   |            |             |             |   |            |             |             |   |            |             |             |   |             |             |            |   |             |             |            |   |             |             |             |   |             |             |             |   |             |            |            |   |             |            |             |   |             |            |            |   |             |            |             |   |             |            |             |
| C                                                                                                                                                                                                                                                                                                                                                                                                                                                                                                                                                                                                                                                                                                                                                                                                                                                                                                                                                                                                                                                                                                                                                                                                                                                                                                                                                                                                                                                                | -1.02785400                                                                         | -1.16529900                                                                          | 0.37112400  |            |            |            |   |            |            |            |   |            |             |            |   |            |             |             |   |            |             |             |   |            |             |             |   |            |             |             |   |            |             |             |   |             |             |            |   |             |             |            |   |             |             |             |   |             |             |             |   |             |            |            |   |             |            |             |   |             |            |            |   |             |            |             |   |             |            |             |
| H                                                                                                                                                                                                                                                                                                                                                                                                                                                                                                                                                                                                                                                                                                                                                                                                                                                                                                                                                                                                                                                                                                                                                                                                                                                                                                                                                                                                                                                                | -0.83653800                                                                         | -1.68354200                                                                          | 1.32003800  |            |            |            |   |            |            |            |   |            |             |            |   |            |             |             |   |            |             |             |   |            |             |             |   |            |             |             |   |            |             |             |   |             |             |            |   |             |             |            |   |             |             |             |   |             |             |             |   |             |            |            |   |             |            |             |   |             |            |            |   |             |            |             |   |             |            |             |
| H                                                                                                                                                                                                                                                                                                                                                                                                                                                                                                                                                                                                                                                                                                                                                                                                                                                                                                                                                                                                                                                                                                                                                                                                                                                                                                                                                                                                                                                                | -1.86237200                                                                         | -1.69767400                                                                          | -0.11224300 |            |            |            |   |            |            |            |   |            |             |            |   |            |             |             |   |            |             |             |   |            |             |             |   |            |             |             |   |            |             |             |   |             |             |            |   |             |             |            |   |             |             |             |   |             |             |             |   |             |            |            |   |             |            |             |   |             |            |            |   |             |            |             |   |             |            |             |
| C                                                                                                                                                                                                                                                                                                                                                                                                                                                                                                                                                                                                                                                                                                                                                                                                                                                                                                                                                                                                                                                                                                                                                                                                                                                                                                                                                                                                                                                                | -1.42775600                                                                         | 0.25263000                                                                           | 0.63398300  |            |            |            |   |            |            |            |   |            |             |            |   |            |             |             |   |            |             |             |   |            |             |             |   |            |             |             |   |            |             |             |   |             |             |            |   |             |             |            |   |             |             |             |   |             |             |             |   |             |            |            |   |             |            |             |   |             |            |            |   |             |            |             |   |             |            |             |
| H                                                                                                                                                                                                                                                                                                                                                                                                                                                                                                                                                                                                                                                                                                                                                                                                                                                                                                                                                                                                                                                                                                                                                                                                                                                                                                                                                                                                                                                                | -1.14810100                                                                         | 0.71263200                                                                           | 1.57802700  |            |            |            |   |            |            |            |   |            |             |            |   |            |             |             |   |            |             |             |   |            |             |             |   |            |             |             |   |            |             |             |   |             |             |            |   |             |             |            |   |             |             |             |   |             |             |             |   |             |            |            |   |             |            |             |   |             |            |            |   |             |            |             |   |             |            |             |
| C                                                                                                                                                                                                                                                                                                                                                                                                                                                                                                                                                                                                                                                                                                                                                                                                                                                                                                                                                                                                                                                                                                                                                                                                                                                                                                                                                                                                                                                                | -2.02396300                                                                         | 1.11899600                                                                           | -0.42604200 |            |            |            |   |            |            |            |   |            |             |            |   |            |             |             |   |            |             |             |   |            |             |             |   |            |             |             |   |            |             |             |   |             |             |            |   |             |             |            |   |             |             |             |   |             |             |             |   |             |            |            |   |             |            |             |   |             |            |            |   |             |            |             |   |             |            |             |
| H                                                                                                                                                                                                                                                                                                                                                                                                                                                                                                                                                                                                                                                                                                                                                                                                                                                                                                                                                                                                                                                                                                                                                                                                                                                                                                                                                                                                                                                                | -2.71090400                                                                         | 1.85976200                                                                           | 0.00007800  |            |            |            |   |            |            |            |   |            |             |            |   |            |             |             |   |            |             |             |   |            |             |             |   |            |             |             |   |            |             |             |   |             |             |            |   |             |             |            |   |             |             |             |   |             |             |             |   |             |            |            |   |             |            |             |   |             |            |            |   |             |            |             |   |             |            |             |
| H                                                                                                                                                                                                                                                                                                                                                                                                                                                                                                                                                                                                                                                                                                                                                                                                                                                                                                                                                                                                                                                                                                                                                                                                                                                                                                                                                                                                                                                                | -1.25593600                                                                         | 1.69196700                                                                           | -0.97284200 |            |            |            |   |            |            |            |   |            |             |            |   |            |             |             |   |            |             |             |   |            |             |             |   |            |             |             |   |            |             |             |   |             |             |            |   |             |             |            |   |             |             |             |   |             |             |             |   |             |            |            |   |             |            |             |   |             |            |            |   |             |            |             |   |             |            |             |
| H                                                                                                                                                                                                                                                                                                                                                                                                                                                                                                                                                                                                                                                                                                                                                                                                                                                                                                                                                                                                                                                                                                                                                                                                                                                                                                                                                                                                                                                                | -2.57709100                                                                         | 0.52984900                                                                           | -1.16878900 |            |            |            |   |            |            |            |   |            |             |            |   |            |             |             |   |            |             |             |   |            |             |             |   |            |             |             |   |            |             |             |   |             |             |            |   |             |             |            |   |             |             |             |   |             |             |             |   |             |            |            |   |             |            |             |   |             |            |            |   |             |            |             |   |             |            |             |
| 19                                                                                                                                                                                                                                                                                                                                                                                                                                                                                                                                                                                                                                                                                                                                                                                                                                                                                                                                                                                                                                                                                                                                                                                                                                                                                                                                                                                                                                                               |  |  |             |            |            |            |   |            |            |            |   |            |             |            |   |            |             |             |   |            |             |             |   |            |             |             |   |            |             |             |   |            |             |             |   |             |             |            |   |             |             |            |   |             |             |             |   |             |             |             |   |             |            |            |   |             |            |             |   |             |            |            |   |             |            |             |   |             |            |             |
| <p>Cartesian Coordinates</p> <table border="1"> <tbody> <tr><td>C</td><td>1.47749400</td><td>1.56315600</td><td>0.23520600</td></tr> <tr><td>C</td><td>2.16132400</td><td>0.71410700</td><td>1.32030400</td></tr> <tr><td>C</td><td>2.77510000</td><td>-0.46194100</td><td>0.53835500</td></tr> <tr><td>C</td><td>1.81986000</td><td>-0.66114400</td><td>-0.65596900</td></tr> <tr><td>C</td><td>0.82480500</td><td>0.52782300</td><td>-0.72728000</td></tr> <tr><td>H</td><td>0.74369600</td><td>2.26791400</td><td>0.63608700</td></tr> <tr><td>H</td><td>2.23121600</td><td>2.14119400</td><td>-0.31436600</td></tr> <tr><td>H</td><td>1.41530700</td><td>0.34624700</td><td>2.03399300</td></tr> <tr><td>H</td><td>2.91066500</td><td>1.27463900</td><td>1.88751200</td></tr> <tr><td>H</td><td>3.76363200</td><td>-0.20085800</td><td>0.14165000</td></tr> <tr><td>H</td><td>2.88561600</td><td>-1.38312200</td><td>1.11647400</td></tr> <tr><td>N</td><td>1.86110300</td><td>-1.61270000</td><td>-1.46317300</td></tr> </tbody> </table>                                                                                                                                                                                                                                                                                                                                                                                                                   |                                                                                     |                                                                                      | C           | 1.47749400 | 1.56315600 | 0.23520600 | C | 2.16132400 | 0.71410700 | 1.32030400 | C | 2.77510000 | -0.46194100 | 0.53835500 | C | 1.81986000 | -0.66114400 | -0.65596900 | C | 0.82480500 | 0.52782300  | -0.72728000 | H | 0.74369600 | 2.26791400  | 0.63608700  | H | 2.23121600 | 2.14119400  | -0.31436600 | H | 1.41530700 | 0.34624700  | 2.03399300  | H | 2.91066500  | 1.27463900  | 1.88751200 | H | 3.76363200  | -0.20085800 | 0.14165000 | H | 2.88561600  | -1.38312200 | 1.11647400  | N | 1.86110300  | -1.61270000 | -1.46317300 |   |             |            |            |   |             |            |             |   |             |            |            |   |             |            |             |   |             |            |             |
| C                                                                                                                                                                                                                                                                                                                                                                                                                                                                                                                                                                                                                                                                                                                                                                                                                                                                                                                                                                                                                                                                                                                                                                                                                                                                                                                                                                                                                                                                | 1.47749400                                                                          | 1.56315600                                                                           | 0.23520600  |            |            |            |   |            |            |            |   |            |             |            |   |            |             |             |   |            |             |             |   |            |             |             |   |            |             |             |   |            |             |             |   |             |             |            |   |             |             |            |   |             |             |             |   |             |             |             |   |             |            |            |   |             |            |             |   |             |            |            |   |             |            |             |   |             |            |             |
| C                                                                                                                                                                                                                                                                                                                                                                                                                                                                                                                                                                                                                                                                                                                                                                                                                                                                                                                                                                                                                                                                                                                                                                                                                                                                                                                                                                                                                                                                | 2.16132400                                                                          | 0.71410700                                                                           | 1.32030400  |            |            |            |   |            |            |            |   |            |             |            |   |            |             |             |   |            |             |             |   |            |             |             |   |            |             |             |   |            |             |             |   |             |             |            |   |             |             |            |   |             |             |             |   |             |             |             |   |             |            |            |   |             |            |             |   |             |            |            |   |             |            |             |   |             |            |             |
| C                                                                                                                                                                                                                                                                                                                                                                                                                                                                                                                                                                                                                                                                                                                                                                                                                                                                                                                                                                                                                                                                                                                                                                                                                                                                                                                                                                                                                                                                | 2.77510000                                                                          | -0.46194100                                                                          | 0.53835500  |            |            |            |   |            |            |            |   |            |             |            |   |            |             |             |   |            |             |             |   |            |             |             |   |            |             |             |   |            |             |             |   |             |             |            |   |             |             |            |   |             |             |             |   |             |             |             |   |             |            |            |   |             |            |             |   |             |            |            |   |             |            |             |   |             |            |             |
| C                                                                                                                                                                                                                                                                                                                                                                                                                                                                                                                                                                                                                                                                                                                                                                                                                                                                                                                                                                                                                                                                                                                                                                                                                                                                                                                                                                                                                                                                | 1.81986000                                                                          | -0.66114400                                                                          | -0.65596900 |            |            |            |   |            |            |            |   |            |             |            |   |            |             |             |   |            |             |             |   |            |             |             |   |            |             |             |   |            |             |             |   |             |             |            |   |             |             |            |   |             |             |             |   |             |             |             |   |             |            |            |   |             |            |             |   |             |            |            |   |             |            |             |   |             |            |             |
| C                                                                                                                                                                                                                                                                                                                                                                                                                                                                                                                                                                                                                                                                                                                                                                                                                                                                                                                                                                                                                                                                                                                                                                                                                                                                                                                                                                                                                                                                | 0.82480500                                                                          | 0.52782300                                                                           | -0.72728000 |            |            |            |   |            |            |            |   |            |             |            |   |            |             |             |   |            |             |             |   |            |             |             |   |            |             |             |   |            |             |             |   |             |             |            |   |             |             |            |   |             |             |             |   |             |             |             |   |             |            |            |   |             |            |             |   |             |            |            |   |             |            |             |   |             |            |             |
| H                                                                                                                                                                                                                                                                                                                                                                                                                                                                                                                                                                                                                                                                                                                                                                                                                                                                                                                                                                                                                                                                                                                                                                                                                                                                                                                                                                                                                                                                | 0.74369600                                                                          | 2.26791400                                                                           | 0.63608700  |            |            |            |   |            |            |            |   |            |             |            |   |            |             |             |   |            |             |             |   |            |             |             |   |            |             |             |   |            |             |             |   |             |             |            |   |             |             |            |   |             |             |             |   |             |             |             |   |             |            |            |   |             |            |             |   |             |            |            |   |             |            |             |   |             |            |             |
| H                                                                                                                                                                                                                                                                                                                                                                                                                                                                                                                                                                                                                                                                                                                                                                                                                                                                                                                                                                                                                                                                                                                                                                                                                                                                                                                                                                                                                                                                | 2.23121600                                                                          | 2.14119400                                                                           | -0.31436600 |            |            |            |   |            |            |            |   |            |             |            |   |            |             |             |   |            |             |             |   |            |             |             |   |            |             |             |   |            |             |             |   |             |             |            |   |             |             |            |   |             |             |             |   |             |             |             |   |             |            |            |   |             |            |             |   |             |            |            |   |             |            |             |   |             |            |             |
| H                                                                                                                                                                                                                                                                                                                                                                                                                                                                                                                                                                                                                                                                                                                                                                                                                                                                                                                                                                                                                                                                                                                                                                                                                                                                                                                                                                                                                                                                | 1.41530700                                                                          | 0.34624700                                                                           | 2.03399300  |            |            |            |   |            |            |            |   |            |             |            |   |            |             |             |   |            |             |             |   |            |             |             |   |            |             |             |   |            |             |             |   |             |             |            |   |             |             |            |   |             |             |             |   |             |             |             |   |             |            |            |   |             |            |             |   |             |            |            |   |             |            |             |   |             |            |             |
| H                                                                                                                                                                                                                                                                                                                                                                                                                                                                                                                                                                                                                                                                                                                                                                                                                                                                                                                                                                                                                                                                                                                                                                                                                                                                                                                                                                                                                                                                | 2.91066500                                                                          | 1.27463900                                                                           | 1.88751200  |            |            |            |   |            |            |            |   |            |             |            |   |            |             |             |   |            |             |             |   |            |             |             |   |            |             |             |   |            |             |             |   |             |             |            |   |             |             |            |   |             |             |             |   |             |             |             |   |             |            |            |   |             |            |             |   |             |            |            |   |             |            |             |   |             |            |             |
| H                                                                                                                                                                                                                                                                                                                                                                                                                                                                                                                                                                                                                                                                                                                                                                                                                                                                                                                                                                                                                                                                                                                                                                                                                                                                                                                                                                                                                                                                | 3.76363200                                                                          | -0.20085800                                                                          | 0.14165000  |            |            |            |   |            |            |            |   |            |             |            |   |            |             |             |   |            |             |             |   |            |             |             |   |            |             |             |   |            |             |             |   |             |             |            |   |             |             |            |   |             |             |             |   |             |             |             |   |             |            |            |   |             |            |             |   |             |            |            |   |             |            |             |   |             |            |             |
| H                                                                                                                                                                                                                                                                                                                                                                                                                                                                                                                                                                                                                                                                                                                                                                                                                                                                                                                                                                                                                                                                                                                                                                                                                                                                                                                                                                                                                                                                | 2.88561600                                                                          | -1.38312200                                                                          | 1.11647400  |            |            |            |   |            |            |            |   |            |             |            |   |            |             |             |   |            |             |             |   |            |             |             |   |            |             |             |   |            |             |             |   |             |             |            |   |             |             |            |   |             |             |             |   |             |             |             |   |             |            |            |   |             |            |             |   |             |            |            |   |             |            |             |   |             |            |             |
| N                                                                                                                                                                                                                                                                                                                                                                                                                                                                                                                                                                                                                                                                                                                                                                                                                                                                                                                                                                                                                                                                                                                                                                                                                                                                                                                                                                                                                                                                | 1.86110300                                                                          | -1.61270000                                                                          | -1.46317300 |            |            |            |   |            |            |            |   |            |             |            |   |            |             |             |   |            |             |             |   |            |             |             |   |            |             |             |   |            |             |             |   |             |             |            |   |             |             |            |   |             |             |             |   |             |             |             |   |             |            |            |   |             |            |             |   |             |            |            |   |             |            |             |   |             |            |             |

| No.                   | Species                                                                           | Optimized Structure                                                                |  |  |
|-----------------------|-----------------------------------------------------------------------------------|------------------------------------------------------------------------------------|--|--|
| H                     | 0.80773300 0.90641500 -1.75387400                                                 |                                                                                    |  |  |
| C                     | -0.60389600 0.16827400 -0.33379900                                                |                                                                                    |  |  |
| C                     | -1.64309000 1.02380400 -0.73467400                                                |                                                                                    |  |  |
| C                     | -0.92965200 -0.95345400 0.44021200                                                |                                                                                    |  |  |
| C                     | -2.96550800 0.77415900 -0.36502500                                                |                                                                                    |  |  |
| H                     | -1.41400900 1.89200700 -1.34857800                                                |                                                                                    |  |  |
| C                     | -2.25330400 -1.20560500 0.81435700                                                |                                                                                    |  |  |
| H                     | -0.15447600 -1.65319400 0.73619800                                                |                                                                                    |  |  |
| C                     | -3.27598200 -0.34295700 0.41616600                                                |                                                                                    |  |  |
| H                     | -3.75277800 1.44693500 -0.69341800                                                |                                                                                    |  |  |
| H                     | -2.48278900 -2.08390300 1.41108700                                                |                                                                                    |  |  |
| H                     | -4.30443500 -0.54270500 0.70232700                                                |                                                                                    |  |  |
| 20                    | 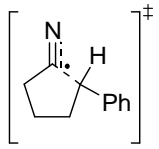 |  |  |  |
| Cartesian Coordinates |                                                                                   |                                                                                    |  |  |
| C                     | 1.66313600 -1.11445000 1.03978900                                                 |                                                                                    |  |  |
| C                     | 2.40854300 -1.26911500 -0.30145700                                                |                                                                                    |  |  |
| C                     | 2.89890800 0.12708600 -0.69317000                                                 |                                                                                    |  |  |
| C                     | 1.82773200 1.14343900 -0.40485300                                                 |                                                                                    |  |  |
| C                     | 0.72966300 0.07968600 0.97049400                                                  |                                                                                    |  |  |
| H                     | 1.11906700 -2.03207900 1.29476100                                                 |                                                                                    |  |  |
| H                     | 2.39655500 -0.94763500 1.83734900                                                 |                                                                                    |  |  |
| H                     | 1.72752200 -1.64770700 -1.07155600                                                |                                                                                    |  |  |
| H                     | 3.24105900 -1.97595800 -0.22476700                                                |                                                                                    |  |  |
| H                     | 3.77615700 0.40862200 -0.09640200                                                 |                                                                                    |  |  |
| H                     | 3.18055300 0.20466100 -1.74753100                                                 |                                                                                    |  |  |
| N                     | 1.44332300 2.25112200 -0.62776200                                                 |                                                                                    |  |  |
| C                     | -0.64042600 -0.03860700 0.47013600                                                |                                                                                    |  |  |
| C                     | -1.53765100 1.03624000 0.66122100                                                 |                                                                                    |  |  |
| C                     | -1.11742900 -1.17976600 -0.21152900                                               |                                                                                    |  |  |
| C                     | -2.84787700 0.97271300 0.19727900                                                 |                                                                                    |  |  |
| H                     | -1.18554200 1.93133800 1.16603100                                                 |                                                                                    |  |  |
| C                     | -2.43214600 -1.24395800 -0.67159100                                               |                                                                                    |  |  |
| H                     | -0.46232400 -2.02957000 -0.37506800                                               |                                                                                    |  |  |
| C                     | -3.30447000 -0.16937700 -0.47185700                                               |                                                                                    |  |  |
| H                     | -3.51614600 1.81436200 0.35520500                                                 |                                                                                    |  |  |
| H                     | -2.77748700 -2.13587900 -1.18689200                                               |                                                                                    |  |  |
| H                     | -4.32739200 -0.22045200 -0.83296800                                               |                                                                                    |  |  |
| H                     | 0.83682100 0.80909500 1.76940900                                                  |                                                                                    |  |  |

| No.                                                                                                                                                                                                                                                                                                                                                                                                                                                                                                                                                                                                                                                                                                                                                                                                                                                                                                                                                                                                                                                                                                                                                                                                                                                                                                                                                                                                                                                                                                                                                                                                                                                                                                                                                                                                                                                                                                                                                                                                                                      | Species                                                                             | Optimized Structure                                                                  |             |             |             |             |   |             |             |             |   |             |             |             |   |             |             |             |   |            |             |             |   |            |             |             |   |            |             |             |   |            |             |             |   |            |             |            |   |            |             |            |   |            |             |            |   |            |             |            |   |            |            |            |   |             |             |            |   |             |            |            |   |             |             |             |   |             |            |            |   |             |            |            |   |             |             |             |   |             |             |             |   |             |            |             |   |             |            |            |   |             |             |             |   |             |            |             |
|------------------------------------------------------------------------------------------------------------------------------------------------------------------------------------------------------------------------------------------------------------------------------------------------------------------------------------------------------------------------------------------------------------------------------------------------------------------------------------------------------------------------------------------------------------------------------------------------------------------------------------------------------------------------------------------------------------------------------------------------------------------------------------------------------------------------------------------------------------------------------------------------------------------------------------------------------------------------------------------------------------------------------------------------------------------------------------------------------------------------------------------------------------------------------------------------------------------------------------------------------------------------------------------------------------------------------------------------------------------------------------------------------------------------------------------------------------------------------------------------------------------------------------------------------------------------------------------------------------------------------------------------------------------------------------------------------------------------------------------------------------------------------------------------------------------------------------------------------------------------------------------------------------------------------------------------------------------------------------------------------------------------------------------|-------------------------------------------------------------------------------------|--------------------------------------------------------------------------------------|-------------|-------------|-------------|-------------|---|-------------|-------------|-------------|---|-------------|-------------|-------------|---|-------------|-------------|-------------|---|------------|-------------|-------------|---|------------|-------------|-------------|---|------------|-------------|-------------|---|------------|-------------|-------------|---|------------|-------------|------------|---|------------|-------------|------------|---|------------|-------------|------------|---|------------|-------------|------------|---|------------|------------|------------|---|-------------|-------------|------------|---|-------------|------------|------------|---|-------------|-------------|-------------|---|-------------|------------|------------|---|-------------|------------|------------|---|-------------|-------------|-------------|---|-------------|-------------|-------------|---|-------------|------------|-------------|---|-------------|------------|------------|---|-------------|-------------|-------------|---|-------------|------------|-------------|
| 21                                                                                                                                                                                                                                                                                                                                                                                                                                                                                                                                                                                                                                                                                                                                                                                                                                                                                                                                                                                                                                                                                                                                                                                                                                                                                                                                                                                                                                                                                                                                                                                                                                                                                                                                                                                                                                                                                                                                                                                                                                       | 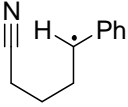   |    |             |             |             |             |   |             |             |             |   |             |             |             |   |             |             |             |   |            |             |             |   |            |             |             |   |            |             |             |   |            |             |             |   |            |             |            |   |            |             |            |   |            |             |            |   |            |             |            |   |            |            |            |   |             |             |            |   |             |            |            |   |             |             |             |   |             |            |            |   |             |            |            |   |             |             |             |   |             |             |             |   |             |            |             |   |             |            |            |   |             |             |             |   |             |            |             |
| <p>Cartesian Coordinates</p> <table border="1"> <tbody> <tr><td>C</td><td>2.92395600</td><td>1.13090300</td><td>-0.45395700</td></tr> <tr><td>N</td><td>2.62368400</td><td>2.24973100</td><td>-0.54254000</td></tr> <tr><td>C</td><td>3.34800500</td><td>-0.27092600</td><td>-0.35954600</td></tr> <tr><td>H</td><td>4.01740800</td><td>-0.46281500</td><td>-1.20650100</td></tr> <tr><td>H</td><td>3.95259500</td><td>-0.37976900</td><td>0.54979500</td></tr> <tr><td>C</td><td>2.20442700</td><td>-1.30903800</td><td>-0.36118800</td></tr> <tr><td>H</td><td>1.58798400</td><td>-1.17109200</td><td>-1.25577700</td></tr> <tr><td>H</td><td>2.67833500</td><td>-2.29466300</td><td>-0.44520200</td></tr> <tr><td>C</td><td>1.30695700</td><td>-1.30141700</td><td>0.90424300</td></tr> <tr><td>H</td><td>1.95762100</td><td>-1.34177800</td><td>1.78839400</td></tr> <tr><td>H</td><td>0.73637700</td><td>-2.23822500</td><td>0.90545900</td></tr> <tr><td>C</td><td>0.37919100</td><td>-0.12945500</td><td>1.02345200</td></tr> <tr><td>H</td><td>0.74738100</td><td>0.75555100</td><td>1.53522200</td></tr> <tr><td>C</td><td>-0.93013200</td><td>-0.05817000</td><td>0.48364400</td></tr> <tr><td>C</td><td>-1.69606900</td><td>1.13595300</td><td>0.64732700</td></tr> <tr><td>C</td><td>-1.54803600</td><td>-1.12998200</td><td>-0.22799700</td></tr> <tr><td>C</td><td>-2.98222900</td><td>1.24620800</td><td>0.14023500</td></tr> <tr><td>H</td><td>-1.24801700</td><td>1.97214400</td><td>1.17730800</td></tr> <tr><td>C</td><td>-2.83760800</td><td>-1.00901600</td><td>-0.73131200</td></tr> <tr><td>H</td><td>-1.00724600</td><td>-2.05862700</td><td>-0.38057500</td></tr> <tr><td>C</td><td>-3.56737900</td><td>0.17512000</td><td>-0.55351200</td></tr> <tr><td>H</td><td>-3.53784700</td><td>2.16927800</td><td>0.27999100</td></tr> <tr><td>H</td><td>-3.28260300</td><td>-1.84215200</td><td>-1.26859900</td></tr> <tr><td>H</td><td>-4.57427700</td><td>0.26295200</td><td>-0.95007400</td></tr> </tbody> </table> |                                                                                     |                                                                                      | C           | 2.92395600  | 1.13090300  | -0.45395700 | N | 2.62368400  | 2.24973100  | -0.54254000 | C | 3.34800500  | -0.27092600 | -0.35954600 | H | 4.01740800  | -0.46281500 | -1.20650100 | H | 3.95259500 | -0.37976900 | 0.54979500  | C | 2.20442700 | -1.30903800 | -0.36118800 | H | 1.58798400 | -1.17109200 | -1.25577700 | H | 2.67833500 | -2.29466300 | -0.44520200 | C | 1.30695700 | -1.30141700 | 0.90424300 | H | 1.95762100 | -1.34177800 | 1.78839400 | H | 0.73637700 | -2.23822500 | 0.90545900 | C | 0.37919100 | -0.12945500 | 1.02345200 | H | 0.74738100 | 0.75555100 | 1.53522200 | C | -0.93013200 | -0.05817000 | 0.48364400 | C | -1.69606900 | 1.13595300 | 0.64732700 | C | -1.54803600 | -1.12998200 | -0.22799700 | C | -2.98222900 | 1.24620800 | 0.14023500 | H | -1.24801700 | 1.97214400 | 1.17730800 | C | -2.83760800 | -1.00901600 | -0.73131200 | H | -1.00724600 | -2.05862700 | -0.38057500 | C | -3.56737900 | 0.17512000 | -0.55351200 | H | -3.53784700 | 2.16927800 | 0.27999100 | H | -3.28260300 | -1.84215200 | -1.26859900 | H | -4.57427700 | 0.26295200 | -0.95007400 |
| C                                                                                                                                                                                                                                                                                                                                                                                                                                                                                                                                                                                                                                                                                                                                                                                                                                                                                                                                                                                                                                                                                                                                                                                                                                                                                                                                                                                                                                                                                                                                                                                                                                                                                                                                                                                                                                                                                                                                                                                                                                        | 2.92395600                                                                          | 1.13090300                                                                           | -0.45395700 |             |             |             |   |             |             |             |   |             |             |             |   |             |             |             |   |            |             |             |   |            |             |             |   |            |             |             |   |            |             |             |   |            |             |            |   |            |             |            |   |            |             |            |   |            |             |            |   |            |            |            |   |             |             |            |   |             |            |            |   |             |             |             |   |             |            |            |   |             |            |            |   |             |             |             |   |             |             |             |   |             |            |             |   |             |            |            |   |             |             |             |   |             |            |             |
| N                                                                                                                                                                                                                                                                                                                                                                                                                                                                                                                                                                                                                                                                                                                                                                                                                                                                                                                                                                                                                                                                                                                                                                                                                                                                                                                                                                                                                                                                                                                                                                                                                                                                                                                                                                                                                                                                                                                                                                                                                                        | 2.62368400                                                                          | 2.24973100                                                                           | -0.54254000 |             |             |             |   |             |             |             |   |             |             |             |   |             |             |             |   |            |             |             |   |            |             |             |   |            |             |             |   |            |             |             |   |            |             |            |   |            |             |            |   |            |             |            |   |            |             |            |   |            |            |            |   |             |             |            |   |             |            |            |   |             |             |             |   |             |            |            |   |             |            |            |   |             |             |             |   |             |             |             |   |             |            |             |   |             |            |            |   |             |             |             |   |             |            |             |
| C                                                                                                                                                                                                                                                                                                                                                                                                                                                                                                                                                                                                                                                                                                                                                                                                                                                                                                                                                                                                                                                                                                                                                                                                                                                                                                                                                                                                                                                                                                                                                                                                                                                                                                                                                                                                                                                                                                                                                                                                                                        | 3.34800500                                                                          | -0.27092600                                                                          | -0.35954600 |             |             |             |   |             |             |             |   |             |             |             |   |             |             |             |   |            |             |             |   |            |             |             |   |            |             |             |   |            |             |             |   |            |             |            |   |            |             |            |   |            |             |            |   |            |             |            |   |            |            |            |   |             |             |            |   |             |            |            |   |             |             |             |   |             |            |            |   |             |            |            |   |             |             |             |   |             |             |             |   |             |            |             |   |             |            |            |   |             |             |             |   |             |            |             |
| H                                                                                                                                                                                                                                                                                                                                                                                                                                                                                                                                                                                                                                                                                                                                                                                                                                                                                                                                                                                                                                                                                                                                                                                                                                                                                                                                                                                                                                                                                                                                                                                                                                                                                                                                                                                                                                                                                                                                                                                                                                        | 4.01740800                                                                          | -0.46281500                                                                          | -1.20650100 |             |             |             |   |             |             |             |   |             |             |             |   |             |             |             |   |            |             |             |   |            |             |             |   |            |             |             |   |            |             |             |   |            |             |            |   |            |             |            |   |            |             |            |   |            |             |            |   |            |            |            |   |             |             |            |   |             |            |            |   |             |             |             |   |             |            |            |   |             |            |            |   |             |             |             |   |             |             |             |   |             |            |             |   |             |            |            |   |             |             |             |   |             |            |             |
| H                                                                                                                                                                                                                                                                                                                                                                                                                                                                                                                                                                                                                                                                                                                                                                                                                                                                                                                                                                                                                                                                                                                                                                                                                                                                                                                                                                                                                                                                                                                                                                                                                                                                                                                                                                                                                                                                                                                                                                                                                                        | 3.95259500                                                                          | -0.37976900                                                                          | 0.54979500  |             |             |             |   |             |             |             |   |             |             |             |   |             |             |             |   |            |             |             |   |            |             |             |   |            |             |             |   |            |             |             |   |            |             |            |   |            |             |            |   |            |             |            |   |            |             |            |   |            |            |            |   |             |             |            |   |             |            |            |   |             |             |             |   |             |            |            |   |             |            |            |   |             |             |             |   |             |             |             |   |             |            |             |   |             |            |            |   |             |             |             |   |             |            |             |
| C                                                                                                                                                                                                                                                                                                                                                                                                                                                                                                                                                                                                                                                                                                                                                                                                                                                                                                                                                                                                                                                                                                                                                                                                                                                                                                                                                                                                                                                                                                                                                                                                                                                                                                                                                                                                                                                                                                                                                                                                                                        | 2.20442700                                                                          | -1.30903800                                                                          | -0.36118800 |             |             |             |   |             |             |             |   |             |             |             |   |             |             |             |   |            |             |             |   |            |             |             |   |            |             |             |   |            |             |             |   |            |             |            |   |            |             |            |   |            |             |            |   |            |             |            |   |            |            |            |   |             |             |            |   |             |            |            |   |             |             |             |   |             |            |            |   |             |            |            |   |             |             |             |   |             |             |             |   |             |            |             |   |             |            |            |   |             |             |             |   |             |            |             |
| H                                                                                                                                                                                                                                                                                                                                                                                                                                                                                                                                                                                                                                                                                                                                                                                                                                                                                                                                                                                                                                                                                                                                                                                                                                                                                                                                                                                                                                                                                                                                                                                                                                                                                                                                                                                                                                                                                                                                                                                                                                        | 1.58798400                                                                          | -1.17109200                                                                          | -1.25577700 |             |             |             |   |             |             |             |   |             |             |             |   |             |             |             |   |            |             |             |   |            |             |             |   |            |             |             |   |            |             |             |   |            |             |            |   |            |             |            |   |            |             |            |   |            |             |            |   |            |            |            |   |             |             |            |   |             |            |            |   |             |             |             |   |             |            |            |   |             |            |            |   |             |             |             |   |             |             |             |   |             |            |             |   |             |            |            |   |             |             |             |   |             |            |             |
| H                                                                                                                                                                                                                                                                                                                                                                                                                                                                                                                                                                                                                                                                                                                                                                                                                                                                                                                                                                                                                                                                                                                                                                                                                                                                                                                                                                                                                                                                                                                                                                                                                                                                                                                                                                                                                                                                                                                                                                                                                                        | 2.67833500                                                                          | -2.29466300                                                                          | -0.44520200 |             |             |             |   |             |             |             |   |             |             |             |   |             |             |             |   |            |             |             |   |            |             |             |   |            |             |             |   |            |             |             |   |            |             |            |   |            |             |            |   |            |             |            |   |            |             |            |   |            |            |            |   |             |             |            |   |             |            |            |   |             |             |             |   |             |            |            |   |             |            |            |   |             |             |             |   |             |             |             |   |             |            |             |   |             |            |            |   |             |             |             |   |             |            |             |
| C                                                                                                                                                                                                                                                                                                                                                                                                                                                                                                                                                                                                                                                                                                                                                                                                                                                                                                                                                                                                                                                                                                                                                                                                                                                                                                                                                                                                                                                                                                                                                                                                                                                                                                                                                                                                                                                                                                                                                                                                                                        | 1.30695700                                                                          | -1.30141700                                                                          | 0.90424300  |             |             |             |   |             |             |             |   |             |             |             |   |             |             |             |   |            |             |             |   |            |             |             |   |            |             |             |   |            |             |             |   |            |             |            |   |            |             |            |   |            |             |            |   |            |             |            |   |            |            |            |   |             |             |            |   |             |            |            |   |             |             |             |   |             |            |            |   |             |            |            |   |             |             |             |   |             |             |             |   |             |            |             |   |             |            |            |   |             |             |             |   |             |            |             |
| H                                                                                                                                                                                                                                                                                                                                                                                                                                                                                                                                                                                                                                                                                                                                                                                                                                                                                                                                                                                                                                                                                                                                                                                                                                                                                                                                                                                                                                                                                                                                                                                                                                                                                                                                                                                                                                                                                                                                                                                                                                        | 1.95762100                                                                          | -1.34177800                                                                          | 1.78839400  |             |             |             |   |             |             |             |   |             |             |             |   |             |             |             |   |            |             |             |   |            |             |             |   |            |             |             |   |            |             |             |   |            |             |            |   |            |             |            |   |            |             |            |   |            |             |            |   |            |            |            |   |             |             |            |   |             |            |            |   |             |             |             |   |             |            |            |   |             |            |            |   |             |             |             |   |             |             |             |   |             |            |             |   |             |            |            |   |             |             |             |   |             |            |             |
| H                                                                                                                                                                                                                                                                                                                                                                                                                                                                                                                                                                                                                                                                                                                                                                                                                                                                                                                                                                                                                                                                                                                                                                                                                                                                                                                                                                                                                                                                                                                                                                                                                                                                                                                                                                                                                                                                                                                                                                                                                                        | 0.73637700                                                                          | -2.23822500                                                                          | 0.90545900  |             |             |             |   |             |             |             |   |             |             |             |   |             |             |             |   |            |             |             |   |            |             |             |   |            |             |             |   |            |             |             |   |            |             |            |   |            |             |            |   |            |             |            |   |            |             |            |   |            |            |            |   |             |             |            |   |             |            |            |   |             |             |             |   |             |            |            |   |             |            |            |   |             |             |             |   |             |             |             |   |             |            |             |   |             |            |            |   |             |             |             |   |             |            |             |
| C                                                                                                                                                                                                                                                                                                                                                                                                                                                                                                                                                                                                                                                                                                                                                                                                                                                                                                                                                                                                                                                                                                                                                                                                                                                                                                                                                                                                                                                                                                                                                                                                                                                                                                                                                                                                                                                                                                                                                                                                                                        | 0.37919100                                                                          | -0.12945500                                                                          | 1.02345200  |             |             |             |   |             |             |             |   |             |             |             |   |             |             |             |   |            |             |             |   |            |             |             |   |            |             |             |   |            |             |             |   |            |             |            |   |            |             |            |   |            |             |            |   |            |             |            |   |            |            |            |   |             |             |            |   |             |            |            |   |             |             |             |   |             |            |            |   |             |            |            |   |             |             |             |   |             |             |             |   |             |            |             |   |             |            |            |   |             |             |             |   |             |            |             |
| H                                                                                                                                                                                                                                                                                                                                                                                                                                                                                                                                                                                                                                                                                                                                                                                                                                                                                                                                                                                                                                                                                                                                                                                                                                                                                                                                                                                                                                                                                                                                                                                                                                                                                                                                                                                                                                                                                                                                                                                                                                        | 0.74738100                                                                          | 0.75555100                                                                           | 1.53522200  |             |             |             |   |             |             |             |   |             |             |             |   |             |             |             |   |            |             |             |   |            |             |             |   |            |             |             |   |            |             |             |   |            |             |            |   |            |             |            |   |            |             |            |   |            |             |            |   |            |            |            |   |             |             |            |   |             |            |            |   |             |             |             |   |             |            |            |   |             |            |            |   |             |             |             |   |             |             |             |   |             |            |             |   |             |            |            |   |             |             |             |   |             |            |             |
| C                                                                                                                                                                                                                                                                                                                                                                                                                                                                                                                                                                                                                                                                                                                                                                                                                                                                                                                                                                                                                                                                                                                                                                                                                                                                                                                                                                                                                                                                                                                                                                                                                                                                                                                                                                                                                                                                                                                                                                                                                                        | -0.93013200                                                                         | -0.05817000                                                                          | 0.48364400  |             |             |             |   |             |             |             |   |             |             |             |   |             |             |             |   |            |             |             |   |            |             |             |   |            |             |             |   |            |             |             |   |            |             |            |   |            |             |            |   |            |             |            |   |            |             |            |   |            |            |            |   |             |             |            |   |             |            |            |   |             |             |             |   |             |            |            |   |             |            |            |   |             |             |             |   |             |             |             |   |             |            |             |   |             |            |            |   |             |             |             |   |             |            |             |
| C                                                                                                                                                                                                                                                                                                                                                                                                                                                                                                                                                                                                                                                                                                                                                                                                                                                                                                                                                                                                                                                                                                                                                                                                                                                                                                                                                                                                                                                                                                                                                                                                                                                                                                                                                                                                                                                                                                                                                                                                                                        | -1.69606900                                                                         | 1.13595300                                                                           | 0.64732700  |             |             |             |   |             |             |             |   |             |             |             |   |             |             |             |   |            |             |             |   |            |             |             |   |            |             |             |   |            |             |             |   |            |             |            |   |            |             |            |   |            |             |            |   |            |             |            |   |            |            |            |   |             |             |            |   |             |            |            |   |             |             |             |   |             |            |            |   |             |            |            |   |             |             |             |   |             |             |             |   |             |            |             |   |             |            |            |   |             |             |             |   |             |            |             |
| C                                                                                                                                                                                                                                                                                                                                                                                                                                                                                                                                                                                                                                                                                                                                                                                                                                                                                                                                                                                                                                                                                                                                                                                                                                                                                                                                                                                                                                                                                                                                                                                                                                                                                                                                                                                                                                                                                                                                                                                                                                        | -1.54803600                                                                         | -1.12998200                                                                          | -0.22799700 |             |             |             |   |             |             |             |   |             |             |             |   |             |             |             |   |            |             |             |   |            |             |             |   |            |             |             |   |            |             |             |   |            |             |            |   |            |             |            |   |            |             |            |   |            |             |            |   |            |            |            |   |             |             |            |   |             |            |            |   |             |             |             |   |             |            |            |   |             |            |            |   |             |             |             |   |             |             |             |   |             |            |             |   |             |            |            |   |             |             |             |   |             |            |             |
| C                                                                                                                                                                                                                                                                                                                                                                                                                                                                                                                                                                                                                                                                                                                                                                                                                                                                                                                                                                                                                                                                                                                                                                                                                                                                                                                                                                                                                                                                                                                                                                                                                                                                                                                                                                                                                                                                                                                                                                                                                                        | -2.98222900                                                                         | 1.24620800                                                                           | 0.14023500  |             |             |             |   |             |             |             |   |             |             |             |   |             |             |             |   |            |             |             |   |            |             |             |   |            |             |             |   |            |             |             |   |            |             |            |   |            |             |            |   |            |             |            |   |            |             |            |   |            |            |            |   |             |             |            |   |             |            |            |   |             |             |             |   |             |            |            |   |             |            |            |   |             |             |             |   |             |             |             |   |             |            |             |   |             |            |            |   |             |             |             |   |             |            |             |
| H                                                                                                                                                                                                                                                                                                                                                                                                                                                                                                                                                                                                                                                                                                                                                                                                                                                                                                                                                                                                                                                                                                                                                                                                                                                                                                                                                                                                                                                                                                                                                                                                                                                                                                                                                                                                                                                                                                                                                                                                                                        | -1.24801700                                                                         | 1.97214400                                                                           | 1.17730800  |             |             |             |   |             |             |             |   |             |             |             |   |             |             |             |   |            |             |             |   |            |             |             |   |            |             |             |   |            |             |             |   |            |             |            |   |            |             |            |   |            |             |            |   |            |             |            |   |            |            |            |   |             |             |            |   |             |            |            |   |             |             |             |   |             |            |            |   |             |            |            |   |             |             |             |   |             |             |             |   |             |            |             |   |             |            |            |   |             |             |             |   |             |            |             |
| C                                                                                                                                                                                                                                                                                                                                                                                                                                                                                                                                                                                                                                                                                                                                                                                                                                                                                                                                                                                                                                                                                                                                                                                                                                                                                                                                                                                                                                                                                                                                                                                                                                                                                                                                                                                                                                                                                                                                                                                                                                        | -2.83760800                                                                         | -1.00901600                                                                          | -0.73131200 |             |             |             |   |             |             |             |   |             |             |             |   |             |             |             |   |            |             |             |   |            |             |             |   |            |             |             |   |            |             |             |   |            |             |            |   |            |             |            |   |            |             |            |   |            |             |            |   |            |            |            |   |             |             |            |   |             |            |            |   |             |             |             |   |             |            |            |   |             |            |            |   |             |             |             |   |             |             |             |   |             |            |             |   |             |            |            |   |             |             |             |   |             |            |             |
| H                                                                                                                                                                                                                                                                                                                                                                                                                                                                                                                                                                                                                                                                                                                                                                                                                                                                                                                                                                                                                                                                                                                                                                                                                                                                                                                                                                                                                                                                                                                                                                                                                                                                                                                                                                                                                                                                                                                                                                                                                                        | -1.00724600                                                                         | -2.05862700                                                                          | -0.38057500 |             |             |             |   |             |             |             |   |             |             |             |   |             |             |             |   |            |             |             |   |            |             |             |   |            |             |             |   |            |             |             |   |            |             |            |   |            |             |            |   |            |             |            |   |            |             |            |   |            |            |            |   |             |             |            |   |             |            |            |   |             |             |             |   |             |            |            |   |             |            |            |   |             |             |             |   |             |             |             |   |             |            |             |   |             |            |            |   |             |             |             |   |             |            |             |
| C                                                                                                                                                                                                                                                                                                                                                                                                                                                                                                                                                                                                                                                                                                                                                                                                                                                                                                                                                                                                                                                                                                                                                                                                                                                                                                                                                                                                                                                                                                                                                                                                                                                                                                                                                                                                                                                                                                                                                                                                                                        | -3.56737900                                                                         | 0.17512000                                                                           | -0.55351200 |             |             |             |   |             |             |             |   |             |             |             |   |             |             |             |   |            |             |             |   |            |             |             |   |            |             |             |   |            |             |             |   |            |             |            |   |            |             |            |   |            |             |            |   |            |             |            |   |            |            |            |   |             |             |            |   |             |            |            |   |             |             |             |   |             |            |            |   |             |            |            |   |             |             |             |   |             |             |             |   |             |            |             |   |             |            |            |   |             |             |             |   |             |            |             |
| H                                                                                                                                                                                                                                                                                                                                                                                                                                                                                                                                                                                                                                                                                                                                                                                                                                                                                                                                                                                                                                                                                                                                                                                                                                                                                                                                                                                                                                                                                                                                                                                                                                                                                                                                                                                                                                                                                                                                                                                                                                        | -3.53784700                                                                         | 2.16927800                                                                           | 0.27999100  |             |             |             |   |             |             |             |   |             |             |             |   |             |             |             |   |            |             |             |   |            |             |             |   |            |             |             |   |            |             |             |   |            |             |            |   |            |             |            |   |            |             |            |   |            |             |            |   |            |            |            |   |             |             |            |   |             |            |            |   |             |             |             |   |             |            |            |   |             |            |            |   |             |             |             |   |             |             |             |   |             |            |             |   |             |            |            |   |             |             |             |   |             |            |             |
| H                                                                                                                                                                                                                                                                                                                                                                                                                                                                                                                                                                                                                                                                                                                                                                                                                                                                                                                                                                                                                                                                                                                                                                                                                                                                                                                                                                                                                                                                                                                                                                                                                                                                                                                                                                                                                                                                                                                                                                                                                                        | -3.28260300                                                                         | -1.84215200                                                                          | -1.26859900 |             |             |             |   |             |             |             |   |             |             |             |   |             |             |             |   |            |             |             |   |            |             |             |   |            |             |             |   |            |             |             |   |            |             |            |   |            |             |            |   |            |             |            |   |            |             |            |   |            |            |            |   |             |             |            |   |             |            |            |   |             |             |             |   |             |            |            |   |             |            |            |   |             |             |             |   |             |             |             |   |             |            |             |   |             |            |            |   |             |             |             |   |             |            |             |
| H                                                                                                                                                                                                                                                                                                                                                                                                                                                                                                                                                                                                                                                                                                                                                                                                                                                                                                                                                                                                                                                                                                                                                                                                                                                                                                                                                                                                                                                                                                                                                                                                                                                                                                                                                                                                                                                                                                                                                                                                                                        | -4.57427700                                                                         | 0.26295200                                                                           | -0.95007400 |             |             |             |   |             |             |             |   |             |             |             |   |             |             |             |   |            |             |             |   |            |             |             |   |            |             |             |   |            |             |             |   |            |             |            |   |            |             |            |   |            |             |            |   |            |             |            |   |            |            |            |   |             |             |            |   |             |            |            |   |             |             |             |   |             |            |            |   |             |            |            |   |             |             |             |   |             |             |             |   |             |            |             |   |             |            |            |   |             |             |             |   |             |            |             |
| 22                                                                                                                                                                                                                                                                                                                                                                                                                                                                                                                                                                                                                                                                                                                                                                                                                                                                                                                                                                                                                                                                                                                                                                                                                                                                                                                                                                                                                                                                                                                                                                                                                                                                                                                                                                                                                                                                                                                                                                                                                                       |  |  |             |             |             |             |   |             |             |             |   |             |             |             |   |             |             |             |   |            |             |             |   |            |             |             |   |            |             |             |   |            |             |             |   |            |             |            |   |            |             |            |   |            |             |            |   |            |             |            |   |            |            |            |   |             |             |            |   |             |            |            |   |             |             |             |   |             |            |            |   |             |            |            |   |             |             |             |   |             |             |             |   |             |            |             |   |             |            |            |   |             |             |             |   |             |            |             |
| <p>Cartesian Coordinates</p> <table border="1"> <tbody> <tr><td>C</td><td>-0.36822600</td><td>-1.34993300</td><td>-0.46971400</td></tr> <tr><td>C</td><td>-1.72843200</td><td>-0.89559100</td><td>0.08735700</td></tr> <tr><td>C</td><td>-1.72053300</td><td>0.62944100</td><td>-0.12259300</td></tr> <tr><td>C</td><td>-0.23661200</td><td>1.02238100</td><td>0.00508800</td></tr> <tr><td>C</td><td>0.65037800</td><td>-0.26442800</td><td>-0.03136500</td></tr> </tbody> </table>                                                                                                                                                                                                                                                                                                                                                                                                                                                                                                                                                                                                                                                                                                                                                                                                                                                                                                                                                                                                                                                                                                                                                                                                                                                                                                                                                                                                                                                                                                                                                     |                                                                                     |                                                                                      | C           | -0.36822600 | -1.34993300 | -0.46971400 | C | -1.72843200 | -0.89559100 | 0.08735700  | C | -1.72053300 | 0.62944100  | -0.12259300 | C | -0.23661200 | 1.02238100  | 0.00508800  | C | 0.65037800 | -0.26442800 | -0.03136500 |   |            |             |             |   |            |             |             |   |            |             |             |   |            |             |            |   |            |             |            |   |            |             |            |   |            |             |            |   |            |            |            |   |             |             |            |   |             |            |            |   |             |             |             |   |             |            |            |   |             |            |            |   |             |             |             |   |             |             |             |   |             |            |             |   |             |            |            |   |             |             |             |   |             |            |             |
| C                                                                                                                                                                                                                                                                                                                                                                                                                                                                                                                                                                                                                                                                                                                                                                                                                                                                                                                                                                                                                                                                                                                                                                                                                                                                                                                                                                                                                                                                                                                                                                                                                                                                                                                                                                                                                                                                                                                                                                                                                                        | -0.36822600                                                                         | -1.34993300                                                                          | -0.46971400 |             |             |             |   |             |             |             |   |             |             |             |   |             |             |             |   |            |             |             |   |            |             |             |   |            |             |             |   |            |             |             |   |            |             |            |   |            |             |            |   |            |             |            |   |            |             |            |   |            |            |            |   |             |             |            |   |             |            |            |   |             |             |             |   |             |            |            |   |             |            |            |   |             |             |             |   |             |             |             |   |             |            |             |   |             |            |            |   |             |             |             |   |             |            |             |
| C                                                                                                                                                                                                                                                                                                                                                                                                                                                                                                                                                                                                                                                                                                                                                                                                                                                                                                                                                                                                                                                                                                                                                                                                                                                                                                                                                                                                                                                                                                                                                                                                                                                                                                                                                                                                                                                                                                                                                                                                                                        | -1.72843200                                                                         | -0.89559100                                                                          | 0.08735700  |             |             |             |   |             |             |             |   |             |             |             |   |             |             |             |   |            |             |             |   |            |             |             |   |            |             |             |   |            |             |             |   |            |             |            |   |            |             |            |   |            |             |            |   |            |             |            |   |            |            |            |   |             |             |            |   |             |            |            |   |             |             |             |   |             |            |            |   |             |            |            |   |             |             |             |   |             |             |             |   |             |            |             |   |             |            |            |   |             |             |             |   |             |            |             |
| C                                                                                                                                                                                                                                                                                                                                                                                                                                                                                                                                                                                                                                                                                                                                                                                                                                                                                                                                                                                                                                                                                                                                                                                                                                                                                                                                                                                                                                                                                                                                                                                                                                                                                                                                                                                                                                                                                                                                                                                                                                        | -1.72053300                                                                         | 0.62944100                                                                           | -0.12259300 |             |             |             |   |             |             |             |   |             |             |             |   |             |             |             |   |            |             |             |   |            |             |             |   |            |             |             |   |            |             |             |   |            |             |            |   |            |             |            |   |            |             |            |   |            |             |            |   |            |            |            |   |             |             |            |   |             |            |            |   |             |             |             |   |             |            |            |   |             |            |            |   |             |             |             |   |             |             |             |   |             |            |             |   |             |            |            |   |             |             |             |   |             |            |             |
| C                                                                                                                                                                                                                                                                                                                                                                                                                                                                                                                                                                                                                                                                                                                                                                                                                                                                                                                                                                                                                                                                                                                                                                                                                                                                                                                                                                                                                                                                                                                                                                                                                                                                                                                                                                                                                                                                                                                                                                                                                                        | -0.23661200                                                                         | 1.02238100                                                                           | 0.00508800  |             |             |             |   |             |             |             |   |             |             |             |   |             |             |             |   |            |             |             |   |            |             |             |   |            |             |             |   |            |             |             |   |            |             |            |   |            |             |            |   |            |             |            |   |            |             |            |   |            |            |            |   |             |             |            |   |             |            |            |   |             |             |             |   |             |            |            |   |             |            |            |   |             |             |             |   |             |             |             |   |             |            |             |   |             |            |            |   |             |             |             |   |             |            |             |
| C                                                                                                                                                                                                                                                                                                                                                                                                                                                                                                                                                                                                                                                                                                                                                                                                                                                                                                                                                                                                                                                                                                                                                                                                                                                                                                                                                                                                                                                                                                                                                                                                                                                                                                                                                                                                                                                                                                                                                                                                                                        | 0.65037800                                                                          | -0.26442800                                                                          | -0.03136500 |             |             |             |   |             |             |             |   |             |             |             |   |             |             |             |   |            |             |             |   |            |             |             |   |            |             |             |   |            |             |             |   |            |             |            |   |            |             |            |   |            |             |            |   |            |             |            |   |            |            |            |   |             |             |            |   |             |            |            |   |             |             |             |   |             |            |            |   |             |            |            |   |             |             |             |   |             |             |             |   |             |            |             |   |             |            |            |   |             |             |             |   |             |            |             |

| No.                   | Species                                                                           | Optimized Structure                                                                 |  |  |
|-----------------------|-----------------------------------------------------------------------------------|-------------------------------------------------------------------------------------|--|--|
| H                     | -0.07234300 -2.34657700 -0.12426100                                               |                                                                                     |  |  |
| H                     | -0.41395900 -1.38474500 -1.56612600                                               |                                                                                     |  |  |
| H                     | -1.80462400 -1.13080900 1.15521700                                                |                                                                                     |  |  |
| H                     | -2.57364500 -1.37970400 -0.41158800                                               |                                                                                     |  |  |
| H                     | -2.04789300 0.88563800 -1.13792400                                                |                                                                                     |  |  |
| H                     | -2.34552100 1.19069200 0.57631100                                                 |                                                                                     |  |  |
| N                     | 0.19508600 2.18681900 0.12610800                                                  |                                                                                     |  |  |
| C                     | 1.17537500 -0.53519700 1.39518700                                                 |                                                                                     |  |  |
| H                     | 0.36097400 -0.64699700 2.11833500                                                 |                                                                                     |  |  |
| H                     | 1.76585300 -1.45899700 1.40518400                                                 |                                                                                     |  |  |
| H                     | 1.81153700 0.28773800 1.73345400                                                  |                                                                                     |  |  |
| C                     | 1.82511100 -0.11817700 -1.00827000                                                |                                                                                     |  |  |
| H                     | 2.50354700 0.67892400 -0.69004200                                                 |                                                                                     |  |  |
| H                     | 2.39349000 -1.05455500 -1.05777300                                                |                                                                                     |  |  |
| H                     | 1.47462000 0.12068900 -2.01767700                                                 |                                                                                     |  |  |
| 23                    | 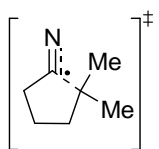 |  |  |  |
| Cartesian Coordinates |                                                                                   |                                                                                     |  |  |
| C                     | -0.07624700 -1.46859000 -0.35620600                                               |                                                                                     |  |  |
| C                     | -1.48166400 -1.17568700 0.20172900                                                |                                                                                     |  |  |
| C                     | -1.85465200 0.24658600 -0.23109700                                                |                                                                                     |  |  |
| C                     | -0.70529000 1.17803600 0.00008800                                                 |                                                                                     |  |  |
| C                     | 0.85214300 -0.31386900 -0.03955800                                                |                                                                                     |  |  |
| H                     | 0.31365000 -2.40803000 0.06444100                                                 |                                                                                     |  |  |
| H                     | -0.14077700 -1.60731000 -1.44288200                                               |                                                                                     |  |  |
| H                     | -1.47448200 -1.23693300 1.29610600                                                |                                                                                     |  |  |
| H                     | -2.21890600 -1.90075400 -0.15796300                                               |                                                                                     |  |  |
| H                     | -2.08100400 0.26914100 -1.30508000                                                |                                                                                     |  |  |
| H                     | -2.73068800 0.63640800 0.29675000                                                 |                                                                                     |  |  |
| N                     | -0.29810300 2.27741300 0.18680500                                                 |                                                                                     |  |  |
| C                     | 1.40109100 -0.24893600 1.36437500                                                 |                                                                                     |  |  |
| H                     | 1.76672800 0.75559400 1.59695400                                                  |                                                                                     |  |  |
| H                     | 0.65834200 -0.52275500 2.12046100                                                 |                                                                                     |  |  |
| H                     | 2.24866900 -0.94647800 1.46834600                                                 |                                                                                     |  |  |
| C                     | 1.79589700 0.15190300 -1.11612300                                                 |                                                                                     |  |  |
| H                     | 2.20054700 1.14131000 -0.88157100                                                 |                                                                                     |  |  |
| H                     | 2.64740500 -0.54301700 -1.20685300                                                |                                                                                     |  |  |
| H                     | 1.30957600 0.20427600 -2.09559500                                                 |                                                                                     |  |  |

| No.                                                                                                                                                                                                                                                                                                                                                                                                                                                                                                                                                                                                                                                                                                                                                                                                                                                                                                                                                                                                                                                                                                                                                                                                                                                                                                                                                                                                                                                                                                                                                                                                                                                                                                       | Species                                                                             | Optimized Structure                                                                  |             |             |             |             |   |             |             |            |   |             |             |             |   |             |             |            |   |             |             |             |   |             |             |            |   |             |             |            |   |             |             |            |   |             |             |             |   |            |             |             |   |            |             |            |   |            |             |             |   |            |            |            |   |            |            |            |   |            |            |            |   |            |             |            |   |            |            |             |   |            |            |             |   |            |            |             |   |            |            |             |
|-----------------------------------------------------------------------------------------------------------------------------------------------------------------------------------------------------------------------------------------------------------------------------------------------------------------------------------------------------------------------------------------------------------------------------------------------------------------------------------------------------------------------------------------------------------------------------------------------------------------------------------------------------------------------------------------------------------------------------------------------------------------------------------------------------------------------------------------------------------------------------------------------------------------------------------------------------------------------------------------------------------------------------------------------------------------------------------------------------------------------------------------------------------------------------------------------------------------------------------------------------------------------------------------------------------------------------------------------------------------------------------------------------------------------------------------------------------------------------------------------------------------------------------------------------------------------------------------------------------------------------------------------------------------------------------------------------------|-------------------------------------------------------------------------------------|--------------------------------------------------------------------------------------|-------------|-------------|-------------|-------------|---|-------------|-------------|------------|---|-------------|-------------|-------------|---|-------------|-------------|------------|---|-------------|-------------|-------------|---|-------------|-------------|------------|---|-------------|-------------|------------|---|-------------|-------------|------------|---|-------------|-------------|-------------|---|------------|-------------|-------------|---|------------|-------------|------------|---|------------|-------------|-------------|---|------------|------------|------------|---|------------|------------|------------|---|------------|------------|------------|---|------------|-------------|------------|---|------------|------------|-------------|---|------------|------------|-------------|---|------------|------------|-------------|---|------------|------------|-------------|
| 24                                                                                                                                                                                                                                                                                                                                                                                                                                                                                                                                                                                                                                                                                                                                                                                                                                                                                                                                                                                                                                                                                                                                                                                                                                                                                                                                                                                                                                                                                                                                                                                                                                                                                                        | 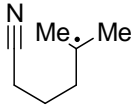   |    |             |             |             |             |   |             |             |            |   |             |             |             |   |             |             |            |   |             |             |             |   |             |             |            |   |             |             |            |   |             |             |            |   |             |             |             |   |            |             |             |   |            |             |            |   |            |             |             |   |            |            |            |   |            |            |            |   |            |            |            |   |            |             |            |   |            |            |             |   |            |            |             |   |            |            |             |   |            |            |             |
| <p>Cartesian Coordinates</p> <table border="1"> <tbody> <tr><td>C</td><td>-1.67467000</td><td>0.88024100</td><td>0.02692200</td></tr> <tr><td>N</td><td>-1.55576400</td><td>2.00056500</td><td>0.31236200</td></tr> <tr><td>C</td><td>-1.87441200</td><td>-0.53162400</td><td>-0.31863800</td></tr> <tr><td>H</td><td>-2.88271900</td><td>-0.80515700</td><td>0.01412500</td></tr> <tr><td>H</td><td>-1.86743500</td><td>-0.61987300</td><td>-1.41229500</td></tr> <tr><td>C</td><td>-0.83996600</td><td>-1.49669500</td><td>0.30209600</td></tr> <tr><td>H</td><td>-0.79769900</td><td>-1.33047300</td><td>1.38438100</td></tr> <tr><td>H</td><td>-1.21847100</td><td>-2.51552100</td><td>0.15351300</td></tr> <tr><td>C</td><td>0.58174400</td><td>-1.40269100</td><td>-0.30718900</td></tr> <tr><td>H</td><td>0.51276600</td><td>-1.60958800</td><td>-1.38334600</td></tr> <tr><td>H</td><td>1.15804700</td><td>-2.23617500</td><td>0.12991900</td></tr> <tr><td>C</td><td>1.31092000</td><td>-0.11086900</td><td>-0.07924400</td></tr> <tr><td>C</td><td>1.70759600</td><td>0.29051300</td><td>1.30918400</td></tr> <tr><td>H</td><td>2.77045400</td><td>0.57297100</td><td>1.35492500</td></tr> <tr><td>H</td><td>1.14247900</td><td>1.17019500</td><td>1.65675500</td></tr> <tr><td>H</td><td>1.54623400</td><td>-0.51248900</td><td>2.03720400</td></tr> <tr><td>C</td><td>1.66190600</td><td>0.81415200</td><td>-1.20298300</td></tr> <tr><td>H</td><td>1.39389900</td><td>0.40043700</td><td>-2.18096100</td></tr> <tr><td>H</td><td>1.15332400</td><td>1.78644200</td><td>-1.10175900</td></tr> <tr><td>H</td><td>2.74076100</td><td>1.03711200</td><td>-1.21988200</td></tr> </tbody> </table> |                                                                                     |                                                                                      | C           | -1.67467000 | 0.88024100  | 0.02692200  | N | -1.55576400 | 2.00056500  | 0.31236200 | C | -1.87441200 | -0.53162400 | -0.31863800 | H | -2.88271900 | -0.80515700 | 0.01412500 | H | -1.86743500 | -0.61987300 | -1.41229500 | C | -0.83996600 | -1.49669500 | 0.30209600 | H | -0.79769900 | -1.33047300 | 1.38438100 | H | -1.21847100 | -2.51552100 | 0.15351300 | C | 0.58174400  | -1.40269100 | -0.30718900 | H | 0.51276600 | -1.60958800 | -1.38334600 | H | 1.15804700 | -2.23617500 | 0.12991900 | C | 1.31092000 | -0.11086900 | -0.07924400 | C | 1.70759600 | 0.29051300 | 1.30918400 | H | 2.77045400 | 0.57297100 | 1.35492500 | H | 1.14247900 | 1.17019500 | 1.65675500 | H | 1.54623400 | -0.51248900 | 2.03720400 | C | 1.66190600 | 0.81415200 | -1.20298300 | H | 1.39389900 | 0.40043700 | -2.18096100 | H | 1.15332400 | 1.78644200 | -1.10175900 | H | 2.74076100 | 1.03711200 | -1.21988200 |
| C                                                                                                                                                                                                                                                                                                                                                                                                                                                                                                                                                                                                                                                                                                                                                                                                                                                                                                                                                                                                                                                                                                                                                                                                                                                                                                                                                                                                                                                                                                                                                                                                                                                                                                         | -1.67467000                                                                         | 0.88024100                                                                           | 0.02692200  |             |             |             |   |             |             |            |   |             |             |             |   |             |             |            |   |             |             |             |   |             |             |            |   |             |             |            |   |             |             |            |   |             |             |             |   |            |             |             |   |            |             |            |   |            |             |             |   |            |            |            |   |            |            |            |   |            |            |            |   |            |             |            |   |            |            |             |   |            |            |             |   |            |            |             |   |            |            |             |
| N                                                                                                                                                                                                                                                                                                                                                                                                                                                                                                                                                                                                                                                                                                                                                                                                                                                                                                                                                                                                                                                                                                                                                                                                                                                                                                                                                                                                                                                                                                                                                                                                                                                                                                         | -1.55576400                                                                         | 2.00056500                                                                           | 0.31236200  |             |             |             |   |             |             |            |   |             |             |             |   |             |             |            |   |             |             |             |   |             |             |            |   |             |             |            |   |             |             |            |   |             |             |             |   |            |             |             |   |            |             |            |   |            |             |             |   |            |            |            |   |            |            |            |   |            |            |            |   |            |             |            |   |            |            |             |   |            |            |             |   |            |            |             |   |            |            |             |
| C                                                                                                                                                                                                                                                                                                                                                                                                                                                                                                                                                                                                                                                                                                                                                                                                                                                                                                                                                                                                                                                                                                                                                                                                                                                                                                                                                                                                                                                                                                                                                                                                                                                                                                         | -1.87441200                                                                         | -0.53162400                                                                          | -0.31863800 |             |             |             |   |             |             |            |   |             |             |             |   |             |             |            |   |             |             |             |   |             |             |            |   |             |             |            |   |             |             |            |   |             |             |             |   |            |             |             |   |            |             |            |   |            |             |             |   |            |            |            |   |            |            |            |   |            |            |            |   |            |             |            |   |            |            |             |   |            |            |             |   |            |            |             |   |            |            |             |
| H                                                                                                                                                                                                                                                                                                                                                                                                                                                                                                                                                                                                                                                                                                                                                                                                                                                                                                                                                                                                                                                                                                                                                                                                                                                                                                                                                                                                                                                                                                                                                                                                                                                                                                         | -2.88271900                                                                         | -0.80515700                                                                          | 0.01412500  |             |             |             |   |             |             |            |   |             |             |             |   |             |             |            |   |             |             |             |   |             |             |            |   |             |             |            |   |             |             |            |   |             |             |             |   |            |             |             |   |            |             |            |   |            |             |             |   |            |            |            |   |            |            |            |   |            |            |            |   |            |             |            |   |            |            |             |   |            |            |             |   |            |            |             |   |            |            |             |
| H                                                                                                                                                                                                                                                                                                                                                                                                                                                                                                                                                                                                                                                                                                                                                                                                                                                                                                                                                                                                                                                                                                                                                                                                                                                                                                                                                                                                                                                                                                                                                                                                                                                                                                         | -1.86743500                                                                         | -0.61987300                                                                          | -1.41229500 |             |             |             |   |             |             |            |   |             |             |             |   |             |             |            |   |             |             |             |   |             |             |            |   |             |             |            |   |             |             |            |   |             |             |             |   |            |             |             |   |            |             |            |   |            |             |             |   |            |            |            |   |            |            |            |   |            |            |            |   |            |             |            |   |            |            |             |   |            |            |             |   |            |            |             |   |            |            |             |
| C                                                                                                                                                                                                                                                                                                                                                                                                                                                                                                                                                                                                                                                                                                                                                                                                                                                                                                                                                                                                                                                                                                                                                                                                                                                                                                                                                                                                                                                                                                                                                                                                                                                                                                         | -0.83996600                                                                         | -1.49669500                                                                          | 0.30209600  |             |             |             |   |             |             |            |   |             |             |             |   |             |             |            |   |             |             |             |   |             |             |            |   |             |             |            |   |             |             |            |   |             |             |             |   |            |             |             |   |            |             |            |   |            |             |             |   |            |            |            |   |            |            |            |   |            |            |            |   |            |             |            |   |            |            |             |   |            |            |             |   |            |            |             |   |            |            |             |
| H                                                                                                                                                                                                                                                                                                                                                                                                                                                                                                                                                                                                                                                                                                                                                                                                                                                                                                                                                                                                                                                                                                                                                                                                                                                                                                                                                                                                                                                                                                                                                                                                                                                                                                         | -0.79769900                                                                         | -1.33047300                                                                          | 1.38438100  |             |             |             |   |             |             |            |   |             |             |             |   |             |             |            |   |             |             |             |   |             |             |            |   |             |             |            |   |             |             |            |   |             |             |             |   |            |             |             |   |            |             |            |   |            |             |             |   |            |            |            |   |            |            |            |   |            |            |            |   |            |             |            |   |            |            |             |   |            |            |             |   |            |            |             |   |            |            |             |
| H                                                                                                                                                                                                                                                                                                                                                                                                                                                                                                                                                                                                                                                                                                                                                                                                                                                                                                                                                                                                                                                                                                                                                                                                                                                                                                                                                                                                                                                                                                                                                                                                                                                                                                         | -1.21847100                                                                         | -2.51552100                                                                          | 0.15351300  |             |             |             |   |             |             |            |   |             |             |             |   |             |             |            |   |             |             |             |   |             |             |            |   |             |             |            |   |             |             |            |   |             |             |             |   |            |             |             |   |            |             |            |   |            |             |             |   |            |            |            |   |            |            |            |   |            |            |            |   |            |             |            |   |            |            |             |   |            |            |             |   |            |            |             |   |            |            |             |
| C                                                                                                                                                                                                                                                                                                                                                                                                                                                                                                                                                                                                                                                                                                                                                                                                                                                                                                                                                                                                                                                                                                                                                                                                                                                                                                                                                                                                                                                                                                                                                                                                                                                                                                         | 0.58174400                                                                          | -1.40269100                                                                          | -0.30718900 |             |             |             |   |             |             |            |   |             |             |             |   |             |             |            |   |             |             |             |   |             |             |            |   |             |             |            |   |             |             |            |   |             |             |             |   |            |             |             |   |            |             |            |   |            |             |             |   |            |            |            |   |            |            |            |   |            |            |            |   |            |             |            |   |            |            |             |   |            |            |             |   |            |            |             |   |            |            |             |
| H                                                                                                                                                                                                                                                                                                                                                                                                                                                                                                                                                                                                                                                                                                                                                                                                                                                                                                                                                                                                                                                                                                                                                                                                                                                                                                                                                                                                                                                                                                                                                                                                                                                                                                         | 0.51276600                                                                          | -1.60958800                                                                          | -1.38334600 |             |             |             |   |             |             |            |   |             |             |             |   |             |             |            |   |             |             |             |   |             |             |            |   |             |             |            |   |             |             |            |   |             |             |             |   |            |             |             |   |            |             |            |   |            |             |             |   |            |            |            |   |            |            |            |   |            |            |            |   |            |             |            |   |            |            |             |   |            |            |             |   |            |            |             |   |            |            |             |
| H                                                                                                                                                                                                                                                                                                                                                                                                                                                                                                                                                                                                                                                                                                                                                                                                                                                                                                                                                                                                                                                                                                                                                                                                                                                                                                                                                                                                                                                                                                                                                                                                                                                                                                         | 1.15804700                                                                          | -2.23617500                                                                          | 0.12991900  |             |             |             |   |             |             |            |   |             |             |             |   |             |             |            |   |             |             |             |   |             |             |            |   |             |             |            |   |             |             |            |   |             |             |             |   |            |             |             |   |            |             |            |   |            |             |             |   |            |            |            |   |            |            |            |   |            |            |            |   |            |             |            |   |            |            |             |   |            |            |             |   |            |            |             |   |            |            |             |
| C                                                                                                                                                                                                                                                                                                                                                                                                                                                                                                                                                                                                                                                                                                                                                                                                                                                                                                                                                                                                                                                                                                                                                                                                                                                                                                                                                                                                                                                                                                                                                                                                                                                                                                         | 1.31092000                                                                          | -0.11086900                                                                          | -0.07924400 |             |             |             |   |             |             |            |   |             |             |             |   |             |             |            |   |             |             |             |   |             |             |            |   |             |             |            |   |             |             |            |   |             |             |             |   |            |             |             |   |            |             |            |   |            |             |             |   |            |            |            |   |            |            |            |   |            |            |            |   |            |             |            |   |            |            |             |   |            |            |             |   |            |            |             |   |            |            |             |
| C                                                                                                                                                                                                                                                                                                                                                                                                                                                                                                                                                                                                                                                                                                                                                                                                                                                                                                                                                                                                                                                                                                                                                                                                                                                                                                                                                                                                                                                                                                                                                                                                                                                                                                         | 1.70759600                                                                          | 0.29051300                                                                           | 1.30918400  |             |             |             |   |             |             |            |   |             |             |             |   |             |             |            |   |             |             |             |   |             |             |            |   |             |             |            |   |             |             |            |   |             |             |             |   |            |             |             |   |            |             |            |   |            |             |             |   |            |            |            |   |            |            |            |   |            |            |            |   |            |             |            |   |            |            |             |   |            |            |             |   |            |            |             |   |            |            |             |
| H                                                                                                                                                                                                                                                                                                                                                                                                                                                                                                                                                                                                                                                                                                                                                                                                                                                                                                                                                                                                                                                                                                                                                                                                                                                                                                                                                                                                                                                                                                                                                                                                                                                                                                         | 2.77045400                                                                          | 0.57297100                                                                           | 1.35492500  |             |             |             |   |             |             |            |   |             |             |             |   |             |             |            |   |             |             |             |   |             |             |            |   |             |             |            |   |             |             |            |   |             |             |             |   |            |             |             |   |            |             |            |   |            |             |             |   |            |            |            |   |            |            |            |   |            |            |            |   |            |             |            |   |            |            |             |   |            |            |             |   |            |            |             |   |            |            |             |
| H                                                                                                                                                                                                                                                                                                                                                                                                                                                                                                                                                                                                                                                                                                                                                                                                                                                                                                                                                                                                                                                                                                                                                                                                                                                                                                                                                                                                                                                                                                                                                                                                                                                                                                         | 1.14247900                                                                          | 1.17019500                                                                           | 1.65675500  |             |             |             |   |             |             |            |   |             |             |             |   |             |             |            |   |             |             |             |   |             |             |            |   |             |             |            |   |             |             |            |   |             |             |             |   |            |             |             |   |            |             |            |   |            |             |             |   |            |            |            |   |            |            |            |   |            |            |            |   |            |             |            |   |            |            |             |   |            |            |             |   |            |            |             |   |            |            |             |
| H                                                                                                                                                                                                                                                                                                                                                                                                                                                                                                                                                                                                                                                                                                                                                                                                                                                                                                                                                                                                                                                                                                                                                                                                                                                                                                                                                                                                                                                                                                                                                                                                                                                                                                         | 1.54623400                                                                          | -0.51248900                                                                          | 2.03720400  |             |             |             |   |             |             |            |   |             |             |             |   |             |             |            |   |             |             |             |   |             |             |            |   |             |             |            |   |             |             |            |   |             |             |             |   |            |             |             |   |            |             |            |   |            |             |             |   |            |            |            |   |            |            |            |   |            |            |            |   |            |             |            |   |            |            |             |   |            |            |             |   |            |            |             |   |            |            |             |
| C                                                                                                                                                                                                                                                                                                                                                                                                                                                                                                                                                                                                                                                                                                                                                                                                                                                                                                                                                                                                                                                                                                                                                                                                                                                                                                                                                                                                                                                                                                                                                                                                                                                                                                         | 1.66190600                                                                          | 0.81415200                                                                           | -1.20298300 |             |             |             |   |             |             |            |   |             |             |             |   |             |             |            |   |             |             |             |   |             |             |            |   |             |             |            |   |             |             |            |   |             |             |             |   |            |             |             |   |            |             |            |   |            |             |             |   |            |            |            |   |            |            |            |   |            |            |            |   |            |             |            |   |            |            |             |   |            |            |             |   |            |            |             |   |            |            |             |
| H                                                                                                                                                                                                                                                                                                                                                                                                                                                                                                                                                                                                                                                                                                                                                                                                                                                                                                                                                                                                                                                                                                                                                                                                                                                                                                                                                                                                                                                                                                                                                                                                                                                                                                         | 1.39389900                                                                          | 0.40043700                                                                           | -2.18096100 |             |             |             |   |             |             |            |   |             |             |             |   |             |             |            |   |             |             |             |   |             |             |            |   |             |             |            |   |             |             |            |   |             |             |             |   |            |             |             |   |            |             |            |   |            |             |             |   |            |            |            |   |            |            |            |   |            |            |            |   |            |             |            |   |            |            |             |   |            |            |             |   |            |            |             |   |            |            |             |
| H                                                                                                                                                                                                                                                                                                                                                                                                                                                                                                                                                                                                                                                                                                                                                                                                                                                                                                                                                                                                                                                                                                                                                                                                                                                                                                                                                                                                                                                                                                                                                                                                                                                                                                         | 1.15332400                                                                          | 1.78644200                                                                           | -1.10175900 |             |             |             |   |             |             |            |   |             |             |             |   |             |             |            |   |             |             |             |   |             |             |            |   |             |             |            |   |             |             |            |   |             |             |             |   |            |             |             |   |            |             |            |   |            |             |             |   |            |            |            |   |            |            |            |   |            |            |            |   |            |             |            |   |            |            |             |   |            |            |             |   |            |            |             |   |            |            |             |
| H                                                                                                                                                                                                                                                                                                                                                                                                                                                                                                                                                                                                                                                                                                                                                                                                                                                                                                                                                                                                                                                                                                                                                                                                                                                                                                                                                                                                                                                                                                                                                                                                                                                                                                         | 2.74076100                                                                          | 1.03711200                                                                           | -1.21988200 |             |             |             |   |             |             |            |   |             |             |             |   |             |             |            |   |             |             |             |   |             |             |            |   |             |             |            |   |             |             |            |   |             |             |             |   |            |             |             |   |            |             |            |   |            |             |             |   |            |            |            |   |            |            |            |   |            |            |            |   |            |             |            |   |            |            |             |   |            |            |             |   |            |            |             |   |            |            |             |
| 25                                                                                                                                                                                                                                                                                                                                                                                                                                                                                                                                                                                                                                                                                                                                                                                                                                                                                                                                                                                                                                                                                                                                                                                                                                                                                                                                                                                                                                                                                                                                                                                                                                                                                                        |  |  |             |             |             |             |   |             |             |            |   |             |             |             |   |             |             |            |   |             |             |             |   |             |             |            |   |             |             |            |   |             |             |            |   |             |             |             |   |            |             |             |   |            |             |            |   |            |             |             |   |            |            |            |   |            |            |            |   |            |            |            |   |            |             |            |   |            |            |             |   |            |            |             |   |            |            |             |   |            |            |             |
| <p>Cartesian Coordinates</p> <table border="1"> <tbody> <tr><td>C</td><td>-0.96314500</td><td>-1.26970600</td><td>-0.28430500</td></tr> <tr><td>C</td><td>0.43209000</td><td>-1.29222600</td><td>0.37038500</td></tr> <tr><td>C</td><td>1.19037300</td><td>0.00000000</td><td>0.06708800</td></tr> <tr><td>C</td><td>0.43208900</td><td>1.29222600</td><td>0.37038400</td></tr> <tr><td>C</td><td>-0.96314700</td><td>1.26970600</td><td>-0.28430400</td></tr> <tr><td>C</td><td>-1.74515900</td><td>-0.00000100</td><td>0.08440200</td></tr> <tr><td>H</td><td>0.32499700</td><td>-1.36523800</td><td>1.46208800</td></tr> <tr><td>H</td><td>1.02121900</td><td>-2.15027700</td><td>0.03631400</td></tr> <tr><td>H</td><td>-0.84742600</td><td>-1.32437900</td><td>-1.37501900</td></tr> </tbody> </table>                                                                                                                                                                                                                                                                                                                                                                                                                                                                                                                                                                                                                                                                                                                                                                                                                                                                                               |                                                                                     |                                                                                      | C           | -0.96314500 | -1.26970600 | -0.28430500 | C | 0.43209000  | -1.29222600 | 0.37038500 | C | 1.19037300  | 0.00000000  | 0.06708800  | C | 0.43208900  | 1.29222600  | 0.37038400 | C | -0.96314700 | 1.26970600  | -0.28430400 | C | -1.74515900 | -0.00000100 | 0.08440200 | H | 0.32499700  | -1.36523800 | 1.46208800 | H | 1.02121900  | -2.15027700 | 0.03631400 | H | -0.84742600 | -1.32437900 | -1.37501900 |   |            |             |             |   |            |             |            |   |            |             |             |   |            |            |            |   |            |            |            |   |            |            |            |   |            |             |            |   |            |            |             |   |            |            |             |   |            |            |             |   |            |            |             |
| C                                                                                                                                                                                                                                                                                                                                                                                                                                                                                                                                                                                                                                                                                                                                                                                                                                                                                                                                                                                                                                                                                                                                                                                                                                                                                                                                                                                                                                                                                                                                                                                                                                                                                                         | -0.96314500                                                                         | -1.26970600                                                                          | -0.28430500 |             |             |             |   |             |             |            |   |             |             |             |   |             |             |            |   |             |             |             |   |             |             |            |   |             |             |            |   |             |             |            |   |             |             |             |   |            |             |             |   |            |             |            |   |            |             |             |   |            |            |            |   |            |            |            |   |            |            |            |   |            |             |            |   |            |            |             |   |            |            |             |   |            |            |             |   |            |            |             |
| C                                                                                                                                                                                                                                                                                                                                                                                                                                                                                                                                                                                                                                                                                                                                                                                                                                                                                                                                                                                                                                                                                                                                                                                                                                                                                                                                                                                                                                                                                                                                                                                                                                                                                                         | 0.43209000                                                                          | -1.29222600                                                                          | 0.37038500  |             |             |             |   |             |             |            |   |             |             |             |   |             |             |            |   |             |             |             |   |             |             |            |   |             |             |            |   |             |             |            |   |             |             |             |   |            |             |             |   |            |             |            |   |            |             |             |   |            |            |            |   |            |            |            |   |            |            |            |   |            |             |            |   |            |            |             |   |            |            |             |   |            |            |             |   |            |            |             |
| C                                                                                                                                                                                                                                                                                                                                                                                                                                                                                                                                                                                                                                                                                                                                                                                                                                                                                                                                                                                                                                                                                                                                                                                                                                                                                                                                                                                                                                                                                                                                                                                                                                                                                                         | 1.19037300                                                                          | 0.00000000                                                                           | 0.06708800  |             |             |             |   |             |             |            |   |             |             |             |   |             |             |            |   |             |             |             |   |             |             |            |   |             |             |            |   |             |             |            |   |             |             |             |   |            |             |             |   |            |             |            |   |            |             |             |   |            |            |            |   |            |            |            |   |            |            |            |   |            |             |            |   |            |            |             |   |            |            |             |   |            |            |             |   |            |            |             |
| C                                                                                                                                                                                                                                                                                                                                                                                                                                                                                                                                                                                                                                                                                                                                                                                                                                                                                                                                                                                                                                                                                                                                                                                                                                                                                                                                                                                                                                                                                                                                                                                                                                                                                                         | 0.43208900                                                                          | 1.29222600                                                                           | 0.37038400  |             |             |             |   |             |             |            |   |             |             |             |   |             |             |            |   |             |             |             |   |             |             |            |   |             |             |            |   |             |             |            |   |             |             |             |   |            |             |             |   |            |             |            |   |            |             |             |   |            |            |            |   |            |            |            |   |            |            |            |   |            |             |            |   |            |            |             |   |            |            |             |   |            |            |             |   |            |            |             |
| C                                                                                                                                                                                                                                                                                                                                                                                                                                                                                                                                                                                                                                                                                                                                                                                                                                                                                                                                                                                                                                                                                                                                                                                                                                                                                                                                                                                                                                                                                                                                                                                                                                                                                                         | -0.96314700                                                                         | 1.26970600                                                                           | -0.28430400 |             |             |             |   |             |             |            |   |             |             |             |   |             |             |            |   |             |             |             |   |             |             |            |   |             |             |            |   |             |             |            |   |             |             |             |   |            |             |             |   |            |             |            |   |            |             |             |   |            |            |            |   |            |            |            |   |            |            |            |   |            |             |            |   |            |            |             |   |            |            |             |   |            |            |             |   |            |            |             |
| C                                                                                                                                                                                                                                                                                                                                                                                                                                                                                                                                                                                                                                                                                                                                                                                                                                                                                                                                                                                                                                                                                                                                                                                                                                                                                                                                                                                                                                                                                                                                                                                                                                                                                                         | -1.74515900                                                                         | -0.00000100                                                                          | 0.08440200  |             |             |             |   |             |             |            |   |             |             |             |   |             |             |            |   |             |             |             |   |             |             |            |   |             |             |            |   |             |             |            |   |             |             |             |   |            |             |             |   |            |             |            |   |            |             |             |   |            |            |            |   |            |            |            |   |            |            |            |   |            |             |            |   |            |            |             |   |            |            |             |   |            |            |             |   |            |            |             |
| H                                                                                                                                                                                                                                                                                                                                                                                                                                                                                                                                                                                                                                                                                                                                                                                                                                                                                                                                                                                                                                                                                                                                                                                                                                                                                                                                                                                                                                                                                                                                                                                                                                                                                                         | 0.32499700                                                                          | -1.36523800                                                                          | 1.46208800  |             |             |             |   |             |             |            |   |             |             |             |   |             |             |            |   |             |             |             |   |             |             |            |   |             |             |            |   |             |             |            |   |             |             |             |   |            |             |             |   |            |             |            |   |            |             |             |   |            |            |            |   |            |            |            |   |            |            |            |   |            |             |            |   |            |            |             |   |            |            |             |   |            |            |             |   |            |            |             |
| H                                                                                                                                                                                                                                                                                                                                                                                                                                                                                                                                                                                                                                                                                                                                                                                                                                                                                                                                                                                                                                                                                                                                                                                                                                                                                                                                                                                                                                                                                                                                                                                                                                                                                                         | 1.02121900                                                                          | -2.15027700                                                                          | 0.03631400  |             |             |             |   |             |             |            |   |             |             |             |   |             |             |            |   |             |             |             |   |             |             |            |   |             |             |            |   |             |             |            |   |             |             |             |   |            |             |             |   |            |             |            |   |            |             |             |   |            |            |            |   |            |            |            |   |            |            |            |   |            |             |            |   |            |            |             |   |            |            |             |   |            |            |             |   |            |            |             |
| H                                                                                                                                                                                                                                                                                                                                                                                                                                                                                                                                                                                                                                                                                                                                                                                                                                                                                                                                                                                                                                                                                                                                                                                                                                                                                                                                                                                                                                                                                                                                                                                                                                                                                                         | -0.84742600                                                                         | -1.32437900                                                                          | -1.37501900 |             |             |             |   |             |             |            |   |             |             |             |   |             |             |            |   |             |             |             |   |             |             |            |   |             |             |            |   |             |             |            |   |             |             |             |   |            |             |             |   |            |             |            |   |            |             |             |   |            |            |            |   |            |            |            |   |            |            |            |   |            |             |            |   |            |            |             |   |            |            |             |   |            |            |             |   |            |            |             |

| No.                   | Species                             | Optimized Structure |
|-----------------------|-------------------------------------|---------------------|
| H                     | -1.51935600 -2.16470600 0.01907300  |                     |
| H                     | 0.32499600 1.36523800 1.46208800    |                     |
| H                     | 1.02121800 2.15027700 0.03631300    |                     |
| H                     | -1.51935700 2.16470500 0.01907900   |                     |
| H                     | -0.84743000 1.32438100 -1.37501800  |                     |
| H                     | -1.95251500 -0.00000100 1.16454500  |                     |
| H                     | -2.71861000 -0.00000200 -0.42009400 |                     |
| N                     | 2.34480900 0.00000100 -0.42446700   |                     |
| 26                    |                                     |                     |
| Cartesian Coordinates |                                     |                     |
| C                     | 1.22603900 1.14795900 -0.31133100   |                     |
| C                     | -0.00593900 1.54599700 0.44553500   |                     |
| C                     | -1.44254400 -0.09736300 0.00691500  |                     |
| C                     | -0.61688000 -1.26315200 0.42581700  |                     |
| C                     | 0.74049000 -1.37327800 -0.29718800  |                     |
| C                     | 1.73459900 -0.25730300 0.05063000   |                     |
| H                     | -0.60031400 2.37474600 0.07550700   |                     |
| H                     | 1.03168100 1.20649200 -1.39073900   |                     |
| H                     | 2.03029500 1.87834600 -0.11266900   |                     |
| H                     | -0.45998000 -1.20516300 1.50964100  |                     |
| H                     | -1.21996100 -2.15766700 0.23153700  |                     |
| H                     | 1.17672100 -2.34379800 -0.03253000  |                     |
| H                     | 0.56642500 -1.39265300 -1.38051200  |                     |
| H                     | 1.96145400 -0.29419300 1.12602000   |                     |
| H                     | 2.67966600 -0.44863900 -0.47169800  |                     |
| H                     | 0.00185500 1.43495300 1.52968500    |                     |
| N                     | -2.42606200 0.39006000 -0.42950100  |                     |
| 27                    |                                     |                     |
| Cartesian Coordinates |                                     |                     |
| C                     | 1.54880100 0.68577700 -0.47532900   |                     |
| C                     | 1.07189400 1.63012400 0.57869000    |                     |
| C                     | -1.72148300 0.19808700 -0.00295500  |                     |
| C                     | -1.04172500 -0.95062600 0.60534200  |                     |



| No.                   | Species                                                                           | Optimized Structure                                                                |
|-----------------------|-----------------------------------------------------------------------------------|------------------------------------------------------------------------------------|
| C                     | 0.13315900 -1.51341000 -0.23466800                                                |                                                                                    |
| C                     | 1.49231500 -0.81105200 -0.07887600                                                |                                                                                    |
| H                     | 0.39811700 2.44791100 0.35151600                                                  |                                                                                    |
| H                     | 0.99407800 0.84500900 -1.40795500                                                 |                                                                                    |
| H                     | 2.60319100 0.91486700 -0.71104900                                                 |                                                                                    |
| H                     | -0.70062200 -0.66315000 1.60650400                                                |                                                                                    |
| H                     | -1.80165300 -1.72992500 0.73930000                                                |                                                                                    |
| H                     | 0.26125500 -2.56164600 0.06028600                                                 |                                                                                    |
| H                     | -0.16145200 -1.52421300 -1.29081100                                               |                                                                                    |
| H                     | 1.84046100 -0.91845400 0.95804700                                                 |                                                                                    |
| H                     | 2.20918000 -1.36481400 -0.69826200                                                |                                                                                    |
| N                     | -2.28973200 1.07781300 -0.50610600                                                |                                                                                    |
| H                     | 1.48780500 1.57632400 1.58194700                                                  |                                                                                    |
| 28                    | 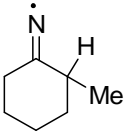 |  |
| Cartesian Coordinates |                                                                                   |                                                                                    |
| C                     | 0.42017200 1.22476400 -0.86585600                                                 |                                                                                    |
| C                     | -0.91895400 0.62591500 -0.37186700                                                |                                                                                    |
| C                     | -0.74467000 -0.88766900 -0.15354300                                               |                                                                                    |
| C                     | 0.46196700 -1.32616300 0.67701000                                                 |                                                                                    |
| C                     | 1.75486300 -0.68716000 0.13501100                                                 |                                                                                    |
| C                     | 1.62276600 0.83789500 0.01022300                                                  |                                                                                    |
| H                     | -1.67017600 0.75008000 -1.15889000                                                |                                                                                    |
| H                     | 0.60155600 0.87441500 -1.89060700                                                 |                                                                                    |
| H                     | 0.32168000 2.31641000 -0.92069900                                                 |                                                                                    |
| H                     | 0.29724100 -1.00514200 1.71436200                                                 |                                                                                    |
| H                     | 0.52131600 -2.41769200 0.67717700                                                 |                                                                                    |
| H                     | 2.59221000 -0.94902800 0.79281500                                                 |                                                                                    |
| H                     | 1.97998100 -1.11721000 -0.85017300                                                |                                                                                    |
| H                     | 1.52018600 1.28008100 1.01037400                                                  |                                                                                    |
| H                     | 2.53945300 1.25933800 -0.41904600                                                 |                                                                                    |
| N                     | -1.53765100 -1.71705000 -0.66033600                                               |                                                                                    |
| C                     | -1.45443800 1.30665700 0.90277000                                                 |                                                                                    |
| H                     | -2.41187700 0.86946400 1.20199200                                                 |                                                                                    |
| H                     | -0.76514600 1.21876000 1.74831500                                                 |                                                                                    |
| H                     | -1.61309800 2.37443800 0.71424200                                                 |                                                                                    |

| No.                                                                                                                                                                                                                                                                                                                                                                                                                                                                                                                                                                                                                                                                                                                                                                                                                                                                                                                                                                                                                                                                                                                                                                                                                                                                                                                                                                                                                                                                                                                                                                                                                                                                                                        | Species                                                                             | Optimized Structure                                                                  |             |            |             |             |   |             |            |             |   |             |             |             |   |             |             |            |   |             |             |            |   |            |             |             |   |             |            |             |   |            |             |             |   |            |             |             |   |             |             |            |   |             |             |            |   |            |             |            |   |            |             |             |   |            |            |            |   |            |             |             |   |             |             |             |   |             |            |            |   |             |            |            |   |            |            |            |   |             |            |            |
|------------------------------------------------------------------------------------------------------------------------------------------------------------------------------------------------------------------------------------------------------------------------------------------------------------------------------------------------------------------------------------------------------------------------------------------------------------------------------------------------------------------------------------------------------------------------------------------------------------------------------------------------------------------------------------------------------------------------------------------------------------------------------------------------------------------------------------------------------------------------------------------------------------------------------------------------------------------------------------------------------------------------------------------------------------------------------------------------------------------------------------------------------------------------------------------------------------------------------------------------------------------------------------------------------------------------------------------------------------------------------------------------------------------------------------------------------------------------------------------------------------------------------------------------------------------------------------------------------------------------------------------------------------------------------------------------------------|-------------------------------------------------------------------------------------|--------------------------------------------------------------------------------------|-------------|------------|-------------|-------------|---|-------------|------------|-------------|---|-------------|-------------|-------------|---|-------------|-------------|------------|---|-------------|-------------|------------|---|------------|-------------|-------------|---|-------------|------------|-------------|---|------------|-------------|-------------|---|------------|-------------|-------------|---|-------------|-------------|------------|---|-------------|-------------|------------|---|------------|-------------|------------|---|------------|-------------|-------------|---|------------|------------|------------|---|------------|-------------|-------------|---|-------------|-------------|-------------|---|-------------|------------|------------|---|-------------|------------|------------|---|------------|------------|------------|---|-------------|------------|------------|
| 29                                                                                                                                                                                                                                                                                                                                                                                                                                                                                                                                                                                                                                                                                                                                                                                                                                                                                                                                                                                                                                                                                                                                                                                                                                                                                                                                                                                                                                                                                                                                                                                                                                                                                                         | 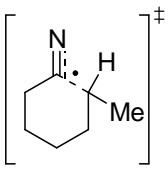   |    |             |            |             |             |   |             |            |             |   |             |             |             |   |             |             |            |   |             |             |            |   |            |             |             |   |             |            |             |   |            |             |             |   |            |             |             |   |             |             |            |   |             |             |            |   |            |             |            |   |            |             |             |   |            |            |            |   |            |             |             |   |             |             |             |   |             |            |            |   |             |            |            |   |            |            |            |   |             |            |            |
| <p>Cartesian Coordinates</p> <table border="1"> <tbody> <tr><td>C</td><td>1.03052500</td><td>0.91974000</td><td>-0.87889200</td></tr> <tr><td>C</td><td>-0.36191300</td><td>1.23719500</td><td>-0.39271300</td></tr> <tr><td>C</td><td>-1.27203900</td><td>-0.76402300</td><td>-0.11749600</td></tr> <tr><td>C</td><td>-0.23863200</td><td>-1.44388200</td><td>0.71408800</td></tr> <tr><td>C</td><td>1.17286100</td><td>-1.44908600</td><td>0.09589800</td></tr> <tr><td>C</td><td>1.82183500</td><td>-0.06227800</td><td>0.00378400</td></tr> <tr><td>H</td><td>-1.06139300</td><td>1.53290000</td><td>-1.17061700</td></tr> <tr><td>H</td><td>0.97279900</td><td>0.51706700</td><td>-1.89806500</td></tr> <tr><td>H</td><td>1.60385600</td><td>1.86152000</td><td>-0.95627200</td></tr> <tr><td>H</td><td>-0.21359900</td><td>-0.96242800</td><td>1.69906100</td></tr> <tr><td>H</td><td>-0.58865700</td><td>-2.47129500</td><td>0.86649800</td></tr> <tr><td>H</td><td>1.80094100</td><td>-2.10563000</td><td>0.70986500</td></tr> <tr><td>H</td><td>1.12415700</td><td>-1.90422500</td><td>-0.90168500</td></tr> <tr><td>H</td><td>1.94416000</td><td>0.35210100</td><td>1.01339300</td></tr> <tr><td>H</td><td>2.83361600</td><td>-0.16935000</td><td>-0.40537200</td></tr> <tr><td>N</td><td>-2.30992700</td><td>-0.77330100</td><td>-0.68601000</td></tr> <tr><td>C</td><td>-0.55688500</td><td>1.94628100</td><td>0.91878100</td></tr> <tr><td>H</td><td>-1.61266800</td><td>1.96592100</td><td>1.20618300</td></tr> <tr><td>H</td><td>0.01424300</td><td>1.49826700</td><td>1.73900000</td></tr> <tr><td>H</td><td>-0.22247700</td><td>2.99457900</td><td>0.83938700</td></tr> </tbody> </table> |                                                                                     |                                                                                      | C           | 1.03052500 | 0.91974000  | -0.87889200 | C | -0.36191300 | 1.23719500 | -0.39271300 | C | -1.27203900 | -0.76402300 | -0.11749600 | C | -0.23863200 | -1.44388200 | 0.71408800 | C | 1.17286100  | -1.44908600 | 0.09589800 | C | 1.82183500 | -0.06227800 | 0.00378400  | H | -1.06139300 | 1.53290000 | -1.17061700 | H | 0.97279900 | 0.51706700  | -1.89806500 | H | 1.60385600 | 1.86152000  | -0.95627200 | H | -0.21359900 | -0.96242800 | 1.69906100 | H | -0.58865700 | -2.47129500 | 0.86649800 | H | 1.80094100 | -2.10563000 | 0.70986500 | H | 1.12415700 | -1.90422500 | -0.90168500 | H | 1.94416000 | 0.35210100 | 1.01339300 | H | 2.83361600 | -0.16935000 | -0.40537200 | N | -2.30992700 | -0.77330100 | -0.68601000 | C | -0.55688500 | 1.94628100 | 0.91878100 | H | -1.61266800 | 1.96592100 | 1.20618300 | H | 0.01424300 | 1.49826700 | 1.73900000 | H | -0.22247700 | 2.99457900 | 0.83938700 |
| C                                                                                                                                                                                                                                                                                                                                                                                                                                                                                                                                                                                                                                                                                                                                                                                                                                                                                                                                                                                                                                                                                                                                                                                                                                                                                                                                                                                                                                                                                                                                                                                                                                                                                                          | 1.03052500                                                                          | 0.91974000                                                                           | -0.87889200 |            |             |             |   |             |            |             |   |             |             |             |   |             |             |            |   |             |             |            |   |            |             |             |   |             |            |             |   |            |             |             |   |            |             |             |   |             |             |            |   |             |             |            |   |            |             |            |   |            |             |             |   |            |            |            |   |            |             |             |   |             |             |             |   |             |            |            |   |             |            |            |   |            |            |            |   |             |            |            |
| C                                                                                                                                                                                                                                                                                                                                                                                                                                                                                                                                                                                                                                                                                                                                                                                                                                                                                                                                                                                                                                                                                                                                                                                                                                                                                                                                                                                                                                                                                                                                                                                                                                                                                                          | -0.36191300                                                                         | 1.23719500                                                                           | -0.39271300 |            |             |             |   |             |            |             |   |             |             |             |   |             |             |            |   |             |             |            |   |            |             |             |   |             |            |             |   |            |             |             |   |            |             |             |   |             |             |            |   |             |             |            |   |            |             |            |   |            |             |             |   |            |            |            |   |            |             |             |   |             |             |             |   |             |            |            |   |             |            |            |   |            |            |            |   |             |            |            |
| C                                                                                                                                                                                                                                                                                                                                                                                                                                                                                                                                                                                                                                                                                                                                                                                                                                                                                                                                                                                                                                                                                                                                                                                                                                                                                                                                                                                                                                                                                                                                                                                                                                                                                                          | -1.27203900                                                                         | -0.76402300                                                                          | -0.11749600 |            |             |             |   |             |            |             |   |             |             |             |   |             |             |            |   |             |             |            |   |            |             |             |   |             |            |             |   |            |             |             |   |            |             |             |   |             |             |            |   |             |             |            |   |            |             |            |   |            |             |             |   |            |            |            |   |            |             |             |   |             |             |             |   |             |            |            |   |             |            |            |   |            |            |            |   |             |            |            |
| C                                                                                                                                                                                                                                                                                                                                                                                                                                                                                                                                                                                                                                                                                                                                                                                                                                                                                                                                                                                                                                                                                                                                                                                                                                                                                                                                                                                                                                                                                                                                                                                                                                                                                                          | -0.23863200                                                                         | -1.44388200                                                                          | 0.71408800  |            |             |             |   |             |            |             |   |             |             |             |   |             |             |            |   |             |             |            |   |            |             |             |   |             |            |             |   |            |             |             |   |            |             |             |   |             |             |            |   |             |             |            |   |            |             |            |   |            |             |             |   |            |            |            |   |            |             |             |   |             |             |             |   |             |            |            |   |             |            |            |   |            |            |            |   |             |            |            |
| C                                                                                                                                                                                                                                                                                                                                                                                                                                                                                                                                                                                                                                                                                                                                                                                                                                                                                                                                                                                                                                                                                                                                                                                                                                                                                                                                                                                                                                                                                                                                                                                                                                                                                                          | 1.17286100                                                                          | -1.44908600                                                                          | 0.09589800  |            |             |             |   |             |            |             |   |             |             |             |   |             |             |            |   |             |             |            |   |            |             |             |   |             |            |             |   |            |             |             |   |            |             |             |   |             |             |            |   |             |             |            |   |            |             |            |   |            |             |             |   |            |            |            |   |            |             |             |   |             |             |             |   |             |            |            |   |             |            |            |   |            |            |            |   |             |            |            |
| C                                                                                                                                                                                                                                                                                                                                                                                                                                                                                                                                                                                                                                                                                                                                                                                                                                                                                                                                                                                                                                                                                                                                                                                                                                                                                                                                                                                                                                                                                                                                                                                                                                                                                                          | 1.82183500                                                                          | -0.06227800                                                                          | 0.00378400  |            |             |             |   |             |            |             |   |             |             |             |   |             |             |            |   |             |             |            |   |            |             |             |   |             |            |             |   |            |             |             |   |            |             |             |   |             |             |            |   |             |             |            |   |            |             |            |   |            |             |             |   |            |            |            |   |            |             |             |   |             |             |             |   |             |            |            |   |             |            |            |   |            |            |            |   |             |            |            |
| H                                                                                                                                                                                                                                                                                                                                                                                                                                                                                                                                                                                                                                                                                                                                                                                                                                                                                                                                                                                                                                                                                                                                                                                                                                                                                                                                                                                                                                                                                                                                                                                                                                                                                                          | -1.06139300                                                                         | 1.53290000                                                                           | -1.17061700 |            |             |             |   |             |            |             |   |             |             |             |   |             |             |            |   |             |             |            |   |            |             |             |   |             |            |             |   |            |             |             |   |            |             |             |   |             |             |            |   |             |             |            |   |            |             |            |   |            |             |             |   |            |            |            |   |            |             |             |   |             |             |             |   |             |            |            |   |             |            |            |   |            |            |            |   |             |            |            |
| H                                                                                                                                                                                                                                                                                                                                                                                                                                                                                                                                                                                                                                                                                                                                                                                                                                                                                                                                                                                                                                                                                                                                                                                                                                                                                                                                                                                                                                                                                                                                                                                                                                                                                                          | 0.97279900                                                                          | 0.51706700                                                                           | -1.89806500 |            |             |             |   |             |            |             |   |             |             |             |   |             |             |            |   |             |             |            |   |            |             |             |   |             |            |             |   |            |             |             |   |            |             |             |   |             |             |            |   |             |             |            |   |            |             |            |   |            |             |             |   |            |            |            |   |            |             |             |   |             |             |             |   |             |            |            |   |             |            |            |   |            |            |            |   |             |            |            |
| H                                                                                                                                                                                                                                                                                                                                                                                                                                                                                                                                                                                                                                                                                                                                                                                                                                                                                                                                                                                                                                                                                                                                                                                                                                                                                                                                                                                                                                                                                                                                                                                                                                                                                                          | 1.60385600                                                                          | 1.86152000                                                                           | -0.95627200 |            |             |             |   |             |            |             |   |             |             |             |   |             |             |            |   |             |             |            |   |            |             |             |   |             |            |             |   |            |             |             |   |            |             |             |   |             |             |            |   |             |             |            |   |            |             |            |   |            |             |             |   |            |            |            |   |            |             |             |   |             |             |             |   |             |            |            |   |             |            |            |   |            |            |            |   |             |            |            |
| H                                                                                                                                                                                                                                                                                                                                                                                                                                                                                                                                                                                                                                                                                                                                                                                                                                                                                                                                                                                                                                                                                                                                                                                                                                                                                                                                                                                                                                                                                                                                                                                                                                                                                                          | -0.21359900                                                                         | -0.96242800                                                                          | 1.69906100  |            |             |             |   |             |            |             |   |             |             |             |   |             |             |            |   |             |             |            |   |            |             |             |   |             |            |             |   |            |             |             |   |            |             |             |   |             |             |            |   |             |             |            |   |            |             |            |   |            |             |             |   |            |            |            |   |            |             |             |   |             |             |             |   |             |            |            |   |             |            |            |   |            |            |            |   |             |            |            |
| H                                                                                                                                                                                                                                                                                                                                                                                                                                                                                                                                                                                                                                                                                                                                                                                                                                                                                                                                                                                                                                                                                                                                                                                                                                                                                                                                                                                                                                                                                                                                                                                                                                                                                                          | -0.58865700                                                                         | -2.47129500                                                                          | 0.86649800  |            |             |             |   |             |            |             |   |             |             |             |   |             |             |            |   |             |             |            |   |            |             |             |   |             |            |             |   |            |             |             |   |            |             |             |   |             |             |            |   |             |             |            |   |            |             |            |   |            |             |             |   |            |            |            |   |            |             |             |   |             |             |             |   |             |            |            |   |             |            |            |   |            |            |            |   |             |            |            |
| H                                                                                                                                                                                                                                                                                                                                                                                                                                                                                                                                                                                                                                                                                                                                                                                                                                                                                                                                                                                                                                                                                                                                                                                                                                                                                                                                                                                                                                                                                                                                                                                                                                                                                                          | 1.80094100                                                                          | -2.10563000                                                                          | 0.70986500  |            |             |             |   |             |            |             |   |             |             |             |   |             |             |            |   |             |             |            |   |            |             |             |   |             |            |             |   |            |             |             |   |            |             |             |   |             |             |            |   |             |             |            |   |            |             |            |   |            |             |             |   |            |            |            |   |            |             |             |   |             |             |             |   |             |            |            |   |             |            |            |   |            |            |            |   |             |            |            |
| H                                                                                                                                                                                                                                                                                                                                                                                                                                                                                                                                                                                                                                                                                                                                                                                                                                                                                                                                                                                                                                                                                                                                                                                                                                                                                                                                                                                                                                                                                                                                                                                                                                                                                                          | 1.12415700                                                                          | -1.90422500                                                                          | -0.90168500 |            |             |             |   |             |            |             |   |             |             |             |   |             |             |            |   |             |             |            |   |            |             |             |   |             |            |             |   |            |             |             |   |            |             |             |   |             |             |            |   |             |             |            |   |            |             |            |   |            |             |             |   |            |            |            |   |            |             |             |   |             |             |             |   |             |            |            |   |             |            |            |   |            |            |            |   |             |            |            |
| H                                                                                                                                                                                                                                                                                                                                                                                                                                                                                                                                                                                                                                                                                                                                                                                                                                                                                                                                                                                                                                                                                                                                                                                                                                                                                                                                                                                                                                                                                                                                                                                                                                                                                                          | 1.94416000                                                                          | 0.35210100                                                                           | 1.01339300  |            |             |             |   |             |            |             |   |             |             |             |   |             |             |            |   |             |             |            |   |            |             |             |   |             |            |             |   |            |             |             |   |            |             |             |   |             |             |            |   |             |             |            |   |            |             |            |   |            |             |             |   |            |            |            |   |            |             |             |   |             |             |             |   |             |            |            |   |             |            |            |   |            |            |            |   |             |            |            |
| H                                                                                                                                                                                                                                                                                                                                                                                                                                                                                                                                                                                                                                                                                                                                                                                                                                                                                                                                                                                                                                                                                                                                                                                                                                                                                                                                                                                                                                                                                                                                                                                                                                                                                                          | 2.83361600                                                                          | -0.16935000                                                                          | -0.40537200 |            |             |             |   |             |            |             |   |             |             |             |   |             |             |            |   |             |             |            |   |            |             |             |   |             |            |             |   |            |             |             |   |            |             |             |   |             |             |            |   |             |             |            |   |            |             |            |   |            |             |             |   |            |            |            |   |            |             |             |   |             |             |             |   |             |            |            |   |             |            |            |   |            |            |            |   |             |            |            |
| N                                                                                                                                                                                                                                                                                                                                                                                                                                                                                                                                                                                                                                                                                                                                                                                                                                                                                                                                                                                                                                                                                                                                                                                                                                                                                                                                                                                                                                                                                                                                                                                                                                                                                                          | -2.30992700                                                                         | -0.77330100                                                                          | -0.68601000 |            |             |             |   |             |            |             |   |             |             |             |   |             |             |            |   |             |             |            |   |            |             |             |   |             |            |             |   |            |             |             |   |            |             |             |   |             |             |            |   |             |             |            |   |            |             |            |   |            |             |             |   |            |            |            |   |            |             |             |   |             |             |             |   |             |            |            |   |             |            |            |   |            |            |            |   |             |            |            |
| C                                                                                                                                                                                                                                                                                                                                                                                                                                                                                                                                                                                                                                                                                                                                                                                                                                                                                                                                                                                                                                                                                                                                                                                                                                                                                                                                                                                                                                                                                                                                                                                                                                                                                                          | -0.55688500                                                                         | 1.94628100                                                                           | 0.91878100  |            |             |             |   |             |            |             |   |             |             |             |   |             |             |            |   |             |             |            |   |            |             |             |   |             |            |             |   |            |             |             |   |            |             |             |   |             |             |            |   |             |             |            |   |            |             |            |   |            |             |             |   |            |            |            |   |            |             |             |   |             |             |             |   |             |            |            |   |             |            |            |   |            |            |            |   |             |            |            |
| H                                                                                                                                                                                                                                                                                                                                                                                                                                                                                                                                                                                                                                                                                                                                                                                                                                                                                                                                                                                                                                                                                                                                                                                                                                                                                                                                                                                                                                                                                                                                                                                                                                                                                                          | -1.61266800                                                                         | 1.96592100                                                                           | 1.20618300  |            |             |             |   |             |            |             |   |             |             |             |   |             |             |            |   |             |             |            |   |            |             |             |   |             |            |             |   |            |             |             |   |            |             |             |   |             |             |            |   |             |             |            |   |            |             |            |   |            |             |             |   |            |            |            |   |            |             |             |   |             |             |             |   |             |            |            |   |             |            |            |   |            |            |            |   |             |            |            |
| H                                                                                                                                                                                                                                                                                                                                                                                                                                                                                                                                                                                                                                                                                                                                                                                                                                                                                                                                                                                                                                                                                                                                                                                                                                                                                                                                                                                                                                                                                                                                                                                                                                                                                                          | 0.01424300                                                                          | 1.49826700                                                                           | 1.73900000  |            |             |             |   |             |            |             |   |             |             |             |   |             |             |            |   |             |             |            |   |            |             |             |   |             |            |             |   |            |             |             |   |            |             |             |   |             |             |            |   |             |             |            |   |            |             |            |   |            |             |             |   |            |            |            |   |            |             |             |   |             |             |             |   |             |            |            |   |             |            |            |   |            |            |            |   |             |            |            |
| H                                                                                                                                                                                                                                                                                                                                                                                                                                                                                                                                                                                                                                                                                                                                                                                                                                                                                                                                                                                                                                                                                                                                                                                                                                                                                                                                                                                                                                                                                                                                                                                                                                                                                                          | -0.22247700                                                                         | 2.99457900                                                                           | 0.83938700  |            |             |             |   |             |            |             |   |             |             |             |   |             |             |            |   |             |             |            |   |            |             |             |   |             |            |             |   |            |             |             |   |            |             |             |   |             |             |            |   |             |             |            |   |            |             |            |   |            |             |             |   |            |            |            |   |            |             |             |   |             |             |             |   |             |            |            |   |             |            |            |   |            |            |            |   |             |            |            |
| 30                                                                                                                                                                                                                                                                                                                                                                                                                                                                                                                                                                                                                                                                                                                                                                                                                                                                                                                                                                                                                                                                                                                                                                                                                                                                                                                                                                                                                                                                                                                                                                                                                                                                                                         |  |  |             |            |             |             |   |             |            |             |   |             |             |             |   |             |             |            |   |             |             |            |   |            |             |             |   |             |            |             |   |            |             |             |   |            |             |             |   |             |             |            |   |             |             |            |   |            |             |            |   |            |             |             |   |            |            |            |   |            |             |             |   |             |             |             |   |             |            |            |   |             |            |            |   |            |            |            |   |             |            |            |
| <p>Cartesian Coordinates</p> <table border="1"> <tbody> <tr><td>C</td><td>1.09136000</td><td>-0.44895100</td><td>-0.98233900</td></tr> <tr><td>C</td><td>1.43036800</td><td>0.78954900</td><td>-0.20743000</td></tr> <tr><td>C</td><td>-1.80305300</td><td>0.92971800</td><td>0.06938000</td></tr> <tr><td>C</td><td>-1.59137600</td><td>-0.27781100</td><td>0.87404800</td></tr> <tr><td>C</td><td>-1.08136400</td><td>-1.50071400</td><td>0.06856200</td></tr> <tr><td>C</td><td>0.43631100</td><td>-1.59349600</td><td>-0.15882000</td></tr> <tr><td>H</td><td>0.90522000</td><td>1.71380100</td><td>-0.42684200</td></tr> <tr><td>H</td><td>0.43973100</td><td>-0.19992800</td><td>-1.82883800</td></tr> <tr><td>H</td><td>2.01801700</td><td>-0.86044000</td><td>-1.41647100</td></tr> </tbody> </table>                                                                                                                                                                                                                                                                                                                                                                                                                                                                                                                                                                                                                                                                                                                                                                                                                                                                                              |                                                                                     |                                                                                      | C           | 1.09136000 | -0.44895100 | -0.98233900 | C | 1.43036800  | 0.78954900 | -0.20743000 | C | -1.80305300 | 0.92971800  | 0.06938000  | C | -1.59137600 | -0.27781100 | 0.87404800 | C | -1.08136400 | -1.50071400 | 0.06856200 | C | 0.43631100 | -1.59349600 | -0.15882000 | H | 0.90522000  | 1.71380100 | -0.42684200 | H | 0.43973100 | -0.19992800 | -1.82883800 | H | 2.01801700 | -0.86044000 | -1.41647100 |   |             |             |            |   |             |             |            |   |            |             |            |   |            |             |             |   |            |            |            |   |            |             |             |   |             |             |             |   |             |            |            |   |             |            |            |   |            |            |            |   |             |            |            |
| C                                                                                                                                                                                                                                                                                                                                                                                                                                                                                                                                                                                                                                                                                                                                                                                                                                                                                                                                                                                                                                                                                                                                                                                                                                                                                                                                                                                                                                                                                                                                                                                                                                                                                                          | 1.09136000                                                                          | -0.44895100                                                                          | -0.98233900 |            |             |             |   |             |            |             |   |             |             |             |   |             |             |            |   |             |             |            |   |            |             |             |   |             |            |             |   |            |             |             |   |            |             |             |   |             |             |            |   |             |             |            |   |            |             |            |   |            |             |             |   |            |            |            |   |            |             |             |   |             |             |             |   |             |            |            |   |             |            |            |   |            |            |            |   |             |            |            |
| C                                                                                                                                                                                                                                                                                                                                                                                                                                                                                                                                                                                                                                                                                                                                                                                                                                                                                                                                                                                                                                                                                                                                                                                                                                                                                                                                                                                                                                                                                                                                                                                                                                                                                                          | 1.43036800                                                                          | 0.78954900                                                                           | -0.20743000 |            |             |             |   |             |            |             |   |             |             |             |   |             |             |            |   |             |             |            |   |            |             |             |   |             |            |             |   |            |             |             |   |            |             |             |   |             |             |            |   |             |             |            |   |            |             |            |   |            |             |             |   |            |            |            |   |            |             |             |   |             |             |             |   |             |            |            |   |             |            |            |   |            |            |            |   |             |            |            |
| C                                                                                                                                                                                                                                                                                                                                                                                                                                                                                                                                                                                                                                                                                                                                                                                                                                                                                                                                                                                                                                                                                                                                                                                                                                                                                                                                                                                                                                                                                                                                                                                                                                                                                                          | -1.80305300                                                                         | 0.92971800                                                                           | 0.06938000  |            |             |             |   |             |            |             |   |             |             |             |   |             |             |            |   |             |             |            |   |            |             |             |   |             |            |             |   |            |             |             |   |            |             |             |   |             |             |            |   |             |             |            |   |            |             |            |   |            |             |             |   |            |            |            |   |            |             |             |   |             |             |             |   |             |            |            |   |             |            |            |   |            |            |            |   |             |            |            |
| C                                                                                                                                                                                                                                                                                                                                                                                                                                                                                                                                                                                                                                                                                                                                                                                                                                                                                                                                                                                                                                                                                                                                                                                                                                                                                                                                                                                                                                                                                                                                                                                                                                                                                                          | -1.59137600                                                                         | -0.27781100                                                                          | 0.87404800  |            |             |             |   |             |            |             |   |             |             |             |   |             |             |            |   |             |             |            |   |            |             |             |   |             |            |             |   |            |             |             |   |            |             |             |   |             |             |            |   |             |             |            |   |            |             |            |   |            |             |             |   |            |            |            |   |            |             |             |   |             |             |             |   |             |            |            |   |             |            |            |   |            |            |            |   |             |            |            |
| C                                                                                                                                                                                                                                                                                                                                                                                                                                                                                                                                                                                                                                                                                                                                                                                                                                                                                                                                                                                                                                                                                                                                                                                                                                                                                                                                                                                                                                                                                                                                                                                                                                                                                                          | -1.08136400                                                                         | -1.50071400                                                                          | 0.06856200  |            |             |             |   |             |            |             |   |             |             |             |   |             |             |            |   |             |             |            |   |            |             |             |   |             |            |             |   |            |             |             |   |            |             |             |   |             |             |            |   |             |             |            |   |            |             |            |   |            |             |             |   |            |            |            |   |            |             |             |   |             |             |             |   |             |            |            |   |             |            |            |   |            |            |            |   |             |            |            |
| C                                                                                                                                                                                                                                                                                                                                                                                                                                                                                                                                                                                                                                                                                                                                                                                                                                                                                                                                                                                                                                                                                                                                                                                                                                                                                                                                                                                                                                                                                                                                                                                                                                                                                                          | 0.43631100                                                                          | -1.59349600                                                                          | -0.15882000 |            |             |             |   |             |            |             |   |             |             |             |   |             |             |            |   |             |             |            |   |            |             |             |   |             |            |             |   |            |             |             |   |            |             |             |   |             |             |            |   |             |             |            |   |            |             |            |   |            |             |             |   |            |            |            |   |            |             |             |   |             |             |             |   |             |            |            |   |             |            |            |   |            |            |            |   |             |            |            |
| H                                                                                                                                                                                                                                                                                                                                                                                                                                                                                                                                                                                                                                                                                                                                                                                                                                                                                                                                                                                                                                                                                                                                                                                                                                                                                                                                                                                                                                                                                                                                                                                                                                                                                                          | 0.90522000                                                                          | 1.71380100                                                                           | -0.42684200 |            |             |             |   |             |            |             |   |             |             |             |   |             |             |            |   |             |             |            |   |            |             |             |   |             |            |             |   |            |             |             |   |            |             |             |   |             |             |            |   |             |             |            |   |            |             |            |   |            |             |             |   |            |            |            |   |            |             |             |   |             |             |             |   |             |            |            |   |             |            |            |   |            |            |            |   |             |            |            |
| H                                                                                                                                                                                                                                                                                                                                                                                                                                                                                                                                                                                                                                                                                                                                                                                                                                                                                                                                                                                                                                                                                                                                                                                                                                                                                                                                                                                                                                                                                                                                                                                                                                                                                                          | 0.43973100                                                                          | -0.19992800                                                                          | -1.82883800 |            |             |             |   |             |            |             |   |             |             |             |   |             |             |            |   |             |             |            |   |            |             |             |   |             |            |             |   |            |             |             |   |            |             |             |   |             |             |            |   |             |             |            |   |            |             |            |   |            |             |             |   |            |            |            |   |            |             |             |   |             |             |             |   |             |            |            |   |             |            |            |   |            |            |            |   |             |            |            |
| H                                                                                                                                                                                                                                                                                                                                                                                                                                                                                                                                                                                                                                                                                                                                                                                                                                                                                                                                                                                                                                                                                                                                                                                                                                                                                                                                                                                                                                                                                                                                                                                                                                                                                                          | 2.01801700                                                                          | -0.86044000                                                                          | -1.41647100 |            |             |             |   |             |            |             |   |             |             |             |   |             |             |            |   |             |             |            |   |            |             |             |   |             |            |             |   |            |             |             |   |            |             |             |   |             |             |            |   |             |             |            |   |            |             |            |   |            |             |             |   |            |            |            |   |            |             |             |   |             |             |             |   |             |            |            |   |             |            |            |   |            |            |            |   |             |            |            |

| No.                   | Species                                                                           | Optimized Structure                                                                |  |  |
|-----------------------|-----------------------------------------------------------------------------------|------------------------------------------------------------------------------------|--|--|
| H                     | -0.89916800 -0.03511800 1.68866900                                                |                                                                                    |  |  |
| H                     | -2.55605600 -0.51949600 1.33628500                                                |                                                                                    |  |  |
| H                     | -1.39265300 -2.39547600 0.62067800                                                |                                                                                    |  |  |
| H                     | -1.60580000 -1.53462900 -0.89380900                                               |                                                                                    |  |  |
| H                     | 0.94326600 -1.67598300 0.81209000                                                 |                                                                                    |  |  |
| H                     | 0.62131000 -2.54295900 -0.67761200                                                |                                                                                    |  |  |
| N                     | -2.00893400 1.87466500 -0.57463400                                                |                                                                                    |  |  |
| C                     | 2.63133300 0.83429500 0.68063000                                                  |                                                                                    |  |  |
| H                     | 2.60215300 1.68681800 1.36700200                                                  |                                                                                    |  |  |
| H                     | 2.74015300 -0.07999000 1.28073300                                                 |                                                                                    |  |  |
| H                     | 3.56489300 0.92520400 0.09636900                                                  |                                                                                    |  |  |
| 31                    | 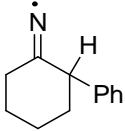 |  |  |  |
| Cartesian Coordinates |                                                                                   |                                                                                    |  |  |
| C                     | 3.42748500 -0.09703300 -0.38197100                                                |                                                                                    |  |  |
| C                     | 2.82129800 0.84712900 0.67180300                                                  |                                                                                    |  |  |
| C                     | 1.31555400 1.01497500 0.45090300                                                  |                                                                                    |  |  |
| C                     | 0.52157100 -0.30450200 0.38414900                                                 |                                                                                    |  |  |
| C                     | 1.17481300 -1.22999800 -0.67799300                                                |                                                                                    |  |  |
| C                     | 2.67653600 -1.43444900 -0.43445500                                                |                                                                                    |  |  |
| H                     | 2.96574000 0.42362200 1.67583400                                                  |                                                                                    |  |  |
| H                     | 3.29976500 1.82980500 0.65513700                                                  |                                                                                    |  |  |
| H                     | 3.38318300 0.38864900 -1.36582100                                                 |                                                                                    |  |  |
| H                     | 4.48843100 -0.25880700 -0.15696900                                                |                                                                                    |  |  |
| H                     | 0.67692700 -0.77940600 1.36431700                                                 |                                                                                    |  |  |
| H                     | 0.64848500 -2.19135700 -0.66852700                                                |                                                                                    |  |  |
| H                     | 1.01534500 -0.79477900 -1.67303700                                                |                                                                                    |  |  |
| H                     | 2.82221500 -1.97217700 0.51370700                                                 |                                                                                    |  |  |
| H                     | 3.09568000 -2.07222400 -1.22168000                                                |                                                                                    |  |  |
| N                     | 0.80691700 2.15405500 0.32227300                                                  |                                                                                    |  |  |
| C                     | -0.97361300 -0.14949000 0.17461800                                                |                                                                                    |  |  |
| C                     | -1.86764500 -0.74413700 1.07482100                                                |                                                                                    |  |  |
| C                     | -1.49761400 0.53380300 -0.93352300                                                |                                                                                    |  |  |
| C                     | -3.24958700 -0.66201600 0.87944400                                                |                                                                                    |  |  |
| H                     | -1.48033700 -1.27514000 1.94151800                                                |                                                                                    |  |  |
| C                     | -2.87662100 0.61943100 -1.13156600                                                |                                                                                    |  |  |
| H                     | -0.82631500 1.01654200 -1.63702700                                                |                                                                                    |  |  |
| C                     | -3.75870700 0.02066800 -0.22666600                                                |                                                                                    |  |  |
| H                     | -3.92383200 -1.12821900 1.59238700                                                |                                                                                    |  |  |

| No.                   | Species                                                                             | Optimized Structure                                                                  |
|-----------------------|-------------------------------------------------------------------------------------|--------------------------------------------------------------------------------------|
| H                     | -3.26296400 1.15928600 -1.99146400                                                  |                                                                                      |
| H                     | -4.83156000 0.08953000 -0.38167100                                                  |                                                                                      |
| 32                    | 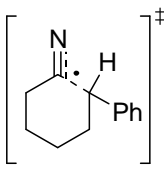   |    |
| Cartesian Coordinates |                                                                                     |                                                                                      |
| C                     | 1.44922300 -0.92908700 1.35699100                                                   |                                                                                      |
| C                     | 0.47989500 0.20824200 1.08695200                                                    |                                                                                      |
| C                     | 1.50349200 1.42595400 -0.27450000                                                   |                                                                                      |
| C                     | 1.97606500 0.48245000 -1.33298900                                                   |                                                                                      |
| C                     | 2.86599700 -0.64083100 -0.77216100                                                  |                                                                                      |
| C                     | 2.10078100 -1.60989300 0.13506000                                                   |                                                                                      |
| H                     | 2.25017400 -0.53777300 1.99568700                                                   |                                                                                      |
| H                     | 0.93379400 -1.69762800 1.95534700                                                   |                                                                                      |
| H                     | 1.09838900 0.05397000 -1.83196800                                                   |                                                                                      |
| H                     | 2.52212600 1.07800500 -2.07223600                                                   |                                                                                      |
| H                     | 3.29405000 -1.19322400 -1.61709000                                                  |                                                                                      |
| H                     | 3.70794000 -0.19456700 -0.22751800                                                  |                                                                                      |
| H                     | 1.34737600 -2.13158000 -0.46565200                                                  |                                                                                      |
| H                     | 2.78849400 -2.38185700 0.50117700                                                   |                                                                                      |
| N                     | 1.49802800 2.55586300 0.10359800                                                    |                                                                                      |
| C                     | -0.85239900 0.00802600 0.50945600                                                   |                                                                                      |
| C                     | -1.30916600 -1.22693800 -0.00318800                                                 |                                                                                      |
| C                     | -1.75020700 1.10263200 0.47392000                                                   |                                                                                      |
| C                     | -2.59684300 -1.35802400 -0.52538800                                                 |                                                                                      |
| H                     | -0.66844100 -2.10071200 0.03171900                                                  |                                                                                      |
| C                     | -3.02995000 0.97128800 -0.05425600                                                  |                                                                                      |
| H                     | -1.41657700 2.06438700 0.85339300                                                   |                                                                                      |
| C                     | -3.46273900 -0.26174000 -0.55979800                                                 |                                                                                      |
| H                     | -2.92607300 -2.32291100 -0.90109200                                                 |                                                                                      |
| H                     | -3.69511000 1.83000200 -0.07172200                                                  |                                                                                      |
| H                     | -4.46309600 -0.36588900 -0.96943100                                                 |                                                                                      |
| H                     | 0.49586800 0.97627400 1.85360200                                                    |                                                                                      |
| 33                    |  |  |
| Cartesian Coordinates |                                                                                     |                                                                                      |

| No.                   | Species                                                                             | Optimized Structure                                                                  |
|-----------------------|-------------------------------------------------------------------------------------|--------------------------------------------------------------------------------------|
| C                     | 0.95442700 1.08303800 -1.20525800                                                   |                                                                                      |
| C                     | 0.12628500 -0.13620300 -0.92087200                                                  |                                                                                      |
| C                     | 2.93739000 -1.35045000 0.22307500                                                   |                                                                                      |
| C                     | 2.78128700 -0.26737400 1.19872500                                                   |                                                                                      |
| C                     | 2.88863700 1.15718200 0.59373900                                                    |                                                                                      |
| C                     | 1.59495800 1.77146600 0.03460800                                                    |                                                                                      |
| H                     | 0.57176600 -1.10831100 -1.11090600                                                  |                                                                                      |
| H                     | 1.74810700 0.82363400 -1.91630200                                                   |                                                                                      |
| H                     | 0.33173900 1.83710300 -1.70622600                                                   |                                                                                      |
| H                     | 1.82243600 -0.39878700 1.71385200                                                   |                                                                                      |
| H                     | 3.56706600 -0.40766600 1.95052000                                                   |                                                                                      |
| H                     | 3.24459500 1.81399400 1.39610200                                                    |                                                                                      |
| H                     | 3.66994500 1.16040400 -0.17547500                                                   |                                                                                      |
| H                     | 0.84896700 1.83349100 0.83709100                                                    |                                                                                      |
| H                     | 1.83384300 2.80632000 -0.24303800                                                   |                                                                                      |
| N                     | 3.09257300 -2.20627900 -0.54738500                                                  |                                                                                      |
| C                     | -1.20433200 -0.12230700 -0.42861700                                                 |                                                                                      |
| C                     | -1.92938300 1.07743900 -0.15893300                                                  |                                                                                      |
| C                     | -1.88260400 -1.35586500 -0.18578900                                                 |                                                                                      |
| C                     | -3.23328800 1.03673400 0.32017700                                                   |                                                                                      |
| H                     | -1.46010600 2.03999500 -0.33576900                                                  |                                                                                      |
| C                     | -3.18402800 -1.38488800 0.29352100                                                  |                                                                                      |
| H                     | -1.35726000 -2.28598800 -0.38694600                                                 |                                                                                      |
| C                     | -3.87318800 -0.18932100 0.55260900                                                  |                                                                                      |
| H                     | -3.76153400 1.96642100 0.51409100                                                   |                                                                                      |
| H                     | -3.67221400 -2.34001400 0.46654900                                                  |                                                                                      |
| H                     | -4.89233200 -0.21335100 0.92625200                                                  |                                                                                      |
| 34                    | 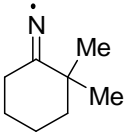 |  |
| Cartesian Coordinates |                                                                                     |                                                                                      |
| C                     | -0.10789900 -1.30189200 -0.66649700                                                 |                                                                                      |
| C                     | 0.85126000 -0.29532200 0.02733300                                                   |                                                                                      |
| C                     | 0.17357500 1.09881500 0.00819900                                                    |                                                                                      |
| C                     | -1.28137500 1.17225000 0.48240000                                                   |                                                                                      |
| C                     | -2.15169800 0.13855200 -0.25379000                                                  |                                                                                      |
| C                     | -1.55468300 -1.27099300 -0.15043000                                                 |                                                                                      |
| H                     | -0.11339000 -1.08217000 -1.74301800                                                 |                                                                                      |
| H                     | 0.31456300 -2.30944500 -0.55691300                                                  |                                                                                      |
| H                     | -1.30263700 0.97476500 1.56231400                                                   |                                                                                      |

| No.                   | Species                                                                           | Optimized Structure                                                                |  |  |
|-----------------------|-----------------------------------------------------------------------------------|------------------------------------------------------------------------------------|--|--|
| H                     | -1.65166100 2.18948500 0.33027000                                                 |                                                                                    |  |  |
| H                     | -3.16804900 0.15951700 0.15757400                                                 |                                                                                    |  |  |
| H                     | -2.23178400 0.42615700 -1.31076400                                                |                                                                                    |  |  |
| H                     | -1.59452800 -1.61275500 0.89242900                                                |                                                                                    |  |  |
| H                     | -2.16097600 -1.97906000 -0.72791800                                               |                                                                                    |  |  |
| N                     | 0.76299600 2.13023000 -0.39428900                                                 |                                                                                    |  |  |
| C                     | 1.11331000 -0.69778900 1.49720100                                                 |                                                                                    |  |  |
| H                     | 1.78207500 0.02206800 1.97998100                                                  |                                                                                    |  |  |
| H                     | 0.19825800 -0.75933500 2.09225700                                                 |                                                                                    |  |  |
| H                     | 1.59623800 -1.68150800 1.52683200                                                 |                                                                                    |  |  |
| C                     | 2.19096600 -0.25939300 -0.72673800                                                |                                                                                    |  |  |
| H                     | 2.89226700 0.43672000 -0.25745800                                                 |                                                                                    |  |  |
| H                     | 2.64411500 -1.25739700 -0.72623500                                                |                                                                                    |  |  |
| H                     | 2.05379400 0.05597700 -1.76539000                                                 |                                                                                    |  |  |
| 35                    | 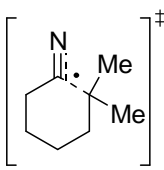 |  |  |  |
| Cartesian Coordinates |                                                                                   |                                                                                    |  |  |
| C                     | 0.04036300 -1.36785900 -0.69119400                                                |                                                                                    |  |  |
| C                     | 0.99055300 -0.43753400 0.03601000                                                 |                                                                                    |  |  |
| C                     | -0.12355400 1.46180500 0.00411100                                                 |                                                                                    |  |  |
| C                     | -1.47066800 1.06274800 0.51211500                                                 |                                                                                    |  |  |
| C                     | -2.13399500 -0.07696600 -0.28149600                                               |                                                                                    |  |  |
| C                     | -1.40293500 -1.41964900 -0.16546100                                               |                                                                                    |  |  |
| H                     | 0.02224700 -1.09415900 -1.75447700                                                |                                                                                    |  |  |
| H                     | 0.46786100 -2.38722400 -0.65263500                                                |                                                                                    |  |  |
| H                     | -1.37518200 0.77784500 1.56632100                                                 |                                                                                    |  |  |
| H                     | -2.09495800 1.96264800 0.47751900                                                 |                                                                                    |  |  |
| H                     | -3.16231400 -0.18571600 0.08386900                                                |                                                                                    |  |  |
| H                     | -2.20517500 0.21730300 -1.33661000                                                |                                                                                    |  |  |
| H                     | -1.41525900 -1.75563400 0.87977000                                                |                                                                                    |  |  |
| H                     | -1.95642400 -2.17735800 -0.73308800                                               |                                                                                    |  |  |
| N                     | 0.58162400 2.32870300 -0.39284900                                                 |                                                                                    |  |  |
| C                     | 1.19612900 -0.67038400 1.51419000                                                 |                                                                                    |  |  |
| H                     | 1.74715800 0.15770100 1.97136300                                                  |                                                                                    |  |  |
| H                     | 0.26420400 -0.81061800 2.06894600                                                 |                                                                                    |  |  |
| H                     | 1.79765200 -1.58303700 1.66643300                                                 |                                                                                    |  |  |
| C                     | 2.25156300 -0.10708400 -0.71904800                                                |                                                                                    |  |  |
| H                     | 2.03971100 0.21221100 -1.74328600                                                 |                                                                                    |  |  |
| H                     | 2.81472900 0.69214500 -0.22990500                                                 |                                                                                    |  |  |

| No.                   | Species                                                                             | Optimized Structure                                                                  |
|-----------------------|-------------------------------------------------------------------------------------|--------------------------------------------------------------------------------------|
| H                     | 2.89964400 -0.99749400 -0.76964300                                                  |                                                                                      |
| 36                    | 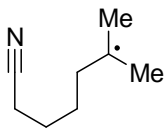   |    |
| Cartesian Coordinates |                                                                                     |                                                                                      |
| C                     | -0.77457100 0.85629900 -0.96010700                                                  |                                                                                      |
| C                     | -1.42507000 -0.09901300 0.00787200                                                  |                                                                                      |
| C                     | 1.62163900 -1.25973300 0.23001100                                                   |                                                                                      |
| C                     | 1.86580100 0.06863300 0.80075800                                                    |                                                                                      |
| C                     | 1.71808500 1.23286500 -0.21343500                                                   |                                                                                      |
| C                     | 0.30461300 1.81044000 -0.39808100                                                   |                                                                                      |
| H                     | -0.35062300 0.29139400 -1.80054300                                                  |                                                                                      |
| H                     | -1.56610700 1.49171500 -1.40519900                                                  |                                                                                      |
| H                     | 1.19490700 0.21073800 1.65533100                                                    |                                                                                      |
| H                     | 2.88827100 0.05468900 1.19739400                                                    |                                                                                      |
| H                     | 2.36645100 2.04444300 0.13746800                                                    |                                                                                      |
| H                     | 2.12206500 0.91343200 -1.18143900                                                   |                                                                                      |
| H                     | -0.03518300 2.23690000 0.55439600                                                   |                                                                                      |
| H                     | 0.39939800 2.66093600 -1.08491600                                                   |                                                                                      |
| N                     | 1.48588900 -2.31543800 -0.23608000                                                  |                                                                                      |
| C                     | -2.12677800 0.44676300 1.21695200                                                   |                                                                                      |
| H                     | -2.25544100 -0.32312700 1.98700700                                                  |                                                                                      |
| H                     | -1.60691200 1.29593000 1.67340000                                                   |                                                                                      |
| H                     | -3.14285400 0.80398900 0.96134400                                                   |                                                                                      |
| C                     | -1.90036500 -1.41726200 -0.52313600                                                 |                                                                                      |
| H                     | -2.14947300 -2.11409900 0.28509400                                                  |                                                                                      |
| H                     | -2.81670000 -1.29744600 -1.13212300                                                 |                                                                                      |
| H                     | -1.14914100 -1.89538000 -1.15966800                                                 |                                                                                      |
| 37                    |  |  |
| Cartesian Coordinates |                                                                                     |                                                                                      |
| C                     | 0.59185900 -1.53715800 -0.39779000                                                  |                                                                                      |
| C                     | 1.80495900 -0.75580100 0.13460100                                                   |                                                                                      |
| C                     | 1.80495200 0.75577700 -0.13467400                                                   |                                                                                      |
| C                     | -0.72161500 -1.28174300 0.36617200                                                  |                                                                                      |
| C                     | 0.59190000 1.53714200 0.39781900                                                    |                                                                                      |

| No.                   | Species                                                                           | Optimized Structure                                                                 |  |  |
|-----------------------|-----------------------------------------------------------------------------------|-------------------------------------------------------------------------------------|--|--|
| C                     | -1.47549400 0.00001000 0.00001700                                                 |                                                                                     |  |  |
| C                     | -0.72162400 1.28179200 -0.36607300                                                |                                                                                     |  |  |
| H                     | 0.45212300 -1.34129900 -1.46963900                                                |                                                                                     |  |  |
| H                     | 1.88163300 -0.92974400 1.21807500                                                 |                                                                                     |  |  |
| H                     | 1.88153800 0.92972000 -1.21815400                                                 |                                                                                     |  |  |
| H                     | 0.45222700 1.34125300 1.46966900                                                  |                                                                                     |  |  |
| H                     | -0.50663000 -1.23868900 1.44322400                                                |                                                                                     |  |  |
| H                     | 0.81265500 -2.60834700 -0.31467300                                                |                                                                                     |  |  |
| H                     | 2.71617300 -1.18187900 -0.30495100                                                |                                                                                     |  |  |
| H                     | 2.71620500 1.18184800 0.30480300                                                  |                                                                                     |  |  |
| H                     | -1.41551800 -2.11551900 0.22452100                                                |                                                                                     |  |  |
| H                     | 0.81271500 2.60832900 0.31472300                                                  |                                                                                     |  |  |
| H                     | -1.41551300 2.11556000 -0.22430800                                                |                                                                                     |  |  |
| H                     | -0.50671000 1.23883100 -1.44314300                                                |                                                                                     |  |  |
| N                     | -2.73293200 -0.00002500 -0.00008200                                               |                                                                                     |  |  |
| 38                    | 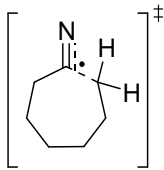 |  |  |  |
| Cartesian Coordinates |                                                                                   |                                                                                     |  |  |
| C                     | 0.19880600 1.62373300 0.45948800                                                  |                                                                                     |  |  |
| C                     | 1.19427100 1.09015600 -0.59542200                                                 |                                                                                     |  |  |
| C                     | 1.93389100 -0.19938100 -0.19162600                                                |                                                                                     |  |  |
| C                     | -1.27835800 1.23805100 0.25181500                                                 |                                                                                     |  |  |
| C                     | 1.08028100 -1.47481100 -0.10202200                                                |                                                                                     |  |  |
| C                     | -1.58823500 -0.16641800 -0.14656700                                               |                                                                                     |  |  |
| C                     | -0.05131800 -1.43439500 0.88280300                                                |                                                                                     |  |  |
| H                     | 0.52612500 1.31271500 1.45786000                                                  |                                                                                     |  |  |
| H                     | 0.68030000 0.94098400 -1.55503300                                                 |                                                                                     |  |  |
| H                     | 2.42665300 -0.02822500 0.77663700                                                 |                                                                                     |  |  |
| H                     | 0.68147000 -1.73230400 -1.09247600                                                |                                                                                     |  |  |
| H                     | -1.71306500 1.85895700 -0.54101700                                                |                                                                                     |  |  |
| H                     | 0.22504600 2.71973200 0.46846400                                                  |                                                                                     |  |  |
| H                     | 1.95253700 1.86130500 -0.77695800                                                 |                                                                                     |  |  |
| H                     | 2.74032400 -0.37876600 -0.91383900                                                |                                                                                     |  |  |
| H                     | -1.84818200 1.45178600 1.16417100                                                 |                                                                                     |  |  |
| H                     | 1.74830000 -2.31224400 0.16729900                                                 |                                                                                     |  |  |
| H                     | -0.68795200 -2.31103400 0.94550600                                                |                                                                                     |  |  |
| H                     | 0.09404300 -0.91216500 1.82790200                                                 |                                                                                     |  |  |
| N                     | -2.25166000 -0.93319300 -0.75419100                                               |                                                                                     |  |  |



| No.                                                                                                                                                                                                                                                                                                                                                                                                                                                                                                                                                                                                                                                                                                                                                                                                                                                                                                                                                                                                                                                                                                                                                                                                                                                                                                                                                                                                                                                                                                                                                                                                                                                                                                        | Species                                                                             | Optimized Structure                                                                  |             |             |             |             |   |             |             |            |   |             |             |             |   |             |             |            |   |            |             |            |   |             |            |            |   |            |             |             |   |             |             |             |   |             |             |            |   |            |             |             |   |            |            |            |   |             |            |            |   |             |             |             |   |            |             |             |   |            |             |             |   |             |             |            |   |            |            |            |   |            |            |            |   |            |            |             |   |             |            |             |
|------------------------------------------------------------------------------------------------------------------------------------------------------------------------------------------------------------------------------------------------------------------------------------------------------------------------------------------------------------------------------------------------------------------------------------------------------------------------------------------------------------------------------------------------------------------------------------------------------------------------------------------------------------------------------------------------------------------------------------------------------------------------------------------------------------------------------------------------------------------------------------------------------------------------------------------------------------------------------------------------------------------------------------------------------------------------------------------------------------------------------------------------------------------------------------------------------------------------------------------------------------------------------------------------------------------------------------------------------------------------------------------------------------------------------------------------------------------------------------------------------------------------------------------------------------------------------------------------------------------------------------------------------------------------------------------------------------|-------------------------------------------------------------------------------------|--------------------------------------------------------------------------------------|-------------|-------------|-------------|-------------|---|-------------|-------------|------------|---|-------------|-------------|-------------|---|-------------|-------------|------------|---|------------|-------------|------------|---|-------------|------------|------------|---|------------|-------------|-------------|---|-------------|-------------|-------------|---|-------------|-------------|------------|---|------------|-------------|-------------|---|------------|------------|------------|---|-------------|------------|------------|---|-------------|-------------|-------------|---|------------|-------------|-------------|---|------------|-------------|-------------|---|-------------|-------------|------------|---|------------|------------|------------|---|------------|------------|------------|---|------------|------------|-------------|---|-------------|------------|-------------|
| 39                                                                                                                                                                                                                                                                                                                                                                                                                                                                                                                                                                                                                                                                                                                                                                                                                                                                                                                                                                                                                                                                                                                                                                                                                                                                                                                                                                                                                                                                                                                                                                                                                                                                                                         | 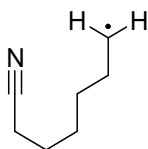   |    |             |             |             |             |   |             |             |            |   |             |             |             |   |             |             |            |   |            |             |            |   |             |            |            |   |            |             |             |   |             |             |             |   |             |             |            |   |            |             |             |   |            |            |            |   |             |            |            |   |             |             |             |   |            |             |             |   |            |             |             |   |             |             |            |   |            |            |            |   |            |            |            |   |            |            |             |   |             |            |             |
| <p>Cartesian Coordinates</p> <table border="1"> <tbody> <tr><td>C</td><td>-0.51336800</td><td>-1.09073000</td><td>-0.33162200</td></tr> <tr><td>C</td><td>0.89595800</td><td>-1.49629000</td><td>0.14559000</td></tr> <tr><td>C</td><td>2.09107500</td><td>-0.63098300</td><td>-0.30420500</td></tr> <tr><td>C</td><td>-1.20392600</td><td>-0.03557700</td><td>0.56087600</td></tr> <tr><td>C</td><td>2.24156500</td><td>0.77252600</td><td>0.32213300</td></tr> <tr><td>C</td><td>-2.55958300</td><td>0.28415400</td><td>0.10612800</td></tr> <tr><td>C</td><td>1.40238400</td><td>1.85104700</td><td>-0.27841500</td></tr> <tr><td>H</td><td>-0.47033800</td><td>-0.71928000</td><td>-1.36246300</td></tr> <tr><td>H</td><td>0.90022600</td><td>-1.58082600</td><td>1.24226400</td></tr> <tr><td>H</td><td>2.07504900</td><td>-0.53395000</td><td>-1.39907700</td></tr> <tr><td>H</td><td>2.07284500</td><td>0.71803000</td><td>1.40812500</td></tr> <tr><td>H</td><td>-0.62167700</td><td>0.89408400</td><td>0.57449800</td></tr> <tr><td>H</td><td>-1.15137900</td><td>-1.98140600</td><td>-0.35238400</td></tr> <tr><td>H</td><td>1.08386000</td><td>-2.51067600</td><td>-0.22754600</td></tr> <tr><td>H</td><td>2.99974000</td><td>-1.19888500</td><td>-0.06825200</td></tr> <tr><td>H</td><td>-1.26660500</td><td>-0.39792000</td><td>1.59441600</td></tr> <tr><td>H</td><td>3.30406000</td><td>1.06496500</td><td>0.22330300</td></tr> <tr><td>H</td><td>1.23253400</td><td>2.78232600</td><td>0.25402100</td></tr> <tr><td>H</td><td>1.13895000</td><td>1.82393900</td><td>-1.33238600</td></tr> <tr><td>N</td><td>-3.63169900</td><td>0.53067300</td><td>-0.26820300</td></tr> </tbody> </table> |                                                                                     |                                                                                      | C           | -0.51336800 | -1.09073000 | -0.33162200 | C | 0.89595800  | -1.49629000 | 0.14559000 | C | 2.09107500  | -0.63098300 | -0.30420500 | C | -1.20392600 | -0.03557700 | 0.56087600 | C | 2.24156500 | 0.77252600  | 0.32213300 | C | -2.55958300 | 0.28415400 | 0.10612800 | C | 1.40238400 | 1.85104700  | -0.27841500 | H | -0.47033800 | -0.71928000 | -1.36246300 | H | 0.90022600  | -1.58082600 | 1.24226400 | H | 2.07504900 | -0.53395000 | -1.39907700 | H | 2.07284500 | 0.71803000 | 1.40812500 | H | -0.62167700 | 0.89408400 | 0.57449800 | H | -1.15137900 | -1.98140600 | -0.35238400 | H | 1.08386000 | -2.51067600 | -0.22754600 | H | 2.99974000 | -1.19888500 | -0.06825200 | H | -1.26660500 | -0.39792000 | 1.59441600 | H | 3.30406000 | 1.06496500 | 0.22330300 | H | 1.23253400 | 2.78232600 | 0.25402100 | H | 1.13895000 | 1.82393900 | -1.33238600 | N | -3.63169900 | 0.53067300 | -0.26820300 |
| C                                                                                                                                                                                                                                                                                                                                                                                                                                                                                                                                                                                                                                                                                                                                                                                                                                                                                                                                                                                                                                                                                                                                                                                                                                                                                                                                                                                                                                                                                                                                                                                                                                                                                                          | -0.51336800                                                                         | -1.09073000                                                                          | -0.33162200 |             |             |             |   |             |             |            |   |             |             |             |   |             |             |            |   |            |             |            |   |             |            |            |   |            |             |             |   |             |             |             |   |             |             |            |   |            |             |             |   |            |            |            |   |             |            |            |   |             |             |             |   |            |             |             |   |            |             |             |   |             |             |            |   |            |            |            |   |            |            |            |   |            |            |             |   |             |            |             |
| C                                                                                                                                                                                                                                                                                                                                                                                                                                                                                                                                                                                                                                                                                                                                                                                                                                                                                                                                                                                                                                                                                                                                                                                                                                                                                                                                                                                                                                                                                                                                                                                                                                                                                                          | 0.89595800                                                                          | -1.49629000                                                                          | 0.14559000  |             |             |             |   |             |             |            |   |             |             |             |   |             |             |            |   |            |             |            |   |             |            |            |   |            |             |             |   |             |             |             |   |             |             |            |   |            |             |             |   |            |            |            |   |             |            |            |   |             |             |             |   |            |             |             |   |            |             |             |   |             |             |            |   |            |            |            |   |            |            |            |   |            |            |             |   |             |            |             |
| C                                                                                                                                                                                                                                                                                                                                                                                                                                                                                                                                                                                                                                                                                                                                                                                                                                                                                                                                                                                                                                                                                                                                                                                                                                                                                                                                                                                                                                                                                                                                                                                                                                                                                                          | 2.09107500                                                                          | -0.63098300                                                                          | -0.30420500 |             |             |             |   |             |             |            |   |             |             |             |   |             |             |            |   |            |             |            |   |             |            |            |   |            |             |             |   |             |             |             |   |             |             |            |   |            |             |             |   |            |            |            |   |             |            |            |   |             |             |             |   |            |             |             |   |            |             |             |   |             |             |            |   |            |            |            |   |            |            |            |   |            |            |             |   |             |            |             |
| C                                                                                                                                                                                                                                                                                                                                                                                                                                                                                                                                                                                                                                                                                                                                                                                                                                                                                                                                                                                                                                                                                                                                                                                                                                                                                                                                                                                                                                                                                                                                                                                                                                                                                                          | -1.20392600                                                                         | -0.03557700                                                                          | 0.56087600  |             |             |             |   |             |             |            |   |             |             |             |   |             |             |            |   |            |             |            |   |             |            |            |   |            |             |             |   |             |             |             |   |             |             |            |   |            |             |             |   |            |            |            |   |             |            |            |   |             |             |             |   |            |             |             |   |            |             |             |   |             |             |            |   |            |            |            |   |            |            |            |   |            |            |             |   |             |            |             |
| C                                                                                                                                                                                                                                                                                                                                                                                                                                                                                                                                                                                                                                                                                                                                                                                                                                                                                                                                                                                                                                                                                                                                                                                                                                                                                                                                                                                                                                                                                                                                                                                                                                                                                                          | 2.24156500                                                                          | 0.77252600                                                                           | 0.32213300  |             |             |             |   |             |             |            |   |             |             |             |   |             |             |            |   |            |             |            |   |             |            |            |   |            |             |             |   |             |             |             |   |             |             |            |   |            |             |             |   |            |            |            |   |             |            |            |   |             |             |             |   |            |             |             |   |            |             |             |   |             |             |            |   |            |            |            |   |            |            |            |   |            |            |             |   |             |            |             |
| C                                                                                                                                                                                                                                                                                                                                                                                                                                                                                                                                                                                                                                                                                                                                                                                                                                                                                                                                                                                                                                                                                                                                                                                                                                                                                                                                                                                                                                                                                                                                                                                                                                                                                                          | -2.55958300                                                                         | 0.28415400                                                                           | 0.10612800  |             |             |             |   |             |             |            |   |             |             |             |   |             |             |            |   |            |             |            |   |             |            |            |   |            |             |             |   |             |             |             |   |             |             |            |   |            |             |             |   |            |            |            |   |             |            |            |   |             |             |             |   |            |             |             |   |            |             |             |   |             |             |            |   |            |            |            |   |            |            |            |   |            |            |             |   |             |            |             |
| C                                                                                                                                                                                                                                                                                                                                                                                                                                                                                                                                                                                                                                                                                                                                                                                                                                                                                                                                                                                                                                                                                                                                                                                                                                                                                                                                                                                                                                                                                                                                                                                                                                                                                                          | 1.40238400                                                                          | 1.85104700                                                                           | -0.27841500 |             |             |             |   |             |             |            |   |             |             |             |   |             |             |            |   |            |             |            |   |             |            |            |   |            |             |             |   |             |             |             |   |             |             |            |   |            |             |             |   |            |            |            |   |             |            |            |   |             |             |             |   |            |             |             |   |            |             |             |   |             |             |            |   |            |            |            |   |            |            |            |   |            |            |             |   |             |            |             |
| H                                                                                                                                                                                                                                                                                                                                                                                                                                                                                                                                                                                                                                                                                                                                                                                                                                                                                                                                                                                                                                                                                                                                                                                                                                                                                                                                                                                                                                                                                                                                                                                                                                                                                                          | -0.47033800                                                                         | -0.71928000                                                                          | -1.36246300 |             |             |             |   |             |             |            |   |             |             |             |   |             |             |            |   |            |             |            |   |             |            |            |   |            |             |             |   |             |             |             |   |             |             |            |   |            |             |             |   |            |            |            |   |             |            |            |   |             |             |             |   |            |             |             |   |            |             |             |   |             |             |            |   |            |            |            |   |            |            |            |   |            |            |             |   |             |            |             |
| H                                                                                                                                                                                                                                                                                                                                                                                                                                                                                                                                                                                                                                                                                                                                                                                                                                                                                                                                                                                                                                                                                                                                                                                                                                                                                                                                                                                                                                                                                                                                                                                                                                                                                                          | 0.90022600                                                                          | -1.58082600                                                                          | 1.24226400  |             |             |             |   |             |             |            |   |             |             |             |   |             |             |            |   |            |             |            |   |             |            |            |   |            |             |             |   |             |             |             |   |             |             |            |   |            |             |             |   |            |            |            |   |             |            |            |   |             |             |             |   |            |             |             |   |            |             |             |   |             |             |            |   |            |            |            |   |            |            |            |   |            |            |             |   |             |            |             |
| H                                                                                                                                                                                                                                                                                                                                                                                                                                                                                                                                                                                                                                                                                                                                                                                                                                                                                                                                                                                                                                                                                                                                                                                                                                                                                                                                                                                                                                                                                                                                                                                                                                                                                                          | 2.07504900                                                                          | -0.53395000                                                                          | -1.39907700 |             |             |             |   |             |             |            |   |             |             |             |   |             |             |            |   |            |             |            |   |             |            |            |   |            |             |             |   |             |             |             |   |             |             |            |   |            |             |             |   |            |            |            |   |             |            |            |   |             |             |             |   |            |             |             |   |            |             |             |   |             |             |            |   |            |            |            |   |            |            |            |   |            |            |             |   |             |            |             |
| H                                                                                                                                                                                                                                                                                                                                                                                                                                                                                                                                                                                                                                                                                                                                                                                                                                                                                                                                                                                                                                                                                                                                                                                                                                                                                                                                                                                                                                                                                                                                                                                                                                                                                                          | 2.07284500                                                                          | 0.71803000                                                                           | 1.40812500  |             |             |             |   |             |             |            |   |             |             |             |   |             |             |            |   |            |             |            |   |             |            |            |   |            |             |             |   |             |             |             |   |             |             |            |   |            |             |             |   |            |            |            |   |             |            |            |   |             |             |             |   |            |             |             |   |            |             |             |   |             |             |            |   |            |            |            |   |            |            |            |   |            |            |             |   |             |            |             |
| H                                                                                                                                                                                                                                                                                                                                                                                                                                                                                                                                                                                                                                                                                                                                                                                                                                                                                                                                                                                                                                                                                                                                                                                                                                                                                                                                                                                                                                                                                                                                                                                                                                                                                                          | -0.62167700                                                                         | 0.89408400                                                                           | 0.57449800  |             |             |             |   |             |             |            |   |             |             |             |   |             |             |            |   |            |             |            |   |             |            |            |   |            |             |             |   |             |             |             |   |             |             |            |   |            |             |             |   |            |            |            |   |             |            |            |   |             |             |             |   |            |             |             |   |            |             |             |   |             |             |            |   |            |            |            |   |            |            |            |   |            |            |             |   |             |            |             |
| H                                                                                                                                                                                                                                                                                                                                                                                                                                                                                                                                                                                                                                                                                                                                                                                                                                                                                                                                                                                                                                                                                                                                                                                                                                                                                                                                                                                                                                                                                                                                                                                                                                                                                                          | -1.15137900                                                                         | -1.98140600                                                                          | -0.35238400 |             |             |             |   |             |             |            |   |             |             |             |   |             |             |            |   |            |             |            |   |             |            |            |   |            |             |             |   |             |             |             |   |             |             |            |   |            |             |             |   |            |            |            |   |             |            |            |   |             |             |             |   |            |             |             |   |            |             |             |   |             |             |            |   |            |            |            |   |            |            |            |   |            |            |             |   |             |            |             |
| H                                                                                                                                                                                                                                                                                                                                                                                                                                                                                                                                                                                                                                                                                                                                                                                                                                                                                                                                                                                                                                                                                                                                                                                                                                                                                                                                                                                                                                                                                                                                                                                                                                                                                                          | 1.08386000                                                                          | -2.51067600                                                                          | -0.22754600 |             |             |             |   |             |             |            |   |             |             |             |   |             |             |            |   |            |             |            |   |             |            |            |   |            |             |             |   |             |             |             |   |             |             |            |   |            |             |             |   |            |            |            |   |             |            |            |   |             |             |             |   |            |             |             |   |            |             |             |   |             |             |            |   |            |            |            |   |            |            |            |   |            |            |             |   |             |            |             |
| H                                                                                                                                                                                                                                                                                                                                                                                                                                                                                                                                                                                                                                                                                                                                                                                                                                                                                                                                                                                                                                                                                                                                                                                                                                                                                                                                                                                                                                                                                                                                                                                                                                                                                                          | 2.99974000                                                                          | -1.19888500                                                                          | -0.06825200 |             |             |             |   |             |             |            |   |             |             |             |   |             |             |            |   |            |             |            |   |             |            |            |   |            |             |             |   |             |             |             |   |             |             |            |   |            |             |             |   |            |            |            |   |             |            |            |   |             |             |             |   |            |             |             |   |            |             |             |   |             |             |            |   |            |            |            |   |            |            |            |   |            |            |             |   |             |            |             |
| H                                                                                                                                                                                                                                                                                                                                                                                                                                                                                                                                                                                                                                                                                                                                                                                                                                                                                                                                                                                                                                                                                                                                                                                                                                                                                                                                                                                                                                                                                                                                                                                                                                                                                                          | -1.26660500                                                                         | -0.39792000                                                                          | 1.59441600  |             |             |             |   |             |             |            |   |             |             |             |   |             |             |            |   |            |             |            |   |             |            |            |   |            |             |             |   |             |             |             |   |             |             |            |   |            |             |             |   |            |            |            |   |             |            |            |   |             |             |             |   |            |             |             |   |            |             |             |   |             |             |            |   |            |            |            |   |            |            |            |   |            |            |             |   |             |            |             |
| H                                                                                                                                                                                                                                                                                                                                                                                                                                                                                                                                                                                                                                                                                                                                                                                                                                                                                                                                                                                                                                                                                                                                                                                                                                                                                                                                                                                                                                                                                                                                                                                                                                                                                                          | 3.30406000                                                                          | 1.06496500                                                                           | 0.22330300  |             |             |             |   |             |             |            |   |             |             |             |   |             |             |            |   |            |             |            |   |             |            |            |   |            |             |             |   |             |             |             |   |             |             |            |   |            |             |             |   |            |            |            |   |             |            |            |   |             |             |             |   |            |             |             |   |            |             |             |   |             |             |            |   |            |            |            |   |            |            |            |   |            |            |             |   |             |            |             |
| H                                                                                                                                                                                                                                                                                                                                                                                                                                                                                                                                                                                                                                                                                                                                                                                                                                                                                                                                                                                                                                                                                                                                                                                                                                                                                                                                                                                                                                                                                                                                                                                                                                                                                                          | 1.23253400                                                                          | 2.78232600                                                                           | 0.25402100  |             |             |             |   |             |             |            |   |             |             |             |   |             |             |            |   |            |             |            |   |             |            |            |   |            |             |             |   |             |             |             |   |             |             |            |   |            |             |             |   |            |            |            |   |             |            |            |   |             |             |             |   |            |             |             |   |            |             |             |   |             |             |            |   |            |            |            |   |            |            |            |   |            |            |             |   |             |            |             |
| H                                                                                                                                                                                                                                                                                                                                                                                                                                                                                                                                                                                                                                                                                                                                                                                                                                                                                                                                                                                                                                                                                                                                                                                                                                                                                                                                                                                                                                                                                                                                                                                                                                                                                                          | 1.13895000                                                                          | 1.82393900                                                                           | -1.33238600 |             |             |             |   |             |             |            |   |             |             |             |   |             |             |            |   |            |             |            |   |             |            |            |   |            |             |             |   |             |             |             |   |             |             |            |   |            |             |             |   |            |            |            |   |             |            |            |   |             |             |             |   |            |             |             |   |            |             |             |   |             |             |            |   |            |            |            |   |            |            |            |   |            |            |             |   |             |            |             |
| N                                                                                                                                                                                                                                                                                                                                                                                                                                                                                                                                                                                                                                                                                                                                                                                                                                                                                                                                                                                                                                                                                                                                                                                                                                                                                                                                                                                                                                                                                                                                                                                                                                                                                                          | -3.63169900                                                                         | 0.53067300                                                                           | -0.26820300 |             |             |             |   |             |             |            |   |             |             |             |   |             |             |            |   |            |             |            |   |             |            |            |   |            |             |             |   |             |             |             |   |             |             |            |   |            |             |             |   |            |            |            |   |             |            |            |   |             |             |             |   |            |             |             |   |            |             |             |   |             |             |            |   |            |            |            |   |            |            |            |   |            |            |             |   |             |            |             |
| 40                                                                                                                                                                                                                                                                                                                                                                                                                                                                                                                                                                                                                                                                                                                                                                                                                                                                                                                                                                                                                                                                                                                                                                                                                                                                                                                                                                                                                                                                                                                                                                                                                                                                                                         |  |  |             |             |             |             |   |             |             |            |   |             |             |             |   |             |             |            |   |            |             |            |   |             |            |            |   |            |             |             |   |             |             |             |   |             |             |            |   |            |             |             |   |            |            |            |   |             |            |            |   |             |             |             |   |            |             |             |   |            |             |             |   |             |             |            |   |            |            |            |   |            |            |            |   |            |            |             |   |             |            |             |
| <p>Cartesian Coordinates</p> <table border="1"> <tbody> <tr><td>C</td><td>-1.68754700</td><td>1.07009000</td><td>-0.43859100</td></tr> <tr><td>C</td><td>-2.27904800</td><td>-0.25079100</td><td>0.07681100</td></tr> <tr><td>C</td><td>-1.40506700</td><td>-1.49647700</td><td>-0.12225900</td></tr> <tr><td>C</td><td>-0.48172400</td><td>1.58454000</td><td>0.37188200</td></tr> <tr><td>C</td><td>0.01414600</td><td>-1.43297800</td><td>0.46862800</td></tr> <tr><td>C</td><td>0.87979800</td><td>0.96565300</td><td>0.03325800</td></tr> <tr><td>C</td><td>1.01160700</td><td>-0.53434200</td><td>-0.29966500</td></tr> <tr><td>H</td><td>-1.42189200</td><td>0.98340100</td><td>-1.50087500</td></tr> <tr><td>H</td><td>-2.50286800</td><td>-0.13499300</td><td>1.14749700</td></tr> </tbody> </table>                                                                                                                                                                                                                                                                                                                                                                                                                                                                                                                                                                                                                                                                                                                                                                                                                                                                                              |                                                                                     |                                                                                      | C           | -1.68754700 | 1.07009000  | -0.43859100 | C | -2.27904800 | -0.25079100 | 0.07681100 | C | -1.40506700 | -1.49647700 | -0.12225900 | C | -0.48172400 | 1.58454000  | 0.37188200 | C | 0.01414600 | -1.43297800 | 0.46862800 | C | 0.87979800  | 0.96565300 | 0.03325800 | C | 1.01160700 | -0.53434200 | -0.29966500 | H | -1.42189200 | 0.98340100  | -1.50087500 | H | -2.50286800 | -0.13499300 | 1.14749700 |   |            |             |             |   |            |            |            |   |             |            |            |   |             |             |             |   |            |             |             |   |            |             |             |   |             |             |            |   |            |            |            |   |            |            |            |   |            |            |             |   |             |            |             |
| C                                                                                                                                                                                                                                                                                                                                                                                                                                                                                                                                                                                                                                                                                                                                                                                                                                                                                                                                                                                                                                                                                                                                                                                                                                                                                                                                                                                                                                                                                                                                                                                                                                                                                                          | -1.68754700                                                                         | 1.07009000                                                                           | -0.43859100 |             |             |             |   |             |             |            |   |             |             |             |   |             |             |            |   |            |             |            |   |             |            |            |   |            |             |             |   |             |             |             |   |             |             |            |   |            |             |             |   |            |            |            |   |             |            |            |   |             |             |             |   |            |             |             |   |            |             |             |   |             |             |            |   |            |            |            |   |            |            |            |   |            |            |             |   |             |            |             |
| C                                                                                                                                                                                                                                                                                                                                                                                                                                                                                                                                                                                                                                                                                                                                                                                                                                                                                                                                                                                                                                                                                                                                                                                                                                                                                                                                                                                                                                                                                                                                                                                                                                                                                                          | -2.27904800                                                                         | -0.25079100                                                                          | 0.07681100  |             |             |             |   |             |             |            |   |             |             |             |   |             |             |            |   |            |             |            |   |             |            |            |   |            |             |             |   |             |             |             |   |             |             |            |   |            |             |             |   |            |            |            |   |             |            |            |   |             |             |             |   |            |             |             |   |            |             |             |   |             |             |            |   |            |            |            |   |            |            |            |   |            |            |             |   |             |            |             |
| C                                                                                                                                                                                                                                                                                                                                                                                                                                                                                                                                                                                                                                                                                                                                                                                                                                                                                                                                                                                                                                                                                                                                                                                                                                                                                                                                                                                                                                                                                                                                                                                                                                                                                                          | -1.40506700                                                                         | -1.49647700                                                                          | -0.12225900 |             |             |             |   |             |             |            |   |             |             |             |   |             |             |            |   |            |             |            |   |             |            |            |   |            |             |             |   |             |             |             |   |             |             |            |   |            |             |             |   |            |            |            |   |             |            |            |   |             |             |             |   |            |             |             |   |            |             |             |   |             |             |            |   |            |            |            |   |            |            |            |   |            |            |             |   |             |            |             |
| C                                                                                                                                                                                                                                                                                                                                                                                                                                                                                                                                                                                                                                                                                                                                                                                                                                                                                                                                                                                                                                                                                                                                                                                                                                                                                                                                                                                                                                                                                                                                                                                                                                                                                                          | -0.48172400                                                                         | 1.58454000                                                                           | 0.37188200  |             |             |             |   |             |             |            |   |             |             |             |   |             |             |            |   |            |             |            |   |             |            |            |   |            |             |             |   |             |             |             |   |             |             |            |   |            |             |             |   |            |            |            |   |             |            |            |   |             |             |             |   |            |             |             |   |            |             |             |   |             |             |            |   |            |            |            |   |            |            |            |   |            |            |             |   |             |            |             |
| C                                                                                                                                                                                                                                                                                                                                                                                                                                                                                                                                                                                                                                                                                                                                                                                                                                                                                                                                                                                                                                                                                                                                                                                                                                                                                                                                                                                                                                                                                                                                                                                                                                                                                                          | 0.01414600                                                                          | -1.43297800                                                                          | 0.46862800  |             |             |             |   |             |             |            |   |             |             |             |   |             |             |            |   |            |             |            |   |             |            |            |   |            |             |             |   |             |             |             |   |             |             |            |   |            |             |             |   |            |            |            |   |             |            |            |   |             |             |             |   |            |             |             |   |            |             |             |   |             |             |            |   |            |            |            |   |            |            |            |   |            |            |             |   |             |            |             |
| C                                                                                                                                                                                                                                                                                                                                                                                                                                                                                                                                                                                                                                                                                                                                                                                                                                                                                                                                                                                                                                                                                                                                                                                                                                                                                                                                                                                                                                                                                                                                                                                                                                                                                                          | 0.87979800                                                                          | 0.96565300                                                                           | 0.03325800  |             |             |             |   |             |             |            |   |             |             |             |   |             |             |            |   |            |             |            |   |             |            |            |   |            |             |             |   |             |             |             |   |             |             |            |   |            |             |             |   |            |            |            |   |             |            |            |   |             |             |             |   |            |             |             |   |            |             |             |   |             |             |            |   |            |            |            |   |            |            |            |   |            |            |             |   |             |            |             |
| C                                                                                                                                                                                                                                                                                                                                                                                                                                                                                                                                                                                                                                                                                                                                                                                                                                                                                                                                                                                                                                                                                                                                                                                                                                                                                                                                                                                                                                                                                                                                                                                                                                                                                                          | 1.01160700                                                                          | -0.53434200                                                                          | -0.29966500 |             |             |             |   |             |             |            |   |             |             |             |   |             |             |            |   |            |             |            |   |             |            |            |   |            |             |             |   |             |             |             |   |             |             |            |   |            |             |             |   |            |            |            |   |             |            |            |   |             |             |             |   |            |             |             |   |            |             |             |   |             |             |            |   |            |            |            |   |            |            |            |   |            |            |             |   |             |            |             |
| H                                                                                                                                                                                                                                                                                                                                                                                                                                                                                                                                                                                                                                                                                                                                                                                                                                                                                                                                                                                                                                                                                                                                                                                                                                                                                                                                                                                                                                                                                                                                                                                                                                                                                                          | -1.42189200                                                                         | 0.98340100                                                                           | -1.50087500 |             |             |             |   |             |             |            |   |             |             |             |   |             |             |            |   |            |             |            |   |             |            |            |   |            |             |             |   |             |             |             |   |             |             |            |   |            |             |             |   |            |            |            |   |             |            |            |   |             |             |             |   |            |             |             |   |            |             |             |   |             |             |            |   |            |            |            |   |            |            |            |   |            |            |             |   |             |            |             |
| H                                                                                                                                                                                                                                                                                                                                                                                                                                                                                                                                                                                                                                                                                                                                                                                                                                                                                                                                                                                                                                                                                                                                                                                                                                                                                                                                                                                                                                                                                                                                                                                                                                                                                                          | -2.50286800                                                                         | -0.13499300                                                                          | 1.14749700  |             |             |             |   |             |             |            |   |             |             |             |   |             |             |            |   |            |             |            |   |             |            |            |   |            |             |             |   |             |             |             |   |             |             |            |   |            |             |             |   |            |            |            |   |             |            |            |   |             |             |             |   |            |             |             |   |            |             |             |   |             |             |            |   |            |            |            |   |            |            |            |   |            |            |             |   |             |            |             |

| No.                   | Species                                                                           | Optimized Structure                                                                |  |  |
|-----------------------|-----------------------------------------------------------------------------------|------------------------------------------------------------------------------------|--|--|
| H                     | -1.32350200 -1.71359700 -1.19745300                                               |                                                                                    |  |  |
| H                     | -0.02282100 -1.14023700 1.52713400                                                |                                                                                    |  |  |
| H                     | -0.66639200 1.40798200 1.44073500                                                 |                                                                                    |  |  |
| H                     | -2.46775800 1.83920400 -0.38570400                                                |                                                                                    |  |  |
| H                     | -3.24410800 -0.42317200 -0.41715000                                               |                                                                                    |  |  |
| H                     | -1.92797000 -2.35474200 0.31909100                                                |                                                                                    |  |  |
| H                     | -0.37669900 2.66672000 0.25276300                                                 |                                                                                    |  |  |
| H                     | 0.42692100 -2.44929600 0.45617100                                                 |                                                                                    |  |  |
| H                     | 0.76133200 -0.61082600 -1.36938000                                                |                                                                                    |  |  |
| N                     | 1.88748200 1.71746100 0.02279300                                                  |                                                                                    |  |  |
| C                     | 2.46065400 -1.01680200 -0.12392500                                                |                                                                                    |  |  |
| H                     | 2.55975900 -2.04700200 -0.48186000                                                |                                                                                    |  |  |
| H                     | 3.16165800 -0.38780300 -0.67825100                                                |                                                                                    |  |  |
| H                     | 2.75504600 -0.99122400 0.93089600                                                 |                                                                                    |  |  |
| 41                    | 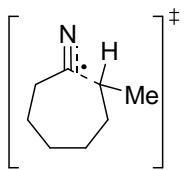 |  |  |  |
| Cartesian Coordinates |                                                                                   |                                                                                    |  |  |
| C                     | -1.82164900 0.52903900 -0.70107400                                                |                                                                                    |  |  |
| C                     | -1.93999700 -0.53788000 0.40896200                                                |                                                                                    |  |  |
| C                     | -1.01689800 -1.75867300 0.23098500                                                |                                                                                    |  |  |
| C                     | -0.86233300 1.70224100 -0.40801600                                                |                                                                                    |  |  |
| C                     | 0.49346700 -1.51882800 0.39348800                                                 |                                                                                    |  |  |
| C                     | 0.40287200 1.39085800 0.32214100                                                  |                                                                                    |  |  |
| C                     | 1.11780000 -0.52490900 -0.55071200                                                |                                                                                    |  |  |
| H                     | -1.53923700 0.04044900 -1.64038300                                                |                                                                                    |  |  |
| H                     | -1.76955200 -0.07815700 1.39212600                                                |                                                                                    |  |  |
| H                     | -1.20448600 -2.19116300 -0.76284000                                               |                                                                                    |  |  |
| H                     | 0.72103800 -1.21867900 1.42571600                                                 |                                                                                    |  |  |
| H                     | -1.37206000 2.44867900 0.21276900                                                 |                                                                                    |  |  |
| H                     | -2.80418600 0.97845800 -0.88608500                                                |                                                                                    |  |  |
| H                     | -2.97232900 -0.90786700 0.42422800                                                |                                                                                    |  |  |
| H                     | -1.31592200 -2.52715200 0.95491400                                                |                                                                                    |  |  |
| H                     | -0.59234400 2.20469000 -1.34450600                                                |                                                                                    |  |  |
| H                     | 1.00530300 -2.48842500 0.25506000                                                 |                                                                                    |  |  |
| H                     | 0.65618000 -0.44090300 -1.53584000                                                |                                                                                    |  |  |
| N                     | 1.17984500 1.69918600 1.16045900                                                  |                                                                                    |  |  |
| C                     | 2.61191300 -0.38721500 -0.53356600                                                |                                                                                    |  |  |
| H                     | 3.08316100 -1.30935900 -0.91009300                                                |                                                                                    |  |  |
| H                     | 2.95330900 0.43984500 -1.16317000                                                 |                                                                                    |  |  |

| No.                   | Species                                                                             | Optimized Structure                                                                  |
|-----------------------|-------------------------------------------------------------------------------------|--------------------------------------------------------------------------------------|
| H                     | 2.98116700 -0.21251800 0.48164200                                                   |                                                                                      |
| 42                    | 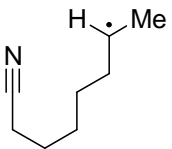   |    |
| Cartesian Coordinates |                                                                                     |                                                                                      |
| C                     | -1.05390200 -1.26989200 -0.28113100                                                 |                                                                                      |
| C                     | 0.20316100 -2.01610000 0.20985400                                                   |                                                                                      |
| C                     | 1.57784900 -1.53114900 -0.29490700                                                  |                                                                                      |
| C                     | -1.40976600 -0.01854600 0.55223700                                                  |                                                                                      |
| C                     | 2.10847200 -0.18436000 0.23903700                                                   |                                                                                      |
| C                     | -2.63482700 0.63722300 0.08727100                                                   |                                                                                      |
| C                     | 1.59325700 1.04477500 -0.44122500                                                   |                                                                                      |
| H                     | -0.93471500 -0.98142900 -1.33229300                                                 |                                                                                      |
| H                     | 0.20761600 -2.03986300 1.30956600                                                   |                                                                                      |
| H                     | 1.56817200 -1.50079200 -1.39375300                                                  |                                                                                      |
| H                     | 1.93209600 -0.11659700 1.32518700                                                   |                                                                                      |
| H                     | -0.59430000 0.71358700 0.50676300                                                   |                                                                                      |
| H                     | -1.91029900 -1.95256700 -0.24420000                                                 |                                                                                      |
| H                     | 0.10216300 -3.06201000 -0.10577000                                                  |                                                                                      |
| H                     | 2.30476100 -2.30732300 -0.02503300                                                  |                                                                                      |
| H                     | -1.54746600 -0.29274200 1.60539000                                                  |                                                                                      |
| H                     | 3.21188300 -0.19769800 0.14402200                                                   |                                                                                      |
| H                     | 1.27215200 0.95915500 -1.47849500                                                   |                                                                                      |
| N                     | -3.60522100 1.14984100 -0.29480300                                                  |                                                                                      |
| C                     | 1.89315000 2.40551400 0.09777100                                                    |                                                                                      |
| H                     | 2.95178300 2.68230600 -0.05645100                                                   |                                                                                      |
| H                     | 1.28907500 3.17989600 -0.38574400                                                   |                                                                                      |
| H                     | 1.71925900 2.46241000 1.18098800                                                    |                                                                                      |
| 43                    |  |  |
| Cartesian Coordinates |                                                                                     |                                                                                      |
| C                     | -3.40495600 0.45755300 -0.41324300                                                  |                                                                                      |
| C                     | -3.48658500 -0.90133200 0.29598300                                                  |                                                                                      |
| C                     | -2.25260600 -1.80206100 0.15263600                                                  |                                                                                      |
| C                     | -2.36938400 1.42689400 0.19183900                                                   |                                                                                      |
| C                     | -0.91393200 -1.20846700 0.62753300                                                  |                                                                                      |

| No.                   | Species                                                                             | Optimized Structure                                                                  |  |  |
|-----------------------|-------------------------------------------------------------------------------------|--------------------------------------------------------------------------------------|--|--|
| C                     | -0.92454500 1.23765000 -0.27671300                                                  |                                                                                      |  |  |
| C                     | -0.27610200 -0.16596400 -0.33057000                                                 |                                                                                      |  |  |
| H                     | -3.20908400 0.31942100 -1.48520500                                                  |                                                                                      |  |  |
| H                     | -3.67963200 -0.72453300 1.36429200                                                  |                                                                                      |  |  |
| H                     | -2.14522000 -2.10882200 -0.89823700                                                 |                                                                                      |  |  |
| H                     | -1.01530600 -0.78701400 1.63644800                                                  |                                                                                      |  |  |
| H                     | -2.38275100 1.33395800 1.28693100                                                   |                                                                                      |  |  |
| H                     | -4.38708600 0.94104800 -0.34589000                                                  |                                                                                      |  |  |
| H                     | -4.36007600 -1.44704600 -0.08363000                                                 |                                                                                      |  |  |
| H                     | -2.43735300 -2.72502100 0.71707400                                                  |                                                                                      |  |  |
| H                     | -2.64052600 2.46169900 -0.03602700                                                  |                                                                                      |  |  |
| H                     | -0.19277300 -2.02814900 0.71794400                                                  |                                                                                      |  |  |
| N                     | -0.28254900 2.25301600 -0.64767800                                                  |                                                                                      |  |  |
| H                     | -0.46639800 -0.52206200 -1.35296800                                                 |                                                                                      |  |  |
| C                     | 1.23668700 -0.10715300 -0.15264000                                                  |                                                                                      |  |  |
| C                     | 2.08213100 -0.66371600 -1.12027500                                                  |                                                                                      |  |  |
| C                     | 1.81400000 0.44182800 1.00241400                                                    |                                                                                      |  |  |
| C                     | 3.46938200 -0.67387900 -0.94439600                                                  |                                                                                      |  |  |
| H                     | 1.65367300 -1.08769800 -2.02546100                                                  |                                                                                      |  |  |
| C                     | 3.19737900 0.43188000 1.18361800                                                    |                                                                                      |  |  |
| H                     | 1.18016400 0.89545900 1.75941600                                                    |                                                                                      |  |  |
| C                     | 4.03173200 -0.12728800 0.21025000                                                   |                                                                                      |  |  |
| H                     | 4.10676800 -1.10440100 -1.71163300                                                  |                                                                                      |  |  |
| H                     | 3.62535800 0.86695600 2.08239700                                                    |                                                                                      |  |  |
| H                     | 5.10888100 -0.13057100 0.34968200                                                   |                                                                                      |  |  |
| 44                    | 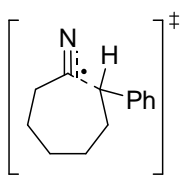 |  |  |  |
| Cartesian Coordinates |                                                                                     |                                                                                      |  |  |
| C                     | 3.13553800 -0.84082100 -0.62255900                                                  |                                                                                      |  |  |
| C                     | 3.37942500 0.57689400 -0.06323200                                                   |                                                                                      |  |  |
| C                     | 2.39818800 1.65284700 -0.56999500                                                   |                                                                                      |  |  |
| C                     | 2.17803900 -1.73826600 0.20059800                                                   |                                                                                      |  |  |
| C                     | 0.93878600 1.56738800 -0.08933300                                                   |                                                                                      |  |  |
| C                     | 1.09986400 -1.02155000 0.95538400                                                   |                                                                                      |  |  |
| C                     | 0.22011900 0.28193600 -0.44429400                                                   |                                                                                      |  |  |
| H                     | 2.77684900 -0.75825000 -1.65549000                                                  |                                                                                      |  |  |
| H                     | 3.38052400 0.55299900 1.03470300                                                    |                                                                                      |  |  |
| H                     | 2.41063700 1.63842000 -1.66977500                                                   |                                                                                      |  |  |
| H                     | 0.89366300 1.73006900 0.99405400                                                    |                                                                                      |  |  |

| No.                   | Species                                                                            | Optimized Structure                                                                 |  |  |
|-----------------------|------------------------------------------------------------------------------------|-------------------------------------------------------------------------------------|--|--|
| H                     | 2.74404600 -2.29117800 0.95822000                                                  |                                                                                     |  |  |
| H                     | 4.08855500 -1.37840100 -0.68440800                                                 |                                                                                     |  |  |
| H                     | 4.38725000 0.89124600 -0.36060100                                                  |                                                                                     |  |  |
| H                     | 2.78587200 2.63677600 -0.27812900                                                  |                                                                                     |  |  |
| H                     | 1.70655000 -2.48344300 -0.45044300                                                 |                                                                                     |  |  |
| H                     | 0.38617900 2.40554100 -0.54258200                                                  |                                                                                     |  |  |
| N                     | 0.61365300 -0.88016400 2.03306400                                                  |                                                                                     |  |  |
| C                     | -1.22790600 0.16447100 -0.29239700                                                 |                                                                                     |  |  |
| C                     | -1.95023100 -0.72676200 -1.11590000                                                |                                                                                     |  |  |
| C                     | -1.94782100 0.90508400 0.66910300                                                  |                                                                                     |  |  |
| C                     | -3.33083200 -0.86618200 -0.99315000                                                |                                                                                     |  |  |
| H                     | -1.41546200 -1.30838700 -1.86344600                                                |                                                                                     |  |  |
| C                     | -3.32855600 0.76475400 0.79152600                                                  |                                                                                     |  |  |
| H                     | -1.41958000 1.57952200 1.33454100                                                  |                                                                                     |  |  |
| C                     | -4.02845300 -0.11915400 -0.03754700                                                |                                                                                     |  |  |
| H                     | -3.86415100 -1.55475300 -1.64249200                                                |                                                                                     |  |  |
| H                     | -3.86191100 1.34203800 1.54150500                                                  |                                                                                     |  |  |
| H                     | -5.10463300 -0.22619000 0.06193600                                                 |                                                                                     |  |  |
| H                     | 0.59306900 -0.21870500 -1.33826700                                                 |                                                                                     |  |  |
| 45                    | 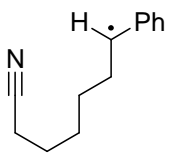 |  |  |  |
| Cartesian Coordinates |                                                                                    |                                                                                     |  |  |
| C                     | 3.04579600 0.16930400 0.15307200                                                   |                                                                                     |  |  |
| C                     | 3.06118000 -1.32375100 -0.23541300                                                 |                                                                                     |  |  |
| C                     | 2.02045600 -2.25460000 0.41992600                                                  |                                                                                     |  |  |
| C                     | 2.09894900 1.03894200 -0.70547100                                                  |                                                                                     |  |  |
| C                     | 0.54295400 -2.07957100 0.01203600                                                  |                                                                                     |  |  |
| C                     | 2.15780300 2.45586600 -0.33473900                                                  |                                                                                     |  |  |
| C                     | -0.19406600 -0.98849800 0.73048300                                                 |                                                                                     |  |  |
| H                     | 2.78265800 0.28364300 1.21135700                                                   |                                                                                     |  |  |
| H                     | 2.99278200 -1.41629600 -1.32920100                                                 |                                                                                     |  |  |
| H                     | 2.10315200 -2.17692800 1.51319100                                                  |                                                                                     |  |  |
| H                     | 0.48005900 -1.94071000 -1.07788400                                                 |                                                                                     |  |  |
| H                     | 1.06008200 0.70642500 -0.60574400                                                  |                                                                                     |  |  |
| H                     | 4.05781800 0.57500800 0.04475300                                                   |                                                                                     |  |  |
| H                     | 4.04892400 -1.71956900 0.03115500                                                  |                                                                                     |  |  |
| H                     | 2.31527500 -3.28168100 0.17200800                                                  |                                                                                     |  |  |
| H                     | 2.36773000 0.95250600 -1.76546600                                                  |                                                                                     |  |  |
| H                     | 0.02485900 -3.03588100 0.20132200                                                  |                                                                                     |  |  |

| No.                   | Species                                                                           | Optimized Structure                                                                |  |  |
|-----------------------|-----------------------------------------------------------------------------------|------------------------------------------------------------------------------------|--|--|
| N                     | 2.21789900 3.57420400 -0.02520700                                                 |                                                                                    |  |  |
| H                     | 0.24149900 -0.61806300 1.65705800                                                 |                                                                                    |  |  |
| C                     | -1.45957400 -0.46650100 0.35870900                                                |                                                                                    |  |  |
| C                     | -2.07260800 0.55107200 1.15071400                                                 |                                                                                    |  |  |
| C                     | -2.17418500 -0.91140000 -0.79351900                                               |                                                                                    |  |  |
| C                     | -3.30603500 1.08660500 0.81044800                                                 |                                                                                    |  |  |
| H                     | -1.55139400 0.91019800 2.03450200                                                 |                                                                                    |  |  |
| C                     | -3.41070700 -0.36921900 -1.12340200                                               |                                                                                    |  |  |
| H                     | -1.75092000 -1.69016700 -1.41988200                                               |                                                                                    |  |  |
| C                     | -3.98764200 0.63238000 -0.32971000                                                |                                                                                    |  |  |
| H                     | -3.74464300 1.86323100 1.43056200                                                 |                                                                                    |  |  |
| H                     | -3.93422900 -0.72781800 -2.00542900                                               |                                                                                    |  |  |
| H                     | -4.95286000 1.05290100 -0.59465800                                                |                                                                                    |  |  |
| 46                    | 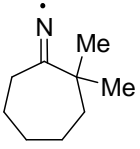 |  |  |  |
| Cartesian Coordinates |                                                                                   |                                                                                    |  |  |
| C                     | -2.16718700 0.79500300 -0.05978800                                                |                                                                                    |  |  |
| C                     | -2.30519200 -0.73113600 0.03378300                                                |                                                                                    |  |  |
| C                     | -1.09581800 -1.54367400 -0.46166700                                               |                                                                                    |  |  |
| C                     | -0.91505600 1.38839500 0.62114600                                                 |                                                                                    |  |  |
| C                     | 0.15699600 -1.41067300 0.42880800                                                 |                                                                                    |  |  |
| C                     | 0.36922100 1.07782900 -0.15661200                                                 |                                                                                    |  |  |
| C                     | 1.13364500 -0.24693300 0.10586500                                                 |                                                                                    |  |  |
| H                     | -2.16414600 1.10563000 -1.11210900                                                |                                                                                    |  |  |
| H                     | -2.50494700 -1.01107800 1.07859400                                                |                                                                                    |  |  |
| H                     | -0.85861500 -1.26799000 -1.49819900                                               |                                                                                    |  |  |
| H                     | -0.16554400 -1.33956400 1.47631300                                                |                                                                                    |  |  |
| H                     | -0.82315800 1.01569200 1.64890300                                                 |                                                                                    |  |  |
| H                     | -3.05248800 1.25576400 0.39678900                                                 |                                                                                    |  |  |
| H                     | -3.19468700 -1.03018500 -0.53551400                                               |                                                                                    |  |  |
| H                     | -1.38899900 -2.60014900 -0.49139500                                               |                                                                                    |  |  |
| H                     | -1.01645500 2.47600200 0.67472900                                                 |                                                                                    |  |  |
| H                     | 0.74910900 -2.33246900 0.36596200                                                 |                                                                                    |  |  |
| N                     | 0.78749000 1.91631200 -0.99247500                                                 |                                                                                    |  |  |
| C                     | 2.05358400 -0.01046800 1.32629200                                                 |                                                                                    |  |  |
| H                     | 2.56810800 -0.94225600 1.58971300                                                 |                                                                                    |  |  |
| H                     | 2.80942600 0.74901200 1.10485400                                                  |                                                                                    |  |  |
| H                     | 1.48684600 0.31637800 2.20499900                                                  |                                                                                    |  |  |
| C                     | 1.99992800 -0.60438200 -1.11810000                                                |                                                                                    |  |  |

| No.                   | Species                                                                             | Optimized Structure                                                                  |
|-----------------------|-------------------------------------------------------------------------------------|--------------------------------------------------------------------------------------|
| H                     | 1.38546300 -0.81170300 -1.99940700                                                  |                                                                                      |
| H                     | 2.67737600 0.21447200 -1.37436600                                                   |                                                                                      |
| H                     | 2.59955300 -1.49549400 -0.90090300                                                  |                                                                                      |
| 47                    | 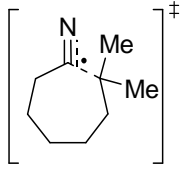   |    |
| Cartesian Coordinates |                                                                                     |                                                                                      |
| C                     | 2.33492600 0.43579900 0.23063800                                                    |                                                                                      |
| C                     | 1.97136600 -0.76918600 -0.65326000                                                  |                                                                                      |
| C                     | 0.91831800 -1.74518900 -0.08307500                                                  |                                                                                      |
| C                     | 1.13922700 1.18571900 0.85645900                                                    |                                                                                      |
| C                     | -0.53281600 -1.45666100 -0.52513200                                                 |                                                                                      |
| C                     | 0.03383000 1.43266500 -0.12020800                                                   |                                                                                      |
| C                     | -1.29486200 -0.29342700 0.08473700                                                  |                                                                                      |
| H                     | 2.97945400 0.10972500 1.05720000                                                    |                                                                                      |
| H                     | 1.61850800 -0.40412500 -1.62632200                                                  |                                                                                      |
| H                     | 0.99254100 -1.79599500 1.01189200                                                   |                                                                                      |
| H                     | -0.53934700 -1.34781600 -1.61698100                                                 |                                                                                      |
| H                     | 1.46919200 2.16333900 1.22536900                                                    |                                                                                      |
| H                     | 2.92373400 1.14109000 -0.36673600                                                   |                                                                                      |
| H                     | 2.89949700 -1.31687100 -0.85701500                                                  |                                                                                      |
| H                     | 1.15758900 -2.75492000 -0.43709400                                                  |                                                                                      |
| H                     | 0.75786900 0.63309300 1.71520700                                                    |                                                                                      |
| H                     | -1.13467200 -2.36012300 -0.31360700                                                 |                                                                                      |
| N                     | -0.38605500 2.16718400 -0.95528700                                                  |                                                                                      |
| C                     | -2.49391400 0.14041200 -0.72384500                                                  |                                                                                      |
| H                     | -3.23399000 -0.67552900 -0.75072300                                                 |                                                                                      |
| H                     | -2.97968700 1.01813300 -0.28800000                                                  |                                                                                      |
| H                     | -2.22064400 0.38650800 -1.75266400                                                  |                                                                                      |
| C                     | -1.57196000 -0.38201900 1.56913500                                                  |                                                                                      |
| H                     | -0.72697400 -0.76118600 2.15097900                                                  |                                                                                      |
| H                     | -1.87613300 0.58495600 1.98444000                                                   |                                                                                      |
| H                     | -2.40924700 -1.07924800 1.73836600                                                  |                                                                                      |
| 48                    |  |  |
| Cartesian Coordinates |                                                                                     |                                                                                      |

| No. | Species     | Optimized Structure |             |
|-----|-------------|---------------------|-------------|
| C   | -1.36538800 | 1.28048700          | 0.26919600  |
| C   | -0.19196200 | 2.15545700          | -0.21479700 |
| C   | 1.23403600  | 1.78306400          | 0.24515900  |
| C   | -1.59510300 | 0.00835200          | -0.57535100 |
| C   | 1.92606700  | 0.57957700          | -0.43595000 |
| C   | -2.73386800 | -0.78413200         | -0.10560100 |
| C   | 1.57058300  | -0.81507000         | 0.01023800  |
| H   | -1.21410900 | 0.99482300          | 1.31703800  |
| H   | -0.21484100 | 2.22389600          | -1.31252700 |
| H   | 1.23963500  | 1.65579700          | 1.33524700  |
| H   | 1.78263800  | 0.65933900          | -1.52290100 |
| H   | -0.69982600 | -0.62655100         | -0.55050100 |
| H   | -2.28569800 | 1.87490300          | 0.24239200  |
| H   | -0.38344100 | 3.17344300          | 0.14686500  |
| H   | 1.86434500  | 2.66015000          | 0.05182300  |
| H   | -1.77434000 | 0.27804500          | -1.62351400 |
| H   | 3.01675900  | 0.71083500          | -0.28504000 |
| N   | -3.63519500 | -1.40809800         | 0.28033700  |
| C   | 1.84002900  | -1.93372200         | -0.95343400 |
| H   | 2.91657400  | -2.18689600         | -0.98698900 |
| H   | 1.31434000  | -2.85306400         | -0.67023500 |
| H   | 1.55072000  | -1.67349400         | -1.97857700 |
| C   | 1.57550500  | -1.15367200         | 1.47168400  |
| H   | 1.08921600  | -0.39170200         | 2.08912800  |
| H   | 1.07648700  | -2.11013200         | 1.66332600  |
| H   | 2.60851800  | -1.25475700         | 1.85522700  |



### 7.3 Activation Energy ( $\Delta G^\ddagger$ ) and Reaction Energy ( $\Delta G^\circ$ ) for 1,5-H atom Abstraction

| No. | 1,5-H-atom abstraction | $\Delta G^\ddagger$ | $\Delta G$ |
|-----|------------------------|---------------------|------------|
| 1   |                        | 18.2                | 11.0       |
| 2   |                        | 15.7                | 6.7        |
| 3   |                        | 13.1                | -2.1       |
| 4   |                        | 13.7                | 4.2        |
| 5   |                        | 1.9                 | -15.8      |
| 6   |                        |                     | -21.2      |
| 7   |                        |                     | -24.6      |
| 8   |                        |                     | -24.9      |

**DFT Method:** UB3LYP/6-31+G(d,p) [values are in Kcal mol<sup>-1</sup>]

**Computed Energies** [values are in Hartree]

| No. | Species                                                                             | Total Electronic Energy | Sum of Electronic and Zero-point Energies | Gibbs Free Energy |
|-----|-------------------------------------------------------------------------------------|-------------------------|-------------------------------------------|-------------------|
| 1   | 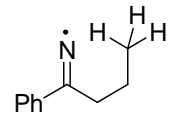   | -443.0235649            | -442.829472                               | -442.867708       |
| 2   |    | -442.9914959            | -442.802530                               | -442.838714       |
| 3   |    | -443.0050384            | -442.812436                               | -442.850257       |
| 4   |    | -482.3410005            | -482.118455                               | -482.158831       |
| 5   |   | -482.3126879            | -482.095479                               | -482.133745       |
| 6   |  | -482.3286596            | -482.107689                               | -482.148180       |
| 7   |  | -674.0885445            | -673.813030                               | -673.859863       |
| 8   |  | -674.0658605            | -673.795136                               | -673.838936       |
| 9   |  | -674.0936418            | -673.818234                               | -673.863262       |
| 10  |  | -521.6577733            | -521.407302                               | -521.449929       |

| No. | Species                                                                             | Total Electronic Energy | Sum of Electronic and Zero-point Energies | Gibbs Free Energy |
|-----|-------------------------------------------------------------------------------------|-------------------------|-------------------------------------------|-------------------|
| 11  | 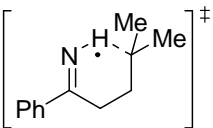   | -521.6332498            | -521.388149                               | -521.428127       |
| 12  |    | -521.6504017            | -521.400957                               | -521.443224       |
| 13  |    | -443.3647098            | -443.160177                               | -443.197973       |
| 14  |    | -443.3619859            | -443.159096                               | -443.195650       |
| 15  |   | -443.3931927            | -443.186642                               | -443.223797       |
| 16  |  | -482.6838595            | -482.450670                               | -482.490647       |
| 17  |  | -482.7193286            | -482.484544                               | -482.524409       |
| 18  |  | -674.4433058            | -674.156379                               | -674.202150       |
| 19  |  | -674.4850309            | -674.196189                               | -674.241345       |
| 20  |  | -522.0013441            | -521.740222                               | -521.781792       |

| No. | Species | Total Electronic Energy | Sum of Electronic and Zero-point Energies | Gibbs Free Energy |
|-----|---------|-------------------------|-------------------------------------------|-------------------|
| 21  |         | -522.0425908            | -521.779580                               | -521.821416       |

## Optimized Structures and Cartesian Coordinates

| No.                                                                                                                                                                                                                                                                                                                                                                                                                                                                                                                                                                                                                                                                                                                                                                                                                                                                                                                                                                                                                                                                                                                                                                                                                                                                                                                                                                                                                                                                                                                                                                                                                                                                                                                                                                                                                                                                                                                                   | Species                                                                             | Optimized Structure                                                                  |             |             |             |             |   |             |             |             |   |             |             |             |   |             |             |             |   |             |             |             |   |             |             |             |   |             |             |             |   |             |            |             |   |             |            |            |   |             |            |            |   |            |            |             |   |            |             |             |   |            |            |            |   |            |             |            |   |            |             |             |   |            |            |            |   |            |            |            |   |            |             |            |   |            |             |            |   |            |            |            |   |            |             |            |   |             |            |            |   |             |             |            |
|---------------------------------------------------------------------------------------------------------------------------------------------------------------------------------------------------------------------------------------------------------------------------------------------------------------------------------------------------------------------------------------------------------------------------------------------------------------------------------------------------------------------------------------------------------------------------------------------------------------------------------------------------------------------------------------------------------------------------------------------------------------------------------------------------------------------------------------------------------------------------------------------------------------------------------------------------------------------------------------------------------------------------------------------------------------------------------------------------------------------------------------------------------------------------------------------------------------------------------------------------------------------------------------------------------------------------------------------------------------------------------------------------------------------------------------------------------------------------------------------------------------------------------------------------------------------------------------------------------------------------------------------------------------------------------------------------------------------------------------------------------------------------------------------------------------------------------------------------------------------------------------------------------------------------------------|-------------------------------------------------------------------------------------|--------------------------------------------------------------------------------------|-------------|-------------|-------------|-------------|---|-------------|-------------|-------------|---|-------------|-------------|-------------|---|-------------|-------------|-------------|---|-------------|-------------|-------------|---|-------------|-------------|-------------|---|-------------|-------------|-------------|---|-------------|------------|-------------|---|-------------|------------|------------|---|-------------|------------|------------|---|------------|------------|-------------|---|------------|-------------|-------------|---|------------|------------|------------|---|------------|-------------|------------|---|------------|-------------|-------------|---|------------|------------|------------|---|------------|------------|------------|---|------------|-------------|------------|---|------------|-------------|------------|---|------------|------------|------------|---|------------|-------------|------------|---|-------------|------------|------------|---|-------------|-------------|------------|
| 1                                                                                                                                                                                                                                                                                                                                                                                                                                                                                                                                                                                                                                                                                                                                                                                                                                                                                                                                                                                                                                                                                                                                                                                                                                                                                                                                                                                                                                                                                                                                                                                                                                                                                                                                                                                                                                                                                                                                     | 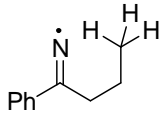   |    |             |             |             |             |   |             |             |             |   |             |             |             |   |             |             |             |   |             |             |             |   |             |             |             |   |             |             |             |   |             |            |             |   |             |            |            |   |             |            |            |   |            |            |             |   |            |             |             |   |            |            |            |   |            |             |            |   |            |             |             |   |            |            |            |   |            |            |            |   |            |             |            |   |            |             |            |   |            |            |            |   |            |             |            |   |             |            |            |   |             |             |            |
| <p>Cartesian Coordinates</p> <table border="0"> <tr><td>C</td><td>-0.78190600</td><td>0.32911300</td><td>-0.38197000</td></tr> <tr><td>N</td><td>-1.22495500</td><td>1.46294100</td><td>-0.71483600</td></tr> <tr><td>C</td><td>-1.73567100</td><td>-0.86336000</td><td>-0.23137700</td></tr> <tr><td>H</td><td>-1.48924400</td><td>-1.56949100</td><td>-1.03548900</td></tr> <tr><td>H</td><td>-1.49289400</td><td>-1.37074500</td><td>0.71163800</td></tr> <tr><td>C</td><td>-3.23390500</td><td>-0.53051700</td><td>-0.28085600</td></tr> <tr><td>H</td><td>-3.77762000</td><td>-1.48062900</td><td>-0.35621900</td></tr> <tr><td>H</td><td>-3.45212800</td><td>0.02826200</td><td>-1.19794700</td></tr> <tr><td>C</td><td>-3.74677200</td><td>0.24831400</td><td>0.93665600</td></tr> <tr><td>H</td><td>-3.26863000</td><td>1.22903800</td><td>1.01369100</td></tr> <tr><td>C</td><td>0.68836000</td><td>0.12202400</td><td>-0.14910500</td></tr> <tr><td>C</td><td>1.25203600</td><td>-1.16286000</td><td>-0.11793600</td></tr> <tr><td>C</td><td>1.52726800</td><td>1.23584300</td><td>0.03524700</td></tr> <tr><td>C</td><td>2.62427800</td><td>-1.33044600</td><td>0.08723800</td></tr> <tr><td>H</td><td>0.62972100</td><td>-2.03991200</td><td>-0.25901900</td></tr> <tr><td>C</td><td>2.89443300</td><td>1.06571800</td><td>0.24208600</td></tr> <tr><td>H</td><td>1.09441400</td><td>2.23079400</td><td>0.02142800</td></tr> <tr><td>C</td><td>3.44900000</td><td>-0.21877700</td><td>0.26819600</td></tr> <tr><td>H</td><td>3.04552400</td><td>-2.33141100</td><td>0.10528300</td></tr> <tr><td>H</td><td>3.52845900</td><td>1.93557600</td><td>0.38725700</td></tr> <tr><td>H</td><td>4.51469400</td><td>-0.35053100</td><td>0.43108500</td></tr> <tr><td>H</td><td>-4.82797200</td><td>0.40821100</td><td>0.86648500</td></tr> <tr><td>H</td><td>-3.55234900</td><td>-0.30005800</td><td>1.86658800</td></tr> </table> |                                                                                     |                                                                                      | C           | -0.78190600 | 0.32911300  | -0.38197000 | N | -1.22495500 | 1.46294100  | -0.71483600 | C | -1.73567100 | -0.86336000 | -0.23137700 | H | -1.48924400 | -1.56949100 | -1.03548900 | H | -1.49289400 | -1.37074500 | 0.71163800  | C | -3.23390500 | -0.53051700 | -0.28085600 | H | -3.77762000 | -1.48062900 | -0.35621900 | H | -3.45212800 | 0.02826200 | -1.19794700 | C | -3.74677200 | 0.24831400 | 0.93665600 | H | -3.26863000 | 1.22903800 | 1.01369100 | C | 0.68836000 | 0.12202400 | -0.14910500 | C | 1.25203600 | -1.16286000 | -0.11793600 | C | 1.52726800 | 1.23584300 | 0.03524700 | C | 2.62427800 | -1.33044600 | 0.08723800 | H | 0.62972100 | -2.03991200 | -0.25901900 | C | 2.89443300 | 1.06571800 | 0.24208600 | H | 1.09441400 | 2.23079400 | 0.02142800 | C | 3.44900000 | -0.21877700 | 0.26819600 | H | 3.04552400 | -2.33141100 | 0.10528300 | H | 3.52845900 | 1.93557600 | 0.38725700 | H | 4.51469400 | -0.35053100 | 0.43108500 | H | -4.82797200 | 0.40821100 | 0.86648500 | H | -3.55234900 | -0.30005800 | 1.86658800 |
| C                                                                                                                                                                                                                                                                                                                                                                                                                                                                                                                                                                                                                                                                                                                                                                                                                                                                                                                                                                                                                                                                                                                                                                                                                                                                                                                                                                                                                                                                                                                                                                                                                                                                                                                                                                                                                                                                                                                                     | -0.78190600                                                                         | 0.32911300                                                                           | -0.38197000 |             |             |             |   |             |             |             |   |             |             |             |   |             |             |             |   |             |             |             |   |             |             |             |   |             |             |             |   |             |            |             |   |             |            |            |   |             |            |            |   |            |            |             |   |            |             |             |   |            |            |            |   |            |             |            |   |            |             |             |   |            |            |            |   |            |            |            |   |            |             |            |   |            |             |            |   |            |            |            |   |            |             |            |   |             |            |            |   |             |             |            |
| N                                                                                                                                                                                                                                                                                                                                                                                                                                                                                                                                                                                                                                                                                                                                                                                                                                                                                                                                                                                                                                                                                                                                                                                                                                                                                                                                                                                                                                                                                                                                                                                                                                                                                                                                                                                                                                                                                                                                     | -1.22495500                                                                         | 1.46294100                                                                           | -0.71483600 |             |             |             |   |             |             |             |   |             |             |             |   |             |             |             |   |             |             |             |   |             |             |             |   |             |             |             |   |             |            |             |   |             |            |            |   |             |            |            |   |            |            |             |   |            |             |             |   |            |            |            |   |            |             |            |   |            |             |             |   |            |            |            |   |            |            |            |   |            |             |            |   |            |             |            |   |            |            |            |   |            |             |            |   |             |            |            |   |             |             |            |
| C                                                                                                                                                                                                                                                                                                                                                                                                                                                                                                                                                                                                                                                                                                                                                                                                                                                                                                                                                                                                                                                                                                                                                                                                                                                                                                                                                                                                                                                                                                                                                                                                                                                                                                                                                                                                                                                                                                                                     | -1.73567100                                                                         | -0.86336000                                                                          | -0.23137700 |             |             |             |   |             |             |             |   |             |             |             |   |             |             |             |   |             |             |             |   |             |             |             |   |             |             |             |   |             |            |             |   |             |            |            |   |             |            |            |   |            |            |             |   |            |             |             |   |            |            |            |   |            |             |            |   |            |             |             |   |            |            |            |   |            |            |            |   |            |             |            |   |            |             |            |   |            |            |            |   |            |             |            |   |             |            |            |   |             |             |            |
| H                                                                                                                                                                                                                                                                                                                                                                                                                                                                                                                                                                                                                                                                                                                                                                                                                                                                                                                                                                                                                                                                                                                                                                                                                                                                                                                                                                                                                                                                                                                                                                                                                                                                                                                                                                                                                                                                                                                                     | -1.48924400                                                                         | -1.56949100                                                                          | -1.03548900 |             |             |             |   |             |             |             |   |             |             |             |   |             |             |             |   |             |             |             |   |             |             |             |   |             |             |             |   |             |            |             |   |             |            |            |   |             |            |            |   |            |            |             |   |            |             |             |   |            |            |            |   |            |             |            |   |            |             |             |   |            |            |            |   |            |            |            |   |            |             |            |   |            |             |            |   |            |            |            |   |            |             |            |   |             |            |            |   |             |             |            |
| H                                                                                                                                                                                                                                                                                                                                                                                                                                                                                                                                                                                                                                                                                                                                                                                                                                                                                                                                                                                                                                                                                                                                                                                                                                                                                                                                                                                                                                                                                                                                                                                                                                                                                                                                                                                                                                                                                                                                     | -1.49289400                                                                         | -1.37074500                                                                          | 0.71163800  |             |             |             |   |             |             |             |   |             |             |             |   |             |             |             |   |             |             |             |   |             |             |             |   |             |             |             |   |             |            |             |   |             |            |            |   |             |            |            |   |            |            |             |   |            |             |             |   |            |            |            |   |            |             |            |   |            |             |             |   |            |            |            |   |            |            |            |   |            |             |            |   |            |             |            |   |            |            |            |   |            |             |            |   |             |            |            |   |             |             |            |
| C                                                                                                                                                                                                                                                                                                                                                                                                                                                                                                                                                                                                                                                                                                                                                                                                                                                                                                                                                                                                                                                                                                                                                                                                                                                                                                                                                                                                                                                                                                                                                                                                                                                                                                                                                                                                                                                                                                                                     | -3.23390500                                                                         | -0.53051700                                                                          | -0.28085600 |             |             |             |   |             |             |             |   |             |             |             |   |             |             |             |   |             |             |             |   |             |             |             |   |             |             |             |   |             |            |             |   |             |            |            |   |             |            |            |   |            |            |             |   |            |             |             |   |            |            |            |   |            |             |            |   |            |             |             |   |            |            |            |   |            |            |            |   |            |             |            |   |            |             |            |   |            |            |            |   |            |             |            |   |             |            |            |   |             |             |            |
| H                                                                                                                                                                                                                                                                                                                                                                                                                                                                                                                                                                                                                                                                                                                                                                                                                                                                                                                                                                                                                                                                                                                                                                                                                                                                                                                                                                                                                                                                                                                                                                                                                                                                                                                                                                                                                                                                                                                                     | -3.77762000                                                                         | -1.48062900                                                                          | -0.35621900 |             |             |             |   |             |             |             |   |             |             |             |   |             |             |             |   |             |             |             |   |             |             |             |   |             |             |             |   |             |            |             |   |             |            |            |   |             |            |            |   |            |            |             |   |            |             |             |   |            |            |            |   |            |             |            |   |            |             |             |   |            |            |            |   |            |            |            |   |            |             |            |   |            |             |            |   |            |            |            |   |            |             |            |   |             |            |            |   |             |             |            |
| H                                                                                                                                                                                                                                                                                                                                                                                                                                                                                                                                                                                                                                                                                                                                                                                                                                                                                                                                                                                                                                                                                                                                                                                                                                                                                                                                                                                                                                                                                                                                                                                                                                                                                                                                                                                                                                                                                                                                     | -3.45212800                                                                         | 0.02826200                                                                           | -1.19794700 |             |             |             |   |             |             |             |   |             |             |             |   |             |             |             |   |             |             |             |   |             |             |             |   |             |             |             |   |             |            |             |   |             |            |            |   |             |            |            |   |            |            |             |   |            |             |             |   |            |            |            |   |            |             |            |   |            |             |             |   |            |            |            |   |            |            |            |   |            |             |            |   |            |             |            |   |            |            |            |   |            |             |            |   |             |            |            |   |             |             |            |
| C                                                                                                                                                                                                                                                                                                                                                                                                                                                                                                                                                                                                                                                                                                                                                                                                                                                                                                                                                                                                                                                                                                                                                                                                                                                                                                                                                                                                                                                                                                                                                                                                                                                                                                                                                                                                                                                                                                                                     | -3.74677200                                                                         | 0.24831400                                                                           | 0.93665600  |             |             |             |   |             |             |             |   |             |             |             |   |             |             |             |   |             |             |             |   |             |             |             |   |             |             |             |   |             |            |             |   |             |            |            |   |             |            |            |   |            |            |             |   |            |             |             |   |            |            |            |   |            |             |            |   |            |             |             |   |            |            |            |   |            |            |            |   |            |             |            |   |            |             |            |   |            |            |            |   |            |             |            |   |             |            |            |   |             |             |            |
| H                                                                                                                                                                                                                                                                                                                                                                                                                                                                                                                                                                                                                                                                                                                                                                                                                                                                                                                                                                                                                                                                                                                                                                                                                                                                                                                                                                                                                                                                                                                                                                                                                                                                                                                                                                                                                                                                                                                                     | -3.26863000                                                                         | 1.22903800                                                                           | 1.01369100  |             |             |             |   |             |             |             |   |             |             |             |   |             |             |             |   |             |             |             |   |             |             |             |   |             |             |             |   |             |            |             |   |             |            |            |   |             |            |            |   |            |            |             |   |            |             |             |   |            |            |            |   |            |             |            |   |            |             |             |   |            |            |            |   |            |            |            |   |            |             |            |   |            |             |            |   |            |            |            |   |            |             |            |   |             |            |            |   |             |             |            |
| C                                                                                                                                                                                                                                                                                                                                                                                                                                                                                                                                                                                                                                                                                                                                                                                                                                                                                                                                                                                                                                                                                                                                                                                                                                                                                                                                                                                                                                                                                                                                                                                                                                                                                                                                                                                                                                                                                                                                     | 0.68836000                                                                          | 0.12202400                                                                           | -0.14910500 |             |             |             |   |             |             |             |   |             |             |             |   |             |             |             |   |             |             |             |   |             |             |             |   |             |             |             |   |             |            |             |   |             |            |            |   |             |            |            |   |            |            |             |   |            |             |             |   |            |            |            |   |            |             |            |   |            |             |             |   |            |            |            |   |            |            |            |   |            |             |            |   |            |             |            |   |            |            |            |   |            |             |            |   |             |            |            |   |             |             |            |
| C                                                                                                                                                                                                                                                                                                                                                                                                                                                                                                                                                                                                                                                                                                                                                                                                                                                                                                                                                                                                                                                                                                                                                                                                                                                                                                                                                                                                                                                                                                                                                                                                                                                                                                                                                                                                                                                                                                                                     | 1.25203600                                                                          | -1.16286000                                                                          | -0.11793600 |             |             |             |   |             |             |             |   |             |             |             |   |             |             |             |   |             |             |             |   |             |             |             |   |             |             |             |   |             |            |             |   |             |            |            |   |             |            |            |   |            |            |             |   |            |             |             |   |            |            |            |   |            |             |            |   |            |             |             |   |            |            |            |   |            |            |            |   |            |             |            |   |            |             |            |   |            |            |            |   |            |             |            |   |             |            |            |   |             |             |            |
| C                                                                                                                                                                                                                                                                                                                                                                                                                                                                                                                                                                                                                                                                                                                                                                                                                                                                                                                                                                                                                                                                                                                                                                                                                                                                                                                                                                                                                                                                                                                                                                                                                                                                                                                                                                                                                                                                                                                                     | 1.52726800                                                                          | 1.23584300                                                                           | 0.03524700  |             |             |             |   |             |             |             |   |             |             |             |   |             |             |             |   |             |             |             |   |             |             |             |   |             |             |             |   |             |            |             |   |             |            |            |   |             |            |            |   |            |            |             |   |            |             |             |   |            |            |            |   |            |             |            |   |            |             |             |   |            |            |            |   |            |            |            |   |            |             |            |   |            |             |            |   |            |            |            |   |            |             |            |   |             |            |            |   |             |             |            |
| C                                                                                                                                                                                                                                                                                                                                                                                                                                                                                                                                                                                                                                                                                                                                                                                                                                                                                                                                                                                                                                                                                                                                                                                                                                                                                                                                                                                                                                                                                                                                                                                                                                                                                                                                                                                                                                                                                                                                     | 2.62427800                                                                          | -1.33044600                                                                          | 0.08723800  |             |             |             |   |             |             |             |   |             |             |             |   |             |             |             |   |             |             |             |   |             |             |             |   |             |             |             |   |             |            |             |   |             |            |            |   |             |            |            |   |            |            |             |   |            |             |             |   |            |            |            |   |            |             |            |   |            |             |             |   |            |            |            |   |            |            |            |   |            |             |            |   |            |             |            |   |            |            |            |   |            |             |            |   |             |            |            |   |             |             |            |
| H                                                                                                                                                                                                                                                                                                                                                                                                                                                                                                                                                                                                                                                                                                                                                                                                                                                                                                                                                                                                                                                                                                                                                                                                                                                                                                                                                                                                                                                                                                                                                                                                                                                                                                                                                                                                                                                                                                                                     | 0.62972100                                                                          | -2.03991200                                                                          | -0.25901900 |             |             |             |   |             |             |             |   |             |             |             |   |             |             |             |   |             |             |             |   |             |             |             |   |             |             |             |   |             |            |             |   |             |            |            |   |             |            |            |   |            |            |             |   |            |             |             |   |            |            |            |   |            |             |            |   |            |             |             |   |            |            |            |   |            |            |            |   |            |             |            |   |            |             |            |   |            |            |            |   |            |             |            |   |             |            |            |   |             |             |            |
| C                                                                                                                                                                                                                                                                                                                                                                                                                                                                                                                                                                                                                                                                                                                                                                                                                                                                                                                                                                                                                                                                                                                                                                                                                                                                                                                                                                                                                                                                                                                                                                                                                                                                                                                                                                                                                                                                                                                                     | 2.89443300                                                                          | 1.06571800                                                                           | 0.24208600  |             |             |             |   |             |             |             |   |             |             |             |   |             |             |             |   |             |             |             |   |             |             |             |   |             |             |             |   |             |            |             |   |             |            |            |   |             |            |            |   |            |            |             |   |            |             |             |   |            |            |            |   |            |             |            |   |            |             |             |   |            |            |            |   |            |            |            |   |            |             |            |   |            |             |            |   |            |            |            |   |            |             |            |   |             |            |            |   |             |             |            |
| H                                                                                                                                                                                                                                                                                                                                                                                                                                                                                                                                                                                                                                                                                                                                                                                                                                                                                                                                                                                                                                                                                                                                                                                                                                                                                                                                                                                                                                                                                                                                                                                                                                                                                                                                                                                                                                                                                                                                     | 1.09441400                                                                          | 2.23079400                                                                           | 0.02142800  |             |             |             |   |             |             |             |   |             |             |             |   |             |             |             |   |             |             |             |   |             |             |             |   |             |             |             |   |             |            |             |   |             |            |            |   |             |            |            |   |            |            |             |   |            |             |             |   |            |            |            |   |            |             |            |   |            |             |             |   |            |            |            |   |            |            |            |   |            |             |            |   |            |             |            |   |            |            |            |   |            |             |            |   |             |            |            |   |             |             |            |
| C                                                                                                                                                                                                                                                                                                                                                                                                                                                                                                                                                                                                                                                                                                                                                                                                                                                                                                                                                                                                                                                                                                                                                                                                                                                                                                                                                                                                                                                                                                                                                                                                                                                                                                                                                                                                                                                                                                                                     | 3.44900000                                                                          | -0.21877700                                                                          | 0.26819600  |             |             |             |   |             |             |             |   |             |             |             |   |             |             |             |   |             |             |             |   |             |             |             |   |             |             |             |   |             |            |             |   |             |            |            |   |             |            |            |   |            |            |             |   |            |             |             |   |            |            |            |   |            |             |            |   |            |             |             |   |            |            |            |   |            |            |            |   |            |             |            |   |            |             |            |   |            |            |            |   |            |             |            |   |             |            |            |   |             |             |            |
| H                                                                                                                                                                                                                                                                                                                                                                                                                                                                                                                                                                                                                                                                                                                                                                                                                                                                                                                                                                                                                                                                                                                                                                                                                                                                                                                                                                                                                                                                                                                                                                                                                                                                                                                                                                                                                                                                                                                                     | 3.04552400                                                                          | -2.33141100                                                                          | 0.10528300  |             |             |             |   |             |             |             |   |             |             |             |   |             |             |             |   |             |             |             |   |             |             |             |   |             |             |             |   |             |            |             |   |             |            |            |   |             |            |            |   |            |            |             |   |            |             |             |   |            |            |            |   |            |             |            |   |            |             |             |   |            |            |            |   |            |            |            |   |            |             |            |   |            |             |            |   |            |            |            |   |            |             |            |   |             |            |            |   |             |             |            |
| H                                                                                                                                                                                                                                                                                                                                                                                                                                                                                                                                                                                                                                                                                                                                                                                                                                                                                                                                                                                                                                                                                                                                                                                                                                                                                                                                                                                                                                                                                                                                                                                                                                                                                                                                                                                                                                                                                                                                     | 3.52845900                                                                          | 1.93557600                                                                           | 0.38725700  |             |             |             |   |             |             |             |   |             |             |             |   |             |             |             |   |             |             |             |   |             |             |             |   |             |             |             |   |             |            |             |   |             |            |            |   |             |            |            |   |            |            |             |   |            |             |             |   |            |            |            |   |            |             |            |   |            |             |             |   |            |            |            |   |            |            |            |   |            |             |            |   |            |             |            |   |            |            |            |   |            |             |            |   |             |            |            |   |             |             |            |
| H                                                                                                                                                                                                                                                                                                                                                                                                                                                                                                                                                                                                                                                                                                                                                                                                                                                                                                                                                                                                                                                                                                                                                                                                                                                                                                                                                                                                                                                                                                                                                                                                                                                                                                                                                                                                                                                                                                                                     | 4.51469400                                                                          | -0.35053100                                                                          | 0.43108500  |             |             |             |   |             |             |             |   |             |             |             |   |             |             |             |   |             |             |             |   |             |             |             |   |             |             |             |   |             |            |             |   |             |            |            |   |             |            |            |   |            |            |             |   |            |             |             |   |            |            |            |   |            |             |            |   |            |             |             |   |            |            |            |   |            |            |            |   |            |             |            |   |            |             |            |   |            |            |            |   |            |             |            |   |             |            |            |   |             |             |            |
| H                                                                                                                                                                                                                                                                                                                                                                                                                                                                                                                                                                                                                                                                                                                                                                                                                                                                                                                                                                                                                                                                                                                                                                                                                                                                                                                                                                                                                                                                                                                                                                                                                                                                                                                                                                                                                                                                                                                                     | -4.82797200                                                                         | 0.40821100                                                                           | 0.86648500  |             |             |             |   |             |             |             |   |             |             |             |   |             |             |             |   |             |             |             |   |             |             |             |   |             |             |             |   |             |            |             |   |             |            |            |   |             |            |            |   |            |            |             |   |            |             |             |   |            |            |            |   |            |             |            |   |            |             |             |   |            |            |            |   |            |            |            |   |            |             |            |   |            |             |            |   |            |            |            |   |            |             |            |   |             |            |            |   |             |             |            |
| H                                                                                                                                                                                                                                                                                                                                                                                                                                                                                                                                                                                                                                                                                                                                                                                                                                                                                                                                                                                                                                                                                                                                                                                                                                                                                                                                                                                                                                                                                                                                                                                                                                                                                                                                                                                                                                                                                                                                     | -3.55234900                                                                         | -0.30005800                                                                          | 1.86658800  |             |             |             |   |             |             |             |   |             |             |             |   |             |             |             |   |             |             |             |   |             |             |             |   |             |             |             |   |             |            |             |   |             |            |            |   |             |            |            |   |            |            |             |   |            |             |             |   |            |            |            |   |            |             |            |   |            |             |             |   |            |            |            |   |            |            |            |   |            |             |            |   |            |             |            |   |            |            |            |   |            |             |            |   |             |            |            |   |             |             |            |
| 2                                                                                                                                                                                                                                                                                                                                                                                                                                                                                                                                                                                                                                                                                                                                                                                                                                                                                                                                                                                                                                                                                                                                                                                                                                                                                                                                                                                                                                                                                                                                                                                                                                                                                                                                                                                                                                                                                                                                     |  |  |             |             |             |             |   |             |             |             |   |             |             |             |   |             |             |             |   |             |             |             |   |             |             |             |   |             |             |             |   |             |            |             |   |             |            |            |   |             |            |            |   |            |            |             |   |            |             |             |   |            |            |            |   |            |             |            |   |            |             |             |   |            |            |            |   |            |            |            |   |            |             |            |   |            |             |            |   |            |            |            |   |            |             |            |   |             |            |            |   |             |             |            |
| <p>Cartesian Coordinates</p> <table border="0"> <tr><td>C</td><td>-0.84535600</td><td>-0.22957000</td><td>-0.10754400</td></tr> <tr><td>N</td><td>-1.34984100</td><td>-1.38635900</td><td>-0.29877100</td></tr> <tr><td>C</td><td>-1.71374600</td><td>1.03016600</td><td>0.02814700</td></tr> <tr><td>H</td><td>-1.23234400</td><td>1.74881600</td><td>0.69816600</td></tr> <tr><td>H</td><td>-1.76952000</td><td>1.51037300</td><td>-0.95973900</td></tr> </table>                                                                                                                                                                                                                                                                                                                                                                                                                                                                                                                                                                                                                                                                                                                                                                                                                                                                                                                                                                                                                                                                                                                                                                                                                                                                                                                                                                                                                                                                   |                                                                                     |                                                                                      | C           | -0.84535600 | -0.22957000 | -0.10754400 | N | -1.34984100 | -1.38635900 | -0.29877100 | C | -1.71374600 | 1.03016600  | 0.02814700  | H | -1.23234400 | 1.74881600  | 0.69816600  | H | -1.76952000 | 1.51037300  | -0.95973900 |   |             |             |             |   |             |             |             |   |             |            |             |   |             |            |            |   |             |            |            |   |            |            |             |   |            |             |             |   |            |            |            |   |            |             |            |   |            |             |             |   |            |            |            |   |            |            |            |   |            |             |            |   |            |             |            |   |            |            |            |   |            |             |            |   |             |            |            |   |             |             |            |
| C                                                                                                                                                                                                                                                                                                                                                                                                                                                                                                                                                                                                                                                                                                                                                                                                                                                                                                                                                                                                                                                                                                                                                                                                                                                                                                                                                                                                                                                                                                                                                                                                                                                                                                                                                                                                                                                                                                                                     | -0.84535600                                                                         | -0.22957000                                                                          | -0.10754400 |             |             |             |   |             |             |             |   |             |             |             |   |             |             |             |   |             |             |             |   |             |             |             |   |             |             |             |   |             |            |             |   |             |            |            |   |             |            |            |   |            |            |             |   |            |             |             |   |            |            |            |   |            |             |            |   |            |             |             |   |            |            |            |   |            |            |            |   |            |             |            |   |            |             |            |   |            |            |            |   |            |             |            |   |             |            |            |   |             |             |            |
| N                                                                                                                                                                                                                                                                                                                                                                                                                                                                                                                                                                                                                                                                                                                                                                                                                                                                                                                                                                                                                                                                                                                                                                                                                                                                                                                                                                                                                                                                                                                                                                                                                                                                                                                                                                                                                                                                                                                                     | -1.34984100                                                                         | -1.38635900                                                                          | -0.29877100 |             |             |             |   |             |             |             |   |             |             |             |   |             |             |             |   |             |             |             |   |             |             |             |   |             |             |             |   |             |            |             |   |             |            |            |   |             |            |            |   |            |            |             |   |            |             |             |   |            |            |            |   |            |             |            |   |            |             |             |   |            |            |            |   |            |            |            |   |            |             |            |   |            |             |            |   |            |            |            |   |            |             |            |   |             |            |            |   |             |             |            |
| C                                                                                                                                                                                                                                                                                                                                                                                                                                                                                                                                                                                                                                                                                                                                                                                                                                                                                                                                                                                                                                                                                                                                                                                                                                                                                                                                                                                                                                                                                                                                                                                                                                                                                                                                                                                                                                                                                                                                     | -1.71374600                                                                         | 1.03016600                                                                           | 0.02814700  |             |             |             |   |             |             |             |   |             |             |             |   |             |             |             |   |             |             |             |   |             |             |             |   |             |             |             |   |             |            |             |   |             |            |            |   |             |            |            |   |            |            |             |   |            |             |             |   |            |            |            |   |            |             |            |   |            |             |             |   |            |            |            |   |            |            |            |   |            |             |            |   |            |             |            |   |            |            |            |   |            |             |            |   |             |            |            |   |             |             |            |
| H                                                                                                                                                                                                                                                                                                                                                                                                                                                                                                                                                                                                                                                                                                                                                                                                                                                                                                                                                                                                                                                                                                                                                                                                                                                                                                                                                                                                                                                                                                                                                                                                                                                                                                                                                                                                                                                                                                                                     | -1.23234400                                                                         | 1.74881600                                                                           | 0.69816600  |             |             |             |   |             |             |             |   |             |             |             |   |             |             |             |   |             |             |             |   |             |             |             |   |             |             |             |   |             |            |             |   |             |            |            |   |             |            |            |   |            |            |             |   |            |             |             |   |            |            |            |   |            |             |            |   |            |             |             |   |            |            |            |   |            |            |            |   |            |             |            |   |            |             |            |   |            |            |            |   |            |             |            |   |             |            |            |   |             |             |            |
| H                                                                                                                                                                                                                                                                                                                                                                                                                                                                                                                                                                                                                                                                                                                                                                                                                                                                                                                                                                                                                                                                                                                                                                                                                                                                                                                                                                                                                                                                                                                                                                                                                                                                                                                                                                                                                                                                                                                                     | -1.76952000                                                                         | 1.51037300                                                                           | -0.95973900 |             |             |             |   |             |             |             |   |             |             |             |   |             |             |             |   |             |             |             |   |             |             |             |   |             |             |             |   |             |            |             |   |             |            |            |   |             |            |            |   |            |            |             |   |            |             |             |   |            |            |            |   |            |             |            |   |            |             |             |   |            |            |            |   |            |            |            |   |            |             |            |   |            |             |            |   |            |            |            |   |            |             |            |   |             |            |            |   |             |             |            |

| No.                   | Species                                                                            | Optimized Structure                                                                 |  |  |
|-----------------------|------------------------------------------------------------------------------------|-------------------------------------------------------------------------------------|--|--|
| C                     | -3.12447900 0.68800600 0.53497600                                                  |                                                                                     |  |  |
| H                     | -3.75441700 1.58820100 0.46815400                                                  |                                                                                     |  |  |
| H                     | -3.06527200 0.42613600 1.59855500                                                  |                                                                                     |  |  |
| C                     | -3.71758200 -0.46824100 -0.23738400                                                |                                                                                     |  |  |
| H                     | -2.56771700 -1.24223200 -0.31011100                                                |                                                                                     |  |  |
| C                     | 0.64591400 -0.08794800 -0.04138000                                                 |                                                                                     |  |  |
| C                     | 1.27667200 1.15726700 -0.19440700                                                  |                                                                                     |  |  |
| C                     | 1.44438100 -1.22851600 0.15885500                                                  |                                                                                     |  |  |
| C                     | 2.66988200 1.26022000 -0.15300900                                                  |                                                                                     |  |  |
| H                     | 0.68898100 2.05398700 -0.36087400                                                  |                                                                                     |  |  |
| C                     | 2.83232200 -1.12304800 0.21064900                                                  |                                                                                     |  |  |
| H                     | 0.95655400 -2.19038500 0.27467700                                                  |                                                                                     |  |  |
| C                     | 3.45164600 0.12232800 0.05335600                                                   |                                                                                     |  |  |
| H                     | 3.14107400 2.23052600 -0.28100200                                                  |                                                                                     |  |  |
| H                     | 3.43387300 -2.01267200 0.37413800                                                  |                                                                                     |  |  |
| H                     | 4.53413300 0.20337500 0.09235600                                                   |                                                                                     |  |  |
| H                     | -4.47719800 -1.06489100 0.26854800                                                 |                                                                                     |  |  |
| H                     | -3.95718700 -0.27069700 -1.28503100                                                |                                                                                     |  |  |
| 3                     | 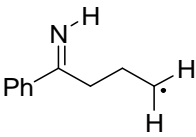 |  |  |  |
| Cartesian Coordinates |                                                                                    |                                                                                     |  |  |
| C                     | -0.81147300 0.36985200 -0.11467500                                                 |                                                                                     |  |  |
| N                     | -1.22181800 1.58367500 -0.10159600                                                 |                                                                                     |  |  |
| C                     | -1.71984600 -0.85501900 -0.20172000                                                |                                                                                     |  |  |
| H                     | -1.34575700 -1.50202700 -1.00456500                                                |                                                                                     |  |  |
| H                     | -1.60698800 -1.43652700 0.72434100                                                 |                                                                                     |  |  |
| C                     | -3.21081000 -0.57514100 -0.44507600                                                |                                                                                     |  |  |
| H                     | -3.69191900 -1.54949700 -0.64821000                                                |                                                                                     |  |  |
| H                     | -3.33861700 -0.00480800 -1.37662400                                                |                                                                                     |  |  |
| C                     | -3.91964800 0.10439700 0.67992000                                                  |                                                                                     |  |  |
| C                     | 0.66635300 0.12671000 -0.04225300                                                  |                                                                                     |  |  |
| C                     | 1.21121400 -1.16461300 0.05566400                                                  |                                                                                     |  |  |
| C                     | 1.54760400 1.22358400 -0.06536400                                                  |                                                                                     |  |  |
| C                     | 2.59400900 -1.35558700 0.13037100                                                  |                                                                                     |  |  |
| H                     | 0.56574100 -2.03572800 0.08132800                                                  |                                                                                     |  |  |
| C                     | 2.92526100 1.03323000 0.00482100                                                   |                                                                                     |  |  |
| H                     | 1.12533900 2.21954600 -0.13815800                                                  |                                                                                     |  |  |
| C                     | 3.45593900 -0.25849300 0.10357500                                                  |                                                                                     |  |  |
| H                     | 2.99366400 -2.36259600 0.20905300                                                  |                                                                                     |  |  |

| No.                   | Species                                                                           | Optimized Structure                                                                |  |  |
|-----------------------|-----------------------------------------------------------------------------------|------------------------------------------------------------------------------------|--|--|
| H                     | 3.58903200 1.89301200 -0.01705100                                                 |                                                                                    |  |  |
| H                     | 4.53072500 -0.40622500 0.15897300                                                 |                                                                                    |  |  |
| H                     | -4.87716400 0.58945600 0.51901700                                                 |                                                                                    |  |  |
| H                     | -3.58018100 -0.01700400 1.70446500                                                |                                                                                    |  |  |
| H                     | -2.24276000 1.63316100 -0.13296600                                                |                                                                                    |  |  |
| 4                     | 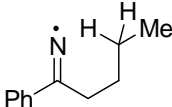 |  |  |  |
| Cartesian Coordinates |                                                                                   |                                                                                    |  |  |
| C                     | 0.26460400 -0.24322400 -0.48604400                                                |                                                                                    |  |  |
| N                     | 0.72734400 -1.33799600 -0.91013600                                                |                                                                                    |  |  |
| C                     | 1.18283300 0.97216300 -0.30194000                                                 |                                                                                    |  |  |
| H                     | 0.86949000 1.72033200 -1.04211300                                                 |                                                                                    |  |  |
| H                     | 0.97053300 1.40622800 0.68406200                                                  |                                                                                    |  |  |
| C                     | 2.68699400 0.70357800 -0.45047000                                                 |                                                                                    |  |  |
| H                     | 3.19318600 1.67760600 -0.48980900                                                 |                                                                                    |  |  |
| H                     | 2.87746900 0.21402500 -1.41329700                                                 |                                                                                    |  |  |
| C                     | 3.30276600 -0.13090500 0.68182800                                                 |                                                                                    |  |  |
| H                     | 2.81662400 -1.11231400 0.71703600                                                 |                                                                                    |  |  |
| C                     | -1.19879100 -0.10454500 -0.17308000                                               |                                                                                    |  |  |
| C                     | -1.81067900 1.15461200 -0.07418700                                                |                                                                                    |  |  |
| C                     | -1.98190000 -1.25701400 0.01815100                                                |                                                                                    |  |  |
| C                     | -3.17635000 1.25926300 0.20322400                                                 |                                                                                    |  |  |
| H                     | -1.23152300 2.06020200 -0.21886800                                                |                                                                                    |  |  |
| C                     | -3.34272700 -1.14955800 0.29744600                                                |                                                                                    |  |  |
| H                     | -1.51065700 -2.23226100 -0.04766800                                               |                                                                                    |  |  |
| C                     | -3.94592000 0.10955600 0.39019800                                                 |                                                                                    |  |  |
| H                     | -3.63584700 2.24094700 0.27305900                                                 |                                                                                    |  |  |
| H                     | -3.93339100 -2.04867200 0.44716100                                                |                                                                                    |  |  |
| H                     | -5.00637000 0.19239900 0.60969500                                                 |                                                                                    |  |  |
| H                     | 3.09379700 0.35843100 1.64388800                                                  |                                                                                    |  |  |
| C                     | 4.81609300 -0.31650000 0.52270200                                                 |                                                                                    |  |  |
| H                     | 5.33803200 0.64817500 0.51324600                                                  |                                                                                    |  |  |
| H                     | 5.23198000 -0.91162700 1.34275100                                                 |                                                                                    |  |  |
| H                     | 5.05371800 -0.83205400 -0.41516500                                                |                                                                                    |  |  |

| No.                                                                                                                                                                                                                                                                                                                                                                                                                                                                                                                                                                                                                                                                                                                                                                                                                                                                                                                                                                                                                                                                                                                                                                                                                                                                                                                                                                                                                                                                                                                                                                                                                                                                                                                                                                                                                                                                                                                                                                                                                                                                                                                                                                                                    | Species     | Optimized Structure |             |             |             |             |   |             |             |             |   |             |             |             |   |             |            |            |   |             |            |             |   |             |            |            |   |             |            |            |   |             |            |            |   |             |             |             |   |             |             |             |   |            |             |             |   |            |            |             |   |            |             |            |   |            |            |             |   |            |            |             |   |            |             |            |   |            |             |            |   |            |             |            |   |            |            |             |   |            |             |            |   |            |             |            |   |             |            |             |   |             |             |            |   |             |             |            |   |             |             |            |   |             |             |             |
|--------------------------------------------------------------------------------------------------------------------------------------------------------------------------------------------------------------------------------------------------------------------------------------------------------------------------------------------------------------------------------------------------------------------------------------------------------------------------------------------------------------------------------------------------------------------------------------------------------------------------------------------------------------------------------------------------------------------------------------------------------------------------------------------------------------------------------------------------------------------------------------------------------------------------------------------------------------------------------------------------------------------------------------------------------------------------------------------------------------------------------------------------------------------------------------------------------------------------------------------------------------------------------------------------------------------------------------------------------------------------------------------------------------------------------------------------------------------------------------------------------------------------------------------------------------------------------------------------------------------------------------------------------------------------------------------------------------------------------------------------------------------------------------------------------------------------------------------------------------------------------------------------------------------------------------------------------------------------------------------------------------------------------------------------------------------------------------------------------------------------------------------------------------------------------------------------------|-------------|---------------------|-------------|-------------|-------------|-------------|---|-------------|-------------|-------------|---|-------------|-------------|-------------|---|-------------|------------|------------|---|-------------|------------|-------------|---|-------------|------------|------------|---|-------------|------------|------------|---|-------------|------------|------------|---|-------------|-------------|-------------|---|-------------|-------------|-------------|---|------------|-------------|-------------|---|------------|------------|-------------|---|------------|-------------|------------|---|------------|------------|-------------|---|------------|------------|-------------|---|------------|-------------|------------|---|------------|-------------|------------|---|------------|-------------|------------|---|------------|------------|-------------|---|------------|-------------|------------|---|------------|-------------|------------|---|-------------|------------|-------------|---|-------------|-------------|------------|---|-------------|-------------|------------|---|-------------|-------------|------------|---|-------------|-------------|-------------|
| 5                                                                                                                                                                                                                                                                                                                                                                                                                                                                                                                                                                                                                                                                                                                                                                                                                                                                                                                                                                                                                                                                                                                                                                                                                                                                                                                                                                                                                                                                                                                                                                                                                                                                                                                                                                                                                                                                                                                                                                                                                                                                                                                                                                                                      |             |                     |             |             |             |             |   |             |             |             |   |             |             |             |   |             |            |            |   |             |            |             |   |             |            |            |   |             |            |            |   |             |            |            |   |             |             |             |   |             |             |             |   |            |             |             |   |            |            |             |   |            |             |            |   |            |            |             |   |            |            |             |   |            |             |            |   |            |             |            |   |            |             |            |   |            |            |             |   |            |             |            |   |            |             |            |   |             |            |             |   |             |             |            |   |             |             |            |   |             |             |            |   |             |             |             |
| <p>Cartesian Coordinates</p> <table border="1"> <tbody> <tr><td>C</td><td>-0.38902900</td><td>-0.06883400</td><td>-0.16040200</td></tr> <tr><td>N</td><td>-0.98778400</td><td>-1.17168900</td><td>-0.39272400</td></tr> <tr><td>C</td><td>-1.14998100</td><td>1.25820100</td><td>-0.01341300</td></tr> <tr><td>H</td><td>-0.63018400</td><td>1.91278700</td><td>0.69264600</td></tr> <tr><td>H</td><td>-1.13081600</td><td>1.77004800</td><td>-0.98660900</td></tr> <tr><td>C</td><td>-2.59921900</td><td>1.02810700</td><td>0.44178700</td></tr> <tr><td>H</td><td>-3.15122400</td><td>1.97971900</td><td>0.38731100</td></tr> <tr><td>H</td><td>-2.59679200</td><td>0.72954500</td><td>1.49883500</td></tr> <tr><td>C</td><td>-3.27486800</td><td>-0.05324300</td><td>-0.37746500</td></tr> <tr><td>H</td><td>-2.20565100</td><td>-0.89848500</td><td>-0.43564700</td></tr> <tr><td>C</td><td>1.10729600</td><td>-0.05746000</td><td>-0.05580000</td></tr> <tr><td>C</td><td>1.84587400</td><td>1.13390500</td><td>-0.13948200</td></tr> <tr><td>C</td><td>1.80111700</td><td>-1.26977700</td><td>0.11023600</td></tr> <tr><td>C</td><td>3.24143500</td><td>1.11482900</td><td>-0.06284200</td></tr> <tr><td>H</td><td>1.34167200</td><td>2.08437400</td><td>-0.27888600</td></tr> <tr><td>C</td><td>3.19120500</td><td>-1.28665800</td><td>0.19664100</td></tr> <tr><td>H</td><td>1.23025700</td><td>-2.19009800</td><td>0.17166300</td></tr> <tr><td>C</td><td>3.91827900</td><td>-0.09368900</td><td>0.10910000</td></tr> <tr><td>H</td><td>3.79636100</td><td>2.04570700</td><td>-0.13701700</td></tr> <tr><td>H</td><td>3.71049900</td><td>-2.23106800</td><td>0.33275200</td></tr> <tr><td>H</td><td>5.00242000</td><td>-0.10787900</td><td>0.17494300</td></tr> <tr><td>H</td><td>-3.40259300</td><td>0.21724300</td><td>-1.43195000</td></tr> <tr><td>C</td><td>-4.47136500</td><td>-0.75545500</td><td>0.22114500</td></tr> <tr><td>H</td><td>-4.23706100</td><td>-1.17124800</td><td>1.20829000</td></tr> <tr><td>H</td><td>-5.31877400</td><td>-0.06379400</td><td>0.35313600</td></tr> <tr><td>H</td><td>-4.81809100</td><td>-1.57458700</td><td>-0.41743400</td></tr> </tbody> </table> |             |                     | C           | -0.38902900 | -0.06883400 | -0.16040200 | N | -0.98778400 | -1.17168900 | -0.39272400 | C | -1.14998100 | 1.25820100  | -0.01341300 | H | -0.63018400 | 1.91278700 | 0.69264600 | H | -1.13081600 | 1.77004800 | -0.98660900 | C | -2.59921900 | 1.02810700 | 0.44178700 | H | -3.15122400 | 1.97971900 | 0.38731100 | H | -2.59679200 | 0.72954500 | 1.49883500 | C | -3.27486800 | -0.05324300 | -0.37746500 | H | -2.20565100 | -0.89848500 | -0.43564700 | C | 1.10729600 | -0.05746000 | -0.05580000 | C | 1.84587400 | 1.13390500 | -0.13948200 | C | 1.80111700 | -1.26977700 | 0.11023600 | C | 3.24143500 | 1.11482900 | -0.06284200 | H | 1.34167200 | 2.08437400 | -0.27888600 | C | 3.19120500 | -1.28665800 | 0.19664100 | H | 1.23025700 | -2.19009800 | 0.17166300 | C | 3.91827900 | -0.09368900 | 0.10910000 | H | 3.79636100 | 2.04570700 | -0.13701700 | H | 3.71049900 | -2.23106800 | 0.33275200 | H | 5.00242000 | -0.10787900 | 0.17494300 | H | -3.40259300 | 0.21724300 | -1.43195000 | C | -4.47136500 | -0.75545500 | 0.22114500 | H | -4.23706100 | -1.17124800 | 1.20829000 | H | -5.31877400 | -0.06379400 | 0.35313600 | H | -4.81809100 | -1.57458700 | -0.41743400 |
| C                                                                                                                                                                                                                                                                                                                                                                                                                                                                                                                                                                                                                                                                                                                                                                                                                                                                                                                                                                                                                                                                                                                                                                                                                                                                                                                                                                                                                                                                                                                                                                                                                                                                                                                                                                                                                                                                                                                                                                                                                                                                                                                                                                                                      | -0.38902900 | -0.06883400         | -0.16040200 |             |             |             |   |             |             |             |   |             |             |             |   |             |            |            |   |             |            |             |   |             |            |            |   |             |            |            |   |             |            |            |   |             |             |             |   |             |             |             |   |            |             |             |   |            |            |             |   |            |             |            |   |            |            |             |   |            |            |             |   |            |             |            |   |            |             |            |   |            |             |            |   |            |            |             |   |            |             |            |   |            |             |            |   |             |            |             |   |             |             |            |   |             |             |            |   |             |             |            |   |             |             |             |
| N                                                                                                                                                                                                                                                                                                                                                                                                                                                                                                                                                                                                                                                                                                                                                                                                                                                                                                                                                                                                                                                                                                                                                                                                                                                                                                                                                                                                                                                                                                                                                                                                                                                                                                                                                                                                                                                                                                                                                                                                                                                                                                                                                                                                      | -0.98778400 | -1.17168900         | -0.39272400 |             |             |             |   |             |             |             |   |             |             |             |   |             |            |            |   |             |            |             |   |             |            |            |   |             |            |            |   |             |            |            |   |             |             |             |   |             |             |             |   |            |             |             |   |            |            |             |   |            |             |            |   |            |            |             |   |            |            |             |   |            |             |            |   |            |             |            |   |            |             |            |   |            |            |             |   |            |             |            |   |            |             |            |   |             |            |             |   |             |             |            |   |             |             |            |   |             |             |            |   |             |             |             |
| C                                                                                                                                                                                                                                                                                                                                                                                                                                                                                                                                                                                                                                                                                                                                                                                                                                                                                                                                                                                                                                                                                                                                                                                                                                                                                                                                                                                                                                                                                                                                                                                                                                                                                                                                                                                                                                                                                                                                                                                                                                                                                                                                                                                                      | -1.14998100 | 1.25820100          | -0.01341300 |             |             |             |   |             |             |             |   |             |             |             |   |             |            |            |   |             |            |             |   |             |            |            |   |             |            |            |   |             |            |            |   |             |             |             |   |             |             |             |   |            |             |             |   |            |            |             |   |            |             |            |   |            |            |             |   |            |            |             |   |            |             |            |   |            |             |            |   |            |             |            |   |            |            |             |   |            |             |            |   |            |             |            |   |             |            |             |   |             |             |            |   |             |             |            |   |             |             |            |   |             |             |             |
| H                                                                                                                                                                                                                                                                                                                                                                                                                                                                                                                                                                                                                                                                                                                                                                                                                                                                                                                                                                                                                                                                                                                                                                                                                                                                                                                                                                                                                                                                                                                                                                                                                                                                                                                                                                                                                                                                                                                                                                                                                                                                                                                                                                                                      | -0.63018400 | 1.91278700          | 0.69264600  |             |             |             |   |             |             |             |   |             |             |             |   |             |            |            |   |             |            |             |   |             |            |            |   |             |            |            |   |             |            |            |   |             |             |             |   |             |             |             |   |            |             |             |   |            |            |             |   |            |             |            |   |            |            |             |   |            |            |             |   |            |             |            |   |            |             |            |   |            |             |            |   |            |            |             |   |            |             |            |   |            |             |            |   |             |            |             |   |             |             |            |   |             |             |            |   |             |             |            |   |             |             |             |
| H                                                                                                                                                                                                                                                                                                                                                                                                                                                                                                                                                                                                                                                                                                                                                                                                                                                                                                                                                                                                                                                                                                                                                                                                                                                                                                                                                                                                                                                                                                                                                                                                                                                                                                                                                                                                                                                                                                                                                                                                                                                                                                                                                                                                      | -1.13081600 | 1.77004800          | -0.98660900 |             |             |             |   |             |             |             |   |             |             |             |   |             |            |            |   |             |            |             |   |             |            |            |   |             |            |            |   |             |            |            |   |             |             |             |   |             |             |             |   |            |             |             |   |            |            |             |   |            |             |            |   |            |            |             |   |            |            |             |   |            |             |            |   |            |             |            |   |            |             |            |   |            |            |             |   |            |             |            |   |            |             |            |   |             |            |             |   |             |             |            |   |             |             |            |   |             |             |            |   |             |             |             |
| C                                                                                                                                                                                                                                                                                                                                                                                                                                                                                                                                                                                                                                                                                                                                                                                                                                                                                                                                                                                                                                                                                                                                                                                                                                                                                                                                                                                                                                                                                                                                                                                                                                                                                                                                                                                                                                                                                                                                                                                                                                                                                                                                                                                                      | -2.59921900 | 1.02810700          | 0.44178700  |             |             |             |   |             |             |             |   |             |             |             |   |             |            |            |   |             |            |             |   |             |            |            |   |             |            |            |   |             |            |            |   |             |             |             |   |             |             |             |   |            |             |             |   |            |            |             |   |            |             |            |   |            |            |             |   |            |            |             |   |            |             |            |   |            |             |            |   |            |             |            |   |            |            |             |   |            |             |            |   |            |             |            |   |             |            |             |   |             |             |            |   |             |             |            |   |             |             |            |   |             |             |             |
| H                                                                                                                                                                                                                                                                                                                                                                                                                                                                                                                                                                                                                                                                                                                                                                                                                                                                                                                                                                                                                                                                                                                                                                                                                                                                                                                                                                                                                                                                                                                                                                                                                                                                                                                                                                                                                                                                                                                                                                                                                                                                                                                                                                                                      | -3.15122400 | 1.97971900          | 0.38731100  |             |             |             |   |             |             |             |   |             |             |             |   |             |            |            |   |             |            |             |   |             |            |            |   |             |            |            |   |             |            |            |   |             |             |             |   |             |             |             |   |            |             |             |   |            |            |             |   |            |             |            |   |            |            |             |   |            |            |             |   |            |             |            |   |            |             |            |   |            |             |            |   |            |            |             |   |            |             |            |   |            |             |            |   |             |            |             |   |             |             |            |   |             |             |            |   |             |             |            |   |             |             |             |
| H                                                                                                                                                                                                                                                                                                                                                                                                                                                                                                                                                                                                                                                                                                                                                                                                                                                                                                                                                                                                                                                                                                                                                                                                                                                                                                                                                                                                                                                                                                                                                                                                                                                                                                                                                                                                                                                                                                                                                                                                                                                                                                                                                                                                      | -2.59679200 | 0.72954500          | 1.49883500  |             |             |             |   |             |             |             |   |             |             |             |   |             |            |            |   |             |            |             |   |             |            |            |   |             |            |            |   |             |            |            |   |             |             |             |   |             |             |             |   |            |             |             |   |            |            |             |   |            |             |            |   |            |            |             |   |            |            |             |   |            |             |            |   |            |             |            |   |            |             |            |   |            |            |             |   |            |             |            |   |            |             |            |   |             |            |             |   |             |             |            |   |             |             |            |   |             |             |            |   |             |             |             |
| C                                                                                                                                                                                                                                                                                                                                                                                                                                                                                                                                                                                                                                                                                                                                                                                                                                                                                                                                                                                                                                                                                                                                                                                                                                                                                                                                                                                                                                                                                                                                                                                                                                                                                                                                                                                                                                                                                                                                                                                                                                                                                                                                                                                                      | -3.27486800 | -0.05324300         | -0.37746500 |             |             |             |   |             |             |             |   |             |             |             |   |             |            |            |   |             |            |             |   |             |            |            |   |             |            |            |   |             |            |            |   |             |             |             |   |             |             |             |   |            |             |             |   |            |            |             |   |            |             |            |   |            |            |             |   |            |            |             |   |            |             |            |   |            |             |            |   |            |             |            |   |            |            |             |   |            |             |            |   |            |             |            |   |             |            |             |   |             |             |            |   |             |             |            |   |             |             |            |   |             |             |             |
| H                                                                                                                                                                                                                                                                                                                                                                                                                                                                                                                                                                                                                                                                                                                                                                                                                                                                                                                                                                                                                                                                                                                                                                                                                                                                                                                                                                                                                                                                                                                                                                                                                                                                                                                                                                                                                                                                                                                                                                                                                                                                                                                                                                                                      | -2.20565100 | -0.89848500         | -0.43564700 |             |             |             |   |             |             |             |   |             |             |             |   |             |            |            |   |             |            |             |   |             |            |            |   |             |            |            |   |             |            |            |   |             |             |             |   |             |             |             |   |            |             |             |   |            |            |             |   |            |             |            |   |            |            |             |   |            |            |             |   |            |             |            |   |            |             |            |   |            |             |            |   |            |            |             |   |            |             |            |   |            |             |            |   |             |            |             |   |             |             |            |   |             |             |            |   |             |             |            |   |             |             |             |
| C                                                                                                                                                                                                                                                                                                                                                                                                                                                                                                                                                                                                                                                                                                                                                                                                                                                                                                                                                                                                                                                                                                                                                                                                                                                                                                                                                                                                                                                                                                                                                                                                                                                                                                                                                                                                                                                                                                                                                                                                                                                                                                                                                                                                      | 1.10729600  | -0.05746000         | -0.05580000 |             |             |             |   |             |             |             |   |             |             |             |   |             |            |            |   |             |            |             |   |             |            |            |   |             |            |            |   |             |            |            |   |             |             |             |   |             |             |             |   |            |             |             |   |            |            |             |   |            |             |            |   |            |            |             |   |            |            |             |   |            |             |            |   |            |             |            |   |            |             |            |   |            |            |             |   |            |             |            |   |            |             |            |   |             |            |             |   |             |             |            |   |             |             |            |   |             |             |            |   |             |             |             |
| C                                                                                                                                                                                                                                                                                                                                                                                                                                                                                                                                                                                                                                                                                                                                                                                                                                                                                                                                                                                                                                                                                                                                                                                                                                                                                                                                                                                                                                                                                                                                                                                                                                                                                                                                                                                                                                                                                                                                                                                                                                                                                                                                                                                                      | 1.84587400  | 1.13390500          | -0.13948200 |             |             |             |   |             |             |             |   |             |             |             |   |             |            |            |   |             |            |             |   |             |            |            |   |             |            |            |   |             |            |            |   |             |             |             |   |             |             |             |   |            |             |             |   |            |            |             |   |            |             |            |   |            |            |             |   |            |            |             |   |            |             |            |   |            |             |            |   |            |             |            |   |            |            |             |   |            |             |            |   |            |             |            |   |             |            |             |   |             |             |            |   |             |             |            |   |             |             |            |   |             |             |             |
| C                                                                                                                                                                                                                                                                                                                                                                                                                                                                                                                                                                                                                                                                                                                                                                                                                                                                                                                                                                                                                                                                                                                                                                                                                                                                                                                                                                                                                                                                                                                                                                                                                                                                                                                                                                                                                                                                                                                                                                                                                                                                                                                                                                                                      | 1.80111700  | -1.26977700         | 0.11023600  |             |             |             |   |             |             |             |   |             |             |             |   |             |            |            |   |             |            |             |   |             |            |            |   |             |            |            |   |             |            |            |   |             |             |             |   |             |             |             |   |            |             |             |   |            |            |             |   |            |             |            |   |            |            |             |   |            |            |             |   |            |             |            |   |            |             |            |   |            |             |            |   |            |            |             |   |            |             |            |   |            |             |            |   |             |            |             |   |             |             |            |   |             |             |            |   |             |             |            |   |             |             |             |
| C                                                                                                                                                                                                                                                                                                                                                                                                                                                                                                                                                                                                                                                                                                                                                                                                                                                                                                                                                                                                                                                                                                                                                                                                                                                                                                                                                                                                                                                                                                                                                                                                                                                                                                                                                                                                                                                                                                                                                                                                                                                                                                                                                                                                      | 3.24143500  | 1.11482900          | -0.06284200 |             |             |             |   |             |             |             |   |             |             |             |   |             |            |            |   |             |            |             |   |             |            |            |   |             |            |            |   |             |            |            |   |             |             |             |   |             |             |             |   |            |             |             |   |            |            |             |   |            |             |            |   |            |            |             |   |            |            |             |   |            |             |            |   |            |             |            |   |            |             |            |   |            |            |             |   |            |             |            |   |            |             |            |   |             |            |             |   |             |             |            |   |             |             |            |   |             |             |            |   |             |             |             |
| H                                                                                                                                                                                                                                                                                                                                                                                                                                                                                                                                                                                                                                                                                                                                                                                                                                                                                                                                                                                                                                                                                                                                                                                                                                                                                                                                                                                                                                                                                                                                                                                                                                                                                                                                                                                                                                                                                                                                                                                                                                                                                                                                                                                                      | 1.34167200  | 2.08437400          | -0.27888600 |             |             |             |   |             |             |             |   |             |             |             |   |             |            |            |   |             |            |             |   |             |            |            |   |             |            |            |   |             |            |            |   |             |             |             |   |             |             |             |   |            |             |             |   |            |            |             |   |            |             |            |   |            |            |             |   |            |            |             |   |            |             |            |   |            |             |            |   |            |             |            |   |            |            |             |   |            |             |            |   |            |             |            |   |             |            |             |   |             |             |            |   |             |             |            |   |             |             |            |   |             |             |             |
| C                                                                                                                                                                                                                                                                                                                                                                                                                                                                                                                                                                                                                                                                                                                                                                                                                                                                                                                                                                                                                                                                                                                                                                                                                                                                                                                                                                                                                                                                                                                                                                                                                                                                                                                                                                                                                                                                                                                                                                                                                                                                                                                                                                                                      | 3.19120500  | -1.28665800         | 0.19664100  |             |             |             |   |             |             |             |   |             |             |             |   |             |            |            |   |             |            |             |   |             |            |            |   |             |            |            |   |             |            |            |   |             |             |             |   |             |             |             |   |            |             |             |   |            |            |             |   |            |             |            |   |            |            |             |   |            |            |             |   |            |             |            |   |            |             |            |   |            |             |            |   |            |            |             |   |            |             |            |   |            |             |            |   |             |            |             |   |             |             |            |   |             |             |            |   |             |             |            |   |             |             |             |
| H                                                                                                                                                                                                                                                                                                                                                                                                                                                                                                                                                                                                                                                                                                                                                                                                                                                                                                                                                                                                                                                                                                                                                                                                                                                                                                                                                                                                                                                                                                                                                                                                                                                                                                                                                                                                                                                                                                                                                                                                                                                                                                                                                                                                      | 1.23025700  | -2.19009800         | 0.17166300  |             |             |             |   |             |             |             |   |             |             |             |   |             |            |            |   |             |            |             |   |             |            |            |   |             |            |            |   |             |            |            |   |             |             |             |   |             |             |             |   |            |             |             |   |            |            |             |   |            |             |            |   |            |            |             |   |            |            |             |   |            |             |            |   |            |             |            |   |            |             |            |   |            |            |             |   |            |             |            |   |            |             |            |   |             |            |             |   |             |             |            |   |             |             |            |   |             |             |            |   |             |             |             |
| C                                                                                                                                                                                                                                                                                                                                                                                                                                                                                                                                                                                                                                                                                                                                                                                                                                                                                                                                                                                                                                                                                                                                                                                                                                                                                                                                                                                                                                                                                                                                                                                                                                                                                                                                                                                                                                                                                                                                                                                                                                                                                                                                                                                                      | 3.91827900  | -0.09368900         | 0.10910000  |             |             |             |   |             |             |             |   |             |             |             |   |             |            |            |   |             |            |             |   |             |            |            |   |             |            |            |   |             |            |            |   |             |             |             |   |             |             |             |   |            |             |             |   |            |            |             |   |            |             |            |   |            |            |             |   |            |            |             |   |            |             |            |   |            |             |            |   |            |             |            |   |            |            |             |   |            |             |            |   |            |             |            |   |             |            |             |   |             |             |            |   |             |             |            |   |             |             |            |   |             |             |             |
| H                                                                                                                                                                                                                                                                                                                                                                                                                                                                                                                                                                                                                                                                                                                                                                                                                                                                                                                                                                                                                                                                                                                                                                                                                                                                                                                                                                                                                                                                                                                                                                                                                                                                                                                                                                                                                                                                                                                                                                                                                                                                                                                                                                                                      | 3.79636100  | 2.04570700          | -0.13701700 |             |             |             |   |             |             |             |   |             |             |             |   |             |            |            |   |             |            |             |   |             |            |            |   |             |            |            |   |             |            |            |   |             |             |             |   |             |             |             |   |            |             |             |   |            |            |             |   |            |             |            |   |            |            |             |   |            |            |             |   |            |             |            |   |            |             |            |   |            |             |            |   |            |            |             |   |            |             |            |   |            |             |            |   |             |            |             |   |             |             |            |   |             |             |            |   |             |             |            |   |             |             |             |
| H                                                                                                                                                                                                                                                                                                                                                                                                                                                                                                                                                                                                                                                                                                                                                                                                                                                                                                                                                                                                                                                                                                                                                                                                                                                                                                                                                                                                                                                                                                                                                                                                                                                                                                                                                                                                                                                                                                                                                                                                                                                                                                                                                                                                      | 3.71049900  | -2.23106800         | 0.33275200  |             |             |             |   |             |             |             |   |             |             |             |   |             |            |            |   |             |            |             |   |             |            |            |   |             |            |            |   |             |            |            |   |             |             |             |   |             |             |             |   |            |             |             |   |            |            |             |   |            |             |            |   |            |            |             |   |            |            |             |   |            |             |            |   |            |             |            |   |            |             |            |   |            |            |             |   |            |             |            |   |            |             |            |   |             |            |             |   |             |             |            |   |             |             |            |   |             |             |            |   |             |             |             |
| H                                                                                                                                                                                                                                                                                                                                                                                                                                                                                                                                                                                                                                                                                                                                                                                                                                                                                                                                                                                                                                                                                                                                                                                                                                                                                                                                                                                                                                                                                                                                                                                                                                                                                                                                                                                                                                                                                                                                                                                                                                                                                                                                                                                                      | 5.00242000  | -0.10787900         | 0.17494300  |             |             |             |   |             |             |             |   |             |             |             |   |             |            |            |   |             |            |             |   |             |            |            |   |             |            |            |   |             |            |            |   |             |             |             |   |             |             |             |   |            |             |             |   |            |            |             |   |            |             |            |   |            |            |             |   |            |            |             |   |            |             |            |   |            |             |            |   |            |             |            |   |            |            |             |   |            |             |            |   |            |             |            |   |             |            |             |   |             |             |            |   |             |             |            |   |             |             |            |   |             |             |             |
| H                                                                                                                                                                                                                                                                                                                                                                                                                                                                                                                                                                                                                                                                                                                                                                                                                                                                                                                                                                                                                                                                                                                                                                                                                                                                                                                                                                                                                                                                                                                                                                                                                                                                                                                                                                                                                                                                                                                                                                                                                                                                                                                                                                                                      | -3.40259300 | 0.21724300          | -1.43195000 |             |             |             |   |             |             |             |   |             |             |             |   |             |            |            |   |             |            |             |   |             |            |            |   |             |            |            |   |             |            |            |   |             |             |             |   |             |             |             |   |            |             |             |   |            |            |             |   |            |             |            |   |            |            |             |   |            |            |             |   |            |             |            |   |            |             |            |   |            |             |            |   |            |            |             |   |            |             |            |   |            |             |            |   |             |            |             |   |             |             |            |   |             |             |            |   |             |             |            |   |             |             |             |
| C                                                                                                                                                                                                                                                                                                                                                                                                                                                                                                                                                                                                                                                                                                                                                                                                                                                                                                                                                                                                                                                                                                                                                                                                                                                                                                                                                                                                                                                                                                                                                                                                                                                                                                                                                                                                                                                                                                                                                                                                                                                                                                                                                                                                      | -4.47136500 | -0.75545500         | 0.22114500  |             |             |             |   |             |             |             |   |             |             |             |   |             |            |            |   |             |            |             |   |             |            |            |   |             |            |            |   |             |            |            |   |             |             |             |   |             |             |             |   |            |             |             |   |            |            |             |   |            |             |            |   |            |            |             |   |            |            |             |   |            |             |            |   |            |             |            |   |            |             |            |   |            |            |             |   |            |             |            |   |            |             |            |   |             |            |             |   |             |             |            |   |             |             |            |   |             |             |            |   |             |             |             |
| H                                                                                                                                                                                                                                                                                                                                                                                                                                                                                                                                                                                                                                                                                                                                                                                                                                                                                                                                                                                                                                                                                                                                                                                                                                                                                                                                                                                                                                                                                                                                                                                                                                                                                                                                                                                                                                                                                                                                                                                                                                                                                                                                                                                                      | -4.23706100 | -1.17124800         | 1.20829000  |             |             |             |   |             |             |             |   |             |             |             |   |             |            |            |   |             |            |             |   |             |            |            |   |             |            |            |   |             |            |            |   |             |             |             |   |             |             |             |   |            |             |             |   |            |            |             |   |            |             |            |   |            |            |             |   |            |            |             |   |            |             |            |   |            |             |            |   |            |             |            |   |            |            |             |   |            |             |            |   |            |             |            |   |             |            |             |   |             |             |            |   |             |             |            |   |             |             |            |   |             |             |             |
| H                                                                                                                                                                                                                                                                                                                                                                                                                                                                                                                                                                                                                                                                                                                                                                                                                                                                                                                                                                                                                                                                                                                                                                                                                                                                                                                                                                                                                                                                                                                                                                                                                                                                                                                                                                                                                                                                                                                                                                                                                                                                                                                                                                                                      | -5.31877400 | -0.06379400         | 0.35313600  |             |             |             |   |             |             |             |   |             |             |             |   |             |            |            |   |             |            |             |   |             |            |            |   |             |            |            |   |             |            |            |   |             |             |             |   |             |             |             |   |            |             |             |   |            |            |             |   |            |             |            |   |            |            |             |   |            |            |             |   |            |             |            |   |            |             |            |   |            |             |            |   |            |            |             |   |            |             |            |   |            |             |            |   |             |            |             |   |             |             |            |   |             |             |            |   |             |             |            |   |             |             |             |
| H                                                                                                                                                                                                                                                                                                                                                                                                                                                                                                                                                                                                                                                                                                                                                                                                                                                                                                                                                                                                                                                                                                                                                                                                                                                                                                                                                                                                                                                                                                                                                                                                                                                                                                                                                                                                                                                                                                                                                                                                                                                                                                                                                                                                      | -4.81809100 | -1.57458700         | -0.41743400 |             |             |             |   |             |             |             |   |             |             |             |   |             |            |            |   |             |            |             |   |             |            |            |   |             |            |            |   |             |            |            |   |             |             |             |   |             |             |             |   |            |             |             |   |            |            |             |   |            |             |            |   |            |            |             |   |            |            |             |   |            |             |            |   |            |             |            |   |            |             |            |   |            |            |             |   |            |             |            |   |            |             |            |   |             |            |             |   |             |             |            |   |             |             |            |   |             |             |            |   |             |             |             |
| 6                                                                                                                                                                                                                                                                                                                                                                                                                                                                                                                                                                                                                                                                                                                                                                                                                                                                                                                                                                                                                                                                                                                                                                                                                                                                                                                                                                                                                                                                                                                                                                                                                                                                                                                                                                                                                                                                                                                                                                                                                                                                                                                                                                                                      |             |                     |             |             |             |             |   |             |             |             |   |             |             |             |   |             |            |            |   |             |            |             |   |             |            |            |   |             |            |            |   |             |            |            |   |             |             |             |   |             |             |             |   |            |             |             |   |            |            |             |   |            |             |            |   |            |            |             |   |            |            |             |   |            |             |            |   |            |             |            |   |            |             |            |   |            |            |             |   |            |             |            |   |            |             |            |   |             |            |             |   |             |             |            |   |             |             |            |   |             |             |            |   |             |             |             |
| <p>Cartesian Coordinates</p> <table border="1"> <tbody> <tr><td>C</td><td>-0.31013800</td><td>0.29523400</td><td>-0.19025100</td></tr> <tr><td>N</td><td>-0.76772500</td><td>1.49162800</td><td>-0.22976300</td></tr> <tr><td>C</td><td>-1.16730900</td><td>-0.96640700</td><td>-0.26678300</td></tr> </tbody> </table>                                                                                                                                                                                                                                                                                                                                                                                                                                                                                                                                                                                                                                                                                                                                                                                                                                                                                                                                                                                                                                                                                                                                                                                                                                                                                                                                                                                                                                                                                                                                                                                                                                                                                                                                                                                                                                                                                |             |                     | C           | -0.31013800 | 0.29523400  | -0.19025100 | N | -0.76772500 | 1.49162800  | -0.22976300 | C | -1.16730900 | -0.96640700 | -0.26678300 |   |             |            |            |   |             |            |             |   |             |            |            |   |             |            |            |   |             |            |            |   |             |             |             |   |             |             |             |   |            |             |             |   |            |            |             |   |            |             |            |   |            |            |             |   |            |            |             |   |            |             |            |   |            |             |            |   |            |             |            |   |            |            |             |   |            |             |            |   |            |             |            |   |             |            |             |   |             |             |            |   |             |             |            |   |             |             |            |   |             |             |             |
| C                                                                                                                                                                                                                                                                                                                                                                                                                                                                                                                                                                                                                                                                                                                                                                                                                                                                                                                                                                                                                                                                                                                                                                                                                                                                                                                                                                                                                                                                                                                                                                                                                                                                                                                                                                                                                                                                                                                                                                                                                                                                                                                                                                                                      | -0.31013800 | 0.29523400          | -0.19025100 |             |             |             |   |             |             |             |   |             |             |             |   |             |            |            |   |             |            |             |   |             |            |            |   |             |            |            |   |             |            |            |   |             |             |             |   |             |             |             |   |            |             |             |   |            |            |             |   |            |             |            |   |            |            |             |   |            |            |             |   |            |             |            |   |            |             |            |   |            |             |            |   |            |            |             |   |            |             |            |   |            |             |            |   |             |            |             |   |             |             |            |   |             |             |            |   |             |             |            |   |             |             |             |
| N                                                                                                                                                                                                                                                                                                                                                                                                                                                                                                                                                                                                                                                                                                                                                                                                                                                                                                                                                                                                                                                                                                                                                                                                                                                                                                                                                                                                                                                                                                                                                                                                                                                                                                                                                                                                                                                                                                                                                                                                                                                                                                                                                                                                      | -0.76772500 | 1.49162800          | -0.22976300 |             |             |             |   |             |             |             |   |             |             |             |   |             |            |            |   |             |            |             |   |             |            |            |   |             |            |            |   |             |            |            |   |             |             |             |   |             |             |             |   |            |             |             |   |            |            |             |   |            |             |            |   |            |            |             |   |            |            |             |   |            |             |            |   |            |             |            |   |            |             |            |   |            |            |             |   |            |             |            |   |            |             |            |   |             |            |             |   |             |             |            |   |             |             |            |   |             |             |            |   |             |             |             |
| C                                                                                                                                                                                                                                                                                                                                                                                                                                                                                                                                                                                                                                                                                                                                                                                                                                                                                                                                                                                                                                                                                                                                                                                                                                                                                                                                                                                                                                                                                                                                                                                                                                                                                                                                                                                                                                                                                                                                                                                                                                                                                                                                                                                                      | -1.16730900 | -0.96640700         | -0.26678300 |             |             |             |   |             |             |             |   |             |             |             |   |             |            |            |   |             |            |             |   |             |            |            |   |             |            |            |   |             |            |            |   |             |             |             |   |             |             |             |   |            |             |             |   |            |            |             |   |            |             |            |   |            |            |             |   |            |            |             |   |            |             |            |   |            |             |            |   |            |             |            |   |            |            |             |   |            |             |            |   |            |             |            |   |             |            |             |   |             |             |            |   |             |             |            |   |             |             |            |   |             |             |             |



| No.                   | Species                                                                             | Optimized Structure |  |  |                                                                                      |
|-----------------------|-------------------------------------------------------------------------------------|---------------------|--|--|--------------------------------------------------------------------------------------|
| H                     | -0.74851000 -1.61523100 -1.04582900                                                 |                     |  |  |                                                                                      |
| H                     | -1.05053500 -1.52203500 0.67446100                                                  |                     |  |  |                                                                                      |
| C                     | -2.66190200 -0.75479200 -0.54791600                                                 |                     |  |  |                                                                                      |
| H                     | -3.10040300 -1.75103500 -0.74729700                                                 |                     |  |  |                                                                                      |
| H                     | -2.79107400 -0.20583600 -1.49450000                                                 |                     |  |  |                                                                                      |
| C                     | -3.43054600 -0.08067000 0.54533800                                                  |                     |  |  |                                                                                      |
| C                     | 1.17296000 0.11422300 -0.06236400                                                   |                     |  |  |                                                                                      |
| C                     | 1.76618100 -1.15185100 0.07596400                                                   |                     |  |  |                                                                                      |
| C                     | 2.00926600 1.24597800 -0.07282800                                                   |                     |  |  |                                                                                      |
| C                     | 3.15222600 -1.28428800 0.20161500                                                   |                     |  |  |                                                                                      |
| H                     | 1.15620200 -2.04844100 0.09305700                                                   |                     |  |  |                                                                                      |
| C                     | 3.39017300 1.11400000 0.04864000                                                    |                     |  |  |                                                                                      |
| H                     | 1.54943200 2.22231900 -0.17693800                                                   |                     |  |  |                                                                                      |
| C                     | 3.96919300 -0.15311100 0.18696500                                                   |                     |  |  |                                                                                      |
| H                     | 3.58968600 -2.27260900 0.31062400                                                   |                     |  |  |                                                                                      |
| H                     | 4.01862500 2.00012500 0.03605400                                                    |                     |  |  |                                                                                      |
| H                     | 5.04647000 -0.25553200 0.28229500                                                   |                     |  |  |                                                                                      |
| H                     | -3.04011400 -0.13472000 1.55998600                                                  |                     |  |  |                                                                                      |
| C                     | -4.84863800 0.33974700 0.34206100                                                   |                     |  |  |                                                                                      |
| H                     | -5.53624800 -0.52515500 0.32248700                                                  |                     |  |  |                                                                                      |
| H                     | -5.19507800 1.00360300 1.14042000                                                   |                     |  |  |                                                                                      |
| H                     | -4.98494100 0.85888000 -0.61648600                                                  |                     |  |  |                                                                                      |
| H                     | -1.78822500 1.49589500 -0.29263600                                                  |                     |  |  |                                                                                      |
| 7                     | 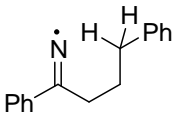 |                     |  |  |  |
| Cartesian Coordinates |                                                                                     |                     |  |  |                                                                                      |
| C                     | -1.51634200 0.28988600 0.45079200                                                   |                     |  |  |                                                                                      |
| N                     | -0.99905900 1.43386900 0.58018300                                                   |                     |  |  |                                                                                      |
| C                     | -0.66065300 -0.97076400 0.63423800                                                  |                     |  |  |                                                                                      |
| H                     | -1.03359700 -1.47944400 1.53290200                                                  |                     |  |  |                                                                                      |
| H                     | -0.86601900 -1.64295500 -0.20925400                                                 |                     |  |  |                                                                                      |
| C                     | 0.85010000 -0.73731500 0.77162900                                                   |                     |  |  |                                                                                      |
| H                     | 1.30968300 -1.68131800 1.08934500                                                   |                     |  |  |                                                                                      |
| H                     | 1.04165800 -0.01198100 1.57003300                                                   |                     |  |  |                                                                                      |
| C                     | 1.53572100 -0.26397900 -0.52767800                                                  |                     |  |  |                                                                                      |
| H                     | 1.08128800 0.67853500 -0.85012600                                                   |                     |  |  |                                                                                      |
| C                     | -2.97804300 0.14143000 0.13612900                                                   |                     |  |  |                                                                                      |
| C                     | -3.64251200 -1.08428700 0.29653300                                                  |                     |  |  |                                                                                      |
| C                     | -3.70662100 1.25375900 -0.32256000                                                  |                     |  |  |                                                                                      |

| No.                   | Species                                                                             | Optimized Structure                                                                 |  |  |
|-----------------------|-------------------------------------------------------------------------------------|-------------------------------------------------------------------------------------|--|--|
| C                     | -5.00613700 -1.19403800 0.01056600                                                  |                                                                                     |  |  |
| H                     | -3.10715400 -1.95852900 0.65078200                                                  |                                                                                     |  |  |
| C                     | -5.06522200 1.14091100 -0.60873800                                                  |                                                                                     |  |  |
| H                     | -3.19503400 2.20127800 -0.45654100                                                  |                                                                                     |  |  |
| C                     | -5.72107300 -0.08402600 -0.44252300                                                 |                                                                                     |  |  |
| H                     | -5.50658600 -2.14887200 0.14280000                                                  |                                                                                     |  |  |
| H                     | -5.61329900 2.00803700 -0.96560100                                                  |                                                                                     |  |  |
| H                     | -6.77998500 -0.17159300 -0.66746200                                                 |                                                                                     |  |  |
| H                     | 1.34481700 -1.00027800 -1.31958300                                                  |                                                                                     |  |  |
| C                     | 3.02911600 -0.07565800 -0.36289500                                                  |                                                                                     |  |  |
| C                     | 3.54968300 1.14326400 0.09854800                                                    |                                                                                     |  |  |
| C                     | 3.92555200 -1.11908000 -0.63738200                                                  |                                                                                     |  |  |
| C                     | 4.92387500 1.31362900 0.28382500                                                    |                                                                                     |  |  |
| H                     | 2.87079300 1.96624400 0.30929400                                                    |                                                                                     |  |  |
| C                     | 5.30128900 -0.95408900 -0.45420700                                                  |                                                                                     |  |  |
| H                     | 3.54319600 -2.06891600 -1.00515900                                                  |                                                                                     |  |  |
| C                     | 5.80544900 0.26425600 0.00852700                                                    |                                                                                     |  |  |
| H                     | 5.30599800 2.26712500 0.63800800                                                    |                                                                                     |  |  |
| H                     | 5.97802600 -1.77432100 -0.67770900                                                  |                                                                                     |  |  |
| H                     | 6.87453800 0.39651000 0.14815800                                                    |                                                                                     |  |  |
| 8                     | 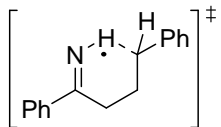 |  |  |  |
| Cartesian Coordinates |                                                                                     |                                                                                     |  |  |
| C                     | 1.29031300 0.20903400 -0.21096100                                                   |                                                                                     |  |  |
| N                     | 0.52231000 -0.68603000 -0.69207700                                                  |                                                                                     |  |  |
| C                     | 0.76300300 1.58809200 0.21993400                                                    |                                                                                     |  |  |
| H                     | 1.35644900 1.96749400 1.05709600                                                    |                                                                                     |  |  |
| H                     | 0.91719100 2.28573600 -0.61599600                                                   |                                                                                     |  |  |
| C                     | -0.72244600 1.53142300 0.60173700                                                   |                                                                                     |  |  |
| H                     | -1.09992000 2.55259900 0.75520800                                                   |                                                                                     |  |  |
| H                     | -0.81556400 1.01588200 1.56387000                                                   |                                                                                     |  |  |
| C                     | -1.52947700 0.80699800 -0.46519600                                                  |                                                                                     |  |  |
| H                     | -0.69087100 -0.16549300 -0.68087800                                                 |                                                                                     |  |  |
| C                     | 2.75846600 -0.07343700 -0.08547700                                                  |                                                                                     |  |  |
| C                     | 3.69834000 0.96079800 0.04891600                                                    |                                                                                     |  |  |
| C                     | 3.21645300 -1.40247200 -0.12460200                                                  |                                                                                     |  |  |
| C                     | 5.06354800 0.67458000 0.13691200                                                    |                                                                                     |  |  |
| H                     | 3.37548400 1.99645800 0.07194900                                                    |                                                                                     |  |  |
| C                     | 4.57666300 -1.68673200 -0.02613200                                                  |                                                                                     |  |  |

| No.                   | Species                                                                            | Optimized Structure                                                                 |  |  |
|-----------------------|------------------------------------------------------------------------------------|-------------------------------------------------------------------------------------|--|--|
| H                     | 2.48986500 -2.20108800 -0.23009600                                                 |                                                                                     |  |  |
| C                     | 5.50663000 -0.64880100 0.10345500                                                  |                                                                                     |  |  |
| H                     | 5.77785700 1.48730900 0.23237600                                                   |                                                                                     |  |  |
| H                     | 4.91367100 -2.71913100 -0.04977300                                                 |                                                                                     |  |  |
| H                     | 6.56710600 -0.87137800 0.17867600                                                  |                                                                                     |  |  |
| H                     | -1.50276000 1.32879900 -1.42809700                                                 |                                                                                     |  |  |
| C                     | -2.86801300 0.25562600 -0.17188900                                                 |                                                                                     |  |  |
| C                     | -3.83459200 0.19055700 -1.19857400                                                 |                                                                                     |  |  |
| C                     | -3.22171300 -0.26475800 1.09099400                                                 |                                                                                     |  |  |
| C                     | -5.09656900 -0.35643400 -0.97429500                                                |                                                                                     |  |  |
| H                     | -3.58515200 0.58019900 -2.18253500                                                 |                                                                                     |  |  |
| C                     | -4.48484400 -0.81180400 1.31600900                                                 |                                                                                     |  |  |
| H                     | -2.50281500 -0.24984700 1.90416500                                                 |                                                                                     |  |  |
| C                     | -5.43087300 -0.86043700 0.28710300                                                 |                                                                                     |  |  |
| H                     | -5.82122400 -0.38784700 -1.78321800                                                |                                                                                     |  |  |
| H                     | -4.73099200 -1.20456300 2.29873400                                                 |                                                                                     |  |  |
| H                     | -6.41383300 -1.28632500 0.46546500                                                 |                                                                                     |  |  |
| 9                     | 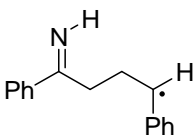 |  |  |  |
| Cartesian Coordinates |                                                                                    |                                                                                     |  |  |
| C                     | -1.44999500 -0.01696400 -0.40819900                                                |                                                                                     |  |  |
| N                     | -0.90653500 -1.00768700 -1.01304400                                                |                                                                                     |  |  |
| C                     | -0.70684600 1.23235400 0.06050300                                                  |                                                                                     |  |  |
| H                     | -1.19821500 2.10524800 -0.38723800                                                 |                                                                                     |  |  |
| H                     | -0.84960900 1.33668200 1.14481700                                                  |                                                                                     |  |  |
| C                     | 0.79278900 1.28874600 -0.25857600                                                  |                                                                                     |  |  |
| H                     | 1.14051500 2.31010400 -0.03237700                                                  |                                                                                     |  |  |
| H                     | 0.94398800 1.17768300 -1.34343300                                                  |                                                                                     |  |  |
| C                     | 1.62340300 0.29523900 0.50102400                                                   |                                                                                     |  |  |
| C                     | -2.92486200 -0.07819500 -0.14587200                                                |                                                                                     |  |  |
| C                     | -3.61307000 0.95020700 0.51968800                                                  |                                                                                     |  |  |
| C                     | -3.65530300 -1.20176000 -0.57545100                                                |                                                                                     |  |  |
| C                     | -4.98908400 0.85999400 0.74940200                                                  |                                                                                     |  |  |
| H                     | -3.08665700 1.83242100 0.86730000                                                  |                                                                                     |  |  |
| C                     | -5.02601100 -1.29135500 -0.34722900                                                |                                                                                     |  |  |
| H                     | -3.12227900 -1.99462900 -1.08795900                                                |                                                                                     |  |  |
| C                     | -5.70045000 -0.25996500 0.31705000                                                 |                                                                                     |  |  |
| H                     | -5.50130700 1.66644300 1.26632300                                                  |                                                                                     |  |  |
| H                     | -5.57190900 -2.16693600 -0.68722600                                                |                                                                                     |  |  |

| No.                   | Species                                                                           | Optimized Structure                                                                |  |  |
|-----------------------|-----------------------------------------------------------------------------------|------------------------------------------------------------------------------------|--|--|
| H                     | -6.76974500 -0.33054200 0.49500700                                                |                                                                                    |  |  |
| H                     | 1.13776800 -0.26075200 1.30062400                                                 |                                                                                    |  |  |
| C                     | 3.00604600 0.06317700 0.29302200                                                  |                                                                                    |  |  |
| C                     | 3.76529800 0.75371400 -0.69809300                                                 |                                                                                    |  |  |
| C                     | 3.69971000 -0.89333900 1.09388200                                                 |                                                                                    |  |  |
| C                     | 5.12074600 0.49865100 -0.86907900                                                 |                                                                                    |  |  |
| H                     | 3.28005100 1.49248500 -1.32816800                                                 |                                                                                    |  |  |
| C                     | 5.05270900 -1.14058000 0.91371900                                                 |                                                                                    |  |  |
| H                     | 3.14594100 -1.43506300 1.85647600                                                 |                                                                                    |  |  |
| C                     | 5.77715300 -0.44754400 -0.06925600                                                |                                                                                    |  |  |
| H                     | 5.67530800 1.03953900 -1.63103200                                                 |                                                                                    |  |  |
| H                     | 5.55301400 -1.87581500 1.53780200                                                 |                                                                                    |  |  |
| H                     | 6.83604100 -0.64253400 -0.20891400                                                |                                                                                    |  |  |
| H                     | 0.09944900 -0.87480900 -1.12990800                                                |                                                                                    |  |  |
| 10                    | 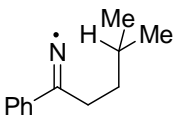 |  |  |  |
| Cartesian Coordinates |                                                                                   |                                                                                    |  |  |
| C                     | 0.04780100 0.40289900 -0.56054300                                                 |                                                                                    |  |  |
| N                     | -0.38145200 1.57447200 -0.75029600                                                |                                                                                    |  |  |
| C                     | -0.88894400 -0.80406300 -0.70116400                                               |                                                                                    |  |  |
| H                     | -0.54739700 -1.36723900 -1.57989300                                               |                                                                                    |  |  |
| H                     | -0.72400000 -1.46007300 0.16151800                                                |                                                                                    |  |  |
| C                     | -2.38052800 -0.47815500 -0.86908100                                               |                                                                                    |  |  |
| H                     | -2.89626300 -1.41678900 -1.11740000                                               |                                                                                    |  |  |
| H                     | -2.50106600 0.18156000 -1.73655100                                                |                                                                                    |  |  |
| C                     | -3.08833900 0.16044600 0.34475000                                                 |                                                                                    |  |  |
| H                     | -2.55882800 1.08918100 0.59292000                                                 |                                                                                    |  |  |
| C                     | 1.49161800 0.16886800 -0.21389000                                                 |                                                                                    |  |  |
| C                     | 2.08739300 -1.09290300 -0.36432400                                                |                                                                                    |  |  |
| C                     | 2.27275900 1.23571200 0.26543800                                                  |                                                                                    |  |  |
| C                     | 3.43550300 -1.28241200 -0.04843900                                                |                                                                                    |  |  |
| H                     | 1.50994300 -1.93296700 -0.73484600                                                |                                                                                    |  |  |
| C                     | 3.61588400 1.04330200 0.58183100                                                  |                                                                                    |  |  |
| H                     | 1.81349900 2.21060400 0.39243900                                                  |                                                                                    |  |  |
| C                     | 4.20323200 -0.21703700 0.42545300                                                 |                                                                                    |  |  |
| H                     | 3.88274800 -2.26424400 -0.17366600                                                |                                                                                    |  |  |
| H                     | 4.20492700 1.87609300 0.95494200                                                  |                                                                                    |  |  |
| H                     | 5.24981900 -0.36666700 0.67417100                                                 |                                                                                    |  |  |
| C                     | -4.53179800 0.53092200 -0.03068800                                                |                                                                                    |  |  |

| No.                   | Species                                                                           | Optimized Structure                                                                |  |  |
|-----------------------|-----------------------------------------------------------------------------------|------------------------------------------------------------------------------------|--|--|
| H                     | -5.11047300 -0.36279100 -0.29904100                                               |                                                                                    |  |  |
| H                     | -5.04470100 1.01932700 0.80537900                                                 |                                                                                    |  |  |
| H                     | -4.55767500 1.21604600 -0.88539300                                                |                                                                                    |  |  |
| C                     | -3.06994900 -0.74955600 1.58344300                                                |                                                                                    |  |  |
| H                     | -2.05293200 -0.96308200 1.92913300                                                |                                                                                    |  |  |
| H                     | -3.60275400 -0.27998300 2.41781100                                                |                                                                                    |  |  |
| H                     | -3.56247000 -1.70841000 1.37383600                                                |                                                                                    |  |  |
| 11                    | 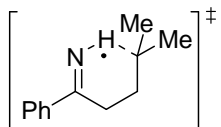 |  |  |  |
| Cartesian Coordinates |                                                                                   |                                                                                    |  |  |
| C                     | 0.08518900 -0.09675600 -0.01020900                                                |                                                                                    |  |  |
| N                     | 0.68576700 -1.19078600 0.25419300                                                 |                                                                                    |  |  |
| C                     | 0.84606600 1.20607400 -0.30106800                                                 |                                                                                    |  |  |
| H                     | 0.29923300 1.79781800 -1.04174500                                                 |                                                                                    |  |  |
| H                     | 0.85870100 1.80476800 0.62046000                                                  |                                                                                    |  |  |
| C                     | 2.27495500 0.93532600 -0.79957200                                                 |                                                                                    |  |  |
| H                     | 2.84197700 1.88035900 -0.80530400                                                 |                                                                                    |  |  |
| H                     | 2.22052200 0.59650600 -1.84169100                                                 |                                                                                    |  |  |
| C                     | 2.99305900 -0.12497600 0.02841400                                                 |                                                                                    |  |  |
| H                     | 1.92492200 -0.92321300 0.19109600                                                 |                                                                                    |  |  |
| C                     | -1.41536400 -0.06562200 -0.00645500                                               |                                                                                    |  |  |
| C                     | -2.13103500 1.14194600 0.03238400                                                 |                                                                                    |  |  |
| C                     | -2.13486100 -1.27423800 -0.02326400                                               |                                                                                    |  |  |
| C                     | -3.52862800 1.14246300 0.05746900                                                 |                                                                                    |  |  |
| H                     | -1.60641000 2.09129100 0.05578600                                                 |                                                                                    |  |  |
| C                     | -3.52762400 -1.27249600 -0.00775100                                               |                                                                                    |  |  |
| H                     | -1.58168200 -2.20694200 -0.05057300                                               |                                                                                    |  |  |
| C                     | -4.23145100 -0.06322000 0.03401000                                                |                                                                                    |  |  |
| H                     | -4.06492200 2.08640600 0.09441300                                                 |                                                                                    |  |  |
| H                     | -4.06719100 -2.21513500 -0.02869600                                               |                                                                                    |  |  |
| H                     | -5.31760600 -0.06269000 0.04715900                                                |                                                                                    |  |  |
| C                     | 4.05786200 -0.91052300 -0.71179000                                                |                                                                                    |  |  |
| H                     | 3.67516700 -1.32361800 -1.65152800                                                |                                                                                    |  |  |
| H                     | 4.91957000 -0.26923100 -0.96019400                                                |                                                                                    |  |  |
| H                     | 4.43682100 -1.74023000 -0.10489200                                                |                                                                                    |  |  |
| C                     | 3.39826900 0.30730800 1.42722800                                                  |                                                                                    |  |  |
| H                     | 2.57188000 0.77293700 1.97471600                                                  |                                                                                    |  |  |
| H                     | 3.74924300 -0.54468300 2.01950700                                                 |                                                                                    |  |  |
| H                     | 4.22078800 1.03943700 1.38576300                                                  |                                                                                    |  |  |

| No.                                                                                                                                                                                                                                                                                                                                                                                                                                                                                                                                                                                                                                                                                                                                                                                                                                                                                                                                                                                                                                                                                                                                                                                                                                                                                                                                                                                                                                                                                                                                                                                                                                                                                                                                                                                                                                                                                                                                                                                                                                                                                                                                                                                                                                                                                                                                                                                                                                                 | Species                                                                             | Optimized Structure                                                                  |             |             |            |             |   |             |            |             |   |             |             |             |   |             |             |             |   |             |             |            |   |             |             |             |   |             |             |             |   |             |             |             |   |             |             |            |   |            |            |             |   |            |             |             |   |            |            |            |   |            |             |            |   |            |             |             |   |            |            |            |   |            |            |            |   |            |             |            |   |            |             |            |   |            |            |            |   |            |             |            |   |             |            |             |   |             |             |             |   |             |            |            |   |             |            |             |   |             |             |            |   |             |             |            |   |             |            |            |   |             |             |            |   |             |            |             |
|-----------------------------------------------------------------------------------------------------------------------------------------------------------------------------------------------------------------------------------------------------------------------------------------------------------------------------------------------------------------------------------------------------------------------------------------------------------------------------------------------------------------------------------------------------------------------------------------------------------------------------------------------------------------------------------------------------------------------------------------------------------------------------------------------------------------------------------------------------------------------------------------------------------------------------------------------------------------------------------------------------------------------------------------------------------------------------------------------------------------------------------------------------------------------------------------------------------------------------------------------------------------------------------------------------------------------------------------------------------------------------------------------------------------------------------------------------------------------------------------------------------------------------------------------------------------------------------------------------------------------------------------------------------------------------------------------------------------------------------------------------------------------------------------------------------------------------------------------------------------------------------------------------------------------------------------------------------------------------------------------------------------------------------------------------------------------------------------------------------------------------------------------------------------------------------------------------------------------------------------------------------------------------------------------------------------------------------------------------------------------------------------------------------------------------------------------------|-------------------------------------------------------------------------------------|--------------------------------------------------------------------------------------|-------------|-------------|------------|-------------|---|-------------|------------|-------------|---|-------------|-------------|-------------|---|-------------|-------------|-------------|---|-------------|-------------|------------|---|-------------|-------------|-------------|---|-------------|-------------|-------------|---|-------------|-------------|-------------|---|-------------|-------------|------------|---|------------|------------|-------------|---|------------|-------------|-------------|---|------------|------------|------------|---|------------|-------------|------------|---|------------|-------------|-------------|---|------------|------------|------------|---|------------|------------|------------|---|------------|-------------|------------|---|------------|-------------|------------|---|------------|------------|------------|---|------------|-------------|------------|---|-------------|------------|-------------|---|-------------|-------------|-------------|---|-------------|------------|------------|---|-------------|------------|-------------|---|-------------|-------------|------------|---|-------------|-------------|------------|---|-------------|------------|------------|---|-------------|-------------|------------|---|-------------|------------|-------------|
| 12                                                                                                                                                                                                                                                                                                                                                                                                                                                                                                                                                                                                                                                                                                                                                                                                                                                                                                                                                                                                                                                                                                                                                                                                                                                                                                                                                                                                                                                                                                                                                                                                                                                                                                                                                                                                                                                                                                                                                                                                                                                                                                                                                                                                                                                                                                                                                                                                                                                  | 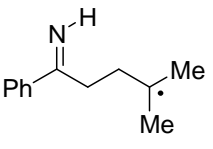   |    |             |             |            |             |   |             |            |             |   |             |             |             |   |             |             |             |   |             |             |            |   |             |             |             |   |             |             |             |   |             |             |             |   |             |             |            |   |            |            |             |   |            |             |             |   |            |            |            |   |            |             |            |   |            |             |             |   |            |            |            |   |            |            |            |   |            |             |            |   |            |             |            |   |            |            |            |   |            |             |            |   |             |            |             |   |             |             |             |   |             |            |            |   |             |            |             |   |             |             |            |   |             |             |            |   |             |            |            |   |             |             |            |   |             |            |             |
| <p>Cartesian Coordinates</p> <table border="0"> <tbody> <tr><td>C</td><td>-0.01988700</td><td>0.33594200</td><td>-0.31423000</td></tr> <tr><td>N</td><td>-0.47368800</td><td>1.53358600</td><td>-0.26687900</td></tr> <tr><td>C</td><td>-0.87422700</td><td>-0.90703000</td><td>-0.54892500</td></tr> <tr><td>H</td><td>-0.42676200</td><td>-1.47482800</td><td>-1.37427100</td></tr> <tr><td>H</td><td>-0.78828100</td><td>-1.55894500</td><td>0.33043800</td></tr> <tr><td>C</td><td>-2.35544300</td><td>-0.66491000</td><td>-0.88339300</td></tr> <tr><td>H</td><td>-2.78504200</td><td>-1.65392500</td><td>-1.13989800</td></tr> <tr><td>H</td><td>-2.42631200</td><td>-0.08089200</td><td>-1.81176600</td></tr> <tr><td>C</td><td>-3.21343600</td><td>-0.02180900</td><td>0.17520900</td></tr> <tr><td>C</td><td>1.45489900</td><td>0.13496200</td><td>-0.12820200</td></tr> <tr><td>C</td><td>2.04275200</td><td>-1.14095500</td><td>-0.10358200</td></tr> <tr><td>C</td><td>2.28808900</td><td>1.25712400</td><td>0.03626800</td></tr> <tr><td>C</td><td>3.42030800</td><td>-1.29234100</td><td>0.08057200</td></tr> <tr><td>H</td><td>1.43497500</td><td>-2.03111500</td><td>-0.22400500</td></tr> <tr><td>C</td><td>3.66062900</td><td>1.10669300</td><td>0.21674900</td></tr> <tr><td>H</td><td>1.83236300</td><td>2.24078700</td><td>0.01976800</td></tr> <tr><td>C</td><td>4.23424700</td><td>-0.17019600</td><td>0.24044700</td></tr> <tr><td>H</td><td>3.85353000</td><td>-2.28835300</td><td>0.09833200</td></tr> <tr><td>H</td><td>4.28669700</td><td>1.98596900</td><td>0.34022700</td></tr> <tr><td>H</td><td>5.30494200</td><td>-0.28713000</td><td>0.38202300</td></tr> <tr><td>C</td><td>-4.54033500</td><td>0.52496400</td><td>-0.25889800</td></tr> <tr><td>H</td><td>-5.29669300</td><td>-0.27603100</td><td>-0.36378500</td></tr> <tr><td>H</td><td>-4.94289200</td><td>1.23862300</td><td>0.46929900</td></tr> <tr><td>H</td><td>-4.47996900</td><td>1.02620500</td><td>-1.23220700</td></tr> <tr><td>C</td><td>-3.05025700</td><td>-0.41709800</td><td>1.61196300</td></tr> <tr><td>H</td><td>-2.00467600</td><td>-0.40222700</td><td>1.93842600</td></tr> <tr><td>H</td><td>-3.61382100</td><td>0.24981100</td><td>2.27306000</td></tr> <tr><td>H</td><td>-3.42588700</td><td>-1.44127700</td><td>1.79791400</td></tr> <tr><td>H</td><td>-1.49038900</td><td>1.54614800</td><td>-0.37927000</td></tr> </tbody> </table> |                                                                                     |                                                                                      | C           | -0.01988700 | 0.33594200 | -0.31423000 | N | -0.47368800 | 1.53358600 | -0.26687900 | C | -0.87422700 | -0.90703000 | -0.54892500 | H | -0.42676200 | -1.47482800 | -1.37427100 | H | -0.78828100 | -1.55894500 | 0.33043800 | C | -2.35544300 | -0.66491000 | -0.88339300 | H | -2.78504200 | -1.65392500 | -1.13989800 | H | -2.42631200 | -0.08089200 | -1.81176600 | C | -3.21343600 | -0.02180900 | 0.17520900 | C | 1.45489900 | 0.13496200 | -0.12820200 | C | 2.04275200 | -1.14095500 | -0.10358200 | C | 2.28808900 | 1.25712400 | 0.03626800 | C | 3.42030800 | -1.29234100 | 0.08057200 | H | 1.43497500 | -2.03111500 | -0.22400500 | C | 3.66062900 | 1.10669300 | 0.21674900 | H | 1.83236300 | 2.24078700 | 0.01976800 | C | 4.23424700 | -0.17019600 | 0.24044700 | H | 3.85353000 | -2.28835300 | 0.09833200 | H | 4.28669700 | 1.98596900 | 0.34022700 | H | 5.30494200 | -0.28713000 | 0.38202300 | C | -4.54033500 | 0.52496400 | -0.25889800 | H | -5.29669300 | -0.27603100 | -0.36378500 | H | -4.94289200 | 1.23862300 | 0.46929900 | H | -4.47996900 | 1.02620500 | -1.23220700 | C | -3.05025700 | -0.41709800 | 1.61196300 | H | -2.00467600 | -0.40222700 | 1.93842600 | H | -3.61382100 | 0.24981100 | 2.27306000 | H | -3.42588700 | -1.44127700 | 1.79791400 | H | -1.49038900 | 1.54614800 | -0.37927000 |
| C                                                                                                                                                                                                                                                                                                                                                                                                                                                                                                                                                                                                                                                                                                                                                                                                                                                                                                                                                                                                                                                                                                                                                                                                                                                                                                                                                                                                                                                                                                                                                                                                                                                                                                                                                                                                                                                                                                                                                                                                                                                                                                                                                                                                                                                                                                                                                                                                                                                   | -0.01988700                                                                         | 0.33594200                                                                           | -0.31423000 |             |            |             |   |             |            |             |   |             |             |             |   |             |             |             |   |             |             |            |   |             |             |             |   |             |             |             |   |             |             |             |   |             |             |            |   |            |            |             |   |            |             |             |   |            |            |            |   |            |             |            |   |            |             |             |   |            |            |            |   |            |            |            |   |            |             |            |   |            |             |            |   |            |            |            |   |            |             |            |   |             |            |             |   |             |             |             |   |             |            |            |   |             |            |             |   |             |             |            |   |             |             |            |   |             |            |            |   |             |             |            |   |             |            |             |
| N                                                                                                                                                                                                                                                                                                                                                                                                                                                                                                                                                                                                                                                                                                                                                                                                                                                                                                                                                                                                                                                                                                                                                                                                                                                                                                                                                                                                                                                                                                                                                                                                                                                                                                                                                                                                                                                                                                                                                                                                                                                                                                                                                                                                                                                                                                                                                                                                                                                   | -0.47368800                                                                         | 1.53358600                                                                           | -0.26687900 |             |            |             |   |             |            |             |   |             |             |             |   |             |             |             |   |             |             |            |   |             |             |             |   |             |             |             |   |             |             |             |   |             |             |            |   |            |            |             |   |            |             |             |   |            |            |            |   |            |             |            |   |            |             |             |   |            |            |            |   |            |            |            |   |            |             |            |   |            |             |            |   |            |            |            |   |            |             |            |   |             |            |             |   |             |             |             |   |             |            |            |   |             |            |             |   |             |             |            |   |             |             |            |   |             |            |            |   |             |             |            |   |             |            |             |
| C                                                                                                                                                                                                                                                                                                                                                                                                                                                                                                                                                                                                                                                                                                                                                                                                                                                                                                                                                                                                                                                                                                                                                                                                                                                                                                                                                                                                                                                                                                                                                                                                                                                                                                                                                                                                                                                                                                                                                                                                                                                                                                                                                                                                                                                                                                                                                                                                                                                   | -0.87422700                                                                         | -0.90703000                                                                          | -0.54892500 |             |            |             |   |             |            |             |   |             |             |             |   |             |             |             |   |             |             |            |   |             |             |             |   |             |             |             |   |             |             |             |   |             |             |            |   |            |            |             |   |            |             |             |   |            |            |            |   |            |             |            |   |            |             |             |   |            |            |            |   |            |            |            |   |            |             |            |   |            |             |            |   |            |            |            |   |            |             |            |   |             |            |             |   |             |             |             |   |             |            |            |   |             |            |             |   |             |             |            |   |             |             |            |   |             |            |            |   |             |             |            |   |             |            |             |
| H                                                                                                                                                                                                                                                                                                                                                                                                                                                                                                                                                                                                                                                                                                                                                                                                                                                                                                                                                                                                                                                                                                                                                                                                                                                                                                                                                                                                                                                                                                                                                                                                                                                                                                                                                                                                                                                                                                                                                                                                                                                                                                                                                                                                                                                                                                                                                                                                                                                   | -0.42676200                                                                         | -1.47482800                                                                          | -1.37427100 |             |            |             |   |             |            |             |   |             |             |             |   |             |             |             |   |             |             |            |   |             |             |             |   |             |             |             |   |             |             |             |   |             |             |            |   |            |            |             |   |            |             |             |   |            |            |            |   |            |             |            |   |            |             |             |   |            |            |            |   |            |            |            |   |            |             |            |   |            |             |            |   |            |            |            |   |            |             |            |   |             |            |             |   |             |             |             |   |             |            |            |   |             |            |             |   |             |             |            |   |             |             |            |   |             |            |            |   |             |             |            |   |             |            |             |
| H                                                                                                                                                                                                                                                                                                                                                                                                                                                                                                                                                                                                                                                                                                                                                                                                                                                                                                                                                                                                                                                                                                                                                                                                                                                                                                                                                                                                                                                                                                                                                                                                                                                                                                                                                                                                                                                                                                                                                                                                                                                                                                                                                                                                                                                                                                                                                                                                                                                   | -0.78828100                                                                         | -1.55894500                                                                          | 0.33043800  |             |            |             |   |             |            |             |   |             |             |             |   |             |             |             |   |             |             |            |   |             |             |             |   |             |             |             |   |             |             |             |   |             |             |            |   |            |            |             |   |            |             |             |   |            |            |            |   |            |             |            |   |            |             |             |   |            |            |            |   |            |            |            |   |            |             |            |   |            |             |            |   |            |            |            |   |            |             |            |   |             |            |             |   |             |             |             |   |             |            |            |   |             |            |             |   |             |             |            |   |             |             |            |   |             |            |            |   |             |             |            |   |             |            |             |
| C                                                                                                                                                                                                                                                                                                                                                                                                                                                                                                                                                                                                                                                                                                                                                                                                                                                                                                                                                                                                                                                                                                                                                                                                                                                                                                                                                                                                                                                                                                                                                                                                                                                                                                                                                                                                                                                                                                                                                                                                                                                                                                                                                                                                                                                                                                                                                                                                                                                   | -2.35544300                                                                         | -0.66491000                                                                          | -0.88339300 |             |            |             |   |             |            |             |   |             |             |             |   |             |             |             |   |             |             |            |   |             |             |             |   |             |             |             |   |             |             |             |   |             |             |            |   |            |            |             |   |            |             |             |   |            |            |            |   |            |             |            |   |            |             |             |   |            |            |            |   |            |            |            |   |            |             |            |   |            |             |            |   |            |            |            |   |            |             |            |   |             |            |             |   |             |             |             |   |             |            |            |   |             |            |             |   |             |             |            |   |             |             |            |   |             |            |            |   |             |             |            |   |             |            |             |
| H                                                                                                                                                                                                                                                                                                                                                                                                                                                                                                                                                                                                                                                                                                                                                                                                                                                                                                                                                                                                                                                                                                                                                                                                                                                                                                                                                                                                                                                                                                                                                                                                                                                                                                                                                                                                                                                                                                                                                                                                                                                                                                                                                                                                                                                                                                                                                                                                                                                   | -2.78504200                                                                         | -1.65392500                                                                          | -1.13989800 |             |            |             |   |             |            |             |   |             |             |             |   |             |             |             |   |             |             |            |   |             |             |             |   |             |             |             |   |             |             |             |   |             |             |            |   |            |            |             |   |            |             |             |   |            |            |            |   |            |             |            |   |            |             |             |   |            |            |            |   |            |            |            |   |            |             |            |   |            |             |            |   |            |            |            |   |            |             |            |   |             |            |             |   |             |             |             |   |             |            |            |   |             |            |             |   |             |             |            |   |             |             |            |   |             |            |            |   |             |             |            |   |             |            |             |
| H                                                                                                                                                                                                                                                                                                                                                                                                                                                                                                                                                                                                                                                                                                                                                                                                                                                                                                                                                                                                                                                                                                                                                                                                                                                                                                                                                                                                                                                                                                                                                                                                                                                                                                                                                                                                                                                                                                                                                                                                                                                                                                                                                                                                                                                                                                                                                                                                                                                   | -2.42631200                                                                         | -0.08089200                                                                          | -1.81176600 |             |            |             |   |             |            |             |   |             |             |             |   |             |             |             |   |             |             |            |   |             |             |             |   |             |             |             |   |             |             |             |   |             |             |            |   |            |            |             |   |            |             |             |   |            |            |            |   |            |             |            |   |            |             |             |   |            |            |            |   |            |            |            |   |            |             |            |   |            |             |            |   |            |            |            |   |            |             |            |   |             |            |             |   |             |             |             |   |             |            |            |   |             |            |             |   |             |             |            |   |             |             |            |   |             |            |            |   |             |             |            |   |             |            |             |
| C                                                                                                                                                                                                                                                                                                                                                                                                                                                                                                                                                                                                                                                                                                                                                                                                                                                                                                                                                                                                                                                                                                                                                                                                                                                                                                                                                                                                                                                                                                                                                                                                                                                                                                                                                                                                                                                                                                                                                                                                                                                                                                                                                                                                                                                                                                                                                                                                                                                   | -3.21343600                                                                         | -0.02180900                                                                          | 0.17520900  |             |            |             |   |             |            |             |   |             |             |             |   |             |             |             |   |             |             |            |   |             |             |             |   |             |             |             |   |             |             |             |   |             |             |            |   |            |            |             |   |            |             |             |   |            |            |            |   |            |             |            |   |            |             |             |   |            |            |            |   |            |            |            |   |            |             |            |   |            |             |            |   |            |            |            |   |            |             |            |   |             |            |             |   |             |             |             |   |             |            |            |   |             |            |             |   |             |             |            |   |             |             |            |   |             |            |            |   |             |             |            |   |             |            |             |
| C                                                                                                                                                                                                                                                                                                                                                                                                                                                                                                                                                                                                                                                                                                                                                                                                                                                                                                                                                                                                                                                                                                                                                                                                                                                                                                                                                                                                                                                                                                                                                                                                                                                                                                                                                                                                                                                                                                                                                                                                                                                                                                                                                                                                                                                                                                                                                                                                                                                   | 1.45489900                                                                          | 0.13496200                                                                           | -0.12820200 |             |            |             |   |             |            |             |   |             |             |             |   |             |             |             |   |             |             |            |   |             |             |             |   |             |             |             |   |             |             |             |   |             |             |            |   |            |            |             |   |            |             |             |   |            |            |            |   |            |             |            |   |            |             |             |   |            |            |            |   |            |            |            |   |            |             |            |   |            |             |            |   |            |            |            |   |            |             |            |   |             |            |             |   |             |             |             |   |             |            |            |   |             |            |             |   |             |             |            |   |             |             |            |   |             |            |            |   |             |             |            |   |             |            |             |
| C                                                                                                                                                                                                                                                                                                                                                                                                                                                                                                                                                                                                                                                                                                                                                                                                                                                                                                                                                                                                                                                                                                                                                                                                                                                                                                                                                                                                                                                                                                                                                                                                                                                                                                                                                                                                                                                                                                                                                                                                                                                                                                                                                                                                                                                                                                                                                                                                                                                   | 2.04275200                                                                          | -1.14095500                                                                          | -0.10358200 |             |            |             |   |             |            |             |   |             |             |             |   |             |             |             |   |             |             |            |   |             |             |             |   |             |             |             |   |             |             |             |   |             |             |            |   |            |            |             |   |            |             |             |   |            |            |            |   |            |             |            |   |            |             |             |   |            |            |            |   |            |            |            |   |            |             |            |   |            |             |            |   |            |            |            |   |            |             |            |   |             |            |             |   |             |             |             |   |             |            |            |   |             |            |             |   |             |             |            |   |             |             |            |   |             |            |            |   |             |             |            |   |             |            |             |
| C                                                                                                                                                                                                                                                                                                                                                                                                                                                                                                                                                                                                                                                                                                                                                                                                                                                                                                                                                                                                                                                                                                                                                                                                                                                                                                                                                                                                                                                                                                                                                                                                                                                                                                                                                                                                                                                                                                                                                                                                                                                                                                                                                                                                                                                                                                                                                                                                                                                   | 2.28808900                                                                          | 1.25712400                                                                           | 0.03626800  |             |            |             |   |             |            |             |   |             |             |             |   |             |             |             |   |             |             |            |   |             |             |             |   |             |             |             |   |             |             |             |   |             |             |            |   |            |            |             |   |            |             |             |   |            |            |            |   |            |             |            |   |            |             |             |   |            |            |            |   |            |            |            |   |            |             |            |   |            |             |            |   |            |            |            |   |            |             |            |   |             |            |             |   |             |             |             |   |             |            |            |   |             |            |             |   |             |             |            |   |             |             |            |   |             |            |            |   |             |             |            |   |             |            |             |
| C                                                                                                                                                                                                                                                                                                                                                                                                                                                                                                                                                                                                                                                                                                                                                                                                                                                                                                                                                                                                                                                                                                                                                                                                                                                                                                                                                                                                                                                                                                                                                                                                                                                                                                                                                                                                                                                                                                                                                                                                                                                                                                                                                                                                                                                                                                                                                                                                                                                   | 3.42030800                                                                          | -1.29234100                                                                          | 0.08057200  |             |            |             |   |             |            |             |   |             |             |             |   |             |             |             |   |             |             |            |   |             |             |             |   |             |             |             |   |             |             |             |   |             |             |            |   |            |            |             |   |            |             |             |   |            |            |            |   |            |             |            |   |            |             |             |   |            |            |            |   |            |            |            |   |            |             |            |   |            |             |            |   |            |            |            |   |            |             |            |   |             |            |             |   |             |             |             |   |             |            |            |   |             |            |             |   |             |             |            |   |             |             |            |   |             |            |            |   |             |             |            |   |             |            |             |
| H                                                                                                                                                                                                                                                                                                                                                                                                                                                                                                                                                                                                                                                                                                                                                                                                                                                                                                                                                                                                                                                                                                                                                                                                                                                                                                                                                                                                                                                                                                                                                                                                                                                                                                                                                                                                                                                                                                                                                                                                                                                                                                                                                                                                                                                                                                                                                                                                                                                   | 1.43497500                                                                          | -2.03111500                                                                          | -0.22400500 |             |            |             |   |             |            |             |   |             |             |             |   |             |             |             |   |             |             |            |   |             |             |             |   |             |             |             |   |             |             |             |   |             |             |            |   |            |            |             |   |            |             |             |   |            |            |            |   |            |             |            |   |            |             |             |   |            |            |            |   |            |            |            |   |            |             |            |   |            |             |            |   |            |            |            |   |            |             |            |   |             |            |             |   |             |             |             |   |             |            |            |   |             |            |             |   |             |             |            |   |             |             |            |   |             |            |            |   |             |             |            |   |             |            |             |
| C                                                                                                                                                                                                                                                                                                                                                                                                                                                                                                                                                                                                                                                                                                                                                                                                                                                                                                                                                                                                                                                                                                                                                                                                                                                                                                                                                                                                                                                                                                                                                                                                                                                                                                                                                                                                                                                                                                                                                                                                                                                                                                                                                                                                                                                                                                                                                                                                                                                   | 3.66062900                                                                          | 1.10669300                                                                           | 0.21674900  |             |            |             |   |             |            |             |   |             |             |             |   |             |             |             |   |             |             |            |   |             |             |             |   |             |             |             |   |             |             |             |   |             |             |            |   |            |            |             |   |            |             |             |   |            |            |            |   |            |             |            |   |            |             |             |   |            |            |            |   |            |            |            |   |            |             |            |   |            |             |            |   |            |            |            |   |            |             |            |   |             |            |             |   |             |             |             |   |             |            |            |   |             |            |             |   |             |             |            |   |             |             |            |   |             |            |            |   |             |             |            |   |             |            |             |
| H                                                                                                                                                                                                                                                                                                                                                                                                                                                                                                                                                                                                                                                                                                                                                                                                                                                                                                                                                                                                                                                                                                                                                                                                                                                                                                                                                                                                                                                                                                                                                                                                                                                                                                                                                                                                                                                                                                                                                                                                                                                                                                                                                                                                                                                                                                                                                                                                                                                   | 1.83236300                                                                          | 2.24078700                                                                           | 0.01976800  |             |            |             |   |             |            |             |   |             |             |             |   |             |             |             |   |             |             |            |   |             |             |             |   |             |             |             |   |             |             |             |   |             |             |            |   |            |            |             |   |            |             |             |   |            |            |            |   |            |             |            |   |            |             |             |   |            |            |            |   |            |            |            |   |            |             |            |   |            |             |            |   |            |            |            |   |            |             |            |   |             |            |             |   |             |             |             |   |             |            |            |   |             |            |             |   |             |             |            |   |             |             |            |   |             |            |            |   |             |             |            |   |             |            |             |
| C                                                                                                                                                                                                                                                                                                                                                                                                                                                                                                                                                                                                                                                                                                                                                                                                                                                                                                                                                                                                                                                                                                                                                                                                                                                                                                                                                                                                                                                                                                                                                                                                                                                                                                                                                                                                                                                                                                                                                                                                                                                                                                                                                                                                                                                                                                                                                                                                                                                   | 4.23424700                                                                          | -0.17019600                                                                          | 0.24044700  |             |            |             |   |             |            |             |   |             |             |             |   |             |             |             |   |             |             |            |   |             |             |             |   |             |             |             |   |             |             |             |   |             |             |            |   |            |            |             |   |            |             |             |   |            |            |            |   |            |             |            |   |            |             |             |   |            |            |            |   |            |            |            |   |            |             |            |   |            |             |            |   |            |            |            |   |            |             |            |   |             |            |             |   |             |             |             |   |             |            |            |   |             |            |             |   |             |             |            |   |             |             |            |   |             |            |            |   |             |             |            |   |             |            |             |
| H                                                                                                                                                                                                                                                                                                                                                                                                                                                                                                                                                                                                                                                                                                                                                                                                                                                                                                                                                                                                                                                                                                                                                                                                                                                                                                                                                                                                                                                                                                                                                                                                                                                                                                                                                                                                                                                                                                                                                                                                                                                                                                                                                                                                                                                                                                                                                                                                                                                   | 3.85353000                                                                          | -2.28835300                                                                          | 0.09833200  |             |            |             |   |             |            |             |   |             |             |             |   |             |             |             |   |             |             |            |   |             |             |             |   |             |             |             |   |             |             |             |   |             |             |            |   |            |            |             |   |            |             |             |   |            |            |            |   |            |             |            |   |            |             |             |   |            |            |            |   |            |            |            |   |            |             |            |   |            |             |            |   |            |            |            |   |            |             |            |   |             |            |             |   |             |             |             |   |             |            |            |   |             |            |             |   |             |             |            |   |             |             |            |   |             |            |            |   |             |             |            |   |             |            |             |
| H                                                                                                                                                                                                                                                                                                                                                                                                                                                                                                                                                                                                                                                                                                                                                                                                                                                                                                                                                                                                                                                                                                                                                                                                                                                                                                                                                                                                                                                                                                                                                                                                                                                                                                                                                                                                                                                                                                                                                                                                                                                                                                                                                                                                                                                                                                                                                                                                                                                   | 4.28669700                                                                          | 1.98596900                                                                           | 0.34022700  |             |            |             |   |             |            |             |   |             |             |             |   |             |             |             |   |             |             |            |   |             |             |             |   |             |             |             |   |             |             |             |   |             |             |            |   |            |            |             |   |            |             |             |   |            |            |            |   |            |             |            |   |            |             |             |   |            |            |            |   |            |            |            |   |            |             |            |   |            |             |            |   |            |            |            |   |            |             |            |   |             |            |             |   |             |             |             |   |             |            |            |   |             |            |             |   |             |             |            |   |             |             |            |   |             |            |            |   |             |             |            |   |             |            |             |
| H                                                                                                                                                                                                                                                                                                                                                                                                                                                                                                                                                                                                                                                                                                                                                                                                                                                                                                                                                                                                                                                                                                                                                                                                                                                                                                                                                                                                                                                                                                                                                                                                                                                                                                                                                                                                                                                                                                                                                                                                                                                                                                                                                                                                                                                                                                                                                                                                                                                   | 5.30494200                                                                          | -0.28713000                                                                          | 0.38202300  |             |            |             |   |             |            |             |   |             |             |             |   |             |             |             |   |             |             |            |   |             |             |             |   |             |             |             |   |             |             |             |   |             |             |            |   |            |            |             |   |            |             |             |   |            |            |            |   |            |             |            |   |            |             |             |   |            |            |            |   |            |            |            |   |            |             |            |   |            |             |            |   |            |            |            |   |            |             |            |   |             |            |             |   |             |             |             |   |             |            |            |   |             |            |             |   |             |             |            |   |             |             |            |   |             |            |            |   |             |             |            |   |             |            |             |
| C                                                                                                                                                                                                                                                                                                                                                                                                                                                                                                                                                                                                                                                                                                                                                                                                                                                                                                                                                                                                                                                                                                                                                                                                                                                                                                                                                                                                                                                                                                                                                                                                                                                                                                                                                                                                                                                                                                                                                                                                                                                                                                                                                                                                                                                                                                                                                                                                                                                   | -4.54033500                                                                         | 0.52496400                                                                           | -0.25889800 |             |            |             |   |             |            |             |   |             |             |             |   |             |             |             |   |             |             |            |   |             |             |             |   |             |             |             |   |             |             |             |   |             |             |            |   |            |            |             |   |            |             |             |   |            |            |            |   |            |             |            |   |            |             |             |   |            |            |            |   |            |            |            |   |            |             |            |   |            |             |            |   |            |            |            |   |            |             |            |   |             |            |             |   |             |             |             |   |             |            |            |   |             |            |             |   |             |             |            |   |             |             |            |   |             |            |            |   |             |             |            |   |             |            |             |
| H                                                                                                                                                                                                                                                                                                                                                                                                                                                                                                                                                                                                                                                                                                                                                                                                                                                                                                                                                                                                                                                                                                                                                                                                                                                                                                                                                                                                                                                                                                                                                                                                                                                                                                                                                                                                                                                                                                                                                                                                                                                                                                                                                                                                                                                                                                                                                                                                                                                   | -5.29669300                                                                         | -0.27603100                                                                          | -0.36378500 |             |            |             |   |             |            |             |   |             |             |             |   |             |             |             |   |             |             |            |   |             |             |             |   |             |             |             |   |             |             |             |   |             |             |            |   |            |            |             |   |            |             |             |   |            |            |            |   |            |             |            |   |            |             |             |   |            |            |            |   |            |            |            |   |            |             |            |   |            |             |            |   |            |            |            |   |            |             |            |   |             |            |             |   |             |             |             |   |             |            |            |   |             |            |             |   |             |             |            |   |             |             |            |   |             |            |            |   |             |             |            |   |             |            |             |
| H                                                                                                                                                                                                                                                                                                                                                                                                                                                                                                                                                                                                                                                                                                                                                                                                                                                                                                                                                                                                                                                                                                                                                                                                                                                                                                                                                                                                                                                                                                                                                                                                                                                                                                                                                                                                                                                                                                                                                                                                                                                                                                                                                                                                                                                                                                                                                                                                                                                   | -4.94289200                                                                         | 1.23862300                                                                           | 0.46929900  |             |            |             |   |             |            |             |   |             |             |             |   |             |             |             |   |             |             |            |   |             |             |             |   |             |             |             |   |             |             |             |   |             |             |            |   |            |            |             |   |            |             |             |   |            |            |            |   |            |             |            |   |            |             |             |   |            |            |            |   |            |            |            |   |            |             |            |   |            |             |            |   |            |            |            |   |            |             |            |   |             |            |             |   |             |             |             |   |             |            |            |   |             |            |             |   |             |             |            |   |             |             |            |   |             |            |            |   |             |             |            |   |             |            |             |
| H                                                                                                                                                                                                                                                                                                                                                                                                                                                                                                                                                                                                                                                                                                                                                                                                                                                                                                                                                                                                                                                                                                                                                                                                                                                                                                                                                                                                                                                                                                                                                                                                                                                                                                                                                                                                                                                                                                                                                                                                                                                                                                                                                                                                                                                                                                                                                                                                                                                   | -4.47996900                                                                         | 1.02620500                                                                           | -1.23220700 |             |            |             |   |             |            |             |   |             |             |             |   |             |             |             |   |             |             |            |   |             |             |             |   |             |             |             |   |             |             |             |   |             |             |            |   |            |            |             |   |            |             |             |   |            |            |            |   |            |             |            |   |            |             |             |   |            |            |            |   |            |            |            |   |            |             |            |   |            |             |            |   |            |            |            |   |            |             |            |   |             |            |             |   |             |             |             |   |             |            |            |   |             |            |             |   |             |             |            |   |             |             |            |   |             |            |            |   |             |             |            |   |             |            |             |
| C                                                                                                                                                                                                                                                                                                                                                                                                                                                                                                                                                                                                                                                                                                                                                                                                                                                                                                                                                                                                                                                                                                                                                                                                                                                                                                                                                                                                                                                                                                                                                                                                                                                                                                                                                                                                                                                                                                                                                                                                                                                                                                                                                                                                                                                                                                                                                                                                                                                   | -3.05025700                                                                         | -0.41709800                                                                          | 1.61196300  |             |            |             |   |             |            |             |   |             |             |             |   |             |             |             |   |             |             |            |   |             |             |             |   |             |             |             |   |             |             |             |   |             |             |            |   |            |            |             |   |            |             |             |   |            |            |            |   |            |             |            |   |            |             |             |   |            |            |            |   |            |            |            |   |            |             |            |   |            |             |            |   |            |            |            |   |            |             |            |   |             |            |             |   |             |             |             |   |             |            |            |   |             |            |             |   |             |             |            |   |             |             |            |   |             |            |            |   |             |             |            |   |             |            |             |
| H                                                                                                                                                                                                                                                                                                                                                                                                                                                                                                                                                                                                                                                                                                                                                                                                                                                                                                                                                                                                                                                                                                                                                                                                                                                                                                                                                                                                                                                                                                                                                                                                                                                                                                                                                                                                                                                                                                                                                                                                                                                                                                                                                                                                                                                                                                                                                                                                                                                   | -2.00467600                                                                         | -0.40222700                                                                          | 1.93842600  |             |            |             |   |             |            |             |   |             |             |             |   |             |             |             |   |             |             |            |   |             |             |             |   |             |             |             |   |             |             |             |   |             |             |            |   |            |            |             |   |            |             |             |   |            |            |            |   |            |             |            |   |            |             |             |   |            |            |            |   |            |            |            |   |            |             |            |   |            |             |            |   |            |            |            |   |            |             |            |   |             |            |             |   |             |             |             |   |             |            |            |   |             |            |             |   |             |             |            |   |             |             |            |   |             |            |            |   |             |             |            |   |             |            |             |
| H                                                                                                                                                                                                                                                                                                                                                                                                                                                                                                                                                                                                                                                                                                                                                                                                                                                                                                                                                                                                                                                                                                                                                                                                                                                                                                                                                                                                                                                                                                                                                                                                                                                                                                                                                                                                                                                                                                                                                                                                                                                                                                                                                                                                                                                                                                                                                                                                                                                   | -3.61382100                                                                         | 0.24981100                                                                           | 2.27306000  |             |            |             |   |             |            |             |   |             |             |             |   |             |             |             |   |             |             |            |   |             |             |             |   |             |             |             |   |             |             |             |   |             |             |            |   |            |            |             |   |            |             |             |   |            |            |            |   |            |             |            |   |            |             |             |   |            |            |            |   |            |            |            |   |            |             |            |   |            |             |            |   |            |            |            |   |            |             |            |   |             |            |             |   |             |             |             |   |             |            |            |   |             |            |             |   |             |             |            |   |             |             |            |   |             |            |            |   |             |             |            |   |             |            |             |
| H                                                                                                                                                                                                                                                                                                                                                                                                                                                                                                                                                                                                                                                                                                                                                                                                                                                                                                                                                                                                                                                                                                                                                                                                                                                                                                                                                                                                                                                                                                                                                                                                                                                                                                                                                                                                                                                                                                                                                                                                                                                                                                                                                                                                                                                                                                                                                                                                                                                   | -3.42588700                                                                         | -1.44127700                                                                          | 1.79791400  |             |            |             |   |             |            |             |   |             |             |             |   |             |             |             |   |             |             |            |   |             |             |             |   |             |             |             |   |             |             |             |   |             |             |            |   |            |            |             |   |            |             |             |   |            |            |            |   |            |             |            |   |            |             |             |   |            |            |            |   |            |            |            |   |            |             |            |   |            |             |            |   |            |            |            |   |            |             |            |   |             |            |             |   |             |             |             |   |             |            |            |   |             |            |             |   |             |             |            |   |             |             |            |   |             |            |            |   |             |             |            |   |             |            |             |
| H                                                                                                                                                                                                                                                                                                                                                                                                                                                                                                                                                                                                                                                                                                                                                                                                                                                                                                                                                                                                                                                                                                                                                                                                                                                                                                                                                                                                                                                                                                                                                                                                                                                                                                                                                                                                                                                                                                                                                                                                                                                                                                                                                                                                                                                                                                                                                                                                                                                   | -1.49038900                                                                         | 1.54614800                                                                           | -0.37927000 |             |            |             |   |             |            |             |   |             |             |             |   |             |             |             |   |             |             |            |   |             |             |             |   |             |             |             |   |             |             |             |   |             |             |            |   |            |            |             |   |            |             |             |   |            |            |            |   |            |             |            |   |            |             |             |   |            |            |            |   |            |            |            |   |            |             |            |   |            |             |            |   |            |            |            |   |            |             |            |   |             |            |             |   |             |             |             |   |             |            |            |   |             |            |             |   |             |             |            |   |             |             |            |   |             |            |            |   |             |             |            |   |             |            |             |
| 13                                                                                                                                                                                                                                                                                                                                                                                                                                                                                                                                                                                                                                                                                                                                                                                                                                                                                                                                                                                                                                                                                                                                                                                                                                                                                                                                                                                                                                                                                                                                                                                                                                                                                                                                                                                                                                                                                                                                                                                                                                                                                                                                                                                                                                                                                                                                                                                                                                                  |  |  |             |             |            |             |   |             |            |             |   |             |             |             |   |             |             |             |   |             |             |            |   |             |             |             |   |             |             |             |   |             |             |             |   |             |             |            |   |            |            |             |   |            |             |             |   |            |            |            |   |            |             |            |   |            |             |             |   |            |            |            |   |            |            |            |   |            |             |            |   |            |             |            |   |            |            |            |   |            |             |            |   |             |            |             |   |             |             |             |   |             |            |            |   |             |            |             |   |             |             |            |   |             |             |            |   |             |            |            |   |             |             |            |   |             |            |             |
| <p>Cartesian Coordinates</p>                                                                                                                                                                                                                                                                                                                                                                                                                                                                                                                                                                                                                                                                                                                                                                                                                                                                                                                                                                                                                                                                                                                                                                                                                                                                                                                                                                                                                                                                                                                                                                                                                                                                                                                                                                                                                                                                                                                                                                                                                                                                                                                                                                                                                                                                                                                                                                                                                        |                                                                                     |                                                                                      |             |             |            |             |   |             |            |             |   |             |             |             |   |             |             |             |   |             |             |            |   |             |             |             |   |             |             |             |   |             |             |             |   |             |             |            |   |            |            |             |   |            |             |             |   |            |            |            |   |            |             |            |   |            |             |             |   |            |            |            |   |            |            |            |   |            |             |            |   |            |             |            |   |            |            |            |   |            |             |            |   |             |            |             |   |             |             |             |   |             |            |            |   |             |            |             |   |             |             |            |   |             |             |            |   |             |            |            |   |             |             |            |   |             |            |             |

| No.                   | Species                                                                             | Optimized Structure                                                                  |
|-----------------------|-------------------------------------------------------------------------------------|--------------------------------------------------------------------------------------|
| C                     | 0.75245700 -0.22014500 -0.36600400                                                  |                                                                                      |
| N                     | 1.07119800 -1.41169900 -0.76150800                                                  |                                                                                      |
| C                     | 1.73024700 0.92666900 -0.20254000                                                   |                                                                                      |
| H                     | 1.51127400 1.63748300 -1.01417800                                                   |                                                                                      |
| H                     | 1.48024800 1.44322400 0.73264500                                                    |                                                                                      |
| C                     | 3.22308500 0.56242800 -0.22386500                                                   |                                                                                      |
| H                     | 3.77653400 1.50728600 -0.22761200                                                   |                                                                                      |
| H                     | 3.48284700 0.07724600 -1.17432000                                                   |                                                                                      |
| C                     | 3.68181700 -0.29006800 0.96580900                                                   |                                                                                      |
| H                     | 3.18536700 -1.26725600 1.00048900                                                   |                                                                                      |
| C                     | -0.68323700 -0.05283100 -0.11627300                                                 |                                                                                      |
| C                     | -1.29833000 1.22503000 -0.12552500                                                  |                                                                                      |
| C                     | -1.49059400 -1.22814300 0.08111600                                                  |                                                                                      |
| C                     | -2.66229400 1.32690700 0.06666500                                                   |                                                                                      |
| H                     | -0.70761700 2.11861600 -0.29106700                                                  |                                                                                      |
| C                     | -2.85779200 -1.11216300 0.26862200                                                  |                                                                                      |
| H                     | -0.99578000 -2.19117300 0.12737600                                                  |                                                                                      |
| C                     | -3.44820700 0.15797500 0.26210600                                                   |                                                                                      |
| H                     | -3.14288300 2.29970800 0.06717000                                                   |                                                                                      |
| H                     | -3.46337400 -1.99579100 0.43827300                                                  |                                                                                      |
| H                     | -4.51825600 0.25899300 0.41763000                                                   |                                                                                      |
| H                     | 4.75810700 -0.47431200 0.91244600                                                   |                                                                                      |
| H                     | 3.47961600 0.21734600 1.91515700                                                    |                                                                                      |
| H                     | 1.97261600 -1.52342600 -1.23411400                                                  |                                                                                      |
| 14                    | 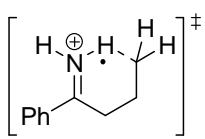 |  |
| Cartesian Coordinates |                                                                                     |                                                                                      |
| C                     | 0.79567300 0.12210200 -0.23517200                                                   |                                                                                      |
| N                     | 1.31392100 1.17918000 -0.73200200                                                   |                                                                                      |
| C                     | 1.70202600 -1.04935500 0.10352700                                                   |                                                                                      |
| H                     | 1.16148000 -1.73510600 0.75805100                                                   |                                                                                      |
| H                     | 1.90508400 -1.57899500 -0.83830100                                                  |                                                                                      |
| C                     | 3.02109100 -0.58986700 0.75393600                                                   |                                                                                      |
| H                     | 3.63141300 -1.48566900 0.93300300                                                   |                                                                                      |
| H                     | 2.81053900 -0.15660000 1.73788600                                                   |                                                                                      |
| C                     | 3.79198200 0.39245000 -0.10644600                                                   |                                                                                      |
| H                     | 3.04089600 1.18612800 -0.45611900                                                   |                                                                                      |
| C                     | -0.67438600 0.05012700 -0.08566400                                                  |                                                                                      |
| C                     | -1.34431700 -1.16305400 -0.34518600                                                 |                                                                                      |

| No.                   | Species                                                                           | Optimized Structure |  |  |                                                                                    |
|-----------------------|-----------------------------------------------------------------------------------|---------------------|--|--|------------------------------------------------------------------------------------|
| C                     | -1.40982900 1.20172900 0.27862500                                                 |                     |  |  |                                                                                    |
| C                     | -2.72877500 -1.22035000 -0.22909500                                               |                     |  |  |                                                                                    |
| H                     | -0.79145200 -2.04742000 -0.64340100                                               |                     |  |  |                                                                                    |
| C                     | -2.79261000 1.12627100 0.40840400                                                 |                     |  |  |                                                                                    |
| H                     | -0.89866600 2.12856600 0.52090800                                                 |                     |  |  |                                                                                    |
| C                     | -3.45346300 -0.07878700 0.14564900                                                |                     |  |  |                                                                                    |
| H                     | -3.24667700 -2.15379200 -0.42326000                                               |                     |  |  |                                                                                    |
| H                     | -3.35408800 2.00089000 0.71945500                                                 |                     |  |  |                                                                                    |
| H                     | -4.53338600 -0.13401400 0.23981600                                                |                     |  |  |                                                                                    |
| H                     | 4.57218700 0.94049500 0.42842300                                                  |                     |  |  |                                                                                    |
| H                     | 4.18331100 -0.04020900 -1.03212200                                                |                     |  |  |                                                                                    |
| H                     | 0.87756100 2.07386700 -0.95179800                                                 |                     |  |  |                                                                                    |
| 15                    | 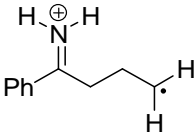 |                     |  |  |  |
| Cartesian Coordinates |                                                                                   |                     |  |  |                                                                                    |
| C                     | 0.76374100 0.24244800 -0.08302200                                                 |                     |  |  |                                                                                    |
| N                     | 1.30353700 1.41173300 -0.32555300                                                 |                     |  |  |                                                                                    |
| C                     | 1.69364200 -0.93109500 0.11226300                                                 |                     |  |  |                                                                                    |
| H                     | 1.21661500 -1.63097500 0.80150600                                                 |                     |  |  |                                                                                    |
| H                     | 1.75934200 -1.44917800 -0.85687600                                                |                     |  |  |                                                                                    |
| C                     | 3.11530600 -0.59998200 0.62007200                                                 |                     |  |  |                                                                                    |
| H                     | 3.58884400 -1.57067800 0.84737600                                                 |                     |  |  |                                                                                    |
| H                     | 3.05435500 -0.08271700 1.58581500                                                 |                     |  |  |                                                                                    |
| C                     | 3.98903200 0.15265600 -0.33165400                                                 |                     |  |  |                                                                                    |
| C                     | -0.68456800 0.09451500 -0.02404700                                                |                     |  |  |                                                                                    |
| C                     | -1.27054400 -1.17675800 -0.21684300                                               |                     |  |  |                                                                                    |
| C                     | -1.52512800 1.20865400 0.20952200                                                 |                     |  |  |                                                                                    |
| C                     | -2.65420100 -1.32026600 -0.20775800                                               |                     |  |  |                                                                                    |
| H                     | -0.65197600 -2.04700900 -0.40505100                                               |                     |  |  |                                                                                    |
| C                     | -2.90488700 1.05343400 0.23799000                                                 |                     |  |  |                                                                                    |
| H                     | -1.10890900 2.18860700 0.42517300                                                 |                     |  |  |                                                                                    |
| C                     | -3.47204600 -0.20910400 0.02091200                                                |                     |  |  |                                                                                    |
| H                     | -3.09522800 -2.29703300 -0.37560400                                               |                     |  |  |                                                                                    |
| H                     | -3.54030400 1.90927300 0.43955000                                                 |                     |  |  |                                                                                    |
| H                     | -4.55100600 -0.32632100 0.04021200                                                |                     |  |  |                                                                                    |
| H                     | 4.84494200 0.70360100 0.04565400                                                  |                     |  |  |                                                                                    |
| H                     | 3.98819400 -0.09842200 -1.39029700                                                |                     |  |  |                                                                                    |
| H                     | 0.74518300 2.22994400 -0.53980800                                                 |                     |  |  |                                                                                    |
| H                     | 2.32311300 1.50177000 -0.36338300                                                 |                     |  |  |                                                                                    |



| No.                   | Species     | Optimized Structure |             |
|-----------------------|-------------|---------------------|-------------|
| 16                    |             |                     |             |
| Cartesian Coordinates |             |                     |             |
| C                     | -0.24277200 | -0.13855800         | 0.43164800  |
| N                     | -0.59758400 | -1.30107900         | 0.88093600  |
| C                     | -1.17858100 | 1.04127900          | 0.25841300  |
| H                     | -0.86690300 | 1.79359400          | 0.99892500  |
| H                     | -0.97317800 | 1.48062000          | -0.72614300 |
| C                     | -2.67966600 | 0.75741300          | 0.41268400  |
| H                     | -3.18880300 | 1.72765900          | 0.38417900  |
| H                     | -2.89167300 | 0.35460000          | 1.41339100  |
| C                     | -3.27570300 | -0.15379500         | -0.67176700 |
| C                     | 1.18769100  | -0.04005300         | 0.12426300  |
| C                     | 1.85228500  | 1.21089300          | 0.05897100  |
| C                     | 1.94040000  | -1.25304300         | -0.05384800 |
| C                     | 3.21128300  | 1.25023500          | -0.18613500 |
| H                     | 1.30408800  | 2.13369700          | 0.20923600  |
| C                     | 3.30341400  | -1.19966400         | -0.29430400 |
| H                     | 1.40775700  | -2.19677400         | -0.04338600 |
| C                     | 3.94299900  | 0.04456500          | -0.36076900 |
| H                     | 3.72848100  | 2.20232000          | -0.24367300 |
| H                     | 3.86722300  | -2.11325600         | -0.44859600 |
| H                     | 5.00976300  | 0.09562300          | -0.55762900 |
| H                     | -3.05700700 | 0.27513800          | -1.65872100 |
| C                     | -4.78768800 | -0.34675200         | -0.51781400 |
| H                     | -5.03865100 | -0.80005100         | 0.44767700  |
| H                     | -5.31562600 | 0.61084400          | -0.58429800 |
| H                     | -5.18106100 | -0.99781000         | -1.30350100 |
| H                     | -2.78192300 | -1.13747900         | -0.65697500 |
| H                     | -1.48136500 | -1.35629500         | 1.39490300  |
| 17                    |             |                     |             |
| Cartesian Coordinates |             |                     |             |
| C                     | 0.27736900  | 0.13679400          | -0.13533200 |
| N                     | 0.88198100  | 1.26577300          | -0.41100200 |

| No.                   | Species                                                                             | Optimized Structure                                                                  |  |
|-----------------------|-------------------------------------------------------------------------------------|--------------------------------------------------------------------------------------|--|
| C                     | 1.14412000 -1.08398000 0.05749600                                                   |                                                                                      |  |
| H                     | 0.63058700 -1.76369600 0.74010400                                                   |                                                                                      |  |
| H                     | 1.19070500 -1.59858100 -0.91475200                                                  |                                                                                      |  |
| C                     | 2.57715000 -0.82287600 0.57346200                                                   |                                                                                      |  |
| H                     | 3.00192400 -1.81488100 0.80640400                                                   |                                                                                      |  |
| H                     | 2.53305000 -0.30144600 1.53960900                                                   |                                                                                      |  |
| C                     | 3.49639600 -0.10252600 -0.37041700                                                  |                                                                                      |  |
| C                     | -1.17574900 0.07699300 -0.03993800                                                  |                                                                                      |  |
| C                     | -1.84122500 -1.15785600 -0.20794900                                                 |                                                                                      |  |
| C                     | -1.94185900 1.24127000 0.20303900                                                   |                                                                                      |  |
| C                     | -3.23053100 -1.21779400 -0.16500600                                                 |                                                                                      |  |
| H                     | -1.28041600 -2.06494200 -0.40331500                                                 |                                                                                      |  |
| C                     | -3.32750300 1.16953400 0.26620400                                                   |                                                                                      |  |
| H                     | -1.46176600 2.19586400 0.39881500                                                   |                                                                                      |  |
| C                     | -3.97452200 -0.05805100 0.07387300                                                  |                                                                                      |  |
| H                     | -3.73322800 -2.16739700 -0.31447900                                                 |                                                                                      |  |
| H                     | -3.90529600 2.06356800 0.47532600                                                   |                                                                                      |  |
| H                     | -5.05777800 -0.11004800 0.11990900                                                  |                                                                                      |  |
| H                     | 3.41652400 -0.35149900 -1.43033800                                                  |                                                                                      |  |
| H                     | 0.37162100 2.11519300 -0.62347400                                                   |                                                                                      |  |
| H                     | 1.90777200 1.28341600 -0.46476300                                                   |                                                                                      |  |
| C                     | 4.79067400 0.46188200 0.11358400                                                    |                                                                                      |  |
| H                     | 5.22871600 1.15533700 -0.61029800                                                   |                                                                                      |  |
| H                     | 4.68372400 0.97731500 1.07507000                                                    |                                                                                      |  |
| H                     | 5.53407600 -0.33894900 0.26909700                                                   |                                                                                      |  |
| 18                    | 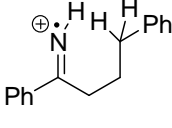 |  |  |
| Cartesian Coordinates |                                                                                     |                                                                                      |  |
| C                     | -1.52257600 0.42295200 0.53113800                                                   |                                                                                      |  |
| N                     | -1.13112900 1.64814600 0.40632500                                                   |                                                                                      |  |
| C                     | -0.66509800 -0.70854600 1.08015100                                                  |                                                                                      |  |
| H                     | -1.00697300 -0.91514800 2.10454400                                                  |                                                                                      |  |
| H                     | -0.87150300 -1.61745500 0.50386100                                                  |                                                                                      |  |
| C                     | 0.85220700 -0.46772500 1.11603400                                                   |                                                                                      |  |
| H                     | 1.31463700 -1.32825100 1.61037000                                                   |                                                                                      |  |
| H                     | 1.09507900 0.39900500 1.74296800                                                    |                                                                                      |  |
| C                     | 1.47116900 -0.30388400 -0.29619900                                                  |                                                                                      |  |
| C                     | -2.91804900 0.14434300 0.12293300                                                   |                                                                                      |  |
| C                     | -3.57529000 -1.05663500 0.46925600                                                  |                                                                                      |  |

| No.                   | Species                                                                             | Optimized Structure |  |  |                                                                                      |
|-----------------------|-------------------------------------------------------------------------------------|---------------------|--|--|--------------------------------------------------------------------------------------|
| C                     | -3.63369500 1.13765700 -0.61164200                                                  |                     |  |  |                                                                                      |
| C                     | -4.89533900 -1.26190700 0.09495800                                                  |                     |  |  |                                                                                      |
| H                     | -3.06327000 -1.82086200 1.04254400                                                  |                     |  |  |                                                                                      |
| C                     | -4.95104400 0.92381300 -0.98898600                                                  |                     |  |  |                                                                                      |
| H                     | -3.11662200 2.05271100 -0.87484300                                                  |                     |  |  |                                                                                      |
| C                     | -5.58868400 -0.27279500 -0.63851600                                                 |                     |  |  |                                                                                      |
| H                     | -5.40106000 -2.18228800 0.36808300                                                  |                     |  |  |                                                                                      |
| H                     | -5.48391400 1.67971500 -1.55604500                                                  |                     |  |  |                                                                                      |
| H                     | -6.62044700 -0.44566100 -0.92883000                                                 |                     |  |  |                                                                                      |
| H                     | 1.19199500 -1.16494400 -0.91256700                                                  |                     |  |  |                                                                                      |
| C                     | 2.96259900 -0.14883000 -0.29144200                                                  |                     |  |  |                                                                                      |
| C                     | 3.79721300 -1.14911200 -0.84942300                                                  |                     |  |  |                                                                                      |
| C                     | 3.56948600 1.00510300 0.27608300                                                    |                     |  |  |                                                                                      |
| C                     | 5.17638600 -1.01458500 -0.82623300                                                  |                     |  |  |                                                                                      |
| H                     | 3.34421600 -2.02988400 -1.29484200                                                  |                     |  |  |                                                                                      |
| C                     | 4.94691400 1.14409300 0.29708100                                                    |                     |  |  |                                                                                      |
| H                     | 2.94336900 1.79172000 0.68737500                                                    |                     |  |  |                                                                                      |
| C                     | 5.76056700 0.13349500 -0.25253500                                                   |                     |  |  |                                                                                      |
| H                     | 5.80888200 -1.78760800 -1.25027600                                                  |                     |  |  |                                                                                      |
| H                     | 5.40193400 2.03022300 0.72722400                                                    |                     |  |  |                                                                                      |
| H                     | 6.84057300 0.24215500 -0.24070700                                                   |                     |  |  |                                                                                      |
| H                     | 1.02415800 0.58427800 -0.77346100                                                   |                     |  |  |                                                                                      |
| H                     | -0.20375300 1.81065000 0.80436800                                                   |                     |  |  |                                                                                      |
| 19                    | 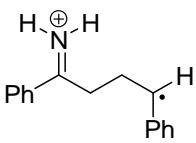 |                     |  |  |  |
| Cartesian Coordinates |                                                                                     |                     |  |  |                                                                                      |
| C                     | 1.30205100 0.22657700 -0.17223500                                                   |                     |  |  |                                                                                      |
| N                     | 0.46065400 -0.65913100 -0.64499500                                                  |                     |  |  |                                                                                      |
| C                     | 0.74740100 1.56579700 0.24755200                                                    |                     |  |  |                                                                                      |
| H                     | 1.40469600 1.98608400 1.01112300                                                    |                     |  |  |                                                                                      |
| H                     | 0.81986200 2.23173000 -0.62595400                                                   |                     |  |  |                                                                                      |
| C                     | -0.71213000 1.56106700 0.77194700                                                   |                     |  |  |                                                                                      |
| H                     | -0.88511700 2.57005100 1.17626200                                                   |                     |  |  |                                                                                      |
| H                     | -0.77945500 0.88443200 1.62985000                                                   |                     |  |  |                                                                                      |
| C                     | -1.74968700 1.24968000 -0.26859100                                                  |                     |  |  |                                                                                      |
| C                     | 2.72420500 -0.08487900 -0.07854800                                                  |                     |  |  |                                                                                      |
| C                     | 3.67290800 0.96068100 -0.04109700                                                   |                     |  |  |                                                                                      |
| C                     | 3.17809400 -1.42401000 -0.04346200                                                  |                     |  |  |                                                                                      |
| C                     | 5.03375000 0.67253100 -0.00173000                                                   |                     |  |  |                                                                                      |

| No.                   | Species                                                                             | Optimized Structure                                                                  |  |  |
|-----------------------|-------------------------------------------------------------------------------------|--------------------------------------------------------------------------------------|--|--|
| H                     | 3.35345500 1.99614300 -0.07520300                                                   |                                                                                      |  |  |
| C                     | 4.53743000 -1.70357300 0.01738400                                                   |                                                                                      |  |  |
| H                     | 2.47493500 -2.25140400 -0.00786600                                                  |                                                                                      |  |  |
| C                     | 5.46771200 -0.65630900 0.02971900                                                   |                                                                                      |  |  |
| H                     | 5.75525600 1.48258300 0.00719600                                                    |                                                                                      |  |  |
| H                     | 4.87505000 -2.73339700 0.06630100                                                   |                                                                                      |  |  |
| H                     | 6.52941400 -0.87798500 0.07341700                                                   |                                                                                      |  |  |
| H                     | 0.76901200 -1.55476900 -1.00509300                                                  |                                                                                      |  |  |
| H                     | -0.53937400 -0.43464800 -0.68726800                                                 |                                                                                      |  |  |
| C                     | -2.91733200 0.46223600 -0.09049900                                                  |                                                                                      |  |  |
| C                     | -3.23095200 -0.23093800 1.11933400                                                  |                                                                                      |  |  |
| C                     | -3.84316000 0.33787600 -1.17409700                                                  |                                                                                      |  |  |
| C                     | -4.38647200 -0.99278500 1.22520600                                                  |                                                                                      |  |  |
| H                     | -2.57445300 -0.15211500 1.97984800                                                  |                                                                                      |  |  |
| C                     | -4.99331400 -0.42606000 -1.05484000                                                 |                                                                                      |  |  |
| H                     | -3.63723100 0.86494900 -2.10208100                                                  |                                                                                      |  |  |
| C                     | -5.27451000 -1.10011500 0.14411200                                                  |                                                                                      |  |  |
| H                     | -4.60769500 -1.50291500 2.15780700                                                  |                                                                                      |  |  |
| H                     | -5.68139500 -0.49793000 -1.89145700                                                 |                                                                                      |  |  |
| H                     | -6.17697700 -1.69545600 0.23731400                                                  |                                                                                      |  |  |
| H                     | -1.66051300 1.79190400 -1.21016600                                                  |                                                                                      |  |  |
| 20                    | 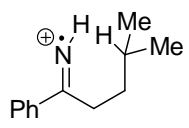 |  |  |  |
| Cartesian Coordinates |                                                                                     |                                                                                      |  |  |
| C                     | 0.05280500 0.24575900 -0.55736200                                                   |                                                                                      |  |  |
| N                     | -0.28199500 1.47111300 -0.81817700                                                  |                                                                                      |  |  |
| C                     | -0.89306700 -0.93602700 -0.64219900                                                 |                                                                                      |  |  |
| H                     | -0.55201300 -1.54102500 -1.49636600                                                 |                                                                                      |  |  |
| H                     | -0.72980700 -1.55363100 0.24802700                                                  |                                                                                      |  |  |
| C                     | -2.38285100 -0.60811900 -0.82127000                                                 |                                                                                      |  |  |
| H                     | -2.90450400 -1.56538600 -0.94340300                                                 |                                                                                      |  |  |
| H                     | -2.53269400 -0.07734000 -1.77194000                                                 |                                                                                      |  |  |
| C                     | -3.05250400 0.17914600 0.32663700                                                   |                                                                                      |  |  |
| C                     | 1.46254400 0.08236800 -0.19211300                                                   |                                                                                      |  |  |
| C                     | 2.11814600 -1.17107800 -0.29133400                                                  |                                                                                      |  |  |
| C                     | 2.20737600 1.24055600 0.21921600                                                    |                                                                                      |  |  |
| C                     | 3.46133700 -1.26628000 0.01920600                                                   |                                                                                      |  |  |
| H                     | 1.57658900 -2.05125100 -0.61821900                                                  |                                                                                      |  |  |
| C                     | 3.55453700 1.13238900 0.52274700                                                    |                                                                                      |  |  |

| No.                   | Species                                                                           | Optimized Structure                                                                 |  |  |
|-----------------------|-----------------------------------------------------------------------------------|-------------------------------------------------------------------------------------|--|--|
| H                     | 1.67990400 2.18057200 0.33181700                                                  |                                                                                     |  |  |
| C                     | 4.18541900 -0.11425800 0.42437200                                                 |                                                                                     |  |  |
| H                     | 3.97062300 -2.22195400 -0.04814300                                                |                                                                                     |  |  |
| H                     | 4.11176300 2.00251600 0.85252600                                                  |                                                                                     |  |  |
| H                     | 5.23913300 -0.20887400 0.66938100                                                 |                                                                                     |  |  |
| C                     | -4.50278600 0.51931800 -0.04715800                                                |                                                                                     |  |  |
| H                     | -4.55996400 1.08071900 -0.98621800                                                |                                                                                     |  |  |
| H                     | -5.09862700 -0.39353000 -0.16687200                                               |                                                                                     |  |  |
| H                     | -4.97608000 1.12311300 0.73276500                                                 |                                                                                     |  |  |
| H                     | -2.51228100 1.13478500 0.45258100                                                 |                                                                                     |  |  |
| C                     | -2.98817100 -0.56426500 1.66947900                                                |                                                                                     |  |  |
| H                     | -1.96213400 -0.73544900 2.01359600                                                |                                                                                     |  |  |
| H                     | -3.49610100 0.00926800 2.45039200                                                 |                                                                                     |  |  |
| H                     | -3.48717100 -1.53876200 1.59857800                                                |                                                                                     |  |  |
| H                     | -1.12939100 1.62138300 -1.37258600                                                |                                                                                     |  |  |
| 21                    | 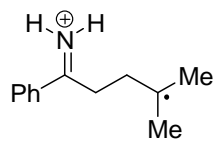 |  |  |  |
| Cartesian Coordinates |                                                                                   |                                                                                     |  |  |
| C                     | 0.02605900 0.13201100 0.07045200                                                  |                                                                                     |  |  |
| N                     | -0.58634000 1.21101000 0.49156300                                                 |                                                                                     |  |  |
| C                     | -0.84056900 -1.03560100 -0.32828400                                               |                                                                                     |  |  |
| H                     | -0.29382400 -1.64233400 -1.05208700                                               |                                                                                     |  |  |
| H                     | -0.96610100 -1.66231800 0.56658900                                                |                                                                                     |  |  |
| C                     | -2.22498600 -0.67234100 -0.92366700                                               |                                                                                     |  |  |
| H                     | -2.65666900 -1.62672000 -1.27204500                                               |                                                                                     |  |  |
| H                     | -2.07251800 -0.07411900 -1.82999600                                               |                                                                                     |  |  |
| C                     | -3.22146100 0.01416900 -0.01693400                                                |                                                                                     |  |  |
| C                     | 1.48205900 0.07674400 0.01745200                                                  |                                                                                     |  |  |
| C                     | 2.14021300 -1.17315700 0.02039900                                                 |                                                                                     |  |  |
| C                     | 2.25763400 1.25925300 -0.01803800                                                 |                                                                                     |  |  |
| C                     | 3.53030400 -1.23449300 0.01836800                                                 |                                                                                     |  |  |
| H                     | 1.57203900 -2.09579600 0.05639700                                                 |                                                                                     |  |  |
| C                     | 3.64461400 1.18970900 -0.04042300                                                 |                                                                                     |  |  |
| H                     | 1.78515300 2.23531900 -0.08264700                                                 |                                                                                     |  |  |
| C                     | 4.28347200 -0.05683000 -0.01395800                                                |                                                                                     |  |  |
| H                     | 4.02645800 -2.19897300 0.03932200                                                 |                                                                                     |  |  |
| H                     | 4.23022500 2.10161300 -0.08929800                                                 |                                                                                     |  |  |
| H                     | 5.36765200 -0.10804300 -0.02784600                                                |                                                                                     |  |  |
| H                     | -0.08314000 2.01989600 0.83737600                                                 |                                                                                     |  |  |

| No. | Species     | Optimized Structure |             |  |
|-----|-------------|---------------------|-------------|--|
| H   | -1.61585200 | 1.23389000          | 0.47684400  |  |
| C   | -4.27351100 | 0.85802300          | -0.67504900 |  |
| H   | -4.76858300 | 1.52219000          | 0.04085700  |  |
| H   | -3.87298600 | 1.46264400          | -1.49605700 |  |
| H   | -5.06662400 | 0.22463900          | -1.11003100 |  |
| C   | -3.55367000 | -0.60858100         | 1.30897600  |  |
| H   | -4.20331800 | -1.49042000         | 1.17066700  |  |
| H   | -2.67459000 | -0.95724800         | 1.86327600  |  |
| H   | -4.10388300 | 0.08526300          | 1.95198000  |  |

## 7.4 Bond Dissociation Enthalpies

### DFT Methods:

Structure optimization: (RO)B3P86/6-311G(d,p)

Frequency calculations: (RO)B3P86/6-311G(d,p) scaled by a factor of 0.9806

| No. | Reactions                                                                            | Kcal mol <sup>-1</sup> |
|-----|--------------------------------------------------------------------------------------|------------------------|
| 1   | 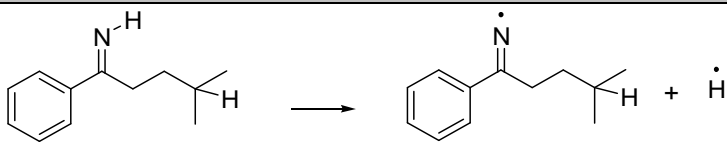   | 93.2                   |
| 2   |    | 92.3                   |
| 3   |    | 95.6                   |
| 4   |   | 95.2                   |
| 5   |  | 120.9                  |
| 6   |  | 121.2                  |
| 7   |  | 92.5                   |
| 8   |   | -6.8                   |

| No. | Reactions                                                                           | Kcal mol <sup>-1</sup> |
|-----|-------------------------------------------------------------------------------------|------------------------|
| 9   | 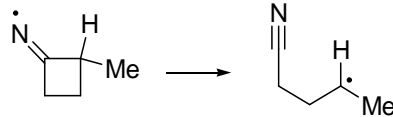   | -8.3                   |
| 10  |    | -18.7                  |
| 11  |    | -10.2                  |
| 12  |    | 12.0                   |
| 13  |    | 10.0                   |
| 14  |   | -0.9                   |
| 15  |  | 7.9                    |
| 16  |  | 18.6                   |
| 17  |  | 15.0                   |
| 18  |  | 3.7                    |



| No. | Reactions                                                                            | Kcal mol <sup>-1</sup> |
|-----|--------------------------------------------------------------------------------------|------------------------|
| 19  | 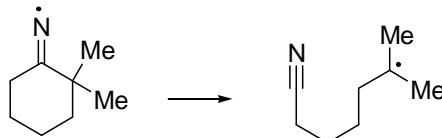    | 12.8                   |
| 20  |     | 14.6                   |
| 21  |     | 10.8                   |
| 22  |     | -1.2                   |
| 23  |    | 9.0                    |
| 24  |  | 0.6                    |
| 25  |  | 3.5                    |
| 26  |  | 6.3                    |

**Computed Energies** [values are in Hartree]

| No. | Species                                                                             | Total Electronic Energy | Sum of Electronic and Zero-point Energies | Sum of Electronic and Thermal Enthalpies | Gibbs Free Energy |
|-----|-------------------------------------------------------------------------------------|-------------------------|-------------------------------------------|------------------------------------------|-------------------|
| 1   | 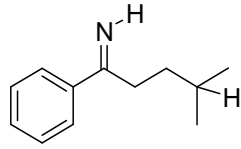   | -524.1354695            | -523.876405                               | -523.862063                              | -523.917814       |
| 2   |    | -523.4576186            | -523.211808                               | -523.197320                              | -523.255216       |
| 3   | $\cdot\text{H}$                                                                     | -0.5185156              | -0.518516                                 | -0.516155                                | -0.529170         |
| 4   |    | -524.1336755            | -523.875000                               | -523.860488                              | -523.916784       |
| 5   |   | -523.4530609            | -523.208598                               | -523.193598                              | -523.252112       |
| 6   |  | -523.4519284            | -523.207782                               | -523.192637                              | -523.252061       |
| 7   |  | -524.5252933            | -524.253414                               | -524.239606                              | -524.293228       |
| 8   |  | -523.8014873            | -523.545696                               | -523.530734                              | -523.588419       |
| 9   |  | -523.8013617            | -523.545175                               | -523.530245                              | -523.587838       |

| No. | Species                                                                             | Total Electronic Energy | Sum of Electronic and Zero-point Energies | Sum of Electronic and Thermal Enthalpies | Gibbs Free Energy |
|-----|-------------------------------------------------------------------------------------|-------------------------|-------------------------------------------|------------------------------------------|-------------------|
| 10  | 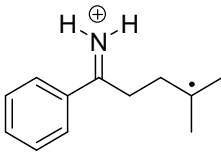   | -523.8488571            | -523.591406                               | -523.576081                              | -523.635315       |
| 11  |    | -211.4147367            | -211.326279                               | -211.321084                              | -211.353832       |
| 12  |    | -211.4249726            | -211.338956                               | -211.332400                              | -211.368226       |
| 13  |    | -250.8892424            | -250.772918                               | -250.765575                              | -250.803372       |
| 14  |   | -250.9017145            | -250.787437                               | -250.778761                              | -250.820570       |
| 15  |  | -443.2395939            | -443.071085                               | -443.060712                              | -443.107319       |
| 16  |  | -443.2695386            | -443.101734                               | -443.090543                              | -443.140367       |
| 17  |  | -290.3623497            | -290.218973                               | -290.210169                              | -290.251145       |
| 18  |  | -290.3782924            | -290.236530                               | -290.226381                              | -290.271731       |
| 19  |  | -250.9183288            | -250.799789                               | -250.793126                              | -250.829630       |
| 20  |  | -250.8967484            | -250.782526                               | -250.774077                              | -250.814675       |

| No. | Species                                                                             | Total Electronic Energy | Sum of Electronic and Zero-point Energies | Sum of Electronic and Thermal Enthalpies | Gibbs Free Energy |
|-----|-------------------------------------------------------------------------------------|-------------------------|-------------------------------------------|------------------------------------------|-------------------|
| 21  | 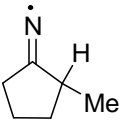   | -290.3894344            | -290.243322                               | -290.235243                              | -290.275064       |
| 22  |    | -290.3714698            | -290.229160                               | -290.219294                              | -290.263671       |
| 23  |    | -482.7382544            | -482.539866                               | -482.528750                              | -482.577114       |
| 24  |    | -482.7384872            | -482.542664                               | -482.530216                              | -482.582598       |
| 25  |   | -329.8618548            | -329.688780                               | -329.679266                              | -329.721985       |
| 26  |  | -329.8478144            | -329.678085                               | -329.666715                              | -329.714781       |
| 27  |  | -290.3955297            | -290.248013                               | -290.240449                              | -290.278884       |
| 28  |  | -290.3626814            | -290.220452                               | -290.210740                              | -290.254345       |
| 29  |  | -329.8652279            | -329.690137                               | -329.681118                              | -329.722760       |
| 30  |  | -329.8385404            | -329.668335                               | -329.657144                              | -329.705004       |

| No. | Species                                                                             | Total Electronic Energy | Sum of Electronic and Zero-point Energies | Sum of Electronic and Thermal Enthalpies | Gibbs Free Energy |
|-----|-------------------------------------------------------------------------------------|-------------------------|-------------------------------------------|------------------------------------------|-------------------|
| 31  | 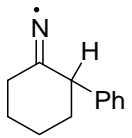   | -522.2150475            | -521.987578                               | -521.975551                              | -522.025364       |
| 32  |    | -522.2072852            | -521.983313                               | -521.969633                              | -522.024513       |
| 33  |    | -369.3367271            | -369.134686                               | -369.124306                              | -369.168603       |
| 34  |    | -369.3146039            | -369.116407                               | -369.103968                              | -369.154482       |
| 35  |   | -329.8585988            | -329.683115                               | -329.674234                              | -329.716155       |
| 36  |  | -329.832049             | -329.661920                               | -329.650930                              | -329.698222       |
| 37  |  | -369.3288049            | -369.125761                               | -369.115516                              | -369.160455       |
| 38  |  | -369.3088806            | -369.110835                               | -369.098369                              | -369.149581       |
| 39  |  | -561.676313             | -561.421394                               | -561.407889                              | -561.461807       |

| No. | Species                                                                             | Total Electronic Energy | Sum of Electronic and Zero-point Energies | Sum of Electronic and Thermal Enthalpies | Gibbs Free Energy |
|-----|-------------------------------------------------------------------------------------|-------------------------|-------------------------------------------|------------------------------------------|-------------------|
| 40  | 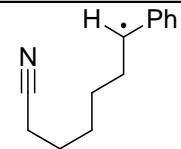   | -561.6763643            | -561.424871                               | -561.409748                              | -561.468555       |
| 41  |    | -408.8002562            | -408.569941                               | -408.558383                              | -408.605425       |
| 42  |    | -408.7837159            | -408.557974                               | -408.544051                              | -408.598914       |
| 43  |    | -443.2666946            | -443.096752                               | -443.088263                              | -443.129741       |
| 44  |   | -443.2656329            | -443.098393                               | -443.087258                              | -443.135158       |
| 45  |  | -482.7476837            | -482.549714                               | -482.538412                              | -482.586467       |
| 46  |  | -482.7405199            | -482.545878                               | -482.532913                              | -482.585587       |
| 47  |  | -522.2176861            | -521.992566                               | -521.979893                              | -522.030121       |
| 48  |  | -522.2064323            | -521.984148                               | -521.969853                              | -522.024947       |

## Optimized Structures and Cartesian Coordinates

| No.                   | Species                                                                             | Optimized Structure                                                                  |             |
|-----------------------|-------------------------------------------------------------------------------------|--------------------------------------------------------------------------------------|-------------|
| 1                     | 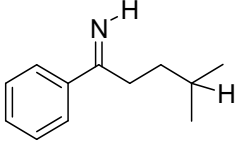   |    |             |
| Cartesian Coordinates |                                                                                     |                                                                                      |             |
| C                     | -0.23464200                                                                         | 0.96528500                                                                           | 0.00002300  |
| C                     | -1.55110900                                                                         | 0.26392400                                                                           | 0.00001000  |
| C                     | -2.72640600                                                                         | 1.02315800                                                                           | -0.00000800 |
| C                     | -1.65650900                                                                         | -1.12890200                                                                          | 0.00000800  |
| C                     | -3.96677100                                                                         | 0.40757800                                                                           | -0.00002700 |
| H                     | -2.63081400                                                                         | 2.10204500                                                                           | -0.00000800 |
| C                     | -2.90200000                                                                         | -1.74716900                                                                          | -0.00001000 |
| H                     | -0.76665100                                                                         | -1.74691800                                                                          | 0.00002200  |
| C                     | -4.05997600                                                                         | -0.98190400                                                                          | -0.00002700 |
| H                     | -4.86766200                                                                         | 1.01135700                                                                           | -0.00003400 |
| H                     | -2.96491000                                                                         | -2.82969400                                                                          | -0.00001000 |
| H                     | -5.03144000                                                                         | -1.46383500                                                                          | -0.00003900 |
| N                     | -0.24231000                                                                         | 2.23954400                                                                           | 0.00003500  |
| C                     | 1.01218300                                                                          | 0.10401100                                                                           | 0.00003800  |
| H                     | 0.96129200                                                                          | -0.55727700                                                                          | 0.87268700  |
| H                     | 0.96132400                                                                          | -0.55723300                                                                          | -0.87265900 |
| H                     | 0.70648900                                                                          | 2.61156700                                                                           | 0.00007000  |
| C                     | 2.32709200                                                                          | 0.87112200                                                                           | 0.00005500  |
| H                     | 2.36162600                                                                          | 1.52697600                                                                           | -0.87879600 |
| H                     | 2.36165800                                                                          | 1.52693900                                                                           | 0.87892700  |
| C                     | 3.59467300                                                                          | 0.00258500                                                                           | 0.00001200  |
| H                     | 4.43756200                                                                          | 0.70531200                                                                           | 0.00007200  |
| C                     | 3.71844200                                                                          | -0.85205000                                                                          | 1.25978400  |
| C                     | 3.71846700                                                                          | -0.85187200                                                                          | -1.25987500 |
| H                     | 4.68629700                                                                          | -1.35973200                                                                          | 1.29092700  |
| H                     | 3.63110800                                                                          | -0.24483100                                                                          | 2.16546300  |
| H                     | 2.94606700                                                                          | -1.62608900                                                                          | 1.30000700  |
| H                     | 4.68629700                                                                          | -1.35960300                                                                          | -1.29104500 |
| H                     | 2.94605700                                                                          | -1.62587200                                                                          | -1.30025400 |
| H                     | 3.63120800                                                                          | -0.24451800                                                                          | -2.16546900 |
| 2                     |  |  |             |

| No.                   | Species                                                                             | Optimized Structure                                                                  |
|-----------------------|-------------------------------------------------------------------------------------|--------------------------------------------------------------------------------------|
| Cartesian Coordinates |                                                                                     |                                                                                      |
| C                     | 0.22703500 0.94627800 -0.00004000                                                   |                                                                                      |
| C                     | 1.56453500 0.28031200 0.00003800                                                    |                                                                                      |
| C                     | 2.72493000 1.06222600 -0.00012500                                                   |                                                                                      |
| C                     | 1.68786600 -1.10941900 0.00025600                                                   |                                                                                      |
| C                     | 3.97478800 0.46593400 -0.00010100                                                   |                                                                                      |
| H                     | 2.62894000 2.14173100 -0.00027000                                                   |                                                                                      |
| C                     | 2.94392300 -1.70580200 0.00028700                                                   |                                                                                      |
| H                     | 0.80543800 -1.73753100 0.00040100                                                   |                                                                                      |
| C                     | 4.08914000 -0.92166000 0.00010000                                                   |                                                                                      |
| H                     | 4.86540300 1.08430700 -0.00023900                                                   |                                                                                      |
| H                     | 3.02433000 -2.78702900 0.00044900                                                   |                                                                                      |
| H                     | 5.06810500 -1.38761200 0.00012100                                                   |                                                                                      |
| N                     | 0.13223000 2.19694500 -0.00012800                                                   |                                                                                      |
| C                     | -1.02891200 0.08987900 -0.00007200                                                  |                                                                                      |
| H                     | -0.97716100 -0.56494100 -0.87724200                                                 |                                                                                      |
| H                     | -0.97740100 -0.56463200 0.87736000                                                  |                                                                                      |
| C                     | -2.32455900 0.89321200 -0.00046400                                                  |                                                                                      |
| H                     | -2.32987100 1.55364500 0.87273100                                                   |                                                                                      |
| H                     | -2.32968300 1.55298300 -0.87416500                                                  |                                                                                      |
| C                     | -3.60801400 0.05126700 -0.00026600                                                  |                                                                                      |
| C                     | -3.75122600 -0.80130800 -1.25966900                                                 |                                                                                      |
| C                     | -3.75178900 -0.79973200 1.26013400                                                  |                                                                                      |
| H                     | -4.72872200 -1.29043300 -1.29029900                                                 |                                                                                      |
| H                     | -3.65267500 -0.19542000 -2.16504500                                                 |                                                                                      |
| H                     | -2.99480500 -1.59144400 -1.30201600                                                 |                                                                                      |
| H                     | -4.72929900 -1.28881500 1.29094100                                                  |                                                                                      |
| H                     | -2.99539400 -1.58983000 1.30381700                                                  |                                                                                      |
| H                     | -3.65363700 -0.19270000 2.16478400                                                  |                                                                                      |
| H                     | -4.43548300 0.77199000 -0.00089900                                                  |                                                                                      |
| 3                     | $\dot{\text{H}}$                                                                    |   |
| Cartesian Coordinates |                                                                                     |                                                                                      |
| H                     | 0.00000000 0.00000000 0.00000000                                                    |                                                                                      |
| 4                     |  |  |
| Cartesian Coordinates |                                                                                     |                                                                                      |
| C                     | -0.20901000 0.90359800 0.32241200                                                   |                                                                                      |
| C                     | -1.53662000 0.25162600 0.11879800                                                   |                                                                                      |
| C                     | -2.60257700 0.99511200 -0.39722600                                                  |                                                                                      |
| C                     | -1.75584200 -1.09045500 0.43962000                                                  |                                                                                      |



| No.                   | Species                                                                             | Optimized Structure |                                                                                      |
|-----------------------|-------------------------------------------------------------------------------------|---------------------|--------------------------------------------------------------------------------------|
| C                     | -3.85203900 0.41947200 -0.57643200                                                  |                     |                                                                                      |
| H                     | -2.44005800 2.02855400 -0.68545900                                                  |                     |                                                                                      |
| C                     | -3.01033300 -1.66373300 0.27496000                                                  |                     |                                                                                      |
| H                     | -0.94706300 -1.69023300 0.84003200                                                  |                     |                                                                                      |
| C                     | -4.06166300 -0.91202100 -0.23501500                                                 |                     |                                                                                      |
| H                     | -4.66250100 1.00913600 -0.99015000                                                  |                     |                                                                                      |
| H                     | -3.16631800 -2.70204800 0.54573600                                                  |                     |                                                                                      |
| H                     | -5.03836200 -1.36244800 -0.37122900                                                 |                     |                                                                                      |
| N                     | -0.06808400 2.11603600 0.68722800                                                   |                     |                                                                                      |
| C                     | 1.01845000 0.06930800 0.05122500                                                    |                     |                                                                                      |
| H                     | 1.00275900 -0.79223100 0.73047400                                                   |                     |                                                                                      |
| H                     | 0.91497700 -0.35814400 -0.95364900                                                  |                     |                                                                                      |
| C                     | 2.32908300 0.82916100 0.19424100                                                    |                     |                                                                                      |
| H                     | 2.30243300 1.69760800 -0.47144900                                                   |                     |                                                                                      |
| H                     | 2.38365000 1.24318000 1.20556000                                                    |                     |                                                                                      |
| C                     | 3.59373400 0.00780500 -0.09153800                                                   |                     |                                                                                      |
| H                     | 4.43584100 0.69639400 0.05567800                                                    |                     |                                                                                      |
| C                     | 3.77993500 -1.14748200 0.89058400                                                   |                     |                                                                                      |
| C                     | 3.66180600 -0.48454300 -1.53616800                                                  |                     |                                                                                      |
| H                     | 4.74889800 -1.63329500 0.74444200                                                   |                     |                                                                                      |
| H                     | 3.73319600 -0.80073200 1.92709000                                                   |                     |                                                                                      |
| H                     | 3.01180900 -1.91662100 0.75970600                                                   |                     |                                                                                      |
| H                     | 4.62637400 -0.95641900 -1.74398000                                                  |                     |                                                                                      |
| H                     | 2.88679400 -1.22841300 -1.74676600                                                  |                     |                                                                                      |
| H                     | 3.53421300 0.33993900 -2.24368600                                                   |                     |                                                                                      |
| H                     | -0.97960700 2.54643500 0.85428000                                                   |                     |                                                                                      |
| 5                     | 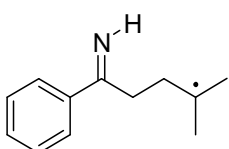 |                     |  |
| Cartesian Coordinates |                                                                                     |                     |                                                                                      |
| C                     | -0.25125000 0.87112800 0.07712000                                                   |                     |                                                                                      |
| C                     | -1.60020100 0.23906300 0.00571100                                                   |                     |                                                                                      |
| C                     | -2.73732400 1.04740000 0.11191500                                                   |                     |                                                                                      |
| C                     | -1.77222600 -1.13662800 -0.16446700                                                 |                     |                                                                                      |
| C                     | -4.00585500 0.49559000 0.04993400                                                   |                     |                                                                                      |
| H                     | -2.59002300 2.11246200 0.24281800                                                   |                     |                                                                                      |
| C                     | -3.04604000 -1.69059300 -0.22692500                                                 |                     |                                                                                      |
| H                     | -0.91305000 -1.79099900 -0.25116300                                                 |                     |                                                                                      |
| C                     | -4.16579400 -0.87737500 -0.11998000                                                 |                     |                                                                                      |
| H                     | -4.87663600 1.13652500 0.13406900                                                   |                     |                                                                                      |
| H                     | -3.16104100 -2.76064900 -0.35941300                                                 |                     |                                                                                      |

| No.                   | Species                                                                            | Optimized Structure                                                                 |  |  |
|-----------------------|------------------------------------------------------------------------------------|-------------------------------------------------------------------------------------|--|--|
| H                     | -5.15934000 -1.30926300 -0.16839600                                                |                                                                                     |  |  |
| N                     | -0.19494400 2.13537700 0.22749500                                                  |                                                                                     |  |  |
| C                     | 0.95178000 -0.04220700 -0.03729300                                                 |                                                                                     |  |  |
| H                     | 0.88472000 -0.79870300 0.75306500                                                  |                                                                                     |  |  |
| H                     | 0.87954700 -0.59771100 -0.97941000                                                 |                                                                                     |  |  |
| C                     | 2.31302300 0.65467900 0.03084100                                                   |                                                                                     |  |  |
| H                     | 2.38209900 1.38613800 -0.78205300                                                  |                                                                                     |  |  |
| H                     | 2.36732800 1.22686500 0.97178700                                                   |                                                                                     |  |  |
| C                     | 3.46668800 -0.29525000 -0.04980300                                                 |                                                                                     |  |  |
| C                     | 3.79306300 -1.13151400 1.13848200                                                  |                                                                                     |  |  |
| C                     | 4.50659000 -0.10328100 -1.09673000                                                 |                                                                                     |  |  |
| H                     | 4.47137500 -0.60440400 1.83093000                                                  |                                                                                     |  |  |
| H                     | 2.90371400 -1.39788900 1.71685800                                                  |                                                                                     |  |  |
| H                     | 4.30041300 -2.05933100 0.85531700                                                  |                                                                                     |  |  |
| H                     | 5.06740200 -1.02436700 -1.28350000                                                 |                                                                                     |  |  |
| H                     | 4.07318600 0.23016600 -2.04439500                                                  |                                                                                     |  |  |
| H                     | 5.24899600 0.65953300 -0.80496800                                                  |                                                                                     |  |  |
| H                     | 0.77118500 2.45791900 0.26315500                                                   |                                                                                     |  |  |
| 6                     | 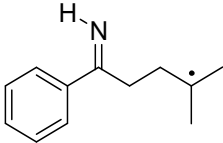 |  |  |  |
| Cartesian Coordinates |                                                                                    |                                                                                     |  |  |
| C                     | -0.20784000 0.85995200 0.33617400                                                  |                                                                                     |  |  |
| C                     | -1.54526400 0.23273200 0.12080700                                                  |                                                                                     |  |  |
| C                     | -2.60520600 1.00589300 -0.36303400                                                 |                                                                                     |  |  |
| C                     | -1.77819600 -1.11702500 0.39691900                                                 |                                                                                     |  |  |
| C                     | -3.86218600 0.45093900 -0.55413400                                                 |                                                                                     |  |  |
| H                     | -2.43269500 2.04656800 -0.61749100                                                 |                                                                                     |  |  |
| C                     | -3.04011200 -1.66994500 0.22034300                                                 |                                                                                     |  |  |
| H                     | -0.97368000 -1.73927000 0.77075900                                                 |                                                                                     |  |  |
| C                     | -4.08539600 -0.88903400 -0.25719500                                                |                                                                                     |  |  |
| H                     | -4.66807400 1.06350300 -0.94274700                                                 |                                                                                     |  |  |
| H                     | -3.20658400 -2.71513200 0.45610700                                                 |                                                                                     |  |  |
| H                     | -5.06802900 -1.32322800 -0.40305000                                                |                                                                                     |  |  |
| N                     | -0.04428200 2.06065800 0.72852800                                                  |                                                                                     |  |  |
| C                     | 1.00742800 0.01519200 0.04368700                                                   |                                                                                     |  |  |
| H                     | 1.00170400 -0.85224900 0.71593400                                                  |                                                                                     |  |  |
| H                     | 0.90183100 -0.40148600 -0.96555100                                                 |                                                                                     |  |  |
| C                     | 2.34198400 0.76191500 0.18102500                                                   |                                                                                     |  |  |
| H                     | 2.31569800 1.62968700 -0.48638200                                                  |                                                                                     |  |  |
| H                     | 2.40236400 1.16561500 1.19660800                                                   |                                                                                     |  |  |

| No.                   | Species                                                                           | Optimized Structure                                                                |
|-----------------------|-----------------------------------------------------------------------------------|------------------------------------------------------------------------------------|
| C                     | 3.52715000 -0.09422300 -0.11816800                                                |                                                                                    |
| C                     | 4.04771600 -1.01745900 0.92820800                                                 |                                                                                    |
| C                     | 3.92161600 -0.33189000 -1.53444200                                                |                                                                                    |
| H                     | 5.11625200 -1.21806600 0.79279900                                                 |                                                                                    |
| H                     | 3.90292400 -0.61132700 1.93365800                                                 |                                                                                    |
| H                     | 3.54958100 -2.00236900 0.90745300                                                 |                                                                                    |
| H                     | 4.98997200 -0.55781100 -1.62282200                                                |                                                                                    |
| H                     | 3.39111800 -1.19063300 -1.98101700                                                |                                                                                    |
| H                     | 3.70409900 0.53519300 -2.16519100                                                 |                                                                                    |
| H                     | -0.94667800 2.50411800 0.91010700                                                 |                                                                                    |
| 7                     | 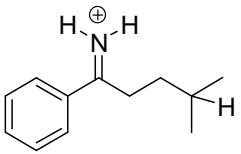 |  |
| Cartesian Coordinates |                                                                                   |                                                                                    |
| C                     | 0.24107200 0.87975000 -0.00001500                                                 |                                                                                    |
| C                     | 1.54814900 0.24802700 -0.00000300                                                 |                                                                                    |
| C                     | 2.73592200 1.00333700 -0.00002300                                                 |                                                                                    |
| C                     | 1.64088800 -1.15431600 0.00002800                                                 |                                                                                    |
| C                     | 3.96645300 0.37724900 -0.00001200                                                 |                                                                                    |
| H                     | 2.72379900 2.08793200 -0.00004900                                                 |                                                                                    |
| C                     | 2.87630500 -1.77739900 0.00004000                                                 |                                                                                    |
| H                     | 0.74738600 -1.76476700 0.00004500                                                 |                                                                                    |
| C                     | 4.03901200 -1.01472800 0.00001900                                                 |                                                                                    |
| H                     | 4.87312800 0.96938700 -0.00002800                                                 |                                                                                    |
| H                     | 2.93386100 -2.85877100 0.00006400                                                 |                                                                                    |
| H                     | 5.00640300 -1.50332000 0.00002700                                                 |                                                                                    |
| N                     | 0.12687400 2.17932000 -0.00003700                                                 |                                                                                    |
| C                     | -1.02083100 0.07925300 -0.00000400                                                |                                                                                    |
| H                     | -0.97485300 -0.58361700 -0.87157000                                               |                                                                                    |
| H                     | -0.97486600 -0.58357100 0.87159900                                                |                                                                                    |
| H                     | -0.78948900 2.60909000 -0.00004700                                                |                                                                                    |
| C                     | -2.32880100 0.86412000 -0.00003700                                                |                                                                                    |
| H                     | -2.37202500 1.50991500 0.88676200                                                 |                                                                                    |
| H                     | -2.37201100 1.50985500 -0.88688100                                                |                                                                                    |
| C                     | -3.58862000 -0.02056300 -0.00001400                                               |                                                                                    |
| H                     | -4.43041700 0.68086100 -0.00006200                                                |                                                                                    |
| C                     | -3.70049900 -0.87048100 -1.26329200                                               |                                                                                    |
| C                     | -3.70053800 -0.87035300 1.26334700                                                |                                                                                    |
| H                     | -4.66633400 -1.37864800 -1.29512000                                               |                                                                                    |
| H                     | -3.61867000 -0.26424700 -2.16985100                                               |                                                                                    |
| H                     | -2.93364800 -1.65104900 -1.30423800                                               |                                                                                    |

| No.                   | Species                                                                           | Optimized Structure                                                                |
|-----------------------|-----------------------------------------------------------------------------------|------------------------------------------------------------------------------------|
| H                     | -4.66637100 -1.37852400 1.29519200                                                |                                                                                    |
| H                     | -2.93368400 -1.65091100 1.30440300                                                |                                                                                    |
| H                     | -3.61874800 -0.26402500 2.16984700                                                |                                                                                    |
| H                     | 0.92736000 2.79579300 -0.00004300                                                 |                                                                                    |
| 8                     | 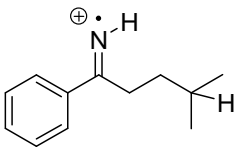 |  |
| Cartesian Coordinates |                                                                                   |                                                                                    |
| C                     | 0.22271100 0.80314000 -0.19521900                                                 |                                                                                    |
| N                     | 0.27179800 2.04421700 -0.51158700                                                 |                                                                                    |
| C                     | -1.05205900 0.04249100 0.00936700                                                 |                                                                                    |
| H                     | -1.00524900 -0.84671400 -0.63205800                                               |                                                                                    |
| H                     | -1.01808400 -0.33480600 1.03893000                                                |                                                                                    |
| C                     | -2.33123300 0.83062600 -0.25176800                                                |                                                                                    |
| H                     | -2.34027200 1.17297300 -1.29422800                                                |                                                                                    |
| C                     | 1.54269700 0.19562900 -0.03951500                                                 |                                                                                    |
| C                     | 1.75070800 -1.18317200 -0.22763500                                                |                                                                                    |
| C                     | 2.64804700 1.04994100 0.24263200                                                  |                                                                                    |
| C                     | 3.02391300 -1.69532200 -0.11899200                                                |                                                                                    |
| H                     | 0.92255700 -1.83871200 -0.46469400                                                |                                                                                    |
| C                     | 3.92000200 0.52411500 0.33865700                                                  |                                                                                    |
| H                     | 2.45722700 2.09890400 0.43127900                                                  |                                                                                    |
| C                     | 4.11116000 -0.84289000 0.15958100                                                 |                                                                                    |
| H                     | 3.19624100 -2.75652000 -0.25126000                                                |                                                                                    |
| H                     | 4.75923500 1.16711800 0.57275300                                                  |                                                                                    |
| H                     | 5.10655900 -1.26414400 0.24424600                                                 |                                                                                    |
| H                     | -2.34365400 1.72347900 0.38480400                                                 |                                                                                    |
| C                     | -3.62029300 0.03163500 0.00246100                                                 |                                                                                    |
| H                     | -4.43778800 0.72152600 -0.23502900                                                |                                                                                    |
| C                     | -3.77226000 -0.37294800 1.46677300                                                |                                                                                    |
| C                     | -3.75004900 -1.17049900 -0.93005200                                               |                                                                                    |
| H                     | -3.01072000 -1.94743200 -0.70683400                                               |                                                                                    |
| H                     | -4.73225400 -1.63462200 -0.81914100                                               |                                                                                    |
| H                     | -3.63900800 -0.88430100 -1.97983500                                               |                                                                                    |
| H                     | -3.67903500 0.48630100 2.13673200                                                 |                                                                                    |
| H                     | -4.75414000 -0.81830100 1.63945100                                                |                                                                                    |
| H                     | -3.03080700 -1.12116000 1.76642400                                                |                                                                                    |
| H                     | -0.51346500 2.49041000 -0.98817600                                                |                                                                                    |

| No.                   | Species                                                                             | Optimized Structure                                                                  |             |
|-----------------------|-------------------------------------------------------------------------------------|--------------------------------------------------------------------------------------|-------------|
| 9                     | 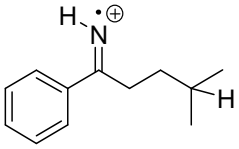   |    |             |
| Cartesian Coordinates |                                                                                     |                                                                                      |             |
| C                     | -0.18070300                                                                         | -0.69960000                                                                          | -0.45672700 |
| N                     | -0.20052000                                                                         | -1.70283100                                                                          | -1.22566700 |
| C                     | 1.05876400                                                                          | -0.04496900                                                                          | 0.02166400  |
| H                     | 0.95763100                                                                          | 1.02922300                                                                           | -0.18034400 |
| H                     | 1.02748100                                                                          | -0.12013600                                                                          | 1.11815200  |
| C                     | 2.34608000                                                                          | -0.62801800                                                                          | -0.55147100 |
| H                     | 2.32741400                                                                          | -0.51920000                                                                          | -1.64090900 |
| C                     | -1.54804400                                                                         | -0.19760200                                                                          | -0.16337500 |
| C                     | -1.92009800                                                                         | 1.10188100                                                                           | -0.55134900 |
| C                     | -2.46615900                                                                         | -1.05375100                                                                          | 0.48111300  |
| C                     | -3.17556600                                                                         | 1.56246200                                                                           | -0.21542400 |
| H                     | -1.22494000                                                                         | 1.73583200                                                                           | -1.08849700 |
| C                     | -3.71542500                                                                         | -0.57168200                                                                          | 0.82161300  |
| H                     | -2.17038300                                                                         | -2.05967200                                                                          | 0.75696500  |
| C                     | -4.07357100                                                                         | 0.72838300                                                                           | 0.46688100  |
| H                     | -3.46921800                                                                         | 2.57130700                                                                           | -0.47913100 |
| H                     | -4.41440200                                                                         | -1.20440200                                                                          | 1.35439500  |
| H                     | -5.06253200                                                                         | 1.09834100                                                                           | 0.71193700  |
| H                     | 2.36789600                                                                          | -1.70400700                                                                          | -0.34470000 |
| C                     | 3.62451300                                                                          | 0.01701900                                                                           | 0.00187100  |
| H                     | 4.44972500                                                                          | -0.50001700                                                                          | -0.50116500 |
| C                     | 3.78867300                                                                          | -0.21139700                                                                          | 1.50275400  |
| C                     | 3.72830500                                                                          | 1.49822500                                                                           | -0.35613800 |
| H                     | 2.97457700                                                                          | 2.10095600                                                                           | 0.16211800  |
| H                     | 4.70226300                                                                          | 1.89478300                                                                           | -0.06162000 |
| H                     | 3.61795000                                                                          | 1.66294900                                                                           | -1.43164100 |
| H                     | 3.71969300                                                                          | -1.27197700                                                                          | 1.76087900  |
| H                     | 4.76404500                                                                          | 0.14483900                                                                           | 1.84074900  |
| H                     | 3.03734100                                                                          | 0.33106100                                                                           | 2.08708300  |
| H                     | -1.00151000                                                                         | -2.27576800                                                                          | -1.49307200 |
| 10                    |  |  |             |
| Cartesian Coordinates |                                                                                     |                                                                                      |             |

| No.                   | Species                                                                             | Optimized Structure                                                                  |  |  |
|-----------------------|-------------------------------------------------------------------------------------|--------------------------------------------------------------------------------------|--|--|
| C                     | 0.23644700 1.14009100 0.21408200                                                    |                                                                                      |  |  |
| N                     | 0.25133300 2.40805000 -0.14986100                                                   |                                                                                      |  |  |
| C                     | -1.06505100 0.57391100 0.61546000                                                   |                                                                                      |  |  |
| H                     | -0.93130400 -0.27522500 1.28263900                                                  |                                                                                      |  |  |
| H                     | -1.65322500 1.32866600 1.14358700                                                   |                                                                                      |  |  |
| C                     | -1.90000700 0.11804600 -0.66614700                                                  |                                                                                      |  |  |
| H                     | -1.30257500 -0.60955900 -1.22105000                                                 |                                                                                      |  |  |
| C                     | 1.44263000 0.34726800 0.11778200                                                    |                                                                                      |  |  |
| C                     | 1.36913300 -1.05673500 0.12856500                                                   |                                                                                      |  |  |
| C                     | 2.70781000 0.95759100 0.01923600                                                    |                                                                                      |  |  |
| C                     | 2.51744500 -1.82021000 0.01484900                                                   |                                                                                      |  |  |
| H                     | 0.41174100 -1.55612500 0.20657000                                                   |                                                                                      |  |  |
| C                     | 3.85150400 0.18898100 -0.08037600                                                   |                                                                                      |  |  |
| H                     | 2.81386900 2.03565800 0.07425300                                                    |                                                                                      |  |  |
| C                     | 3.75885600 -1.20120900 -0.09066900                                                  |                                                                                      |  |  |
| H                     | 2.44700900 -2.90096600 0.01199900                                                   |                                                                                      |  |  |
| H                     | 4.82037400 0.66965200 -0.13761700                                                   |                                                                                      |  |  |
| H                     | 4.65769200 -1.80129500 -0.16963800                                                  |                                                                                      |  |  |
| H                     | -2.02774400 1.00527900 -1.29492400                                                  |                                                                                      |  |  |
| C                     | -3.20232400 -0.44778200 -0.27356700                                                 |                                                                                      |  |  |
| H                     | 1.06198900 2.83264200 -0.57671800                                                   |                                                                                      |  |  |
| H                     | -0.56063600 2.99498800 -0.02415800                                                  |                                                                                      |  |  |
| C                     | -3.32612900 -1.89761100 0.01876500                                                  |                                                                                      |  |  |
| H                     | -3.21519500 -2.10442000 1.09564500                                                  |                                                                                      |  |  |
| H                     | -4.31840000 -2.27077200 -0.25131600                                                 |                                                                                      |  |  |
| H                     | -2.57859800 -2.49455000 -0.50864000                                                 |                                                                                      |  |  |
| C                     | -4.31141700 0.46246000 0.10680900                                                   |                                                                                      |  |  |
| H                     | -4.22421800 1.44564400 -0.36205000                                                  |                                                                                      |  |  |
| H                     | -5.28177700 0.03716800 -0.16548000                                                  |                                                                                      |  |  |
| H                     | -4.35171400 0.61806700 1.19719000                                                   |                                                                                      |  |  |
| 11                    | 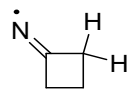 |  |  |  |
| Cartesian Coordinates |                                                                                     |                                                                                      |  |  |
| C                     | -0.34583300 1.10120300 0.00017500                                                   |                                                                                      |  |  |
| C                     | -1.43513400 -0.00000100 0.00012500                                                  |                                                                                      |  |  |
| C                     | -0.34583000 -1.10120300 0.00007900                                                  |                                                                                      |  |  |
| C                     | 0.73089400 0.00000100 -0.00008900                                                   |                                                                                      |  |  |
| H                     | -0.30574100 1.73353500 -0.88826700                                                  |                                                                                      |  |  |
| H                     | -0.30556300 1.73320100 0.88884900                                                   |                                                                                      |  |  |
| H                     | -2.07157200 0.00003500 -0.88464700                                                  |                                                                                      |  |  |

| No.                   | Species                                                                             | Optimized Structure                                                                  |
|-----------------------|-------------------------------------------------------------------------------------|--------------------------------------------------------------------------------------|
| H                     | -2.07163700 -0.00004000 0.88485100                                                  |                                                                                      |
| H                     | -0.30573500 -1.73344600 -0.88842700                                                 |                                                                                      |
| H                     | -0.30556100 -1.73329200 0.88868800                                                  |                                                                                      |
| N                     | 1.96303200 0.00000100 -0.00039900                                                   |                                                                                      |
| 12                    | 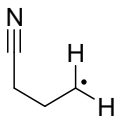   |    |
| Cartesian Coordinates |                                                                                     |                                                                                      |
| C                     | 1.24767000 0.06257500 -0.06287900                                                   |                                                                                      |
| N                     | 2.14180600 -0.64177600 0.11922000                                                   |                                                                                      |
| C                     | 0.10358000 0.93626900 -0.27044900                                                   |                                                                                      |
| H                     | 0.34636700 1.92247200 0.13767100                                                    |                                                                                      |
| H                     | -0.04807300 1.05703900 -1.34686900                                                  |                                                                                      |
| C                     | -1.18735500 0.39145400 0.39125000                                                   |                                                                                      |
| H                     | -0.99758500 0.31215600 1.46832100                                                   |                                                                                      |
| H                     | -1.96368700 1.14923000 0.25713400                                                   |                                                                                      |
| C                     | -1.62943300 -0.91493000 -0.15399300                                                 |                                                                                      |
| H                     | -2.47291100 -0.98623000 -0.82793000                                                 |                                                                                      |
| H                     | -1.06351600 -1.81443800 0.05355700                                                  |                                                                                      |
| 13                    |  |  |
| Cartesian Coordinates |                                                                                     |                                                                                      |
| C                     | -1.45645000 0.62244300 -0.08979800                                                  |                                                                                      |
| C                     | -0.13502700 1.42543200 -0.11321700                                                  |                                                                                      |
| C                     | 0.63045800 0.19385900 0.43640100                                                    |                                                                                      |
| C                     | -0.62114600 -0.65312500 0.10101000                                                  |                                                                                      |
| H                     | -2.06649100 0.81806600 0.79521500                                                   |                                                                                      |
| H                     | -2.08944600 0.63838000 -0.97681500                                                  |                                                                                      |
| H                     | -0.09963000 2.33309800 0.48941800                                                   |                                                                                      |
| H                     | 0.17595700 1.66324100 -1.13263700                                                   |                                                                                      |
| H                     | 0.70837000 0.25088800 1.52784400                                                    |                                                                                      |
| N                     | -0.81254600 -1.85518400 -0.08713900                                                 |                                                                                      |
| C                     | 1.94841600 -0.21507900 -0.18039100                                                  |                                                                                      |
| H                     | 2.72283400 0.52480600 0.04154200                                                    |                                                                                      |
| H                     | 2.27837800 -1.18115900 0.20765500                                                   |                                                                                      |
| H                     | 1.86034400 -0.30220700 -1.26627400                                                  |                                                                                      |

| No.                                                                                                                                                                                                                                                                                                                                                                                                                                                                                                                                                                                                                                                                                                                                                                                                                                                                                                                                                                                                                                                                                                                                                                                                                                                                                                                                                                                | Species                                                                             | Optimized Structure                                                                  |             |            |             |             |   |             |             |             |   |             |             |            |   |            |            |             |   |            |             |             |   |            |             |             |   |            |             |            |   |             |             |             |   |             |            |             |   |            |             |            |   |             |             |             |   |             |             |             |   |             |             |             |   |             |             |             |   |             |             |            |   |             |            |             |
|------------------------------------------------------------------------------------------------------------------------------------------------------------------------------------------------------------------------------------------------------------------------------------------------------------------------------------------------------------------------------------------------------------------------------------------------------------------------------------------------------------------------------------------------------------------------------------------------------------------------------------------------------------------------------------------------------------------------------------------------------------------------------------------------------------------------------------------------------------------------------------------------------------------------------------------------------------------------------------------------------------------------------------------------------------------------------------------------------------------------------------------------------------------------------------------------------------------------------------------------------------------------------------------------------------------------------------------------------------------------------------|-------------------------------------------------------------------------------------|--------------------------------------------------------------------------------------|-------------|------------|-------------|-------------|---|-------------|-------------|-------------|---|-------------|-------------|------------|---|------------|------------|-------------|---|------------|-------------|-------------|---|------------|-------------|-------------|---|------------|-------------|------------|---|-------------|-------------|-------------|---|-------------|------------|-------------|---|------------|-------------|------------|---|-------------|-------------|-------------|---|-------------|-------------|-------------|---|-------------|-------------|-------------|---|-------------|-------------|-------------|---|-------------|-------------|------------|---|-------------|------------|-------------|
| 14                                                                                                                                                                                                                                                                                                                                                                                                                                                                                                                                                                                                                                                                                                                                                                                                                                                                                                                                                                                                                                                                                                                                                                                                                                                                                                                                                                                 | 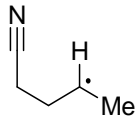   |    |             |            |             |             |   |             |             |             |   |             |             |            |   |            |            |             |   |            |             |             |   |            |             |             |   |            |             |            |   |             |             |             |   |             |            |             |   |            |             |            |   |             |             |             |   |             |             |             |   |             |             |             |   |             |             |             |   |             |             |            |   |             |            |             |
| <p>Cartesian Coordinates</p> <table border="1"> <tbody> <tr><td>C</td><td>0.72541600</td><td>-0.85272800</td><td>-0.52052700</td></tr> <tr><td>C</td><td>-0.43054500</td><td>-0.96105400</td><td>0.50848400</td></tr> <tr><td>C</td><td>-1.25802600</td><td>0.26852200</td><td>0.61929400</td></tr> <tr><td>C</td><td>1.69876300</td><td>0.16661900</td><td>-0.16208900</td></tr> <tr><td>H</td><td>1.24692400</td><td>-1.81144100</td><td>-0.60507900</td></tr> <tr><td>H</td><td>0.32676800</td><td>-0.61626900</td><td>-1.51155200</td></tr> <tr><td>H</td><td>0.00045400</td><td>-1.22364700</td><td>1.47856300</td></tr> <tr><td>H</td><td>-1.05116000</td><td>-1.80729200</td><td>0.18950900</td></tr> <tr><td>H</td><td>-0.96715200</td><td>1.02068800</td><td>1.34415400</td></tr> <tr><td>N</td><td>2.46281600</td><td>0.97419500</td><td>0.14279800</td></tr> <tr><td>C</td><td>-2.26562900</td><td>0.62086600</td><td>-0.41166200</td></tr> <tr><td>H</td><td>-1.81881800</td><td>1.14498800</td><td>-1.27198300</td></tr> <tr><td>H</td><td>-2.76366100</td><td>-0.26940700</td><td>-0.81100900</td></tr> <tr><td>H</td><td>-3.03293900</td><td>1.28966500</td><td>-0.01319700</td></tr> </tbody> </table>                                                                                                                                                             |                                                                                     |                                                                                      | C           | 0.72541600 | -0.85272800 | -0.52052700 | C | -0.43054500 | -0.96105400 | 0.50848400  | C | -1.25802600 | 0.26852200  | 0.61929400 | C | 1.69876300 | 0.16661900 | -0.16208900 | H | 1.24692400 | -1.81144100 | -0.60507900 | H | 0.32676800 | -0.61626900 | -1.51155200 | H | 0.00045400 | -1.22364700 | 1.47856300 | H | -1.05116000 | -1.80729200 | 0.18950900  | H | -0.96715200 | 1.02068800 | 1.34415400  | N | 2.46281600 | 0.97419500  | 0.14279800 | C | -2.26562900 | 0.62086600  | -0.41166200 | H | -1.81881800 | 1.14498800  | -1.27198300 | H | -2.76366100 | -0.26940700 | -0.81100900 | H | -3.03293900 | 1.28966500  | -0.01319700 |   |             |             |            |   |             |            |             |
| C                                                                                                                                                                                                                                                                                                                                                                                                                                                                                                                                                                                                                                                                                                                                                                                                                                                                                                                                                                                                                                                                                                                                                                                                                                                                                                                                                                                  | 0.72541600                                                                          | -0.85272800                                                                          | -0.52052700 |            |             |             |   |             |             |             |   |             |             |            |   |            |            |             |   |            |             |             |   |            |             |             |   |            |             |            |   |             |             |             |   |             |            |             |   |            |             |            |   |             |             |             |   |             |             |             |   |             |             |             |   |             |             |             |   |             |             |            |   |             |            |             |
| C                                                                                                                                                                                                                                                                                                                                                                                                                                                                                                                                                                                                                                                                                                                                                                                                                                                                                                                                                                                                                                                                                                                                                                                                                                                                                                                                                                                  | -0.43054500                                                                         | -0.96105400                                                                          | 0.50848400  |            |             |             |   |             |             |             |   |             |             |            |   |            |            |             |   |            |             |             |   |            |             |             |   |            |             |            |   |             |             |             |   |             |            |             |   |            |             |            |   |             |             |             |   |             |             |             |   |             |             |             |   |             |             |             |   |             |             |            |   |             |            |             |
| C                                                                                                                                                                                                                                                                                                                                                                                                                                                                                                                                                                                                                                                                                                                                                                                                                                                                                                                                                                                                                                                                                                                                                                                                                                                                                                                                                                                  | -1.25802600                                                                         | 0.26852200                                                                           | 0.61929400  |            |             |             |   |             |             |             |   |             |             |            |   |            |            |             |   |            |             |             |   |            |             |             |   |            |             |            |   |             |             |             |   |             |            |             |   |            |             |            |   |             |             |             |   |             |             |             |   |             |             |             |   |             |             |             |   |             |             |            |   |             |            |             |
| C                                                                                                                                                                                                                                                                                                                                                                                                                                                                                                                                                                                                                                                                                                                                                                                                                                                                                                                                                                                                                                                                                                                                                                                                                                                                                                                                                                                  | 1.69876300                                                                          | 0.16661900                                                                           | -0.16208900 |            |             |             |   |             |             |             |   |             |             |            |   |            |            |             |   |            |             |             |   |            |             |             |   |            |             |            |   |             |             |             |   |             |            |             |   |            |             |            |   |             |             |             |   |             |             |             |   |             |             |             |   |             |             |             |   |             |             |            |   |             |            |             |
| H                                                                                                                                                                                                                                                                                                                                                                                                                                                                                                                                                                                                                                                                                                                                                                                                                                                                                                                                                                                                                                                                                                                                                                                                                                                                                                                                                                                  | 1.24692400                                                                          | -1.81144100                                                                          | -0.60507900 |            |             |             |   |             |             |             |   |             |             |            |   |            |            |             |   |            |             |             |   |            |             |             |   |            |             |            |   |             |             |             |   |             |            |             |   |            |             |            |   |             |             |             |   |             |             |             |   |             |             |             |   |             |             |             |   |             |             |            |   |             |            |             |
| H                                                                                                                                                                                                                                                                                                                                                                                                                                                                                                                                                                                                                                                                                                                                                                                                                                                                                                                                                                                                                                                                                                                                                                                                                                                                                                                                                                                  | 0.32676800                                                                          | -0.61626900                                                                          | -1.51155200 |            |             |             |   |             |             |             |   |             |             |            |   |            |            |             |   |            |             |             |   |            |             |             |   |            |             |            |   |             |             |             |   |             |            |             |   |            |             |            |   |             |             |             |   |             |             |             |   |             |             |             |   |             |             |             |   |             |             |            |   |             |            |             |
| H                                                                                                                                                                                                                                                                                                                                                                                                                                                                                                                                                                                                                                                                                                                                                                                                                                                                                                                                                                                                                                                                                                                                                                                                                                                                                                                                                                                  | 0.00045400                                                                          | -1.22364700                                                                          | 1.47856300  |            |             |             |   |             |             |             |   |             |             |            |   |            |            |             |   |            |             |             |   |            |             |             |   |            |             |            |   |             |             |             |   |             |            |             |   |            |             |            |   |             |             |             |   |             |             |             |   |             |             |             |   |             |             |             |   |             |             |            |   |             |            |             |
| H                                                                                                                                                                                                                                                                                                                                                                                                                                                                                                                                                                                                                                                                                                                                                                                                                                                                                                                                                                                                                                                                                                                                                                                                                                                                                                                                                                                  | -1.05116000                                                                         | -1.80729200                                                                          | 0.18950900  |            |             |             |   |             |             |             |   |             |             |            |   |            |            |             |   |            |             |             |   |            |             |             |   |            |             |            |   |             |             |             |   |             |            |             |   |            |             |            |   |             |             |             |   |             |             |             |   |             |             |             |   |             |             |             |   |             |             |            |   |             |            |             |
| H                                                                                                                                                                                                                                                                                                                                                                                                                                                                                                                                                                                                                                                                                                                                                                                                                                                                                                                                                                                                                                                                                                                                                                                                                                                                                                                                                                                  | -0.96715200                                                                         | 1.02068800                                                                           | 1.34415400  |            |             |             |   |             |             |             |   |             |             |            |   |            |            |             |   |            |             |             |   |            |             |             |   |            |             |            |   |             |             |             |   |             |            |             |   |            |             |            |   |             |             |             |   |             |             |             |   |             |             |             |   |             |             |             |   |             |             |            |   |             |            |             |
| N                                                                                                                                                                                                                                                                                                                                                                                                                                                                                                                                                                                                                                                                                                                                                                                                                                                                                                                                                                                                                                                                                                                                                                                                                                                                                                                                                                                  | 2.46281600                                                                          | 0.97419500                                                                           | 0.14279800  |            |             |             |   |             |             |             |   |             |             |            |   |            |            |             |   |            |             |             |   |            |             |             |   |            |             |            |   |             |             |             |   |             |            |             |   |            |             |            |   |             |             |             |   |             |             |             |   |             |             |             |   |             |             |             |   |             |             |            |   |             |            |             |
| C                                                                                                                                                                                                                                                                                                                                                                                                                                                                                                                                                                                                                                                                                                                                                                                                                                                                                                                                                                                                                                                                                                                                                                                                                                                                                                                                                                                  | -2.26562900                                                                         | 0.62086600                                                                           | -0.41166200 |            |             |             |   |             |             |             |   |             |             |            |   |            |            |             |   |            |             |             |   |            |             |             |   |            |             |            |   |             |             |             |   |             |            |             |   |            |             |            |   |             |             |             |   |             |             |             |   |             |             |             |   |             |             |             |   |             |             |            |   |             |            |             |
| H                                                                                                                                                                                                                                                                                                                                                                                                                                                                                                                                                                                                                                                                                                                                                                                                                                                                                                                                                                                                                                                                                                                                                                                                                                                                                                                                                                                  | -1.81881800                                                                         | 1.14498800                                                                           | -1.27198300 |            |             |             |   |             |             |             |   |             |             |            |   |            |            |             |   |            |             |             |   |            |             |             |   |            |             |            |   |             |             |             |   |             |            |             |   |            |             |            |   |             |             |             |   |             |             |             |   |             |             |             |   |             |             |             |   |             |             |            |   |             |            |             |
| H                                                                                                                                                                                                                                                                                                                                                                                                                                                                                                                                                                                                                                                                                                                                                                                                                                                                                                                                                                                                                                                                                                                                                                                                                                                                                                                                                                                  | -2.76366100                                                                         | -0.26940700                                                                          | -0.81100900 |            |             |             |   |             |             |             |   |             |             |            |   |            |            |             |   |            |             |             |   |            |             |             |   |            |             |            |   |             |             |             |   |             |            |             |   |            |             |            |   |             |             |             |   |             |             |             |   |             |             |             |   |             |             |             |   |             |             |            |   |             |            |             |
| H                                                                                                                                                                                                                                                                                                                                                                                                                                                                                                                                                                                                                                                                                                                                                                                                                                                                                                                                                                                                                                                                                                                                                                                                                                                                                                                                                                                  | -3.03293900                                                                         | 1.28966500                                                                           | -0.01319700 |            |             |             |   |             |             |             |   |             |             |            |   |            |            |             |   |            |             |             |   |            |             |             |   |            |             |            |   |             |             |             |   |             |            |             |   |            |             |            |   |             |             |             |   |             |             |             |   |             |             |             |   |             |             |             |   |             |             |            |   |             |            |             |
| 15                                                                                                                                                                                                                                                                                                                                                                                                                                                                                                                                                                                                                                                                                                                                                                                                                                                                                                                                                                                                                                                                                                                                                                                                                                                                                                                                                                                 |  |  |             |            |             |             |   |             |             |             |   |             |             |            |   |            |            |             |   |            |             |             |   |            |             |             |   |            |             |            |   |             |             |             |   |             |            |             |   |            |             |            |   |             |             |             |   |             |             |             |   |             |             |             |   |             |             |             |   |             |             |            |   |             |            |             |
| <p>Cartesian Coordinates</p> <table border="1"> <tbody> <tr><td>C</td><td>3.02642700</td><td>-0.42512000</td><td>-0.39765500</td></tr> <tr><td>C</td><td>1.87098900</td><td>-1.42831000</td><td>-0.18273600</td></tr> <tr><td>C</td><td>1.05818900</td><td>-0.33757800</td><td>0.56748600</td></tr> <tr><td>C</td><td>2.08688900</td><td>0.70197600</td><td>0.05764300</td></tr> <tr><td>H</td><td>3.85460300</td><td>-0.54636100</td><td>0.30406400</td></tr> <tr><td>H</td><td>3.42118600</td><td>-0.31224100</td><td>-1.40719200</td></tr> <tr><td>H</td><td>2.10815300</td><td>-2.33112600</td><td>0.37946800</td></tr> <tr><td>H</td><td>1.38948100</td><td>-1.70566700</td><td>-1.12140900</td></tr> <tr><td>N</td><td>2.10053400</td><td>1.93028200</td><td>-0.02965300</td></tr> <tr><td>H</td><td>1.21060200</td><td>-0.43078700</td><td>1.64998100</td></tr> <tr><td>C</td><td>-0.39824900</td><td>-0.14389300</td><td>0.26475800</td></tr> <tr><td>C</td><td>-1.23244900</td><td>-1.25809300</td><td>0.15629500</td></tr> <tr><td>C</td><td>-0.94947300</td><td>1.12761400</td><td>0.11610200</td></tr> <tr><td>C</td><td>-2.59100400</td><td>-1.10412500</td><td>-0.08800800</td></tr> <tr><td>H</td><td>-0.81638300</td><td>-2.25472100</td><td>0.26593600</td></tr> <tr><td>C</td><td>-2.30867300</td><td>1.28100300</td><td>-0.12954800</td></tr> </tbody> </table> |                                                                                     |                                                                                      | C           | 3.02642700 | -0.42512000 | -0.39765500 | C | 1.87098900  | -1.42831000 | -0.18273600 | C | 1.05818900  | -0.33757800 | 0.56748600 | C | 2.08688900 | 0.70197600 | 0.05764300  | H | 3.85460300 | -0.54636100 | 0.30406400  | H | 3.42118600 | -0.31224100 | -1.40719200 | H | 2.10815300 | -2.33112600 | 0.37946800 | H | 1.38948100  | -1.70566700 | -1.12140900 | N | 2.10053400  | 1.93028200 | -0.02965300 | H | 1.21060200 | -0.43078700 | 1.64998100 | C | -0.39824900 | -0.14389300 | 0.26475800  | C | -1.23244900 | -1.25809300 | 0.15629500  | C | -0.94947300 | 1.12761400  | 0.11610200  | C | -2.59100400 | -1.10412500 | -0.08800800 | H | -0.81638300 | -2.25472100 | 0.26593600 | C | -2.30867300 | 1.28100300 | -0.12954800 |
| C                                                                                                                                                                                                                                                                                                                                                                                                                                                                                                                                                                                                                                                                                                                                                                                                                                                                                                                                                                                                                                                                                                                                                                                                                                                                                                                                                                                  | 3.02642700                                                                          | -0.42512000                                                                          | -0.39765500 |            |             |             |   |             |             |             |   |             |             |            |   |            |            |             |   |            |             |             |   |            |             |             |   |            |             |            |   |             |             |             |   |             |            |             |   |            |             |            |   |             |             |             |   |             |             |             |   |             |             |             |   |             |             |             |   |             |             |            |   |             |            |             |
| C                                                                                                                                                                                                                                                                                                                                                                                                                                                                                                                                                                                                                                                                                                                                                                                                                                                                                                                                                                                                                                                                                                                                                                                                                                                                                                                                                                                  | 1.87098900                                                                          | -1.42831000                                                                          | -0.18273600 |            |             |             |   |             |             |             |   |             |             |            |   |            |            |             |   |            |             |             |   |            |             |             |   |            |             |            |   |             |             |             |   |             |            |             |   |            |             |            |   |             |             |             |   |             |             |             |   |             |             |             |   |             |             |             |   |             |             |            |   |             |            |             |
| C                                                                                                                                                                                                                                                                                                                                                                                                                                                                                                                                                                                                                                                                                                                                                                                                                                                                                                                                                                                                                                                                                                                                                                                                                                                                                                                                                                                  | 1.05818900                                                                          | -0.33757800                                                                          | 0.56748600  |            |             |             |   |             |             |             |   |             |             |            |   |            |            |             |   |            |             |             |   |            |             |             |   |            |             |            |   |             |             |             |   |             |            |             |   |            |             |            |   |             |             |             |   |             |             |             |   |             |             |             |   |             |             |             |   |             |             |            |   |             |            |             |
| C                                                                                                                                                                                                                                                                                                                                                                                                                                                                                                                                                                                                                                                                                                                                                                                                                                                                                                                                                                                                                                                                                                                                                                                                                                                                                                                                                                                  | 2.08688900                                                                          | 0.70197600                                                                           | 0.05764300  |            |             |             |   |             |             |             |   |             |             |            |   |            |            |             |   |            |             |             |   |            |             |             |   |            |             |            |   |             |             |             |   |             |            |             |   |            |             |            |   |             |             |             |   |             |             |             |   |             |             |             |   |             |             |             |   |             |             |            |   |             |            |             |
| H                                                                                                                                                                                                                                                                                                                                                                                                                                                                                                                                                                                                                                                                                                                                                                                                                                                                                                                                                                                                                                                                                                                                                                                                                                                                                                                                                                                  | 3.85460300                                                                          | -0.54636100                                                                          | 0.30406400  |            |             |             |   |             |             |             |   |             |             |            |   |            |            |             |   |            |             |             |   |            |             |             |   |            |             |            |   |             |             |             |   |             |            |             |   |            |             |            |   |             |             |             |   |             |             |             |   |             |             |             |   |             |             |             |   |             |             |            |   |             |            |             |
| H                                                                                                                                                                                                                                                                                                                                                                                                                                                                                                                                                                                                                                                                                                                                                                                                                                                                                                                                                                                                                                                                                                                                                                                                                                                                                                                                                                                  | 3.42118600                                                                          | -0.31224100                                                                          | -1.40719200 |            |             |             |   |             |             |             |   |             |             |            |   |            |            |             |   |            |             |             |   |            |             |             |   |            |             |            |   |             |             |             |   |             |            |             |   |            |             |            |   |             |             |             |   |             |             |             |   |             |             |             |   |             |             |             |   |             |             |            |   |             |            |             |
| H                                                                                                                                                                                                                                                                                                                                                                                                                                                                                                                                                                                                                                                                                                                                                                                                                                                                                                                                                                                                                                                                                                                                                                                                                                                                                                                                                                                  | 2.10815300                                                                          | -2.33112600                                                                          | 0.37946800  |            |             |             |   |             |             |             |   |             |             |            |   |            |            |             |   |            |             |             |   |            |             |             |   |            |             |            |   |             |             |             |   |             |            |             |   |            |             |            |   |             |             |             |   |             |             |             |   |             |             |             |   |             |             |             |   |             |             |            |   |             |            |             |
| H                                                                                                                                                                                                                                                                                                                                                                                                                                                                                                                                                                                                                                                                                                                                                                                                                                                                                                                                                                                                                                                                                                                                                                                                                                                                                                                                                                                  | 1.38948100                                                                          | -1.70566700                                                                          | -1.12140900 |            |             |             |   |             |             |             |   |             |             |            |   |            |            |             |   |            |             |             |   |            |             |             |   |            |             |            |   |             |             |             |   |             |            |             |   |            |             |            |   |             |             |             |   |             |             |             |   |             |             |             |   |             |             |             |   |             |             |            |   |             |            |             |
| N                                                                                                                                                                                                                                                                                                                                                                                                                                                                                                                                                                                                                                                                                                                                                                                                                                                                                                                                                                                                                                                                                                                                                                                                                                                                                                                                                                                  | 2.10053400                                                                          | 1.93028200                                                                           | -0.02965300 |            |             |             |   |             |             |             |   |             |             |            |   |            |            |             |   |            |             |             |   |            |             |             |   |            |             |            |   |             |             |             |   |             |            |             |   |            |             |            |   |             |             |             |   |             |             |             |   |             |             |             |   |             |             |             |   |             |             |            |   |             |            |             |
| H                                                                                                                                                                                                                                                                                                                                                                                                                                                                                                                                                                                                                                                                                                                                                                                                                                                                                                                                                                                                                                                                                                                                                                                                                                                                                                                                                                                  | 1.21060200                                                                          | -0.43078700                                                                          | 1.64998100  |            |             |             |   |             |             |             |   |             |             |            |   |            |            |             |   |            |             |             |   |            |             |             |   |            |             |            |   |             |             |             |   |             |            |             |   |            |             |            |   |             |             |             |   |             |             |             |   |             |             |             |   |             |             |             |   |             |             |            |   |             |            |             |
| C                                                                                                                                                                                                                                                                                                                                                                                                                                                                                                                                                                                                                                                                                                                                                                                                                                                                                                                                                                                                                                                                                                                                                                                                                                                                                                                                                                                  | -0.39824900                                                                         | -0.14389300                                                                          | 0.26475800  |            |             |             |   |             |             |             |   |             |             |            |   |            |            |             |   |            |             |             |   |            |             |             |   |            |             |            |   |             |             |             |   |             |            |             |   |            |             |            |   |             |             |             |   |             |             |             |   |             |             |             |   |             |             |             |   |             |             |            |   |             |            |             |
| C                                                                                                                                                                                                                                                                                                                                                                                                                                                                                                                                                                                                                                                                                                                                                                                                                                                                                                                                                                                                                                                                                                                                                                                                                                                                                                                                                                                  | -1.23244900                                                                         | -1.25809300                                                                          | 0.15629500  |            |             |             |   |             |             |             |   |             |             |            |   |            |            |             |   |            |             |             |   |            |             |             |   |            |             |            |   |             |             |             |   |             |            |             |   |            |             |            |   |             |             |             |   |             |             |             |   |             |             |             |   |             |             |             |   |             |             |            |   |             |            |             |
| C                                                                                                                                                                                                                                                                                                                                                                                                                                                                                                                                                                                                                                                                                                                                                                                                                                                                                                                                                                                                                                                                                                                                                                                                                                                                                                                                                                                  | -0.94947300                                                                         | 1.12761400                                                                           | 0.11610200  |            |             |             |   |             |             |             |   |             |             |            |   |            |            |             |   |            |             |             |   |            |             |             |   |            |             |            |   |             |             |             |   |             |            |             |   |            |             |            |   |             |             |             |   |             |             |             |   |             |             |             |   |             |             |             |   |             |             |            |   |             |            |             |
| C                                                                                                                                                                                                                                                                                                                                                                                                                                                                                                                                                                                                                                                                                                                                                                                                                                                                                                                                                                                                                                                                                                                                                                                                                                                                                                                                                                                  | -2.59100400                                                                         | -1.10412500                                                                          | -0.08800800 |            |             |             |   |             |             |             |   |             |             |            |   |            |            |             |   |            |             |             |   |            |             |             |   |            |             |            |   |             |             |             |   |             |            |             |   |            |             |            |   |             |             |             |   |             |             |             |   |             |             |             |   |             |             |             |   |             |             |            |   |             |            |             |
| H                                                                                                                                                                                                                                                                                                                                                                                                                                                                                                                                                                                                                                                                                                                                                                                                                                                                                                                                                                                                                                                                                                                                                                                                                                                                                                                                                                                  | -0.81638300                                                                         | -2.25472100                                                                          | 0.26593600  |            |             |             |   |             |             |             |   |             |             |            |   |            |            |             |   |            |             |             |   |            |             |             |   |            |             |            |   |             |             |             |   |             |            |             |   |            |             |            |   |             |             |             |   |             |             |             |   |             |             |             |   |             |             |             |   |             |             |            |   |             |            |             |
| C                                                                                                                                                                                                                                                                                                                                                                                                                                                                                                                                                                                                                                                                                                                                                                                                                                                                                                                                                                                                                                                                                                                                                                                                                                                                                                                                                                                  | -2.30867300                                                                         | 1.28100300                                                                           | -0.12954800 |            |             |             |   |             |             |             |   |             |             |            |   |            |            |             |   |            |             |             |   |            |             |             |   |            |             |            |   |             |             |             |   |             |            |             |   |            |             |            |   |             |             |             |   |             |             |             |   |             |             |             |   |             |             |             |   |             |             |            |   |             |            |             |



| No.                   | Species                                                                                                                                                                                                                                                     | Optimized Structure                                                                  |
|-----------------------|-------------------------------------------------------------------------------------------------------------------------------------------------------------------------------------------------------------------------------------------------------------|--------------------------------------------------------------------------------------|
|                       | H      -0.30278200    1.99682400    0.17811300<br>C      -3.13383200    0.16753400    -0.23069600<br>H      -3.22576300    -1.97962000    -0.16962300<br>H      -2.72227800    2.27635600    -0.24817900<br>H      -4.19344000    0.28932700    -0.42542300 |                                                                                      |
| 16                    | 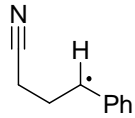                                                                                                                                                                           |    |
| Cartesian Coordinates |                                                                                                                                                                                                                                                             |                                                                                      |
| C                     | 2.52744900    0.92158900    0.32793300                                                                                                                                                                                                                      |                                                                                      |
| C                     | 1.63715900    0.80479700    -0.93374000                                                                                                                                                                                                                     |                                                                                      |
| C                     | 0.63712000    -0.29254300    -0.84633700                                                                                                                                                                                                                    |                                                                                      |
| C                     | 3.33680800    -0.26646100    0.54972300                                                                                                                                                                                                                     |                                                                                      |
| H                     | 3.19927900    1.78116000    0.23767900                                                                                                                                                                                                                      |                                                                                      |
| H                     | 1.90327700    1.08500500    1.21110300                                                                                                                                                                                                                      |                                                                                      |
| H                     | 2.28988700    0.64432900    -1.79713300                                                                                                                                                                                                                     |                                                                                      |
| H                     | 1.15331800    1.77400300    -1.07991500                                                                                                                                                                                                                     |                                                                                      |
| N                     | 3.97659400    -1.21325800    0.70118500                                                                                                                                                                                                                     |                                                                                      |
| H                     | 0.97749300    -1.29245400    -1.09606100                                                                                                                                                                                                                    |                                                                                      |
| C                     | -0.69617400    -0.15448200    -0.39532100                                                                                                                                                                                                                   |                                                                                      |
| C                     | -1.53201400    -1.29743500    -0.32699000                                                                                                                                                                                                                   |                                                                                      |
| C                     | -1.25941300    1.08251100    0.00345300                                                                                                                                                                                                                     |                                                                                      |
| C                     | -2.83831400    -1.20713300    0.10872900                                                                                                                                                                                                                    |                                                                                      |
| H                     | -1.12389700    -2.25764700    -0.62489400                                                                                                                                                                                                                   |                                                                                      |
| C                     | -2.56886400    1.16230200    0.43970700                                                                                                                                                                                                                     |                                                                                      |
| H                     | -0.65986300    1.98505800    -0.03130200                                                                                                                                                                                                                    |                                                                                      |
| C                     | -3.36907700    0.02313800    0.49661100                                                                                                                                                                                                                     |                                                                                      |
| H                     | -3.45378400    -2.09903000    0.15023800                                                                                                                                                                                                                    |                                                                                      |
| H                     | -2.97512400    2.12203800    0.74000700                                                                                                                                                                                                                     |                                                                                      |
| H                     | -4.39481500    0.09264400    0.83937700                                                                                                                                                                                                                     |                                                                                      |
| 17                    |                                                                                                                                                                          |  |
| Cartesian Coordinates |                                                                                                                                                                                                                                                             |                                                                                      |
| C                     | -1.55554500    0.77120600    -0.05787500                                                                                                                                                                                                                    |                                                                                      |
| C                     | -0.19347100    1.39796000    -0.43297600                                                                                                                                                                                                                    |                                                                                      |
| C                     | 0.54555200    0.08946900    -0.02629600                                                                                                                                                                                                                     |                                                                                      |
| C                     | -0.85721900    -0.58749400    0.09014600                                                                                                                                                                                                                    |                                                                                      |

| No.                   | Species                                                                             | Optimized Structure                                                                  |
|-----------------------|-------------------------------------------------------------------------------------|--------------------------------------------------------------------------------------|
| H                     | -1.95925500 1.11442600 0.89714800                                                   |                                                                                      |
| H                     | -2.34694200 0.79421500 -0.80729100                                                  |                                                                                      |
| H                     | 0.09350300 2.29139000 0.12361300                                                    |                                                                                      |
| H                     | -0.10915800 1.60609100 -1.50105800                                                  |                                                                                      |
| N                     | -1.22447500 -1.75866000 0.17140200                                                  |                                                                                      |
| C                     | 1.45514200 -0.52826400 -1.07089500                                                  |                                                                                      |
| H                     | 2.35007400 0.08829100 -1.20369700                                                   |                                                                                      |
| H                     | 1.77014900 -1.52927800 -0.76633200                                                  |                                                                                      |
| H                     | 0.95183000 -0.61286400 -2.03679700                                                  |                                                                                      |
| C                     | 1.21426100 0.18063100 1.33849200                                                    |                                                                                      |
| H                     | 2.10148600 0.81912400 1.27671400                                                    |                                                                                      |
| H                     | 0.54382300 0.60656000 2.08971300                                                    |                                                                                      |
| H                     | 1.52349200 -0.80838700 1.68459900                                                   |                                                                                      |
| 18                    | 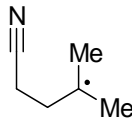   |    |
| Cartesian Coordinates |                                                                                     |                                                                                      |
| C                     | 1.09074800 -1.13032700 0.11681200                                                   |                                                                                      |
| C                     | -0.18212300 -0.80125300 0.94000300                                                  |                                                                                      |
| C                     | -1.18118000 0.03950000 0.21932800                                                   |                                                                                      |
| C                     | 1.84912900 0.05598700 -0.24581100                                                   |                                                                                      |
| H                     | 1.74672500 -1.79789900 0.68462900                                                   |                                                                                      |
| H                     | 0.81748600 -1.65730600 -0.80238500                                                  |                                                                                      |
| H                     | 0.12529600 -0.31639800 1.87099700                                                   |                                                                                      |
| H                     | -0.62645100 -1.76779700 1.21035200                                                  |                                                                                      |
| N                     | 2.43620500 1.00935200 -0.52124000                                                   |                                                                                      |
| C                     | -1.90220600 -0.54197500 -0.94672300                                                 |                                                                                      |
| H                     | -1.37504500 -0.36180000 -1.89812700                                                 |                                                                                      |
| H                     | -2.02806400 -1.62518000 -0.85162900                                                 |                                                                                      |
| H                     | -2.89532300 -0.09567900 -1.06333500                                                 |                                                                                      |
| C                     | -1.20630800 1.51309400 0.42698400                                                   |                                                                                      |
| H                     | -0.47774800 2.03357300 -0.21443500                                                  |                                                                                      |
| H                     | -2.18983800 1.93168400 0.19069200                                                   |                                                                                      |
| H                     | -0.95883300 1.78117400 1.45836500                                                   |                                                                                      |
| 19                    |  |  |
| Cartesian Coordinates |                                                                                     |                                                                                      |

| No.                   | Species                                                                             | Optimized Structure |
|-----------------------|-------------------------------------------------------------------------------------|---------------------|
| C                     | -1.32670000 -0.72537100 -0.24318600                                                 |                     |
| C                     | -1.32667100 0.72546300 0.24308200                                                   |                     |
| C                     | 0.06755100 1.23641200 -0.12953200                                                   |                     |
| C                     | 0.96344200 -0.00012200 0.00001800                                                   |                     |
| C                     | 0.06743500 -1.23641200 0.12966900                                                   |                     |
| H                     | -2.12593300 -1.32620700 0.19546100                                                  |                     |
| H                     | -1.45362700 -0.75180600 -1.33048000                                                 |                     |
| H                     | -1.45380000 0.75190300 1.33035100                                                   |                     |
| H                     | -2.12580700 1.32634600 -0.19568700                                                  |                     |
| H                     | 0.09757400 1.56204400 -1.17461500                                                   |                     |
| H                     | 0.43214000 2.06038700 0.48413700                                                    |                     |
| H                     | 0.43192500 -2.06062800 -0.48373900                                                  |                     |
| H                     | 0.09725100 -1.56184600 1.17483500                                                   |                     |
| N                     | 2.20427600 -0.00000200 -0.00008200                                                  |                     |
| 20                    | 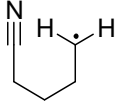   |                     |
| Cartesian Coordinates |                                                                                     |                     |
| C                     | 1.64103400 -0.12872600 -0.15305700                                                  |                     |
| N                     | 2.43064700 -0.89154900 0.19864600                                                   |                     |
| C                     | 0.62910700 0.83000000 -0.57163900                                                   |                     |
| H                     | 1.12111000 1.79145600 -0.74473800                                                   |                     |
| H                     | 0.22146500 0.49622100 -1.53156000                                                   |                     |
| C                     | -0.50209900 0.97751700 0.45516500                                                   |                     |
| H                     | -0.08087800 1.29720700 1.41213500                                                   |                     |
| H                     | -1.16159900 1.78131800 0.11206300                                                   |                     |
| C                     | -1.31293300 -0.30655900 0.64545800                                                  |                     |
| H                     | -2.01625300 -0.13752900 1.47754200                                                  |                     |
| H                     | -0.65226500 -1.11256400 0.98321500                                                  |                     |
| C                     | -2.05856300 -0.72495600 -0.56756600                                                 |                     |
| H                     | -2.58762600 0.01071700 -1.16420200                                                  |                     |
| H                     | -2.23775500 -1.76964400 -0.78514300                                                 |                     |
| 21                    |  |                     |
| Cartesian Coordinates |                                                                                     |                     |
| C                     | -1.53189600 -0.58985400 0.41722000                                                  |                     |
| C                     | -0.58856200 -1.25051200 -0.59133300                                                 |                     |

| No.                   | Species                                                                           | Optimized Structure                                                                |  |  |
|-----------------------|-----------------------------------------------------------------------------------|------------------------------------------------------------------------------------|--|--|
| C                     | 0.71056500 -0.43271800 -0.50646200                                                |                                                                                    |  |  |
| C                     | 0.21046400 0.98011800 -0.14128600                                                 |                                                                                    |  |  |
| C                     | -1.27286700 0.90544000 0.22705200                                                 |                                                                                    |  |  |
| H                     | -2.57882100 -0.85780700 0.26083400                                                |                                                                                    |  |  |
| H                     | -1.26864800 -0.89029500 1.43606000                                                |                                                                                    |  |  |
| H                     | -1.01367200 -1.16971600 -1.59712000                                               |                                                                                    |  |  |
| H                     | -0.41985700 -2.31161800 -0.39152700                                               |                                                                                    |  |  |
| H                     | 1.22774300 -0.38767200 -1.46764600                                                |                                                                                    |  |  |
| H                     | -1.50264200 1.52674600 1.09290600                                                 |                                                                                    |  |  |
| H                     | -1.84603700 1.29382500 -0.62168600                                                |                                                                                    |  |  |
| N                     | 0.91024500 2.00407700 -0.13710800                                                 |                                                                                    |  |  |
| C                     | 1.68022500 -0.94593300 0.55661000                                                 |                                                                                    |  |  |
| H                     | 2.53851500 -0.27806900 0.64777300                                                 |                                                                                    |  |  |
| H                     | 1.20229400 -1.01003600 1.53827600                                                 |                                                                                    |  |  |
| H                     | 2.04183900 -1.94314100 0.29108000                                                 |                                                                                    |  |  |
| 22                    | 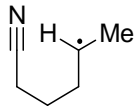 |  |  |  |
| Cartesian Coordinates |                                                                                   |                                                                                    |  |  |
| C                     | 1.59053700 0.62391200 0.07145600                                                  |                                                                                    |  |  |
| N                     | 1.68911600 1.77295800 0.05485500                                                  |                                                                                    |  |  |
| C                     | 1.50434300 -0.82940500 0.05045100                                                 |                                                                                    |  |  |
| H                     | 2.36122500 -1.19490100 -0.52402600                                                |                                                                                    |  |  |
| H                     | 1.63128400 -1.19785500 1.07412100                                                 |                                                                                    |  |  |
| C                     | 0.20021100 -1.36857700 -0.55210600                                                |                                                                                    |  |  |
| H                     | 0.03178200 -0.89751100 -1.52502500                                                |                                                                                    |  |  |
| H                     | 0.33898000 -2.43795500 -0.73969300                                                |                                                                                    |  |  |
| C                     | -1.03370300 -1.17569700 0.34924700                                                |                                                                                    |  |  |
| H                     | -0.86651500 -1.71583700 1.28772500                                                |                                                                                    |  |  |
| H                     | -1.87368500 -1.67873900 -0.15203300                                               |                                                                                    |  |  |
| C                     | -1.39730700 0.23928900 0.63162800                                                 |                                                                                    |  |  |
| H                     | -1.18233900 0.65509000 1.60925000                                                 |                                                                                    |  |  |
| C                     | -1.89496900 1.15049400 -0.42876200                                                |                                                                                    |  |  |
| H                     | -2.67176400 1.82291200 -0.04972000                                                |                                                                                    |  |  |
| H                     | -1.09498500 1.79660000 -0.81965900                                                |                                                                                    |  |  |
| H                     | -2.31246000 0.59740400 -1.27640100                                                |                                                                                    |  |  |

| No.                                                                                                                                                                                                                                                                                                                                                                                                                                                                                                                                                                                                                                                                                                                                                                                                                                                                                                                                                                                                                                                                                                                                                                                                                                                                                                                                                                                                                                                                                                                                                                                                                                                                                                                                                                                                                                                                                                                                                                                                                                    | Species                                                                             | Optimized Structure                                                                  |             |            |             |             |   |            |             |             |   |            |             |             |   |            |             |             |   |            |             |             |   |            |             |             |   |            |             |             |   |            |             |            |   |            |             |            |   |            |            |             |   |            |            |             |   |            |            |            |   |            |            |            |   |             |             |            |   |             |            |            |   |             |             |            |   |             |            |             |   |             |            |            |   |             |             |             |   |             |             |            |   |             |             |             |   |             |            |             |   |             |             |             |   |             |             |             |
|----------------------------------------------------------------------------------------------------------------------------------------------------------------------------------------------------------------------------------------------------------------------------------------------------------------------------------------------------------------------------------------------------------------------------------------------------------------------------------------------------------------------------------------------------------------------------------------------------------------------------------------------------------------------------------------------------------------------------------------------------------------------------------------------------------------------------------------------------------------------------------------------------------------------------------------------------------------------------------------------------------------------------------------------------------------------------------------------------------------------------------------------------------------------------------------------------------------------------------------------------------------------------------------------------------------------------------------------------------------------------------------------------------------------------------------------------------------------------------------------------------------------------------------------------------------------------------------------------------------------------------------------------------------------------------------------------------------------------------------------------------------------------------------------------------------------------------------------------------------------------------------------------------------------------------------------------------------------------------------------------------------------------------------|-------------------------------------------------------------------------------------|--------------------------------------------------------------------------------------|-------------|------------|-------------|-------------|---|------------|-------------|-------------|---|------------|-------------|-------------|---|------------|-------------|-------------|---|------------|-------------|-------------|---|------------|-------------|-------------|---|------------|-------------|-------------|---|------------|-------------|------------|---|------------|-------------|------------|---|------------|------------|-------------|---|------------|------------|-------------|---|------------|------------|------------|---|------------|------------|------------|---|-------------|-------------|------------|---|-------------|------------|------------|---|-------------|-------------|------------|---|-------------|------------|-------------|---|-------------|------------|------------|---|-------------|-------------|-------------|---|-------------|-------------|------------|---|-------------|-------------|-------------|---|-------------|------------|-------------|---|-------------|-------------|-------------|---|-------------|-------------|-------------|
| 23                                                                                                                                                                                                                                                                                                                                                                                                                                                                                                                                                                                                                                                                                                                                                                                                                                                                                                                                                                                                                                                                                                                                                                                                                                                                                                                                                                                                                                                                                                                                                                                                                                                                                                                                                                                                                                                                                                                                                                                                                                     | 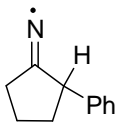   |    |             |            |             |             |   |            |             |             |   |            |             |             |   |            |             |             |   |            |             |             |   |            |             |             |   |            |             |             |   |            |             |            |   |            |             |            |   |            |            |             |   |            |            |             |   |            |            |            |   |            |            |            |   |             |             |            |   |             |            |            |   |             |             |            |   |             |            |             |   |             |            |            |   |             |             |             |   |             |             |            |   |             |             |             |   |             |            |             |   |             |             |             |   |             |             |             |
| <p>Cartesian Coordinates</p> <table border="0"> <tbody> <tr><td>C</td><td>2.14936000</td><td>-1.32862000</td><td>-0.62311900</td></tr> <tr><td>C</td><td>1.68387300</td><td>-1.24033400</td><td>0.83215000</td></tr> <tr><td>C</td><td>0.87874600</td><td>0.06192300</td><td>0.89666100</td></tr> <tr><td>C</td><td>1.71028300</td><td>0.98114900</td><td>-0.02681700</td></tr> <tr><td>C</td><td>2.54681700</td><td>0.11074700</td><td>-0.97002800</td></tr> <tr><td>H</td><td>2.97218300</td><td>-2.03237100</td><td>-0.76320400</td></tr> <tr><td>H</td><td>1.32392000</td><td>-1.65463700</td><td>-1.26170100</td></tr> <tr><td>H</td><td>2.55305800</td><td>-1.14322900</td><td>1.49067800</td></tr> <tr><td>H</td><td>1.12594400</td><td>-2.11409200</td><td>1.17235400</td></tr> <tr><td>H</td><td>2.36863800</td><td>0.38501600</td><td>-2.01058500</td></tr> <tr><td>H</td><td>3.60240300</td><td>0.30021700</td><td>-0.75645000</td></tr> <tr><td>N</td><td>1.72394400</td><td>2.21924100</td><td>0.03368500</td></tr> <tr><td>H</td><td>0.87453600</td><td>0.48880600</td><td>1.90263600</td></tr> <tr><td>C</td><td>-0.56155000</td><td>-0.01073200</td><td>0.40726900</td></tr> <tr><td>C</td><td>-1.27708900</td><td>1.17700600</td><td>0.23444400</td></tr> <tr><td>C</td><td>-1.21660000</td><td>-1.21678100</td><td>0.16426600</td></tr> <tr><td>C</td><td>-2.60655700</td><td>1.15897300</td><td>-0.15982500</td></tr> <tr><td>H</td><td>-0.77267600</td><td>2.12405500</td><td>0.39738200</td></tr> <tr><td>C</td><td>-2.54929000</td><td>-1.23722600</td><td>-0.23612900</td></tr> <tr><td>H</td><td>-0.69558400</td><td>-2.15891700</td><td>0.28734100</td></tr> <tr><td>C</td><td>-3.25023400</td><td>-0.05094600</td><td>-0.39823600</td></tr> <tr><td>H</td><td>-3.14081700</td><td>2.09414500</td><td>-0.28616000</td></tr> <tr><td>H</td><td>-3.03751500</td><td>-2.18780800</td><td>-0.42108700</td></tr> <tr><td>H</td><td>-4.28825200</td><td>-0.06683200</td><td>-0.71081700</td></tr> </tbody> </table> |                                                                                     |                                                                                      | C           | 2.14936000 | -1.32862000 | -0.62311900 | C | 1.68387300 | -1.24033400 | 0.83215000  | C | 0.87874600 | 0.06192300  | 0.89666100  | C | 1.71028300 | 0.98114900  | -0.02681700 | C | 2.54681700 | 0.11074700  | -0.97002800 | H | 2.97218300 | -2.03237100 | -0.76320400 | H | 1.32392000 | -1.65463700 | -1.26170100 | H | 2.55305800 | -1.14322900 | 1.49067800 | H | 1.12594400 | -2.11409200 | 1.17235400 | H | 2.36863800 | 0.38501600 | -2.01058500 | H | 3.60240300 | 0.30021700 | -0.75645000 | N | 1.72394400 | 2.21924100 | 0.03368500 | H | 0.87453600 | 0.48880600 | 1.90263600 | C | -0.56155000 | -0.01073200 | 0.40726900 | C | -1.27708900 | 1.17700600 | 0.23444400 | C | -1.21660000 | -1.21678100 | 0.16426600 | C | -2.60655700 | 1.15897300 | -0.15982500 | H | -0.77267600 | 2.12405500 | 0.39738200 | C | -2.54929000 | -1.23722600 | -0.23612900 | H | -0.69558400 | -2.15891700 | 0.28734100 | C | -3.25023400 | -0.05094600 | -0.39823600 | H | -3.14081700 | 2.09414500 | -0.28616000 | H | -3.03751500 | -2.18780800 | -0.42108700 | H | -4.28825200 | -0.06683200 | -0.71081700 |
| C                                                                                                                                                                                                                                                                                                                                                                                                                                                                                                                                                                                                                                                                                                                                                                                                                                                                                                                                                                                                                                                                                                                                                                                                                                                                                                                                                                                                                                                                                                                                                                                                                                                                                                                                                                                                                                                                                                                                                                                                                                      | 2.14936000                                                                          | -1.32862000                                                                          | -0.62311900 |            |             |             |   |            |             |             |   |            |             |             |   |            |             |             |   |            |             |             |   |            |             |             |   |            |             |             |   |            |             |            |   |            |             |            |   |            |            |             |   |            |            |             |   |            |            |            |   |            |            |            |   |             |             |            |   |             |            |            |   |             |             |            |   |             |            |             |   |             |            |            |   |             |             |             |   |             |             |            |   |             |             |             |   |             |            |             |   |             |             |             |   |             |             |             |
| C                                                                                                                                                                                                                                                                                                                                                                                                                                                                                                                                                                                                                                                                                                                                                                                                                                                                                                                                                                                                                                                                                                                                                                                                                                                                                                                                                                                                                                                                                                                                                                                                                                                                                                                                                                                                                                                                                                                                                                                                                                      | 1.68387300                                                                          | -1.24033400                                                                          | 0.83215000  |            |             |             |   |            |             |             |   |            |             |             |   |            |             |             |   |            |             |             |   |            |             |             |   |            |             |             |   |            |             |            |   |            |             |            |   |            |            |             |   |            |            |             |   |            |            |            |   |            |            |            |   |             |             |            |   |             |            |            |   |             |             |            |   |             |            |             |   |             |            |            |   |             |             |             |   |             |             |            |   |             |             |             |   |             |            |             |   |             |             |             |   |             |             |             |
| C                                                                                                                                                                                                                                                                                                                                                                                                                                                                                                                                                                                                                                                                                                                                                                                                                                                                                                                                                                                                                                                                                                                                                                                                                                                                                                                                                                                                                                                                                                                                                                                                                                                                                                                                                                                                                                                                                                                                                                                                                                      | 0.87874600                                                                          | 0.06192300                                                                           | 0.89666100  |            |             |             |   |            |             |             |   |            |             |             |   |            |             |             |   |            |             |             |   |            |             |             |   |            |             |             |   |            |             |            |   |            |             |            |   |            |            |             |   |            |            |             |   |            |            |            |   |            |            |            |   |             |             |            |   |             |            |            |   |             |             |            |   |             |            |             |   |             |            |            |   |             |             |             |   |             |             |            |   |             |             |             |   |             |            |             |   |             |             |             |   |             |             |             |
| C                                                                                                                                                                                                                                                                                                                                                                                                                                                                                                                                                                                                                                                                                                                                                                                                                                                                                                                                                                                                                                                                                                                                                                                                                                                                                                                                                                                                                                                                                                                                                                                                                                                                                                                                                                                                                                                                                                                                                                                                                                      | 1.71028300                                                                          | 0.98114900                                                                           | -0.02681700 |            |             |             |   |            |             |             |   |            |             |             |   |            |             |             |   |            |             |             |   |            |             |             |   |            |             |             |   |            |             |            |   |            |             |            |   |            |            |             |   |            |            |             |   |            |            |            |   |            |            |            |   |             |             |            |   |             |            |            |   |             |             |            |   |             |            |             |   |             |            |            |   |             |             |             |   |             |             |            |   |             |             |             |   |             |            |             |   |             |             |             |   |             |             |             |
| C                                                                                                                                                                                                                                                                                                                                                                                                                                                                                                                                                                                                                                                                                                                                                                                                                                                                                                                                                                                                                                                                                                                                                                                                                                                                                                                                                                                                                                                                                                                                                                                                                                                                                                                                                                                                                                                                                                                                                                                                                                      | 2.54681700                                                                          | 0.11074700                                                                           | -0.97002800 |            |             |             |   |            |             |             |   |            |             |             |   |            |             |             |   |            |             |             |   |            |             |             |   |            |             |             |   |            |             |            |   |            |             |            |   |            |            |             |   |            |            |             |   |            |            |            |   |            |            |            |   |             |             |            |   |             |            |            |   |             |             |            |   |             |            |             |   |             |            |            |   |             |             |             |   |             |             |            |   |             |             |             |   |             |            |             |   |             |             |             |   |             |             |             |
| H                                                                                                                                                                                                                                                                                                                                                                                                                                                                                                                                                                                                                                                                                                                                                                                                                                                                                                                                                                                                                                                                                                                                                                                                                                                                                                                                                                                                                                                                                                                                                                                                                                                                                                                                                                                                                                                                                                                                                                                                                                      | 2.97218300                                                                          | -2.03237100                                                                          | -0.76320400 |            |             |             |   |            |             |             |   |            |             |             |   |            |             |             |   |            |             |             |   |            |             |             |   |            |             |             |   |            |             |            |   |            |             |            |   |            |            |             |   |            |            |             |   |            |            |            |   |            |            |            |   |             |             |            |   |             |            |            |   |             |             |            |   |             |            |             |   |             |            |            |   |             |             |             |   |             |             |            |   |             |             |             |   |             |            |             |   |             |             |             |   |             |             |             |
| H                                                                                                                                                                                                                                                                                                                                                                                                                                                                                                                                                                                                                                                                                                                                                                                                                                                                                                                                                                                                                                                                                                                                                                                                                                                                                                                                                                                                                                                                                                                                                                                                                                                                                                                                                                                                                                                                                                                                                                                                                                      | 1.32392000                                                                          | -1.65463700                                                                          | -1.26170100 |            |             |             |   |            |             |             |   |            |             |             |   |            |             |             |   |            |             |             |   |            |             |             |   |            |             |             |   |            |             |            |   |            |             |            |   |            |            |             |   |            |            |             |   |            |            |            |   |            |            |            |   |             |             |            |   |             |            |            |   |             |             |            |   |             |            |             |   |             |            |            |   |             |             |             |   |             |             |            |   |             |             |             |   |             |            |             |   |             |             |             |   |             |             |             |
| H                                                                                                                                                                                                                                                                                                                                                                                                                                                                                                                                                                                                                                                                                                                                                                                                                                                                                                                                                                                                                                                                                                                                                                                                                                                                                                                                                                                                                                                                                                                                                                                                                                                                                                                                                                                                                                                                                                                                                                                                                                      | 2.55305800                                                                          | -1.14322900                                                                          | 1.49067800  |            |             |             |   |            |             |             |   |            |             |             |   |            |             |             |   |            |             |             |   |            |             |             |   |            |             |             |   |            |             |            |   |            |             |            |   |            |            |             |   |            |            |             |   |            |            |            |   |            |            |            |   |             |             |            |   |             |            |            |   |             |             |            |   |             |            |             |   |             |            |            |   |             |             |             |   |             |             |            |   |             |             |             |   |             |            |             |   |             |             |             |   |             |             |             |
| H                                                                                                                                                                                                                                                                                                                                                                                                                                                                                                                                                                                                                                                                                                                                                                                                                                                                                                                                                                                                                                                                                                                                                                                                                                                                                                                                                                                                                                                                                                                                                                                                                                                                                                                                                                                                                                                                                                                                                                                                                                      | 1.12594400                                                                          | -2.11409200                                                                          | 1.17235400  |            |             |             |   |            |             |             |   |            |             |             |   |            |             |             |   |            |             |             |   |            |             |             |   |            |             |             |   |            |             |            |   |            |             |            |   |            |            |             |   |            |            |             |   |            |            |            |   |            |            |            |   |             |             |            |   |             |            |            |   |             |             |            |   |             |            |             |   |             |            |            |   |             |             |             |   |             |             |            |   |             |             |             |   |             |            |             |   |             |             |             |   |             |             |             |
| H                                                                                                                                                                                                                                                                                                                                                                                                                                                                                                                                                                                                                                                                                                                                                                                                                                                                                                                                                                                                                                                                                                                                                                                                                                                                                                                                                                                                                                                                                                                                                                                                                                                                                                                                                                                                                                                                                                                                                                                                                                      | 2.36863800                                                                          | 0.38501600                                                                           | -2.01058500 |            |             |             |   |            |             |             |   |            |             |             |   |            |             |             |   |            |             |             |   |            |             |             |   |            |             |             |   |            |             |            |   |            |             |            |   |            |            |             |   |            |            |             |   |            |            |            |   |            |            |            |   |             |             |            |   |             |            |            |   |             |             |            |   |             |            |             |   |             |            |            |   |             |             |             |   |             |             |            |   |             |             |             |   |             |            |             |   |             |             |             |   |             |             |             |
| H                                                                                                                                                                                                                                                                                                                                                                                                                                                                                                                                                                                                                                                                                                                                                                                                                                                                                                                                                                                                                                                                                                                                                                                                                                                                                                                                                                                                                                                                                                                                                                                                                                                                                                                                                                                                                                                                                                                                                                                                                                      | 3.60240300                                                                          | 0.30021700                                                                           | -0.75645000 |            |             |             |   |            |             |             |   |            |             |             |   |            |             |             |   |            |             |             |   |            |             |             |   |            |             |             |   |            |             |            |   |            |             |            |   |            |            |             |   |            |            |             |   |            |            |            |   |            |            |            |   |             |             |            |   |             |            |            |   |             |             |            |   |             |            |             |   |             |            |            |   |             |             |             |   |             |             |            |   |             |             |             |   |             |            |             |   |             |             |             |   |             |             |             |
| N                                                                                                                                                                                                                                                                                                                                                                                                                                                                                                                                                                                                                                                                                                                                                                                                                                                                                                                                                                                                                                                                                                                                                                                                                                                                                                                                                                                                                                                                                                                                                                                                                                                                                                                                                                                                                                                                                                                                                                                                                                      | 1.72394400                                                                          | 2.21924100                                                                           | 0.03368500  |            |             |             |   |            |             |             |   |            |             |             |   |            |             |             |   |            |             |             |   |            |             |             |   |            |             |             |   |            |             |            |   |            |             |            |   |            |            |             |   |            |            |             |   |            |            |            |   |            |            |            |   |             |             |            |   |             |            |            |   |             |             |            |   |             |            |             |   |             |            |            |   |             |             |             |   |             |             |            |   |             |             |             |   |             |            |             |   |             |             |             |   |             |             |             |
| H                                                                                                                                                                                                                                                                                                                                                                                                                                                                                                                                                                                                                                                                                                                                                                                                                                                                                                                                                                                                                                                                                                                                                                                                                                                                                                                                                                                                                                                                                                                                                                                                                                                                                                                                                                                                                                                                                                                                                                                                                                      | 0.87453600                                                                          | 0.48880600                                                                           | 1.90263600  |            |             |             |   |            |             |             |   |            |             |             |   |            |             |             |   |            |             |             |   |            |             |             |   |            |             |             |   |            |             |            |   |            |             |            |   |            |            |             |   |            |            |             |   |            |            |            |   |            |            |            |   |             |             |            |   |             |            |            |   |             |             |            |   |             |            |             |   |             |            |            |   |             |             |             |   |             |             |            |   |             |             |             |   |             |            |             |   |             |             |             |   |             |             |             |
| C                                                                                                                                                                                                                                                                                                                                                                                                                                                                                                                                                                                                                                                                                                                                                                                                                                                                                                                                                                                                                                                                                                                                                                                                                                                                                                                                                                                                                                                                                                                                                                                                                                                                                                                                                                                                                                                                                                                                                                                                                                      | -0.56155000                                                                         | -0.01073200                                                                          | 0.40726900  |            |             |             |   |            |             |             |   |            |             |             |   |            |             |             |   |            |             |             |   |            |             |             |   |            |             |             |   |            |             |            |   |            |             |            |   |            |            |             |   |            |            |             |   |            |            |            |   |            |            |            |   |             |             |            |   |             |            |            |   |             |             |            |   |             |            |             |   |             |            |            |   |             |             |             |   |             |             |            |   |             |             |             |   |             |            |             |   |             |             |             |   |             |             |             |
| C                                                                                                                                                                                                                                                                                                                                                                                                                                                                                                                                                                                                                                                                                                                                                                                                                                                                                                                                                                                                                                                                                                                                                                                                                                                                                                                                                                                                                                                                                                                                                                                                                                                                                                                                                                                                                                                                                                                                                                                                                                      | -1.27708900                                                                         | 1.17700600                                                                           | 0.23444400  |            |             |             |   |            |             |             |   |            |             |             |   |            |             |             |   |            |             |             |   |            |             |             |   |            |             |             |   |            |             |            |   |            |             |            |   |            |            |             |   |            |            |             |   |            |            |            |   |            |            |            |   |             |             |            |   |             |            |            |   |             |             |            |   |             |            |             |   |             |            |            |   |             |             |             |   |             |             |            |   |             |             |             |   |             |            |             |   |             |             |             |   |             |             |             |
| C                                                                                                                                                                                                                                                                                                                                                                                                                                                                                                                                                                                                                                                                                                                                                                                                                                                                                                                                                                                                                                                                                                                                                                                                                                                                                                                                                                                                                                                                                                                                                                                                                                                                                                                                                                                                                                                                                                                                                                                                                                      | -1.21660000                                                                         | -1.21678100                                                                          | 0.16426600  |            |             |             |   |            |             |             |   |            |             |             |   |            |             |             |   |            |             |             |   |            |             |             |   |            |             |             |   |            |             |            |   |            |             |            |   |            |            |             |   |            |            |             |   |            |            |            |   |            |            |            |   |             |             |            |   |             |            |            |   |             |             |            |   |             |            |             |   |             |            |            |   |             |             |             |   |             |             |            |   |             |             |             |   |             |            |             |   |             |             |             |   |             |             |             |
| C                                                                                                                                                                                                                                                                                                                                                                                                                                                                                                                                                                                                                                                                                                                                                                                                                                                                                                                                                                                                                                                                                                                                                                                                                                                                                                                                                                                                                                                                                                                                                                                                                                                                                                                                                                                                                                                                                                                                                                                                                                      | -2.60655700                                                                         | 1.15897300                                                                           | -0.15982500 |            |             |             |   |            |             |             |   |            |             |             |   |            |             |             |   |            |             |             |   |            |             |             |   |            |             |             |   |            |             |            |   |            |             |            |   |            |            |             |   |            |            |             |   |            |            |            |   |            |            |            |   |             |             |            |   |             |            |            |   |             |             |            |   |             |            |             |   |             |            |            |   |             |             |             |   |             |             |            |   |             |             |             |   |             |            |             |   |             |             |             |   |             |             |             |
| H                                                                                                                                                                                                                                                                                                                                                                                                                                                                                                                                                                                                                                                                                                                                                                                                                                                                                                                                                                                                                                                                                                                                                                                                                                                                                                                                                                                                                                                                                                                                                                                                                                                                                                                                                                                                                                                                                                                                                                                                                                      | -0.77267600                                                                         | 2.12405500                                                                           | 0.39738200  |            |             |             |   |            |             |             |   |            |             |             |   |            |             |             |   |            |             |             |   |            |             |             |   |            |             |             |   |            |             |            |   |            |             |            |   |            |            |             |   |            |            |             |   |            |            |            |   |            |            |            |   |             |             |            |   |             |            |            |   |             |             |            |   |             |            |             |   |             |            |            |   |             |             |             |   |             |             |            |   |             |             |             |   |             |            |             |   |             |             |             |   |             |             |             |
| C                                                                                                                                                                                                                                                                                                                                                                                                                                                                                                                                                                                                                                                                                                                                                                                                                                                                                                                                                                                                                                                                                                                                                                                                                                                                                                                                                                                                                                                                                                                                                                                                                                                                                                                                                                                                                                                                                                                                                                                                                                      | -2.54929000                                                                         | -1.23722600                                                                          | -0.23612900 |            |             |             |   |            |             |             |   |            |             |             |   |            |             |             |   |            |             |             |   |            |             |             |   |            |             |             |   |            |             |            |   |            |             |            |   |            |            |             |   |            |            |             |   |            |            |            |   |            |            |            |   |             |             |            |   |             |            |            |   |             |             |            |   |             |            |             |   |             |            |            |   |             |             |             |   |             |             |            |   |             |             |             |   |             |            |             |   |             |             |             |   |             |             |             |
| H                                                                                                                                                                                                                                                                                                                                                                                                                                                                                                                                                                                                                                                                                                                                                                                                                                                                                                                                                                                                                                                                                                                                                                                                                                                                                                                                                                                                                                                                                                                                                                                                                                                                                                                                                                                                                                                                                                                                                                                                                                      | -0.69558400                                                                         | -2.15891700                                                                          | 0.28734100  |            |             |             |   |            |             |             |   |            |             |             |   |            |             |             |   |            |             |             |   |            |             |             |   |            |             |             |   |            |             |            |   |            |             |            |   |            |            |             |   |            |            |             |   |            |            |            |   |            |            |            |   |             |             |            |   |             |            |            |   |             |             |            |   |             |            |             |   |             |            |            |   |             |             |             |   |             |             |            |   |             |             |             |   |             |            |             |   |             |             |             |   |             |             |             |
| C                                                                                                                                                                                                                                                                                                                                                                                                                                                                                                                                                                                                                                                                                                                                                                                                                                                                                                                                                                                                                                                                                                                                                                                                                                                                                                                                                                                                                                                                                                                                                                                                                                                                                                                                                                                                                                                                                                                                                                                                                                      | -3.25023400                                                                         | -0.05094600                                                                          | -0.39823600 |            |             |             |   |            |             |             |   |            |             |             |   |            |             |             |   |            |             |             |   |            |             |             |   |            |             |             |   |            |             |            |   |            |             |            |   |            |            |             |   |            |            |             |   |            |            |            |   |            |            |            |   |             |             |            |   |             |            |            |   |             |             |            |   |             |            |             |   |             |            |            |   |             |             |             |   |             |             |            |   |             |             |             |   |             |            |             |   |             |             |             |   |             |             |             |
| H                                                                                                                                                                                                                                                                                                                                                                                                                                                                                                                                                                                                                                                                                                                                                                                                                                                                                                                                                                                                                                                                                                                                                                                                                                                                                                                                                                                                                                                                                                                                                                                                                                                                                                                                                                                                                                                                                                                                                                                                                                      | -3.14081700                                                                         | 2.09414500                                                                           | -0.28616000 |            |             |             |   |            |             |             |   |            |             |             |   |            |             |             |   |            |             |             |   |            |             |             |   |            |             |             |   |            |             |            |   |            |             |            |   |            |            |             |   |            |            |             |   |            |            |            |   |            |            |            |   |             |             |            |   |             |            |            |   |             |             |            |   |             |            |             |   |             |            |            |   |             |             |             |   |             |             |            |   |             |             |             |   |             |            |             |   |             |             |             |   |             |             |             |
| H                                                                                                                                                                                                                                                                                                                                                                                                                                                                                                                                                                                                                                                                                                                                                                                                                                                                                                                                                                                                                                                                                                                                                                                                                                                                                                                                                                                                                                                                                                                                                                                                                                                                                                                                                                                                                                                                                                                                                                                                                                      | -3.03751500                                                                         | -2.18780800                                                                          | -0.42108700 |            |             |             |   |            |             |             |   |            |             |             |   |            |             |             |   |            |             |             |   |            |             |             |   |            |             |             |   |            |             |            |   |            |             |            |   |            |            |             |   |            |            |             |   |            |            |            |   |            |            |            |   |             |             |            |   |             |            |            |   |             |             |            |   |             |            |             |   |             |            |            |   |             |             |             |   |             |             |            |   |             |             |             |   |             |            |             |   |             |             |             |   |             |             |             |
| H                                                                                                                                                                                                                                                                                                                                                                                                                                                                                                                                                                                                                                                                                                                                                                                                                                                                                                                                                                                                                                                                                                                                                                                                                                                                                                                                                                                                                                                                                                                                                                                                                                                                                                                                                                                                                                                                                                                                                                                                                                      | -4.28825200                                                                         | -0.06683200                                                                          | -0.71081700 |            |             |             |   |            |             |             |   |            |             |             |   |            |             |             |   |            |             |             |   |            |             |             |   |            |             |             |   |            |             |            |   |            |             |            |   |            |            |             |   |            |            |             |   |            |            |            |   |            |            |            |   |             |             |            |   |             |            |            |   |             |             |            |   |             |            |             |   |             |            |            |   |             |             |             |   |             |             |            |   |             |             |             |   |             |            |             |   |             |             |             |   |             |             |             |
| 24                                                                                                                                                                                                                                                                                                                                                                                                                                                                                                                                                                                                                                                                                                                                                                                                                                                                                                                                                                                                                                                                                                                                                                                                                                                                                                                                                                                                                                                                                                                                                                                                                                                                                                                                                                                                                                                                                                                                                                                                                                     |  |  |             |            |             |             |   |            |             |             |   |            |             |             |   |            |             |             |   |            |             |             |   |            |             |             |   |            |             |             |   |            |             |            |   |            |             |            |   |            |            |             |   |            |            |             |   |            |            |            |   |            |            |            |   |             |             |            |   |             |            |            |   |             |             |            |   |             |            |             |   |             |            |            |   |             |             |             |   |             |             |            |   |             |             |             |   |             |            |             |   |             |             |             |   |             |             |             |
| <p>Cartesian Coordinates</p> <table border="0"> <tbody> <tr><td>C</td><td>2.78568900</td><td>1.14707400</td><td>-0.47638700</td></tr> <tr><td>N</td><td>2.44541300</td><td>2.24790300</td><td>-0.51823700</td></tr> <tr><td>C</td><td>3.25729400</td><td>-0.23037800</td><td>-0.43939900</td></tr> <tr><td>H</td><td>3.86628800</td><td>-0.38894100</td><td>-1.33489900</td></tr> <tr><td>H</td><td>3.93144700</td><td>-0.33136900</td><td>0.41838500</td></tr> <tr><td>C</td><td>2.15478500</td><td>-1.29407800</td><td>-0.36931300</td></tr> </tbody> </table>                                                                                                                                                                                                                                                                                                                                                                                                                                                                                                                                                                                                                                                                                                                                                                                                                                                                                                                                                                                                                                                                                                                                                                                                                                                                                                                                                                                                                                                                       |                                                                                     |                                                                                      | C           | 2.78568900 | 1.14707400  | -0.47638700 | N | 2.44541300 | 2.24790300  | -0.51823700 | C | 3.25729400 | -0.23037800 | -0.43939900 | H | 3.86628800 | -0.38894100 | -1.33489900 | H | 3.93144700 | -0.33136900 | 0.41838500  | C | 2.15478500 | -1.29407800 | -0.36931300 |   |            |             |             |   |            |             |            |   |            |             |            |   |            |            |             |   |            |            |             |   |            |            |            |   |            |            |            |   |             |             |            |   |             |            |            |   |             |             |            |   |             |            |             |   |             |            |            |   |             |             |             |   |             |             |            |   |             |             |             |   |             |            |             |   |             |             |             |   |             |             |             |
| C                                                                                                                                                                                                                                                                                                                                                                                                                                                                                                                                                                                                                                                                                                                                                                                                                                                                                                                                                                                                                                                                                                                                                                                                                                                                                                                                                                                                                                                                                                                                                                                                                                                                                                                                                                                                                                                                                                                                                                                                                                      | 2.78568900                                                                          | 1.14707400                                                                           | -0.47638700 |            |             |             |   |            |             |             |   |            |             |             |   |            |             |             |   |            |             |             |   |            |             |             |   |            |             |             |   |            |             |            |   |            |             |            |   |            |            |             |   |            |            |             |   |            |            |            |   |            |            |            |   |             |             |            |   |             |            |            |   |             |             |            |   |             |            |             |   |             |            |            |   |             |             |             |   |             |             |            |   |             |             |             |   |             |            |             |   |             |             |             |   |             |             |             |
| N                                                                                                                                                                                                                                                                                                                                                                                                                                                                                                                                                                                                                                                                                                                                                                                                                                                                                                                                                                                                                                                                                                                                                                                                                                                                                                                                                                                                                                                                                                                                                                                                                                                                                                                                                                                                                                                                                                                                                                                                                                      | 2.44541300                                                                          | 2.24790300                                                                           | -0.51823700 |            |             |             |   |            |             |             |   |            |             |             |   |            |             |             |   |            |             |             |   |            |             |             |   |            |             |             |   |            |             |            |   |            |             |            |   |            |            |             |   |            |            |             |   |            |            |            |   |            |            |            |   |             |             |            |   |             |            |            |   |             |             |            |   |             |            |             |   |             |            |            |   |             |             |             |   |             |             |            |   |             |             |             |   |             |            |             |   |             |             |             |   |             |             |             |
| C                                                                                                                                                                                                                                                                                                                                                                                                                                                                                                                                                                                                                                                                                                                                                                                                                                                                                                                                                                                                                                                                                                                                                                                                                                                                                                                                                                                                                                                                                                                                                                                                                                                                                                                                                                                                                                                                                                                                                                                                                                      | 3.25729400                                                                          | -0.23037800                                                                          | -0.43939900 |            |             |             |   |            |             |             |   |            |             |             |   |            |             |             |   |            |             |             |   |            |             |             |   |            |             |             |   |            |             |            |   |            |             |            |   |            |            |             |   |            |            |             |   |            |            |            |   |            |            |            |   |             |             |            |   |             |            |            |   |             |             |            |   |             |            |             |   |             |            |            |   |             |             |             |   |             |             |            |   |             |             |             |   |             |            |             |   |             |             |             |   |             |             |             |
| H                                                                                                                                                                                                                                                                                                                                                                                                                                                                                                                                                                                                                                                                                                                                                                                                                                                                                                                                                                                                                                                                                                                                                                                                                                                                                                                                                                                                                                                                                                                                                                                                                                                                                                                                                                                                                                                                                                                                                                                                                                      | 3.86628800                                                                          | -0.38894100                                                                          | -1.33489900 |            |             |             |   |            |             |             |   |            |             |             |   |            |             |             |   |            |             |             |   |            |             |             |   |            |             |             |   |            |             |            |   |            |             |            |   |            |            |             |   |            |            |             |   |            |            |            |   |            |            |            |   |             |             |            |   |             |            |            |   |             |             |            |   |             |            |             |   |             |            |            |   |             |             |             |   |             |             |            |   |             |             |             |   |             |            |             |   |             |             |             |   |             |             |             |
| H                                                                                                                                                                                                                                                                                                                                                                                                                                                                                                                                                                                                                                                                                                                                                                                                                                                                                                                                                                                                                                                                                                                                                                                                                                                                                                                                                                                                                                                                                                                                                                                                                                                                                                                                                                                                                                                                                                                                                                                                                                      | 3.93144700                                                                          | -0.33136900                                                                          | 0.41838500  |            |             |             |   |            |             |             |   |            |             |             |   |            |             |             |   |            |             |             |   |            |             |             |   |            |             |             |   |            |             |            |   |            |             |            |   |            |            |             |   |            |            |             |   |            |            |            |   |            |            |            |   |             |             |            |   |             |            |            |   |             |             |            |   |             |            |             |   |             |            |            |   |             |             |             |   |             |             |            |   |             |             |             |   |             |            |             |   |             |             |             |   |             |             |             |
| C                                                                                                                                                                                                                                                                                                                                                                                                                                                                                                                                                                                                                                                                                                                                                                                                                                                                                                                                                                                                                                                                                                                                                                                                                                                                                                                                                                                                                                                                                                                                                                                                                                                                                                                                                                                                                                                                                                                                                                                                                                      | 2.15478500                                                                          | -1.29407800                                                                          | -0.36931300 |            |             |             |   |            |             |             |   |            |             |             |   |            |             |             |   |            |             |             |   |            |             |             |   |            |             |             |   |            |             |            |   |            |             |            |   |            |            |             |   |            |            |             |   |            |            |            |   |            |            |            |   |             |             |            |   |             |            |            |   |             |             |            |   |             |            |             |   |             |            |            |   |             |             |             |   |             |             |            |   |             |             |             |   |             |            |             |   |             |             |             |   |             |             |             |

| No.                   | Species                                                                            | Optimized Structure                                                                 |  |  |
|-----------------------|------------------------------------------------------------------------------------|-------------------------------------------------------------------------------------|--|--|
| H                     | 1.48222600 -1.17931900 -1.22372200                                                 |                                                                                     |  |  |
| H                     | 2.64474400 -2.26732500 -0.47442800                                                 |                                                                                     |  |  |
| C                     | 1.33871500 -1.28442300 0.93776000                                                  |                                                                                     |  |  |
| H                     | 2.03432500 -1.30306800 1.78433900                                                  |                                                                                     |  |  |
| H                     | 0.77869600 -2.22529600 0.98471200                                                  |                                                                                     |  |  |
| C                     | 0.40988700 -0.12805900 1.07734400                                                  |                                                                                     |  |  |
| H                     | 0.76003300 0.75012200 1.60819500                                                   |                                                                                     |  |  |
| C                     | -0.88606400 -0.06319900 0.51212400                                                 |                                                                                     |  |  |
| C                     | -1.65812000 1.11520800 0.66185500                                                  |                                                                                     |  |  |
| C                     | -1.47031900 -1.13171500 -0.21052000                                                |                                                                                     |  |  |
| C                     | -2.92757600 1.21442500 0.12916100                                                  |                                                                                     |  |  |
| H                     | -1.22779100 1.95220500 1.20141200                                                  |                                                                                     |  |  |
| C                     | -2.74327600 -1.02274100 -0.74020800                                                |                                                                                     |  |  |
| H                     | -0.91629400 -2.05310900 -0.35042300                                                |                                                                                     |  |  |
| C                     | -3.48270900 0.14645100 -0.57593800                                                 |                                                                                     |  |  |
| H                     | -3.49406700 2.13020000 0.25801400                                                  |                                                                                     |  |  |
| H                     | -3.16790900 -1.85674100 -1.28864000                                                |                                                                                     |  |  |
| H                     | -4.47943000 0.22594600 -0.99415200                                                 |                                                                                     |  |  |
| 25                    | 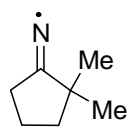 |  |  |  |
| Cartesian Coordinates |                                                                                    |                                                                                     |  |  |
| C                     | -1.72328300 -0.87266600 0.07643700                                                 |                                                                                     |  |  |
| C                     | -0.37984300 -1.32928800 -0.49235800                                                |                                                                                     |  |  |
| C                     | 0.64129300 -0.27125100 -0.03256500                                                 |                                                                                     |  |  |
| C                     | -0.22031100 1.01878000 0.00624300                                                  |                                                                                     |  |  |
| C                     | -1.69873600 0.64520400 -0.11511100                                                 |                                                                                     |  |  |
| H                     | -2.57570600 -1.34115400 -0.41980100                                                |                                                                                     |  |  |
| H                     | -1.79299200 -1.11979900 1.13986000                                                 |                                                                                     |  |  |
| H                     | -0.42755400 -1.33364100 -1.58728300                                                |                                                                                     |  |  |
| H                     | -0.09381200 -2.33520200 -0.17355000                                                |                                                                                     |  |  |
| H                     | -2.31379800 1.20761300 0.58791200                                                  |                                                                                     |  |  |
| H                     | -2.02413700 0.91376600 -1.12564900                                                 |                                                                                     |  |  |
| N                     | 0.23143100 2.16727200 0.12185600                                                   |                                                                                     |  |  |
| C                     | 1.12906900 -0.55813200 1.39199800                                                  |                                                                                     |  |  |
| H                     | 1.76586400 0.25439400 1.74759000                                                   |                                                                                     |  |  |
| H                     | 0.29980300 -0.66330300 2.09616700                                                  |                                                                                     |  |  |
| H                     | 1.70700800 -1.48734900 1.40850200                                                  |                                                                                     |  |  |
| C                     | 1.82655300 -0.12938700 -0.97939500                                                 |                                                                                     |  |  |
| H                     | 2.39484800 -1.06381200 -1.01911500                                                 |                                                                                     |  |  |
| H                     | 1.49571100 0.11167000 -1.99275100                                                  |                                                                                     |  |  |

| No.                   | Species                                                                             | Optimized Structure                                                                  |
|-----------------------|-------------------------------------------------------------------------------------|--------------------------------------------------------------------------------------|
| H                     | 2.49629700 0.66635200 -0.64637400                                                   |                                                                                      |
| 26                    | 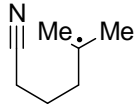   |    |
| Cartesian Coordinates |                                                                                     |                                                                                      |
| C                     | -1.56762300 -0.93315800 -0.00768000                                                 |                                                                                      |
| N                     | -1.36929500 -2.03612700 -0.28167500                                                 |                                                                                      |
| C                     | -1.86536700 0.45365800 0.32098900                                                   |                                                                                      |
| H                     | -2.88821900 0.65406200 -0.01281000                                                  |                                                                                      |
| H                     | -1.86451900 0.55381900 1.41181600                                                   |                                                                                      |
| C                     | -0.89944700 1.46750600 -0.30616100                                                  |                                                                                      |
| H                     | -0.85811300 1.30209900 -1.38685900                                                  |                                                                                      |
| H                     | -1.32472100 2.46519400 -0.15700700                                                  |                                                                                      |
| C                     | 0.51877900 1.42959400 0.28777700                                                    |                                                                                      |
| H                     | 0.45573000 1.64684300 1.36027500                                                    |                                                                                      |
| H                     | 1.07209500 2.26852800 -0.16279900                                                   |                                                                                      |
| C                     | 1.26328400 0.15547900 0.06933000                                                    |                                                                                      |
| C                     | 1.62420800 -0.26728500 -1.31190600                                                  |                                                                                      |
| H                     | 2.69230300 -0.51216300 -1.38788900                                                  |                                                                                      |
| H                     | 1.07928000 -1.17431600 -1.61005800                                                  |                                                                                      |
| H                     | 1.40853500 0.50660100 -2.05385800                                                   |                                                                                      |
| C                     | 1.66912700 -0.72703300 1.19557500                                                   |                                                                                      |
| H                     | 1.21272700 -1.72332300 1.10724500                                                   |                                                                                      |
| H                     | 2.75656900 -0.89106200 1.20843800                                                   |                                                                                      |
| H                     | 1.38562800 -0.31596800 2.16769500                                                   |                                                                                      |
| 27                    |  |  |
| Cartesian Coordinates |                                                                                     |                                                                                      |
| C                     | 0.95375500 1.26056500 -0.28550800                                                   |                                                                                      |
| C                     | -0.42806900 1.28278000 0.37427600                                                   |                                                                                      |
| C                     | -1.18168000 0.00000600 0.06928000                                                   |                                                                                      |
| C                     | -0.42807600 -1.28277000 0.37428900                                                  |                                                                                      |
| C                     | 0.95373700 -1.26057100 -0.28551700                                                  |                                                                                      |
| C                     | 1.73192100 -0.00001000 0.08239400                                                   |                                                                                      |
| H                     | -0.31417000 1.34986500 1.46368200                                                   |                                                                                      |
| H                     | -1.02041400 2.13887500 0.04812600                                                   |                                                                                      |
| H                     | 0.82991900 1.30801100 -1.37366400                                                   |                                                                                      |

| No.                   | Species                                                                             | Optimized Structure                                                                  |
|-----------------------|-------------------------------------------------------------------------------------|--------------------------------------------------------------------------------------|
| H                     | 1.51111300 2.15564800 0.00677300                                                    |                                                                                      |
| H                     | -0.31415700 -1.34983700 1.46369400                                                  |                                                                                      |
| H                     | -1.02043400 -2.13886600 0.04816400                                                  |                                                                                      |
| H                     | 1.51108700 -2.15566800 0.00674000                                                   |                                                                                      |
| H                     | 0.82988200 -1.30799800 -1.37367300                                                  |                                                                                      |
| H                     | 1.93649200 -0.00001700 1.16096400                                                   |                                                                                      |
| H                     | 2.70439100 -0.00001200 -0.41873000                                                  |                                                                                      |
| N                     | -2.32331900 0.00000100 -0.42962300                                                  |                                                                                      |
| 28                    | 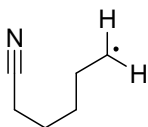   |    |
| Cartesian Coordinates |                                                                                     |                                                                                      |
| C                     | 1.47052900 0.72775100 -0.47829900                                                   |                                                                                      |
| C                     | 0.97850500 1.61810300 0.60327600                                                    |                                                                                      |
| C                     | -1.68124700 0.16146500 -0.00617700                                                  |                                                                                      |
| C                     | -0.99171500 -0.96130400 0.61246000                                                  |                                                                                      |
| C                     | 0.17747500 -1.51219200 -0.22343100                                                  |                                                                                      |
| C                     | 1.50357500 -0.76329100 -0.10287800                                                  |                                                                                      |
| H                     | 1.40971300 1.54670600 1.59637300                                                    |                                                                                      |
| H                     | 0.30532100 2.43933900 0.39954600                                                    |                                                                                      |
| H                     | 0.87690300 0.87092100 -1.38709400                                                   |                                                                                      |
| H                     | 2.49903900 1.02085000 -0.74566900                                                   |                                                                                      |
| H                     | -0.64892300 -0.65449700 1.60530900                                                  |                                                                                      |
| H                     | -1.73910600 -1.74714700 0.76254400                                                  |                                                                                      |
| H                     | 0.33998600 -2.54792000 0.08996800                                                   |                                                                                      |
| H                     | -0.13139200 -1.55423800 -1.27274900                                                 |                                                                                      |
| H                     | 1.88578800 -0.86247800 0.92074500                                                   |                                                                                      |
| H                     | 2.22551100 -1.27762100 -0.74578100                                                  |                                                                                      |
| N                     | -2.25222500 1.02041400 -0.52184300                                                  |                                                                                      |
| 29                    |  |  |
| Cartesian Coordinates |                                                                                     |                                                                                      |
| C                     | -0.43375700 -1.20357400 -0.87066700                                                 |                                                                                      |
| C                     | 0.90411100 -0.63615700 -0.36945800                                                  |                                                                                      |
| C                     | 0.75683400 0.86949500 -0.15048600                                                   |                                                                                      |
| C                     | -0.43145400 1.31747000 0.68235300                                                   |                                                                                      |
| C                     | -1.72575100 0.71141400 0.13400100                                                   |                                                                                      |



| No.                   | Species                                                                           | Optimized Structure                                                                |
|-----------------------|-----------------------------------------------------------------------------------|------------------------------------------------------------------------------------|
| C                     | -1.62066100 -0.80569600 0.00487100                                                |                                                                                    |
| H                     | 1.65960700 -0.76971000 -1.14816800                                                |                                                                                    |
| H                     | -0.60750600 -0.83882000 -1.88953500                                               |                                                                                    |
| H                     | -0.35442300 -2.29394100 -0.93765800                                               |                                                                                    |
| H                     | -0.27290900 0.98096100 1.71372300                                                 |                                                                                    |
| H                     | -0.46761100 2.40778900 0.69487300                                                 |                                                                                    |
| H                     | -2.56195200 0.98691900 0.78371500                                                 |                                                                                    |
| H                     | -1.93372300 1.14787400 -0.84997800                                                |                                                                                    |
| H                     | -1.52204300 -1.25242200 1.00131400                                                |                                                                                    |
| H                     | -2.54322500 -1.21083700 -0.42132500                                               |                                                                                    |
| N                     | 1.55151300 1.68191500 -0.66050000                                                 |                                                                                    |
| C                     | 1.40510900 -1.32223300 0.90323500                                                 |                                                                                    |
| H                     | 2.36110200 -0.89988600 1.22008100                                                 |                                                                                    |
| H                     | 0.70385700 -1.22561600 1.73560900                                                 |                                                                                    |
| H                     | 1.55165400 -2.39003200 0.71776800                                                 |                                                                                    |
| 30                    | 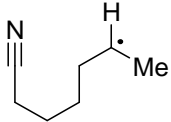 |  |
| Cartesian Coordinates |                                                                                   |                                                                                    |
| C                     | 1.03718000 -0.41304700 -1.00380600                                                |                                                                                    |
| C                     | 1.38077600 0.79467800 -0.19858200                                                 |                                                                                    |
| C                     | -1.74940400 0.91865400 0.07731400                                                 |                                                                                    |
| C                     | -1.53033000 -0.26716800 0.89166900                                                |                                                                                    |
| C                     | -1.06333900 -1.49638400 0.09031000                                                |                                                                                    |
| C                     | 0.43405700 -1.58173600 -0.19708200                                                |                                                                                    |
| H                     | 0.89020700 1.73378500 -0.42288900                                                 |                                                                                    |
| H                     | 0.35231600 -0.14390900 -1.81417400                                                |                                                                                    |
| H                     | 1.95156600 -0.79161500 -1.48668000                                                |                                                                                    |
| H                     | -0.80820400 -0.01979900 1.67594900                                                |                                                                                    |
| H                     | -2.47973100 -0.48888700 1.38959000                                                |                                                                                    |
| H                     | -1.35183500 -2.38361200 0.66220300                                                |                                                                                    |
| H                     | -1.62599500 -1.53959000 -0.84758000                                               |                                                                                    |
| H                     | 0.97841700 -1.68513800 0.74922200                                                 |                                                                                    |
| H                     | 0.60543100 -2.51448000 -0.74499300                                                |                                                                                    |
| N                     | -1.95697700 1.84403200 -0.57863600                                                |                                                                                    |
| C                     | 2.56940100 0.79939600 0.69173900                                                  |                                                                                    |
| H                     | 2.52810100 1.60607200 1.42773900                                                  |                                                                                    |
| H                     | 2.68692900 -0.14685100 1.23277900                                                 |                                                                                    |
| H                     | 3.50158800 0.93944400 0.11991100                                                  |                                                                                    |

| No.                                                                                                                                                                                                                                                                                                                                                                                                                                                                                                                                                                                                                                                                                                                                                                                                                                                                                                                                                                                                                                                                                                                                                                                                                                                                                                                                                                                                                                                                                                                                                                                                                                                                                                                                                                                                                                                                                                                                                                                                                                                                                                                                                                                                                                                                | Species                                                                             | Optimized Structure                                                                  |             |             |             |             |   |             |             |             |   |             |             |             |   |             |            |            |   |             |             |            |   |             |             |            |   |             |             |             |   |             |             |             |   |             |            |            |   |             |            |            |   |             |             |            |   |             |             |            |   |             |             |            |   |             |             |            |   |             |            |             |   |            |            |             |   |            |             |             |   |            |            |             |   |            |             |            |   |            |             |             |   |            |            |            |   |            |            |             |   |            |             |            |   |            |             |            |   |            |            |            |   |            |             |            |   |             |            |             |
|--------------------------------------------------------------------------------------------------------------------------------------------------------------------------------------------------------------------------------------------------------------------------------------------------------------------------------------------------------------------------------------------------------------------------------------------------------------------------------------------------------------------------------------------------------------------------------------------------------------------------------------------------------------------------------------------------------------------------------------------------------------------------------------------------------------------------------------------------------------------------------------------------------------------------------------------------------------------------------------------------------------------------------------------------------------------------------------------------------------------------------------------------------------------------------------------------------------------------------------------------------------------------------------------------------------------------------------------------------------------------------------------------------------------------------------------------------------------------------------------------------------------------------------------------------------------------------------------------------------------------------------------------------------------------------------------------------------------------------------------------------------------------------------------------------------------------------------------------------------------------------------------------------------------------------------------------------------------------------------------------------------------------------------------------------------------------------------------------------------------------------------------------------------------------------------------------------------------------------------------------------------------|-------------------------------------------------------------------------------------|--------------------------------------------------------------------------------------|-------------|-------------|-------------|-------------|---|-------------|-------------|-------------|---|-------------|-------------|-------------|---|-------------|------------|------------|---|-------------|-------------|------------|---|-------------|-------------|------------|---|-------------|-------------|-------------|---|-------------|-------------|-------------|---|-------------|------------|------------|---|-------------|------------|------------|---|-------------|-------------|------------|---|-------------|-------------|------------|---|-------------|-------------|------------|---|-------------|-------------|------------|---|-------------|------------|-------------|---|------------|------------|-------------|---|------------|-------------|-------------|---|------------|------------|-------------|---|------------|-------------|------------|---|------------|-------------|-------------|---|------------|------------|------------|---|------------|------------|-------------|---|------------|-------------|------------|---|------------|-------------|------------|---|------------|------------|------------|---|------------|-------------|------------|---|-------------|------------|-------------|
| 31                                                                                                                                                                                                                                                                                                                                                                                                                                                                                                                                                                                                                                                                                                                                                                                                                                                                                                                                                                                                                                                                                                                                                                                                                                                                                                                                                                                                                                                                                                                                                                                                                                                                                                                                                                                                                                                                                                                                                                                                                                                                                                                                                                                                                                                                 | 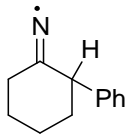   |    |             |             |             |             |   |             |             |             |   |             |             |             |   |             |            |            |   |             |             |            |   |             |             |            |   |             |             |             |   |             |             |             |   |             |            |            |   |             |            |            |   |             |             |            |   |             |             |            |   |             |             |            |   |             |             |            |   |             |            |             |   |            |            |             |   |            |             |             |   |            |            |             |   |            |             |            |   |            |             |             |   |            |            |            |   |            |            |             |   |            |             |            |   |            |             |            |   |            |            |            |   |            |             |            |   |             |            |             |
| <p>Cartesian Coordinates</p> <table border="0"> <tr><td>C</td><td>-1.43782300</td><td>-1.10937600</td><td>-1.12295600</td></tr> <tr><td>C</td><td>-0.62039000</td><td>0.18574000</td><td>-1.00400600</td></tr> <tr><td>C</td><td>-1.41899100</td><td>1.18267300</td><td>-0.15568000</td></tr> <tr><td>C</td><td>-1.90731000</td><td>0.67096100</td><td>1.18505000</td></tr> <tr><td>C</td><td>-2.70864000</td><td>-0.61893000</td><td>0.99758100</td></tr> <tr><td>C</td><td>-1.90512300</td><td>-1.66012300</td><td>0.22378300</td></tr> <tr><td>H</td><td>-2.31714600</td><td>-0.88855800</td><td>-1.73826400</td></tr> <tr><td>H</td><td>-0.86385100</td><td>-1.85870500</td><td>-1.67631200</td></tr> <tr><td>H</td><td>-1.02486800</td><td>0.47299300</td><td>1.80510700</td></tr> <tr><td>H</td><td>-2.49580500</td><td>1.44833200</td><td>1.67425300</td></tr> <tr><td>H</td><td>-3.00315100</td><td>-1.01072300</td><td>1.97568400</td></tr> <tr><td>H</td><td>-3.63425700</td><td>-0.39017500</td><td>0.45651900</td></tr> <tr><td>H</td><td>-1.04316000</td><td>-1.96844800</td><td>0.82549300</td></tr> <tr><td>H</td><td>-2.51055500</td><td>-2.55694000</td><td>0.06142400</td></tr> <tr><td>N</td><td>-1.66793900</td><td>2.33031900</td><td>-0.57058400</td></tr> <tr><td>C</td><td>0.78831100</td><td>0.03844700</td><td>-0.44215200</td></tr> <tr><td>C</td><td>1.41337700</td><td>-1.19836500</td><td>-0.28642000</td></tr> <tr><td>C</td><td>1.51505500</td><td>1.18928600</td><td>-0.12386800</td></tr> <tr><td>C</td><td>2.72264800</td><td>-1.28441100</td><td>0.17643000</td></tr> <tr><td>H</td><td>0.88573000</td><td>-2.11203400</td><td>-0.53248400</td></tr> <tr><td>C</td><td>2.82111900</td><td>1.10591700</td><td>0.33776700</td></tr> <tr><td>H</td><td>1.04532100</td><td>2.16028700</td><td>-0.24298100</td></tr> <tr><td>C</td><td>3.43150700</td><td>-0.13386700</td><td>0.49219400</td></tr> <tr><td>H</td><td>3.18721400</td><td>-2.25795400</td><td>0.28878900</td></tr> <tr><td>H</td><td>3.36447600</td><td>2.01356600</td><td>0.57648400</td></tr> <tr><td>H</td><td>4.45117900</td><td>-0.20106100</td><td>0.85431800</td></tr> <tr><td>H</td><td>-0.52798900</td><td>0.62948500</td><td>-2.00027800</td></tr> </table> |                                                                                     |                                                                                      | C           | -1.43782300 | -1.10937600 | -1.12295600 | C | -0.62039000 | 0.18574000  | -1.00400600 | C | -1.41899100 | 1.18267300  | -0.15568000 | C | -1.90731000 | 0.67096100 | 1.18505000 | C | -2.70864000 | -0.61893000 | 0.99758100 | C | -1.90512300 | -1.66012300 | 0.22378300 | H | -2.31714600 | -0.88855800 | -1.73826400 | H | -0.86385100 | -1.85870500 | -1.67631200 | H | -1.02486800 | 0.47299300 | 1.80510700 | H | -2.49580500 | 1.44833200 | 1.67425300 | H | -3.00315100 | -1.01072300 | 1.97568400 | H | -3.63425700 | -0.39017500 | 0.45651900 | H | -1.04316000 | -1.96844800 | 0.82549300 | H | -2.51055500 | -2.55694000 | 0.06142400 | N | -1.66793900 | 2.33031900 | -0.57058400 | C | 0.78831100 | 0.03844700 | -0.44215200 | C | 1.41337700 | -1.19836500 | -0.28642000 | C | 1.51505500 | 1.18928600 | -0.12386800 | C | 2.72264800 | -1.28441100 | 0.17643000 | H | 0.88573000 | -2.11203400 | -0.53248400 | C | 2.82111900 | 1.10591700 | 0.33776700 | H | 1.04532100 | 2.16028700 | -0.24298100 | C | 3.43150700 | -0.13386700 | 0.49219400 | H | 3.18721400 | -2.25795400 | 0.28878900 | H | 3.36447600 | 2.01356600 | 0.57648400 | H | 4.45117900 | -0.20106100 | 0.85431800 | H | -0.52798900 | 0.62948500 | -2.00027800 |
| C                                                                                                                                                                                                                                                                                                                                                                                                                                                                                                                                                                                                                                                                                                                                                                                                                                                                                                                                                                                                                                                                                                                                                                                                                                                                                                                                                                                                                                                                                                                                                                                                                                                                                                                                                                                                                                                                                                                                                                                                                                                                                                                                                                                                                                                                  | -1.43782300                                                                         | -1.10937600                                                                          | -1.12295600 |             |             |             |   |             |             |             |   |             |             |             |   |             |            |            |   |             |             |            |   |             |             |            |   |             |             |             |   |             |             |             |   |             |            |            |   |             |            |            |   |             |             |            |   |             |             |            |   |             |             |            |   |             |             |            |   |             |            |             |   |            |            |             |   |            |             |             |   |            |            |             |   |            |             |            |   |            |             |             |   |            |            |            |   |            |            |             |   |            |             |            |   |            |             |            |   |            |            |            |   |            |             |            |   |             |            |             |
| C                                                                                                                                                                                                                                                                                                                                                                                                                                                                                                                                                                                                                                                                                                                                                                                                                                                                                                                                                                                                                                                                                                                                                                                                                                                                                                                                                                                                                                                                                                                                                                                                                                                                                                                                                                                                                                                                                                                                                                                                                                                                                                                                                                                                                                                                  | -0.62039000                                                                         | 0.18574000                                                                           | -1.00400600 |             |             |             |   |             |             |             |   |             |             |             |   |             |            |            |   |             |             |            |   |             |             |            |   |             |             |             |   |             |             |             |   |             |            |            |   |             |            |            |   |             |             |            |   |             |             |            |   |             |             |            |   |             |             |            |   |             |            |             |   |            |            |             |   |            |             |             |   |            |            |             |   |            |             |            |   |            |             |             |   |            |            |            |   |            |            |             |   |            |             |            |   |            |             |            |   |            |            |            |   |            |             |            |   |             |            |             |
| C                                                                                                                                                                                                                                                                                                                                                                                                                                                                                                                                                                                                                                                                                                                                                                                                                                                                                                                                                                                                                                                                                                                                                                                                                                                                                                                                                                                                                                                                                                                                                                                                                                                                                                                                                                                                                                                                                                                                                                                                                                                                                                                                                                                                                                                                  | -1.41899100                                                                         | 1.18267300                                                                           | -0.15568000 |             |             |             |   |             |             |             |   |             |             |             |   |             |            |            |   |             |             |            |   |             |             |            |   |             |             |             |   |             |             |             |   |             |            |            |   |             |            |            |   |             |             |            |   |             |             |            |   |             |             |            |   |             |             |            |   |             |            |             |   |            |            |             |   |            |             |             |   |            |            |             |   |            |             |            |   |            |             |             |   |            |            |            |   |            |            |             |   |            |             |            |   |            |             |            |   |            |            |            |   |            |             |            |   |             |            |             |
| C                                                                                                                                                                                                                                                                                                                                                                                                                                                                                                                                                                                                                                                                                                                                                                                                                                                                                                                                                                                                                                                                                                                                                                                                                                                                                                                                                                                                                                                                                                                                                                                                                                                                                                                                                                                                                                                                                                                                                                                                                                                                                                                                                                                                                                                                  | -1.90731000                                                                         | 0.67096100                                                                           | 1.18505000  |             |             |             |   |             |             |             |   |             |             |             |   |             |            |            |   |             |             |            |   |             |             |            |   |             |             |             |   |             |             |             |   |             |            |            |   |             |            |            |   |             |             |            |   |             |             |            |   |             |             |            |   |             |             |            |   |             |            |             |   |            |            |             |   |            |             |             |   |            |            |             |   |            |             |            |   |            |             |             |   |            |            |            |   |            |            |             |   |            |             |            |   |            |             |            |   |            |            |            |   |            |             |            |   |             |            |             |
| C                                                                                                                                                                                                                                                                                                                                                                                                                                                                                                                                                                                                                                                                                                                                                                                                                                                                                                                                                                                                                                                                                                                                                                                                                                                                                                                                                                                                                                                                                                                                                                                                                                                                                                                                                                                                                                                                                                                                                                                                                                                                                                                                                                                                                                                                  | -2.70864000                                                                         | -0.61893000                                                                          | 0.99758100  |             |             |             |   |             |             |             |   |             |             |             |   |             |            |            |   |             |             |            |   |             |             |            |   |             |             |             |   |             |             |             |   |             |            |            |   |             |            |            |   |             |             |            |   |             |             |            |   |             |             |            |   |             |             |            |   |             |            |             |   |            |            |             |   |            |             |             |   |            |            |             |   |            |             |            |   |            |             |             |   |            |            |            |   |            |            |             |   |            |             |            |   |            |             |            |   |            |            |            |   |            |             |            |   |             |            |             |
| C                                                                                                                                                                                                                                                                                                                                                                                                                                                                                                                                                                                                                                                                                                                                                                                                                                                                                                                                                                                                                                                                                                                                                                                                                                                                                                                                                                                                                                                                                                                                                                                                                                                                                                                                                                                                                                                                                                                                                                                                                                                                                                                                                                                                                                                                  | -1.90512300                                                                         | -1.66012300                                                                          | 0.22378300  |             |             |             |   |             |             |             |   |             |             |             |   |             |            |            |   |             |             |            |   |             |             |            |   |             |             |             |   |             |             |             |   |             |            |            |   |             |            |            |   |             |             |            |   |             |             |            |   |             |             |            |   |             |             |            |   |             |            |             |   |            |            |             |   |            |             |             |   |            |            |             |   |            |             |            |   |            |             |             |   |            |            |            |   |            |            |             |   |            |             |            |   |            |             |            |   |            |            |            |   |            |             |            |   |             |            |             |
| H                                                                                                                                                                                                                                                                                                                                                                                                                                                                                                                                                                                                                                                                                                                                                                                                                                                                                                                                                                                                                                                                                                                                                                                                                                                                                                                                                                                                                                                                                                                                                                                                                                                                                                                                                                                                                                                                                                                                                                                                                                                                                                                                                                                                                                                                  | -2.31714600                                                                         | -0.88855800                                                                          | -1.73826400 |             |             |             |   |             |             |             |   |             |             |             |   |             |            |            |   |             |             |            |   |             |             |            |   |             |             |             |   |             |             |             |   |             |            |            |   |             |            |            |   |             |             |            |   |             |             |            |   |             |             |            |   |             |             |            |   |             |            |             |   |            |            |             |   |            |             |             |   |            |            |             |   |            |             |            |   |            |             |             |   |            |            |            |   |            |            |             |   |            |             |            |   |            |             |            |   |            |            |            |   |            |             |            |   |             |            |             |
| H                                                                                                                                                                                                                                                                                                                                                                                                                                                                                                                                                                                                                                                                                                                                                                                                                                                                                                                                                                                                                                                                                                                                                                                                                                                                                                                                                                                                                                                                                                                                                                                                                                                                                                                                                                                                                                                                                                                                                                                                                                                                                                                                                                                                                                                                  | -0.86385100                                                                         | -1.85870500                                                                          | -1.67631200 |             |             |             |   |             |             |             |   |             |             |             |   |             |            |            |   |             |             |            |   |             |             |            |   |             |             |             |   |             |             |             |   |             |            |            |   |             |            |            |   |             |             |            |   |             |             |            |   |             |             |            |   |             |             |            |   |             |            |             |   |            |            |             |   |            |             |             |   |            |            |             |   |            |             |            |   |            |             |             |   |            |            |            |   |            |            |             |   |            |             |            |   |            |             |            |   |            |            |            |   |            |             |            |   |             |            |             |
| H                                                                                                                                                                                                                                                                                                                                                                                                                                                                                                                                                                                                                                                                                                                                                                                                                                                                                                                                                                                                                                                                                                                                                                                                                                                                                                                                                                                                                                                                                                                                                                                                                                                                                                                                                                                                                                                                                                                                                                                                                                                                                                                                                                                                                                                                  | -1.02486800                                                                         | 0.47299300                                                                           | 1.80510700  |             |             |             |   |             |             |             |   |             |             |             |   |             |            |            |   |             |             |            |   |             |             |            |   |             |             |             |   |             |             |             |   |             |            |            |   |             |            |            |   |             |             |            |   |             |             |            |   |             |             |            |   |             |             |            |   |             |            |             |   |            |            |             |   |            |             |             |   |            |            |             |   |            |             |            |   |            |             |             |   |            |            |            |   |            |            |             |   |            |             |            |   |            |             |            |   |            |            |            |   |            |             |            |   |             |            |             |
| H                                                                                                                                                                                                                                                                                                                                                                                                                                                                                                                                                                                                                                                                                                                                                                                                                                                                                                                                                                                                                                                                                                                                                                                                                                                                                                                                                                                                                                                                                                                                                                                                                                                                                                                                                                                                                                                                                                                                                                                                                                                                                                                                                                                                                                                                  | -2.49580500                                                                         | 1.44833200                                                                           | 1.67425300  |             |             |             |   |             |             |             |   |             |             |             |   |             |            |            |   |             |             |            |   |             |             |            |   |             |             |             |   |             |             |             |   |             |            |            |   |             |            |            |   |             |             |            |   |             |             |            |   |             |             |            |   |             |             |            |   |             |            |             |   |            |            |             |   |            |             |             |   |            |            |             |   |            |             |            |   |            |             |             |   |            |            |            |   |            |            |             |   |            |             |            |   |            |             |            |   |            |            |            |   |            |             |            |   |             |            |             |
| H                                                                                                                                                                                                                                                                                                                                                                                                                                                                                                                                                                                                                                                                                                                                                                                                                                                                                                                                                                                                                                                                                                                                                                                                                                                                                                                                                                                                                                                                                                                                                                                                                                                                                                                                                                                                                                                                                                                                                                                                                                                                                                                                                                                                                                                                  | -3.00315100                                                                         | -1.01072300                                                                          | 1.97568400  |             |             |             |   |             |             |             |   |             |             |             |   |             |            |            |   |             |             |            |   |             |             |            |   |             |             |             |   |             |             |             |   |             |            |            |   |             |            |            |   |             |             |            |   |             |             |            |   |             |             |            |   |             |             |            |   |             |            |             |   |            |            |             |   |            |             |             |   |            |            |             |   |            |             |            |   |            |             |             |   |            |            |            |   |            |            |             |   |            |             |            |   |            |             |            |   |            |            |            |   |            |             |            |   |             |            |             |
| H                                                                                                                                                                                                                                                                                                                                                                                                                                                                                                                                                                                                                                                                                                                                                                                                                                                                                                                                                                                                                                                                                                                                                                                                                                                                                                                                                                                                                                                                                                                                                                                                                                                                                                                                                                                                                                                                                                                                                                                                                                                                                                                                                                                                                                                                  | -3.63425700                                                                         | -0.39017500                                                                          | 0.45651900  |             |             |             |   |             |             |             |   |             |             |             |   |             |            |            |   |             |             |            |   |             |             |            |   |             |             |             |   |             |             |             |   |             |            |            |   |             |            |            |   |             |             |            |   |             |             |            |   |             |             |            |   |             |             |            |   |             |            |             |   |            |            |             |   |            |             |             |   |            |            |             |   |            |             |            |   |            |             |             |   |            |            |            |   |            |            |             |   |            |             |            |   |            |             |            |   |            |            |            |   |            |             |            |   |             |            |             |
| H                                                                                                                                                                                                                                                                                                                                                                                                                                                                                                                                                                                                                                                                                                                                                                                                                                                                                                                                                                                                                                                                                                                                                                                                                                                                                                                                                                                                                                                                                                                                                                                                                                                                                                                                                                                                                                                                                                                                                                                                                                                                                                                                                                                                                                                                  | -1.04316000                                                                         | -1.96844800                                                                          | 0.82549300  |             |             |             |   |             |             |             |   |             |             |             |   |             |            |            |   |             |             |            |   |             |             |            |   |             |             |             |   |             |             |             |   |             |            |            |   |             |            |            |   |             |             |            |   |             |             |            |   |             |             |            |   |             |             |            |   |             |            |             |   |            |            |             |   |            |             |             |   |            |            |             |   |            |             |            |   |            |             |             |   |            |            |            |   |            |            |             |   |            |             |            |   |            |             |            |   |            |            |            |   |            |             |            |   |             |            |             |
| H                                                                                                                                                                                                                                                                                                                                                                                                                                                                                                                                                                                                                                                                                                                                                                                                                                                                                                                                                                                                                                                                                                                                                                                                                                                                                                                                                                                                                                                                                                                                                                                                                                                                                                                                                                                                                                                                                                                                                                                                                                                                                                                                                                                                                                                                  | -2.51055500                                                                         | -2.55694000                                                                          | 0.06142400  |             |             |             |   |             |             |             |   |             |             |             |   |             |            |            |   |             |             |            |   |             |             |            |   |             |             |             |   |             |             |             |   |             |            |            |   |             |            |            |   |             |             |            |   |             |             |            |   |             |             |            |   |             |             |            |   |             |            |             |   |            |            |             |   |            |             |             |   |            |            |             |   |            |             |            |   |            |             |             |   |            |            |            |   |            |            |             |   |            |             |            |   |            |             |            |   |            |            |            |   |            |             |            |   |             |            |             |
| N                                                                                                                                                                                                                                                                                                                                                                                                                                                                                                                                                                                                                                                                                                                                                                                                                                                                                                                                                                                                                                                                                                                                                                                                                                                                                                                                                                                                                                                                                                                                                                                                                                                                                                                                                                                                                                                                                                                                                                                                                                                                                                                                                                                                                                                                  | -1.66793900                                                                         | 2.33031900                                                                           | -0.57058400 |             |             |             |   |             |             |             |   |             |             |             |   |             |            |            |   |             |             |            |   |             |             |            |   |             |             |             |   |             |             |             |   |             |            |            |   |             |            |            |   |             |             |            |   |             |             |            |   |             |             |            |   |             |             |            |   |             |            |             |   |            |            |             |   |            |             |             |   |            |            |             |   |            |             |            |   |            |             |             |   |            |            |            |   |            |            |             |   |            |             |            |   |            |             |            |   |            |            |            |   |            |             |            |   |             |            |             |
| C                                                                                                                                                                                                                                                                                                                                                                                                                                                                                                                                                                                                                                                                                                                                                                                                                                                                                                                                                                                                                                                                                                                                                                                                                                                                                                                                                                                                                                                                                                                                                                                                                                                                                                                                                                                                                                                                                                                                                                                                                                                                                                                                                                                                                                                                  | 0.78831100                                                                          | 0.03844700                                                                           | -0.44215200 |             |             |             |   |             |             |             |   |             |             |             |   |             |            |            |   |             |             |            |   |             |             |            |   |             |             |             |   |             |             |             |   |             |            |            |   |             |            |            |   |             |             |            |   |             |             |            |   |             |             |            |   |             |             |            |   |             |            |             |   |            |            |             |   |            |             |             |   |            |            |             |   |            |             |            |   |            |             |             |   |            |            |            |   |            |            |             |   |            |             |            |   |            |             |            |   |            |            |            |   |            |             |            |   |             |            |             |
| C                                                                                                                                                                                                                                                                                                                                                                                                                                                                                                                                                                                                                                                                                                                                                                                                                                                                                                                                                                                                                                                                                                                                                                                                                                                                                                                                                                                                                                                                                                                                                                                                                                                                                                                                                                                                                                                                                                                                                                                                                                                                                                                                                                                                                                                                  | 1.41337700                                                                          | -1.19836500                                                                          | -0.28642000 |             |             |             |   |             |             |             |   |             |             |             |   |             |            |            |   |             |             |            |   |             |             |            |   |             |             |             |   |             |             |             |   |             |            |            |   |             |            |            |   |             |             |            |   |             |             |            |   |             |             |            |   |             |             |            |   |             |            |             |   |            |            |             |   |            |             |             |   |            |            |             |   |            |             |            |   |            |             |             |   |            |            |            |   |            |            |             |   |            |             |            |   |            |             |            |   |            |            |            |   |            |             |            |   |             |            |             |
| C                                                                                                                                                                                                                                                                                                                                                                                                                                                                                                                                                                                                                                                                                                                                                                                                                                                                                                                                                                                                                                                                                                                                                                                                                                                                                                                                                                                                                                                                                                                                                                                                                                                                                                                                                                                                                                                                                                                                                                                                                                                                                                                                                                                                                                                                  | 1.51505500                                                                          | 1.18928600                                                                           | -0.12386800 |             |             |             |   |             |             |             |   |             |             |             |   |             |            |            |   |             |             |            |   |             |             |            |   |             |             |             |   |             |             |             |   |             |            |            |   |             |            |            |   |             |             |            |   |             |             |            |   |             |             |            |   |             |             |            |   |             |            |             |   |            |            |             |   |            |             |             |   |            |            |             |   |            |             |            |   |            |             |             |   |            |            |            |   |            |            |             |   |            |             |            |   |            |             |            |   |            |            |            |   |            |             |            |   |             |            |             |
| C                                                                                                                                                                                                                                                                                                                                                                                                                                                                                                                                                                                                                                                                                                                                                                                                                                                                                                                                                                                                                                                                                                                                                                                                                                                                                                                                                                                                                                                                                                                                                                                                                                                                                                                                                                                                                                                                                                                                                                                                                                                                                                                                                                                                                                                                  | 2.72264800                                                                          | -1.28441100                                                                          | 0.17643000  |             |             |             |   |             |             |             |   |             |             |             |   |             |            |            |   |             |             |            |   |             |             |            |   |             |             |             |   |             |             |             |   |             |            |            |   |             |            |            |   |             |             |            |   |             |             |            |   |             |             |            |   |             |             |            |   |             |            |             |   |            |            |             |   |            |             |             |   |            |            |             |   |            |             |            |   |            |             |             |   |            |            |            |   |            |            |             |   |            |             |            |   |            |             |            |   |            |            |            |   |            |             |            |   |             |            |             |
| H                                                                                                                                                                                                                                                                                                                                                                                                                                                                                                                                                                                                                                                                                                                                                                                                                                                                                                                                                                                                                                                                                                                                                                                                                                                                                                                                                                                                                                                                                                                                                                                                                                                                                                                                                                                                                                                                                                                                                                                                                                                                                                                                                                                                                                                                  | 0.88573000                                                                          | -2.11203400                                                                          | -0.53248400 |             |             |             |   |             |             |             |   |             |             |             |   |             |            |            |   |             |             |            |   |             |             |            |   |             |             |             |   |             |             |             |   |             |            |            |   |             |            |            |   |             |             |            |   |             |             |            |   |             |             |            |   |             |             |            |   |             |            |             |   |            |            |             |   |            |             |             |   |            |            |             |   |            |             |            |   |            |             |             |   |            |            |            |   |            |            |             |   |            |             |            |   |            |             |            |   |            |            |            |   |            |             |            |   |             |            |             |
| C                                                                                                                                                                                                                                                                                                                                                                                                                                                                                                                                                                                                                                                                                                                                                                                                                                                                                                                                                                                                                                                                                                                                                                                                                                                                                                                                                                                                                                                                                                                                                                                                                                                                                                                                                                                                                                                                                                                                                                                                                                                                                                                                                                                                                                                                  | 2.82111900                                                                          | 1.10591700                                                                           | 0.33776700  |             |             |             |   |             |             |             |   |             |             |             |   |             |            |            |   |             |             |            |   |             |             |            |   |             |             |             |   |             |             |             |   |             |            |            |   |             |            |            |   |             |             |            |   |             |             |            |   |             |             |            |   |             |             |            |   |             |            |             |   |            |            |             |   |            |             |             |   |            |            |             |   |            |             |            |   |            |             |             |   |            |            |            |   |            |            |             |   |            |             |            |   |            |             |            |   |            |            |            |   |            |             |            |   |             |            |             |
| H                                                                                                                                                                                                                                                                                                                                                                                                                                                                                                                                                                                                                                                                                                                                                                                                                                                                                                                                                                                                                                                                                                                                                                                                                                                                                                                                                                                                                                                                                                                                                                                                                                                                                                                                                                                                                                                                                                                                                                                                                                                                                                                                                                                                                                                                  | 1.04532100                                                                          | 2.16028700                                                                           | -0.24298100 |             |             |             |   |             |             |             |   |             |             |             |   |             |            |            |   |             |             |            |   |             |             |            |   |             |             |             |   |             |             |             |   |             |            |            |   |             |            |            |   |             |             |            |   |             |             |            |   |             |             |            |   |             |             |            |   |             |            |             |   |            |            |             |   |            |             |             |   |            |            |             |   |            |             |            |   |            |             |             |   |            |            |            |   |            |            |             |   |            |             |            |   |            |             |            |   |            |            |            |   |            |             |            |   |             |            |             |
| C                                                                                                                                                                                                                                                                                                                                                                                                                                                                                                                                                                                                                                                                                                                                                                                                                                                                                                                                                                                                                                                                                                                                                                                                                                                                                                                                                                                                                                                                                                                                                                                                                                                                                                                                                                                                                                                                                                                                                                                                                                                                                                                                                                                                                                                                  | 3.43150700                                                                          | -0.13386700                                                                          | 0.49219400  |             |             |             |   |             |             |             |   |             |             |             |   |             |            |            |   |             |             |            |   |             |             |            |   |             |             |             |   |             |             |             |   |             |            |            |   |             |            |            |   |             |             |            |   |             |             |            |   |             |             |            |   |             |             |            |   |             |            |             |   |            |            |             |   |            |             |             |   |            |            |             |   |            |             |            |   |            |             |             |   |            |            |            |   |            |            |             |   |            |             |            |   |            |             |            |   |            |            |            |   |            |             |            |   |             |            |             |
| H                                                                                                                                                                                                                                                                                                                                                                                                                                                                                                                                                                                                                                                                                                                                                                                                                                                                                                                                                                                                                                                                                                                                                                                                                                                                                                                                                                                                                                                                                                                                                                                                                                                                                                                                                                                                                                                                                                                                                                                                                                                                                                                                                                                                                                                                  | 3.18721400                                                                          | -2.25795400                                                                          | 0.28878900  |             |             |             |   |             |             |             |   |             |             |             |   |             |            |            |   |             |             |            |   |             |             |            |   |             |             |             |   |             |             |             |   |             |            |            |   |             |            |            |   |             |             |            |   |             |             |            |   |             |             |            |   |             |             |            |   |             |            |             |   |            |            |             |   |            |             |             |   |            |            |             |   |            |             |            |   |            |             |             |   |            |            |            |   |            |            |             |   |            |             |            |   |            |             |            |   |            |            |            |   |            |             |            |   |             |            |             |
| H                                                                                                                                                                                                                                                                                                                                                                                                                                                                                                                                                                                                                                                                                                                                                                                                                                                                                                                                                                                                                                                                                                                                                                                                                                                                                                                                                                                                                                                                                                                                                                                                                                                                                                                                                                                                                                                                                                                                                                                                                                                                                                                                                                                                                                                                  | 3.36447600                                                                          | 2.01356600                                                                           | 0.57648400  |             |             |             |   |             |             |             |   |             |             |             |   |             |            |            |   |             |             |            |   |             |             |            |   |             |             |             |   |             |             |             |   |             |            |            |   |             |            |            |   |             |             |            |   |             |             |            |   |             |             |            |   |             |             |            |   |             |            |             |   |            |            |             |   |            |             |             |   |            |            |             |   |            |             |            |   |            |             |             |   |            |            |            |   |            |            |             |   |            |             |            |   |            |             |            |   |            |            |            |   |            |             |            |   |             |            |             |
| H                                                                                                                                                                                                                                                                                                                                                                                                                                                                                                                                                                                                                                                                                                                                                                                                                                                                                                                                                                                                                                                                                                                                                                                                                                                                                                                                                                                                                                                                                                                                                                                                                                                                                                                                                                                                                                                                                                                                                                                                                                                                                                                                                                                                                                                                  | 4.45117900                                                                          | -0.20106100                                                                          | 0.85431800  |             |             |             |   |             |             |             |   |             |             |             |   |             |            |            |   |             |             |            |   |             |             |            |   |             |             |             |   |             |             |             |   |             |            |            |   |             |            |            |   |             |             |            |   |             |             |            |   |             |             |            |   |             |             |            |   |             |            |             |   |            |            |             |   |            |             |             |   |            |            |             |   |            |             |            |   |            |             |             |   |            |            |            |   |            |            |             |   |            |             |            |   |            |             |            |   |            |            |            |   |            |             |            |   |             |            |             |
| H                                                                                                                                                                                                                                                                                                                                                                                                                                                                                                                                                                                                                                                                                                                                                                                                                                                                                                                                                                                                                                                                                                                                                                                                                                                                                                                                                                                                                                                                                                                                                                                                                                                                                                                                                                                                                                                                                                                                                                                                                                                                                                                                                                                                                                                                  | -0.52798900                                                                         | 0.62948500                                                                           | -2.00027800 |             |             |             |   |             |             |             |   |             |             |             |   |             |            |            |   |             |             |            |   |             |             |            |   |             |             |             |   |             |             |             |   |             |            |            |   |             |            |            |   |             |             |            |   |             |             |            |   |             |             |            |   |             |             |            |   |             |            |             |   |            |            |             |   |            |             |             |   |            |            |             |   |            |             |            |   |            |             |             |   |            |            |            |   |            |            |             |   |            |             |            |   |            |             |            |   |            |            |            |   |            |             |            |   |             |            |             |
| 32                                                                                                                                                                                                                                                                                                                                                                                                                                                                                                                                                                                                                                                                                                                                                                                                                                                                                                                                                                                                                                                                                                                                                                                                                                                                                                                                                                                                                                                                                                                                                                                                                                                                                                                                                                                                                                                                                                                                                                                                                                                                                                                                                                                                                                                                 |  |  |             |             |             |             |   |             |             |             |   |             |             |             |   |             |            |            |   |             |             |            |   |             |             |            |   |             |             |             |   |             |             |             |   |             |            |            |   |             |            |            |   |             |             |            |   |             |             |            |   |             |             |            |   |             |             |            |   |             |            |             |   |            |            |             |   |            |             |             |   |            |            |             |   |            |             |            |   |            |             |             |   |            |            |            |   |            |            |             |   |            |             |            |   |            |             |            |   |            |            |            |   |            |             |            |   |             |            |             |
| <p>Cartesian Coordinates</p> <table border="0"> <tr><td>C</td><td>0.97959100</td><td>1.05413700</td><td>-1.22076200</td></tr> <tr><td>C</td><td>0.15752500</td><td>-0.15926300</td><td>-0.94610400</td></tr> <tr><td>C</td><td>2.86524000</td><td>-1.32828900</td><td>0.23210600</td></tr> </table>                                                                                                                                                                                                                                                                                                                                                                                                                                                                                                                                                                                                                                                                                                                                                                                                                                                                                                                                                                                                                                                                                                                                                                                                                                                                                                                                                                                                                                                                                                                                                                                                                                                                                                                                                                                                                                                                                                                                                                |                                                                                     |                                                                                      | C           | 0.97959100  | 1.05413700  | -1.22076200 | C | 0.15752500  | -0.15926300 | -0.94610400 | C | 2.86524000  | -1.32828900 | 0.23210600  |   |             |            |            |   |             |             |            |   |             |             |            |   |             |             |             |   |             |             |             |   |             |            |            |   |             |            |            |   |             |             |            |   |             |             |            |   |             |             |            |   |             |             |            |   |             |            |             |   |            |            |             |   |            |             |             |   |            |            |             |   |            |             |            |   |            |             |             |   |            |            |            |   |            |            |             |   |            |             |            |   |            |             |            |   |            |            |            |   |            |             |            |   |             |            |             |
| C                                                                                                                                                                                                                                                                                                                                                                                                                                                                                                                                                                                                                                                                                                                                                                                                                                                                                                                                                                                                                                                                                                                                                                                                                                                                                                                                                                                                                                                                                                                                                                                                                                                                                                                                                                                                                                                                                                                                                                                                                                                                                                                                                                                                                                                                  | 0.97959100                                                                          | 1.05413700                                                                           | -1.22076200 |             |             |             |   |             |             |             |   |             |             |             |   |             |            |            |   |             |             |            |   |             |             |            |   |             |             |             |   |             |             |             |   |             |            |            |   |             |            |            |   |             |             |            |   |             |             |            |   |             |             |            |   |             |             |            |   |             |            |             |   |            |            |             |   |            |             |             |   |            |            |             |   |            |             |            |   |            |             |             |   |            |            |            |   |            |            |             |   |            |             |            |   |            |             |            |   |            |            |            |   |            |             |            |   |             |            |             |
| C                                                                                                                                                                                                                                                                                                                                                                                                                                                                                                                                                                                                                                                                                                                                                                                                                                                                                                                                                                                                                                                                                                                                                                                                                                                                                                                                                                                                                                                                                                                                                                                                                                                                                                                                                                                                                                                                                                                                                                                                                                                                                                                                                                                                                                                                  | 0.15752500                                                                          | -0.15926300                                                                          | -0.94610400 |             |             |             |   |             |             |             |   |             |             |             |   |             |            |            |   |             |             |            |   |             |             |            |   |             |             |             |   |             |             |             |   |             |            |            |   |             |            |            |   |             |             |            |   |             |             |            |   |             |             |            |   |             |             |            |   |             |            |             |   |            |            |             |   |            |             |             |   |            |            |             |   |            |             |            |   |            |             |             |   |            |            |            |   |            |            |             |   |            |             |            |   |            |             |            |   |            |            |            |   |            |             |            |   |             |            |             |
| C                                                                                                                                                                                                                                                                                                                                                                                                                                                                                                                                                                                                                                                                                                                                                                                                                                                                                                                                                                                                                                                                                                                                                                                                                                                                                                                                                                                                                                                                                                                                                                                                                                                                                                                                                                                                                                                                                                                                                                                                                                                                                                                                                                                                                                                                  | 2.86524000                                                                          | -1.32828900                                                                          | 0.23210600  |             |             |             |   |             |             |             |   |             |             |             |   |             |            |            |   |             |             |            |   |             |             |            |   |             |             |             |   |             |             |             |   |             |            |            |   |             |            |            |   |             |             |            |   |             |             |            |   |             |             |            |   |             |             |            |   |             |            |             |   |            |            |             |   |            |             |             |   |            |            |             |   |            |             |            |   |            |             |             |   |            |            |            |   |            |            |             |   |            |             |            |   |            |             |            |   |            |            |            |   |            |             |            |   |             |            |             |

| No.                   | Species                                                                             | Optimized Structure                                                                  |  |  |
|-----------------------|-------------------------------------------------------------------------------------|--------------------------------------------------------------------------------------|--|--|
| C                     | 2.67033200 -0.27449400 1.21556200                                                   |                                                                                      |  |  |
| C                     | 2.81288500 1.14875300 0.64322400                                                    |                                                                                      |  |  |
| C                     | 1.55582800 1.75881900 0.02828200                                                    |                                                                                      |  |  |
| H                     | 1.80153700 0.79268900 -1.89458700                                                   |                                                                                      |  |  |
| H                     | 0.36840000 1.79145700 -1.75710900                                                   |                                                                                      |  |  |
| H                     | 1.68768600 -0.40888300 1.67890700                                                   |                                                                                      |  |  |
| H                     | 3.41557400 -0.43426800 2.00113300                                                   |                                                                                      |  |  |
| H                     | 3.12832800 1.79534100 1.46758500                                                    |                                                                                      |  |  |
| H                     | 3.63075200 1.15926800 -0.08405700                                                   |                                                                                      |  |  |
| H                     | 0.77484900 1.82394600 0.79393800                                                    |                                                                                      |  |  |
| H                     | 1.80233200 2.79037700 -0.24608900                                                   |                                                                                      |  |  |
| N                     | 3.04862000 -2.15741800 -0.54818000                                                  |                                                                                      |  |  |
| H                     | 0.59324600 -1.13104500 -1.14894400                                                  |                                                                                      |  |  |
| C                     | -1.16640400 -0.13424600 -0.44403200                                                 |                                                                                      |  |  |
| C                     | -1.87243500 1.06599600 -0.18400600                                                  |                                                                                      |  |  |
| C                     | -1.84377400 -1.35192300 -0.18422600                                                 |                                                                                      |  |  |
| C                     | -3.16556900 1.04121300 0.30601600                                                   |                                                                                      |  |  |
| H                     | -1.39750900 2.02041500 -0.38070700                                                  |                                                                                      |  |  |
| C                     | -3.13410300 -1.36601200 0.30631100                                                  |                                                                                      |  |  |
| H                     | -1.32597400 -2.28534300 -0.38006300                                                 |                                                                                      |  |  |
| C                     | -3.80692500 -0.16987700 0.55738600                                                  |                                                                                      |  |  |
| H                     | -3.68505400 1.97498000 0.49307900                                                   |                                                                                      |  |  |
| H                     | -3.62707600 -2.31356400 0.49476900                                                  |                                                                                      |  |  |
| H                     | -4.82056900 -0.18233800 0.94085200                                                  |                                                                                      |  |  |
| 33                    | 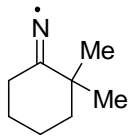 |  |  |  |
| Cartesian Coordinates |                                                                                     |                                                                                      |  |  |
| C                     | -0.10581500 -1.28601800 -0.67538900                                                 |                                                                                      |  |  |
| C                     | 0.84408200 -0.29513000 0.02858500                                                   |                                                                                      |  |  |
| C                     | 0.17470300 1.08987000 0.01360100                                                    |                                                                                      |  |  |
| C                     | -1.26766300 1.16167500 0.49107600                                                   |                                                                                      |  |  |
| C                     | -2.13258300 0.14426500 -0.25402800                                                  |                                                                                      |  |  |
| C                     | -1.54243700 -1.25858100 -0.15987000                                                 |                                                                                      |  |  |
| H                     | -0.10996100 -1.05068000 -1.74683000                                                 |                                                                                      |  |  |
| H                     | 0.31712900 -2.29276000 -0.58013300                                                  |                                                                                      |  |  |
| H                     | -1.28709500 0.95128400 1.56673000                                                   |                                                                                      |  |  |
| H                     | -1.63262700 2.18042200 0.35185400                                                   |                                                                                      |  |  |
| H                     | -3.15030900 0.16460900 0.14757100                                                   |                                                                                      |  |  |
| H                     | -2.20274200 0.44073700 -1.30721700                                                  |                                                                                      |  |  |
| H                     | -1.58003000 -1.60545400 0.87944000                                                  |                                                                                      |  |  |

| No.                   | Species                                                                           | Optimized Structure                                                                |
|-----------------------|-----------------------------------------------------------------------------------|------------------------------------------------------------------------------------|
| H                     | -2.14997700 -1.96168700 -0.73762400                                               |                                                                                    |
| N                     | 0.76046900 2.11012100 -0.39612500                                                 |                                                                                    |
| C                     | 1.08815500 -0.70701600 1.48645400                                                 |                                                                                    |
| H                     | 1.74796400 0.00927000 1.98228500                                                  |                                                                                    |
| H                     | 0.16767300 -0.77589300 2.06925900                                                 |                                                                                    |
| H                     | 1.57287700 -1.68776600 1.51270600                                                 |                                                                                    |
| C                     | 2.17966700 -0.25139500 -0.70982400                                                |                                                                                    |
| H                     | 2.87091900 0.44592400 -0.23194300                                                 |                                                                                    |
| H                     | 2.63730200 -1.24516100 -0.711175100                                               |                                                                                    |
| H                     | 2.04693800 0.07028600 -1.74510200                                                 |                                                                                    |
| 34                    | 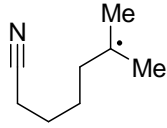 |  |
| Cartesian Coordinates |                                                                                   |                                                                                    |
| C                     | -0.68639600 0.85829200 -0.97876000                                                |                                                                                    |
| C                     | -1.37926300 -0.03026900 0.00926000                                                |                                                                                    |
| C                     | 1.46405900 -1.32161100 0.22859400                                                 |                                                                                    |
| C                     | 1.80289200 -0.03416300 0.81582900                                                 |                                                                                    |
| C                     | 1.77780100 1.13072000 -0.19091900                                                 |                                                                                    |
| C                     | 0.41574200 1.77736300 -0.43527500                                                 |                                                                                    |
| H                     | -0.27741500 0.24521100 -1.79032300                                                |                                                                                    |
| H                     | -1.44555500 1.50403000 -1.45778000                                                |                                                                                    |
| H                     | 1.12493400 0.15920400 1.65236200                                                  |                                                                                    |
| H                     | 2.80812300 -0.13589600 1.23786100                                                 |                                                                                    |
| H                     | 2.45726200 1.90081500 0.18667100                                                  |                                                                                    |
| H                     | 2.20289500 0.78509600 -1.13854000                                                 |                                                                                    |
| H                     | 0.07505000 2.25817200 0.48847100                                                  |                                                                                    |
| H                     | 0.57046900 2.59283600 -1.14944500                                                 |                                                                                    |
| N                     | 1.25638500 -2.34737800 -0.25601900                                                |                                                                                    |
| C                     | -2.00684600 0.57206000 1.22048000                                                 |                                                                                    |
| H                     | -2.19212200 -0.18371000 1.98960300                                                |                                                                                    |
| H                     | -1.40499200 1.36770000 1.66812400                                                 |                                                                                    |
| H                     | -2.98709600 1.02084500 0.98231200                                                 |                                                                                    |
| C                     | -1.95191600 -1.30808700 -0.49710800                                               |                                                                                    |
| H                     | -2.25765200 -1.96665700 0.32064300                                                |                                                                                    |
| H                     | -2.84961900 -1.12865800 -1.11380300                                               |                                                                                    |
| H                     | -1.23541700 -1.85317400 -1.11662100                                               |                                                                                    |

| No.                   | Species                                                                             | Optimized Structure                                                                  |
|-----------------------|-------------------------------------------------------------------------------------|--------------------------------------------------------------------------------------|
| 35                    | 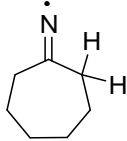   |    |
| Cartesian Coordinates |                                                                                     |                                                                                      |
| C                     | 0.58476800 -1.52277600 -0.39983700                                                  |                                                                                      |
| C                     | 1.79341800 -0.75145300 0.12999500                                                   |                                                                                      |
| C                     | 1.79311600 0.75190800 -0.12999900                                                   |                                                                                      |
| C                     | -0.71328400 -1.26774200 0.37101600                                                  |                                                                                      |
| C                     | 0.58421500 1.52273200 0.39999000                                                    |                                                                                      |
| C                     | -1.46694000 -0.00030400 -0.00058900                                                 |                                                                                      |
| C                     | -0.71371400 1.26771600 -0.37109600                                                  |                                                                                      |
| H                     | 0.43920800 -1.31826500 -1.46728300                                                  |                                                                                      |
| H                     | 1.87064700 -0.93047100 1.21060100                                                   |                                                                                      |
| H                     | 1.87022900 0.93102400 -1.21059900                                                   |                                                                                      |
| H                     | 0.43862200 1.31776800 1.46734400                                                    |                                                                                      |
| H                     | -0.48660800 -1.21083600 1.44326000                                                  |                                                                                      |
| H                     | 0.80376300 -2.59286000 -0.32853900                                                  |                                                                                      |
| H                     | 2.70246700 -1.17547800 -0.31046900                                                  |                                                                                      |
| H                     | 2.70202400 1.17624600 0.31045500                                                    |                                                                                      |
| H                     | -1.40804600 -2.10117600 0.24860100                                                  |                                                                                      |
| H                     | 0.80296500 2.59289700 0.32913900                                                    |                                                                                      |
| H                     | -1.40878200 2.10081800 -0.24813400                                                  |                                                                                      |
| H                     | -0.48698600 1.21163900 -1.44336400                                                  |                                                                                      |
| N                     | -2.71556700 -0.00025700 0.00030100                                                  |                                                                                      |
| 36                    |  |  |
| Cartesian Coordinates |                                                                                     |                                                                                      |
| C                     | 0.49593500 1.08481100 -0.33228800                                                   |                                                                                      |
| C                     | -0.90396100 1.48656400 0.14277000                                                   |                                                                                      |
| C                     | -2.08393700 0.61406100 -0.29649200                                                  |                                                                                      |
| C                     | 1.18067000 0.03669700 0.55506300                                                    |                                                                                      |
| C                     | -2.20074600 -0.78383300 0.32340000                                                  |                                                                                      |
| C                     | 2.52907000 -0.27221100 0.10919000                                                   |                                                                                      |
| C                     | -1.34458400 -1.83257600 -0.28388200                                                 |                                                                                      |
| H                     | 0.45256700 0.71329000 -1.36117600                                                   |                                                                                      |
| H                     | -0.90573400 1.57658200 1.23703000                                                   |                                                                                      |
| H                     | -2.07580400 0.51942000 -1.38967500                                                  |                                                                                      |

| No.                   | Species                                                                           | Optimized Structure                                                                |  |  |
|-----------------------|-----------------------------------------------------------------------------------|------------------------------------------------------------------------------------|--|--|
| H                     | -2.02756700 -0.72886100 1.40671300                                                |                                                                                    |  |  |
| H                     | 0.60076100 -0.89453000 0.56057700                                                 |                                                                                    |  |  |
| H                     | 1.13323100 1.97342400 -0.35567400                                                 |                                                                                    |  |  |
| H                     | -1.09851300 2.49628400 -0.23300000                                                |                                                                                    |  |  |
| H                     | -2.99802400 1.16583700 -0.05350700                                                |                                                                                    |  |  |
| H                     | 1.23411500 0.39347800 1.58910500                                                  |                                                                                    |  |  |
| H                     | -3.25386400 -1.10189300 0.23178500                                                |                                                                                    |  |  |
| H                     | -1.17481500 -2.77151500 0.23007400                                                |                                                                                    |  |  |
| H                     | -1.08678500 -1.78842100 -1.33632100                                               |                                                                                    |  |  |
| N                     | 3.59510600 -0.50773800 -0.26178600                                                |                                                                                    |  |  |
| 37                    | 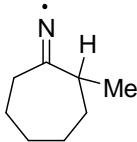 |  |  |  |
| Cartesian Coordinates |                                                                                   |                                                                                    |  |  |
| C                     | -1.66426100 1.06304200 -0.45493400                                                |                                                                                    |  |  |
| C                     | -2.26346700 -0.23780100 0.07467300                                                |                                                                                    |  |  |
| C                     | -1.40230000 -1.48382600 -0.10408900                                               |                                                                                    |  |  |
| C                     | -0.47301800 1.57888900 0.35733300                                                 |                                                                                    |  |  |
| C                     | 0.00822900 -1.41571800 0.48079400                                                 |                                                                                    |  |  |
| C                     | 0.87931700 0.95580000 0.03926200                                                  |                                                                                    |  |  |
| C                     | 0.99419100 -0.53172600 -0.29953000                                                |                                                                                    |  |  |
| H                     | -1.38770100 0.95673000 -1.51051400                                                |                                                                                    |  |  |
| H                     | -2.48734600 -0.10475600 1.14130100                                                |                                                                                    |  |  |
| H                     | -1.32116700 -1.71659500 -1.17401100                                               |                                                                                    |  |  |
| H                     | -0.02552500 -1.10817600 1.53320300                                                |                                                                                    |  |  |
| H                     | -0.66749500 1.40942100 1.42384300                                                 |                                                                                    |  |  |
| H                     | -2.43953200 1.83515900 -0.42640500                                                |                                                                                    |  |  |
| H                     | -3.22756100 -0.41046000 -0.41595500                                               |                                                                                    |  |  |
| H                     | -1.92869900 -2.33166200 0.34753100                                                |                                                                                    |  |  |
| H                     | -0.36032800 2.65786700 0.23459500                                                 |                                                                                    |  |  |
| H                     | 0.42165100 -2.42972300 0.48261000                                                 |                                                                                    |  |  |
| H                     | 0.72259200 -0.60247400 -1.36294500                                                |                                                                                    |  |  |
| N                     | 1.89116100 1.68722600 0.05507700                                                  |                                                                                    |  |  |
| C                     | 2.43315600 -1.01818800 -0.14963300                                                |                                                                                    |  |  |
| H                     | 2.52598500 -2.04377800 -0.51588700                                                |                                                                                    |  |  |
| H                     | 3.12600400 -0.38514800 -0.70571900                                                |                                                                                    |  |  |
| H                     | 2.73991600 -0.99982400 0.89956100                                                 |                                                                                    |  |  |

| No.                                                                                                                                                                                                                                                                                                                                                                                                                                                                                                                                                                                                                                                                                                                                                                                                                                                                                                                                                                                                                                                                                                                                                                                                                                                                                                                                                                                                                                                                                                                                                                                                                                                                                                                                                                                                                                                                                                                                                      | Species                                                                                                                                                                                                                                                                                 | Optimized Structure                                                                                                                                                                                                                                                         |             |             |            |             |   |             |             |            |   |             |             |             |   |             |            |            |   |             |             |            |   |             |             |             |   |             |             |             |   |            |            |             |   |             |            |            |   |             |            |             |   |             |            |            |   |            |             |            |   |            |            |             |   |             |            |             |   |             |            |             |   |            |            |            |   |             |            |            |   |             |             |             |   |            |             |             |   |             |             |            |   |             |             |             |   |             |             |             |   |             |             |            |
|----------------------------------------------------------------------------------------------------------------------------------------------------------------------------------------------------------------------------------------------------------------------------------------------------------------------------------------------------------------------------------------------------------------------------------------------------------------------------------------------------------------------------------------------------------------------------------------------------------------------------------------------------------------------------------------------------------------------------------------------------------------------------------------------------------------------------------------------------------------------------------------------------------------------------------------------------------------------------------------------------------------------------------------------------------------------------------------------------------------------------------------------------------------------------------------------------------------------------------------------------------------------------------------------------------------------------------------------------------------------------------------------------------------------------------------------------------------------------------------------------------------------------------------------------------------------------------------------------------------------------------------------------------------------------------------------------------------------------------------------------------------------------------------------------------------------------------------------------------------------------------------------------------------------------------------------------------|-----------------------------------------------------------------------------------------------------------------------------------------------------------------------------------------------------------------------------------------------------------------------------------------|-----------------------------------------------------------------------------------------------------------------------------------------------------------------------------------------------------------------------------------------------------------------------------|-------------|-------------|------------|-------------|---|-------------|-------------|------------|---|-------------|-------------|-------------|---|-------------|------------|------------|---|-------------|-------------|------------|---|-------------|-------------|-------------|---|-------------|-------------|-------------|---|------------|------------|-------------|---|-------------|------------|------------|---|-------------|------------|-------------|---|-------------|------------|------------|---|------------|-------------|------------|---|------------|------------|-------------|---|-------------|------------|-------------|---|-------------|------------|-------------|---|------------|------------|------------|---|-------------|------------|------------|---|-------------|-------------|-------------|---|------------|-------------|-------------|---|-------------|-------------|------------|---|-------------|-------------|-------------|---|-------------|-------------|-------------|---|-------------|-------------|------------|
| 38                                                                                                                                                                                                                                                                                                                                                                                                                                                                                                                                                                                                                                                                                                                                                                                                                                                                                                                                                                                                                                                                                                                                                                                                                                                                                                                                                                                                                                                                                                                                                                                                                                                                                                                                                                                                                                                                                                                                                       | 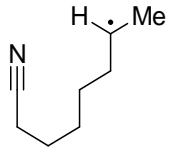 <p>Chemical structure of 6-methyl-1-hexanenitrile radical, showing a nitrile group (C≡N) at the end of a six-carbon chain with a methyl group (Me) and a radical center (H·) on the sixth carbon.</p> |  <p>3D ball-and-stick model of the optimized structure of 6-methyl-1-hexanenitrile radical, with carbon atoms in grey, hydrogen in white, nitrogen in blue, and oxygen in red.</p>        |             |             |            |             |   |             |             |            |   |             |             |             |   |             |            |            |   |             |             |            |   |             |             |             |   |             |             |             |   |            |            |             |   |             |            |            |   |             |            |             |   |             |            |            |   |            |             |            |   |            |            |             |   |             |            |             |   |             |            |             |   |            |            |            |   |             |            |            |   |             |             |             |   |            |             |             |   |             |             |            |   |             |             |             |   |             |             |             |   |             |             |            |
| <p>Cartesian Coordinates</p> <table border="1"> <tbody> <tr><td>C</td><td>1.01110300</td><td>1.28368500</td><td>-0.27968400</td></tr> <tr><td>C</td><td>-0.24748900</td><td>2.00821100</td><td>0.20765400</td></tr> <tr><td>C</td><td>-1.60273500</td><td>1.49632500</td><td>-0.29050900</td></tr> <tr><td>C</td><td>1.37281000</td><td>0.04226100</td><td>0.54629800</td></tr> <tr><td>C</td><td>-2.08659300</td><td>0.14133300</td><td>0.23744500</td></tr> <tr><td>C</td><td>2.59716300</td><td>-0.59383800</td><td>0.08951000</td></tr> <tr><td>C</td><td>-1.52381500</td><td>-1.05890700</td><td>-0.43754100</td></tr> <tr><td>H</td><td>0.89735700</td><td>0.99692300</td><td>-1.33002000</td></tr> <tr><td>H</td><td>-0.25064500</td><td>2.03487200</td><td>1.30535400</td></tr> <tr><td>H</td><td>-1.59654300</td><td>1.46894100</td><td>-1.38753700</td></tr> <tr><td>H</td><td>-1.91501500</td><td>0.07842400</td><td>1.32263800</td></tr> <tr><td>H</td><td>0.56322100</td><td>-0.69565100</td><td>0.48982700</td></tr> <tr><td>H</td><td>1.85882700</td><td>1.97377200</td><td>-0.24099200</td></tr> <tr><td>H</td><td>-0.16579500</td><td>3.05318400</td><td>-0.10893700</td></tr> <tr><td>H</td><td>-2.34868900</td><td>2.25001400</td><td>-0.01765700</td></tr> <tr><td>H</td><td>1.49786900</td><td>0.31198300</td><td>1.60022800</td></tr> <tr><td>H</td><td>-3.18655500</td><td>0.11317200</td><td>0.13609700</td></tr> <tr><td>H</td><td>-1.21415200</td><td>-0.95964400</td><td>-1.47457900</td></tr> <tr><td>N</td><td>3.56670100</td><td>-1.08954800</td><td>-0.28986900</td></tr> <tr><td>C</td><td>-1.77618300</td><td>-2.42199900</td><td>0.09521000</td></tr> <tr><td>H</td><td>-2.81053000</td><td>-2.74978300</td><td>-0.09928400</td></tr> <tr><td>H</td><td>-1.11901700</td><td>-3.16753100</td><td>-0.35849500</td></tr> <tr><td>H</td><td>-1.64281300</td><td>-2.46426400</td><td>1.18214500</td></tr> </tbody> </table> |                                                                                                                                                                                                                                                                                         |                                                                                                                                                                                                                                                                             | C           | 1.01110300  | 1.28368500 | -0.27968400 | C | -0.24748900 | 2.00821100  | 0.20765400 | C | -1.60273500 | 1.49632500  | -0.29050900 | C | 1.37281000  | 0.04226100 | 0.54629800 | C | -2.08659300 | 0.14133300  | 0.23744500 | C | 2.59716300  | -0.59383800 | 0.08951000  | C | -1.52381500 | -1.05890700 | -0.43754100 | H | 0.89735700 | 0.99692300 | -1.33002000 | H | -0.25064500 | 2.03487200 | 1.30535400 | H | -1.59654300 | 1.46894100 | -1.38753700 | H | -1.91501500 | 0.07842400 | 1.32263800 | H | 0.56322100 | -0.69565100 | 0.48982700 | H | 1.85882700 | 1.97377200 | -0.24099200 | H | -0.16579500 | 3.05318400 | -0.10893700 | H | -2.34868900 | 2.25001400 | -0.01765700 | H | 1.49786900 | 0.31198300 | 1.60022800 | H | -3.18655500 | 0.11317200 | 0.13609700 | H | -1.21415200 | -0.95964400 | -1.47457900 | N | 3.56670100 | -1.08954800 | -0.28986900 | C | -1.77618300 | -2.42199900 | 0.09521000 | H | -2.81053000 | -2.74978300 | -0.09928400 | H | -1.11901700 | -3.16753100 | -0.35849500 | H | -1.64281300 | -2.46426400 | 1.18214500 |
| C                                                                                                                                                                                                                                                                                                                                                                                                                                                                                                                                                                                                                                                                                                                                                                                                                                                                                                                                                                                                                                                                                                                                                                                                                                                                                                                                                                                                                                                                                                                                                                                                                                                                                                                                                                                                                                                                                                                                                        | 1.01110300                                                                                                                                                                                                                                                                              | 1.28368500                                                                                                                                                                                                                                                                  | -0.27968400 |             |            |             |   |             |             |            |   |             |             |             |   |             |            |            |   |             |             |            |   |             |             |             |   |             |             |             |   |            |            |             |   |             |            |            |   |             |            |             |   |             |            |            |   |            |             |            |   |            |            |             |   |             |            |             |   |             |            |             |   |            |            |            |   |             |            |            |   |             |             |             |   |            |             |             |   |             |             |            |   |             |             |             |   |             |             |             |   |             |             |            |
| C                                                                                                                                                                                                                                                                                                                                                                                                                                                                                                                                                                                                                                                                                                                                                                                                                                                                                                                                                                                                                                                                                                                                                                                                                                                                                                                                                                                                                                                                                                                                                                                                                                                                                                                                                                                                                                                                                                                                                        | -0.24748900                                                                                                                                                                                                                                                                             | 2.00821100                                                                                                                                                                                                                                                                  | 0.20765400  |             |            |             |   |             |             |            |   |             |             |             |   |             |            |            |   |             |             |            |   |             |             |             |   |             |             |             |   |            |            |             |   |             |            |            |   |             |            |             |   |             |            |            |   |            |             |            |   |            |            |             |   |             |            |             |   |             |            |             |   |            |            |            |   |             |            |            |   |             |             |             |   |            |             |             |   |             |             |            |   |             |             |             |   |             |             |             |   |             |             |            |
| C                                                                                                                                                                                                                                                                                                                                                                                                                                                                                                                                                                                                                                                                                                                                                                                                                                                                                                                                                                                                                                                                                                                                                                                                                                                                                                                                                                                                                                                                                                                                                                                                                                                                                                                                                                                                                                                                                                                                                        | -1.60273500                                                                                                                                                                                                                                                                             | 1.49632500                                                                                                                                                                                                                                                                  | -0.29050900 |             |            |             |   |             |             |            |   |             |             |             |   |             |            |            |   |             |             |            |   |             |             |             |   |             |             |             |   |            |            |             |   |             |            |            |   |             |            |             |   |             |            |            |   |            |             |            |   |            |            |             |   |             |            |             |   |             |            |             |   |            |            |            |   |             |            |            |   |             |             |             |   |            |             |             |   |             |             |            |   |             |             |             |   |             |             |             |   |             |             |            |
| C                                                                                                                                                                                                                                                                                                                                                                                                                                                                                                                                                                                                                                                                                                                                                                                                                                                                                                                                                                                                                                                                                                                                                                                                                                                                                                                                                                                                                                                                                                                                                                                                                                                                                                                                                                                                                                                                                                                                                        | 1.37281000                                                                                                                                                                                                                                                                              | 0.04226100                                                                                                                                                                                                                                                                  | 0.54629800  |             |            |             |   |             |             |            |   |             |             |             |   |             |            |            |   |             |             |            |   |             |             |             |   |             |             |             |   |            |            |             |   |             |            |            |   |             |            |             |   |             |            |            |   |            |             |            |   |            |            |             |   |             |            |             |   |             |            |             |   |            |            |            |   |             |            |            |   |             |             |             |   |            |             |             |   |             |             |            |   |             |             |             |   |             |             |             |   |             |             |            |
| C                                                                                                                                                                                                                                                                                                                                                                                                                                                                                                                                                                                                                                                                                                                                                                                                                                                                                                                                                                                                                                                                                                                                                                                                                                                                                                                                                                                                                                                                                                                                                                                                                                                                                                                                                                                                                                                                                                                                                        | -2.08659300                                                                                                                                                                                                                                                                             | 0.14133300                                                                                                                                                                                                                                                                  | 0.23744500  |             |            |             |   |             |             |            |   |             |             |             |   |             |            |            |   |             |             |            |   |             |             |             |   |             |             |             |   |            |            |             |   |             |            |            |   |             |            |             |   |             |            |            |   |            |             |            |   |            |            |             |   |             |            |             |   |             |            |             |   |            |            |            |   |             |            |            |   |             |             |             |   |            |             |             |   |             |             |            |   |             |             |             |   |             |             |             |   |             |             |            |
| C                                                                                                                                                                                                                                                                                                                                                                                                                                                                                                                                                                                                                                                                                                                                                                                                                                                                                                                                                                                                                                                                                                                                                                                                                                                                                                                                                                                                                                                                                                                                                                                                                                                                                                                                                                                                                                                                                                                                                        | 2.59716300                                                                                                                                                                                                                                                                              | -0.59383800                                                                                                                                                                                                                                                                 | 0.08951000  |             |            |             |   |             |             |            |   |             |             |             |   |             |            |            |   |             |             |            |   |             |             |             |   |             |             |             |   |            |            |             |   |             |            |            |   |             |            |             |   |             |            |            |   |            |             |            |   |            |            |             |   |             |            |             |   |             |            |             |   |            |            |            |   |             |            |            |   |             |             |             |   |            |             |             |   |             |             |            |   |             |             |             |   |             |             |             |   |             |             |            |
| C                                                                                                                                                                                                                                                                                                                                                                                                                                                                                                                                                                                                                                                                                                                                                                                                                                                                                                                                                                                                                                                                                                                                                                                                                                                                                                                                                                                                                                                                                                                                                                                                                                                                                                                                                                                                                                                                                                                                                        | -1.52381500                                                                                                                                                                                                                                                                             | -1.05890700                                                                                                                                                                                                                                                                 | -0.43754100 |             |            |             |   |             |             |            |   |             |             |             |   |             |            |            |   |             |             |            |   |             |             |             |   |             |             |             |   |            |            |             |   |             |            |            |   |             |            |             |   |             |            |            |   |            |             |            |   |            |            |             |   |             |            |             |   |             |            |             |   |            |            |            |   |             |            |            |   |             |             |             |   |            |             |             |   |             |             |            |   |             |             |             |   |             |             |             |   |             |             |            |
| H                                                                                                                                                                                                                                                                                                                                                                                                                                                                                                                                                                                                                                                                                                                                                                                                                                                                                                                                                                                                                                                                                                                                                                                                                                                                                                                                                                                                                                                                                                                                                                                                                                                                                                                                                                                                                                                                                                                                                        | 0.89735700                                                                                                                                                                                                                                                                              | 0.99692300                                                                                                                                                                                                                                                                  | -1.33002000 |             |            |             |   |             |             |            |   |             |             |             |   |             |            |            |   |             |             |            |   |             |             |             |   |             |             |             |   |            |            |             |   |             |            |            |   |             |            |             |   |             |            |            |   |            |             |            |   |            |            |             |   |             |            |             |   |             |            |             |   |            |            |            |   |             |            |            |   |             |             |             |   |            |             |             |   |             |             |            |   |             |             |             |   |             |             |             |   |             |             |            |
| H                                                                                                                                                                                                                                                                                                                                                                                                                                                                                                                                                                                                                                                                                                                                                                                                                                                                                                                                                                                                                                                                                                                                                                                                                                                                                                                                                                                                                                                                                                                                                                                                                                                                                                                                                                                                                                                                                                                                                        | -0.25064500                                                                                                                                                                                                                                                                             | 2.03487200                                                                                                                                                                                                                                                                  | 1.30535400  |             |            |             |   |             |             |            |   |             |             |             |   |             |            |            |   |             |             |            |   |             |             |             |   |             |             |             |   |            |            |             |   |             |            |            |   |             |            |             |   |             |            |            |   |            |             |            |   |            |            |             |   |             |            |             |   |             |            |             |   |            |            |            |   |             |            |            |   |             |             |             |   |            |             |             |   |             |             |            |   |             |             |             |   |             |             |             |   |             |             |            |
| H                                                                                                                                                                                                                                                                                                                                                                                                                                                                                                                                                                                                                                                                                                                                                                                                                                                                                                                                                                                                                                                                                                                                                                                                                                                                                                                                                                                                                                                                                                                                                                                                                                                                                                                                                                                                                                                                                                                                                        | -1.59654300                                                                                                                                                                                                                                                                             | 1.46894100                                                                                                                                                                                                                                                                  | -1.38753700 |             |            |             |   |             |             |            |   |             |             |             |   |             |            |            |   |             |             |            |   |             |             |             |   |             |             |             |   |            |            |             |   |             |            |            |   |             |            |             |   |             |            |            |   |            |             |            |   |            |            |             |   |             |            |             |   |             |            |             |   |            |            |            |   |             |            |            |   |             |             |             |   |            |             |             |   |             |             |            |   |             |             |             |   |             |             |             |   |             |             |            |
| H                                                                                                                                                                                                                                                                                                                                                                                                                                                                                                                                                                                                                                                                                                                                                                                                                                                                                                                                                                                                                                                                                                                                                                                                                                                                                                                                                                                                                                                                                                                                                                                                                                                                                                                                                                                                                                                                                                                                                        | -1.91501500                                                                                                                                                                                                                                                                             | 0.07842400                                                                                                                                                                                                                                                                  | 1.32263800  |             |            |             |   |             |             |            |   |             |             |             |   |             |            |            |   |             |             |            |   |             |             |             |   |             |             |             |   |            |            |             |   |             |            |            |   |             |            |             |   |             |            |            |   |            |             |            |   |            |            |             |   |             |            |             |   |             |            |             |   |            |            |            |   |             |            |            |   |             |             |             |   |            |             |             |   |             |             |            |   |             |             |             |   |             |             |             |   |             |             |            |
| H                                                                                                                                                                                                                                                                                                                                                                                                                                                                                                                                                                                                                                                                                                                                                                                                                                                                                                                                                                                                                                                                                                                                                                                                                                                                                                                                                                                                                                                                                                                                                                                                                                                                                                                                                                                                                                                                                                                                                        | 0.56322100                                                                                                                                                                                                                                                                              | -0.69565100                                                                                                                                                                                                                                                                 | 0.48982700  |             |            |             |   |             |             |            |   |             |             |             |   |             |            |            |   |             |             |            |   |             |             |             |   |             |             |             |   |            |            |             |   |             |            |            |   |             |            |             |   |             |            |            |   |            |             |            |   |            |            |             |   |             |            |             |   |             |            |             |   |            |            |            |   |             |            |            |   |             |             |             |   |            |             |             |   |             |             |            |   |             |             |             |   |             |             |             |   |             |             |            |
| H                                                                                                                                                                                                                                                                                                                                                                                                                                                                                                                                                                                                                                                                                                                                                                                                                                                                                                                                                                                                                                                                                                                                                                                                                                                                                                                                                                                                                                                                                                                                                                                                                                                                                                                                                                                                                                                                                                                                                        | 1.85882700                                                                                                                                                                                                                                                                              | 1.97377200                                                                                                                                                                                                                                                                  | -0.24099200 |             |            |             |   |             |             |            |   |             |             |             |   |             |            |            |   |             |             |            |   |             |             |             |   |             |             |             |   |            |            |             |   |             |            |            |   |             |            |             |   |             |            |            |   |            |             |            |   |            |            |             |   |             |            |             |   |             |            |             |   |            |            |            |   |             |            |            |   |             |             |             |   |            |             |             |   |             |             |            |   |             |             |             |   |             |             |             |   |             |             |            |
| H                                                                                                                                                                                                                                                                                                                                                                                                                                                                                                                                                                                                                                                                                                                                                                                                                                                                                                                                                                                                                                                                                                                                                                                                                                                                                                                                                                                                                                                                                                                                                                                                                                                                                                                                                                                                                                                                                                                                                        | -0.16579500                                                                                                                                                                                                                                                                             | 3.05318400                                                                                                                                                                                                                                                                  | -0.10893700 |             |            |             |   |             |             |            |   |             |             |             |   |             |            |            |   |             |             |            |   |             |             |             |   |             |             |             |   |            |            |             |   |             |            |            |   |             |            |             |   |             |            |            |   |            |             |            |   |            |            |             |   |             |            |             |   |             |            |             |   |            |            |            |   |             |            |            |   |             |             |             |   |            |             |             |   |             |             |            |   |             |             |             |   |             |             |             |   |             |             |            |
| H                                                                                                                                                                                                                                                                                                                                                                                                                                                                                                                                                                                                                                                                                                                                                                                                                                                                                                                                                                                                                                                                                                                                                                                                                                                                                                                                                                                                                                                                                                                                                                                                                                                                                                                                                                                                                                                                                                                                                        | -2.34868900                                                                                                                                                                                                                                                                             | 2.25001400                                                                                                                                                                                                                                                                  | -0.01765700 |             |            |             |   |             |             |            |   |             |             |             |   |             |            |            |   |             |             |            |   |             |             |             |   |             |             |             |   |            |            |             |   |             |            |            |   |             |            |             |   |             |            |            |   |            |             |            |   |            |            |             |   |             |            |             |   |             |            |             |   |            |            |            |   |             |            |            |   |             |             |             |   |            |             |             |   |             |             |            |   |             |             |             |   |             |             |             |   |             |             |            |
| H                                                                                                                                                                                                                                                                                                                                                                                                                                                                                                                                                                                                                                                                                                                                                                                                                                                                                                                                                                                                                                                                                                                                                                                                                                                                                                                                                                                                                                                                                                                                                                                                                                                                                                                                                                                                                                                                                                                                                        | 1.49786900                                                                                                                                                                                                                                                                              | 0.31198300                                                                                                                                                                                                                                                                  | 1.60022800  |             |            |             |   |             |             |            |   |             |             |             |   |             |            |            |   |             |             |            |   |             |             |             |   |             |             |             |   |            |            |             |   |             |            |            |   |             |            |             |   |             |            |            |   |            |             |            |   |            |            |             |   |             |            |             |   |             |            |             |   |            |            |            |   |             |            |            |   |             |             |             |   |            |             |             |   |             |             |            |   |             |             |             |   |             |             |             |   |             |             |            |
| H                                                                                                                                                                                                                                                                                                                                                                                                                                                                                                                                                                                                                                                                                                                                                                                                                                                                                                                                                                                                                                                                                                                                                                                                                                                                                                                                                                                                                                                                                                                                                                                                                                                                                                                                                                                                                                                                                                                                                        | -3.18655500                                                                                                                                                                                                                                                                             | 0.11317200                                                                                                                                                                                                                                                                  | 0.13609700  |             |            |             |   |             |             |            |   |             |             |             |   |             |            |            |   |             |             |            |   |             |             |             |   |             |             |             |   |            |            |             |   |             |            |            |   |             |            |             |   |             |            |            |   |            |             |            |   |            |            |             |   |             |            |             |   |             |            |             |   |            |            |            |   |             |            |            |   |             |             |             |   |            |             |             |   |             |             |            |   |             |             |             |   |             |             |             |   |             |             |            |
| H                                                                                                                                                                                                                                                                                                                                                                                                                                                                                                                                                                                                                                                                                                                                                                                                                                                                                                                                                                                                                                                                                                                                                                                                                                                                                                                                                                                                                                                                                                                                                                                                                                                                                                                                                                                                                                                                                                                                                        | -1.21415200                                                                                                                                                                                                                                                                             | -0.95964400                                                                                                                                                                                                                                                                 | -1.47457900 |             |            |             |   |             |             |            |   |             |             |             |   |             |            |            |   |             |             |            |   |             |             |             |   |             |             |             |   |            |            |             |   |             |            |            |   |             |            |             |   |             |            |            |   |            |             |            |   |            |            |             |   |             |            |             |   |             |            |             |   |            |            |            |   |             |            |            |   |             |             |             |   |            |             |             |   |             |             |            |   |             |             |             |   |             |             |             |   |             |             |            |
| N                                                                                                                                                                                                                                                                                                                                                                                                                                                                                                                                                                                                                                                                                                                                                                                                                                                                                                                                                                                                                                                                                                                                                                                                                                                                                                                                                                                                                                                                                                                                                                                                                                                                                                                                                                                                                                                                                                                                                        | 3.56670100                                                                                                                                                                                                                                                                              | -1.08954800                                                                                                                                                                                                                                                                 | -0.28986900 |             |            |             |   |             |             |            |   |             |             |             |   |             |            |            |   |             |             |            |   |             |             |             |   |             |             |             |   |            |            |             |   |             |            |            |   |             |            |             |   |             |            |            |   |            |             |            |   |            |            |             |   |             |            |             |   |             |            |             |   |            |            |            |   |             |            |            |   |             |             |             |   |            |             |             |   |             |             |            |   |             |             |             |   |             |             |             |   |             |             |            |
| C                                                                                                                                                                                                                                                                                                                                                                                                                                                                                                                                                                                                                                                                                                                                                                                                                                                                                                                                                                                                                                                                                                                                                                                                                                                                                                                                                                                                                                                                                                                                                                                                                                                                                                                                                                                                                                                                                                                                                        | -1.77618300                                                                                                                                                                                                                                                                             | -2.42199900                                                                                                                                                                                                                                                                 | 0.09521000  |             |            |             |   |             |             |            |   |             |             |             |   |             |            |            |   |             |             |            |   |             |             |             |   |             |             |             |   |            |            |             |   |             |            |            |   |             |            |             |   |             |            |            |   |            |             |            |   |            |            |             |   |             |            |             |   |             |            |             |   |            |            |            |   |             |            |            |   |             |             |             |   |            |             |             |   |             |             |            |   |             |             |             |   |             |             |             |   |             |             |            |
| H                                                                                                                                                                                                                                                                                                                                                                                                                                                                                                                                                                                                                                                                                                                                                                                                                                                                                                                                                                                                                                                                                                                                                                                                                                                                                                                                                                                                                                                                                                                                                                                                                                                                                                                                                                                                                                                                                                                                                        | -2.81053000                                                                                                                                                                                                                                                                             | -2.74978300                                                                                                                                                                                                                                                                 | -0.09928400 |             |            |             |   |             |             |            |   |             |             |             |   |             |            |            |   |             |             |            |   |             |             |             |   |             |             |             |   |            |            |             |   |             |            |            |   |             |            |             |   |             |            |            |   |            |             |            |   |            |            |             |   |             |            |             |   |             |            |             |   |            |            |            |   |             |            |            |   |             |             |             |   |            |             |             |   |             |             |            |   |             |             |             |   |             |             |             |   |             |             |            |
| H                                                                                                                                                                                                                                                                                                                                                                                                                                                                                                                                                                                                                                                                                                                                                                                                                                                                                                                                                                                                                                                                                                                                                                                                                                                                                                                                                                                                                                                                                                                                                                                                                                                                                                                                                                                                                                                                                                                                                        | -1.11901700                                                                                                                                                                                                                                                                             | -3.16753100                                                                                                                                                                                                                                                                 | -0.35849500 |             |            |             |   |             |             |            |   |             |             |             |   |             |            |            |   |             |             |            |   |             |             |             |   |             |             |             |   |            |            |             |   |             |            |            |   |             |            |             |   |             |            |            |   |            |             |            |   |            |            |             |   |             |            |             |   |             |            |             |   |            |            |            |   |             |            |            |   |             |             |             |   |            |             |             |   |             |             |            |   |             |             |             |   |             |             |             |   |             |             |            |
| H                                                                                                                                                                                                                                                                                                                                                                                                                                                                                                                                                                                                                                                                                                                                                                                                                                                                                                                                                                                                                                                                                                                                                                                                                                                                                                                                                                                                                                                                                                                                                                                                                                                                                                                                                                                                                                                                                                                                                        | -1.64281300                                                                                                                                                                                                                                                                             | -2.46426400                                                                                                                                                                                                                                                                 | 1.18214500  |             |            |             |   |             |             |            |   |             |             |             |   |             |            |            |   |             |             |            |   |             |             |             |   |             |             |             |   |            |            |             |   |             |            |            |   |             |            |             |   |             |            |            |   |            |             |            |   |            |            |             |   |             |            |             |   |             |            |             |   |            |            |            |   |             |            |            |   |             |             |             |   |            |             |             |   |             |             |            |   |             |             |             |   |             |             |             |   |             |             |            |
| 39                                                                                                                                                                                                                                                                                                                                                                                                                                                                                                                                                                                                                                                                                                                                                                                                                                                                                                                                                                                                                                                                                                                                                                                                                                                                                                                                                                                                                                                                                                                                                                                                                                                                                                                                                                                                                                                                                                                                                       |  <p>Chemical structure of 1-phenylcycloheptan-1-ylidene radical, showing a seven-membered ring with a phenyl group (Ph) and a radical center (N·) on the same carbon.</p>                            |  <p>3D ball-and-stick model of the optimized structure of 1-phenylcycloheptan-1-ylidene radical, with carbon atoms in grey, hydrogen in white, nitrogen in blue, and oxygen in red.</p> |             |             |            |             |   |             |             |            |   |             |             |             |   |             |            |            |   |             |             |            |   |             |             |             |   |             |             |             |   |            |            |             |   |             |            |            |   |             |            |             |   |             |            |            |   |            |             |            |   |            |            |             |   |             |            |             |   |             |            |             |   |            |            |            |   |             |            |            |   |             |             |             |   |            |             |             |   |             |             |            |   |             |             |             |   |             |             |             |   |             |             |            |
| <p>Cartesian Coordinates</p> <table border="1"> <tbody> <tr><td>C</td><td>-3.34014100</td><td>0.36363700</td><td>-0.56026000</td></tr> <tr><td>C</td><td>-3.44777300</td><td>-0.91079200</td><td>0.27453500</td></tr> <tr><td>C</td><td>-2.20286900</td><td>-1.79010500</td><td>0.29924600</td></tr> <tr><td>C</td><td>-2.41042000</td><td>1.42340200</td><td>0.03793800</td></tr> <tr><td>C</td><td>-0.90916800</td><td>-1.11811900</td><td>0.75870700</td></tr> <tr><td>C</td><td>-0.92357700</td><td>1.25551900</td><td>-0.24288300</td></tr> <tr><td>C</td><td>-0.29264900</td><td>-0.13952200</td><td>-0.26512400</td></tr> </tbody> </table>                                                                                                                                                                                                                                                                                                                                                                                                                                                                                                                                                                                                                                                                                                                                                                                                                                                                                                                                                                                                                                                                                                                                                                                                                                                                                                       |                                                                                                                                                                                                                                                                                         |                                                                                                                                                                                                                                                                             | C           | -3.34014100 | 0.36363700 | -0.56026000 | C | -3.44777300 | -0.91079200 | 0.27453500 | C | -2.20286900 | -1.79010500 | 0.29924600  | C | -2.41042000 | 1.42340200 | 0.03793800 | C | -0.90916800 | -1.11811900 | 0.75870700 | C | -0.92357700 | 1.25551900  | -0.24288300 | C | -0.29264900 | -0.13952200 | -0.26512400 |   |            |            |             |   |             |            |            |   |             |            |             |   |             |            |            |   |            |             |            |   |            |            |             |   |             |            |             |   |             |            |             |   |            |            |            |   |             |            |            |   |             |             |             |   |            |             |             |   |             |             |            |   |             |             |             |   |             |             |             |   |             |             |            |
| C                                                                                                                                                                                                                                                                                                                                                                                                                                                                                                                                                                                                                                                                                                                                                                                                                                                                                                                                                                                                                                                                                                                                                                                                                                                                                                                                                                                                                                                                                                                                                                                                                                                                                                                                                                                                                                                                                                                                                        | -3.34014100                                                                                                                                                                                                                                                                             | 0.36363700                                                                                                                                                                                                                                                                  | -0.56026000 |             |            |             |   |             |             |            |   |             |             |             |   |             |            |            |   |             |             |            |   |             |             |             |   |             |             |             |   |            |            |             |   |             |            |            |   |             |            |             |   |             |            |            |   |            |             |            |   |            |            |             |   |             |            |             |   |             |            |             |   |            |            |            |   |             |            |            |   |             |             |             |   |            |             |             |   |             |             |            |   |             |             |             |   |             |             |             |   |             |             |            |
| C                                                                                                                                                                                                                                                                                                                                                                                                                                                                                                                                                                                                                                                                                                                                                                                                                                                                                                                                                                                                                                                                                                                                                                                                                                                                                                                                                                                                                                                                                                                                                                                                                                                                                                                                                                                                                                                                                                                                                        | -3.44777300                                                                                                                                                                                                                                                                             | -0.91079200                                                                                                                                                                                                                                                                 | 0.27453500  |             |            |             |   |             |             |            |   |             |             |             |   |             |            |            |   |             |             |            |   |             |             |             |   |             |             |             |   |            |            |             |   |             |            |            |   |             |            |             |   |             |            |            |   |            |             |            |   |            |            |             |   |             |            |             |   |             |            |             |   |            |            |            |   |             |            |            |   |             |             |             |   |            |             |             |   |             |             |            |   |             |             |             |   |             |             |             |   |             |             |            |
| C                                                                                                                                                                                                                                                                                                                                                                                                                                                                                                                                                                                                                                                                                                                                                                                                                                                                                                                                                                                                                                                                                                                                                                                                                                                                                                                                                                                                                                                                                                                                                                                                                                                                                                                                                                                                                                                                                                                                                        | -2.20286900                                                                                                                                                                                                                                                                             | -1.79010500                                                                                                                                                                                                                                                                 | 0.29924600  |             |            |             |   |             |             |            |   |             |             |             |   |             |            |            |   |             |             |            |   |             |             |             |   |             |             |             |   |            |            |             |   |             |            |            |   |             |            |             |   |             |            |            |   |            |             |            |   |            |            |             |   |             |            |             |   |             |            |             |   |            |            |            |   |             |            |            |   |             |             |             |   |            |             |             |   |             |             |            |   |             |             |             |   |             |             |             |   |             |             |            |
| C                                                                                                                                                                                                                                                                                                                                                                                                                                                                                                                                                                                                                                                                                                                                                                                                                                                                                                                                                                                                                                                                                                                                                                                                                                                                                                                                                                                                                                                                                                                                                                                                                                                                                                                                                                                                                                                                                                                                                        | -2.41042000                                                                                                                                                                                                                                                                             | 1.42340200                                                                                                                                                                                                                                                                  | 0.03793800  |             |            |             |   |             |             |            |   |             |             |             |   |             |            |            |   |             |             |            |   |             |             |             |   |             |             |             |   |            |            |             |   |             |            |            |   |             |            |             |   |             |            |            |   |            |             |            |   |            |            |             |   |             |            |             |   |             |            |             |   |            |            |            |   |             |            |            |   |             |             |             |   |            |             |             |   |             |             |            |   |             |             |             |   |             |             |             |   |             |             |            |
| C                                                                                                                                                                                                                                                                                                                                                                                                                                                                                                                                                                                                                                                                                                                                                                                                                                                                                                                                                                                                                                                                                                                                                                                                                                                                                                                                                                                                                                                                                                                                                                                                                                                                                                                                                                                                                                                                                                                                                        | -0.90916800                                                                                                                                                                                                                                                                             | -1.11811900                                                                                                                                                                                                                                                                 | 0.75870700  |             |            |             |   |             |             |            |   |             |             |             |   |             |            |            |   |             |             |            |   |             |             |             |   |             |             |             |   |            |            |             |   |             |            |            |   |             |            |             |   |             |            |            |   |            |             |            |   |            |            |             |   |             |            |             |   |             |            |             |   |            |            |            |   |             |            |            |   |             |             |             |   |            |             |             |   |             |             |            |   |             |             |             |   |             |             |             |   |             |             |            |
| C                                                                                                                                                                                                                                                                                                                                                                                                                                                                                                                                                                                                                                                                                                                                                                                                                                                                                                                                                                                                                                                                                                                                                                                                                                                                                                                                                                                                                                                                                                                                                                                                                                                                                                                                                                                                                                                                                                                                                        | -0.92357700                                                                                                                                                                                                                                                                             | 1.25551900                                                                                                                                                                                                                                                                  | -0.24288300 |             |            |             |   |             |             |            |   |             |             |             |   |             |            |            |   |             |             |            |   |             |             |             |   |             |             |             |   |            |            |             |   |             |            |            |   |             |            |             |   |             |            |            |   |            |             |            |   |            |            |             |   |             |            |             |   |             |            |             |   |            |            |            |   |             |            |            |   |             |             |             |   |            |             |             |   |             |             |            |   |             |             |             |   |             |             |             |   |             |             |            |
| C                                                                                                                                                                                                                                                                                                                                                                                                                                                                                                                                                                                                                                                                                                                                                                                                                                                                                                                                                                                                                                                                                                                                                                                                                                                                                                                                                                                                                                                                                                                                                                                                                                                                                                                                                                                                                                                                                                                                                        | -0.29264900                                                                                                                                                                                                                                                                             | -0.13952200                                                                                                                                                                                                                                                                 | -0.26512400 |             |            |             |   |             |             |            |   |             |             |             |   |             |            |            |   |             |             |            |   |             |             |             |   |             |             |             |   |            |            |             |   |             |            |            |   |             |            |             |   |             |            |            |   |            |             |            |   |            |            |             |   |             |            |             |   |             |            |             |   |            |            |            |   |             |            |            |   |             |             |             |   |            |             |             |   |             |             |            |   |             |             |             |   |             |             |             |   |             |             |            |

| No.                   | Species                                                                             | Optimized Structure                                                                  |  |
|-----------------------|-------------------------------------------------------------------------------------|--------------------------------------------------------------------------------------|--|
| H                     | -3.03622600 0.12630500 -1.58675200                                                  |                                                                                      |  |
| H                     | -3.70967500 -0.62777200 1.30247500                                                  |                                                                                      |  |
| H                     | -2.03625600 -2.21001500 -0.70140700                                                 |                                                                                      |  |
| H                     | -1.05310700 -0.61610800 1.72289800                                                  |                                                                                      |  |
| H                     | -2.53835700 1.43662900 1.12764700                                                   |                                                                                      |  |
| H                     | -4.33690000 0.80840600 -0.64016100                                                  |                                                                                      |  |
| H                     | -4.28690700 -1.50937500 -0.09616400                                                 |                                                                                      |  |
| H                     | -2.39969800 -2.64617700 0.95354500                                                  |                                                                                      |  |
| H                     | -2.68439800 2.41963700 -0.31471700                                                  |                                                                                      |  |
| H                     | -0.16339100 -1.89760400 0.93734900                                                  |                                                                                      |  |
| N                     | -0.24275300 2.27717500 -0.47106100                                                  |                                                                                      |  |
| H                     | -0.52448700 -0.53658000 -1.26268800                                                 |                                                                                      |  |
| C                     | 1.21539700 -0.09581100 -0.14358400                                                  |                                                                                      |  |
| C                     | 2.01163500 -0.74103400 -1.08697300                                                  |                                                                                      |  |
| C                     | 1.83742300 0.52266200 0.94233800                                                    |                                                                                      |  |
| C                     | 3.39544200 -0.77335800 -0.95314700                                                  |                                                                                      |  |
| H                     | 1.54353200 -1.22055200 -1.94141300                                                  |                                                                                      |  |
| C                     | 3.21784100 0.48975800 1.08087100                                                    |                                                                                      |  |
| H                     | 1.23781300 1.04900100 1.67658700                                                    |                                                                                      |  |
| C                     | 4.00282200 -0.15944500 0.13383000                                                   |                                                                                      |  |
| H                     | 3.99766400 -1.27576200 -1.70216000                                                  |                                                                                      |  |
| H                     | 3.68434500 0.97949700 1.92858700                                                    |                                                                                      |  |
| H                     | 5.08155500 -0.18051100 0.24083900                                                   |                                                                                      |  |
| 40                    | 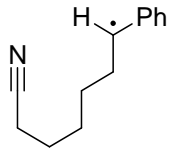 |  |  |
| Cartesian Coordinates |                                                                                     |                                                                                      |  |
| C                     | 3.00019700 0.22632400 0.14345700                                                    |                                                                                      |  |
| C                     | 3.07264100 -1.25609300 -0.23791600                                                  |                                                                                      |  |
| C                     | 2.06670900 -2.20870800 0.41534900                                                   |                                                                                      |  |
| C                     | 2.01723700 1.04470700 -0.70599300                                                   |                                                                                      |  |
| C                     | 0.59451500 -2.05497200 0.02020500                                                   |                                                                                      |  |
| C                     | 2.01949500 2.45276000 -0.34339200                                                   |                                                                                      |  |
| C                     | -0.14170700 -0.97466400 0.73359300                                                  |                                                                                      |  |
| H                     | 2.74048900 0.33358600 1.20149700                                                    |                                                                                      |  |
| H                     | 3.00819900 -1.35370600 -1.32950600                                                  |                                                                                      |  |
| H                     | 2.15396300 -2.13430700 1.50650600                                                   |                                                                                      |  |
| H                     | 0.51986600 -1.92112400 -1.06827700                                                  |                                                                                      |  |
| H                     | 0.99512300 0.66799200 -0.59509800                                                   |                                                                                      |  |
| H                     | 3.99163600 0.67359900 0.02862300                                                    |                                                                                      |  |
| H                     | 4.07136500 -1.61668300 0.02858800                                                   |                                                                                      |  |



| No.                   | Species                                                                           | Optimized Structure                                                                 |
|-----------------------|-----------------------------------------------------------------------------------|-------------------------------------------------------------------------------------|
| H                     | 2.37933700 -3.22707200 0.16286400                                                 |                                                                                     |
| H                     | 2.27865300 0.96349000 -1.76633100                                                 |                                                                                     |
| H                     | 0.08575600 -3.01293500 0.21566800                                                 |                                                                                     |
| N                     | 2.03634300 3.56383800 -0.03593400                                                 |                                                                                     |
| H                     | 0.29414100 -0.59066300 1.65209900                                                 |                                                                                     |
| C                     | -1.41491600 -0.47694100 0.36373800                                                |                                                                                     |
| C                     | -2.02804700 0.54307300 1.13236000                                                 |                                                                                     |
| C                     | -2.12409400 -0.95536100 -0.76465900                                               |                                                                                     |
| C                     | -3.26484100 1.05225300 0.79086800                                                 |                                                                                     |
| H                     | -1.50375400 0.92839400 2.00094500                                                 |                                                                                     |
| C                     | -3.36391500 -0.44003800 -1.09652400                                               |                                                                                     |
| H                     | -1.69412600 -1.74309800 -1.37249900                                               |                                                                                     |
| C                     | -3.94384100 0.56553000 -0.32620100                                                |                                                                                     |
| H                     | -3.70838000 1.83634500 1.39450500                                                 |                                                                                     |
| H                     | -3.88865900 -0.82467600 -1.96437800                                               |                                                                                     |
| H                     | -4.91460700 0.96677400 -0.59297800                                                |                                                                                     |
| 41                    | 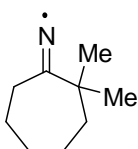 |  |
| Cartesian Coordinates |                                                                                   |                                                                                     |
| C                     | -2.15433500 0.78067200 -0.04825300                                                |                                                                                     |
| C                     | -2.28040600 -0.73768900 0.03243000                                                |                                                                                     |
| C                     | -1.07095300 -1.52897200 -0.46812000                                               |                                                                                     |
| C                     | -0.90939500 1.36921100 0.62728100                                                 |                                                                                     |
| C                     | 0.16535600 -1.39877700 0.42837000                                                 |                                                                                     |
| C                     | 0.35583500 1.06431900 -0.16318000                                                 |                                                                                     |
| C                     | 1.12922600 -0.23859800 0.10939200                                                 |                                                                                     |
| H                     | -2.15258100 1.09871700 -1.09632600                                                |                                                                                     |
| H                     | -2.47509800 -1.02806500 1.07324600                                                |                                                                                     |
| H                     | -0.82741400 -1.23012500 -1.49500800                                               |                                                                                     |
| H                     | -0.16421800 -1.32570800 1.47199500                                                |                                                                                     |
| H                     | -0.80835000 0.98903700 1.64970000                                                 |                                                                                     |
| H                     | -3.04039500 1.23251600 0.41026700                                                 |                                                                                     |
| H                     | -3.16713200 -1.03899000 -0.53550000                                               |                                                                                     |
| H                     | -1.35488900 -2.58444100 -0.52264300                                               |                                                                                     |
| H                     | -1.00953100 2.45449500 0.68810700                                                 |                                                                                     |
| H                     | 0.76111100 -2.31652200 0.37276100                                                 |                                                                                     |
| N                     | 0.74587600 1.88064400 -1.02161600                                                 |                                                                                     |
| C                     | 2.03043300 0.01377700 1.32544700                                                  |                                                                                     |
| H                     | 2.55391000 -0.90840700 1.59671000                                                 |                                                                                     |
| H                     | 2.77626800 0.78059800 1.10489400                                                  |                                                                                     |

| No.                   | Species                                                                             | Optimized Structure                                                                |                                                                                      |
|-----------------------|-------------------------------------------------------------------------------------|------------------------------------------------------------------------------------|--------------------------------------------------------------------------------------|
| H                     | 1.45395100 0.33721600 2.19681300                                                    |                                                                                    |                                                                                      |
| C                     | 1.99725400 -0.58869900 -1.10093500                                                  |                                                                                    |                                                                                      |
| H                     | 1.38685000 -0.81890600 -1.97718700                                                  |                                                                                    |                                                                                      |
| H                     | 2.65125400 0.24378000 -1.36641200                                                   |                                                                                    |                                                                                      |
| H                     | 2.61704000 -1.46116300 -0.87469500                                                  |                                                                                    |                                                                                      |
| 42                    | 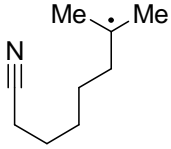   |  |                                                                                      |
| Cartesian Coordinates |                                                                                     |                                                                                    |                                                                                      |
| C                     | 1.31870400 -1.29406000 0.26555000                                                   |                                                                                    |                                                                                      |
| C                     | 0.14486700 -2.15476600 -0.20994800                                                  |                                                                                    |                                                                                      |
| C                     | -1.26558000 -1.75572500 0.23965100                                                  |                                                                                    |                                                                                      |
| C                     | 1.55055400 -0.03565600 -0.57987300                                                  |                                                                                    |                                                                                      |
| C                     | -1.91381800 -0.54024400 -0.43721900                                                 |                                                                                    |                                                                                      |
| C                     | 2.68407400 0.74752100 -0.11936600                                                   |                                                                                    |                                                                                      |
| C                     | -1.51463600 0.83051800 0.01386000                                                   |                                                                                    |                                                                                      |
| H                     | 1.17228900 -1.00377400 1.31094300                                                   |                                                                                    |                                                                                      |
| H                     | 0.16896600 -2.23216800 -1.30508900                                                  |                                                                                    |                                                                                      |
| H                     | -1.27618900 -1.63129300 1.32833100                                                  |                                                                                    |                                                                                      |
| H                     | -1.76830200 -0.61826200 -1.52248600                                                 |                                                                                    |                                                                                      |
| H                     | 0.65569300 0.60099600 -0.55398700                                                   |                                                                                    |                                                                                      |
| H                     | 2.23340300 -1.89353800 0.24082000                                                   |                                                                                    |                                                                                      |
| H                     | 0.32018500 -3.17092100 0.15829500                                                   |                                                                                    |                                                                                      |
| H                     | -1.91532900 -2.61486300 0.04221800                                                  |                                                                                    |                                                                                      |
| H                     | 1.72261200 -0.30946800 -1.62620000                                                  |                                                                                    |                                                                                      |
| H                     | -3.00679600 -0.63471900 -0.29468400                                                 |                                                                                    |                                                                                      |
| N                     | 3.58142000 1.36238000 0.26362700                                                    |                                                                                    |                                                                                      |
| C                     | -1.77815900 1.95972300 -0.92418000                                                  |                                                                                    |                                                                                      |
| H                     | -2.84377200 2.24640500 -0.91982600                                                  |                                                                                    |                                                                                      |
| H                     | -1.21500700 2.85678400 -0.65007500                                                  |                                                                                    |                                                                                      |
| H                     | -1.53081200 1.69991900 -1.95806000                                                  |                                                                                    |                                                                                      |
| C                     | -1.46076900 1.14910200 1.46898100                                                   |                                                                                    |                                                                                      |
| H                     | -0.98815900 0.36125400 2.06073300                                                   |                                                                                    |                                                                                      |
| H                     | -0.91697200 2.07986000 1.65326200                                                   |                                                                                    |                                                                                      |
| H                     | -2.47317400 1.28865700 1.88567700                                                   |                                                                                    |                                                                                      |
| 43                    |  |                                                                                    |  |

| No.                   | Species                                                                             | Optimized Structure                                                                  |
|-----------------------|-------------------------------------------------------------------------------------|--------------------------------------------------------------------------------------|
| Cartesian Coordinates |                                                                                     |                                                                                      |
| C                     | 2.89429700 0.44619500 -0.00005900                                                   |                                                                                      |
| C                     | 1.78049000 1.26592500 -0.00001400                                                   |                                                                                      |
| C                     | 0.48300300 0.73989900 0.00003600                                                    |                                                                                      |
| C                     | 0.31851400 -0.64212800 0.00004500                                                   |                                                                                      |
| C                     | 1.44971300 -1.46627600 -0.00000100                                                  |                                                                                      |
| C                     | 2.72727700 -0.93651600 -0.00005300                                                  |                                                                                      |
| H                     | -0.55710900 2.36295300 0.87031200                                                   |                                                                                      |
| H                     | 3.88846600 0.87872800 -0.00010100                                                   |                                                                                      |
| H                     | 1.90764700 2.34469100 -0.00002500                                                   |                                                                                      |
| C                     | -0.67201200 1.70914600 0.00010000                                                   |                                                                                      |
| C                     | -1.03239300 -1.30519600 0.00012700                                                  |                                                                                      |
| H                     | 1.31391900 -2.54384500 0.00000000                                                   |                                                                                      |
| H                     | 3.58905800 -1.59430500 -0.00009100                                                  |                                                                                      |
| C                     | -2.24401100 -0.38794600 -0.00002600                                                 |                                                                                      |
| C                     | -2.09557300 1.13178500 -0.00007000                                                  |                                                                                      |
| H                     | -1.11854900 -1.96023500 -0.87241500                                                 |                                                                                      |
| H                     | -2.64594000 1.49429800 0.87025400                                                   |                                                                                      |
| H                     | -1.11857200 -1.95996900 0.87286900                                                  |                                                                                      |
| H                     | -2.64570600 1.49422300 -0.87057400                                                  |                                                                                      |
| H                     | -0.55700800 2.36317400 -0.86993100                                                  |                                                                                      |
| N                     | -3.38743300 -0.88700600 -0.00011600                                                 |                                                                                      |
| 44                    | 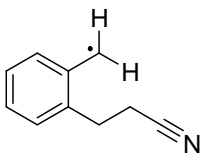 |  |
| Cartesian Coordinates |                                                                                     |                                                                                      |
| C                     | 2.42470800 -1.07481900 -0.50568800                                                  |                                                                                      |
| C                     | 1.19045000 -1.42830400 0.02933800                                                   |                                                                                      |
| C                     | 0.28409800 -0.47866100 0.48247300                                                   |                                                                                      |
| C                     | 0.62890900 0.90423800 0.40611200                                                    |                                                                                      |
| C                     | 1.89794100 1.23629300 -0.13694300                                                   |                                                                                      |
| C                     | 2.77419100 0.27258300 -0.58606400                                                   |                                                                                      |
| H                     | -0.88074300 -1.90735400 1.53986800                                                  |                                                                                      |
| H                     | 3.10874000 -1.84214300 -0.84884100                                                  |                                                                                      |
| H                     | 0.92779300 -2.48006200 0.10401300                                                   |                                                                                      |
| C                     | -1.03468600 -0.94973000 1.03486000                                                  |                                                                                      |
| C                     | -0.21925000 1.93700300 0.84101200                                                   |                                                                                      |
| H                     | 2.16928400 2.28499800 -0.19656000                                                   |                                                                                      |
| H                     | 3.73412700 0.56318600 -0.99802400                                                   |                                                                                      |
| C                     | -2.11765700 -1.18764200 -0.03826000                                                 |                                                                                      |
| H                     | -2.97649600 -1.69703200 0.41063000                                                  |                                                                                      |

| No.                   | Species                                                                             | Optimized Structure                                                                  |
|-----------------------|-------------------------------------------------------------------------------------|--------------------------------------------------------------------------------------|
| H                     | -1.41896600 -0.26106500 1.78978200                                                  |                                                                                      |
| H                     | -1.72642100 -1.84605700 -0.81953200                                                 |                                                                                      |
| C                     | -2.60948700 0.02670900 -0.67045600                                                  |                                                                                      |
| N                     | -3.01994400 0.98745600 -1.15741900                                                  |                                                                                      |
| H                     | -1.21145900 1.75938900 1.22855300                                                   |                                                                                      |
| H                     | 0.09844300 2.96793500 0.75373800                                                    |                                                                                      |
| 45                    | 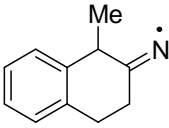   |    |
| Cartesian Coordinates |                                                                                     |                                                                                      |
| C                     | 3.02764800 0.35260100 -0.06446600                                                   |                                                                                      |
| C                     | 1.99660000 1.21924900 0.27495200                                                    |                                                                                      |
| C                     | 0.67062800 0.79456900 0.25530000                                                    |                                                                                      |
| C                     | 0.37654800 -0.52198200 -0.11960900                                                  |                                                                                      |
| C                     | 1.41456600 -1.38036300 -0.47537600                                                  |                                                                                      |
| C                     | 2.73509500 -0.95136800 -0.44506900                                                  |                                                                                      |
| H                     | -0.84122600 1.54334800 1.58953900                                                   |                                                                                      |
| H                     | 4.05524200 0.69776800 -0.04365100                                                   |                                                                                      |
| H                     | 2.22087900 2.24405000 0.55478800                                                    |                                                                                      |
| C                     | -0.46995000 1.72131500 0.57302600                                                   |                                                                                      |
| C                     | -1.04722200 -1.02010200 -0.07611600                                                 |                                                                                      |
| H                     | 1.18305700 -2.39724600 -0.77804700                                                  |                                                                                      |
| H                     | 3.53236900 -1.63094500 -0.72440200                                                  |                                                                                      |
| C                     | -2.05858700 0.06687500 -0.47714000                                                  |                                                                                      |
| C                     | -1.60409400 1.51744500 -0.43055700                                                  |                                                                                      |
| H                     | -1.16109000 -1.84070100 -0.78939500                                                 |                                                                                      |
| H                     | -2.46419200 2.15452300 -0.21917400                                                  |                                                                                      |
| H                     | -1.24265200 1.77480500 -1.43245500                                                  |                                                                                      |
| H                     | -0.13082900 2.75996600 0.54412000                                                   |                                                                                      |
| N                     | -3.21497700 -0.24397700 -0.81842000                                                 |                                                                                      |
| C                     | -1.40408500 -1.55378200 1.32144800                                                  |                                                                                      |
| H                     | -2.42638600 -1.93597000 1.33033000                                                  |                                                                                      |
| H                     | -0.71948000 -2.35831300 1.59993100                                                  |                                                                                      |
| H                     | -1.32373200 -0.77018500 2.07898500                                                  |                                                                                      |
| 46                    |  |  |
| Cartesian Coordinates |                                                                                     |                                                                                      |

| No.                   | Species                                                                             | Optimized Structure                                                                  |  |  |
|-----------------------|-------------------------------------------------------------------------------------|--------------------------------------------------------------------------------------|--|--|
| C                     | 2.41673100 -1.48514200 -0.40608300                                                  |                                                                                      |  |  |
| C                     | 1.17982200 -1.76644300 0.16485700                                                   |                                                                                      |  |  |
| C                     | 0.27669900 -0.76623200 0.50000800                                                   |                                                                                      |  |  |
| C                     | 0.62403900 0.59852600 0.26354700                                                    |                                                                                      |  |  |
| C                     | 1.89315500 0.85675600 -0.31457800                                                   |                                                                                      |  |  |
| C                     | 2.76685800 -0.15883900 -0.64519600                                                  |                                                                                      |  |  |
| H                     | -0.89421900 -2.08547700 1.68389800                                                  |                                                                                      |  |  |
| H                     | 3.09883100 -2.28986900 -0.65418600                                                  |                                                                                      |  |  |
| H                     | 0.91110500 -2.80052500 0.36334500                                                   |                                                                                      |  |  |
| C                     | -1.04446000 -1.17573200 1.09628700                                                  |                                                                                      |  |  |
| C                     | -0.24386200 1.66836100 0.58437000                                                   |                                                                                      |  |  |
| H                     | 2.18003100 1.88392800 -0.50552000                                                   |                                                                                      |  |  |
| H                     | 3.72736000 0.07962000 -1.08866700                                                   |                                                                                      |  |  |
| C                     | -2.13289300 -1.50546900 0.05306200                                                  |                                                                                      |  |  |
| H                     | -2.99345900 -1.96476900 0.55026100                                                  |                                                                                      |  |  |
| H                     | -1.42339600 -0.42250300 1.78989200                                                  |                                                                                      |  |  |
| C                     | 0.07120600 3.10005300 0.33687600                                                    |                                                                                      |  |  |
| H                     | -0.71869600 3.74674500 0.71956000                                                   |                                                                                      |  |  |
| H                     | 1.01284000 3.40580300 0.80944100                                                    |                                                                                      |  |  |
| H                     | 0.17583500 3.31172600 -0.73560200                                                   |                                                                                      |  |  |
| H                     | -1.74763000 -2.23749400 -0.66299900                                                 |                                                                                      |  |  |
| C                     | -2.62144100 -0.35574500 -0.69250900                                                 |                                                                                      |  |  |
| N                     | -3.03175000 0.55253000 -1.27176400                                                  |                                                                                      |  |  |
| H                     | -1.22148300 1.44453800 0.98907400                                                   |                                                                                      |  |  |
| 47                    | 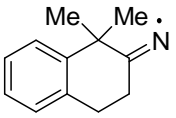 |  |  |  |
| Cartesian Coordinates |                                                                                     |                                                                                      |  |  |
| C                     | 3.18616800 0.19967900 0.08826000                                                    |                                                                                      |  |  |
| C                     | 2.24989000 1.21928500 0.12229500                                                    |                                                                                      |  |  |
| C                     | 0.87873500 0.95508100 0.08276300                                                    |                                                                                      |  |  |
| C                     | 0.43750700 -0.37305600 0.00554700                                                   |                                                                                      |  |  |
| C                     | 1.39515300 -1.39160000 -0.03695600                                                  |                                                                                      |  |  |
| C                     | 2.75278200 -1.11830300 0.00497100                                                   |                                                                                      |  |  |
| H                     | -0.27963600 2.39389800 1.16839400                                                   |                                                                                      |  |  |
| H                     | 4.24518500 0.42973200 0.11929700                                                    |                                                                                      |  |  |
| H                     | 2.58066500 2.25210300 0.17766300                                                    |                                                                                      |  |  |
| C                     | -0.09155900 2.10681800 0.12660100                                                   |                                                                                      |  |  |
| C                     | -1.04276600 -0.76069000 -0.04434100                                                 |                                                                                      |  |  |
| H                     | 1.07157500 -2.42456300 -0.10510700                                                  |                                                                                      |  |  |
| H                     | 3.46947800 -1.93114200 -0.02957100                                                  |                                                                                      |  |  |

| No.                   | Species                                                                           | Optimized Structure                                                                |  |
|-----------------------|-----------------------------------------------------------------------------------|------------------------------------------------------------------------------------|--|
| C                     | -1.93444600 0.48242200 0.09358900                                                 |                                                                                    |  |
| C                     | -1.41711800 1.75608800 -0.53708500                                                |                                                                                    |  |
| H                     | -2.15518000 2.54962600 -0.41618700                                                |                                                                                    |  |
| H                     | -1.26676400 1.58683700 -1.60882000                                                |                                                                                    |  |
| H                     | 0.35294600 2.98022800 -0.35957400                                                 |                                                                                    |  |
| N                     | -3.02334000 0.46373300 0.69843300                                                 |                                                                                    |  |
| C                     | -1.38830800 -1.75564700 1.07070300                                                |                                                                                    |  |
| H                     | -2.45558900 -1.98470800 1.05119300                                                |                                                                                    |  |
| H                     | -0.83415500 -2.68805100 0.94679100                                                |                                                                                    |  |
| H                     | -1.14908900 -1.34079900 2.05156100                                                |                                                                                    |  |
| C                     | -1.37046100 -1.38887000 -1.41349100                                               |                                                                                    |  |
| H                     | -1.16016600 -0.70009100 -2.23481800                                               |                                                                                    |  |
| H                     | -0.76454700 -2.28452200 -1.57090200                                               |                                                                                    |  |
| H                     | -2.42480100 -1.67192000 -1.45609100                                               |                                                                                    |  |
| 48                    | 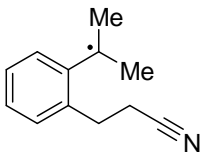 |  |  |
| Cartesian Coordinates |                                                                                   |                                                                                    |  |
| C                     | -3.00212100 -0.61473300 0.22392800                                                |                                                                                    |  |
| C                     | -1.92918600 -1.30363200 -0.32388600                                               |                                                                                    |  |
| C                     | -0.68242100 -0.71271900 -0.52312700                                               |                                                                                    |  |
| C                     | -0.50024700 0.65882300 -0.18477300                                                |                                                                                    |  |
| C                     | -1.59832700 1.32177500 0.41412000                                                 |                                                                                    |  |
| C                     | -2.82080300 0.70919000 0.60916800                                                 |                                                                                    |  |
| H                     | 0.00913100 -2.47964900 -1.48319800                                                |                                                                                    |  |
| H                     | -3.95846400 -1.10663500 0.35786500                                                |                                                                                    |  |
| H                     | -2.05384900 -2.34922800 -0.59258100                                               |                                                                                    |  |
| C                     | 0.43848500 -1.63274100 -0.94127900                                                |                                                                                    |  |
| C                     | 0.70489300 1.41390300 -0.41682100                                                 |                                                                                    |  |
| H                     | -1.48626500 2.36430100 0.68704400                                                 |                                                                                    |  |
| H                     | -3.63870000 1.26956600 1.04871900                                                 |                                                                                    |  |
| C                     | 1.20988700 -2.22478200 0.25866700                                                 |                                                                                    |  |
| H                     | 1.86107500 -3.03544200 -0.08447900                                                |                                                                                    |  |
| H                     | 1.15127800 -1.16284400 -1.61518400                                                |                                                                                    |  |
| C                     | 1.07759200 2.55100700 0.47473000                                                  |                                                                                    |  |
| H                     | 2.15447900 2.52028400 0.67417000                                                  |                                                                                    |  |
| H                     | 0.87399400 3.52628100 0.00780600                                                  |                                                                                    |  |
| H                     | 0.56603800 2.51941000 1.43694400                                                  |                                                                                    |  |
| C                     | 1.60410500 1.20910100 -1.59103300                                                 |                                                                                    |  |
| H                     | 1.10820500 0.70771800 -2.42397800                                                 |                                                                                    |  |
| H                     | 1.95172700 2.18252500 -1.95522400                                                 |                                                                                    |  |

| No. | Species                           | Optimized Structure |
|-----|-----------------------------------|---------------------|
| H   | 2.51133200 0.64452600 -1.33140900 |                     |
| H   | 0.50693800 -2.65703200 0.97693400 |                     |
| C   | 2.04673800 -1.26333000 0.96046000 |                     |
| N   | 2.73593100 -0.51642300 1.50509300 |                     |

## 8 NMR Spectra

S3  $^1\text{H}$  NMR (500 MHz,  $\text{CDCl}_3$ )

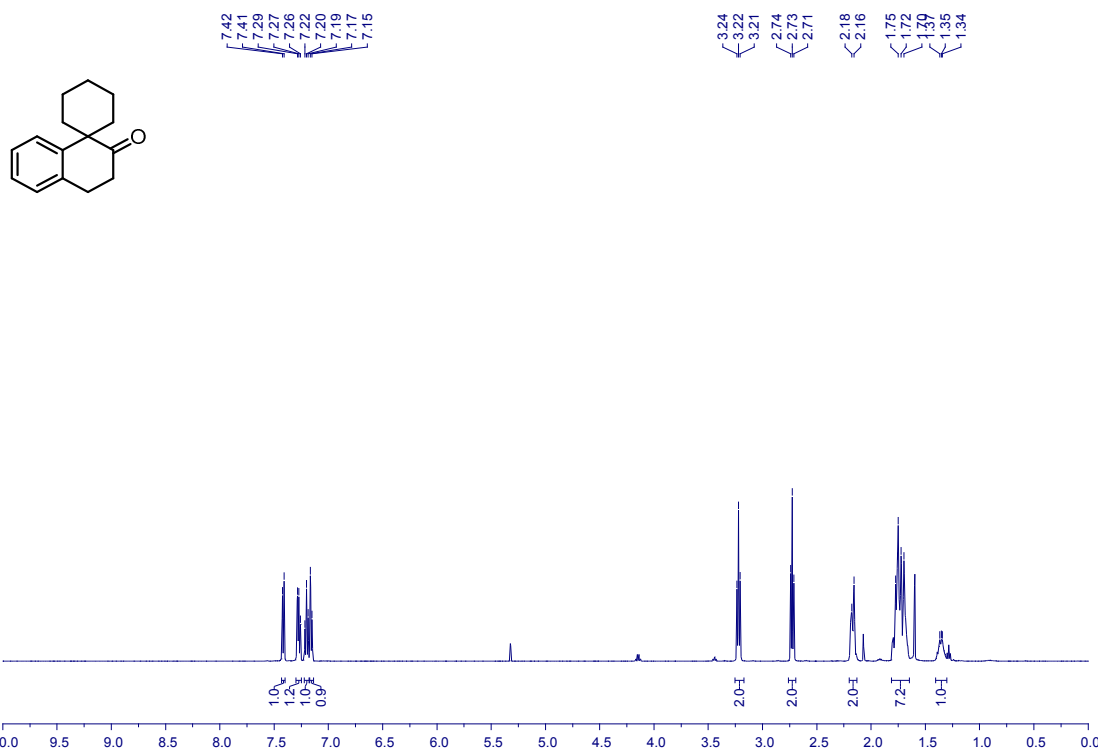

S3  $^{13}\text{C}$  NMR (126 MHz,  $\text{CDCl}_3$ )

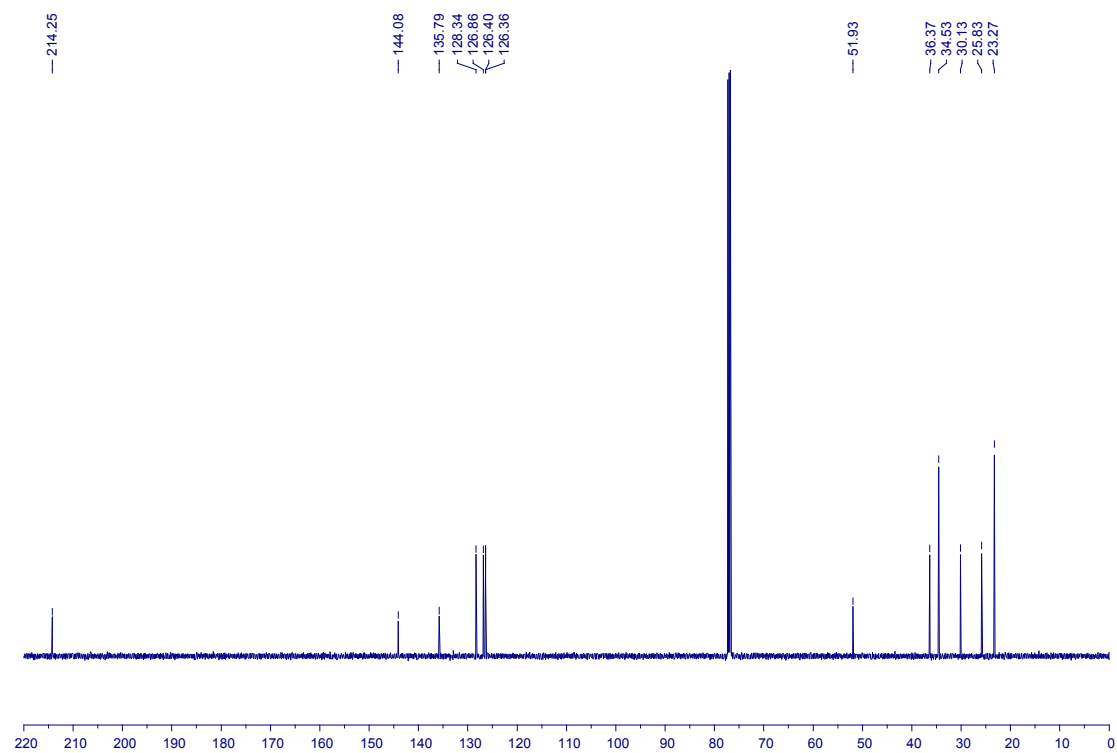



S4  $^1\text{H}$  NMR (400 MHz,  $\text{CDCl}_3$ )

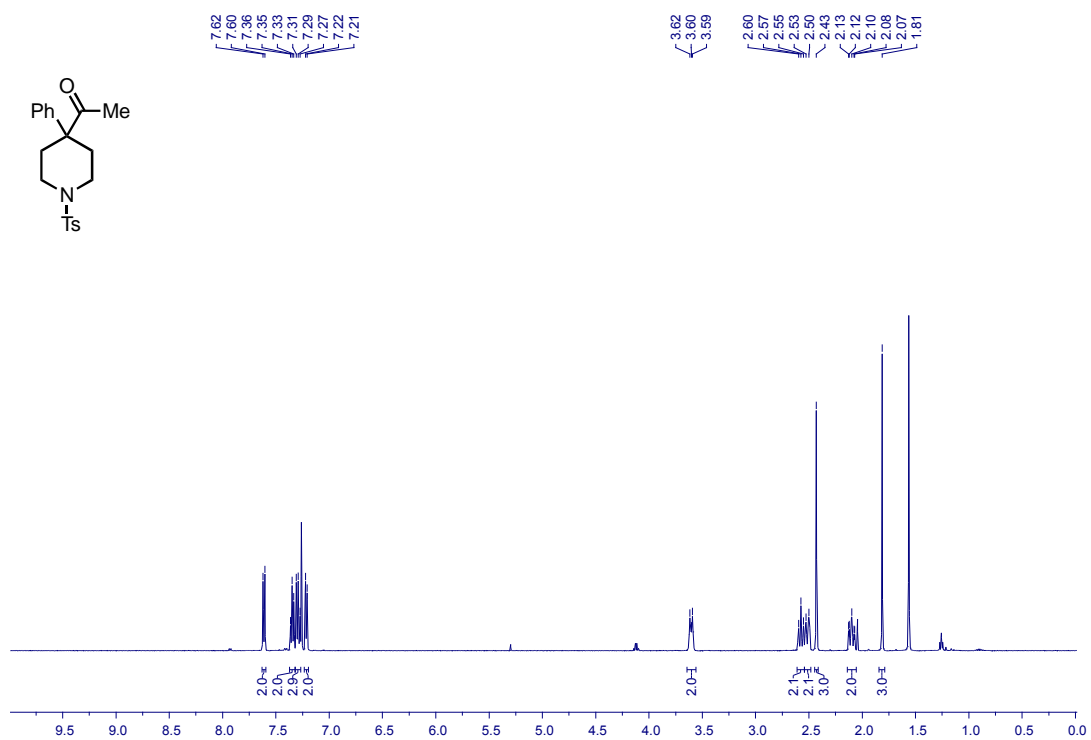

S4  $^{13}\text{C}$  NMR (126 MHz,  $\text{CDCl}_3$ )

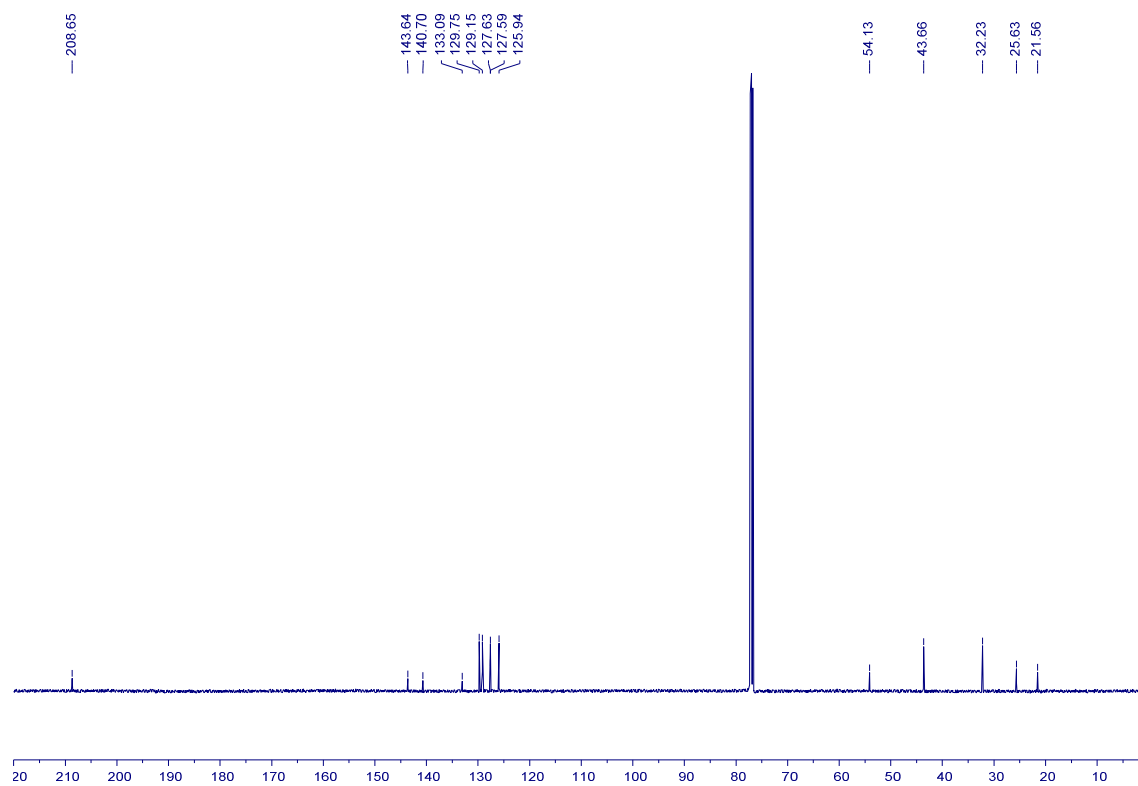

S5 <sup>1</sup>H NMR (400 MHz, CDCl<sub>3</sub>)

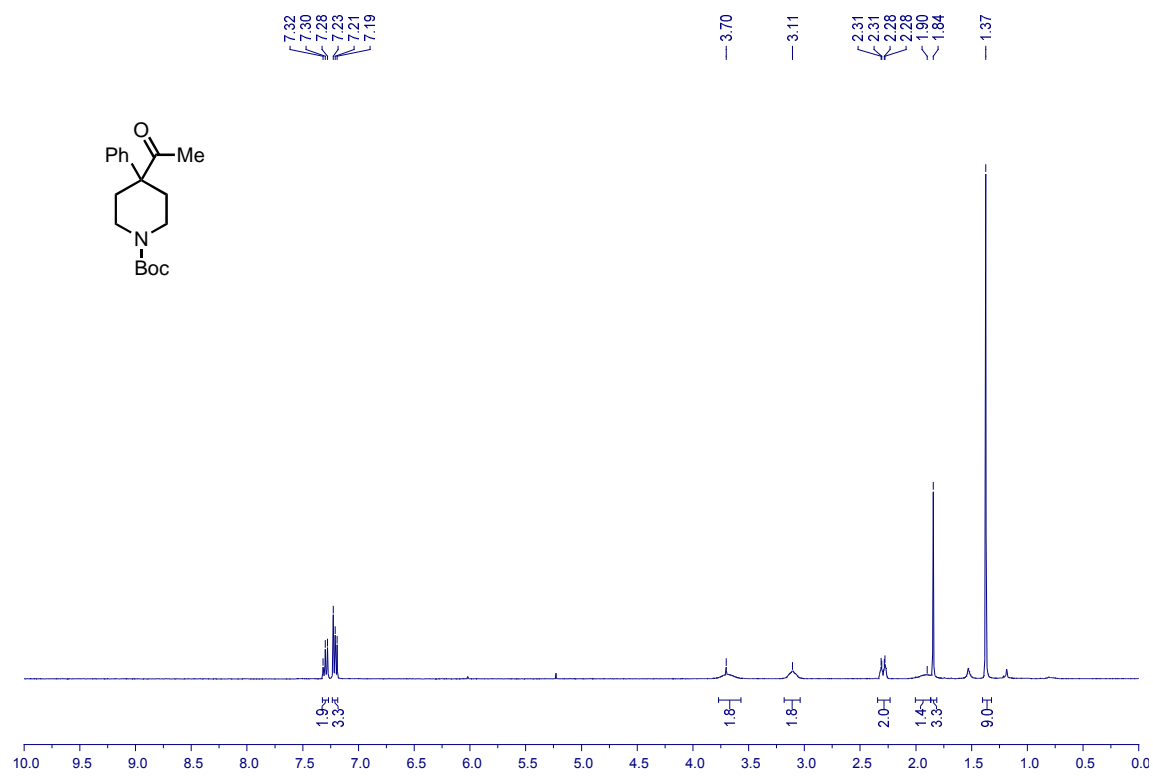

S5 <sup>13</sup>C NMR (101 MHz, CDCl<sub>3</sub>)

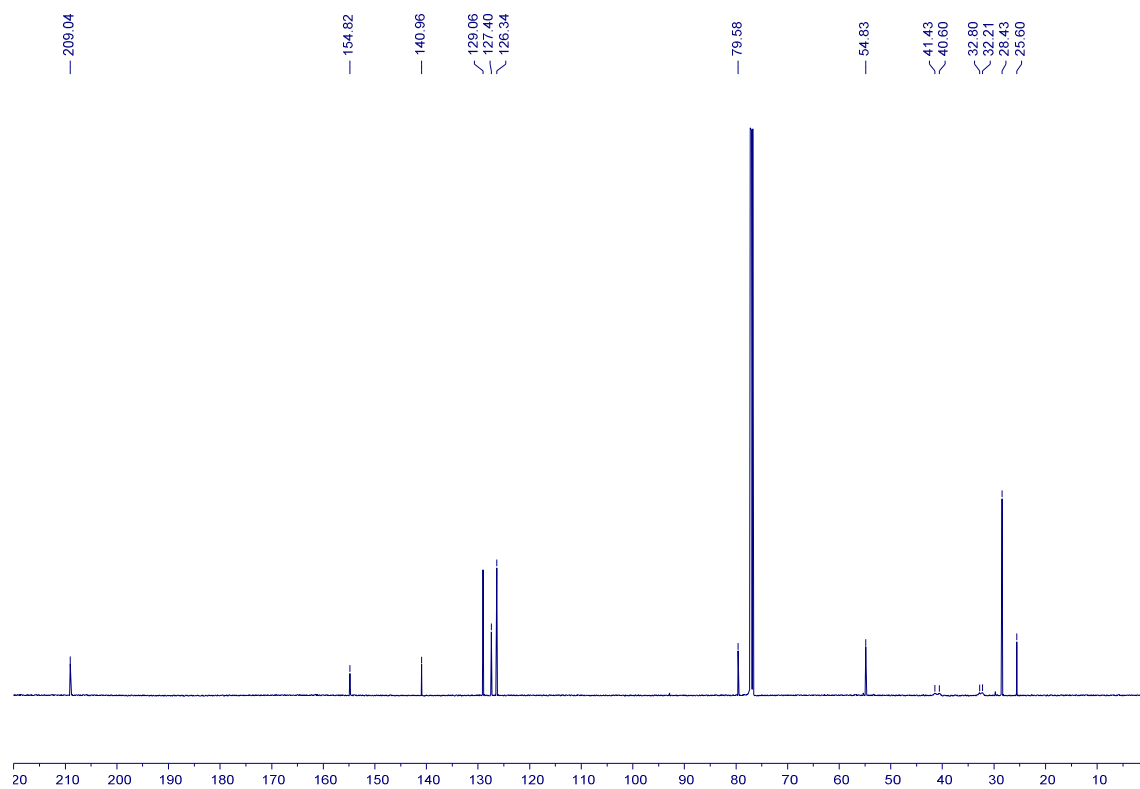

S7  $^1\text{H}$  NMR (500 MHz,  $\text{CDCl}_3$ )

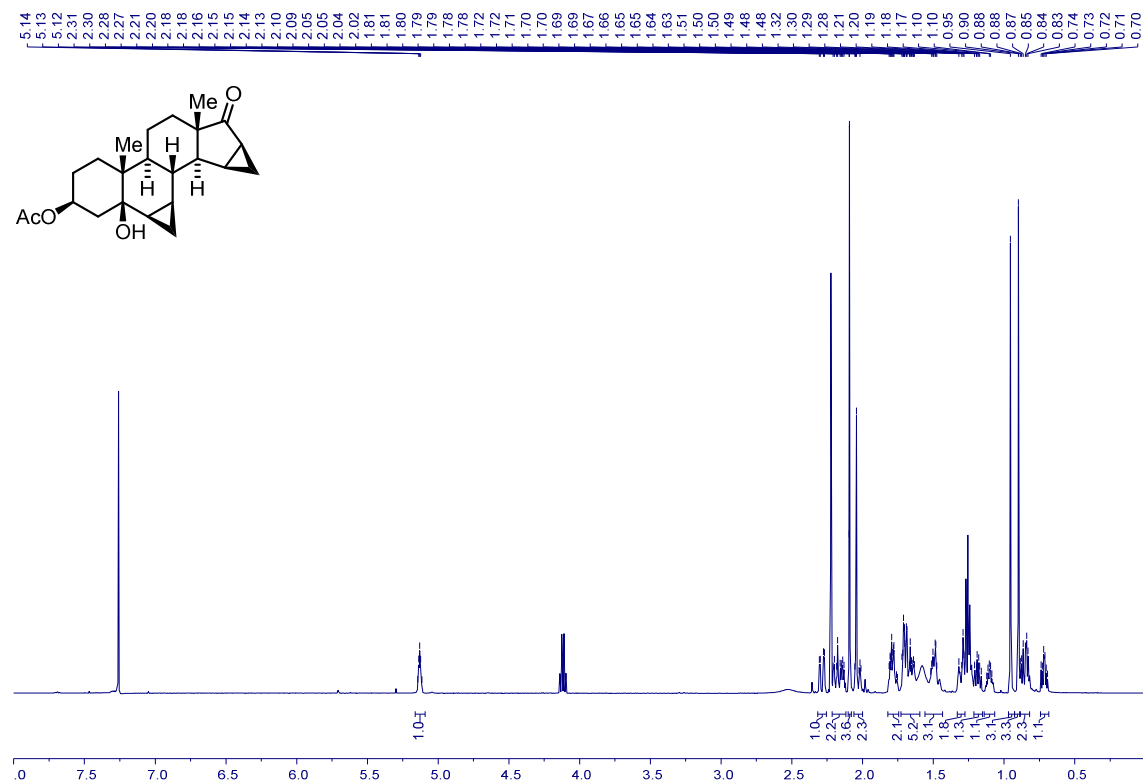

S7  $^{13}\text{C}$  NMR (126 MHz,  $\text{CDCl}_3$ )

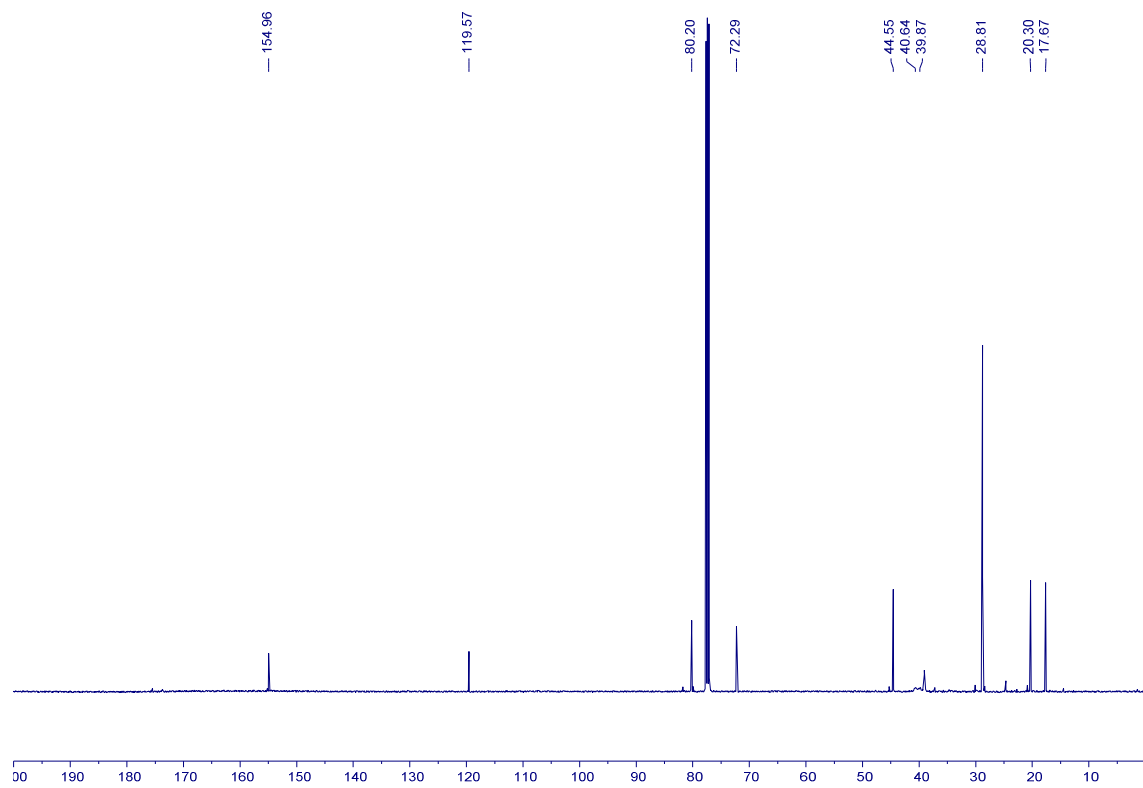

S12  $^1\text{H}$  NMR (400 MHz,  $\text{CDCl}_3$ )

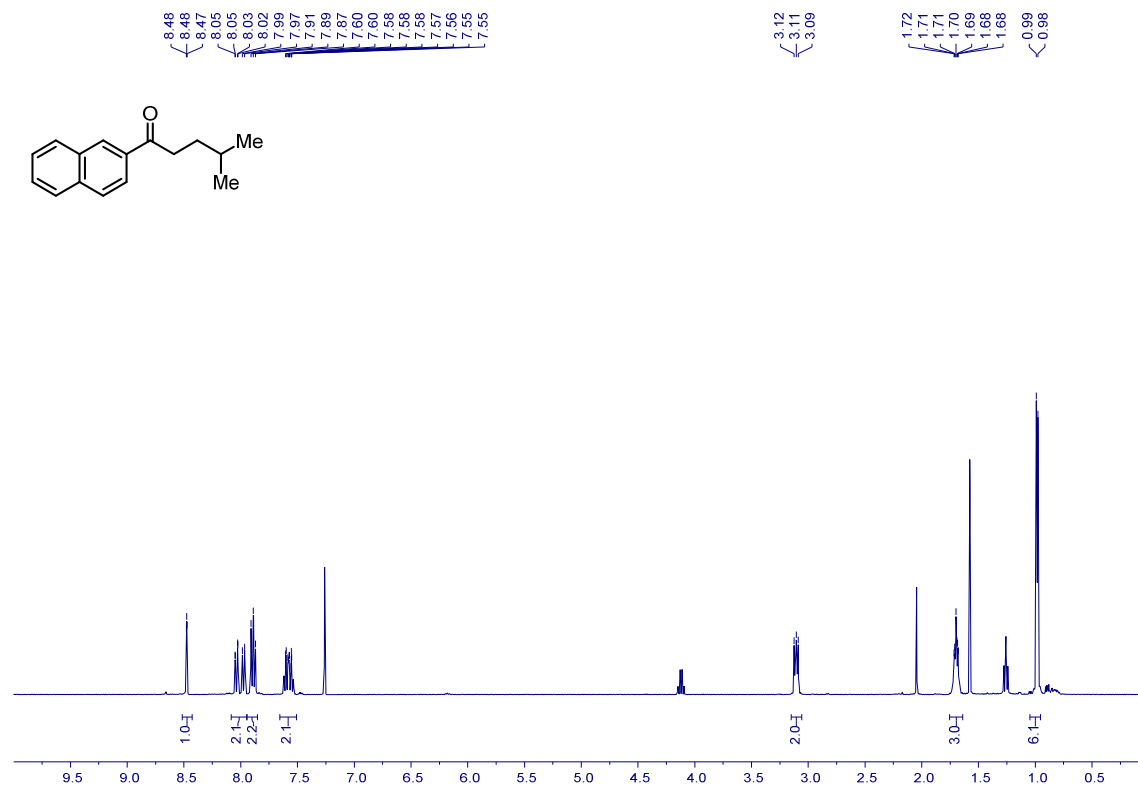

S12  $^{13}\text{C}$  NMR (101 MHz,  $\text{CDCl}_3$ )

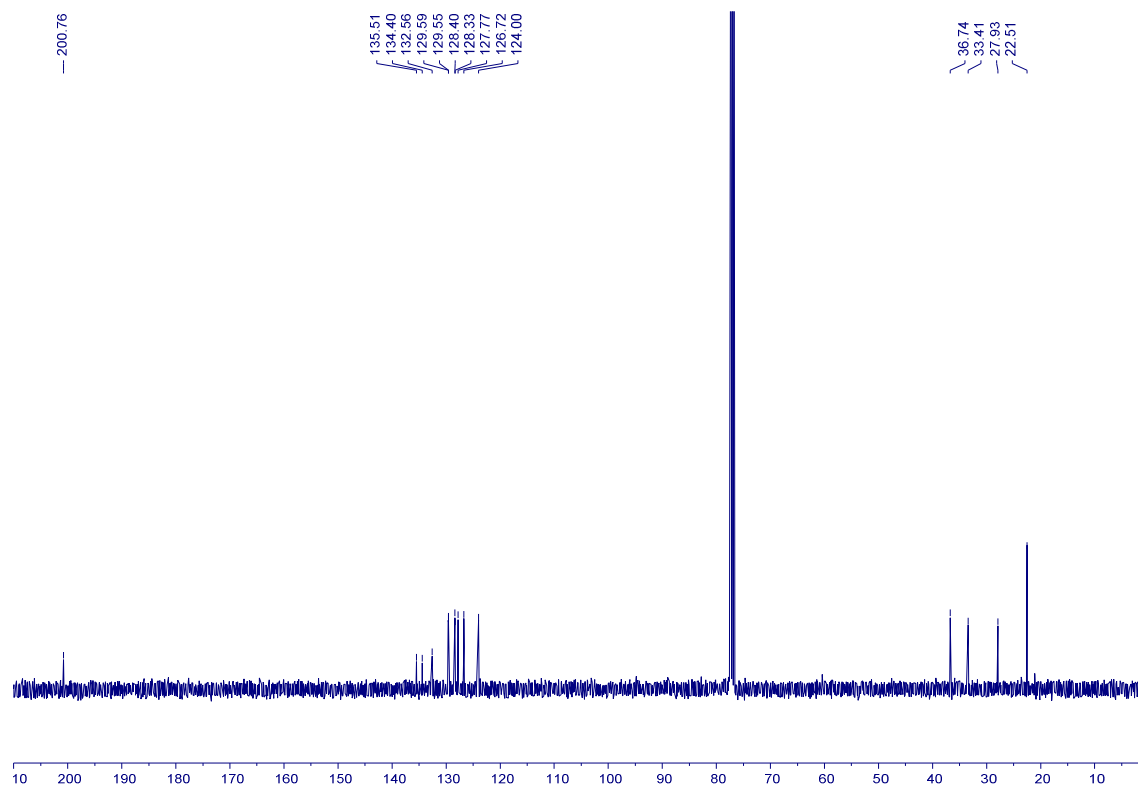

**S14**  $^1\text{H}$  NMR (500 MHz,  $\text{CDCl}_3$ )

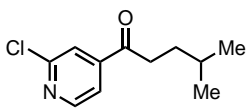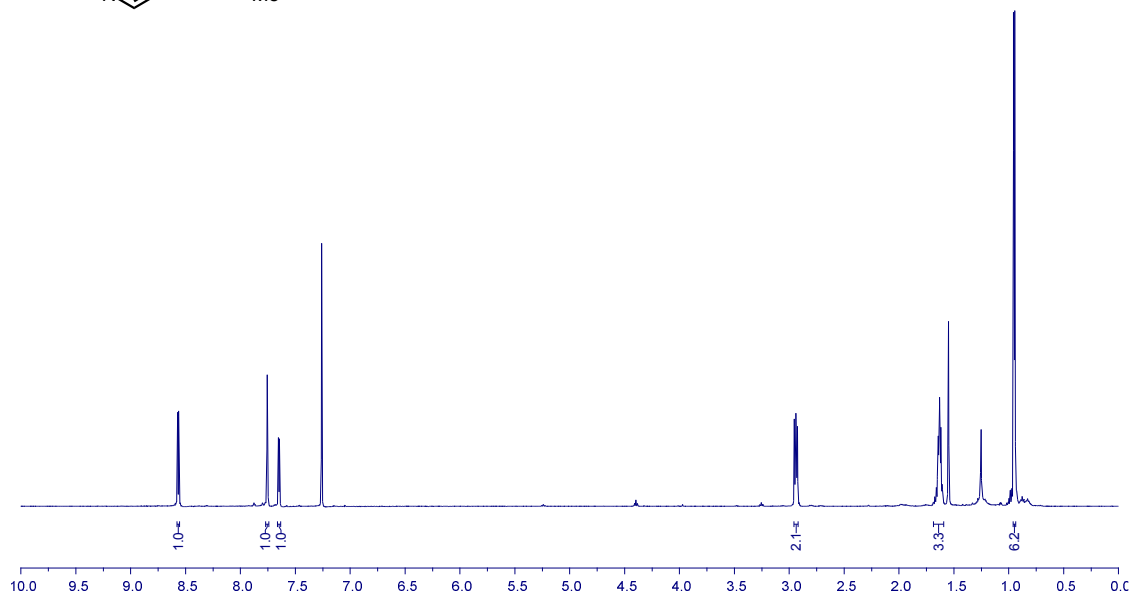

**S14**  $^{13}\text{C}$  NMR (101 MHz,  $\text{CDCl}_3$ )

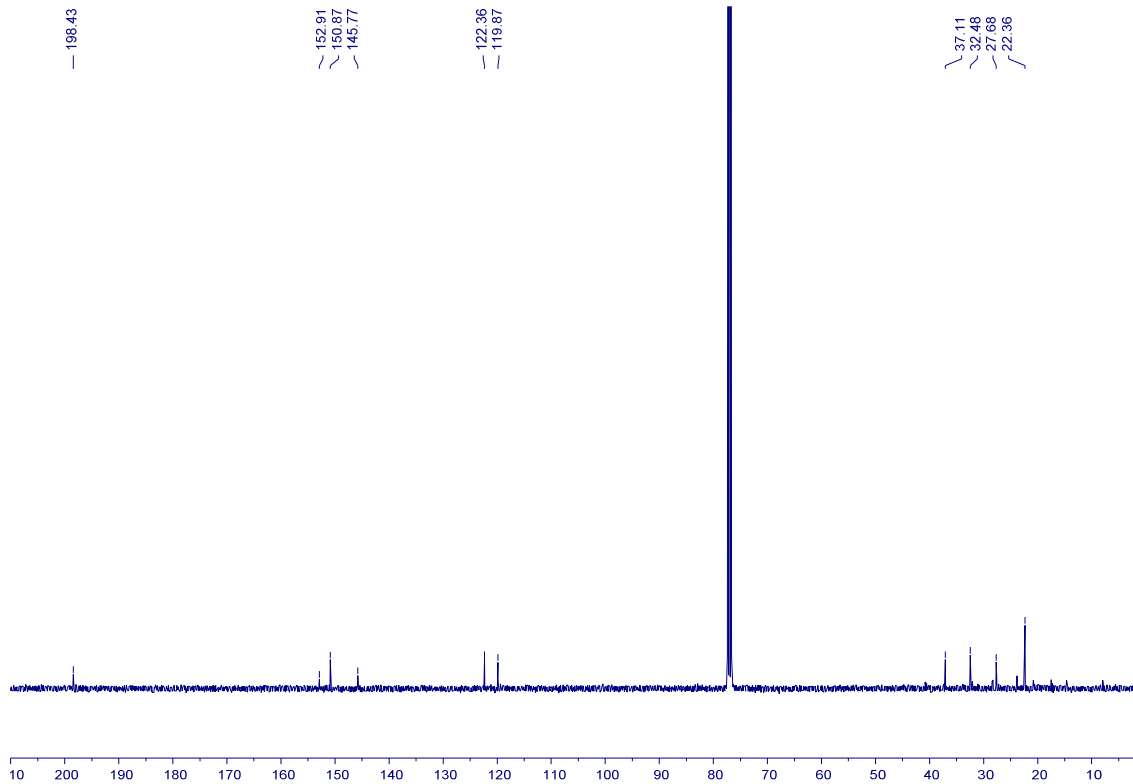

S15  $^1\text{H}$  NMR (500 MHz,  $\text{CDCl}_3$ )

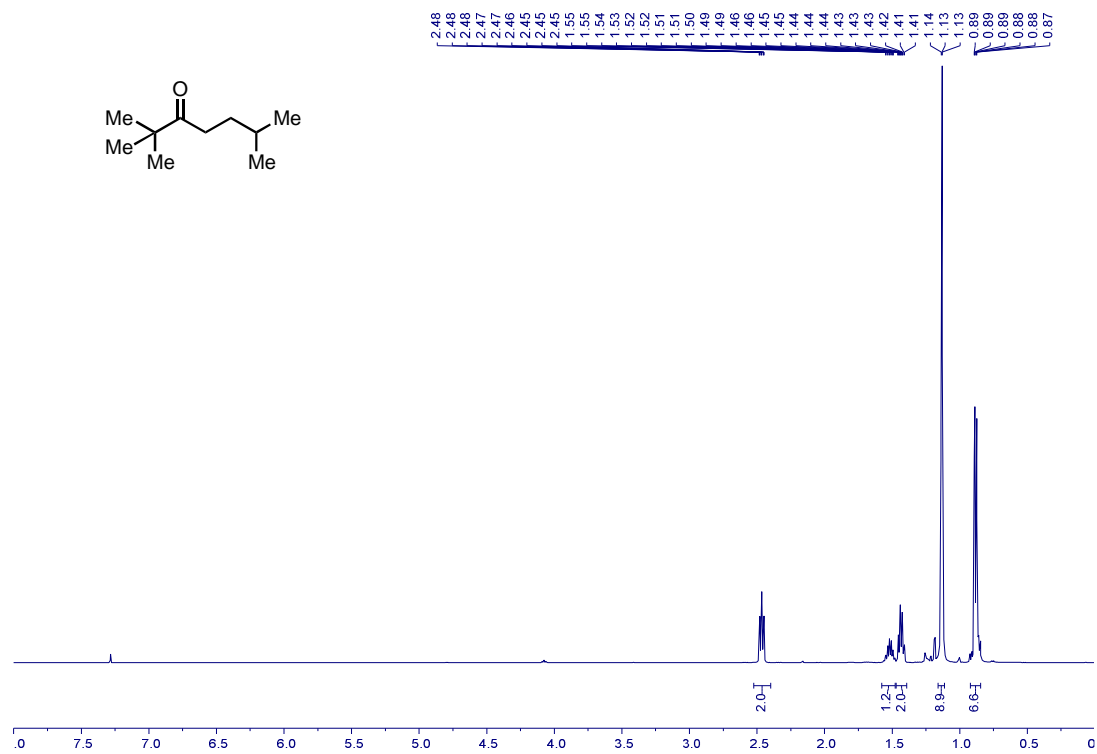

S15  $^{13}\text{C}$  NMR (126 MHz,  $\text{CDCl}_3$ )

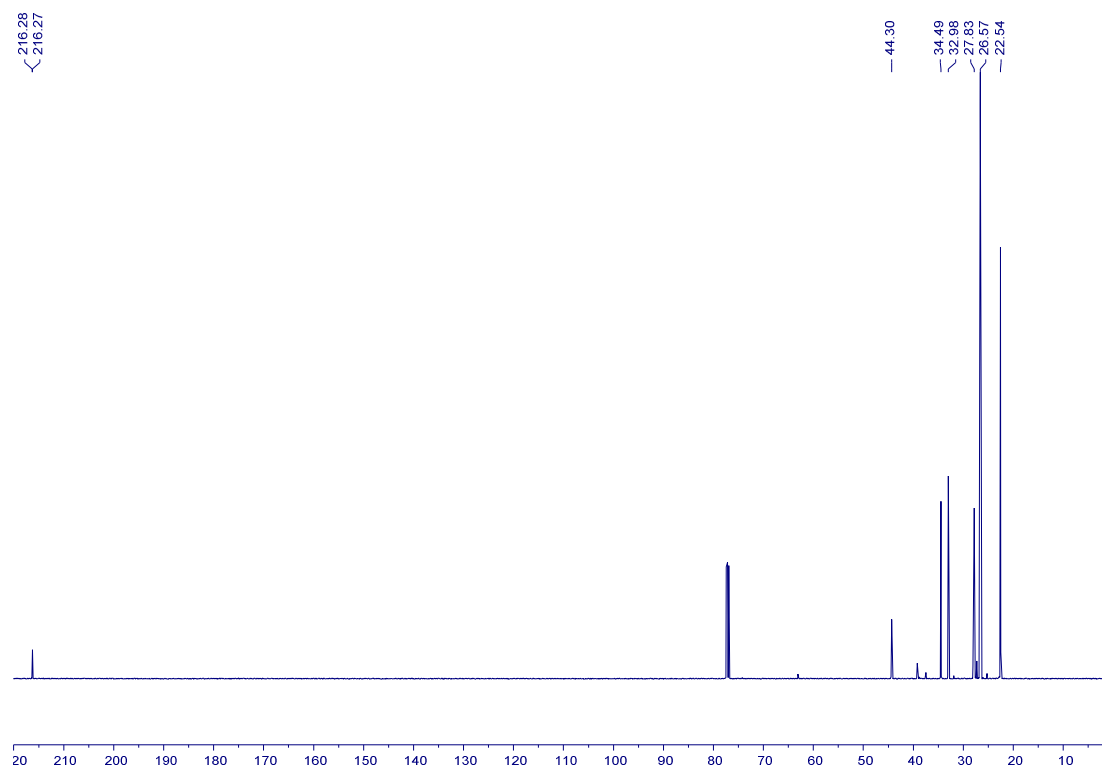

**S16**  $^1\text{H}$  NMR (400 MHz,  $\text{CDCl}_3$ )

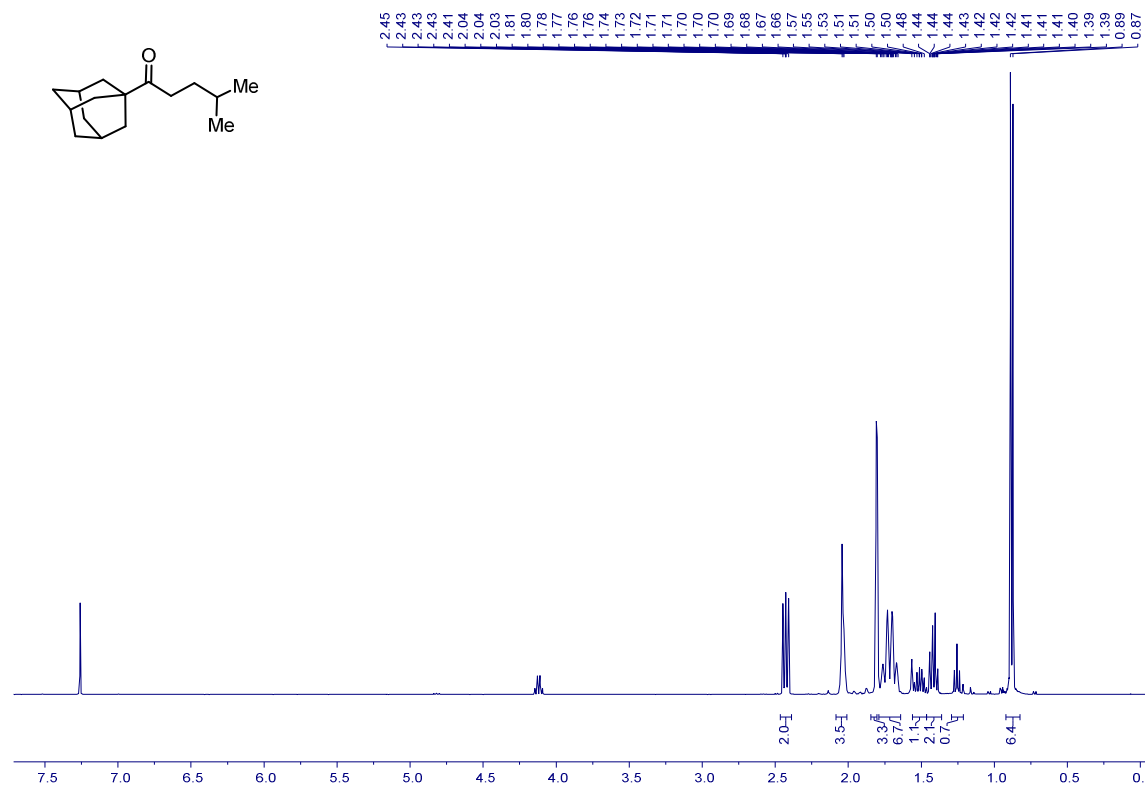

**S16**  $^{13}\text{C}$  NMR (101 MHz,  $\text{CDCl}_3$ )

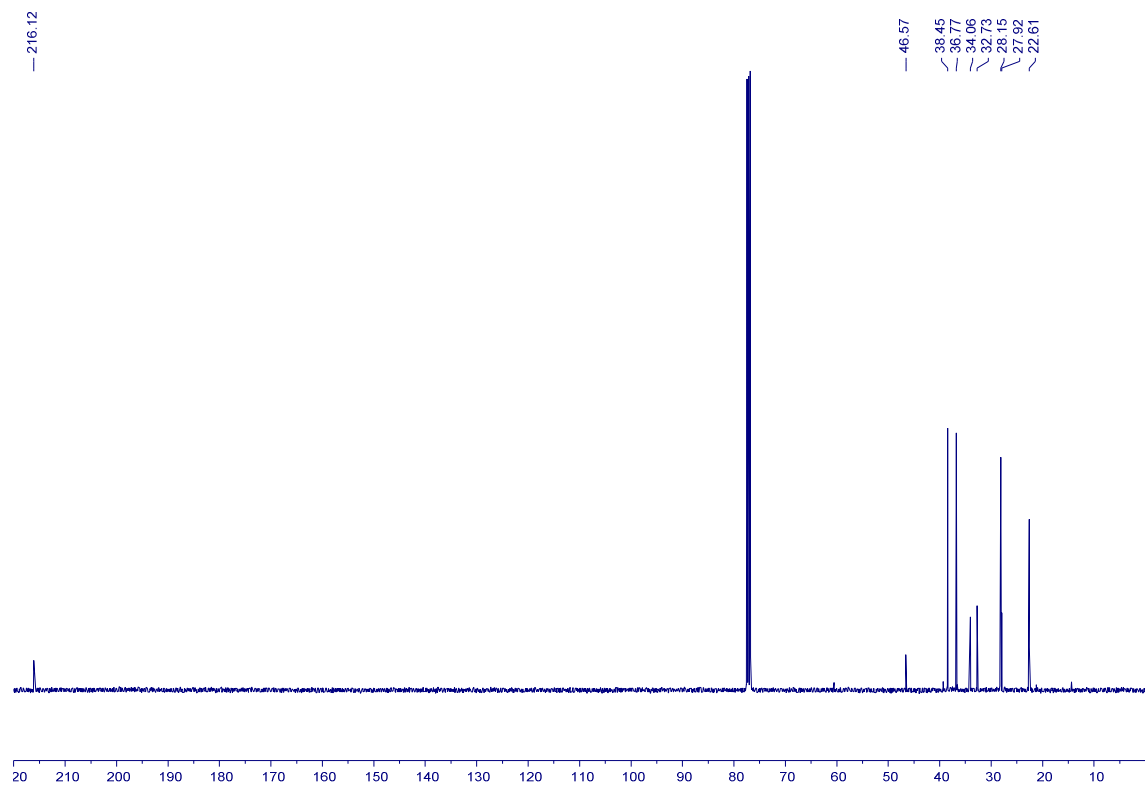

**S18**  $^1\text{H}$  NMR (400 MHz,  $\text{CDCl}_3$ )

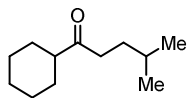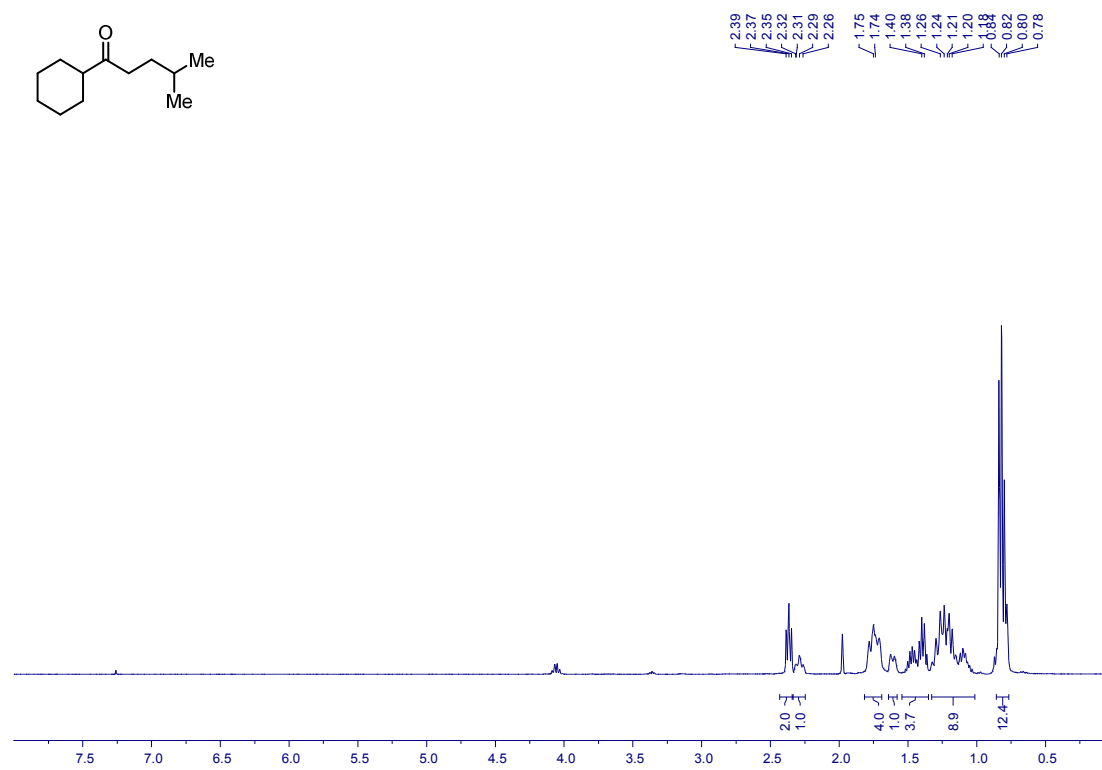

**S18**  $^{13}\text{C}$  NMR (101 MHz,  $\text{CDCl}_3$ )

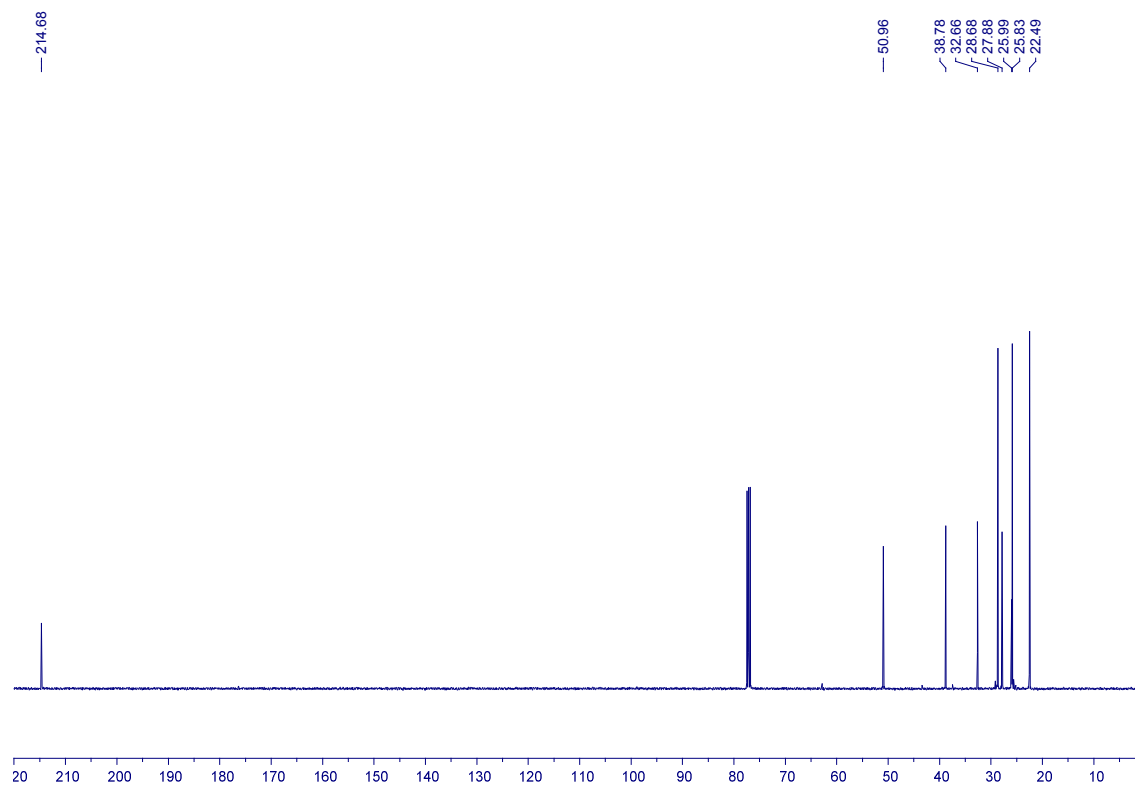



**S19**  $^1\text{H}$  NMR (400 MHz,  $\text{CDCl}_3$ )

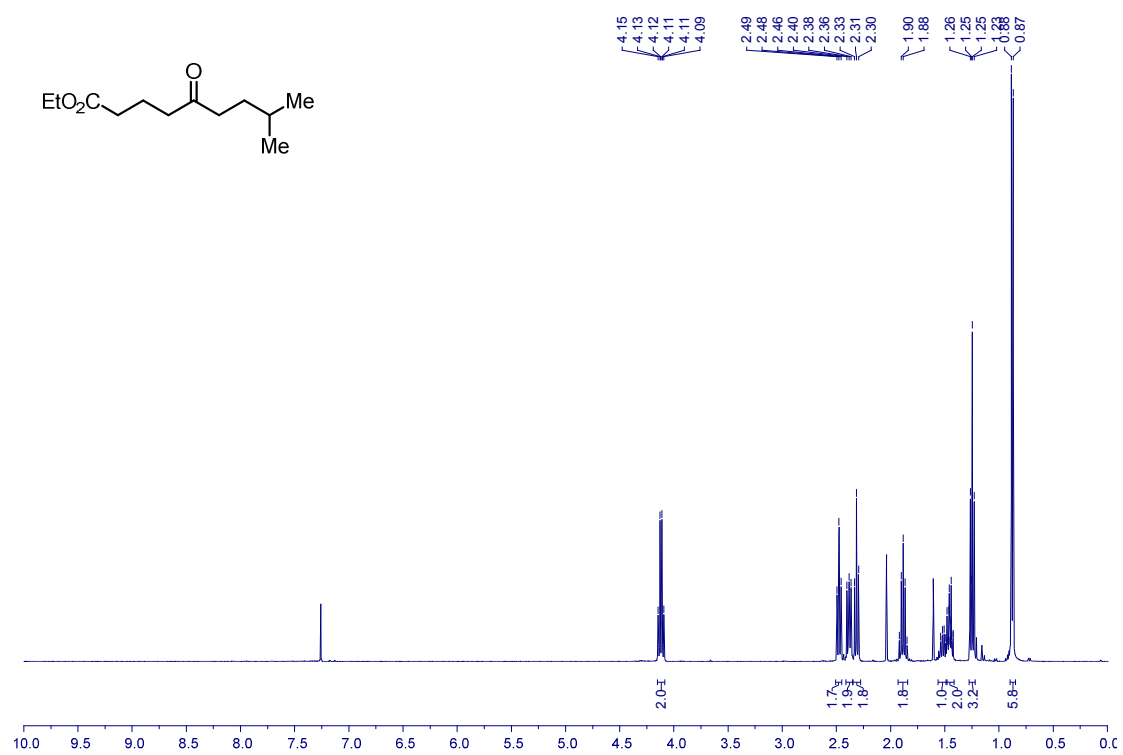

**S19**  $^{13}\text{C}$  NMR (101 MHz,  $\text{CDCl}_3$ )

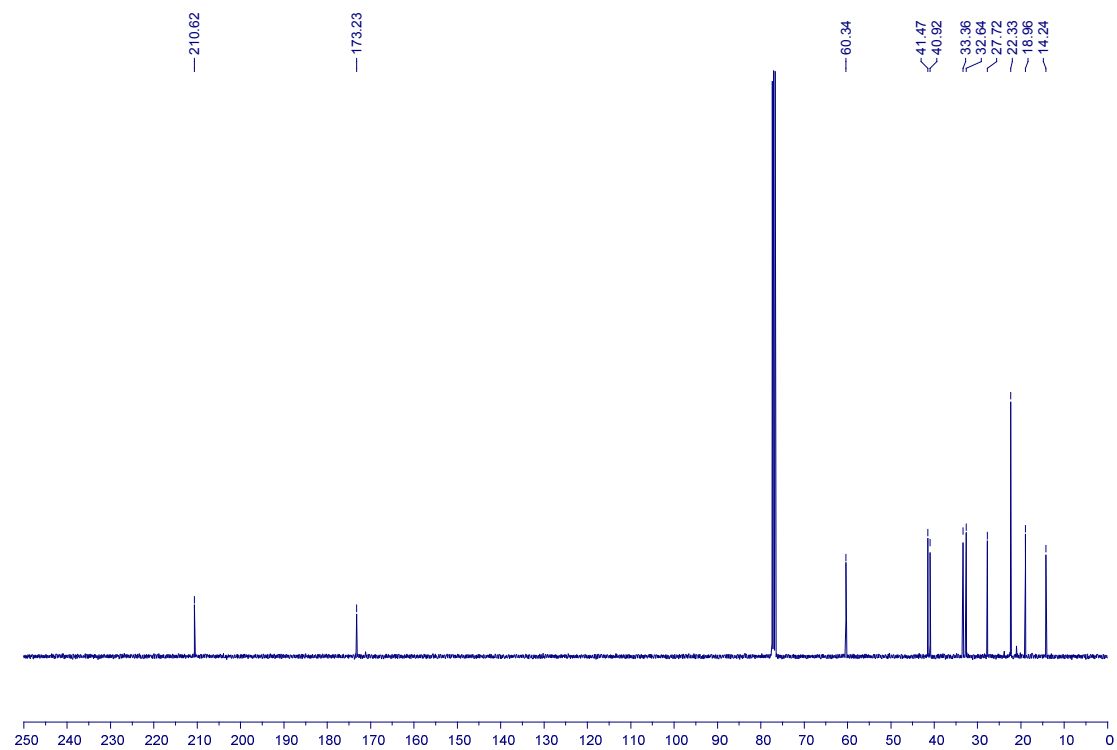

S20  $^1\text{H}$  NMR (500 MHz,  $\text{CDCl}_3$ )

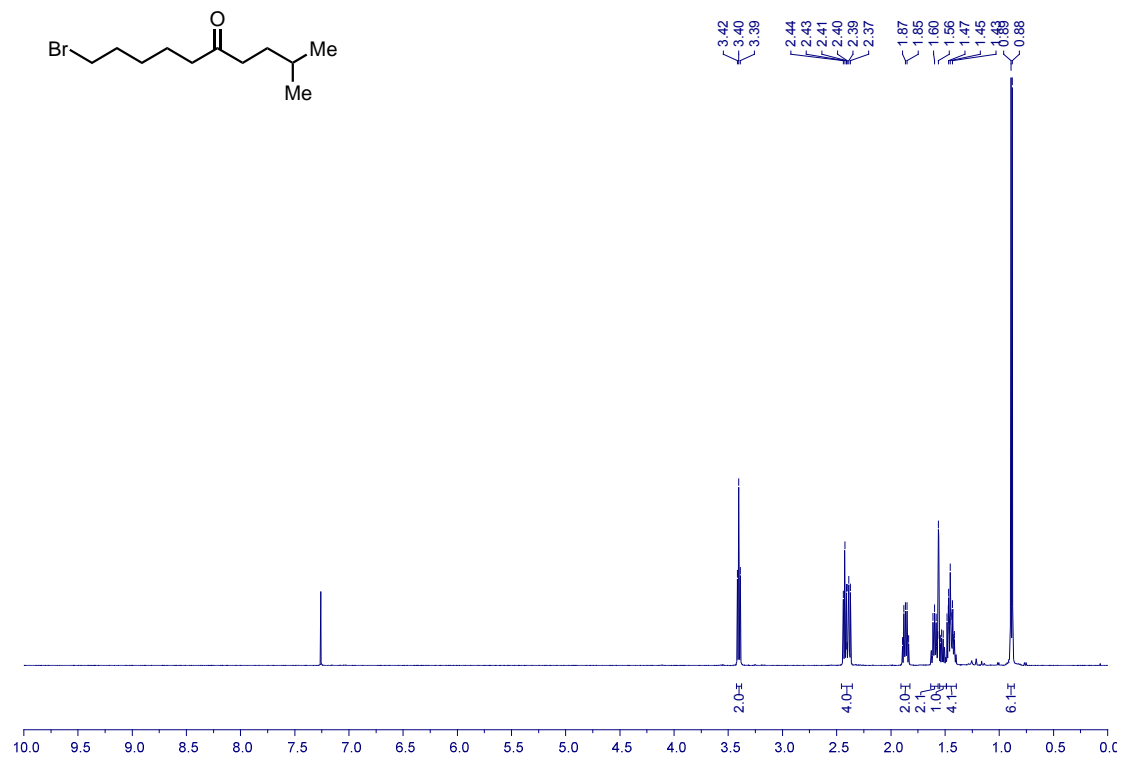

S20  $^{13}\text{C}$  NMR (126 MHz,  $\text{CDCl}_3$ )

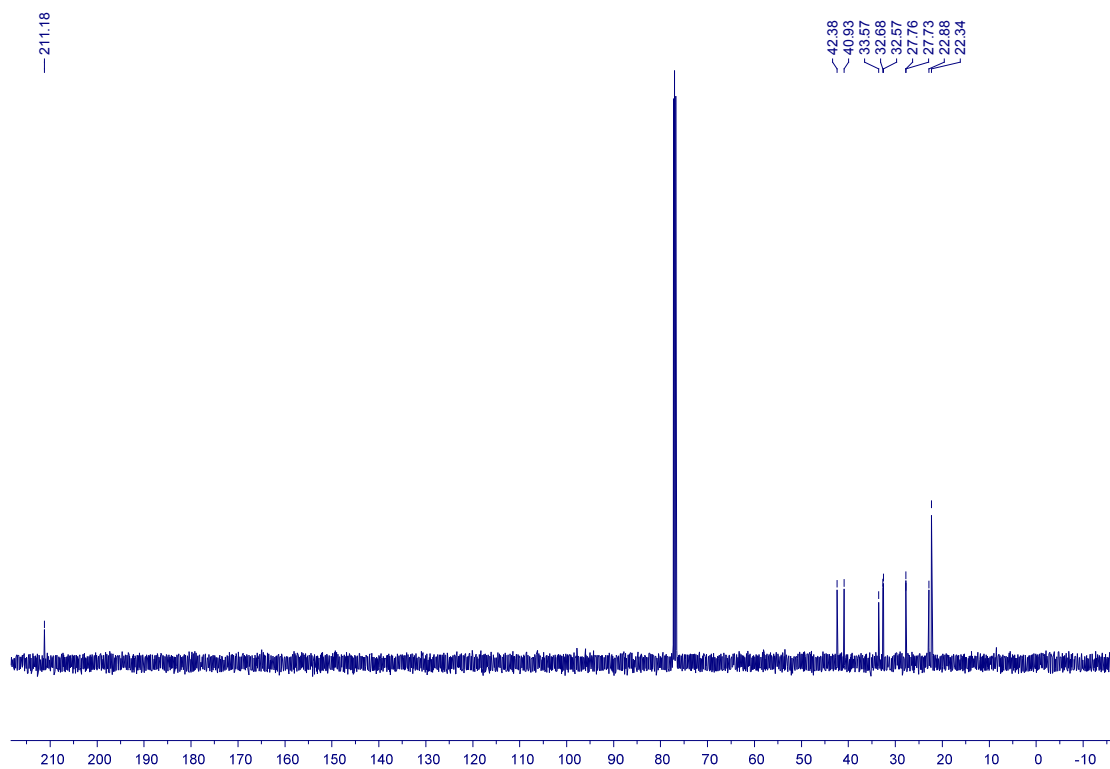

S22 <sup>1</sup>H NMR (400 MHz, CDCl<sub>3</sub>)

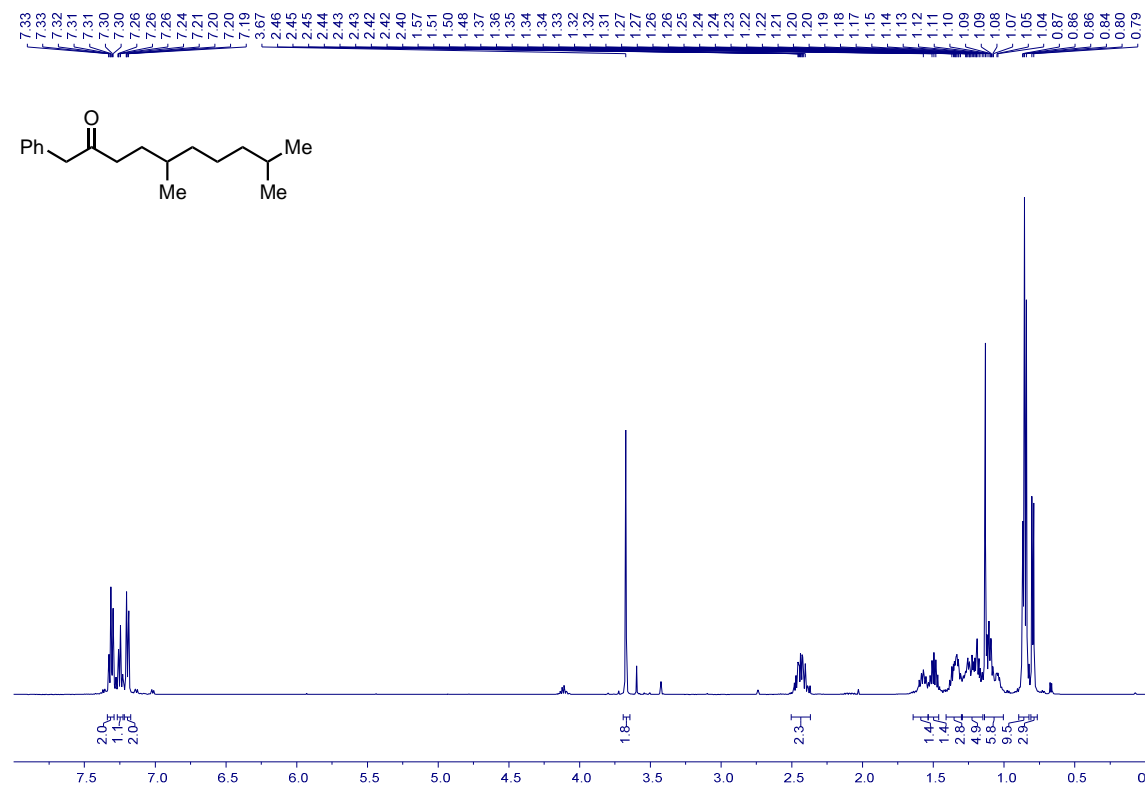

S22 <sup>13</sup>C NMR (101 MHz, CDCl<sub>3</sub>)

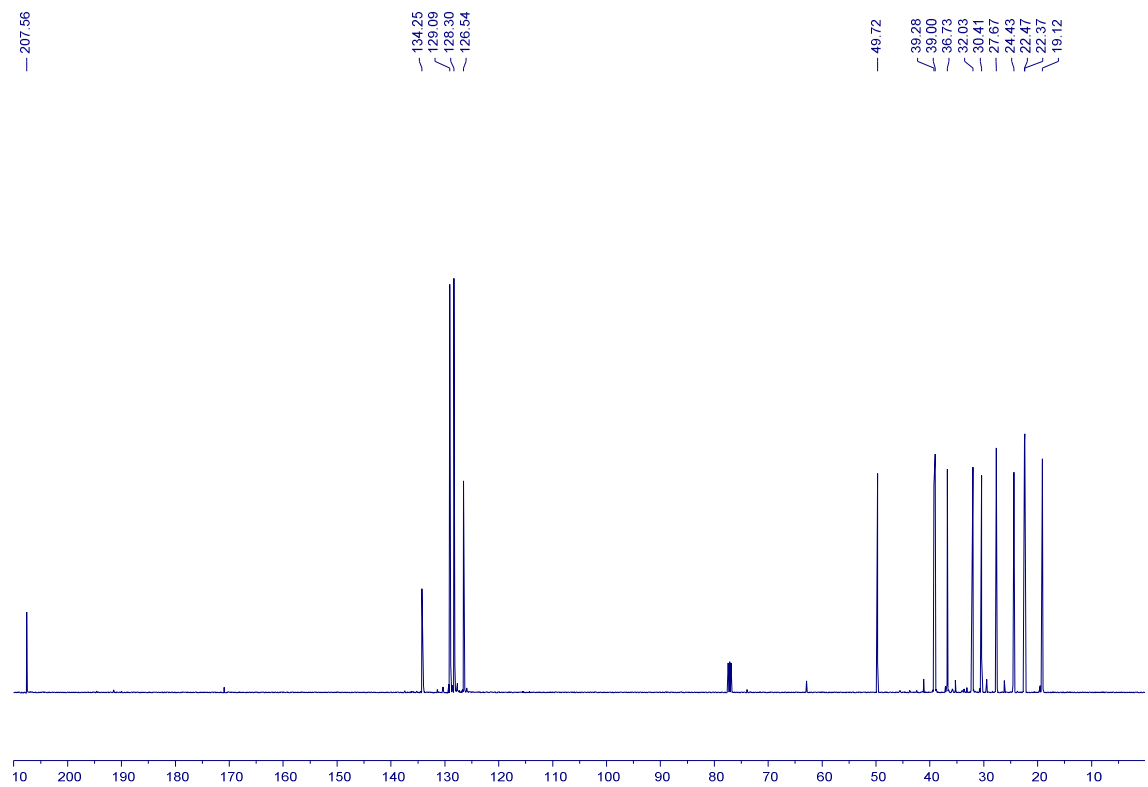

S23 <sup>1</sup>H NMR (500 MHz, CDCl<sub>3</sub>)

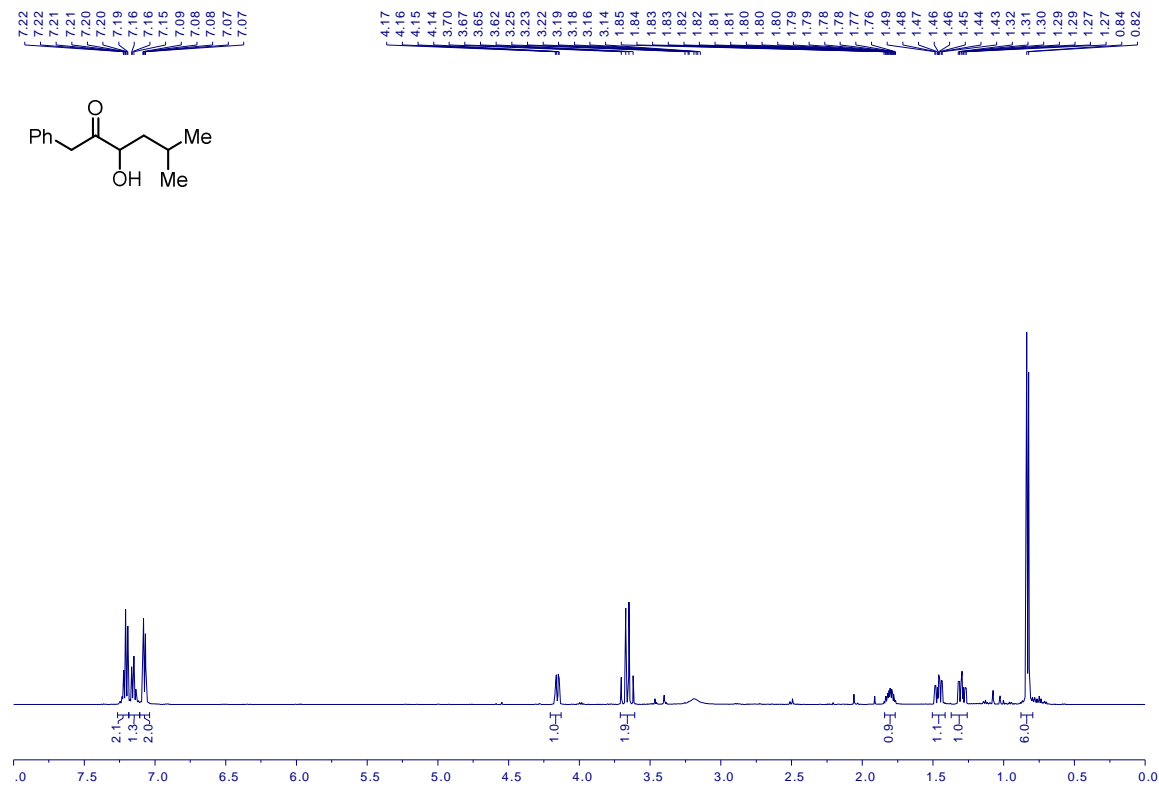

S23 <sup>13</sup>C NMR (126 MHz, CDCl<sub>3</sub>)

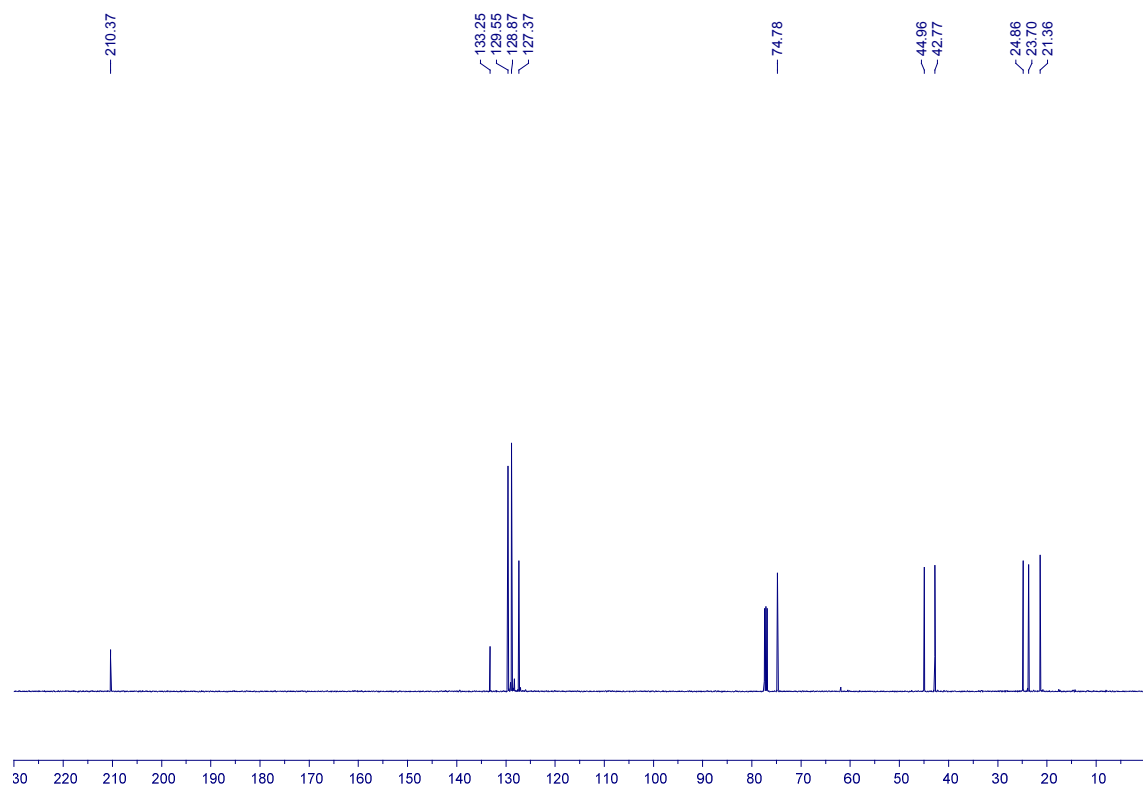

### S24 <sup>1</sup>H NMR (500 MHz, CDCl<sub>3</sub>)

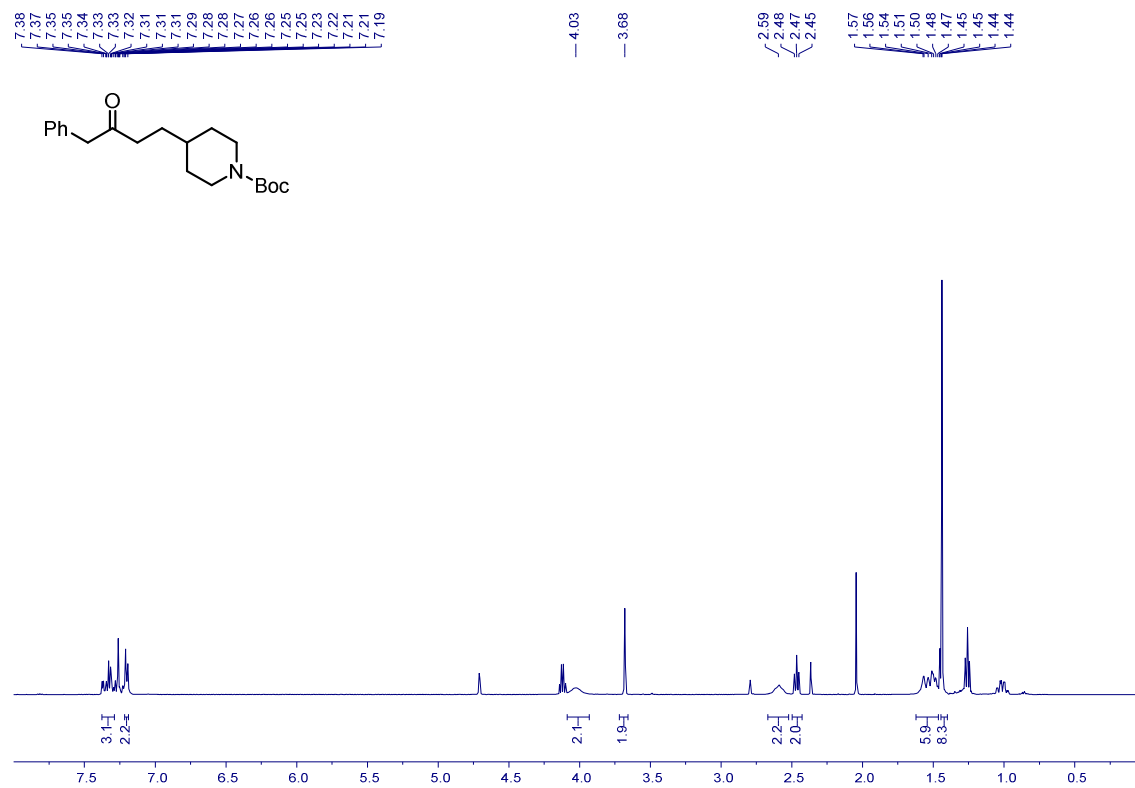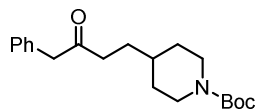

### S24 <sup>13</sup>C NMR (126 MHz, CDCl<sub>3</sub>)

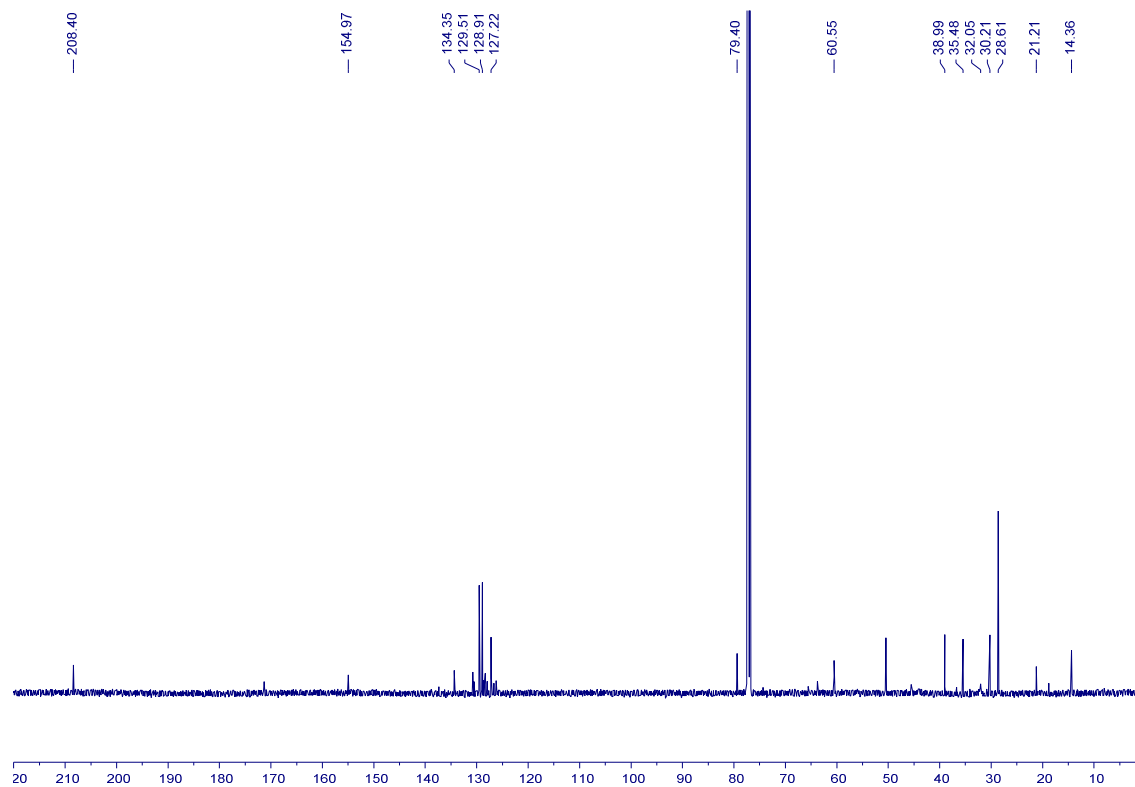

S25  $^1\text{H}$  NMR (400 MHz,  $\text{CDCl}_3$ )

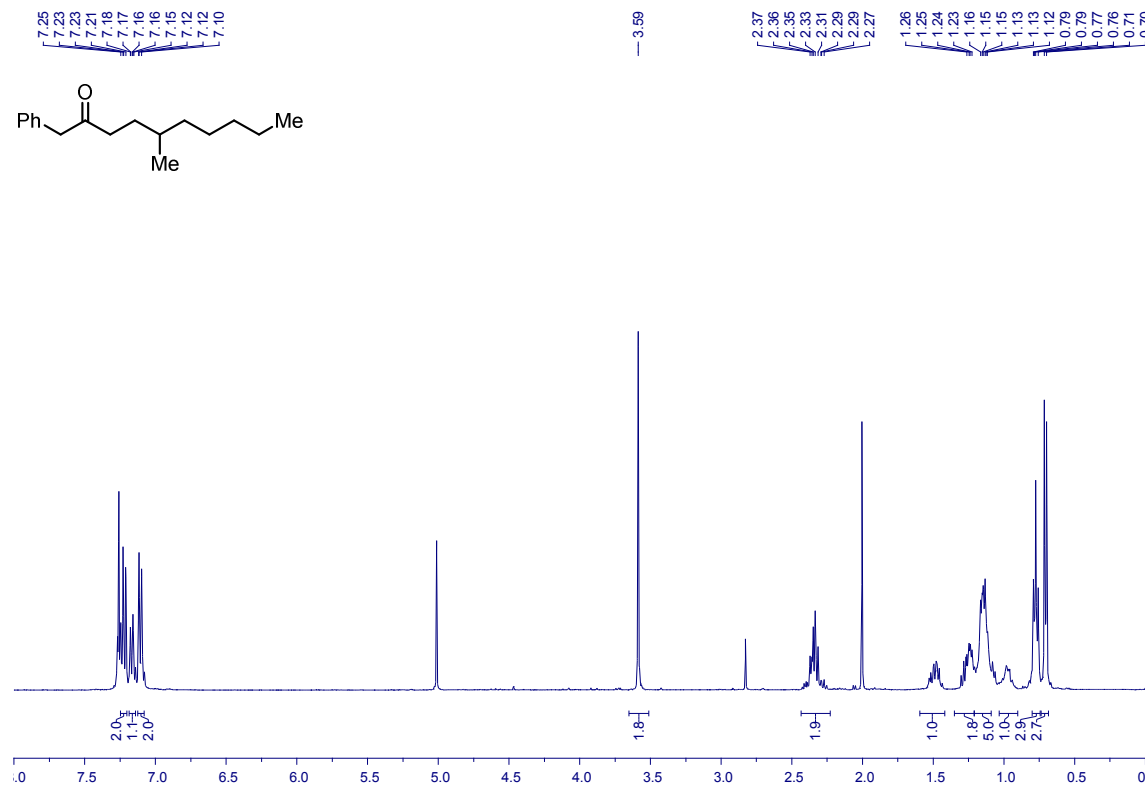

S25  $^{13}\text{C}$  NMR (101 MHz,  $\text{CDCl}_3$ )

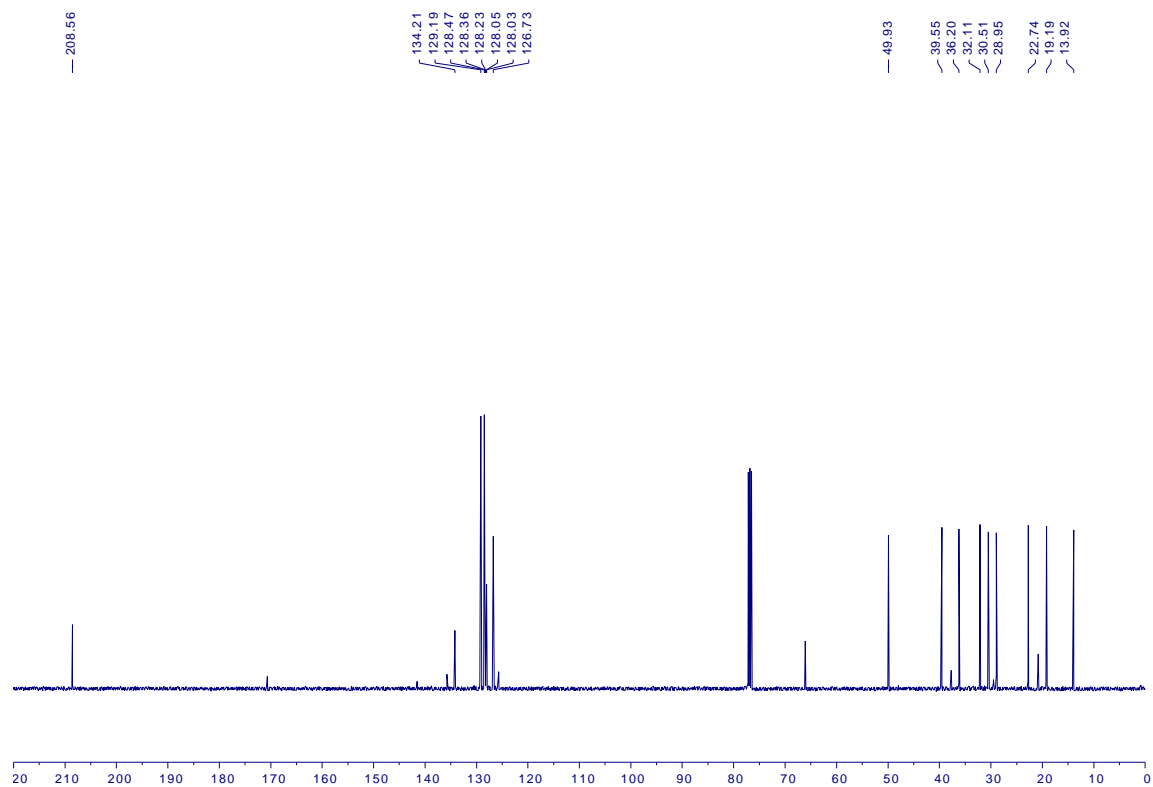

S26  $^1\text{H}$  NMR (400 MHz,  $\text{CDCl}_3$ )

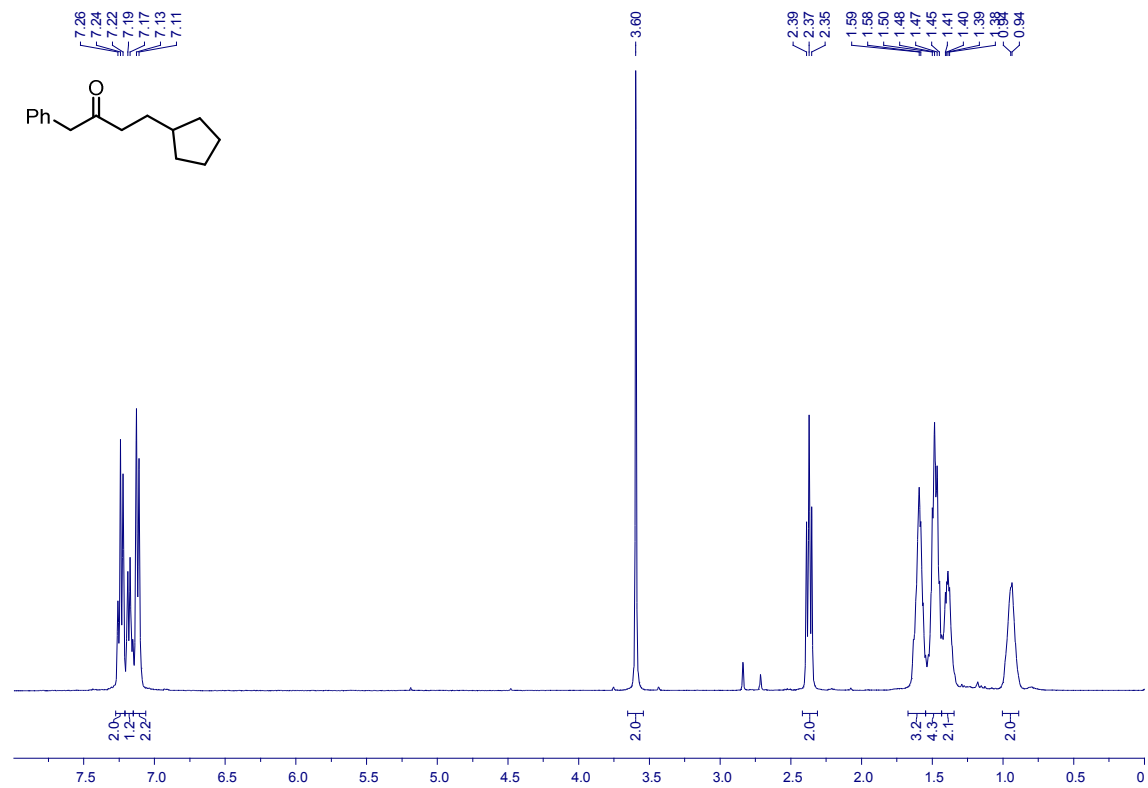

S26  $^{13}\text{C}$  NMR (126 MHz,  $\text{CDCl}_3$ )

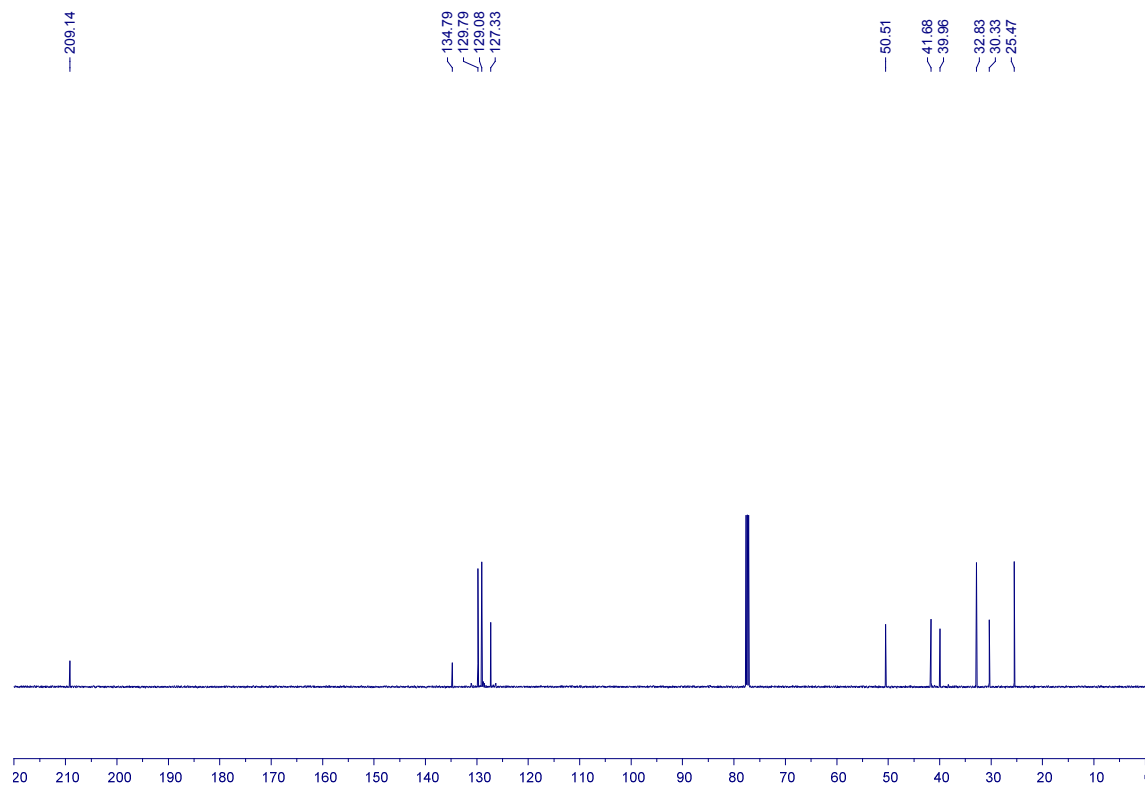

S27  $^1\text{H}$  NMR (400 MHz,  $\text{CDCl}_3$ )

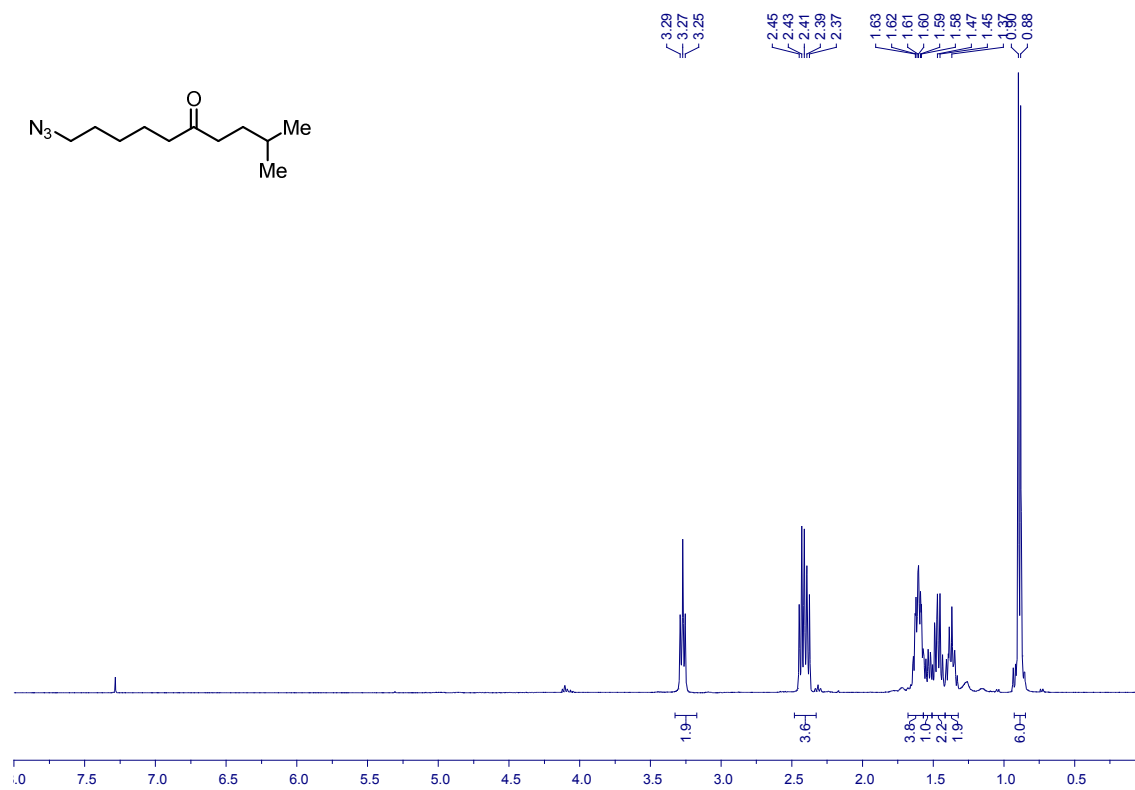

S27  $^{13}\text{C}$  NMR (101 MHz,  $\text{CDCl}_3$ )

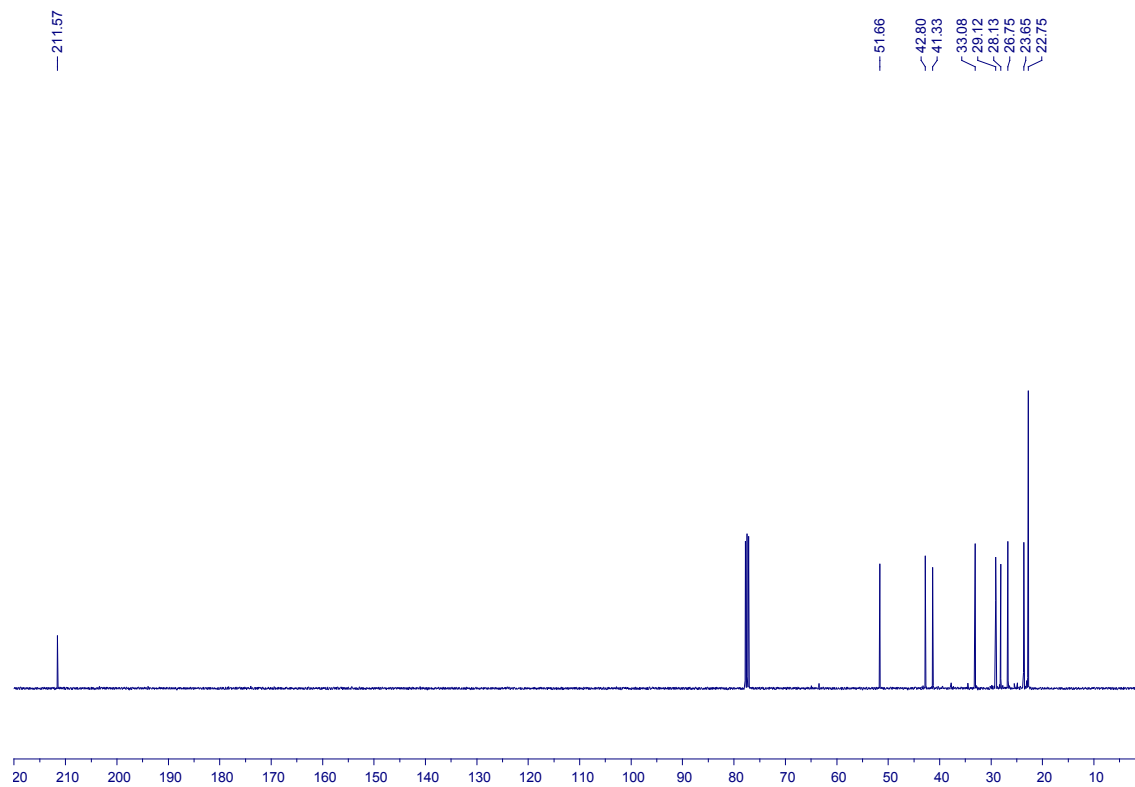



S28  $^1\text{H}$  NMR (500 MHz,  $\text{CDCl}_3$ )

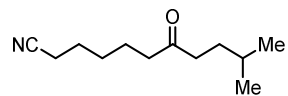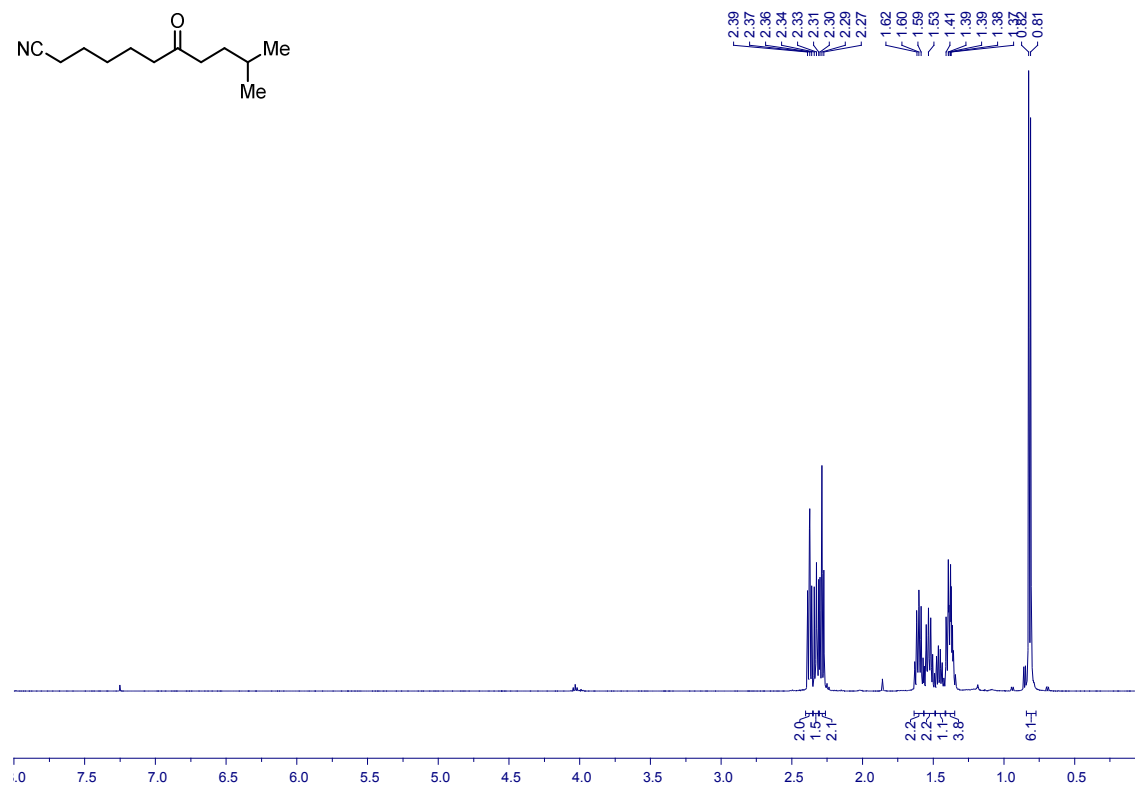

S28  $^{13}\text{C}$  NMR (126 MHz,  $\text{CDCl}_3$ )

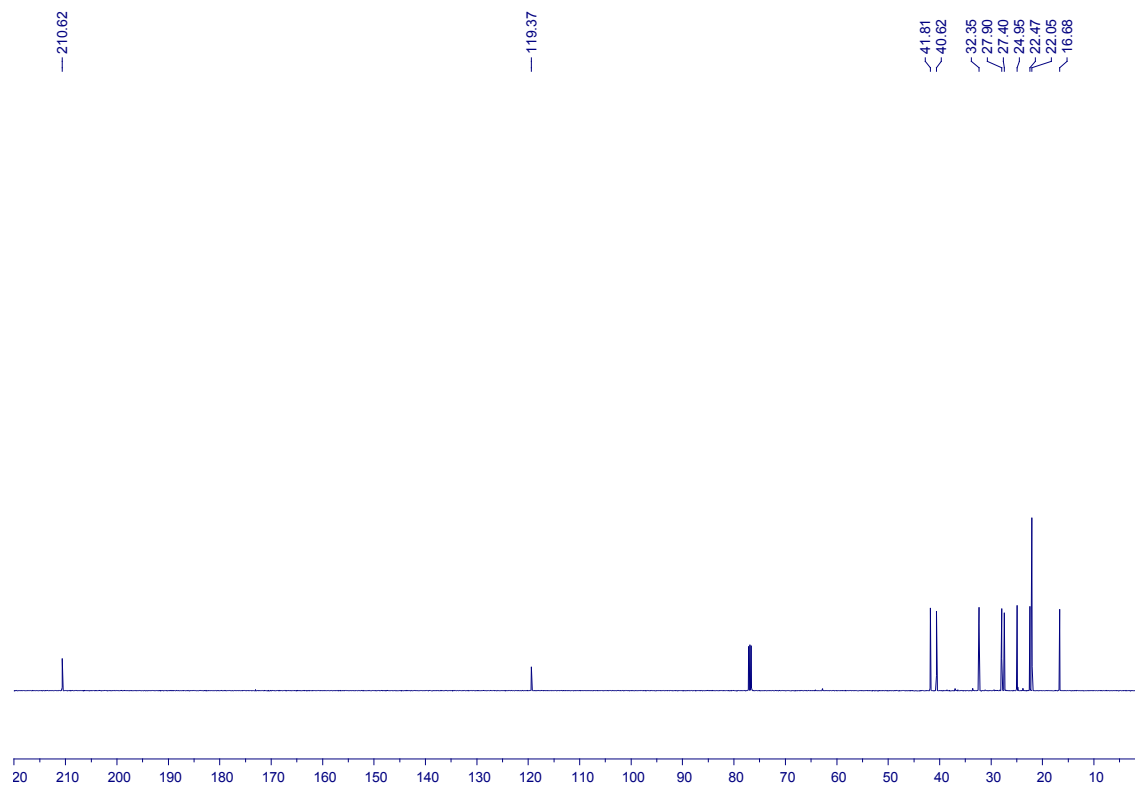

S29  $^1\text{H}$  NMR (400 MHz,  $\text{CDCl}_3$ )

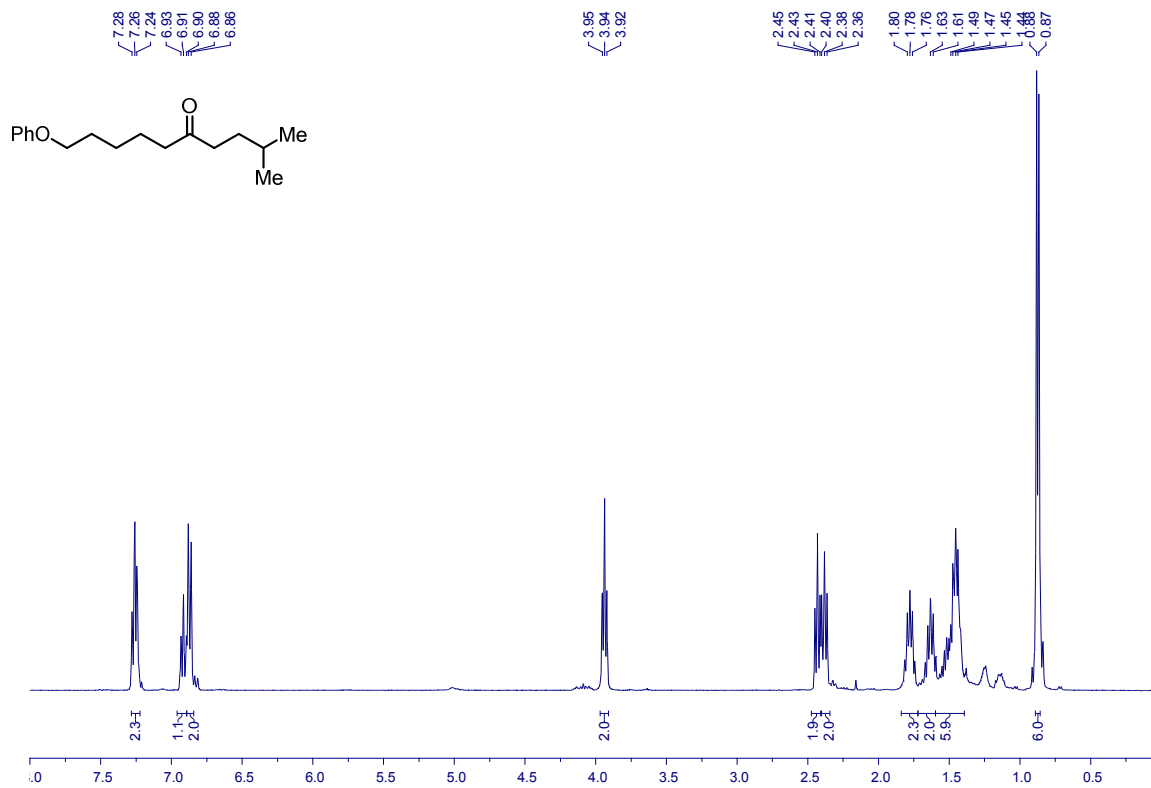

S29  $^{13}\text{C}$  NMR (101 MHz,  $\text{CDCl}_3$ )

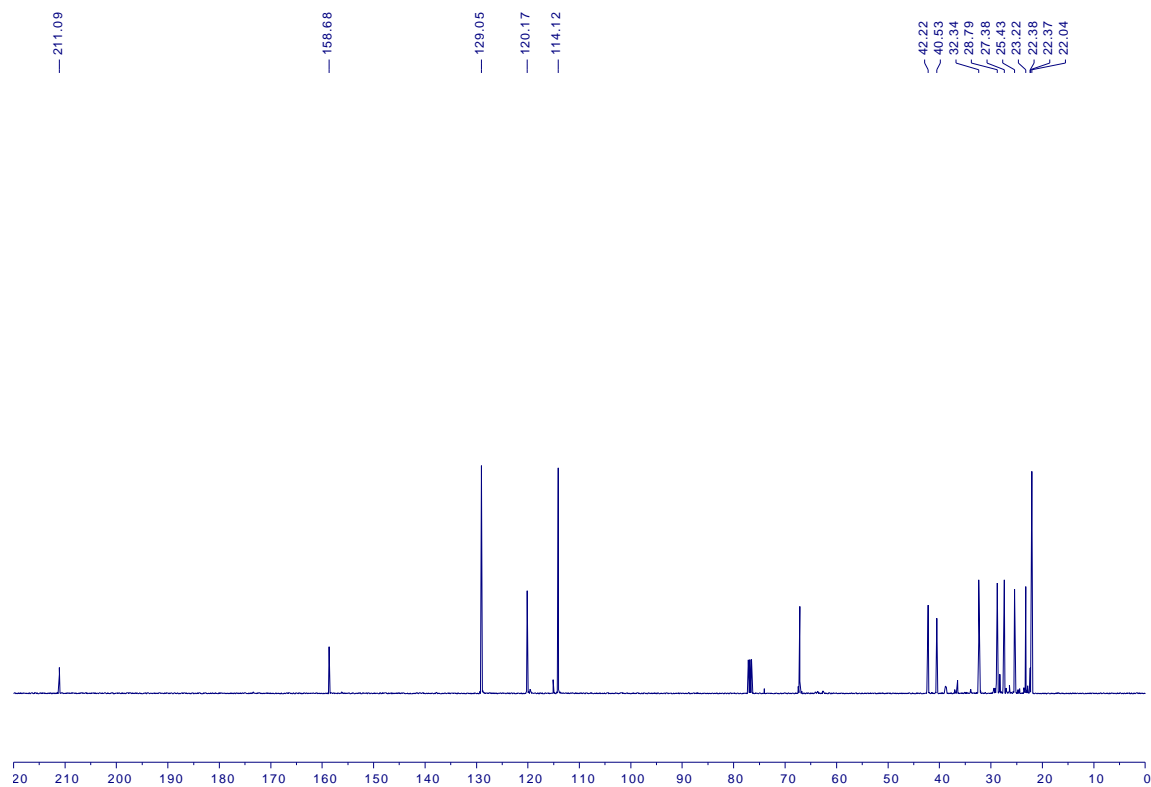



**1a**  $^1\text{H}$  NMR (500 MHz,  $\text{CDCl}_3$ )

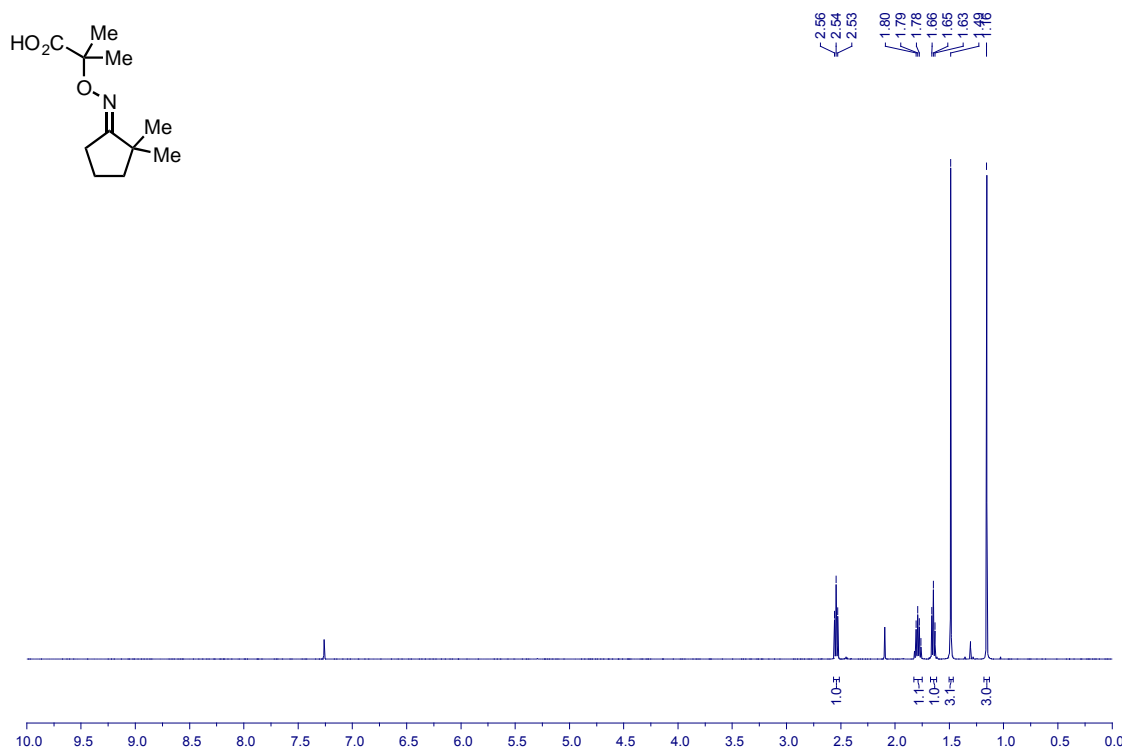

**1a**  $^{13}\text{C}$  NMR (126 MHz,  $\text{CDCl}_3$ )

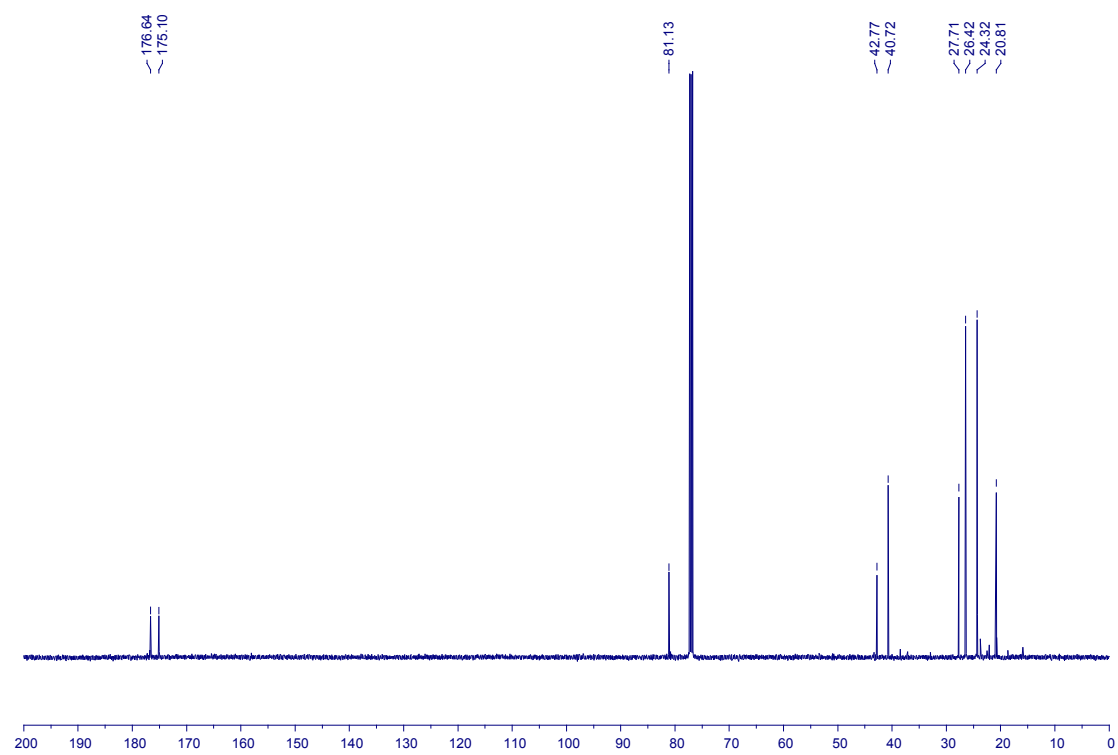

**1b**  $^1\text{H}$  NMR (500 MHz,  $\text{CDCl}_3$ )

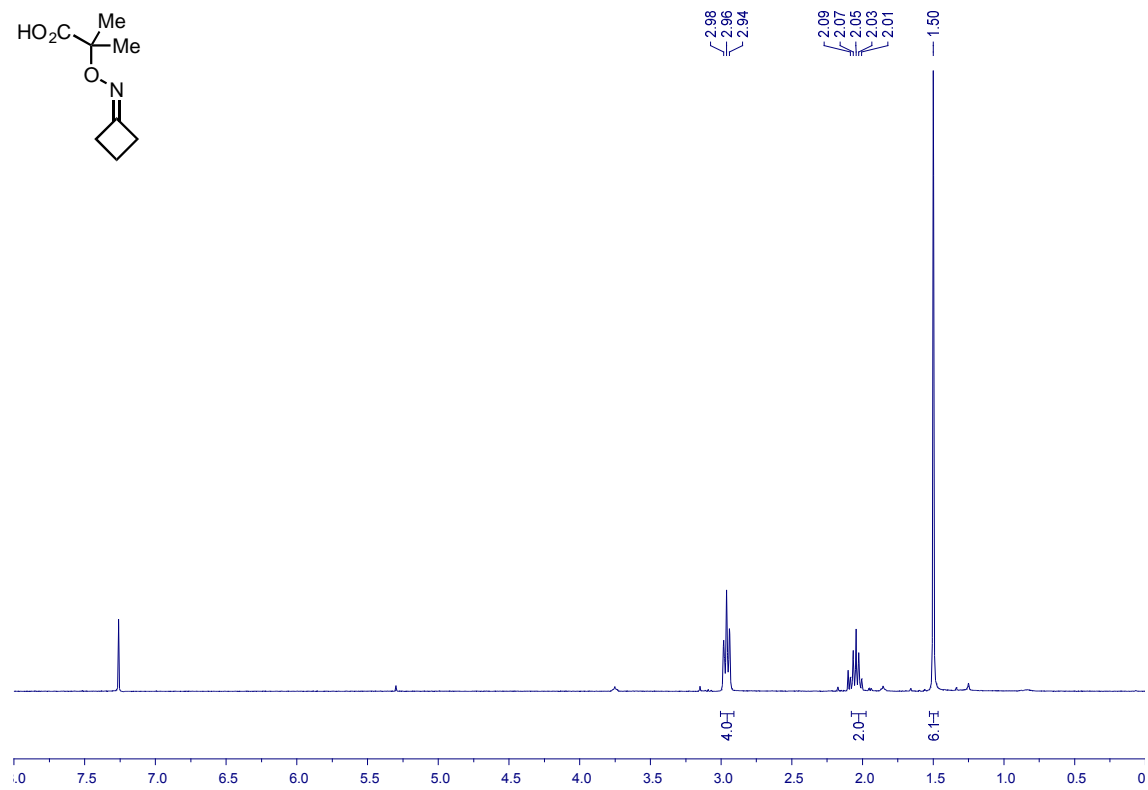

**1b**  $^{13}\text{C}$  NMR (126 MHz,  $\text{CDCl}_3$ )

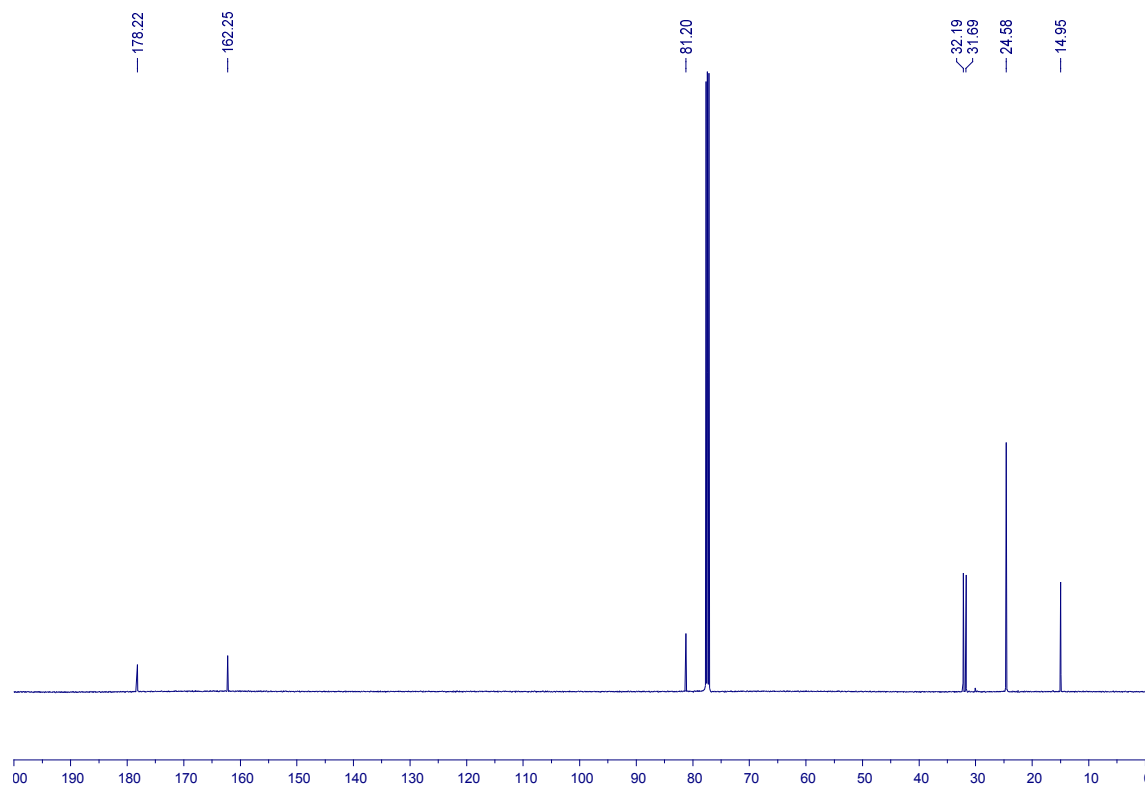

**1c**  $^1\text{H}$  NMR (500 MHz,  $\text{CDCl}_3$ )

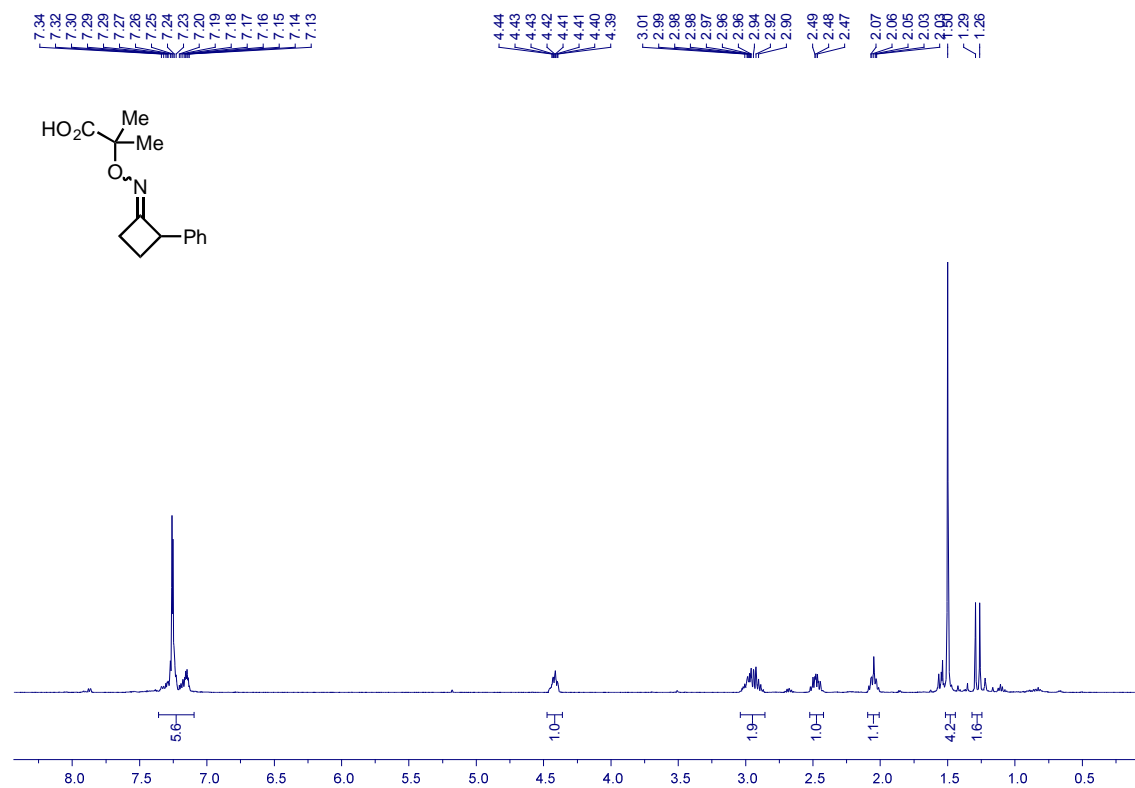

**1c**  $^{13}\text{C}$  NMR (126 MHz,  $\text{CDCl}_3$ )

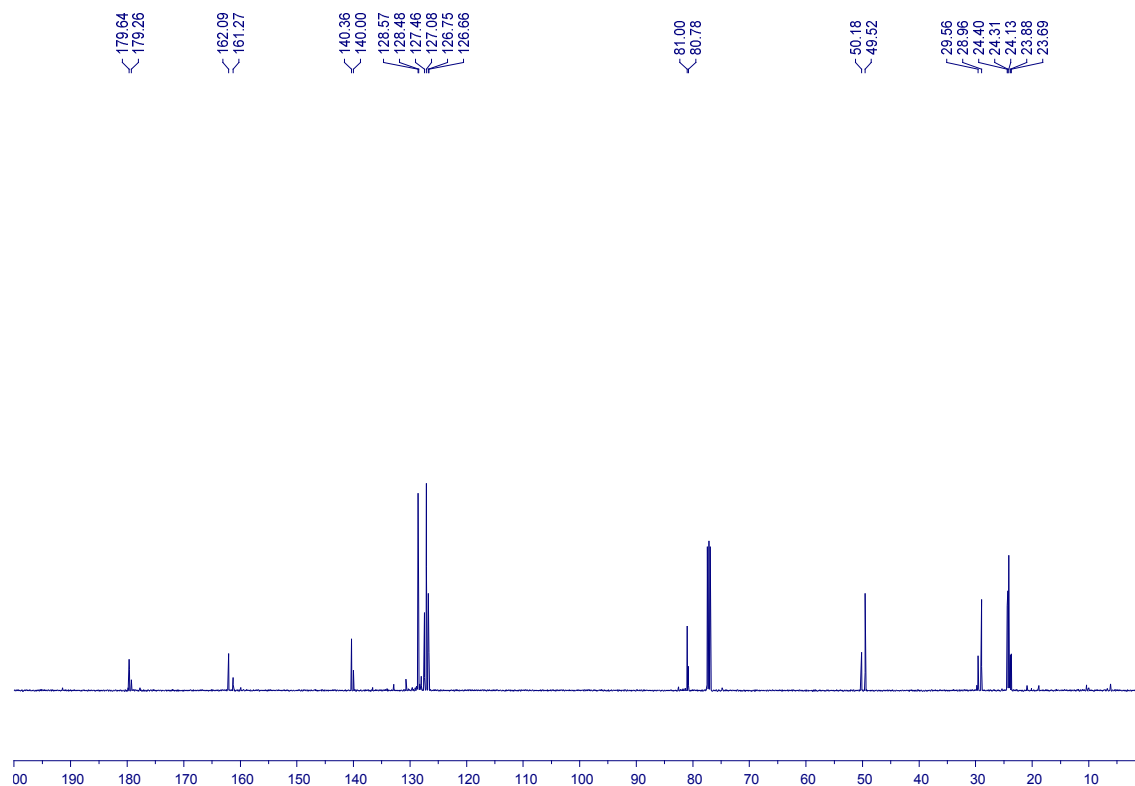

**1d**  $^1\text{H}$  NMR (500 MHz,  $\text{CDCl}_3$ )

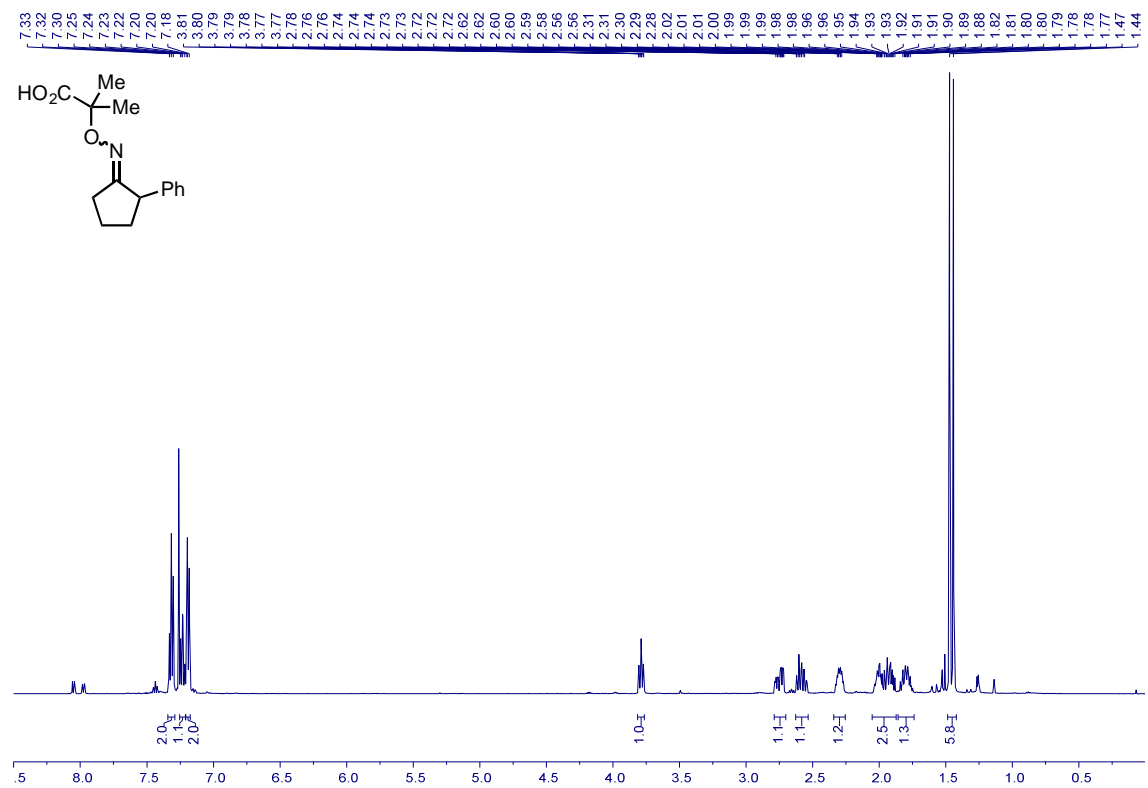

**1d**  $^{13}\text{C}$  NMR (126 MHz,  $\text{CDCl}_3$ )

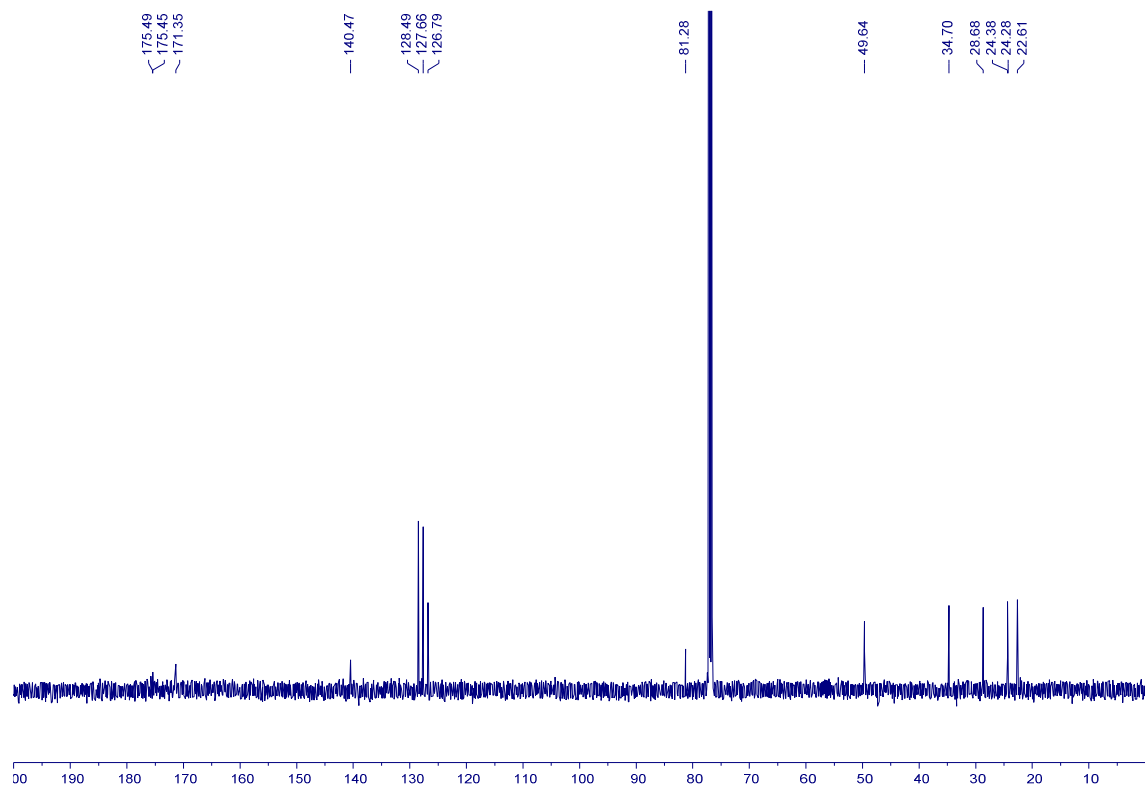

**1e**  $^1\text{H}$  NMR (400 MHz,  $\text{CDCl}_3$ )

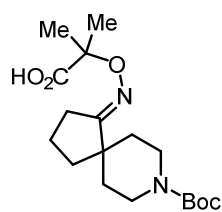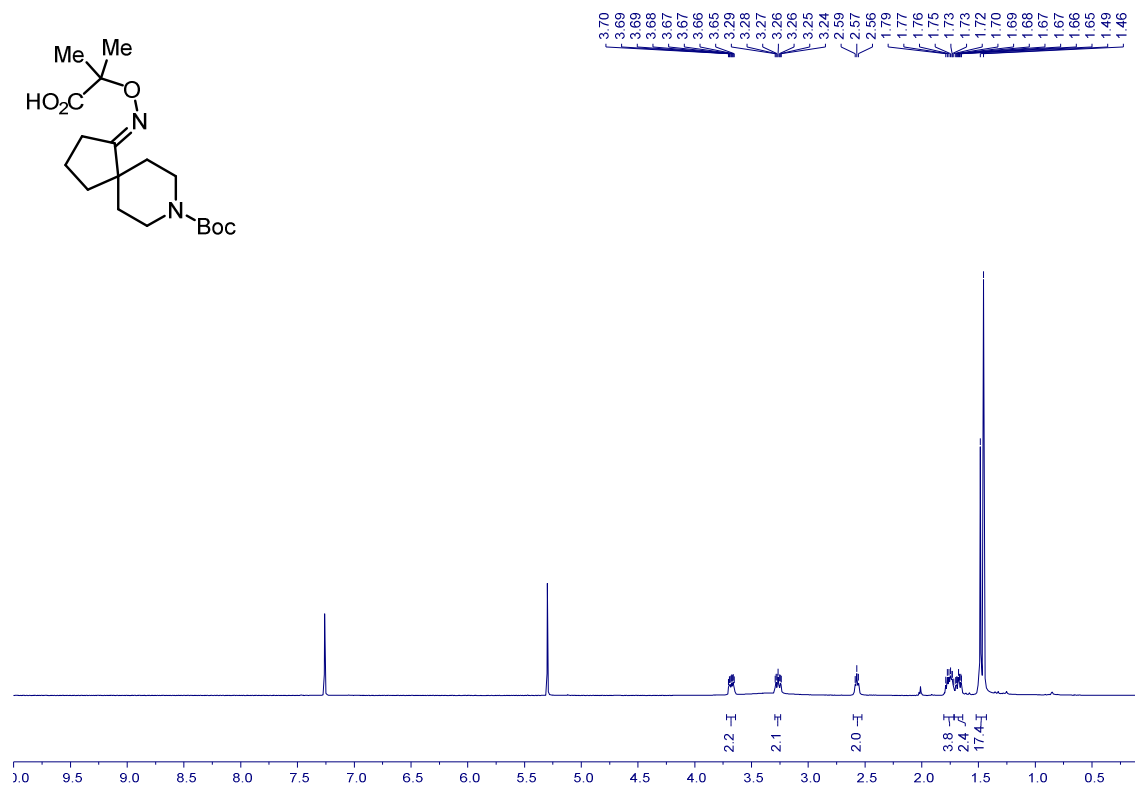

**1e**  $^{13}\text{C}$  NMR (101 MHz,  $\text{CDCl}_3$ )

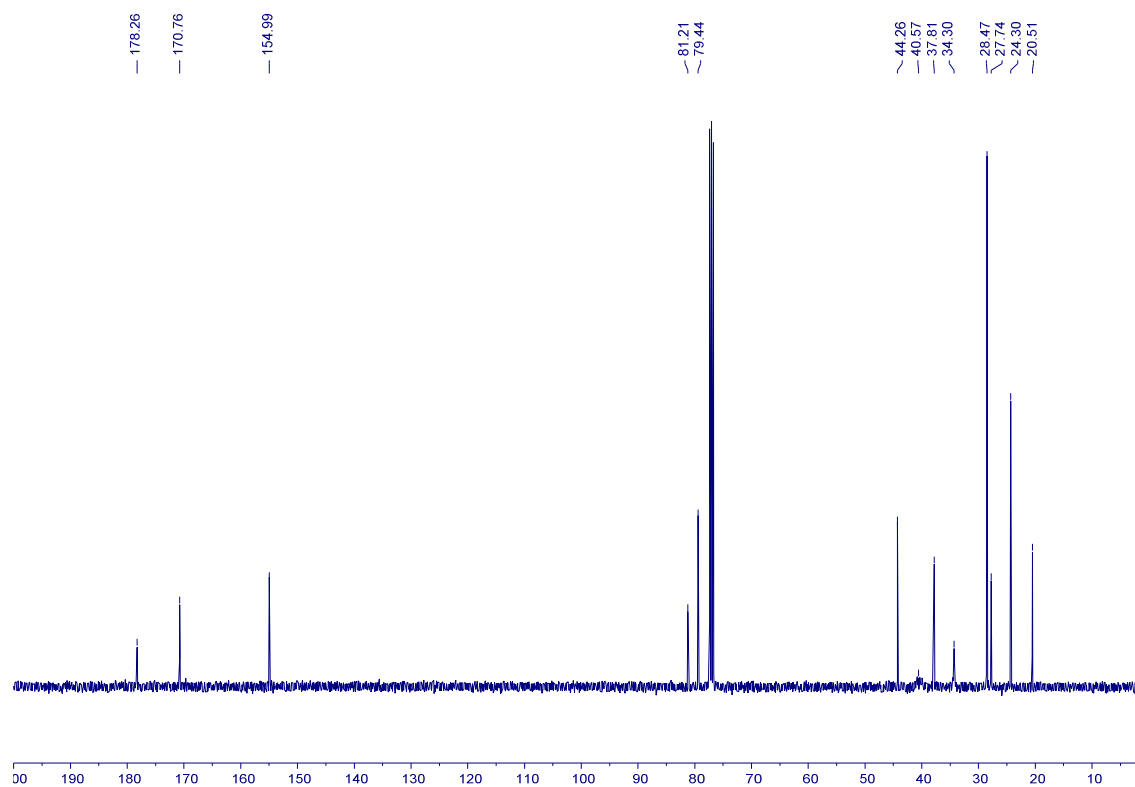



**1f**  $^1\text{H}$  NMR (500 MHz,  $\text{CDCl}_3$ )

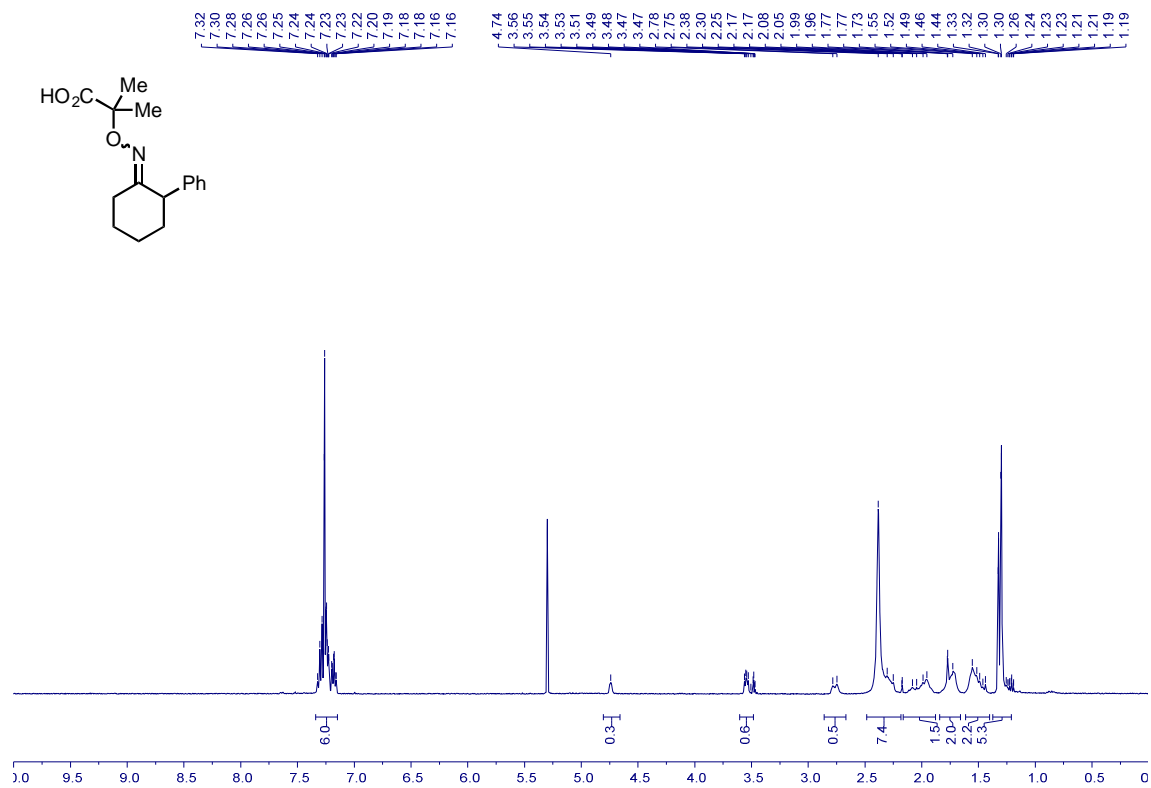

**1f**  $^{13}\text{C}$  NMR (101 MHz,  $\text{CDCl}_3$ )

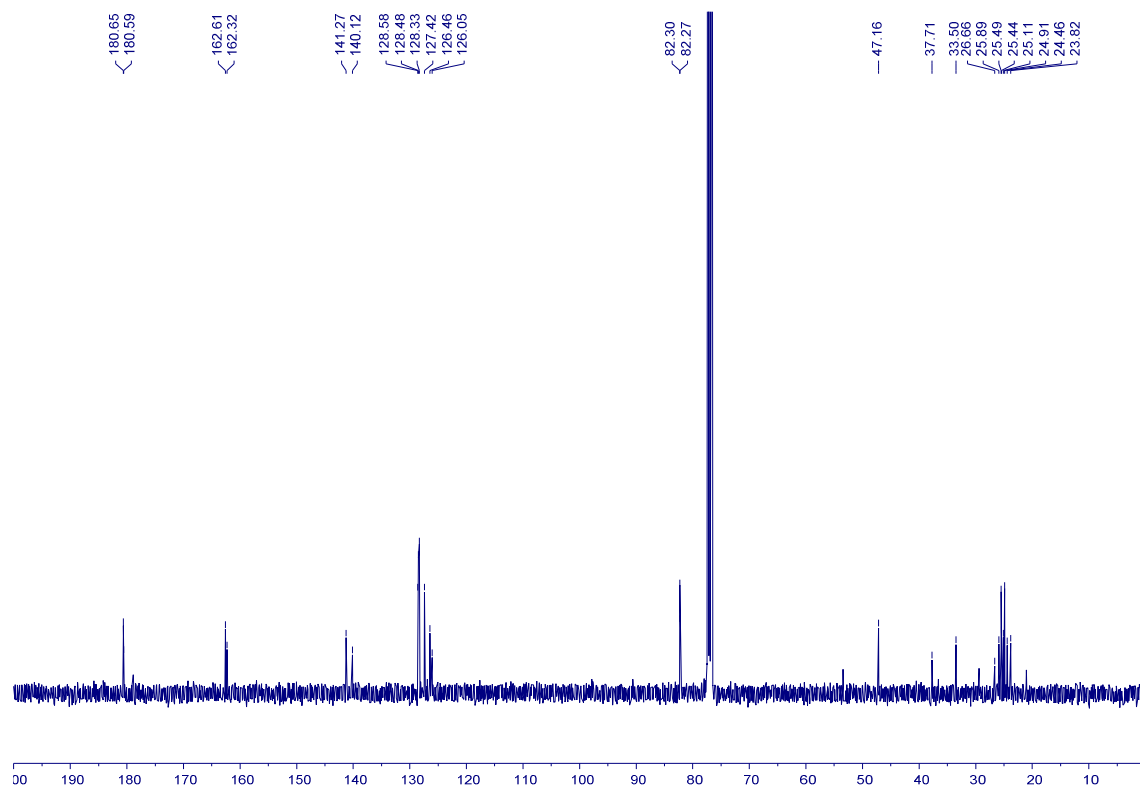

**1g**  $^1\text{H}$  NMR (400 MHz,  $\text{CDCl}_3$ )

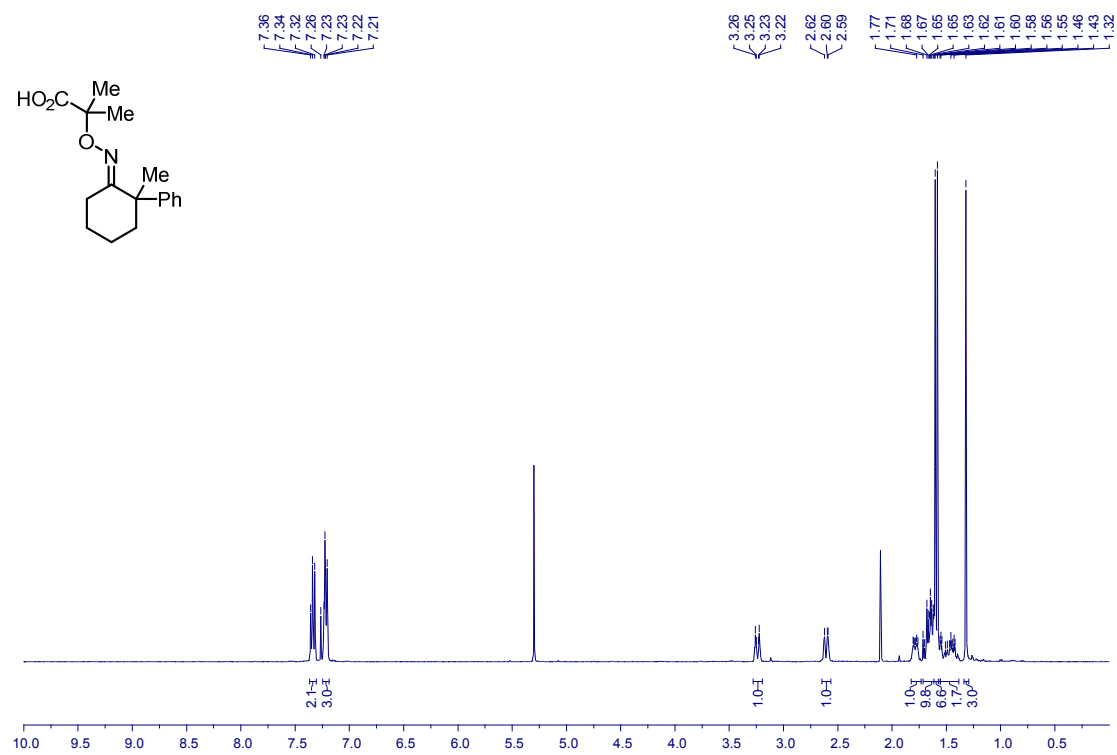

**1g**  $^{13}\text{C}$  NMR (101 MHz,  $\text{CDCl}_3$ )

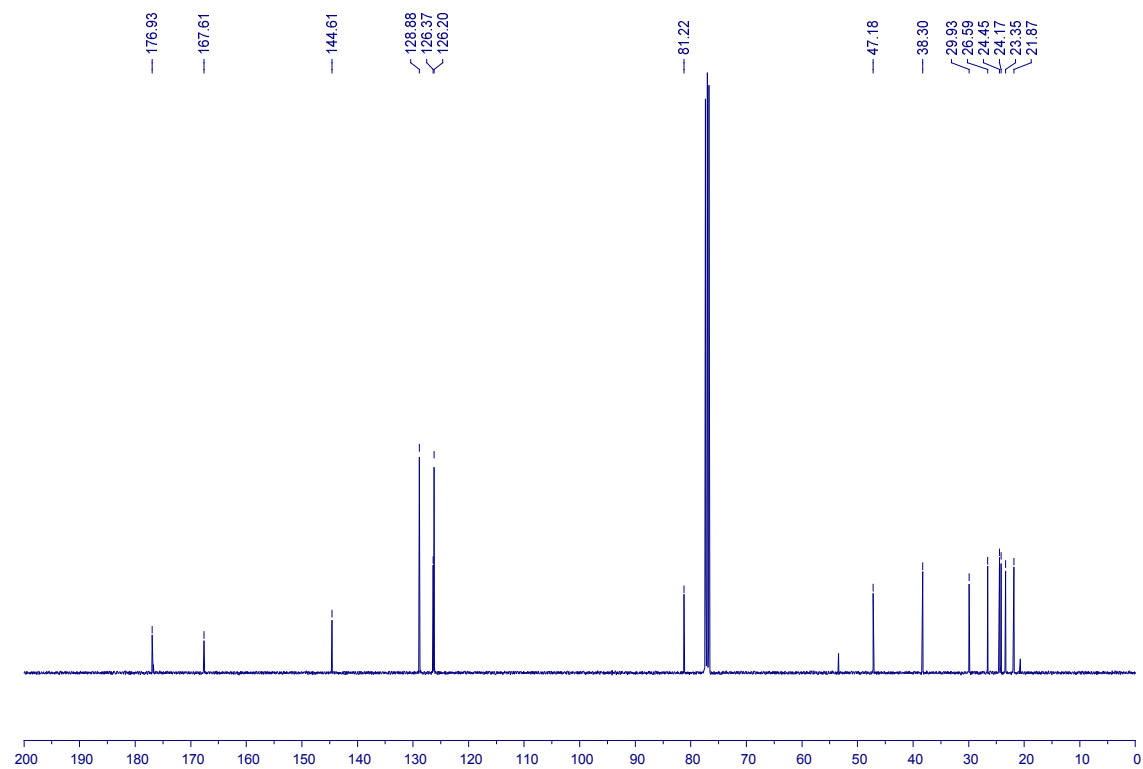

**1h**  $^1\text{H}$  NMR (500 MHz,  $\text{CDCl}_3$ )

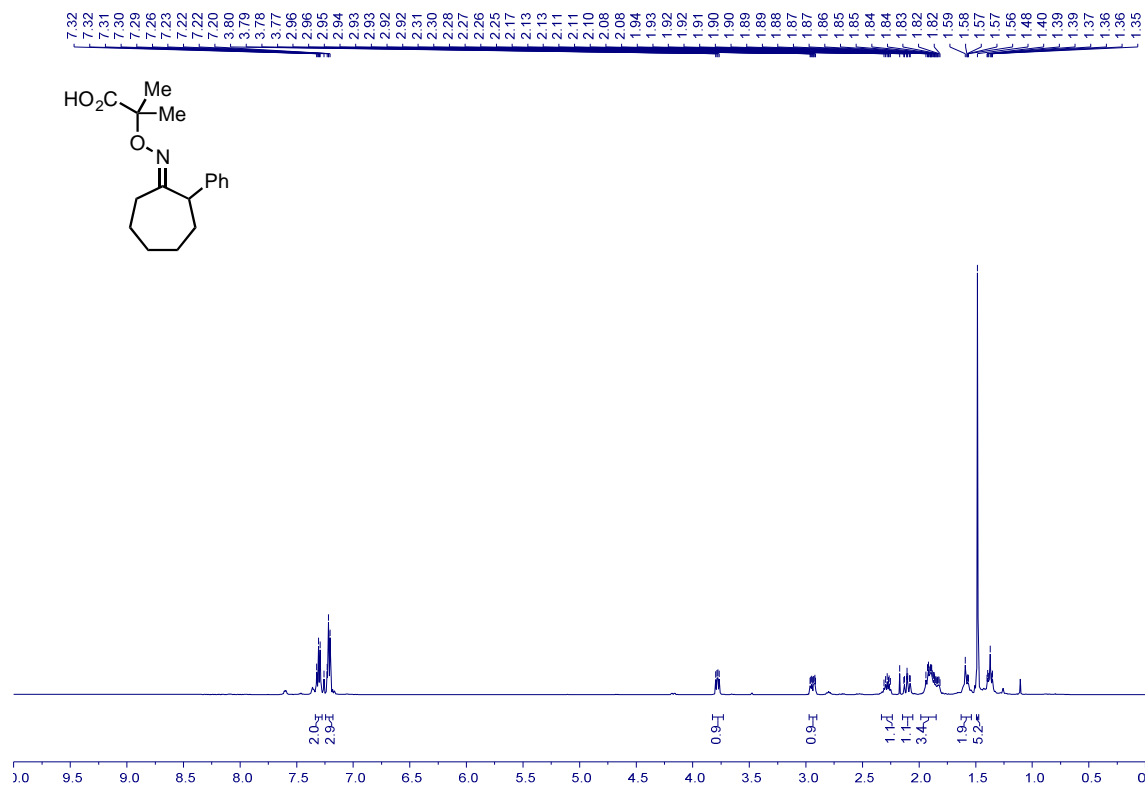

**1h**  $^{13}\text{C}$  NMR (126 MHz,  $\text{CDCl}_3$ )

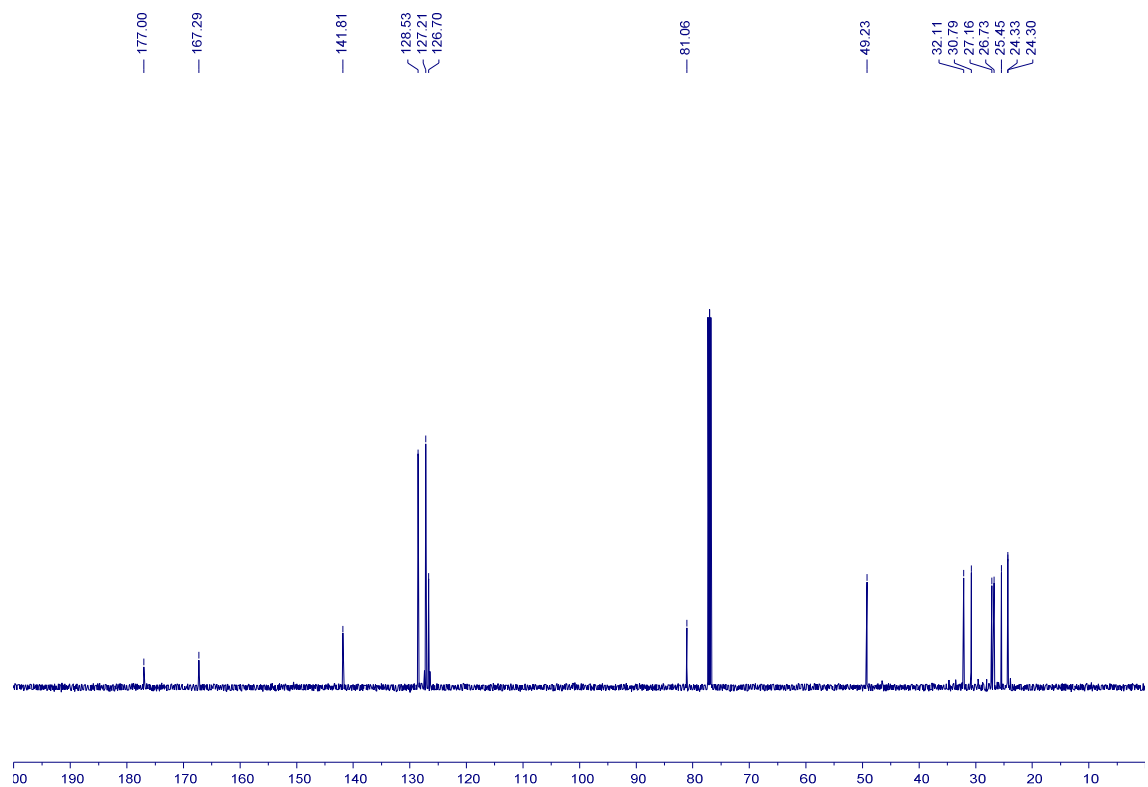

**1i**  $^1\text{H}$  NMR ( $\text{CDCl}_3$ , 400 MHz)

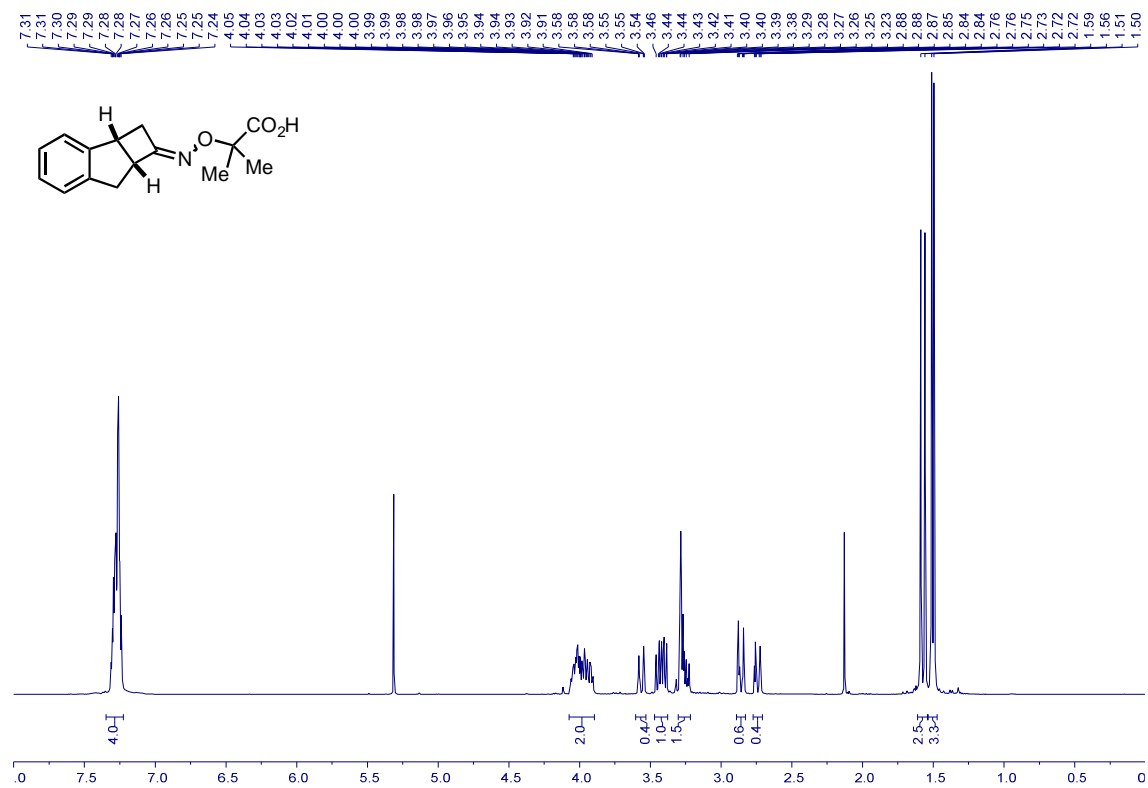

**1i**  $^{13}\text{C}$  NMR ( $\text{CDCl}_3$ , 126 MHz)

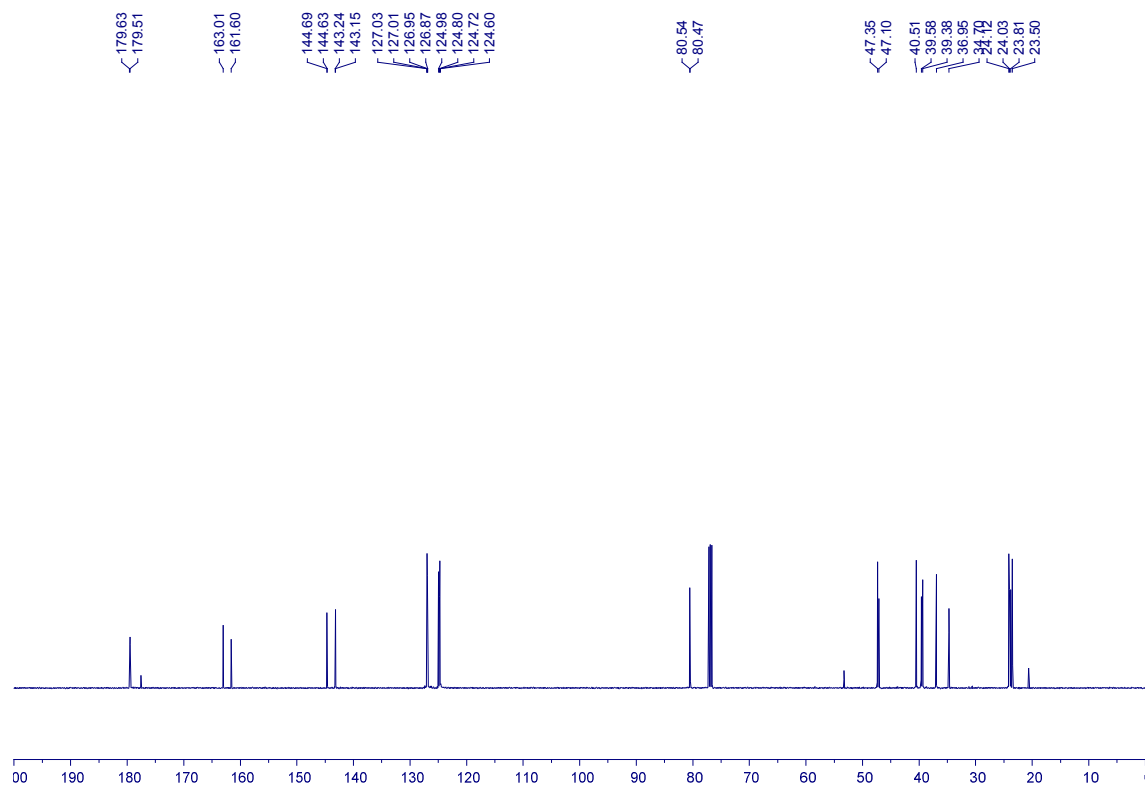

**1k**  $^1\text{H}$  NMR (500 MHz,  $\text{CDCl}_3$ )

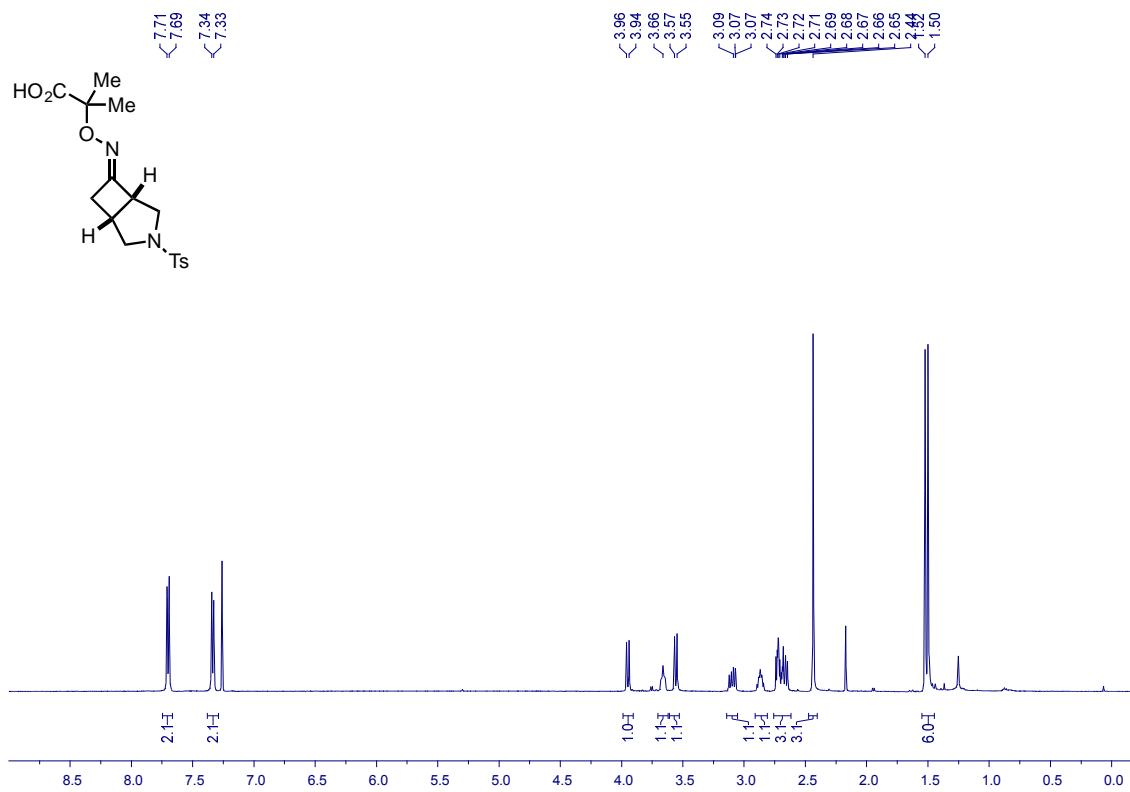

**1k**  $^{13}\text{C}$  NMR (126 MHz,  $\text{CDCl}_3$ )

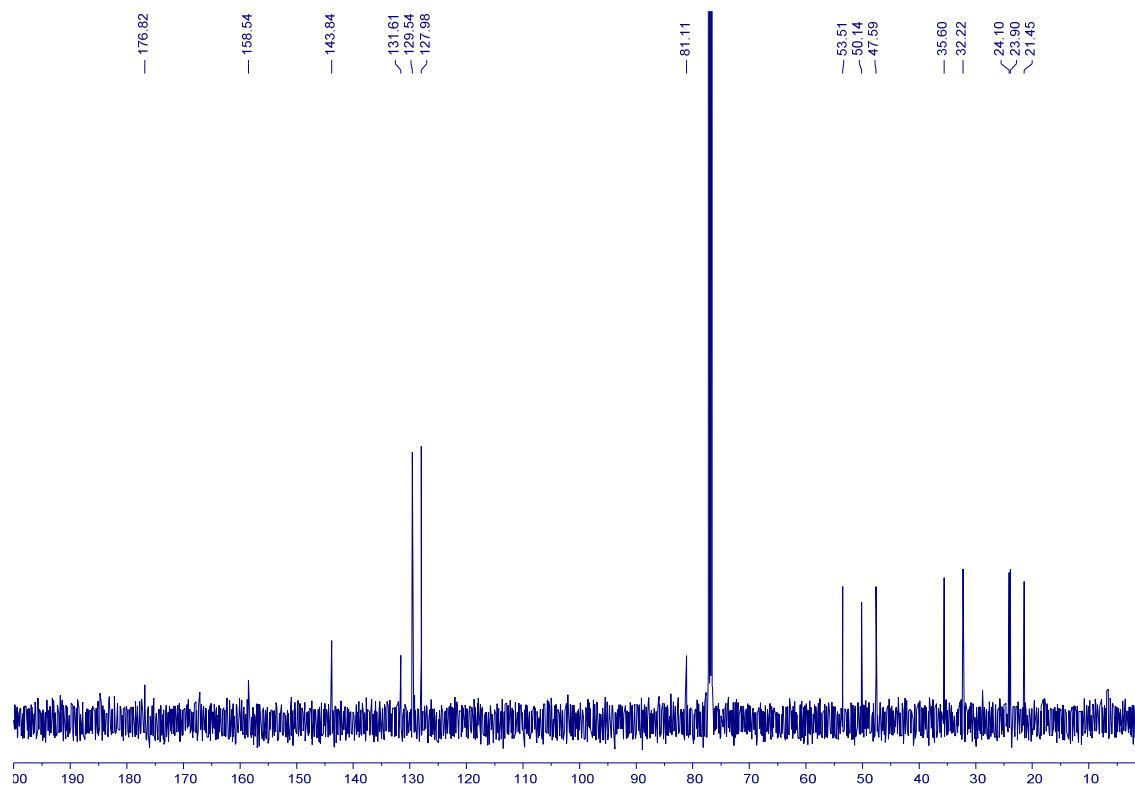

**1k**  $^1\text{H}$  NMR ( $\text{CDCl}_3$ , 500 MHz)

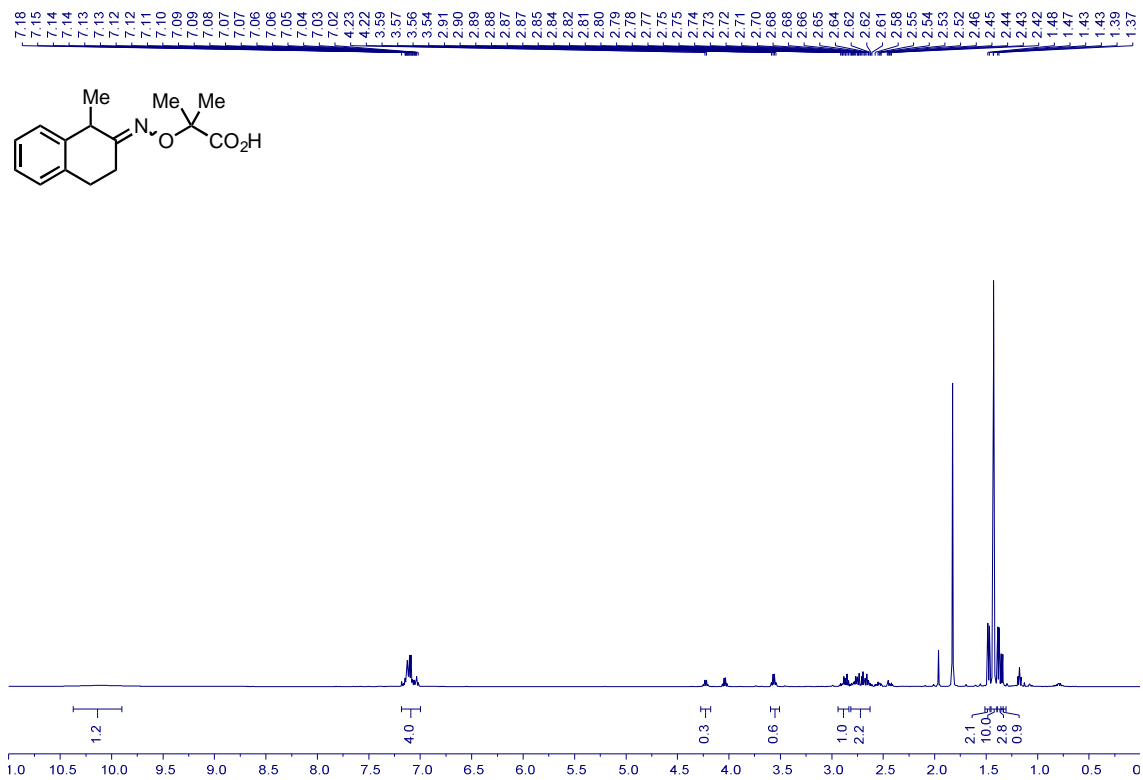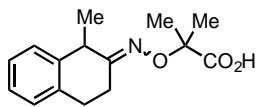

**1k**  $^{13}\text{C}$  NMR ( $\text{CDCl}_3$ , 126 MHz)

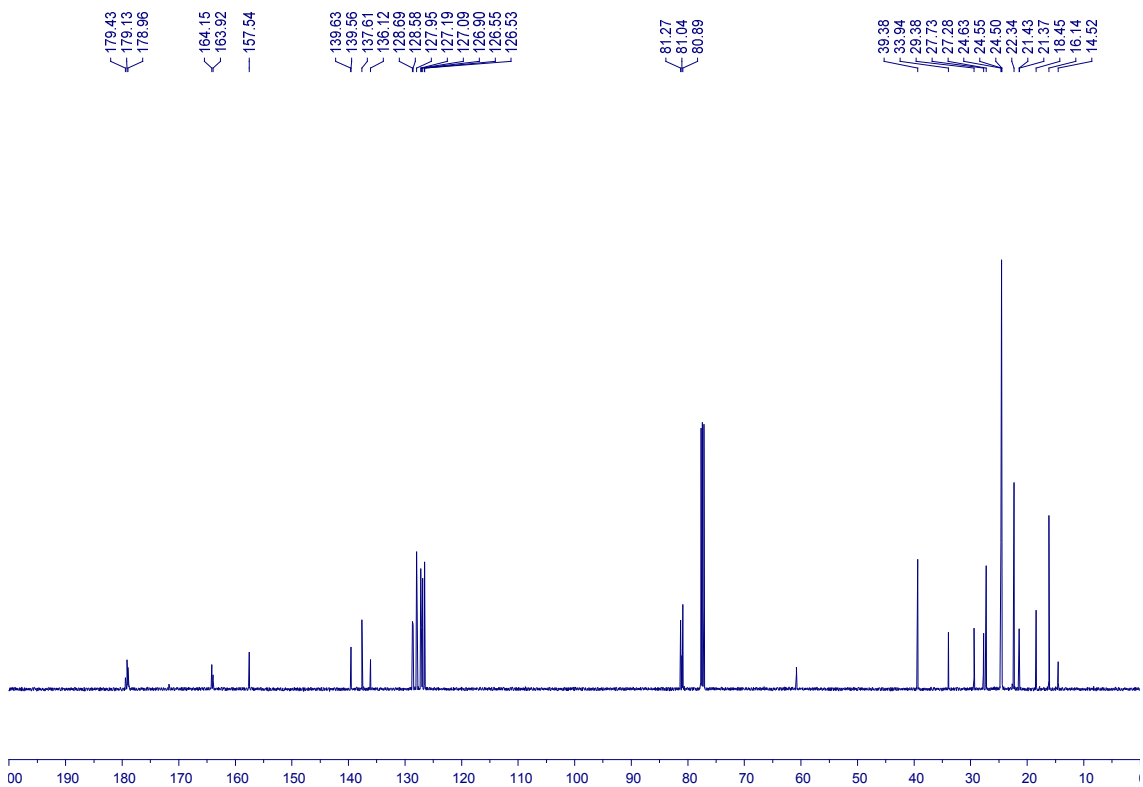

**11**  $^1\text{H}$  NMR (400 MHz,  $\text{CDCl}_3$ )

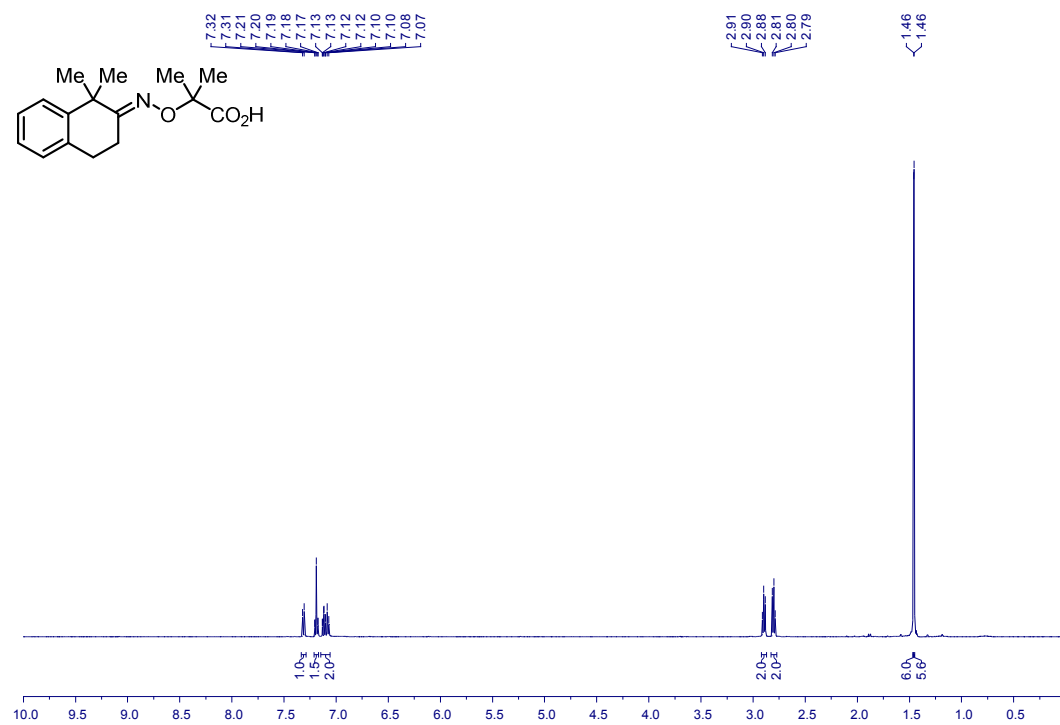

**11**  $^{13}\text{C}$  NMR (126 MHz,  $\text{CDCl}_3$ )

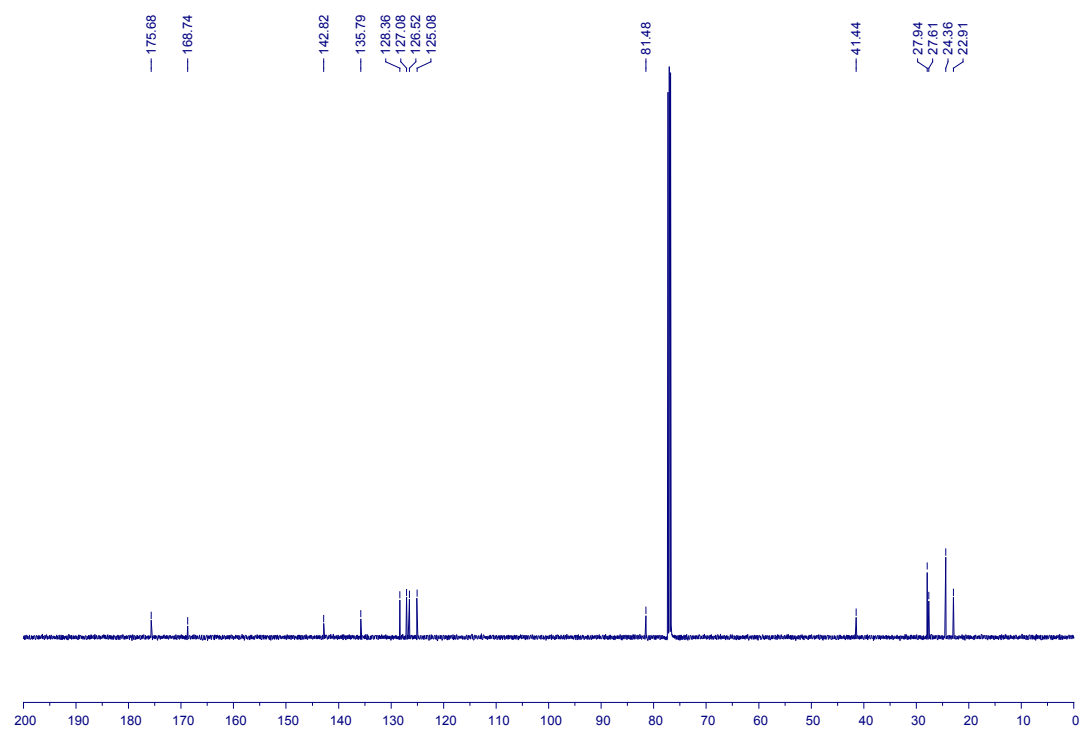

**1m**  $^1\text{H}$  NMR (400 MHz,  $\text{CDCl}_3$ )

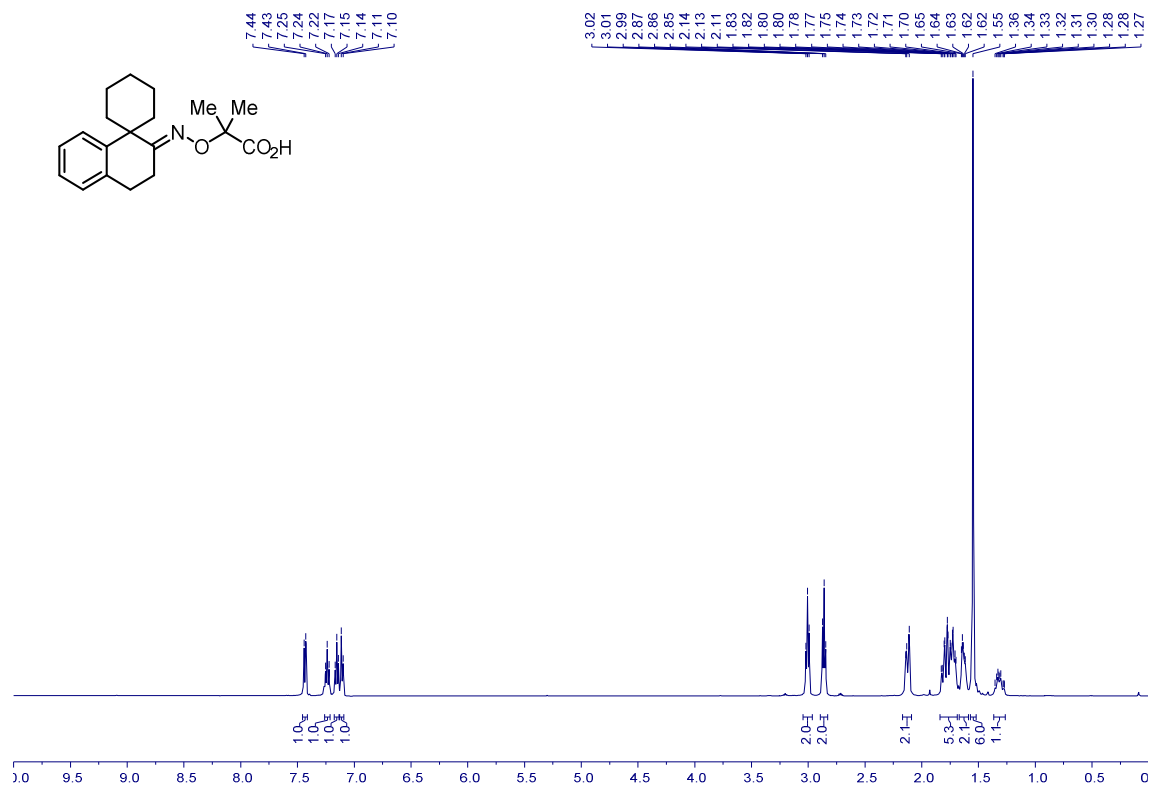

**1m**  $^{13}\text{C}$  NMR (101 MHz,  $\text{CDCl}_3$ )

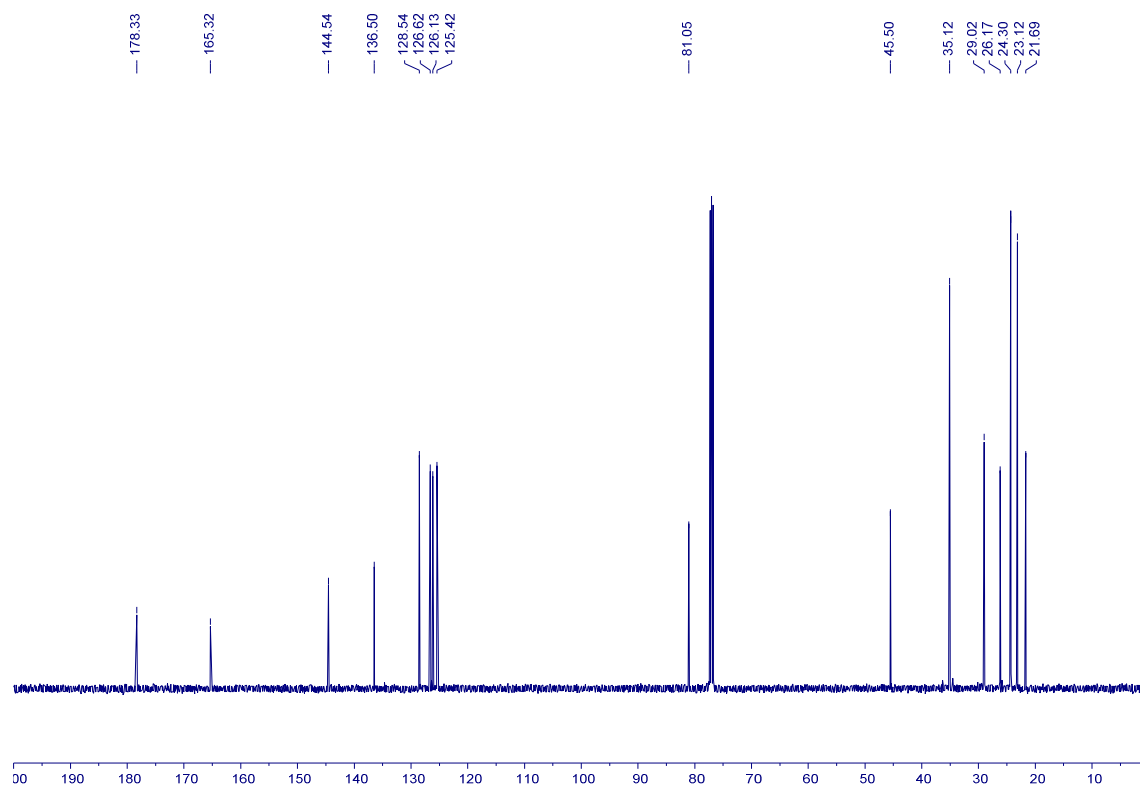



**1n**  $^1\text{H}$  NMR (400 MHz,  $\text{CDCl}_3$ )

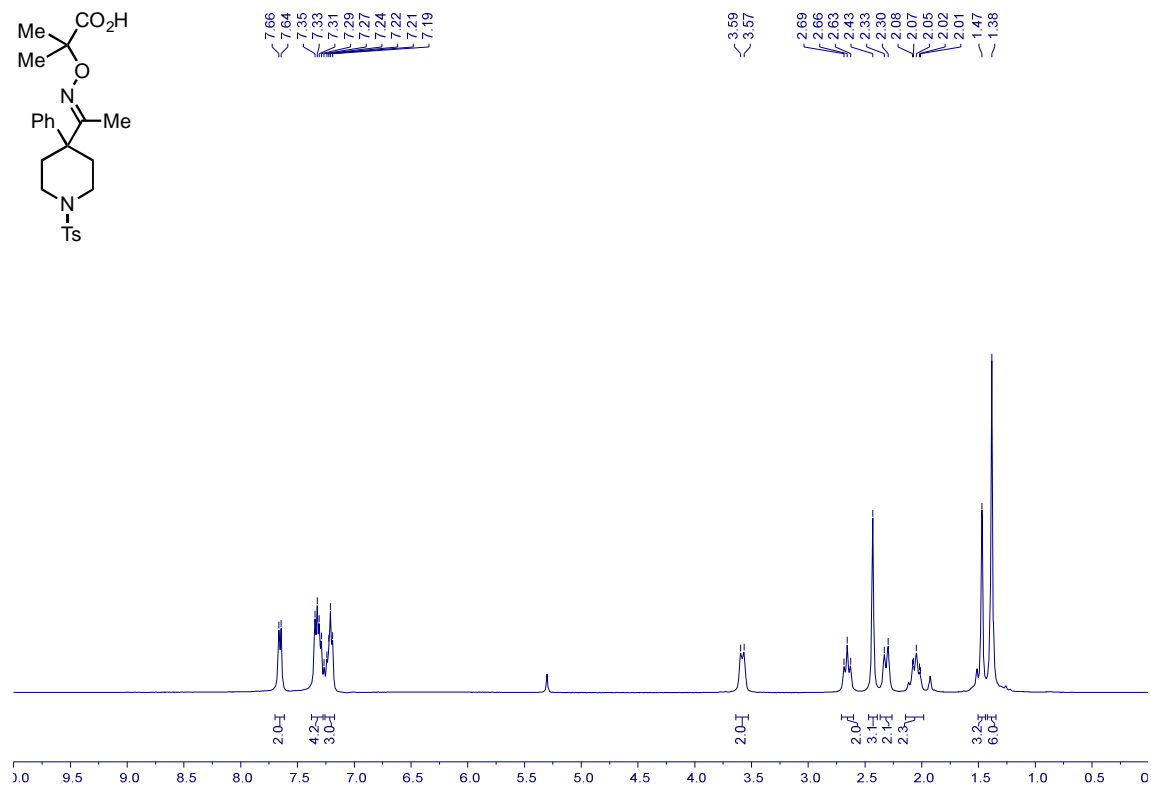

**1n**  $^{13}\text{C}$  NMR (101 MHz,  $\text{CDCl}_3$ )

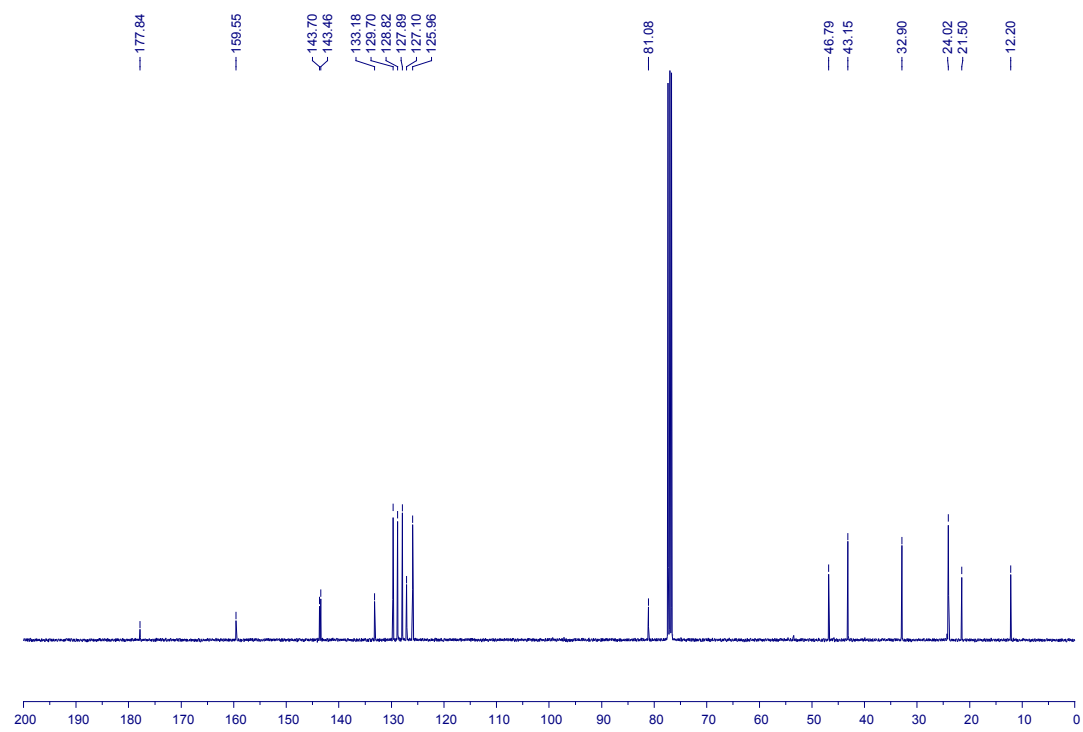

**1o**  $^1\text{H}$  NMR (400 MHz,  $\text{CDCl}_3$ )

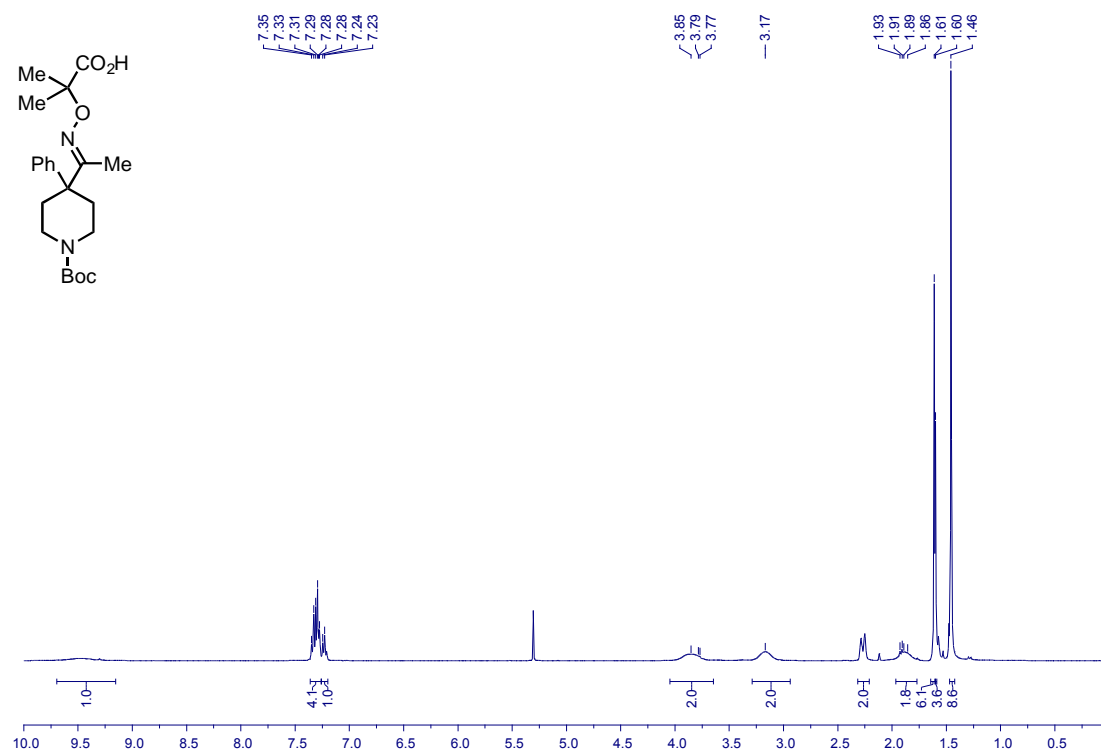

**1o**  $^{13}\text{C}$  NMR (101 MHz,  $\text{CDCl}_3$ )

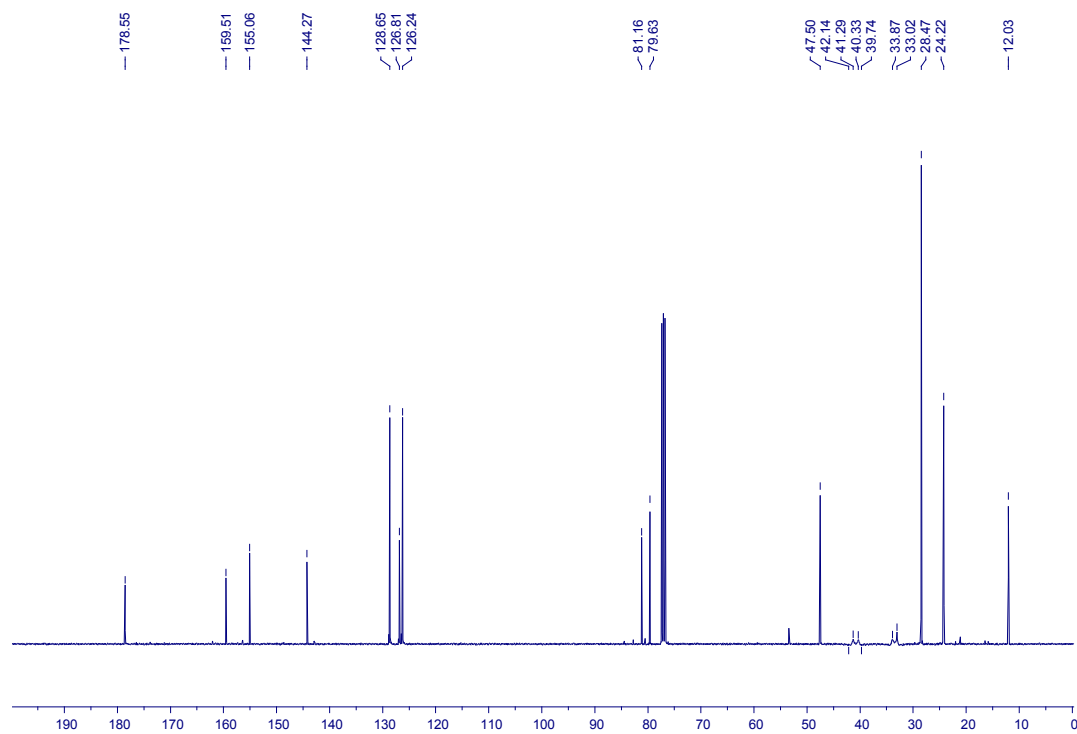

**1p**  $^1\text{H}$  NMR (400 MHz,  $\text{CDCl}_3$ )

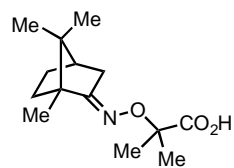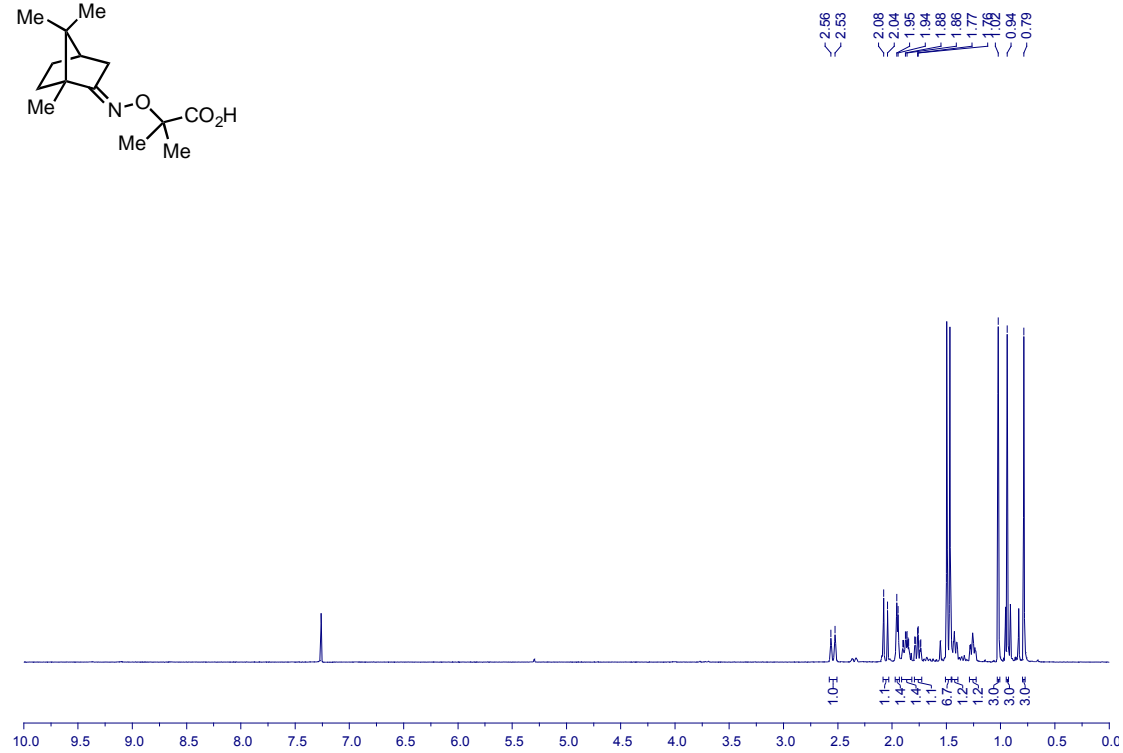

**1p**  $^{13}\text{C}$  NMR (101 MHz,  $\text{CDCl}_3$ )

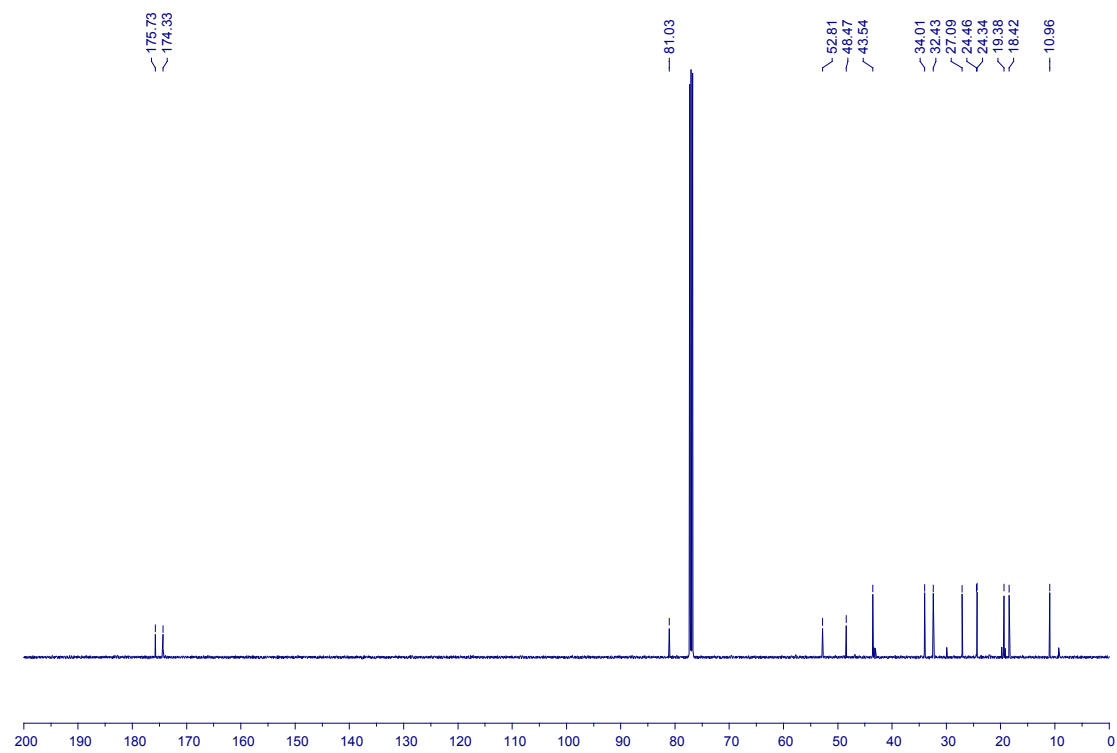

**1q**  $^1\text{H}$  NMR (400 MHz,  $\text{CDCl}_3$ )

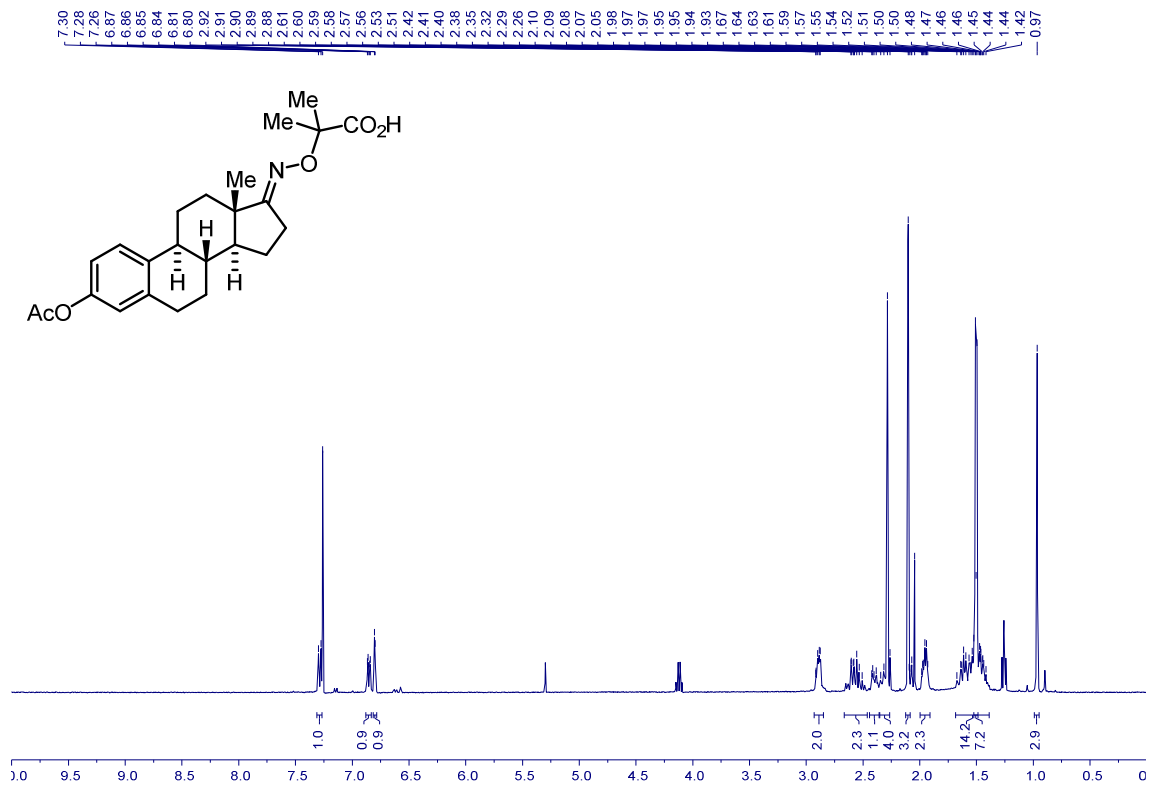

**1q**  $^{13}\text{C}$  NMR (101 MHz,  $\text{CDCl}_3$ )

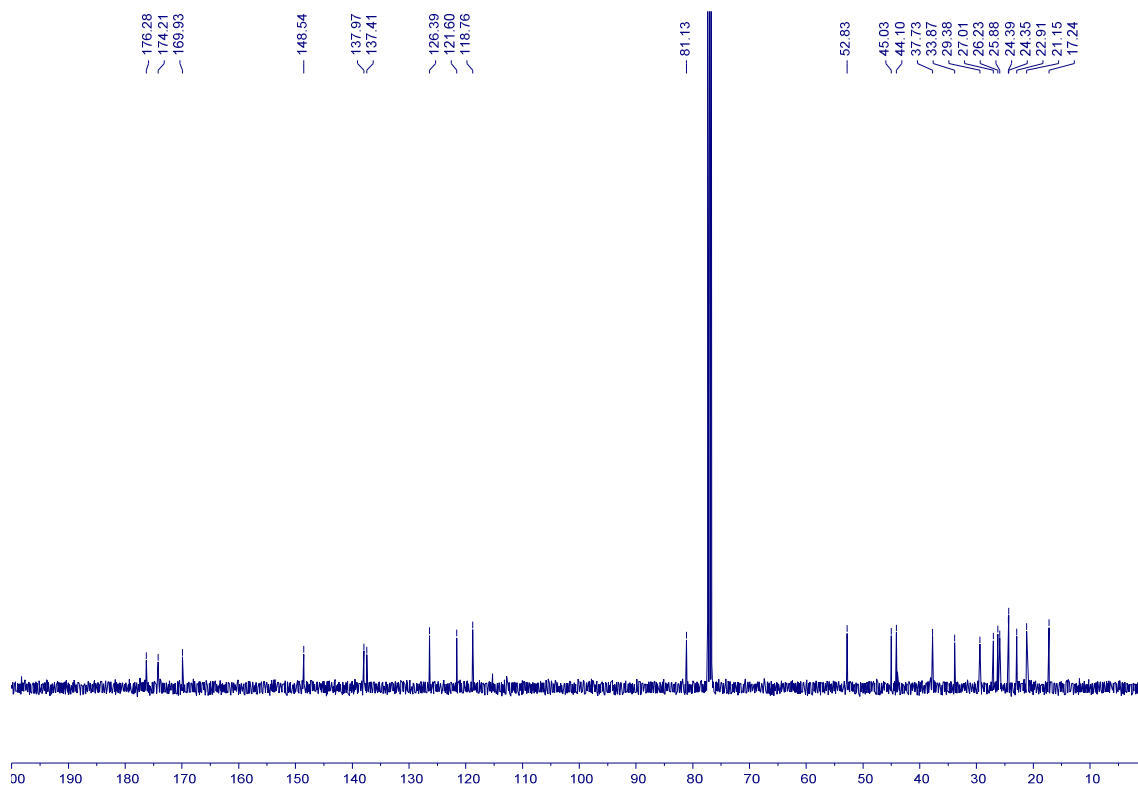

**1r**  $^1\text{H}$  NMR (400 MHz,  $\text{CDCl}_3$ )

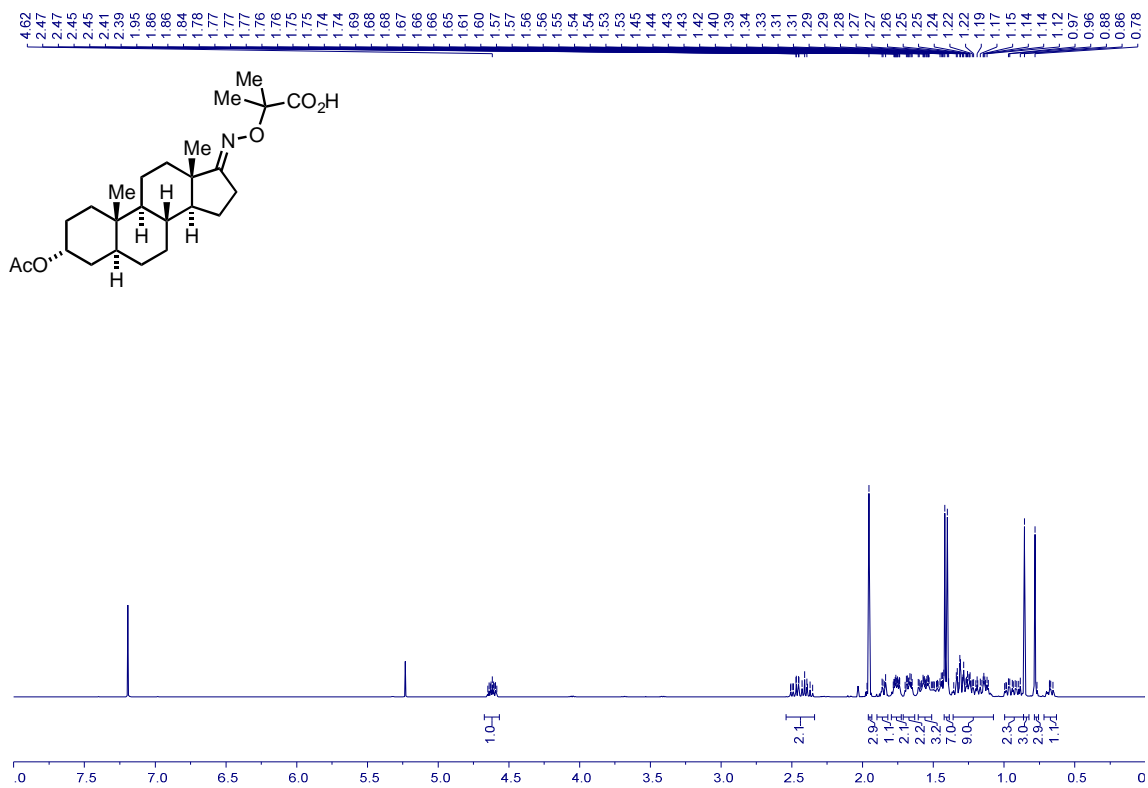

**1r**  $^{13}\text{C}$  NMR (101 MHz,  $\text{CDCl}_3$ )

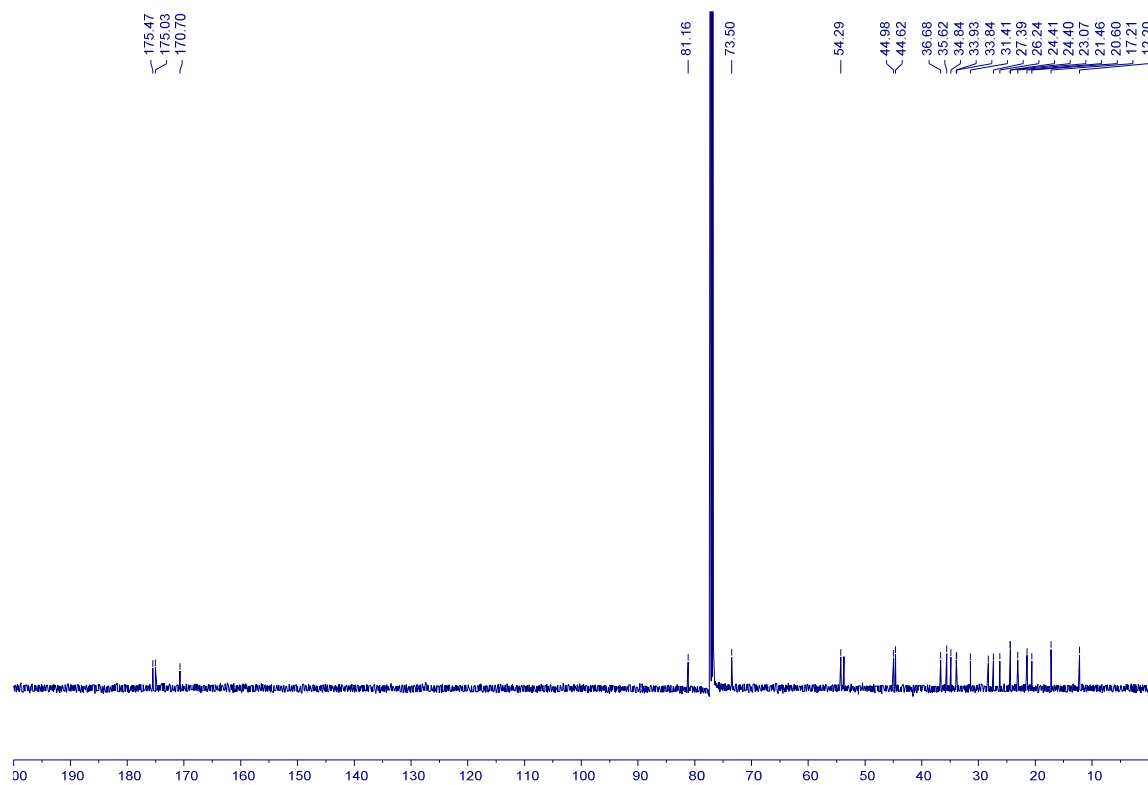

**1s**  $^1\text{H}$  NMR (400 MHz,  $\text{CDCl}_3$ )

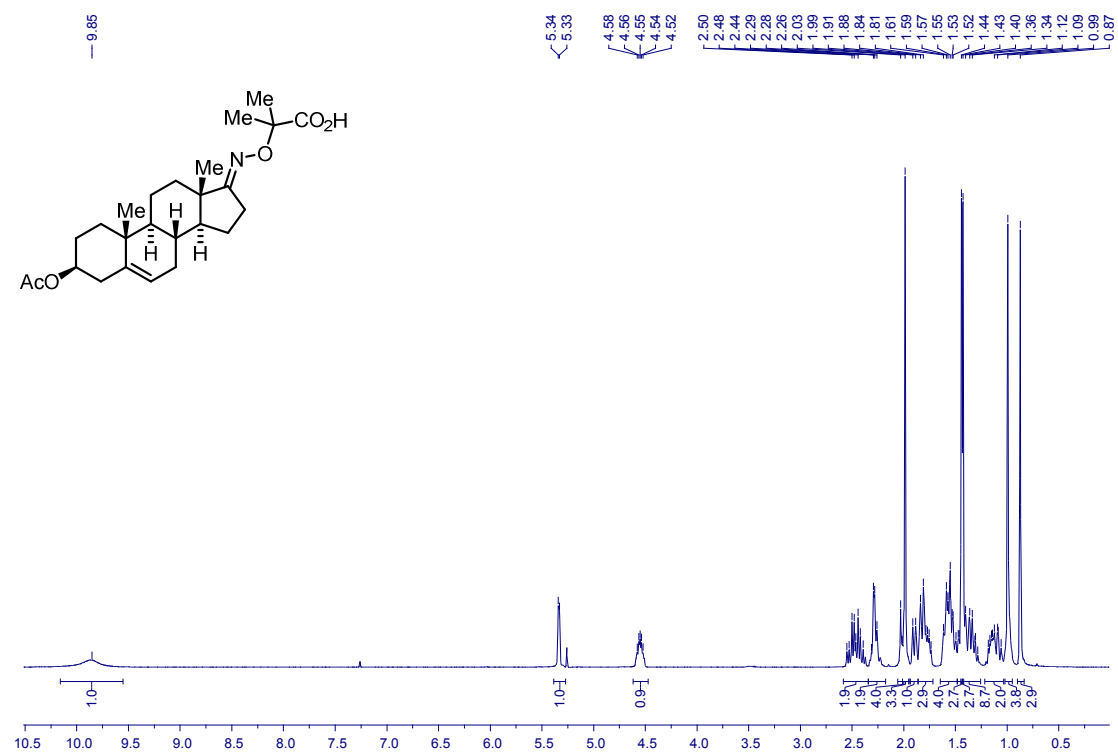

**1s**  $^{13}\text{C}$  NMR (101 MHz,  $\text{CDCl}_3$ )

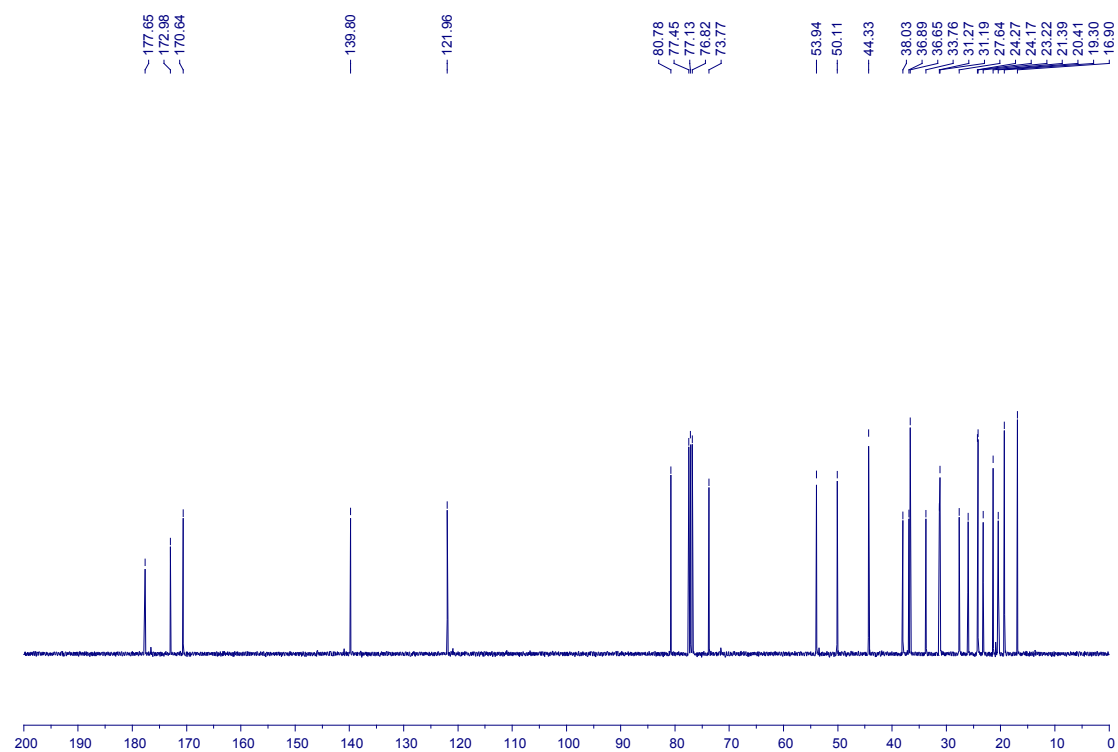

**1t**  $^1\text{H}$  NMR (400 MHz,  $\text{CDCl}_3$ )

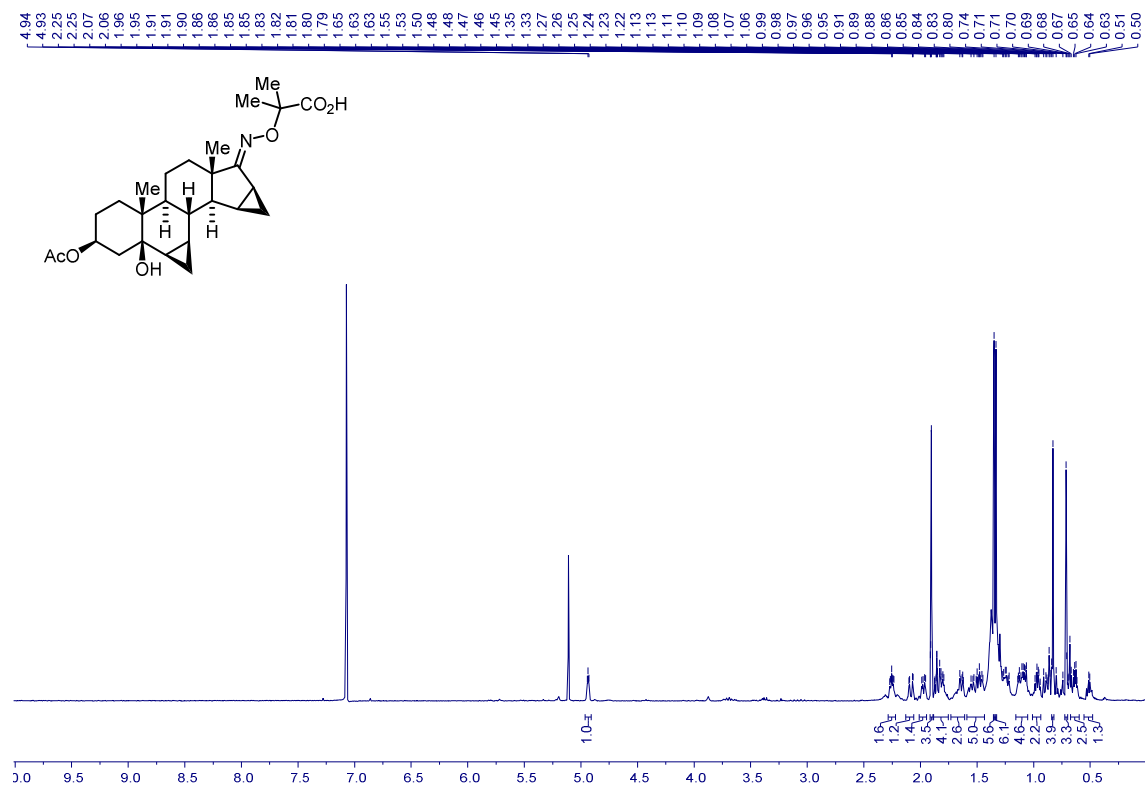

**1t**  $^{13}\text{C}$  NMR (101 MHz,  $\text{CDCl}_3$ )

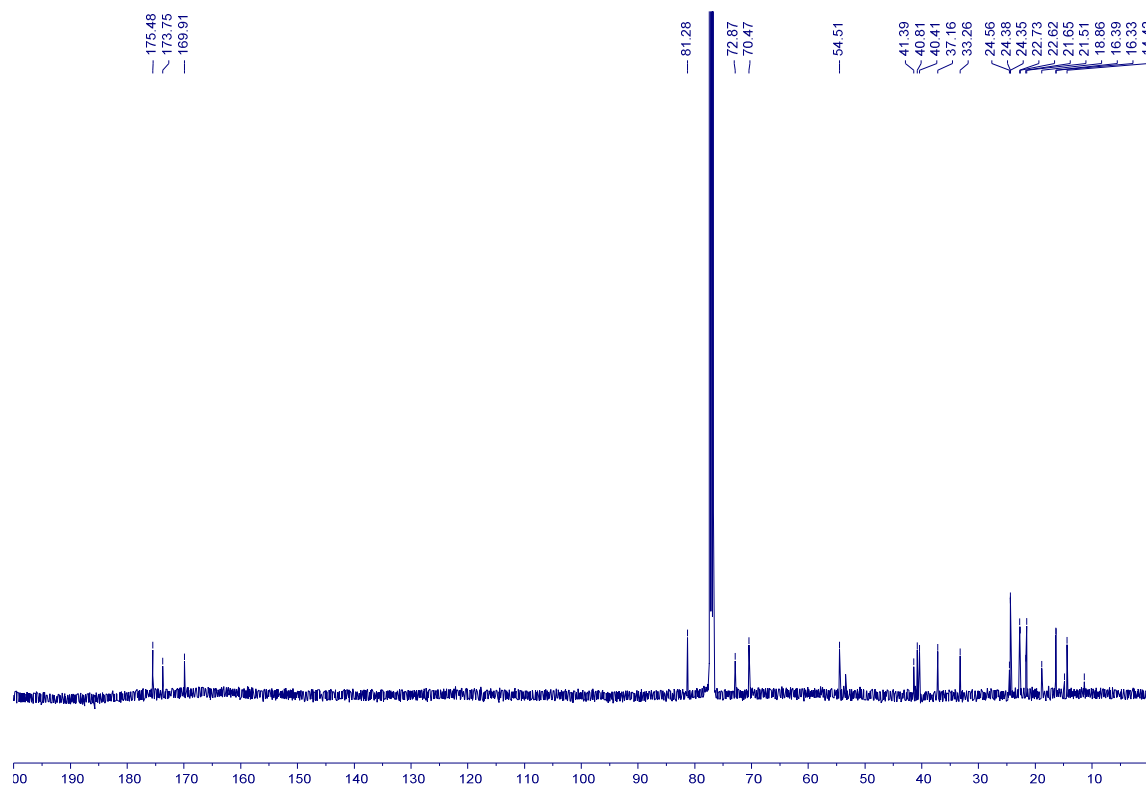

**1u**  $^1\text{H}$  NMR (400 MHz,  $\text{CDCl}_3$ )

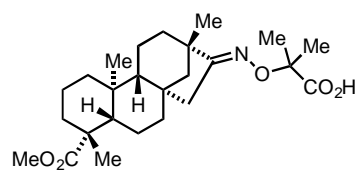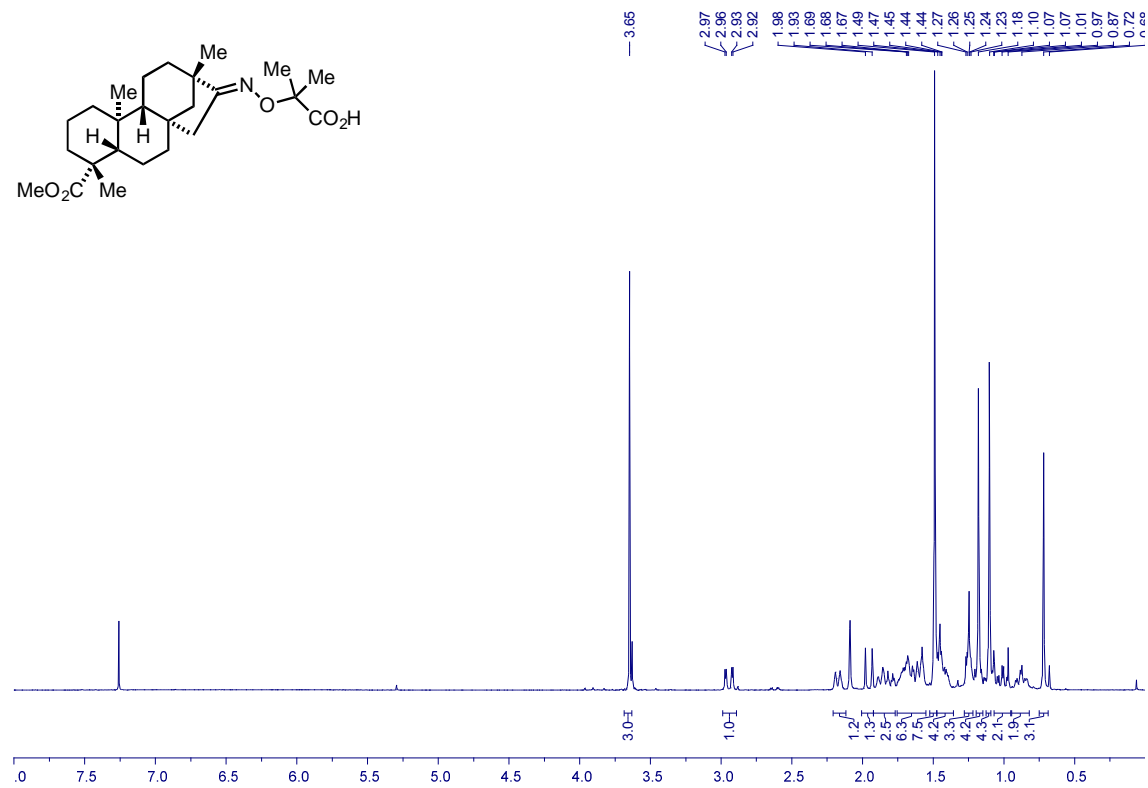

**1u**  $^{13}\text{C}$  NMR (101 MHz,  $\text{CDCl}_3$ )

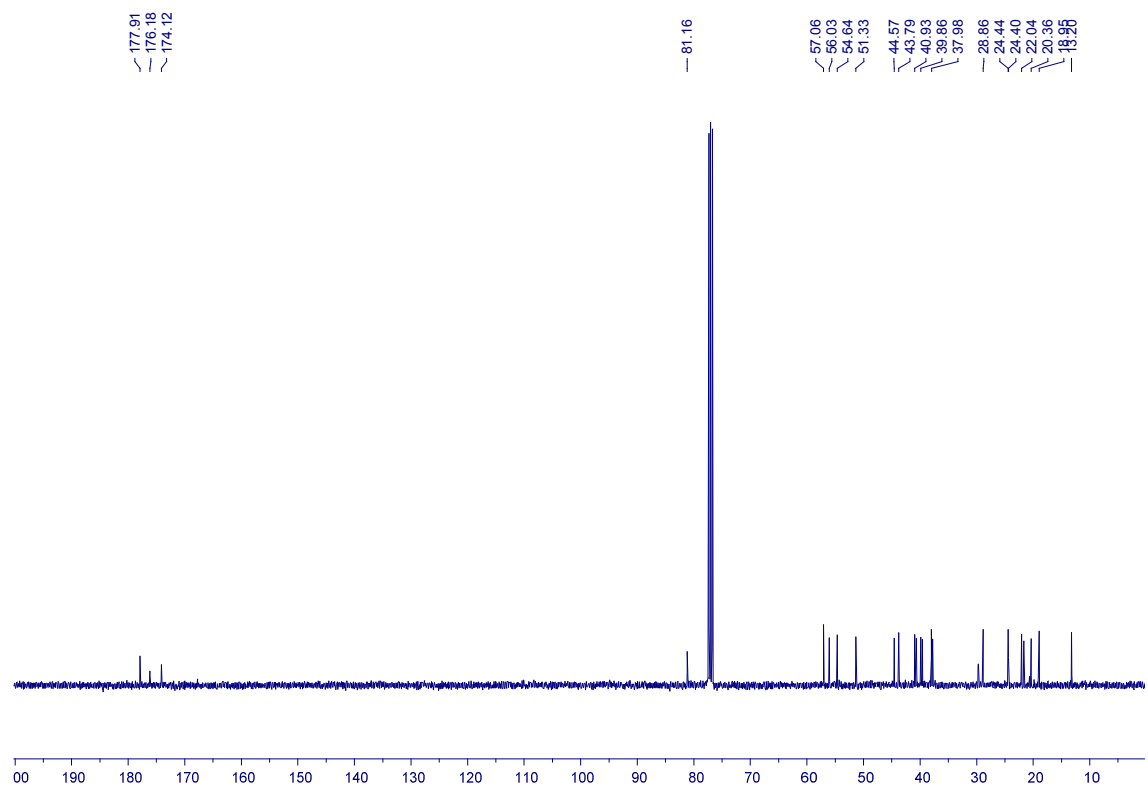



**6a**  $^1\text{H}$  NMR (400 MHz,  $\text{CDCl}_3$ )

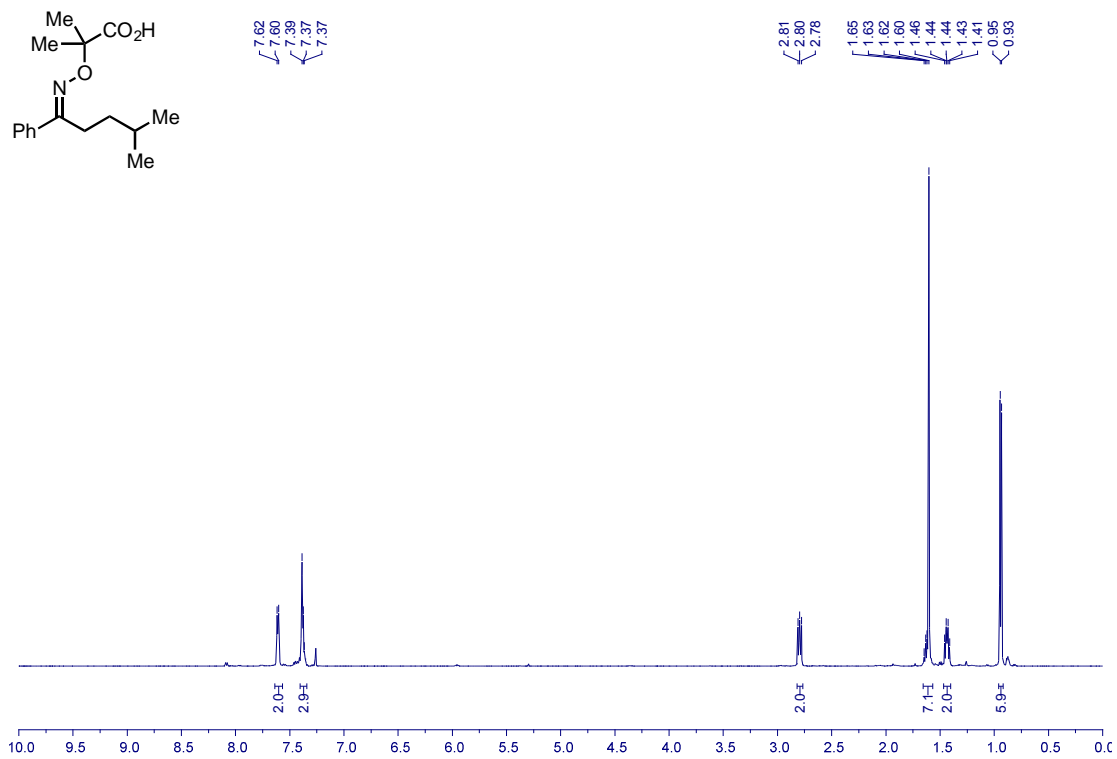

**6a**  $^{13}\text{C}$  NMR (101 MHz,  $\text{CDCl}_3$ )

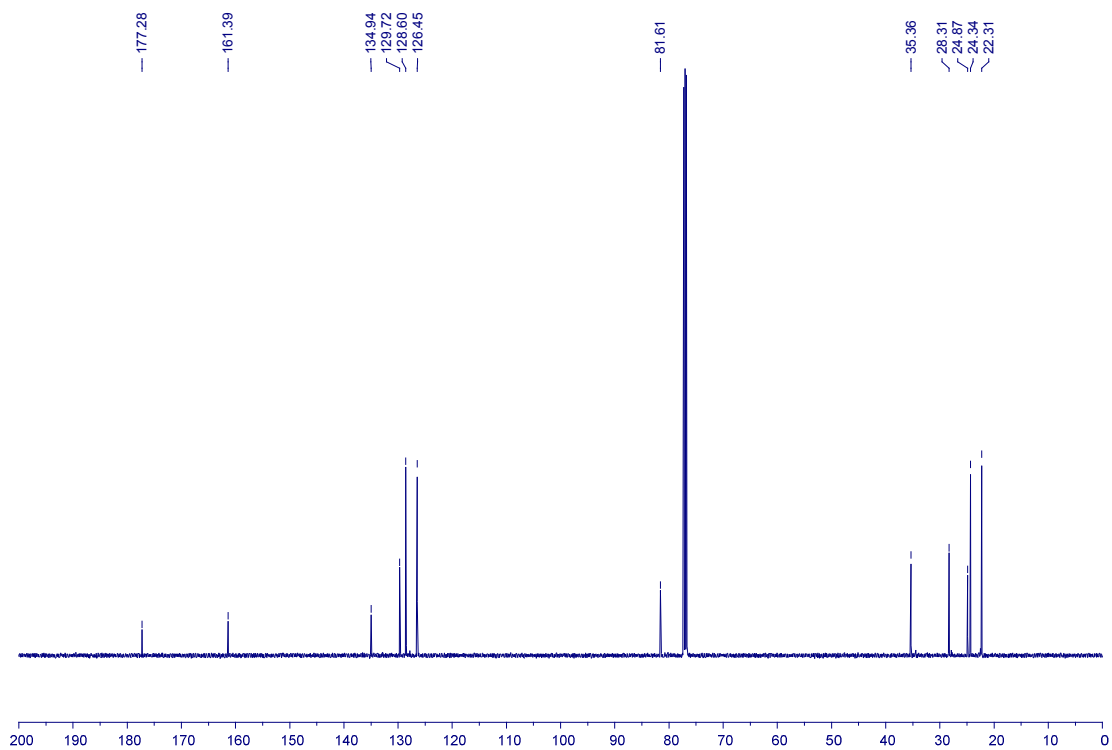

**6b**  $^1\text{H}$  NMR (400 MHz,  $\text{CDCl}_3$ )

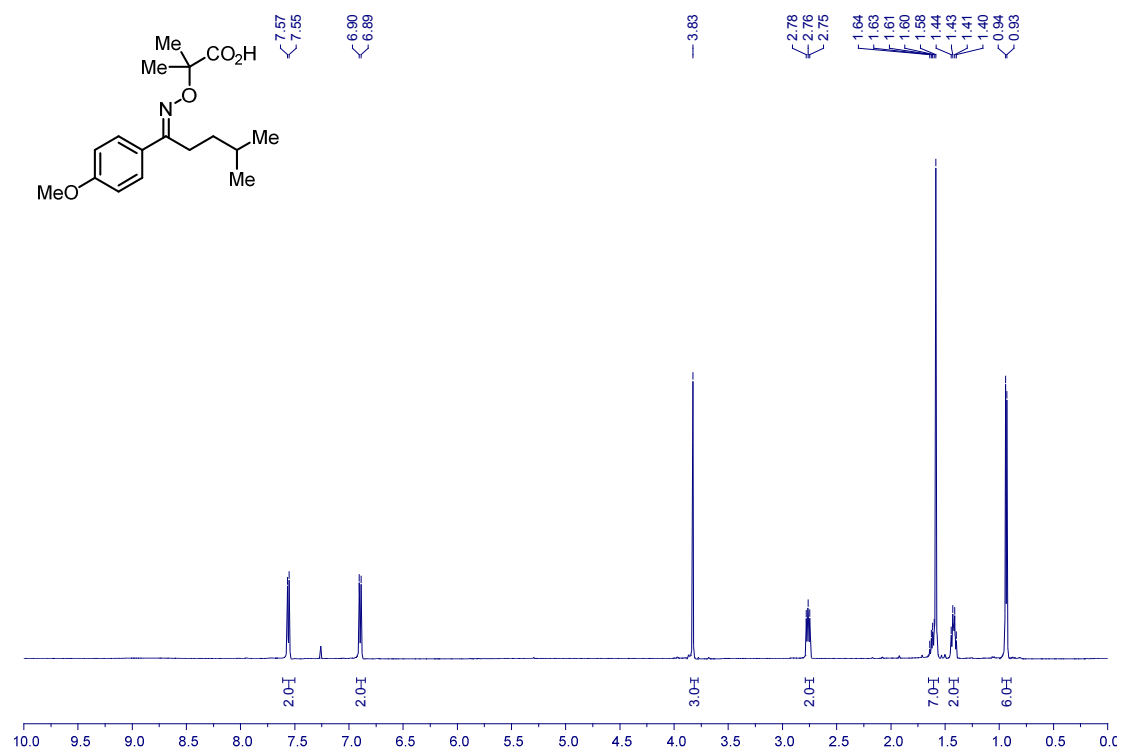

**6b**  $^{13}\text{C}$  NMR (101 MHz,  $\text{CDCl}_3$ )

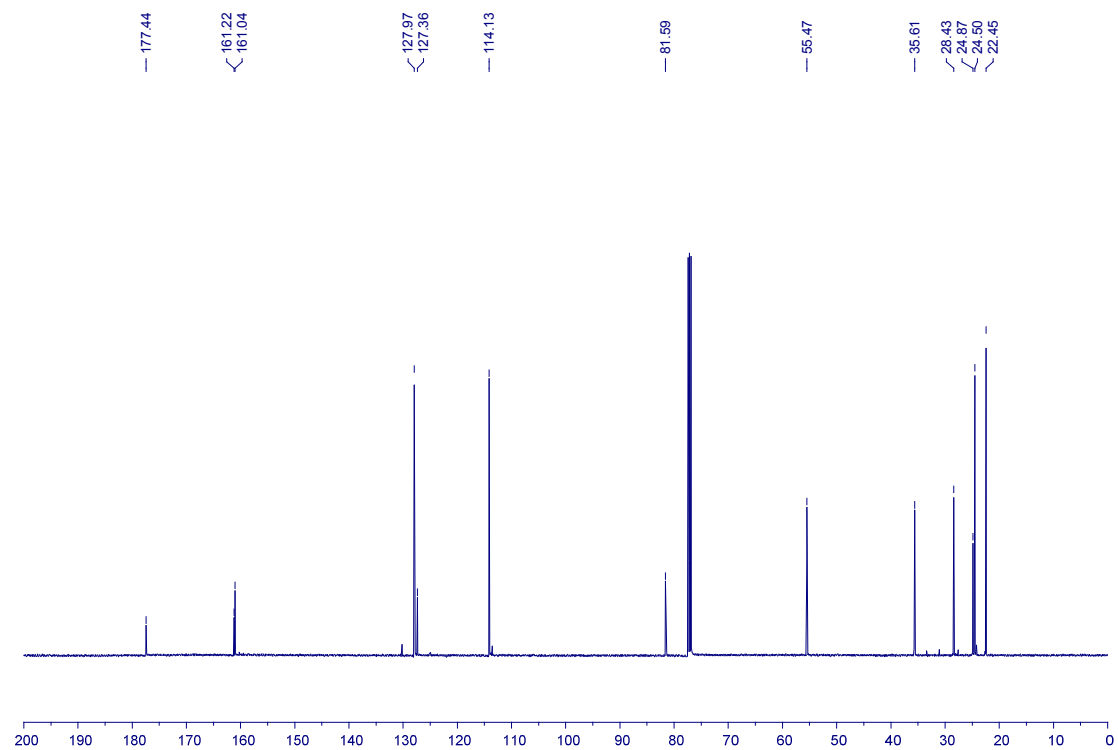

**6c**  $^1\text{H}$  NMR (400 MHz,  $\text{CDCl}_3$ )

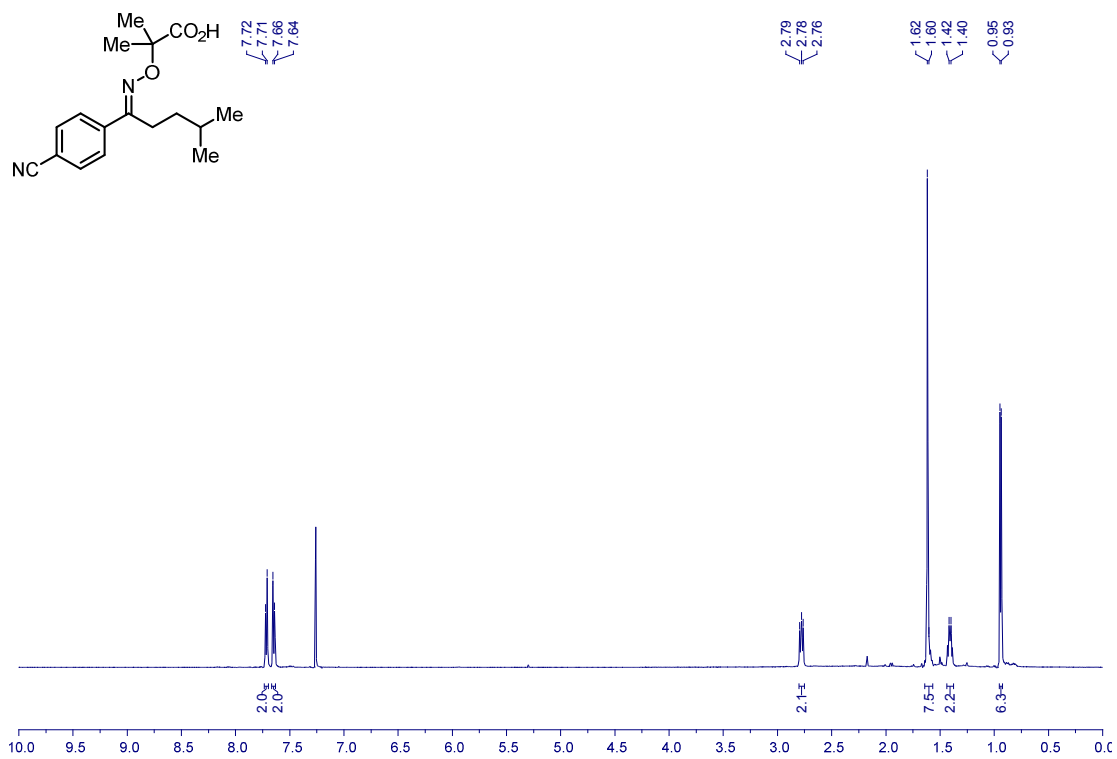

**6c**  $^{13}\text{C}$  NMR (101 MHz,  $\text{CDCl}_3$ )

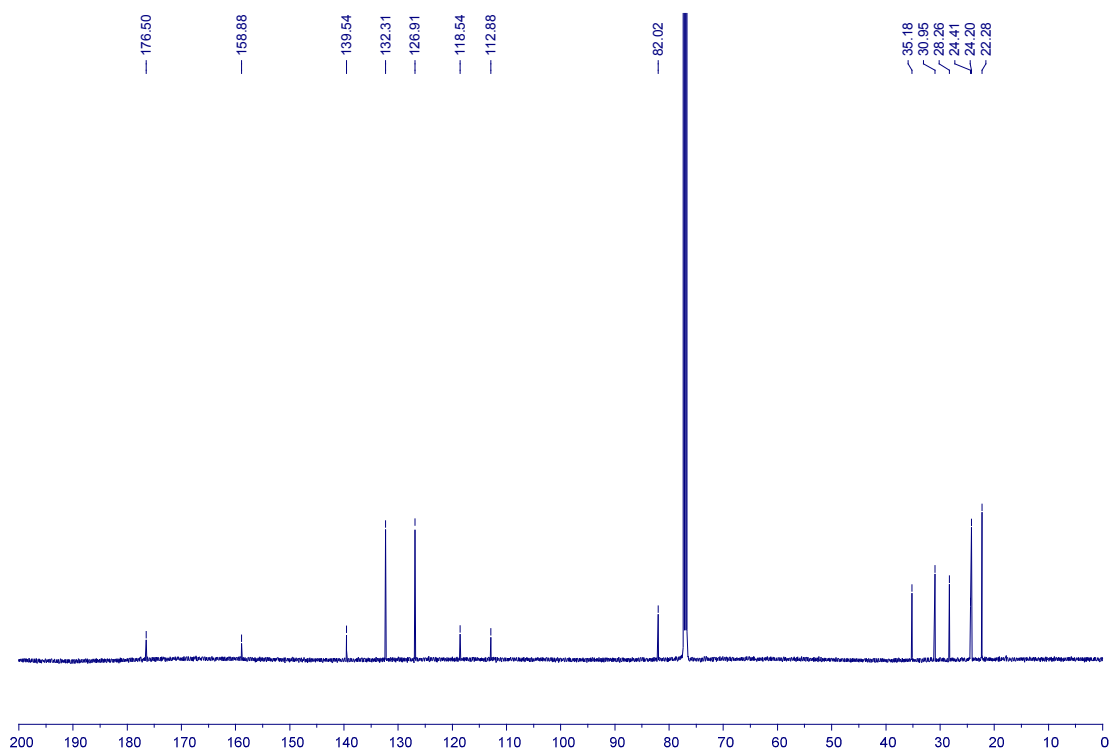

**6d**  $^1\text{H}$  NMR (400 MHz,  $\text{CDCl}_3$ )

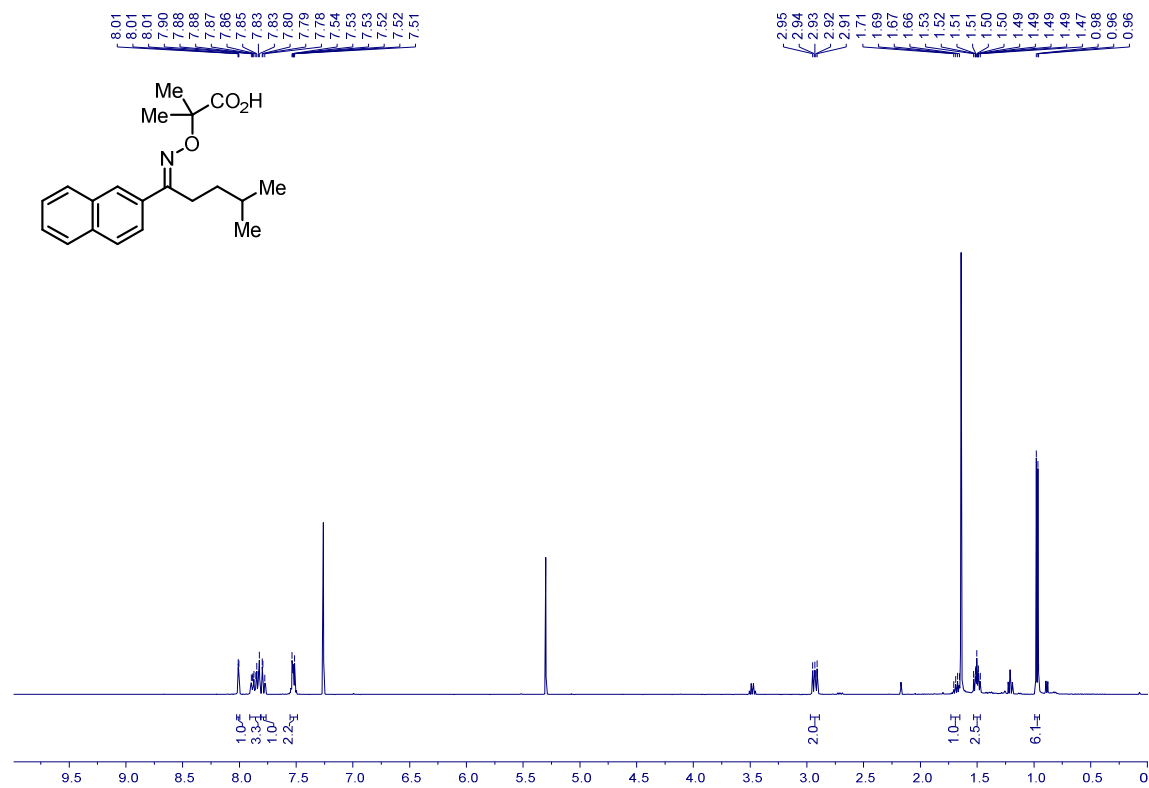

**6d**  $^{13}\text{C}$  NMR (101 MHz,  $\text{CDCl}_3$ )

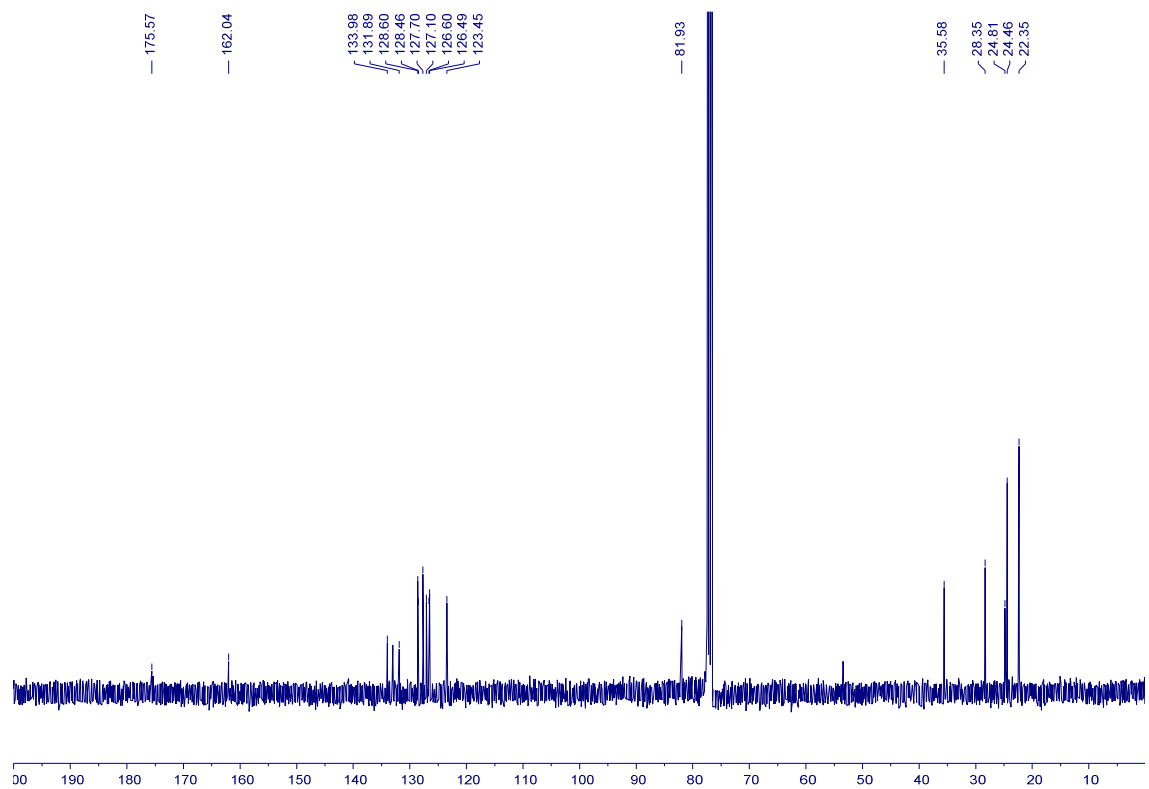

**6e**  $^1\text{H}$  NMR (400 MHz,  $\text{CDCl}_3$ )

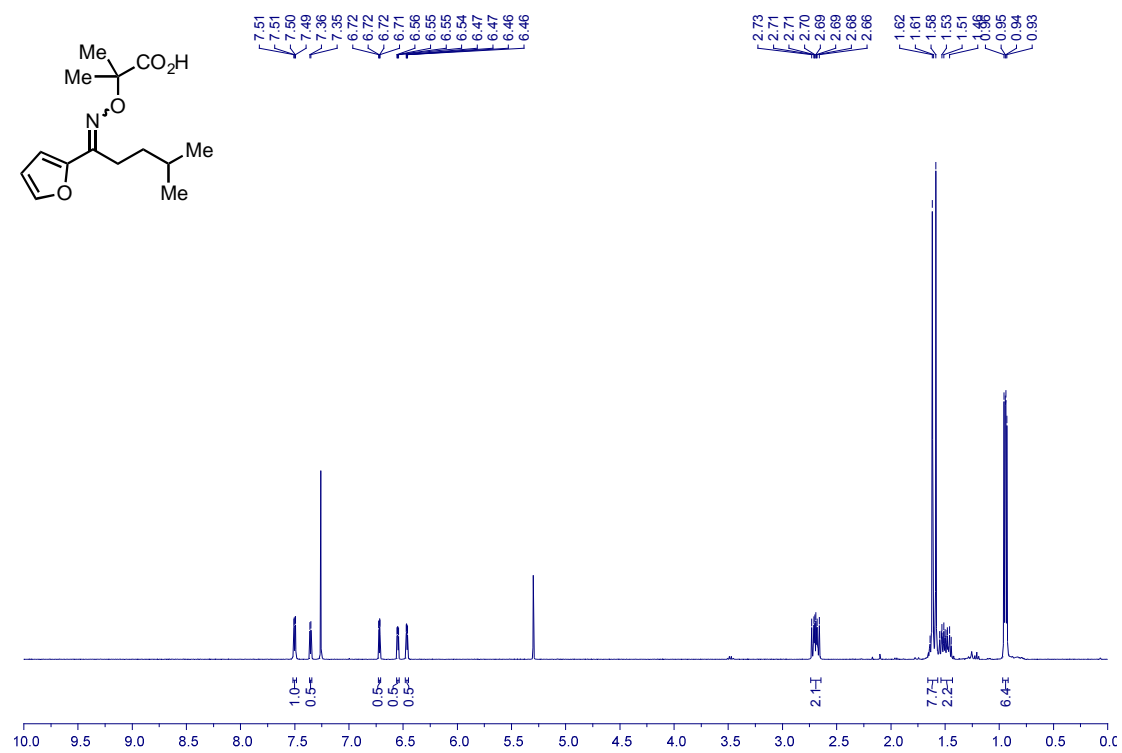

**6e**  $^{13}\text{C}$  NMR (101 MHz,  $\text{CDCl}_3$ )

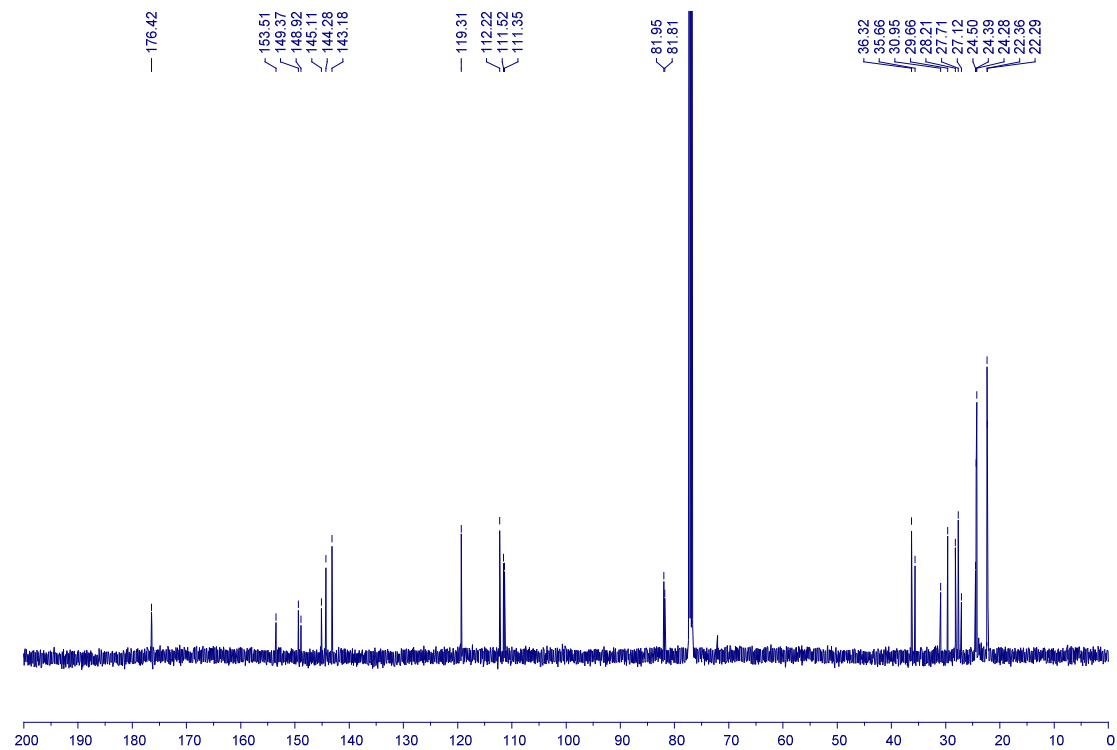

**6f**  $^1\text{H}$  NMR (400 MHz,  $\text{CDCl}_3$ )

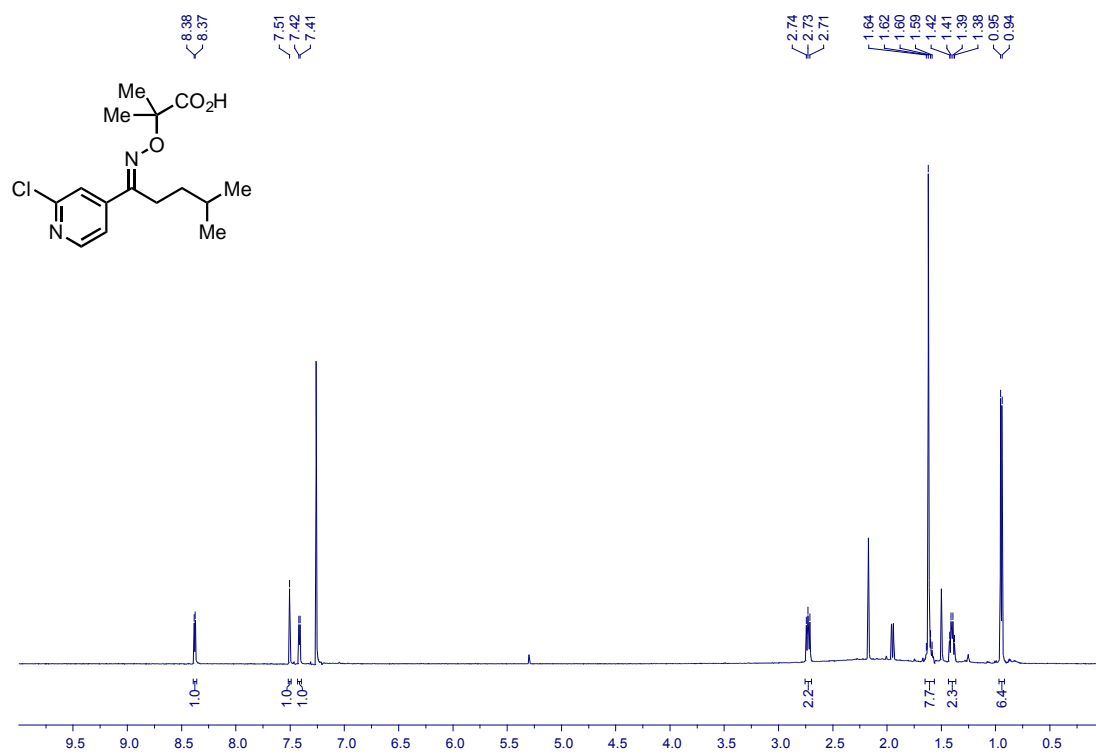

**6f**  $^{13}\text{C}$  NMR (101 MHz,  $\text{CDCl}_3$ )

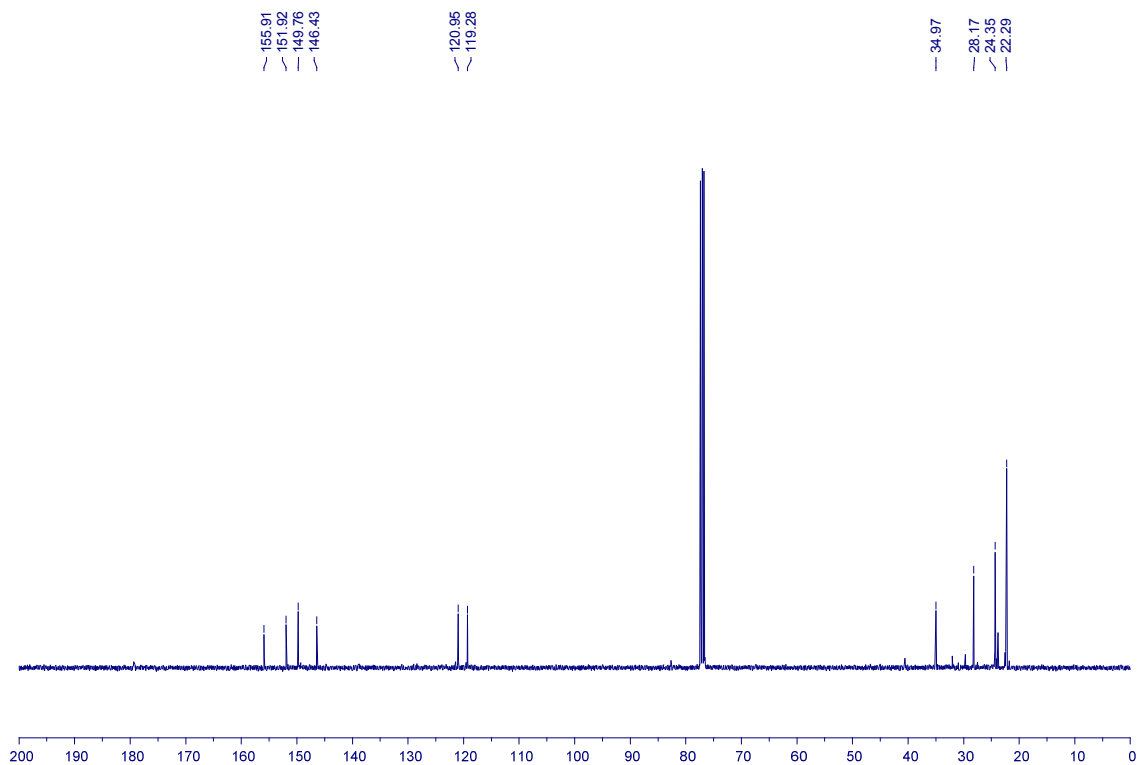

**6g**  $^1\text{H}$  NMR (400 MHz,  $\text{CDCl}_3$ )

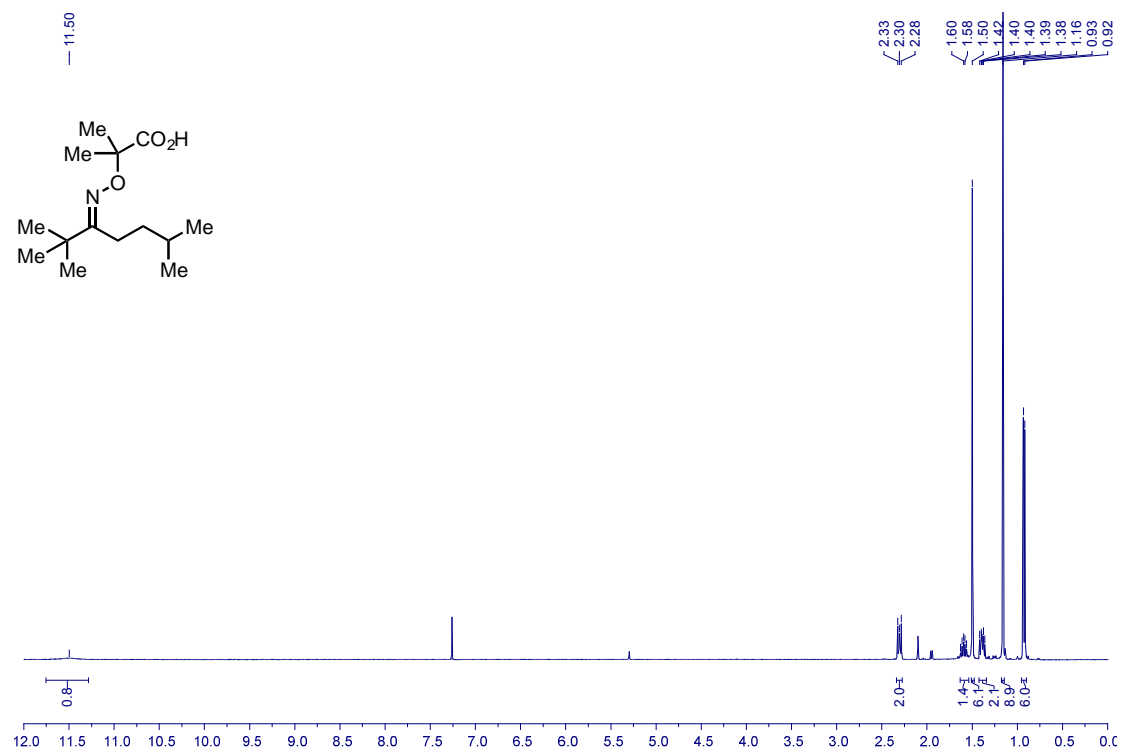

**5g**  $^{13}\text{C}$  NMR (101 MHz,  $\text{CDCl}_3$ )

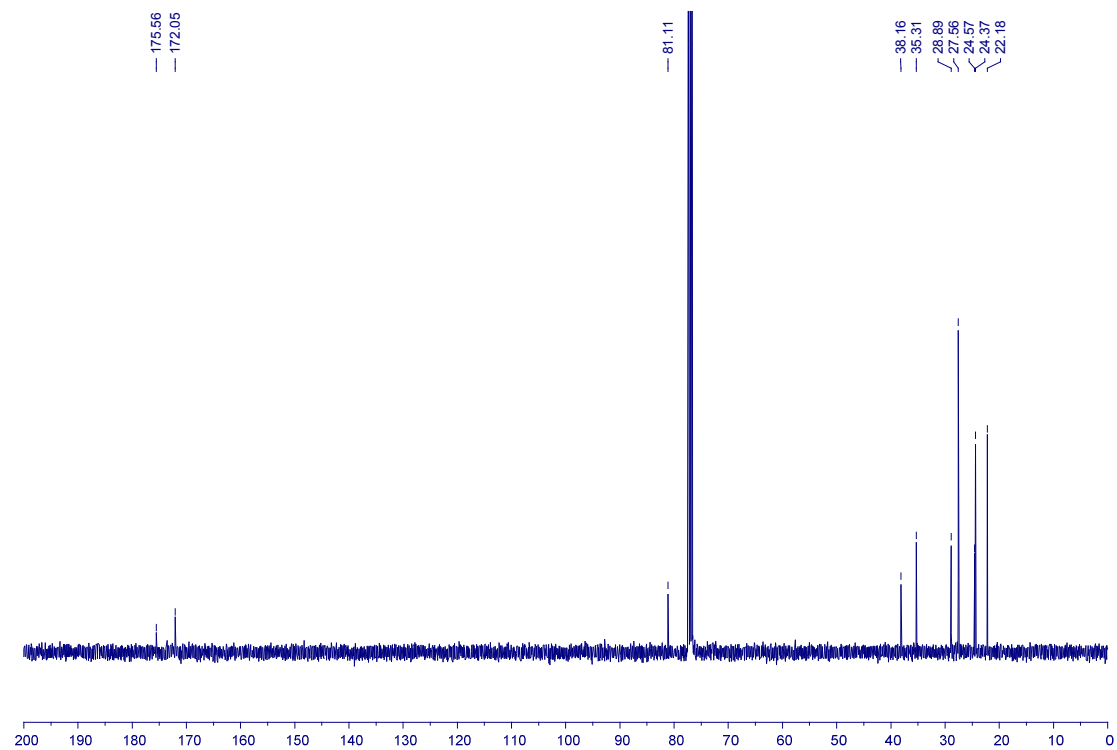

**6h**  $^1\text{H}$  NMR (400 MHz,  $\text{CDCl}_3$ )

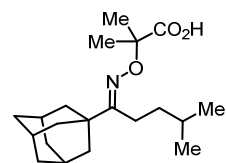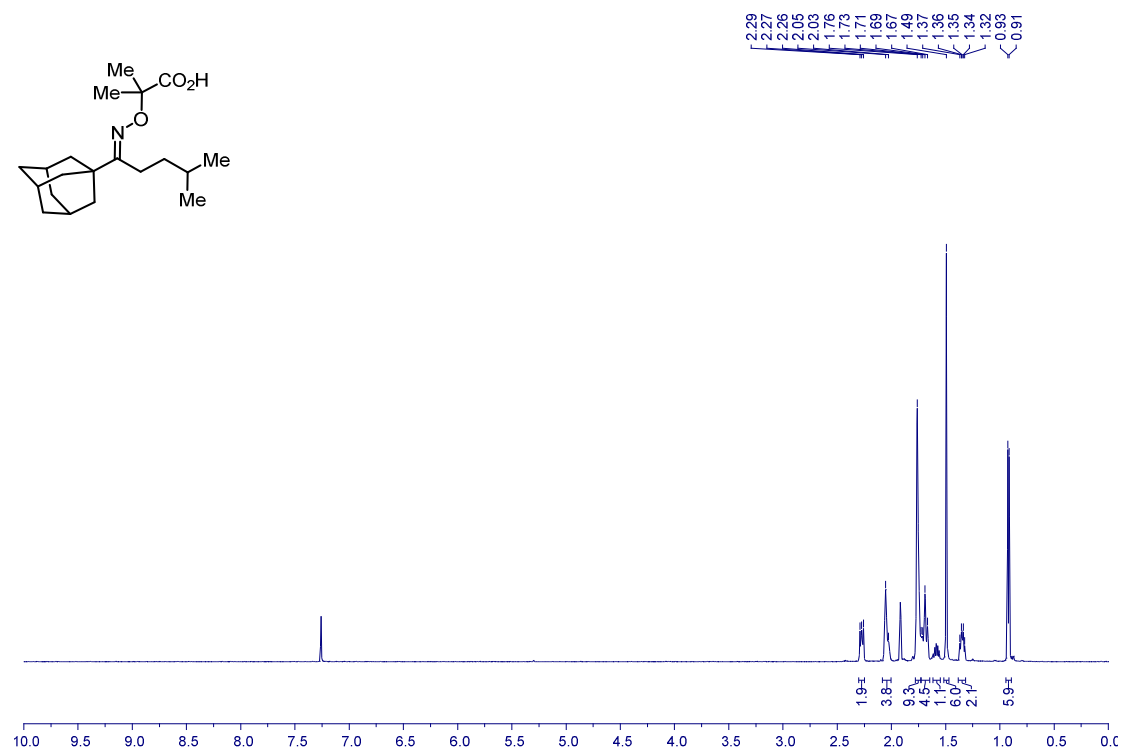

**6h**  $^{13}\text{C}$  NMR (101 MHz,  $\text{CDCl}_3$ )

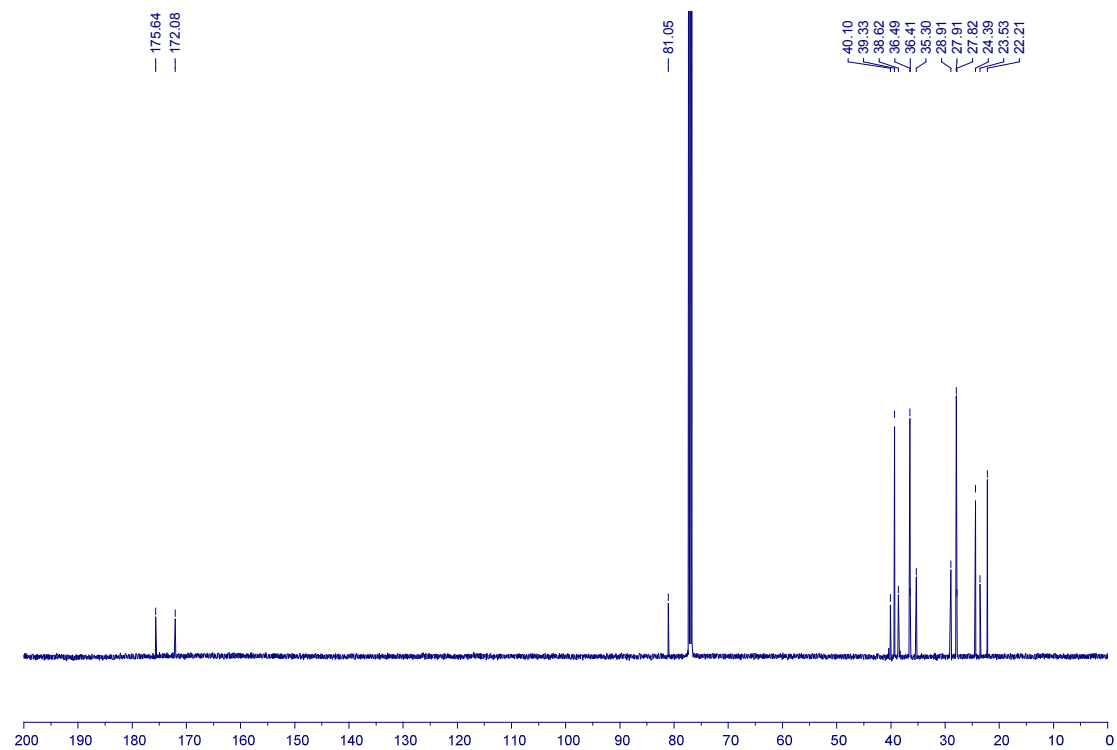



**6i**  $^1\text{H}$  NMR (500 MHz,  $\text{CDCl}_3$ )

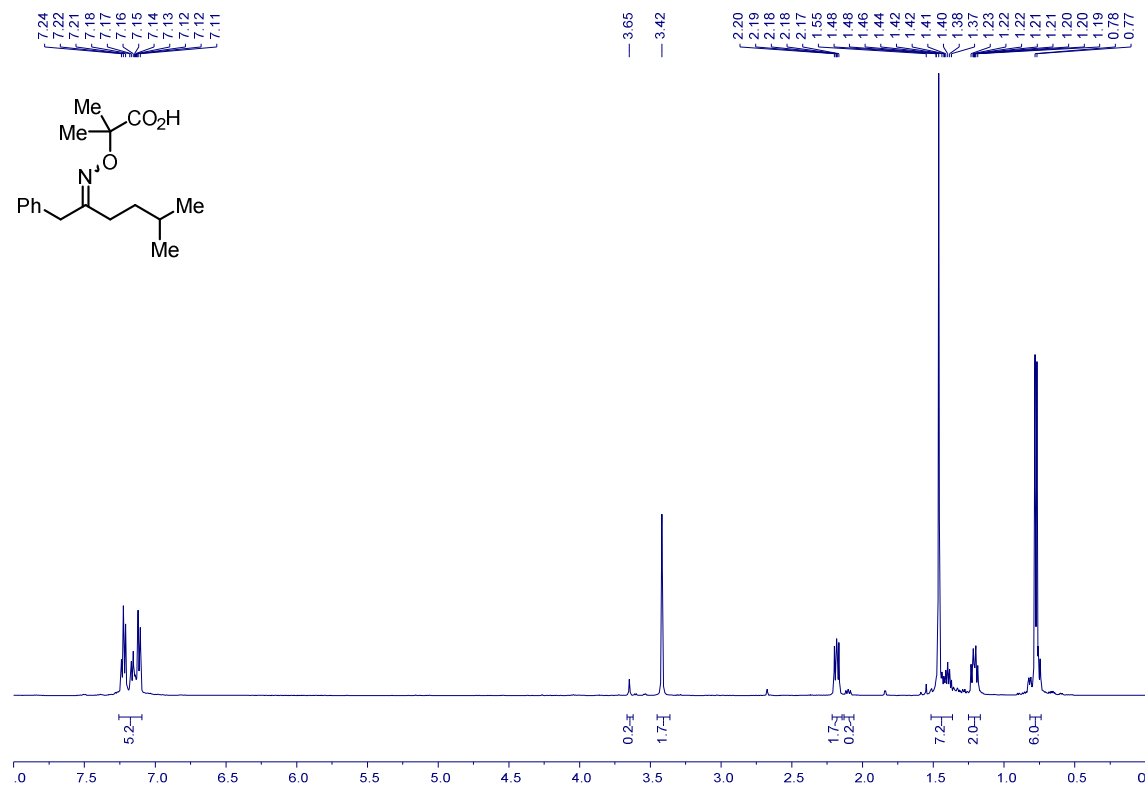

**6i**  $^{13}\text{C}$  NMR (101 MHz,  $\text{CDCl}_3$ )

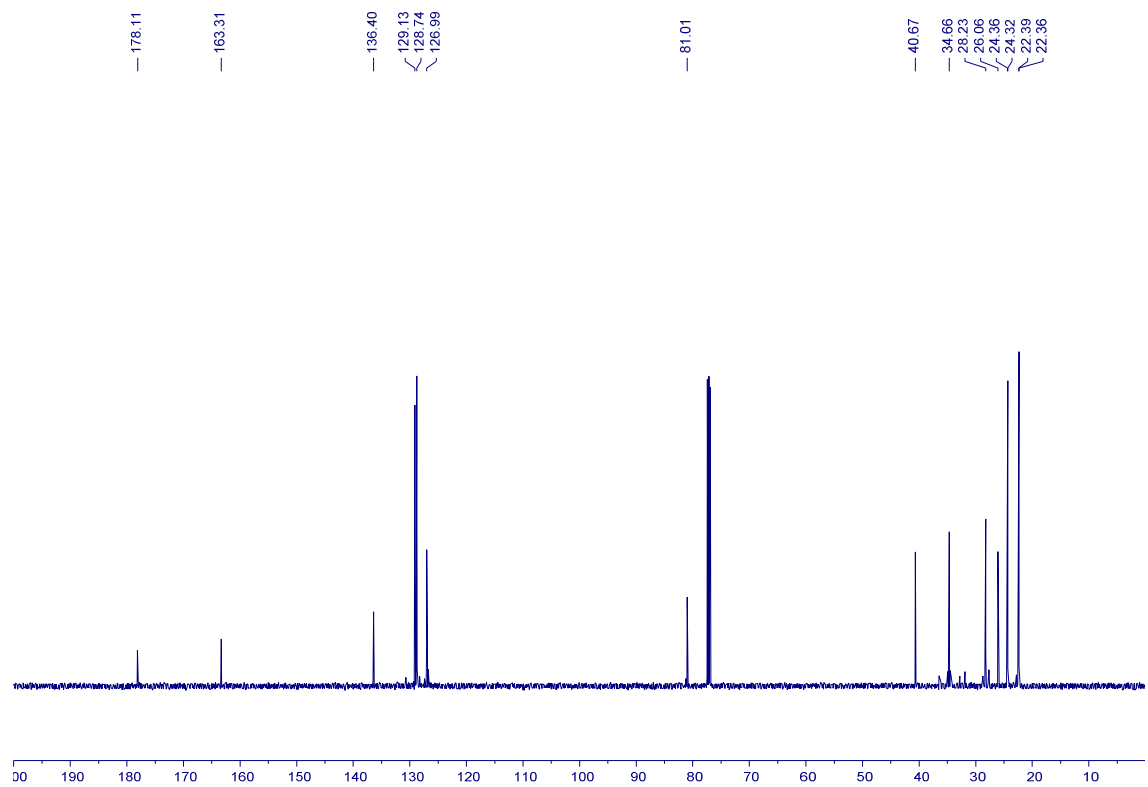

**6j**  $^1\text{H}$  NMR (400 MHz,  $\text{CDCl}_3$ )

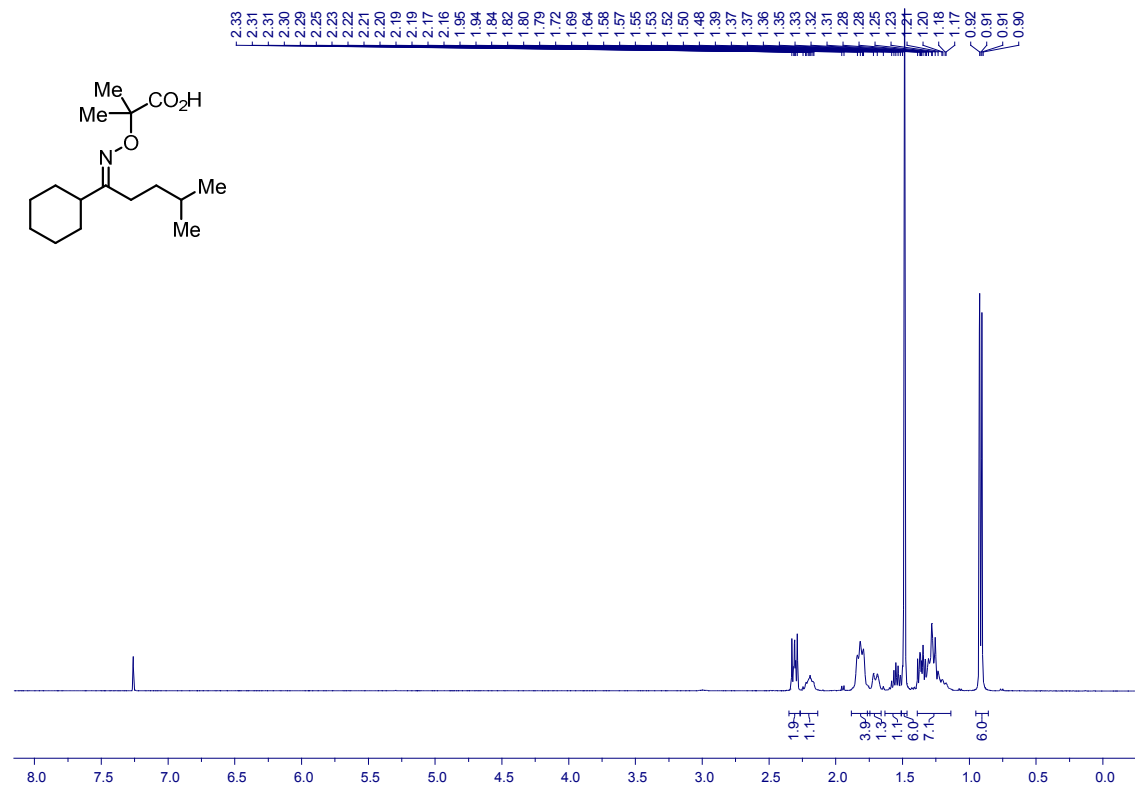

**6j**  $^{13}\text{C}$  NMR (101 MHz,  $\text{CDCl}_3$ )

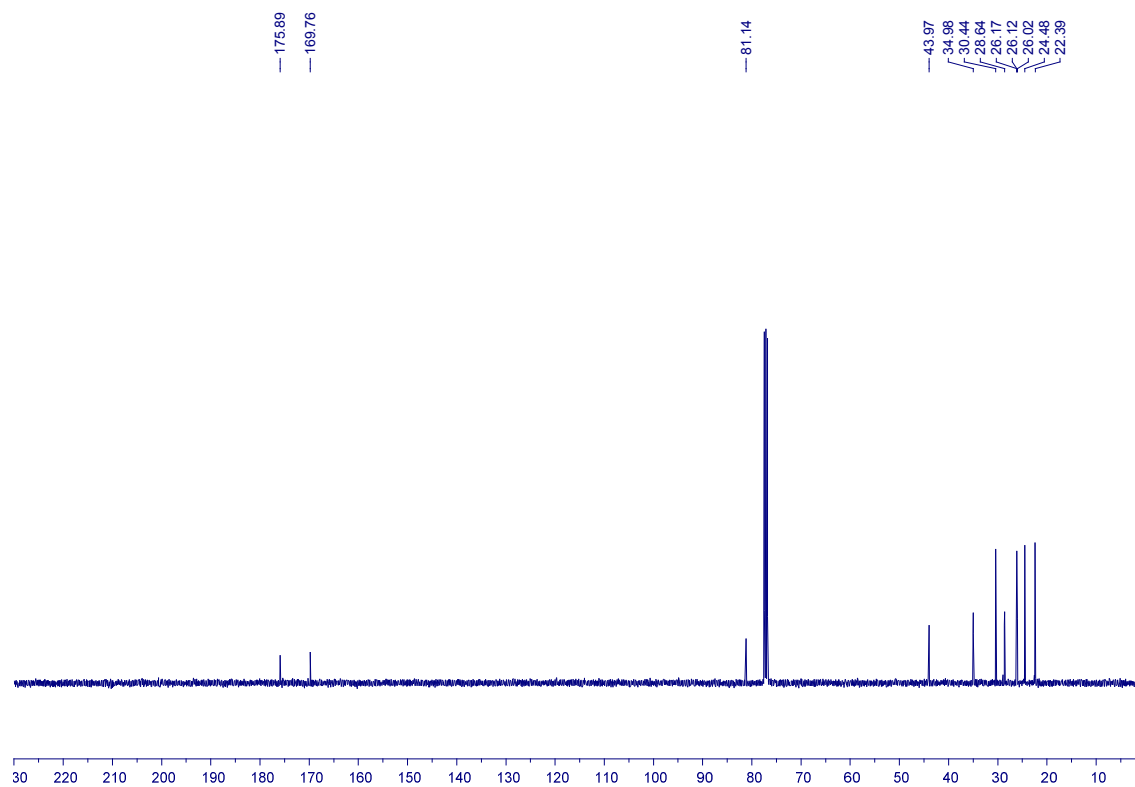

**6k**  $^1\text{H}$  NMR (400 MHz,  $\text{CDCl}_3$ )

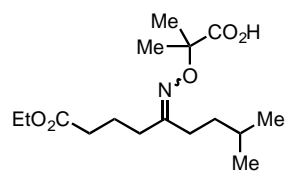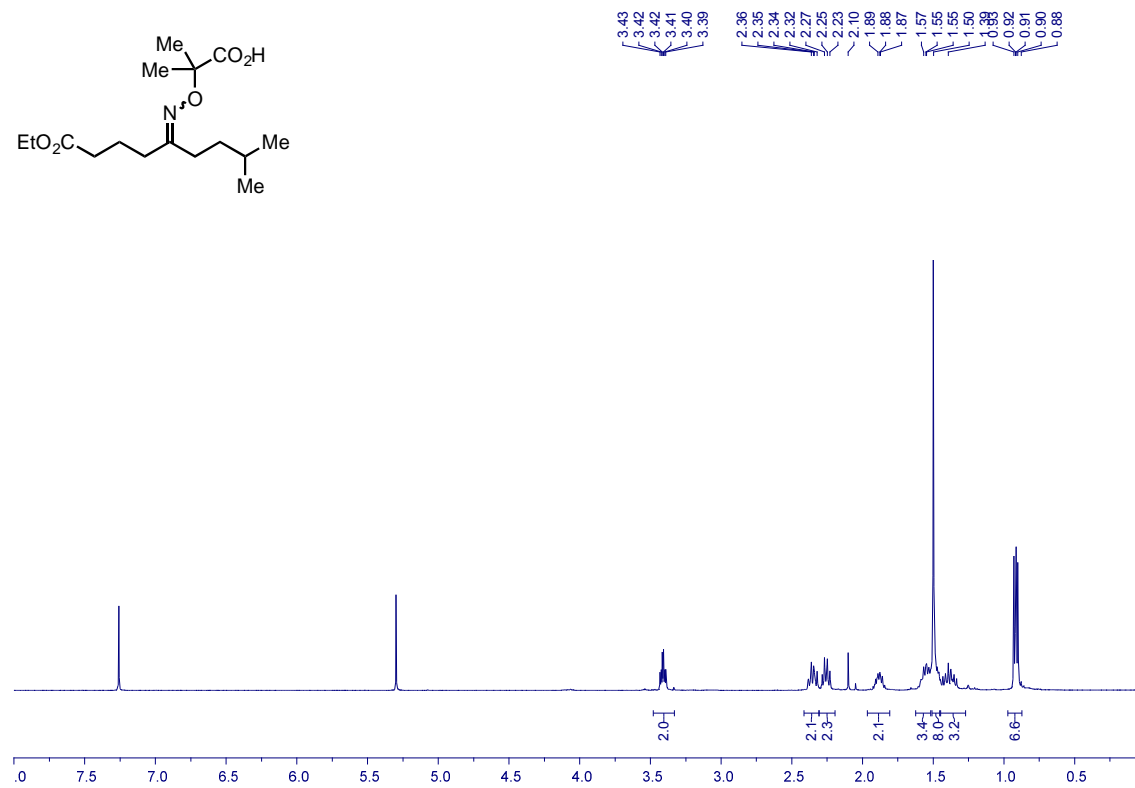

**6k**  $^{13}\text{C}$  NMR (126 MHz,  $\text{CDCl}_3$ )

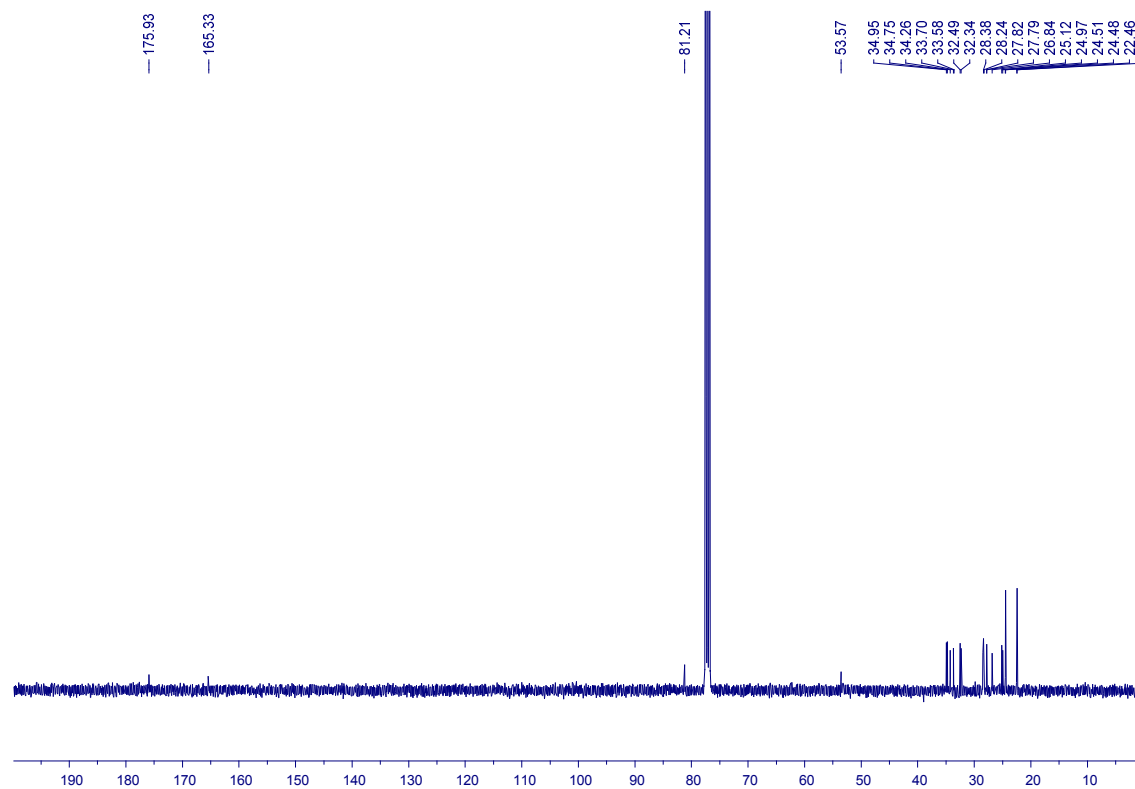

**6l**  $^1\text{H}$  NMR (400 MHz,  $\text{CDCl}_3$ )

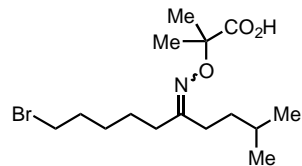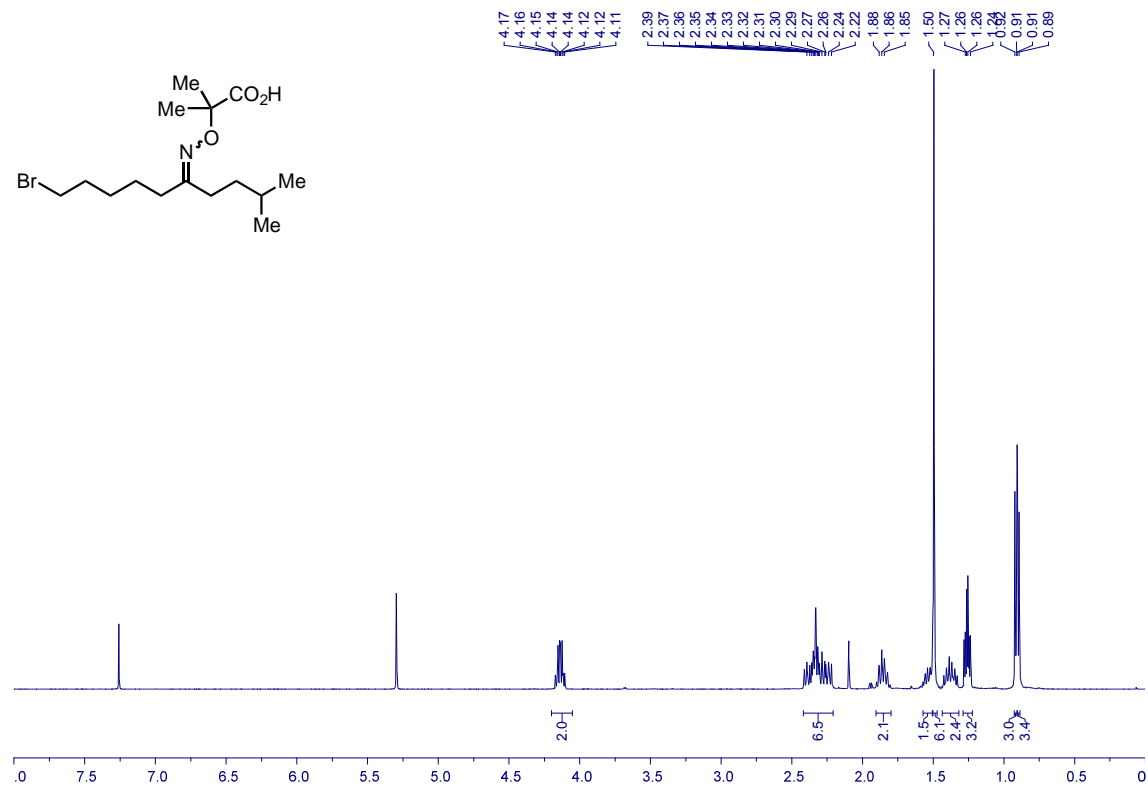

**6l**  $^{13}\text{C}$  NMR (126 MHz,  $\text{CDCl}_3$ )

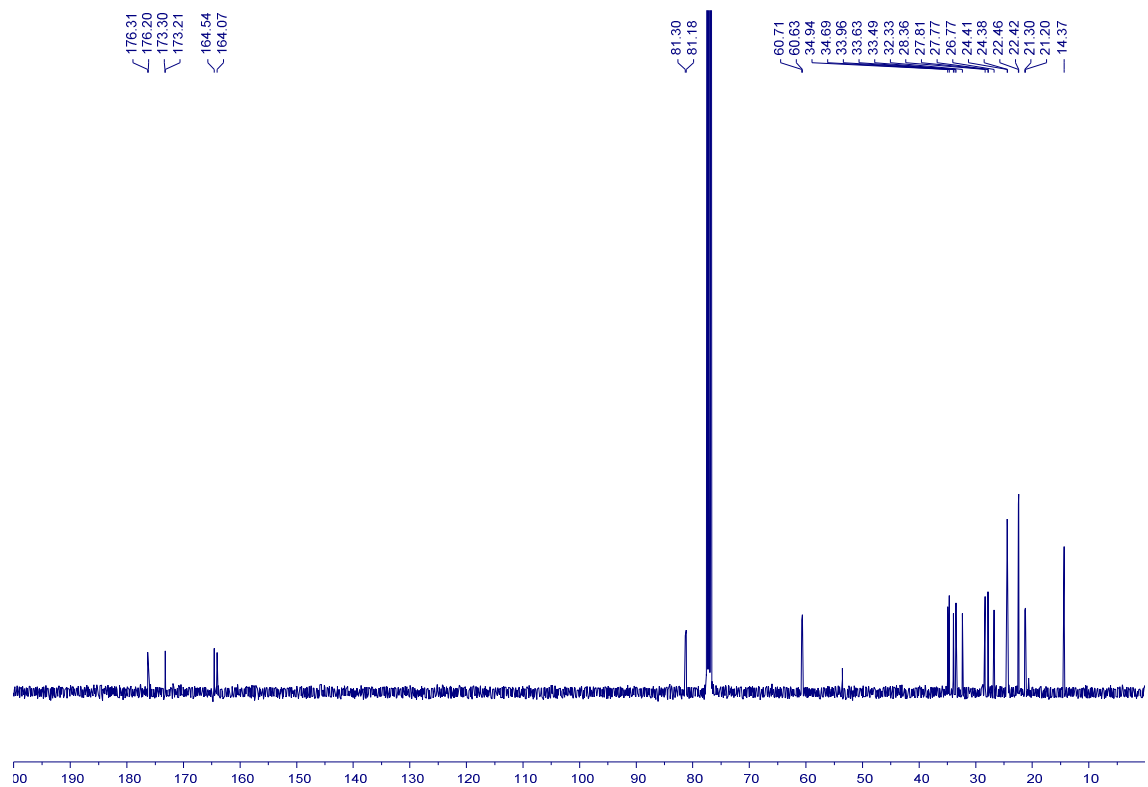

**6m**  $^1\text{H}$  NMR (400 MHz,  $\text{CDCl}_3$ )

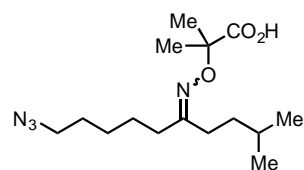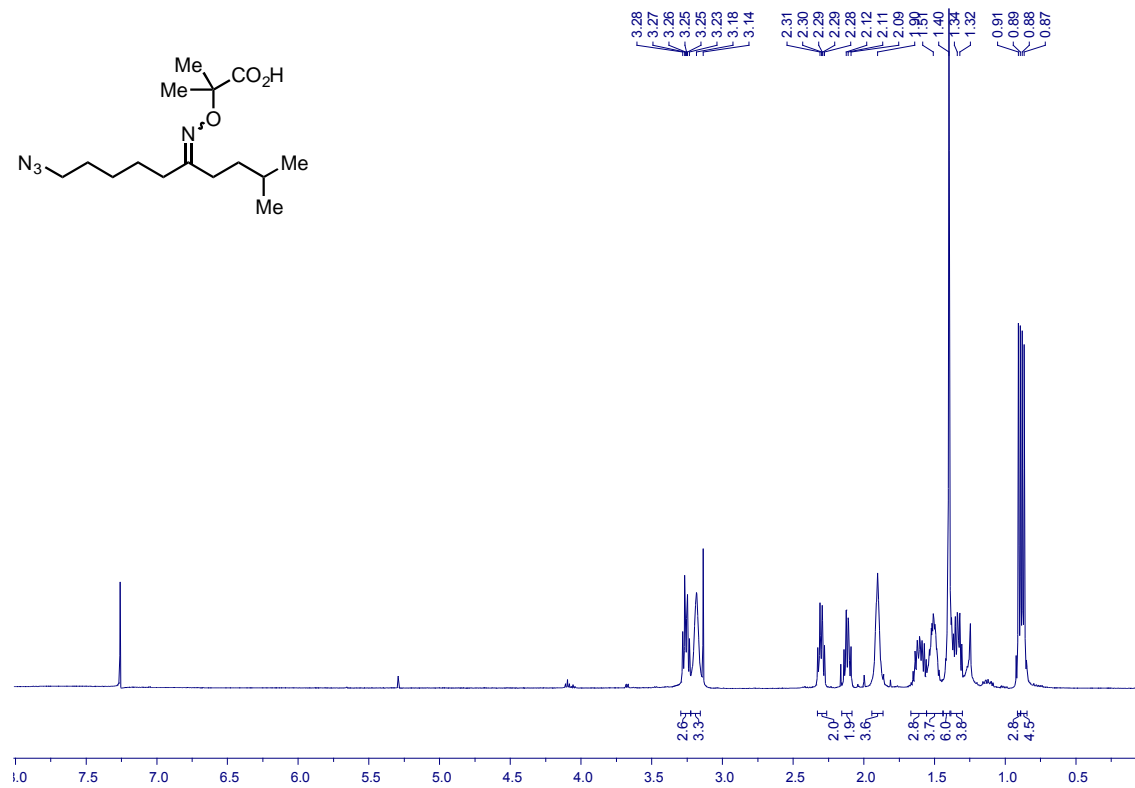

**6m**  $^{13}\text{C}$  NMR (126 MHz,  $\text{CDCl}_3$ )

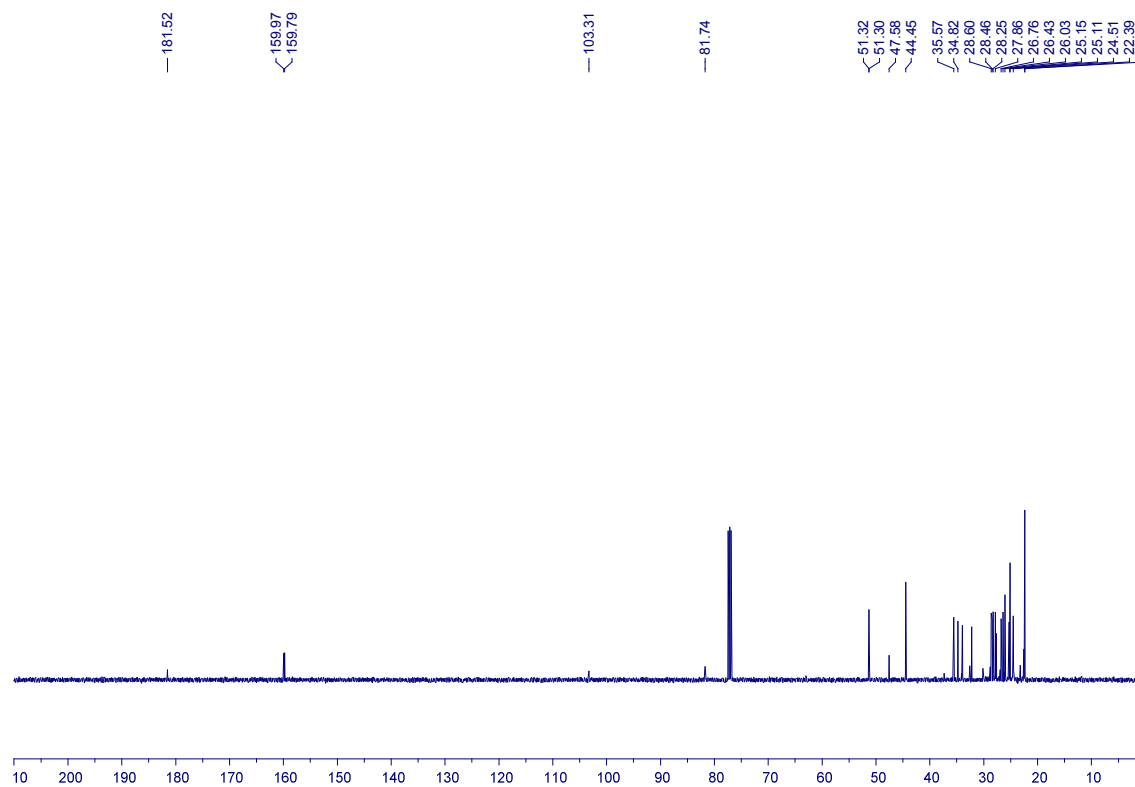

**6n**  $^1\text{H}$  NMR (400 MHz,  $\text{CDCl}_3$ )

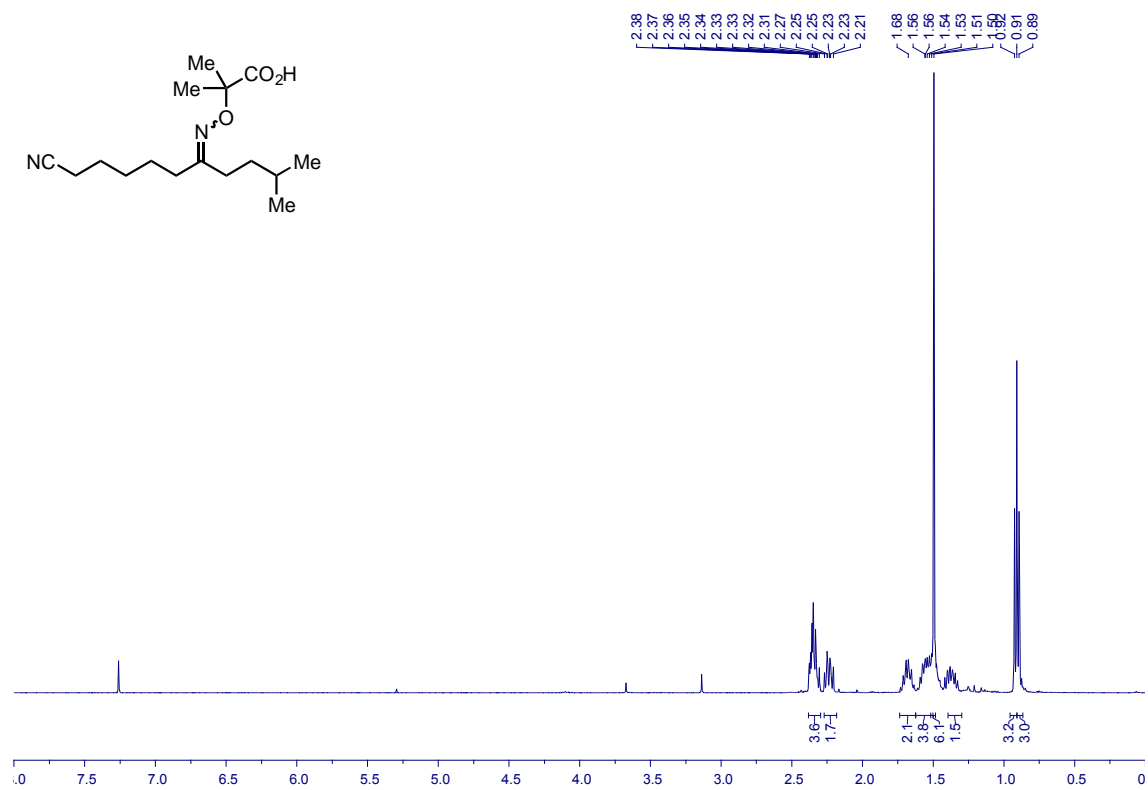

**6n**  $^{13}\text{C}$  NMR (126 MHz,  $\text{CDCl}_3$ )

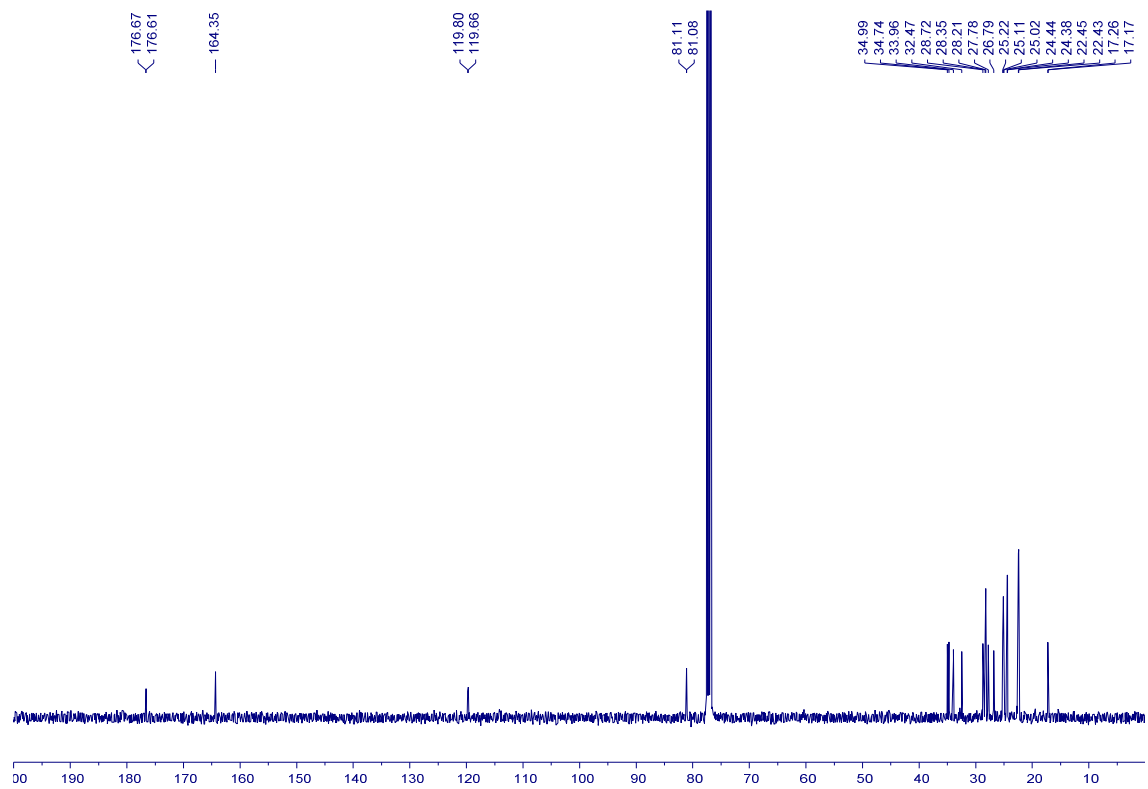

**6o**  $^1\text{H}$  NMR (400 MHz,  $\text{CDCl}_3$ )

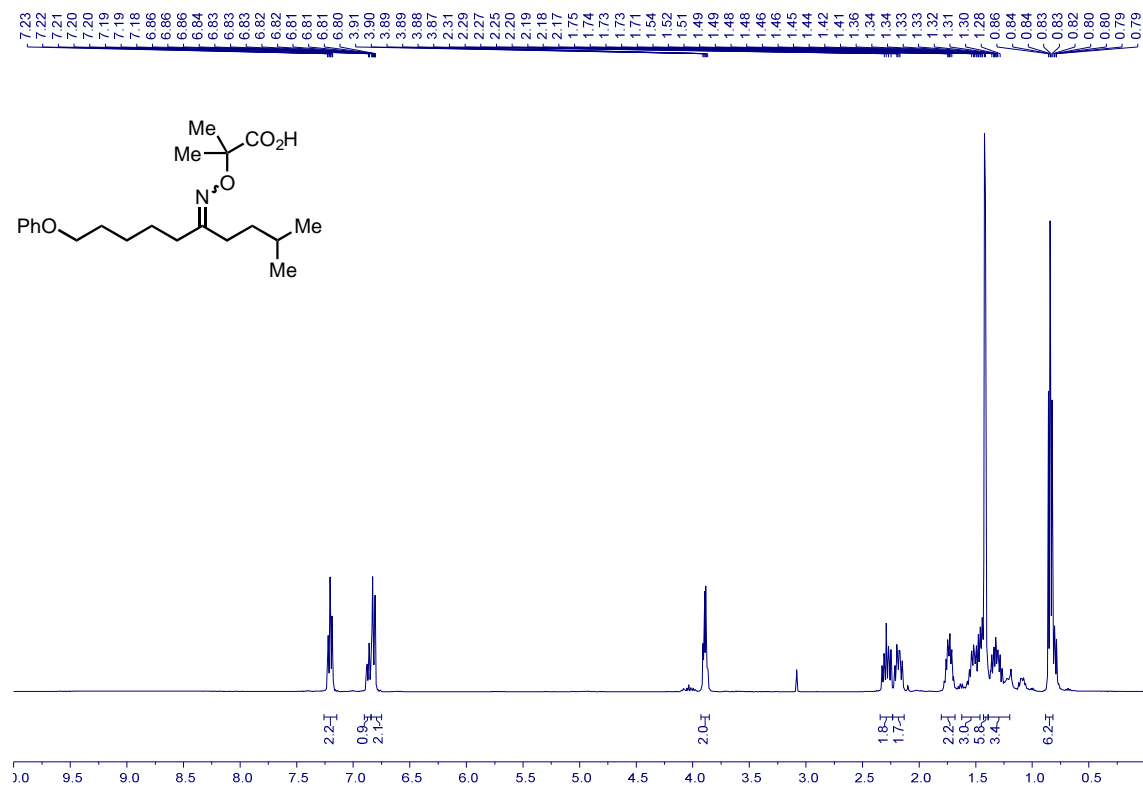

**6o**  $^{13}\text{C}$  NMR (126 MHz,  $\text{CDCl}_3$ )

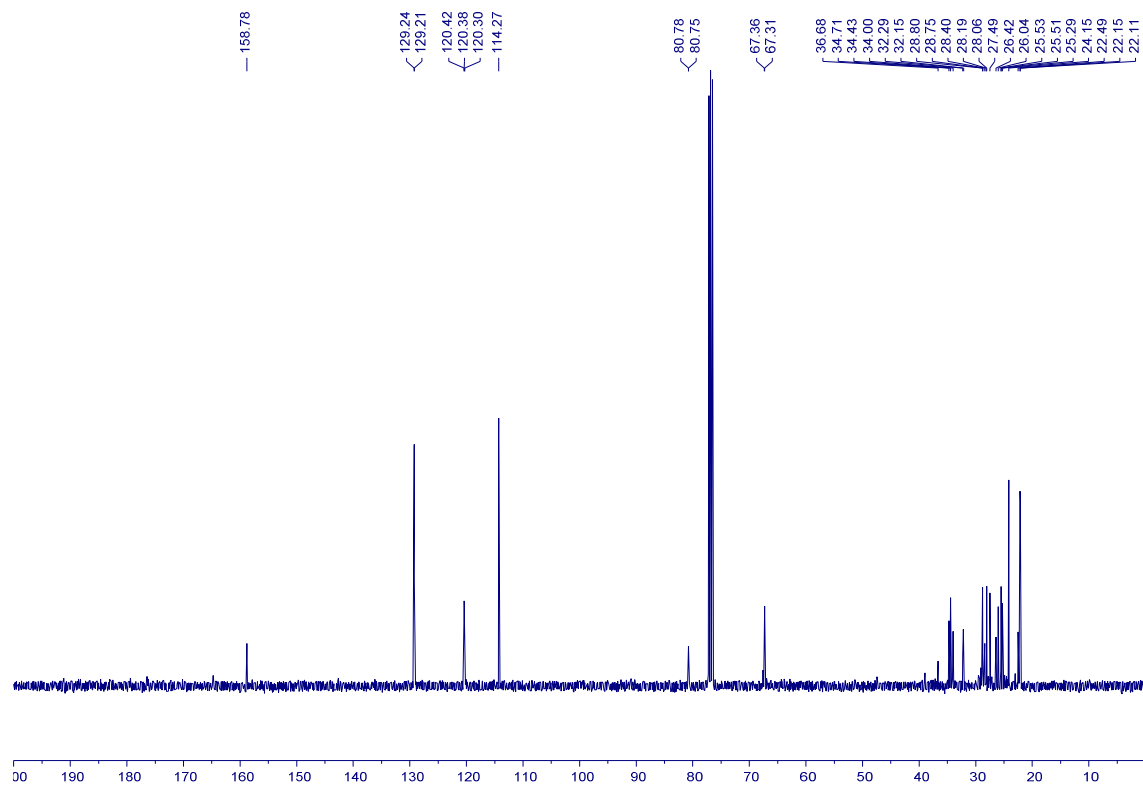

**6p**  $^1\text{H}$  NMR (400 MHz,  $\text{CDCl}_3$ )

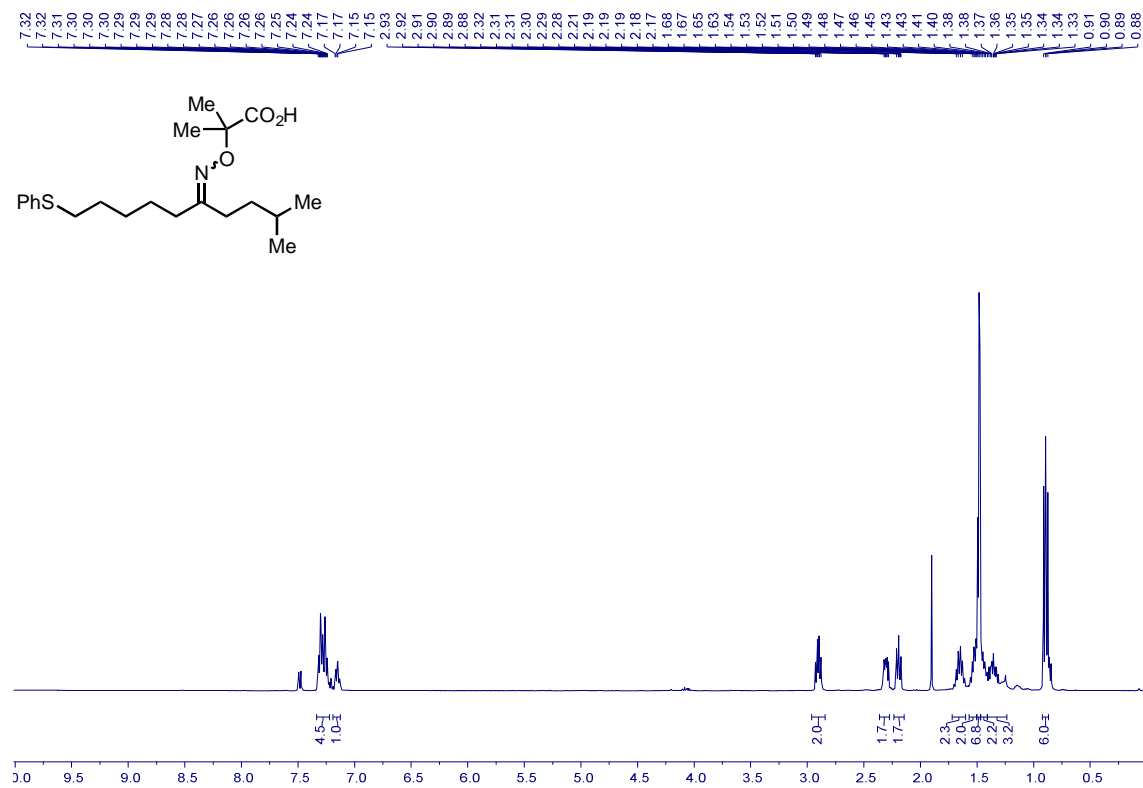

**6p**  $^{13}\text{C}$  NMR (126 MHz,  $\text{CDCl}_3$ )

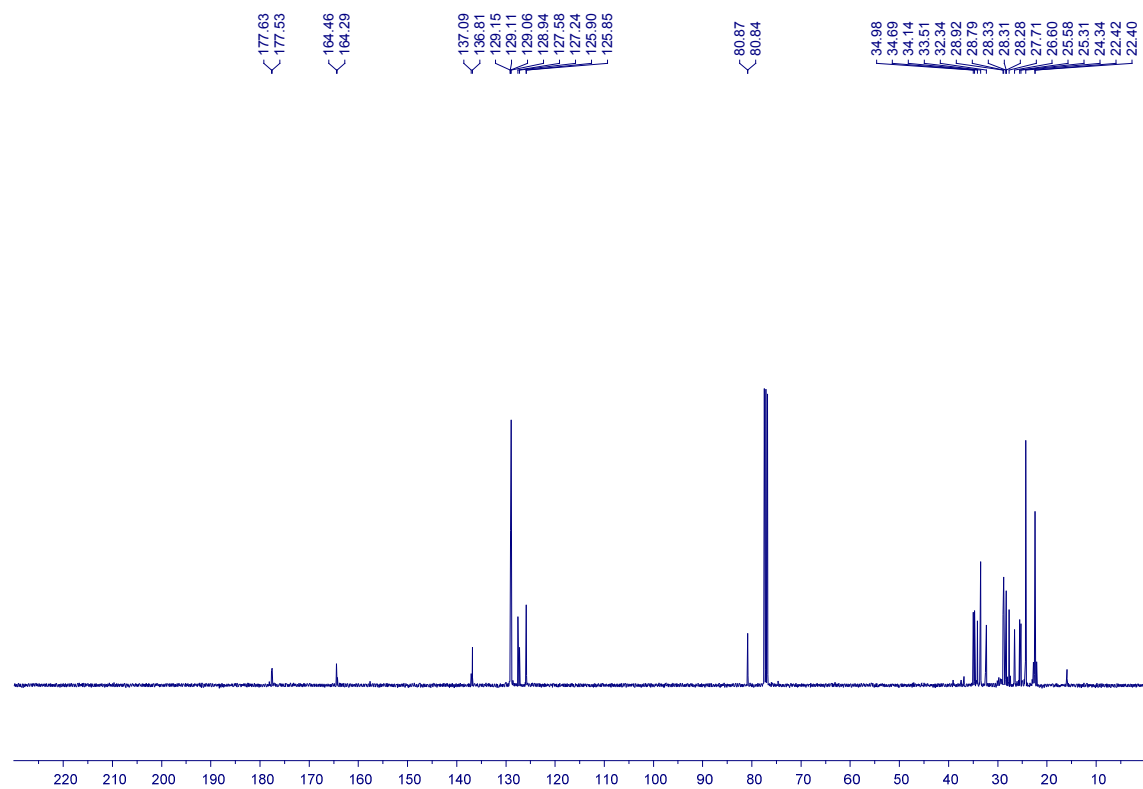



6q <sup>1</sup>H NMR (400 MHz, CDCl<sub>3</sub>)

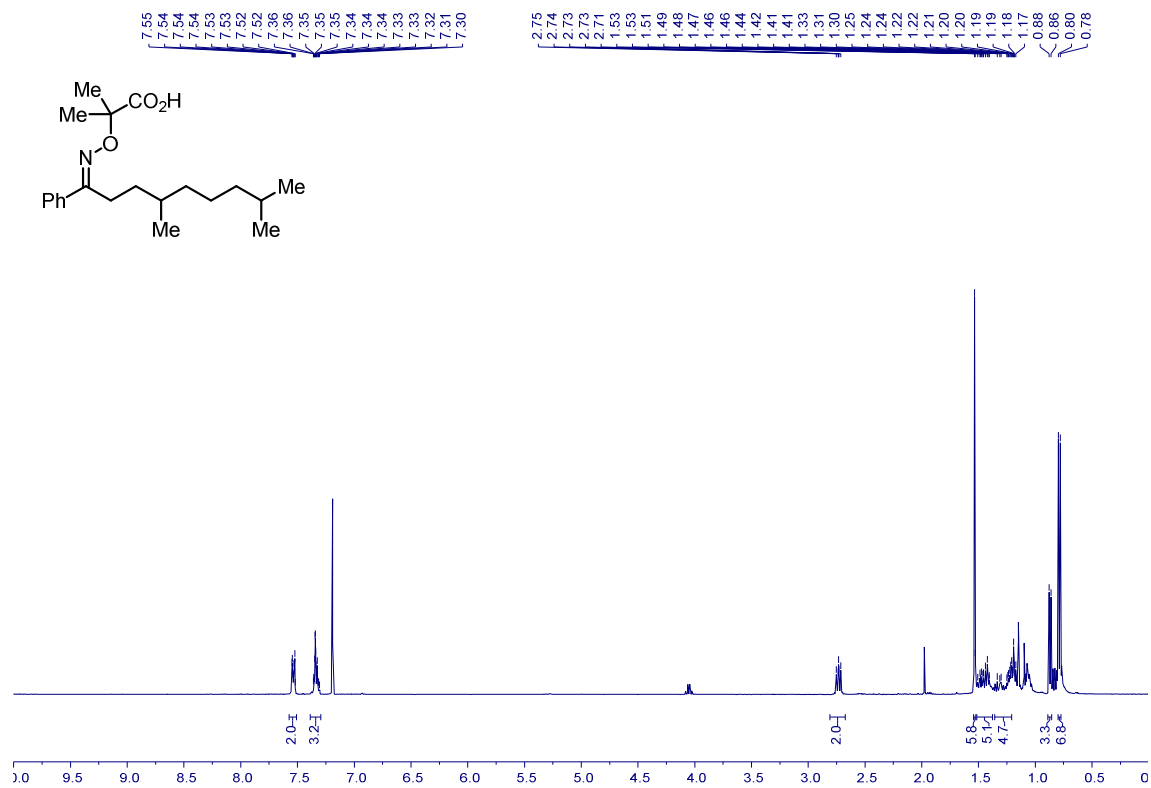

6q <sup>13</sup>C NMR (126 MHz, CDCl<sub>3</sub>)

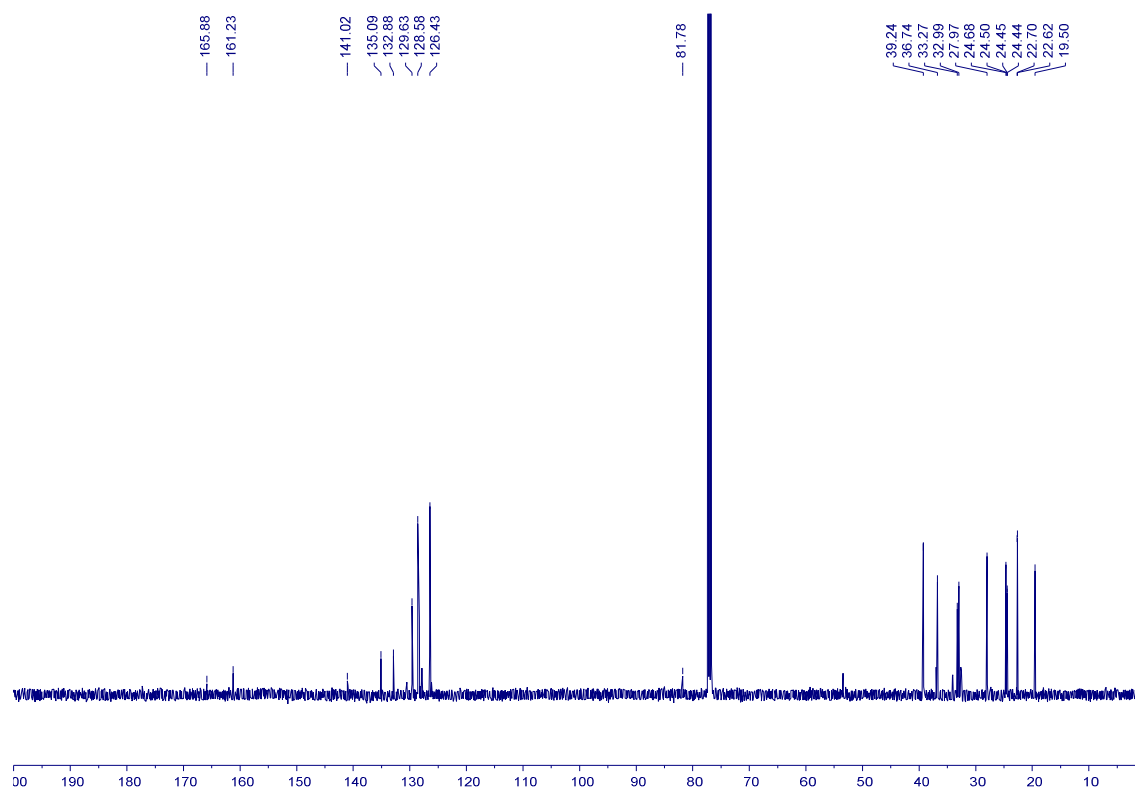

**6r**  $^1\text{H}$  NMR (400 MHz,  $\text{CDCl}_3$ )

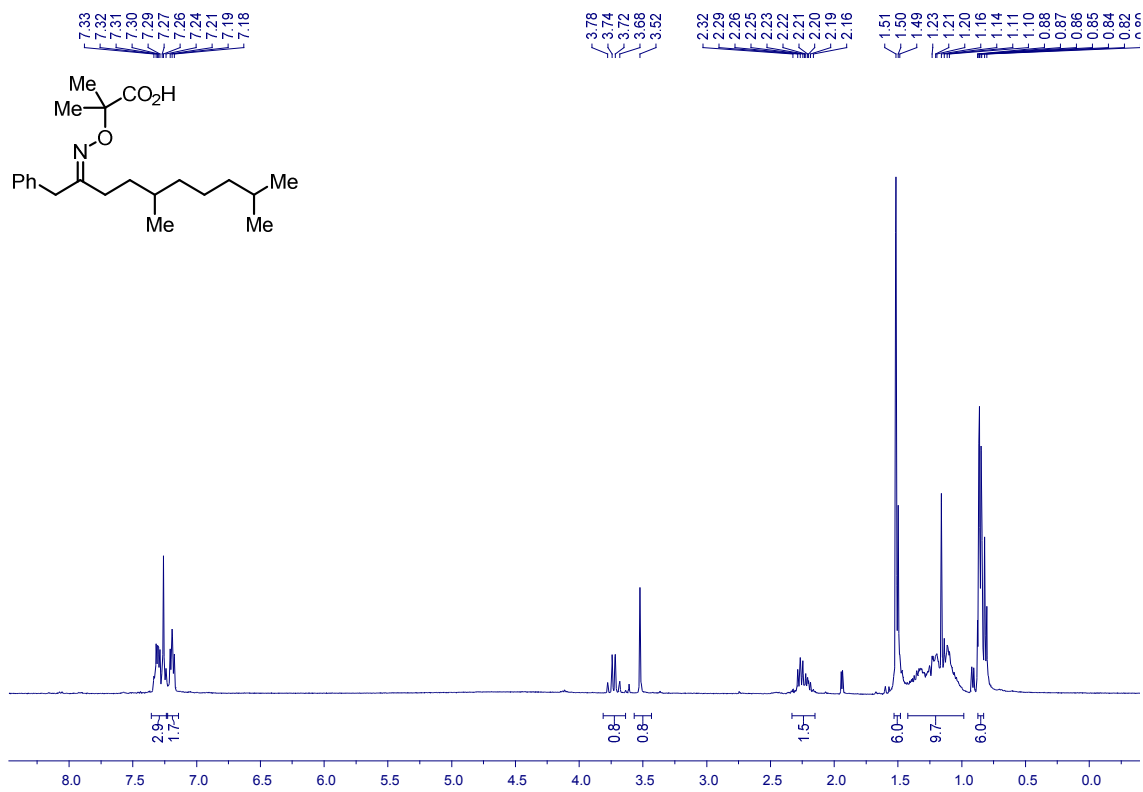

**6r**  $^{13}\text{C}$  NMR (126 MHz,  $\text{CDCl}_3$ )

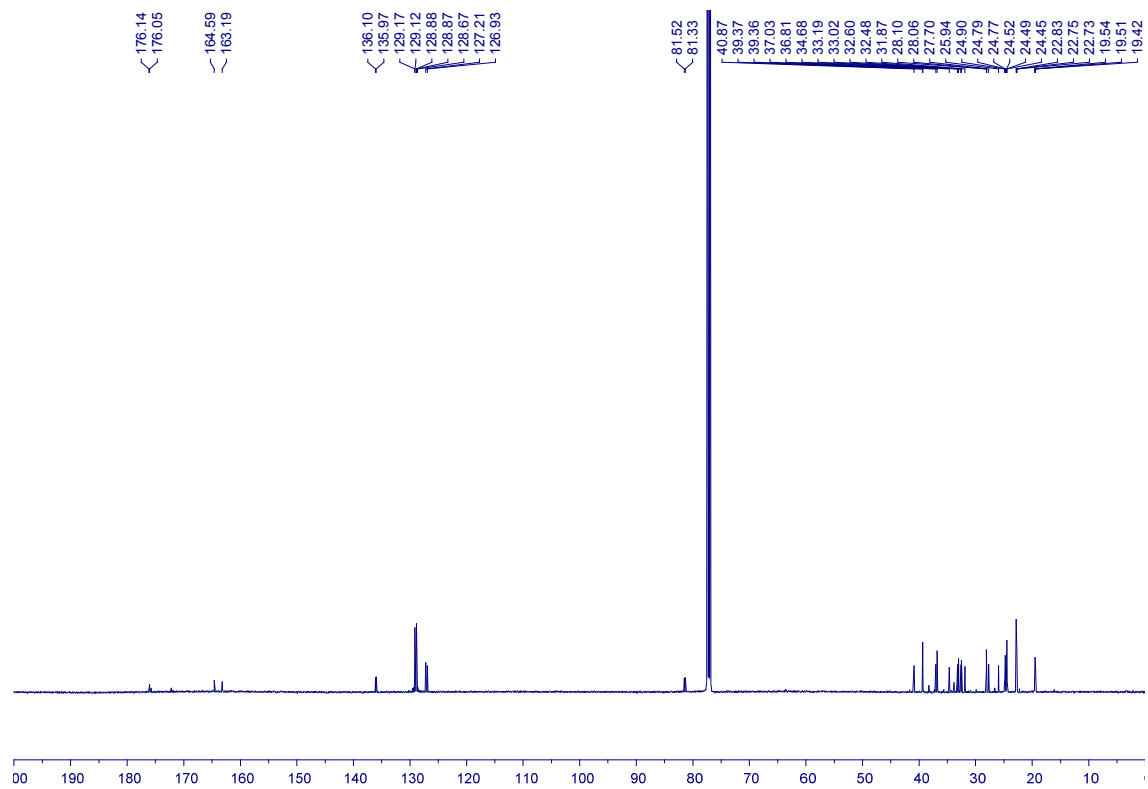

**6s**  $^1\text{H}$  NMR (400 MHz,  $\text{CDCl}_3$ )

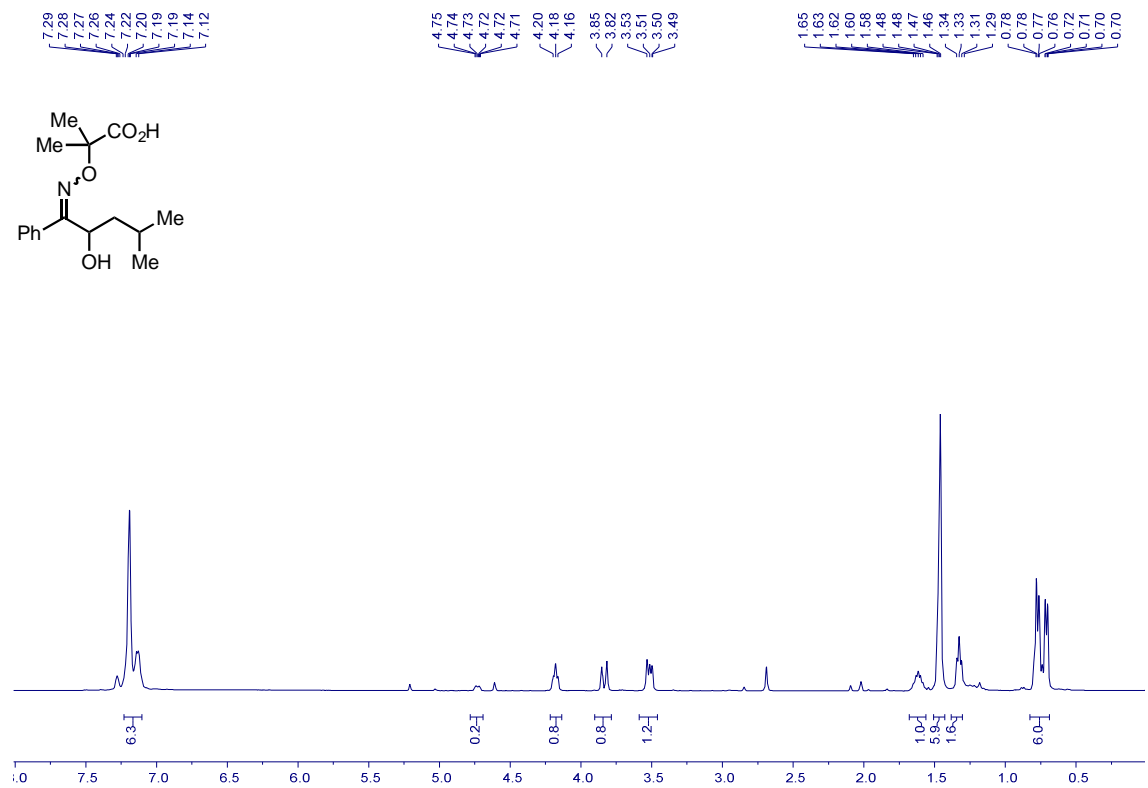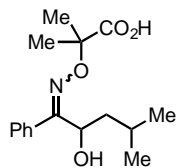

**6s**  $^{13}\text{C}$  NMR (126 MHz,  $\text{CDCl}_3$ )

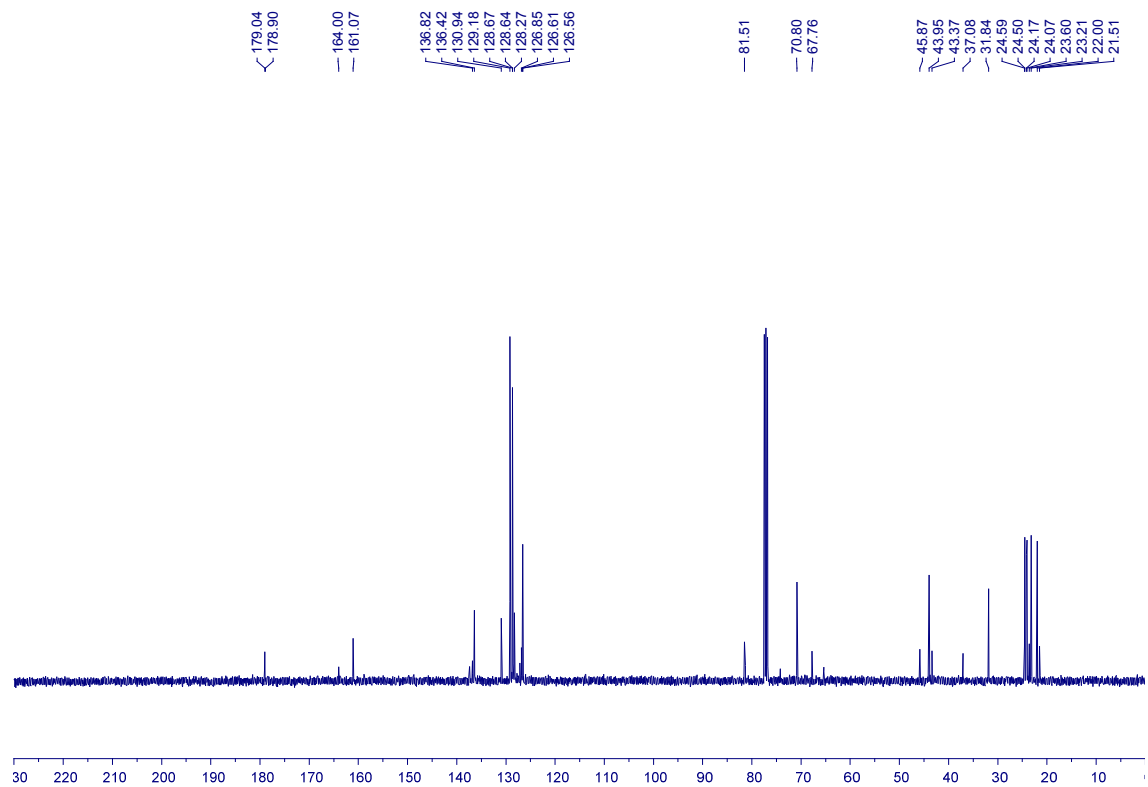

**6t**  $^1\text{H}$  NMR (400 MHz,  $\text{CDCl}_3$ )

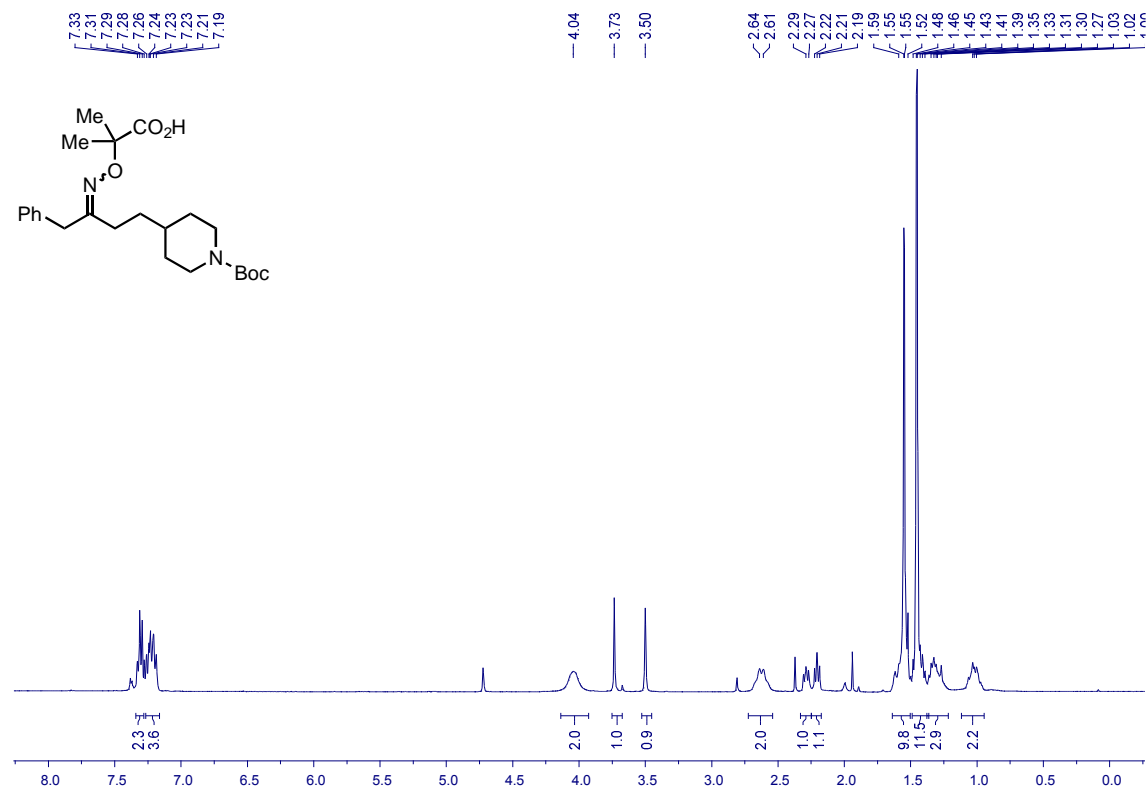

**6t**  $^{13}\text{C}$  NMR (126 MHz,  $\text{CDCl}_3$ )

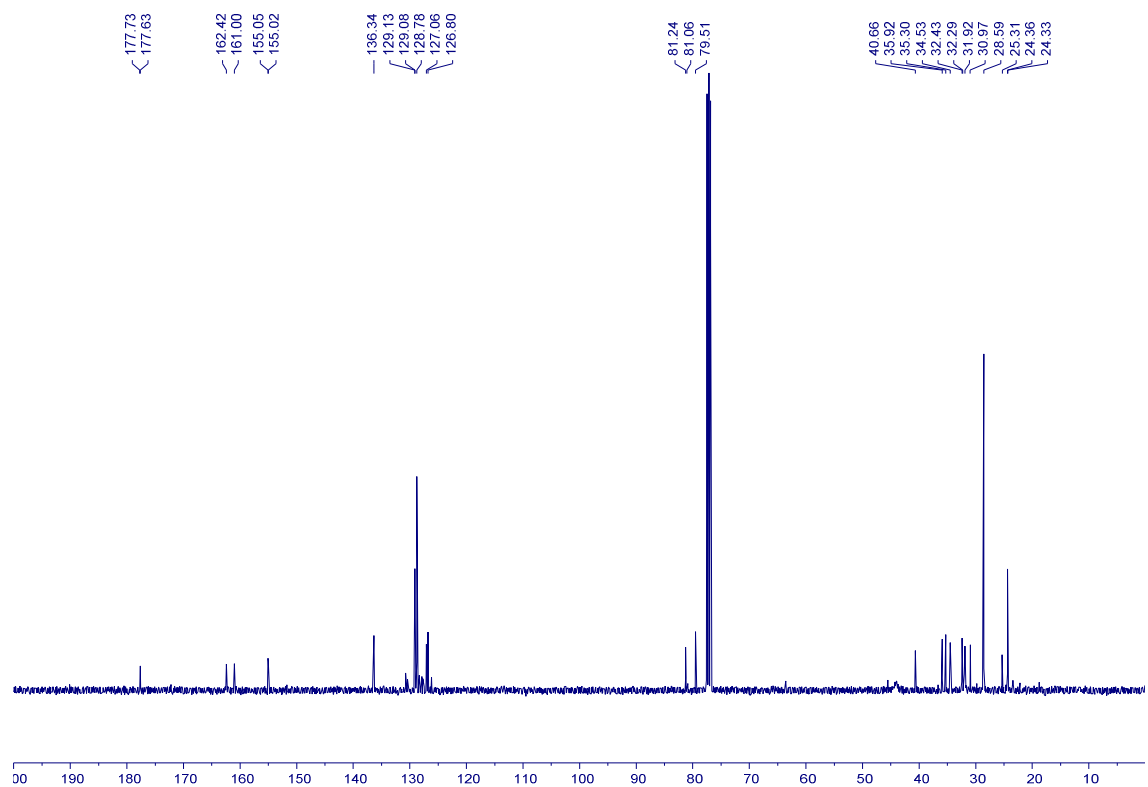

**6u**  $^1\text{H}$  NMR (400 MHz,  $\text{CDCl}_3$ )

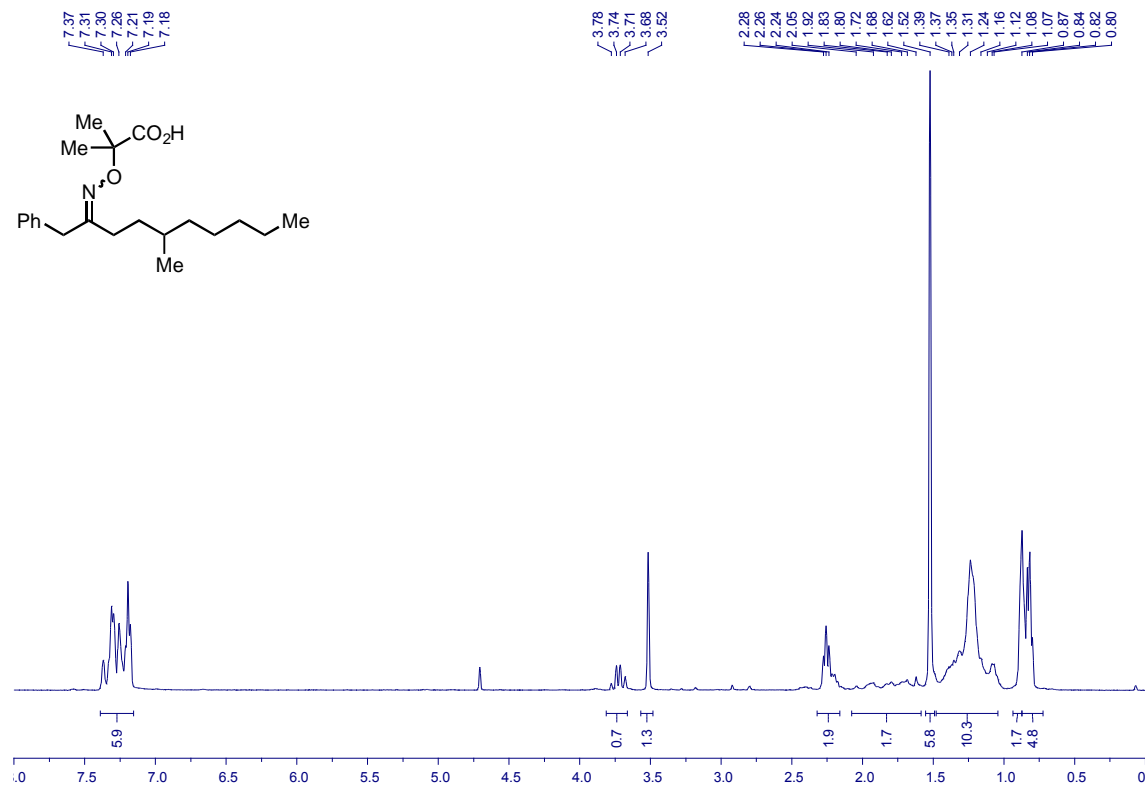

**6u**  $^{13}\text{C}$  NMR (126 MHz,  $\text{CDCl}_3$ )

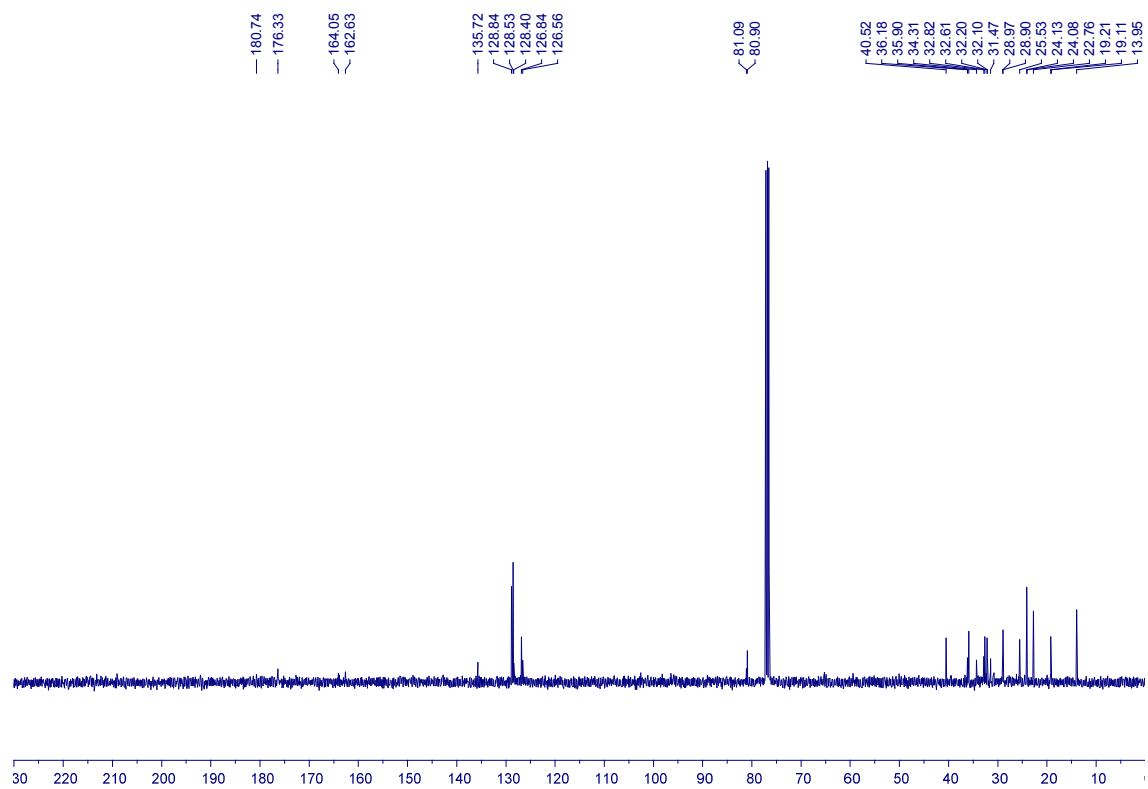

6v  $^1\text{H}$  NMR (400 MHz,  $\text{CDCl}_3$ )

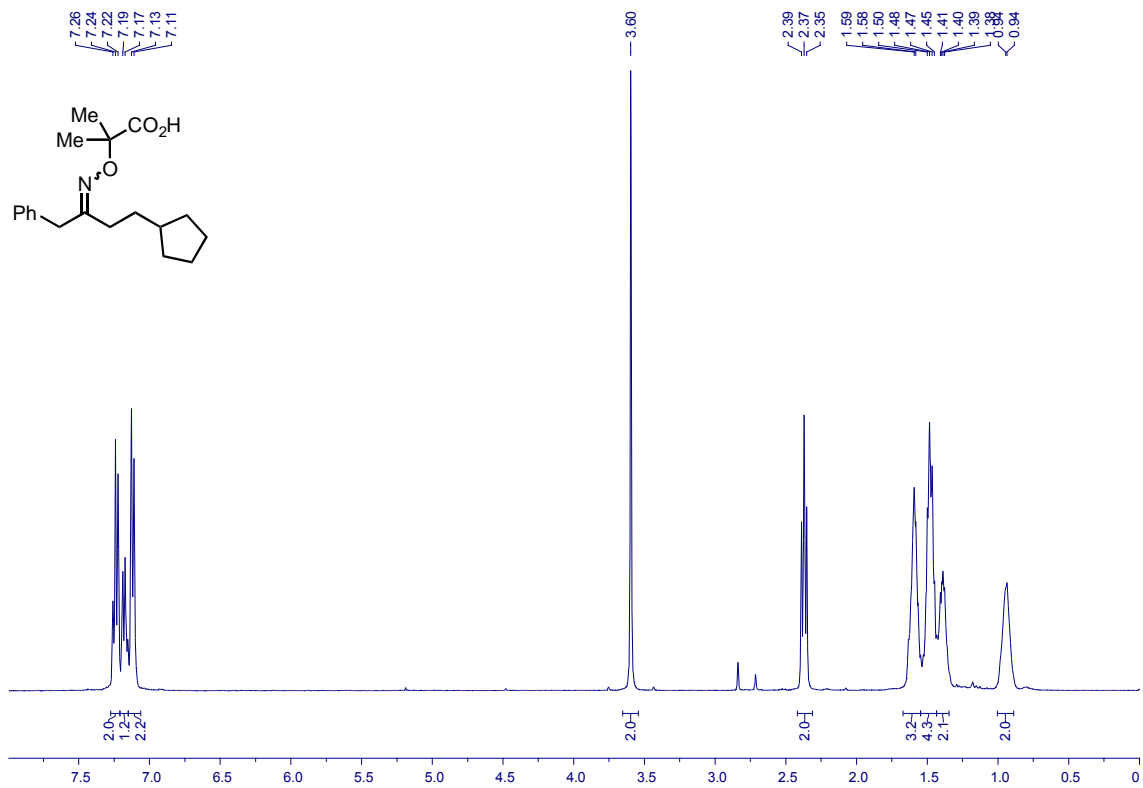

6v  $^{13}\text{C}$  NMR (126 MHz,  $\text{CDCl}_3$ )

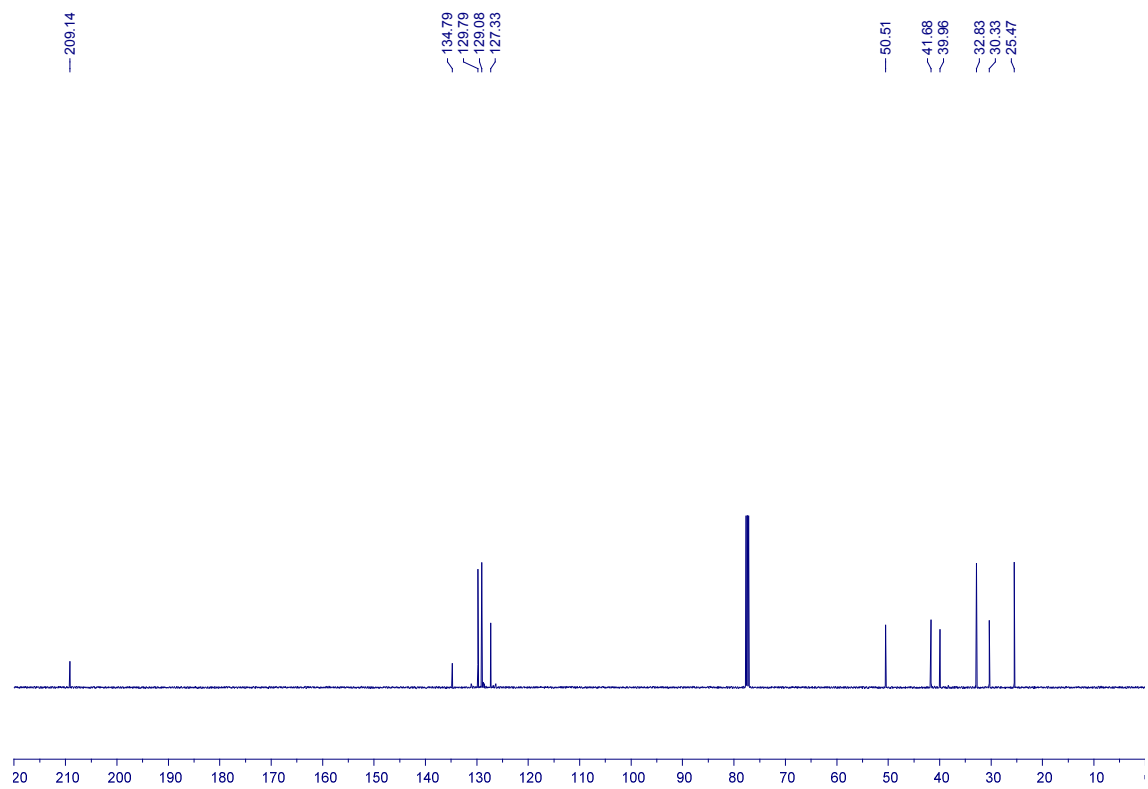

**6w**  $^1\text{H}$  NMR (400 MHz,  $\text{CDCl}_3$ )

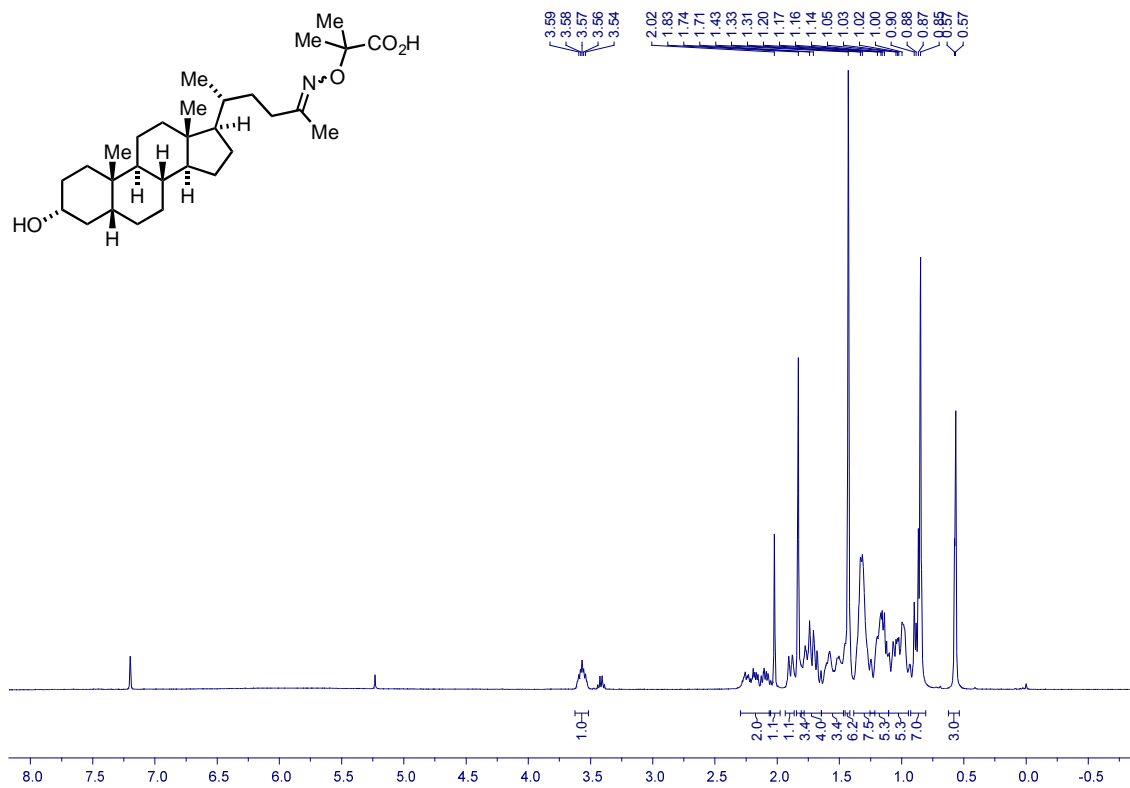

**6w**  $^{13}\text{C}$  NMR (126 MHz,  $\text{CDCl}_3$ )

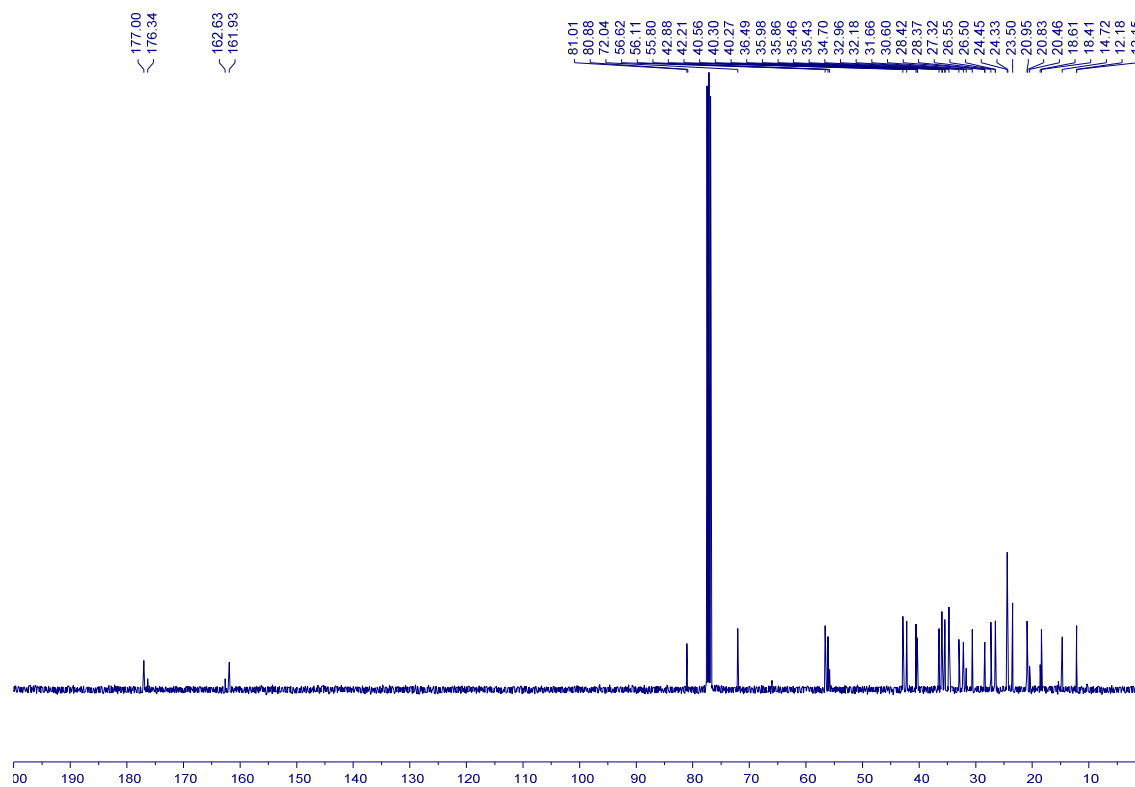

**3b**  $^1\text{H}$  NMR (500 MHz,  $\text{CDCl}_3$ )<sup>d</sup>

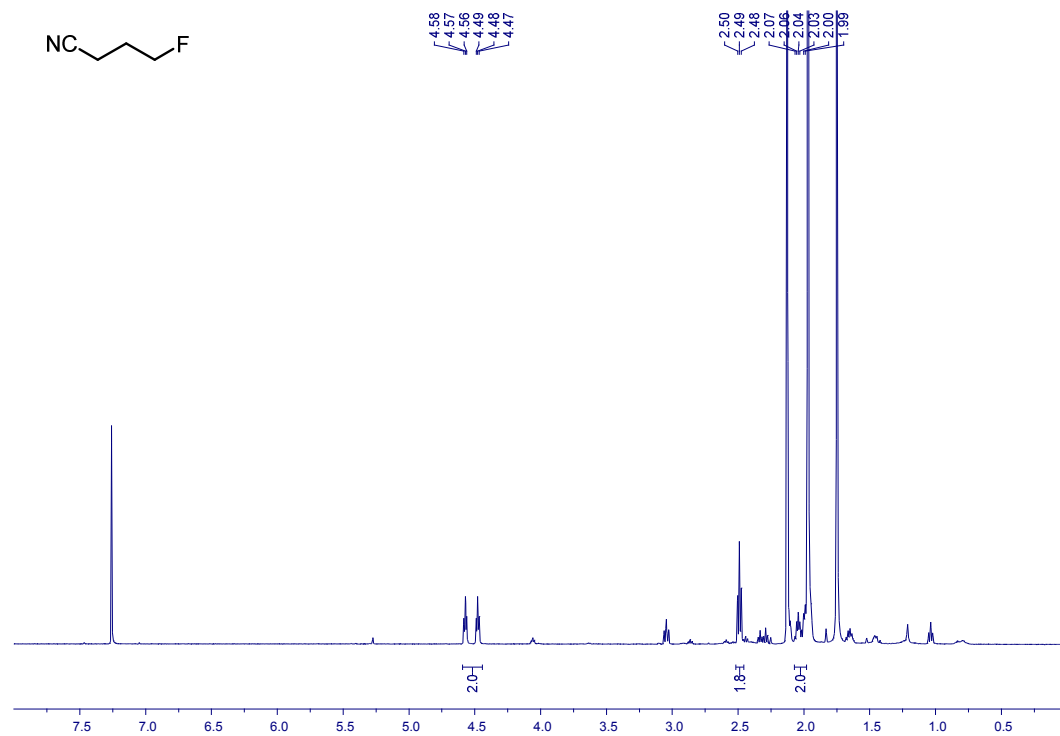

**3b**  $^{13}\text{C}$  NMR (126 MHz,  $\text{CDCl}_3$ )

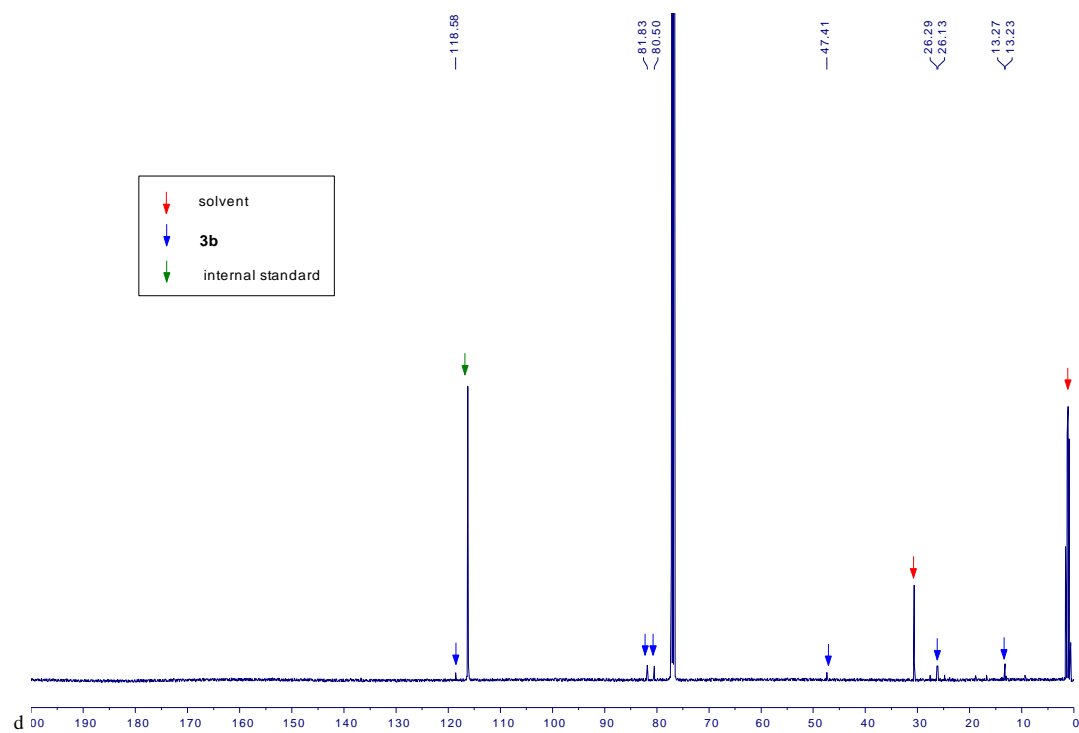



**3b**  $^{19}\text{F}$  NMR (376 MHz,  $\text{CDCl}_3$ )<sup>d</sup>

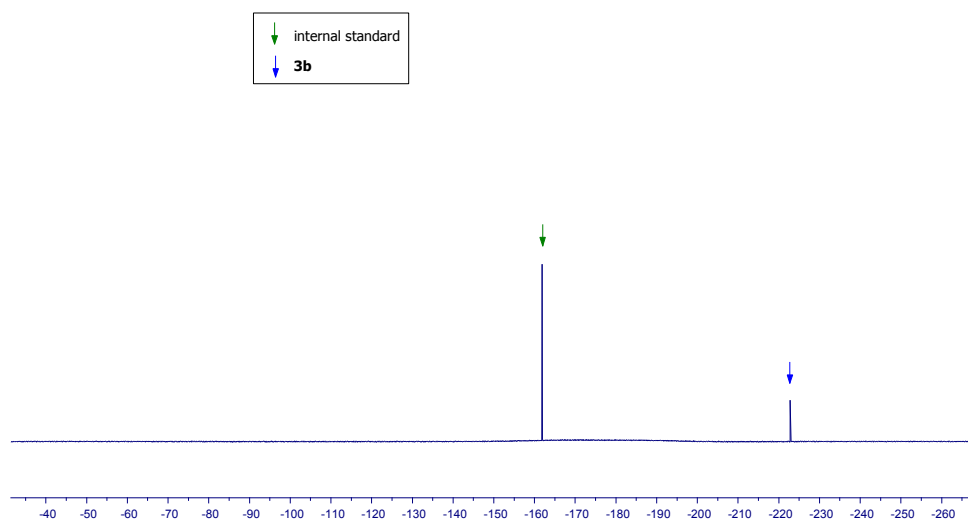

**3e**  $^1\text{H}$  NMR (400 MHz,  $\text{CDCl}_3$ )

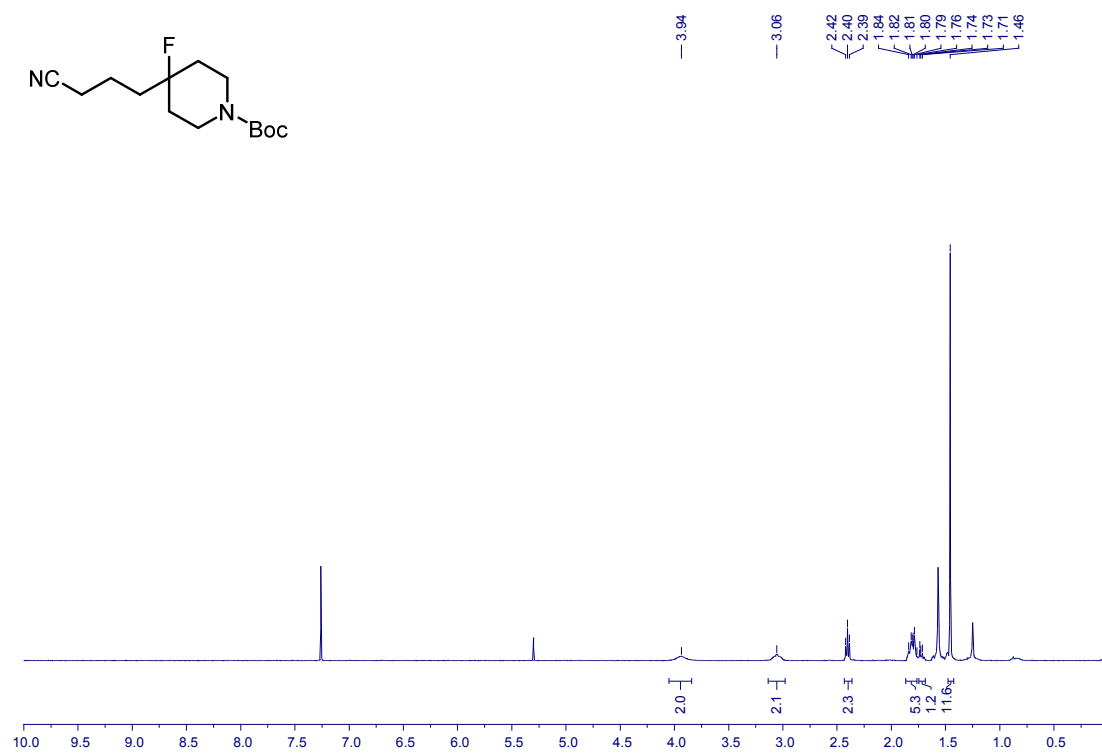

**3e**  $^{13}\text{C}$  NMR (126 MHz,  $\text{CDCl}_3$ )

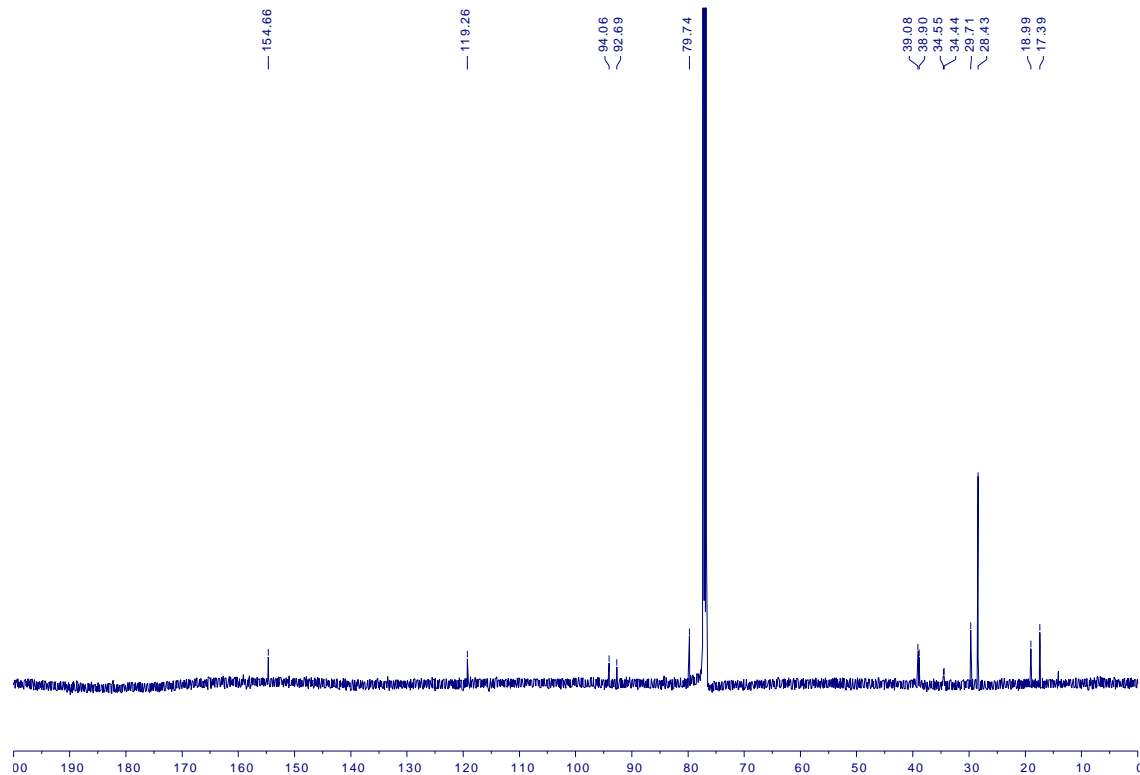

**3e**  $^{19}\text{F}$  NMR (376 MHz,  $\text{CDCl}_3$ )

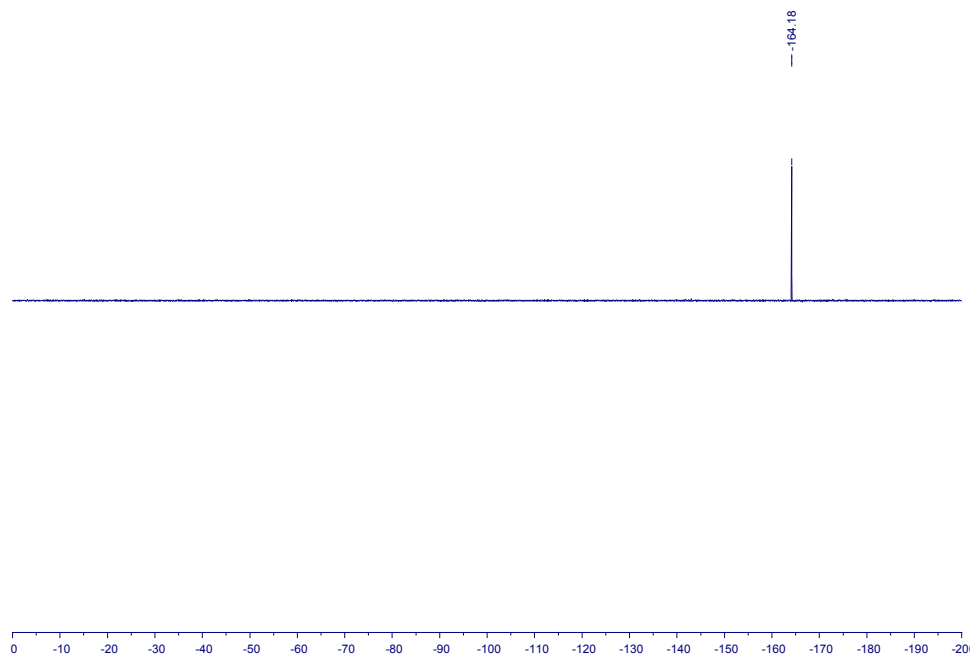

**3f**  $^1\text{H}$  NMR (400 MHz,  $\text{CDCl}_3$ )

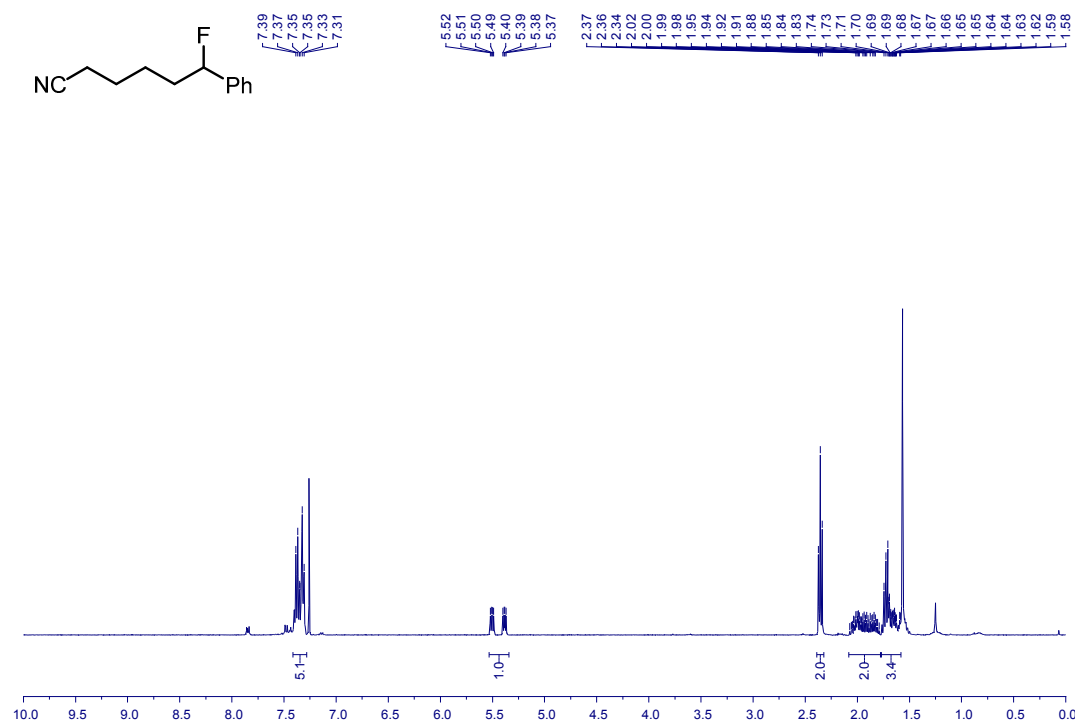

**3f**  $^{13}\text{C}$  NMR (101 MHz,  $\text{CDCl}_3$ )

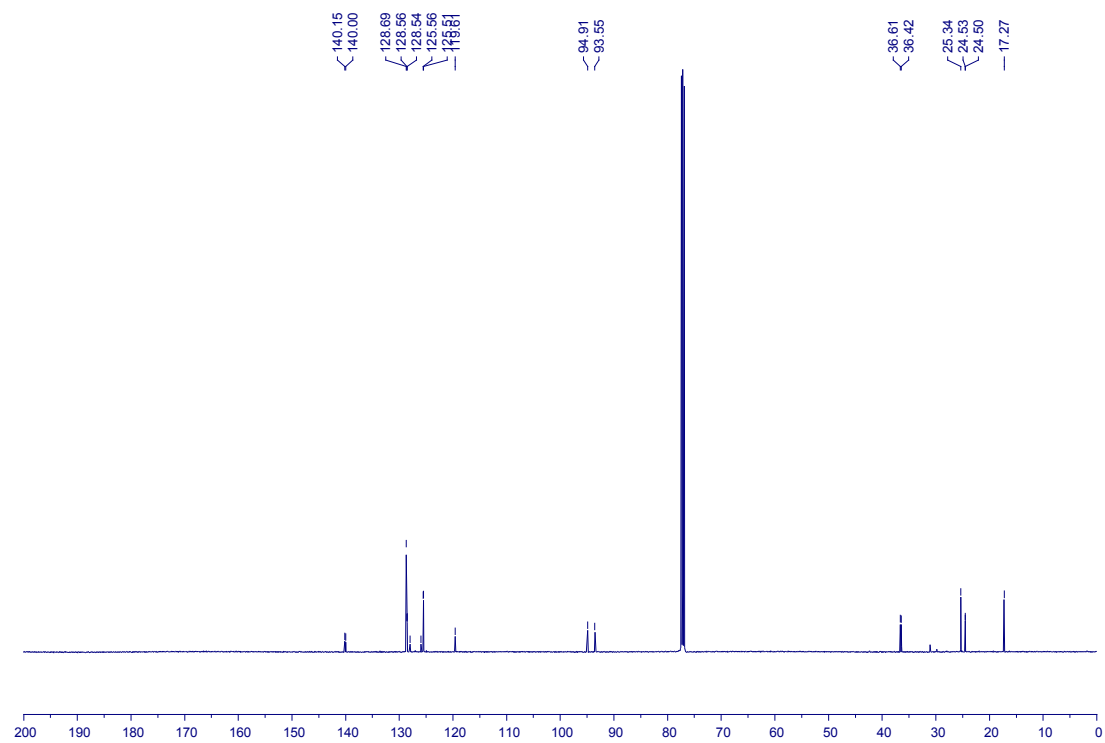

**3f**  $^{19}\text{F}$  NMR (376 MHz,  $\text{CDCl}_3$ )

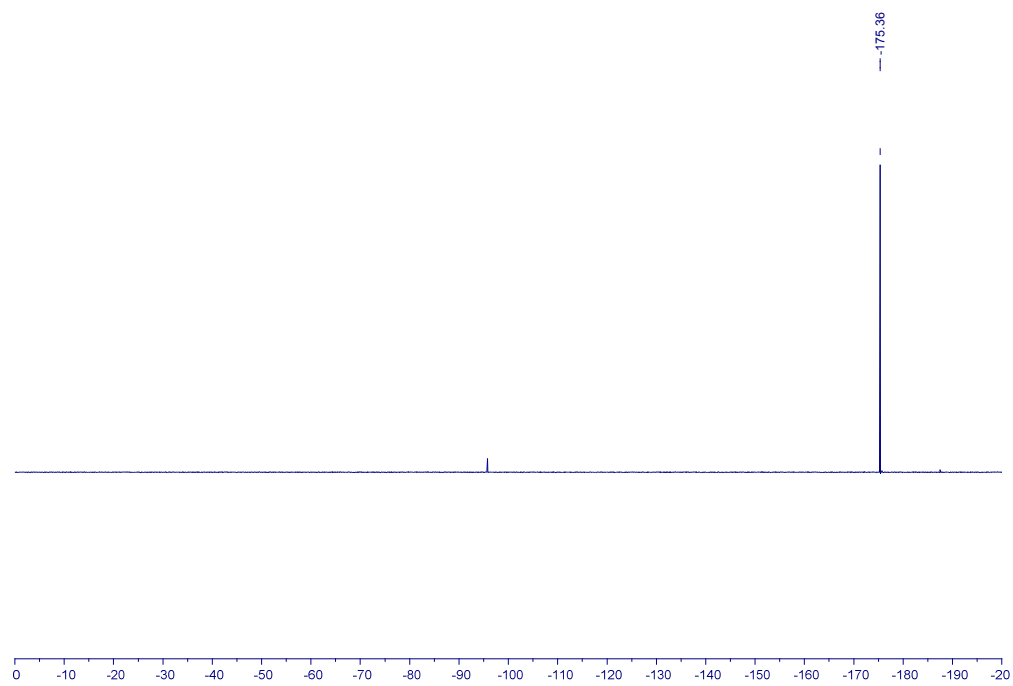

**3g**  $^1\text{H}$  NMR (400 MHz,  $\text{CDCl}_3$ )

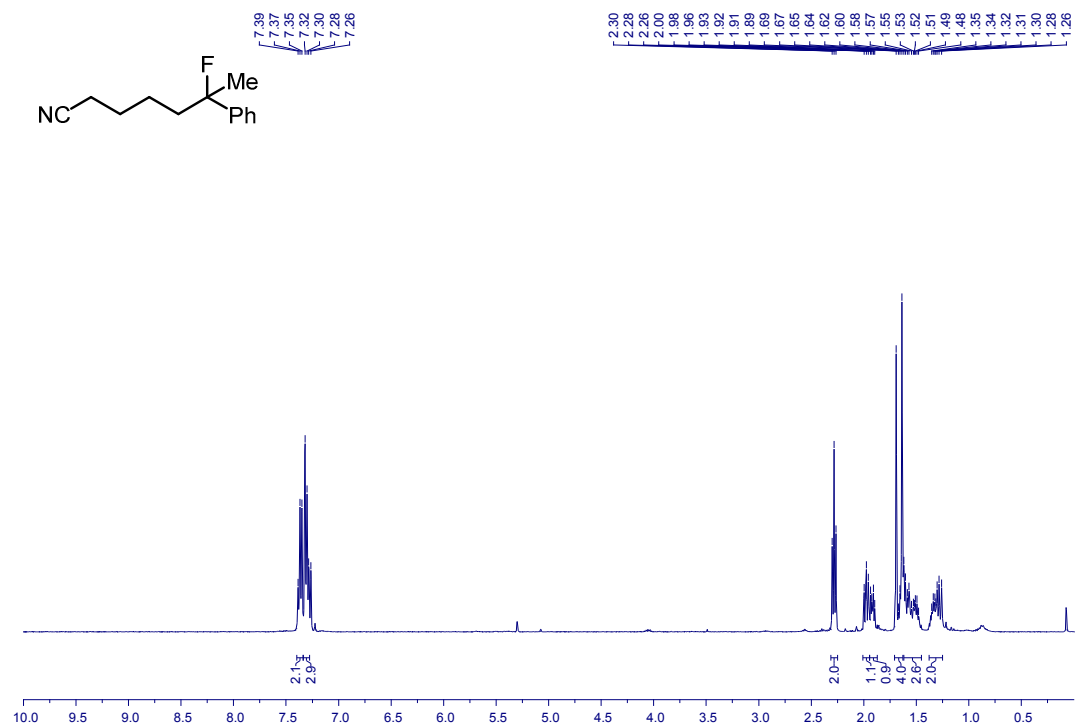

**3g**  $^{13}\text{C}$  NMR (101 MHz,  $\text{CDCl}_3$ )

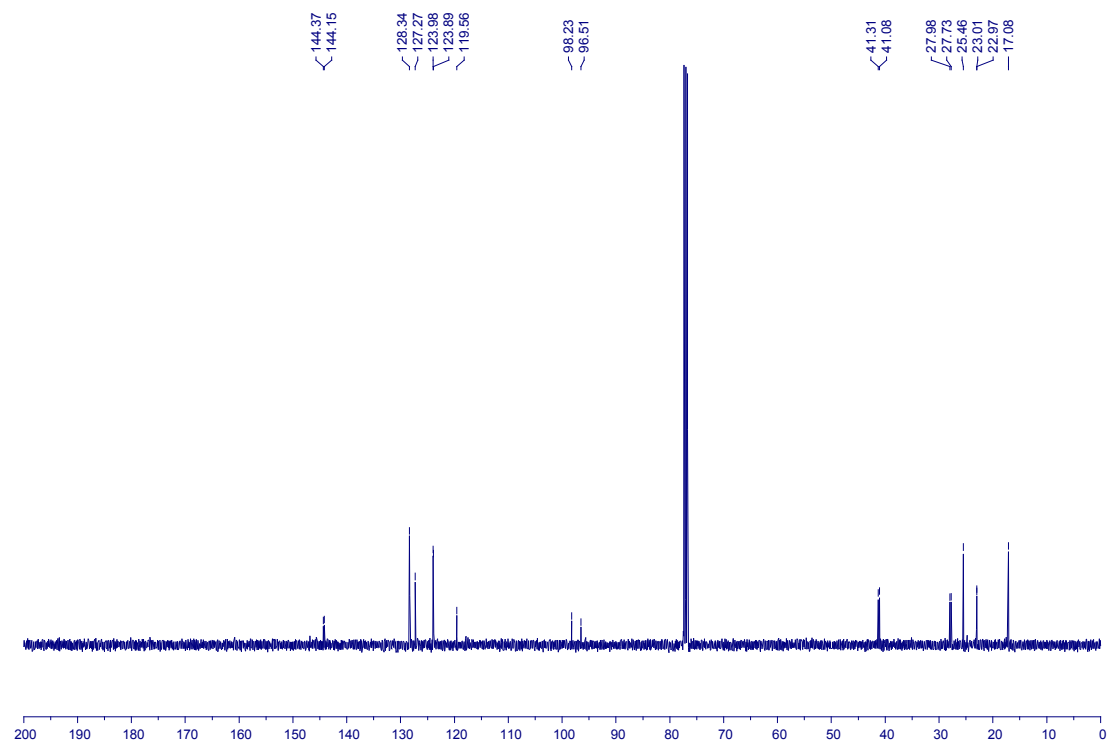

**3g**  $^{19}\text{F}$  NMR (376 MHz,  $\text{CDCl}_3$ )

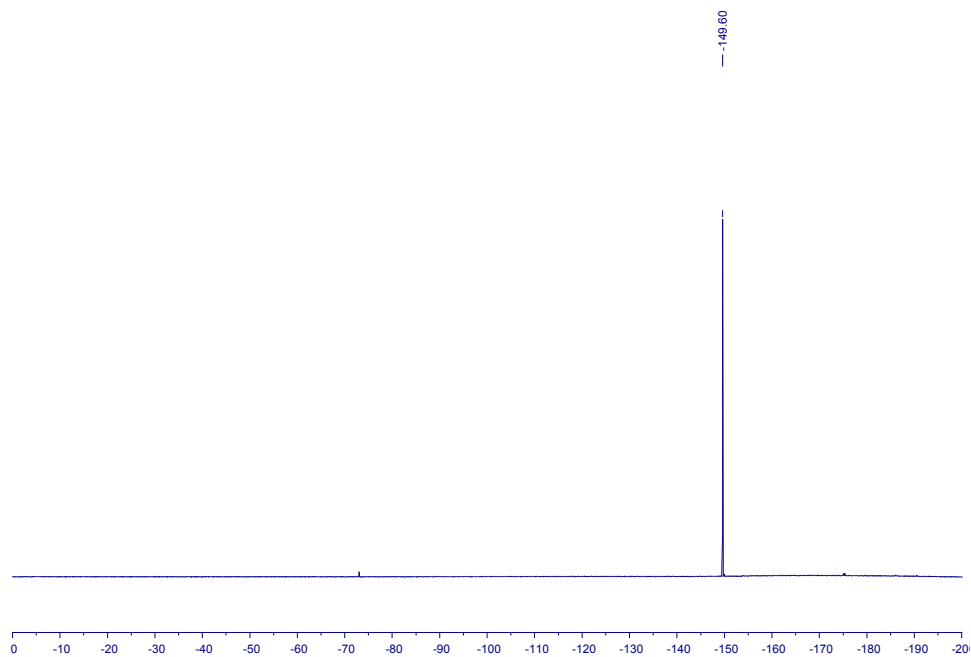

**3h**  $^1\text{H}$  NMR (400 MHz,  $\text{CDCl}_3$ )

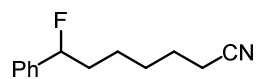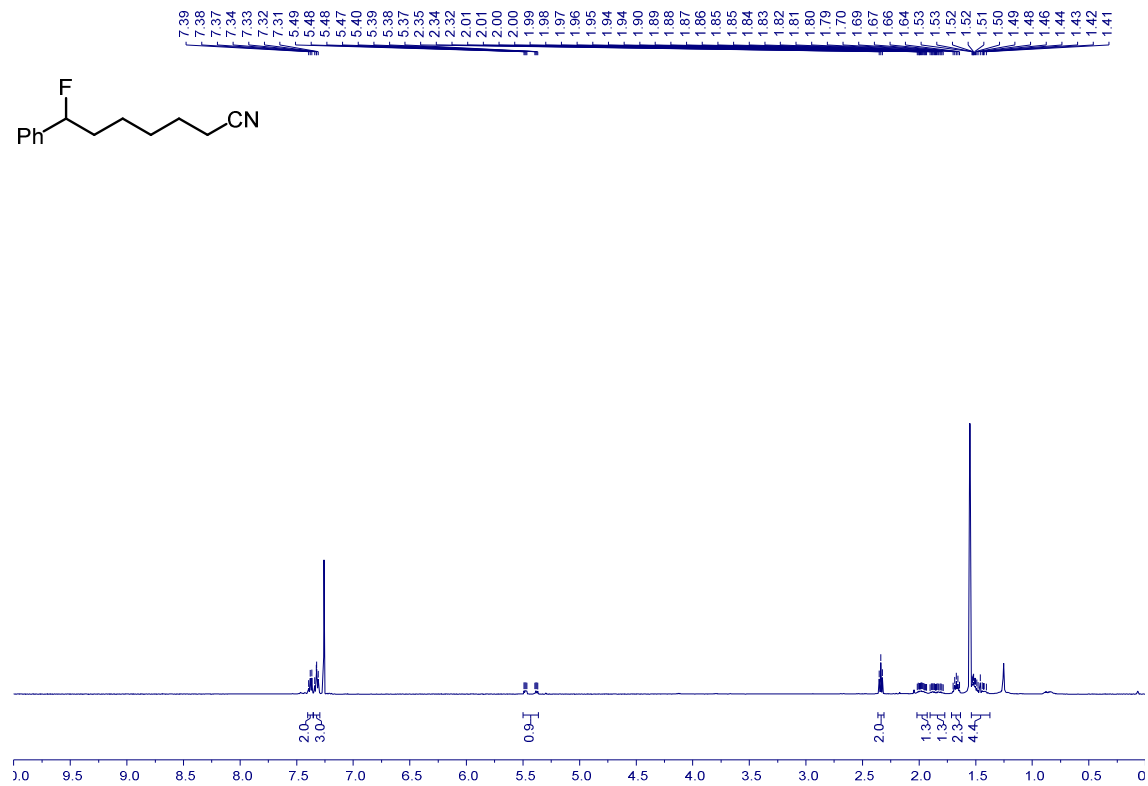

**3h**  $^{13}\text{C}$  NMR (101 MHz,  $\text{CDCl}_3$ )

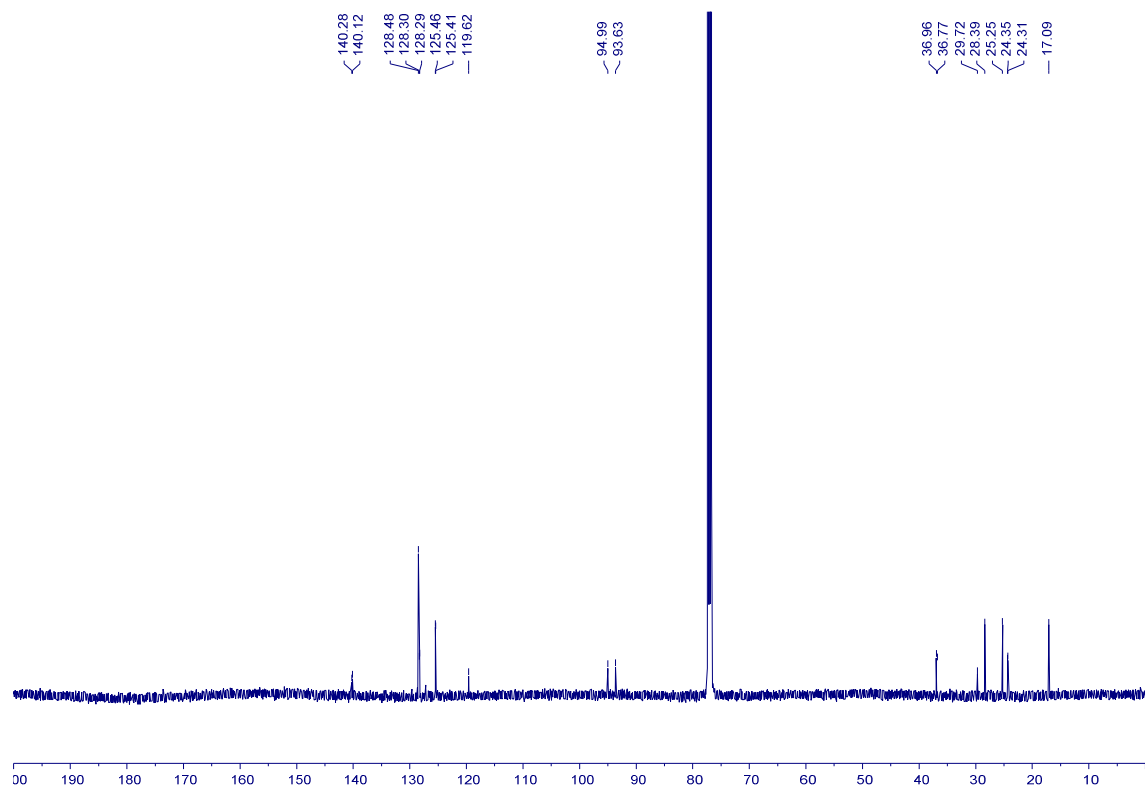



**3h**  $^{19}\text{F}$  NMR (376 MHz,  $\text{CDCl}_3$ )

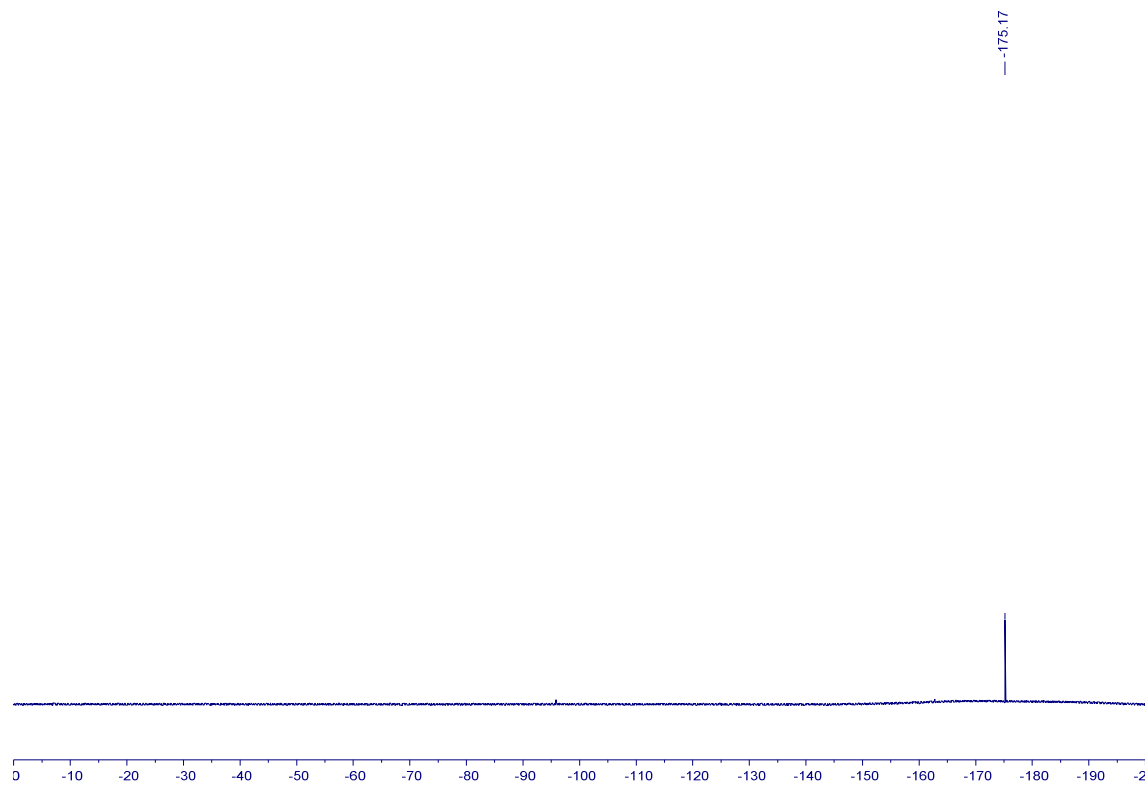

**3i**  $^1\text{H}$  NMR (400 MHz,  $\text{CDCl}_3$ )

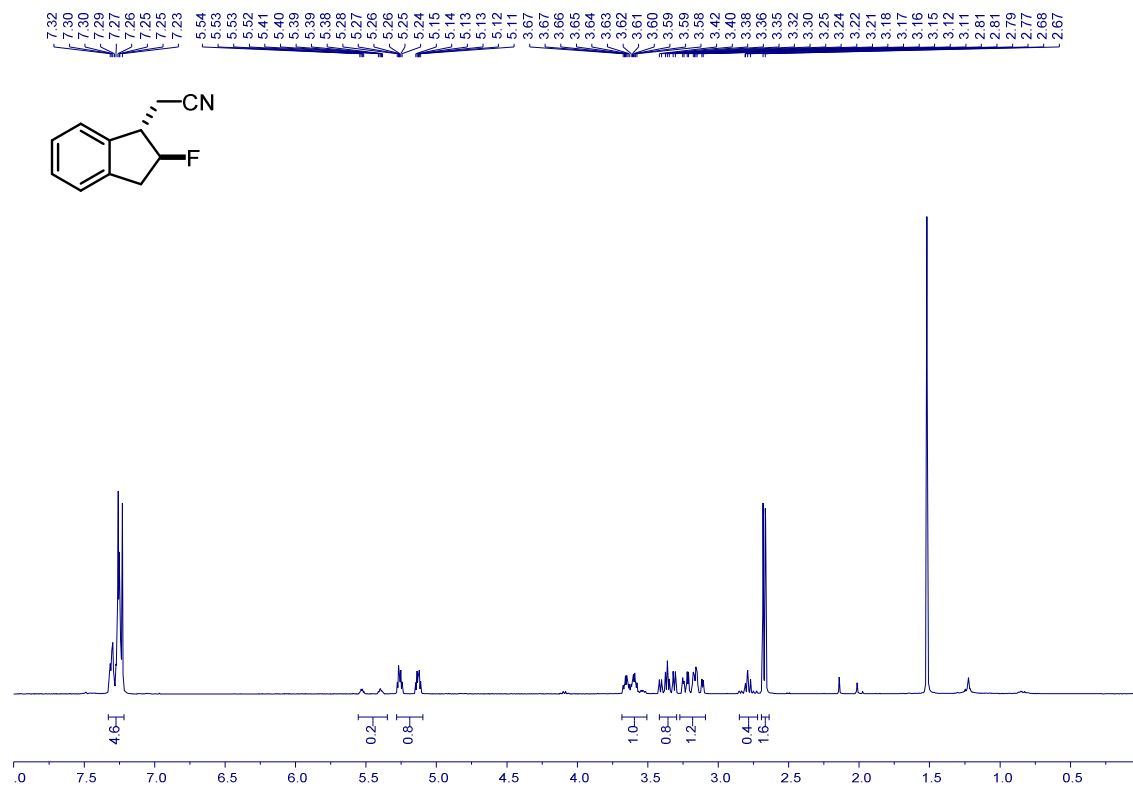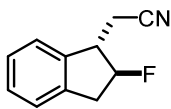

**3i**  $^{13}\text{C}$  NMR (101 MHz,  $\text{CDCl}_3$ )

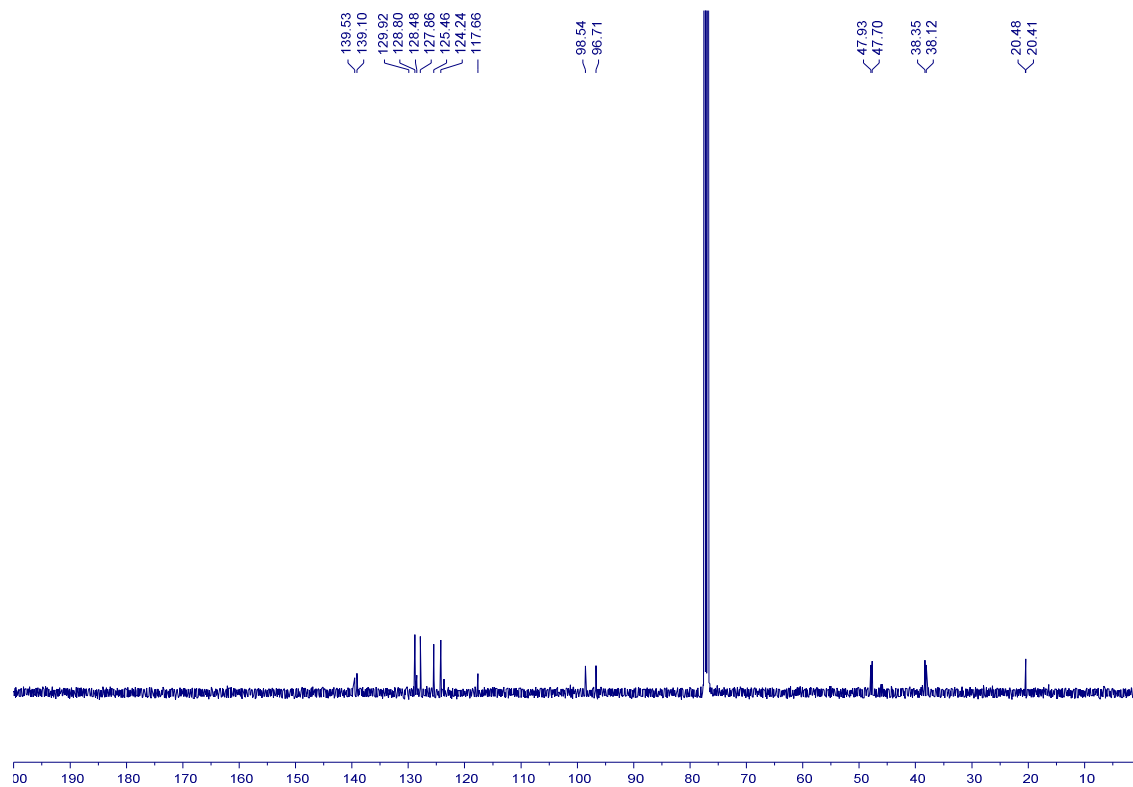

**3i**  $^{19}\text{F}$  NMR (376 MHz,  $\text{CDCl}_3$ )

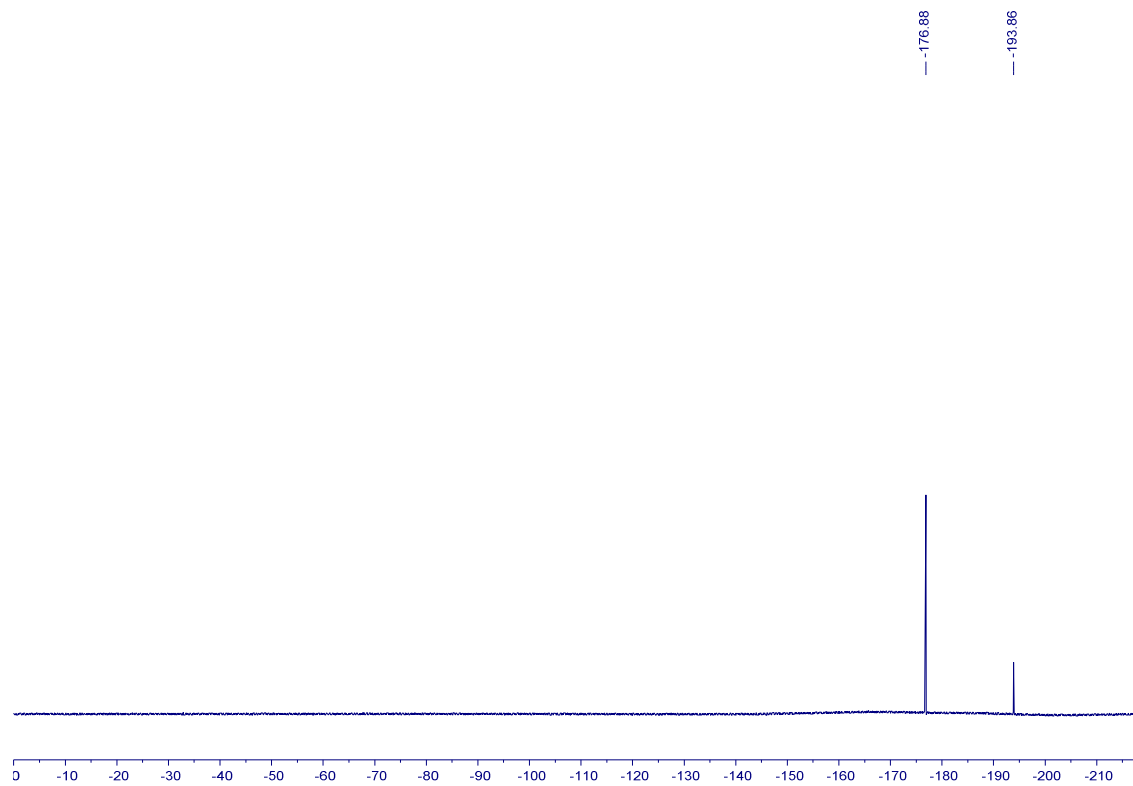

### 3j <sup>1</sup>H NMR (500 MHz, CDCl<sub>3</sub>)

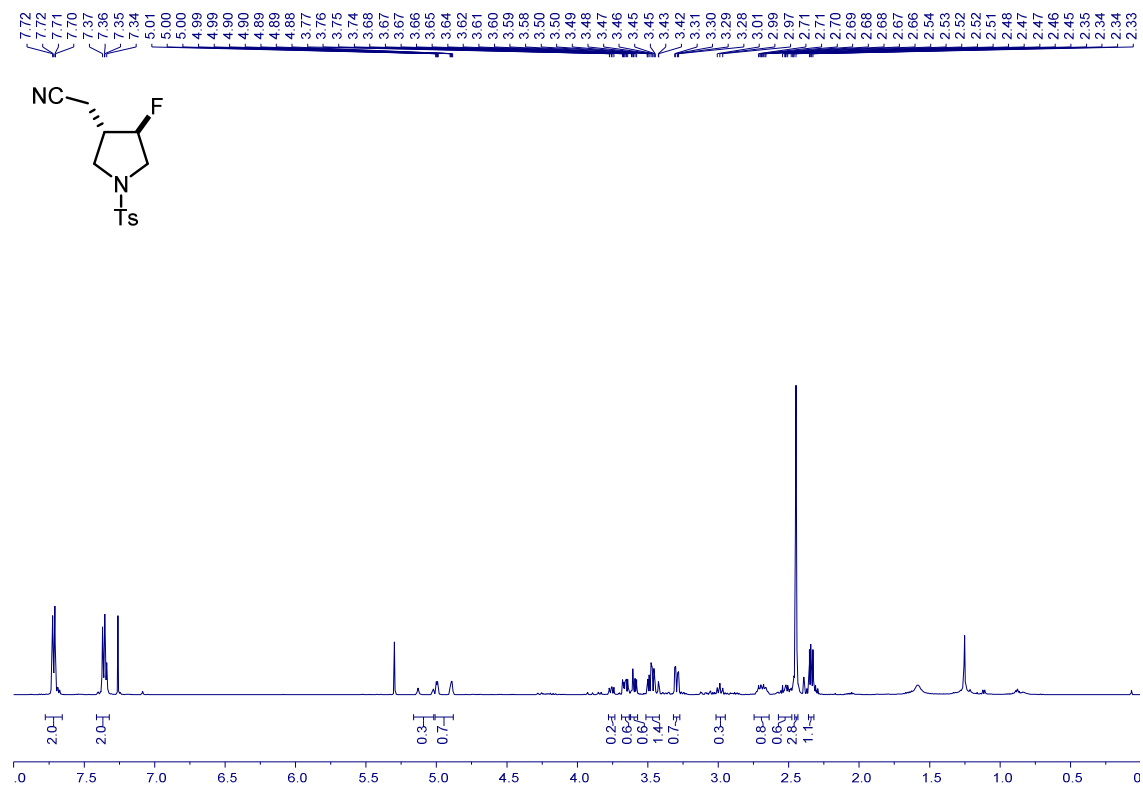

### 3j <sup>13</sup>C NMR (126 MHz, CDCl<sub>3</sub>)

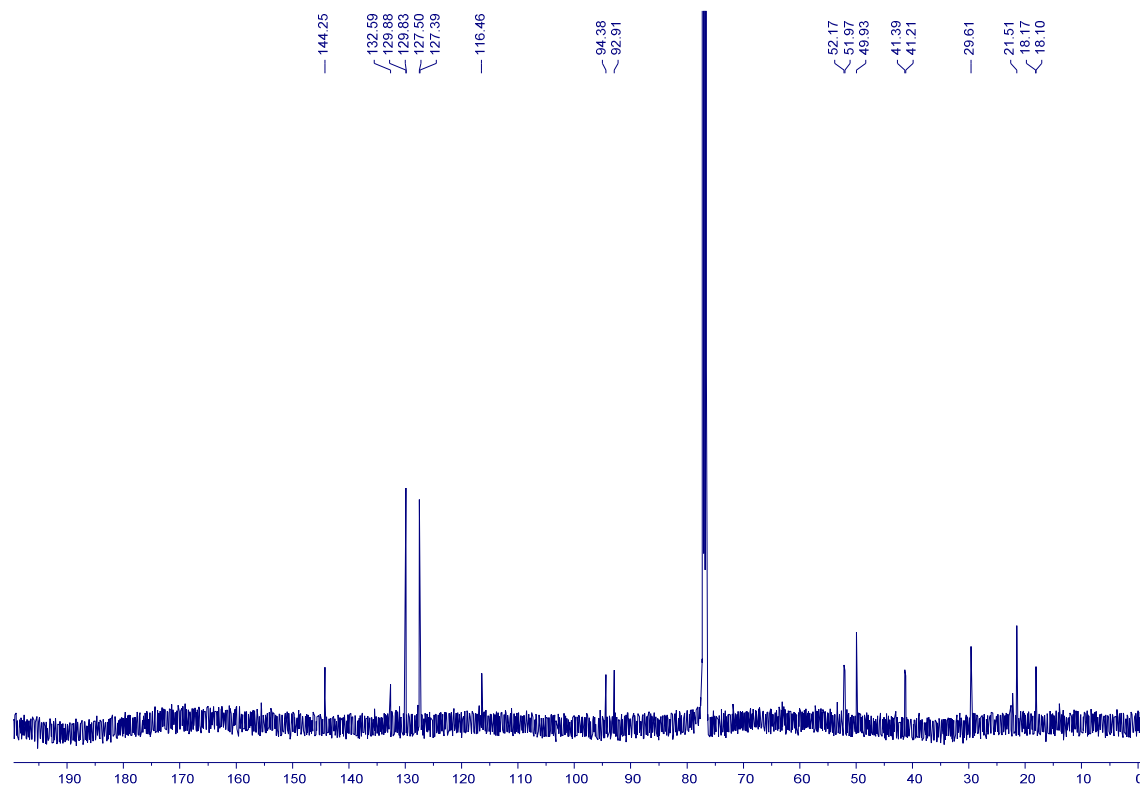

**3j**  $^{19}\text{F}$  NMR (376 MHz,  $\text{CDCl}_3$ )

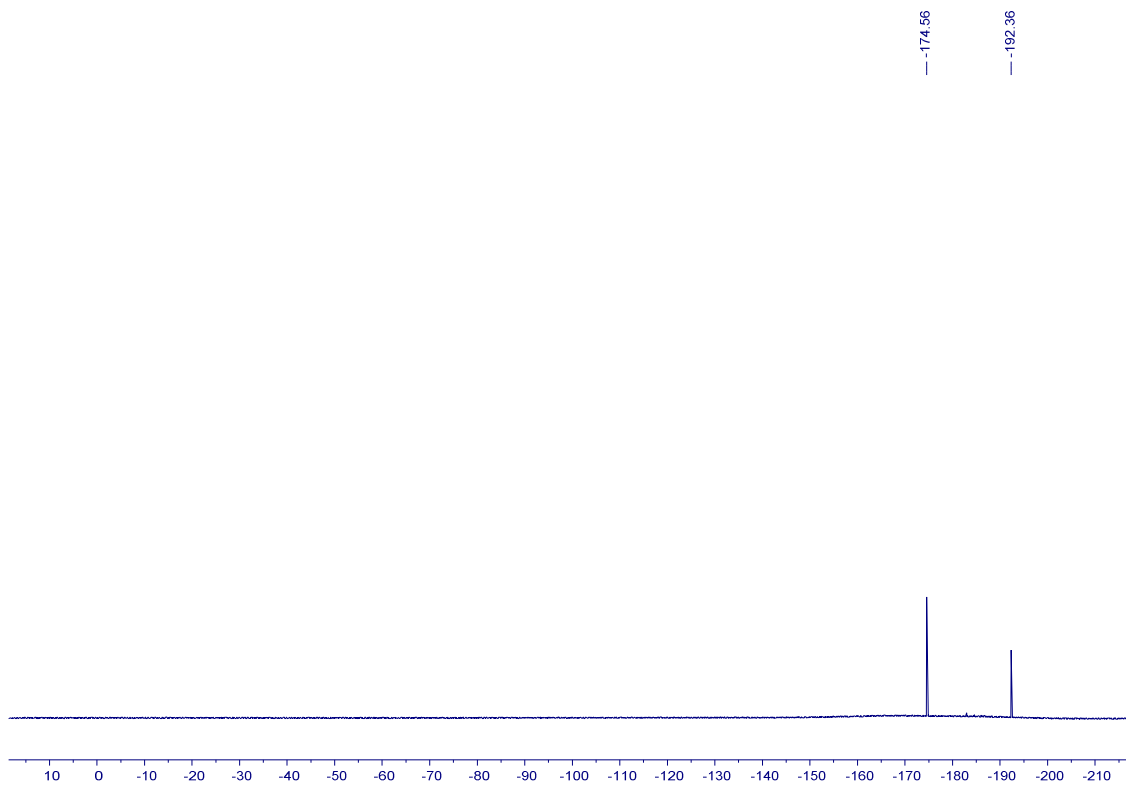

**3k**  $^1\text{H}$  NMR (500 MHz,  $\text{CDCl}_3$ )

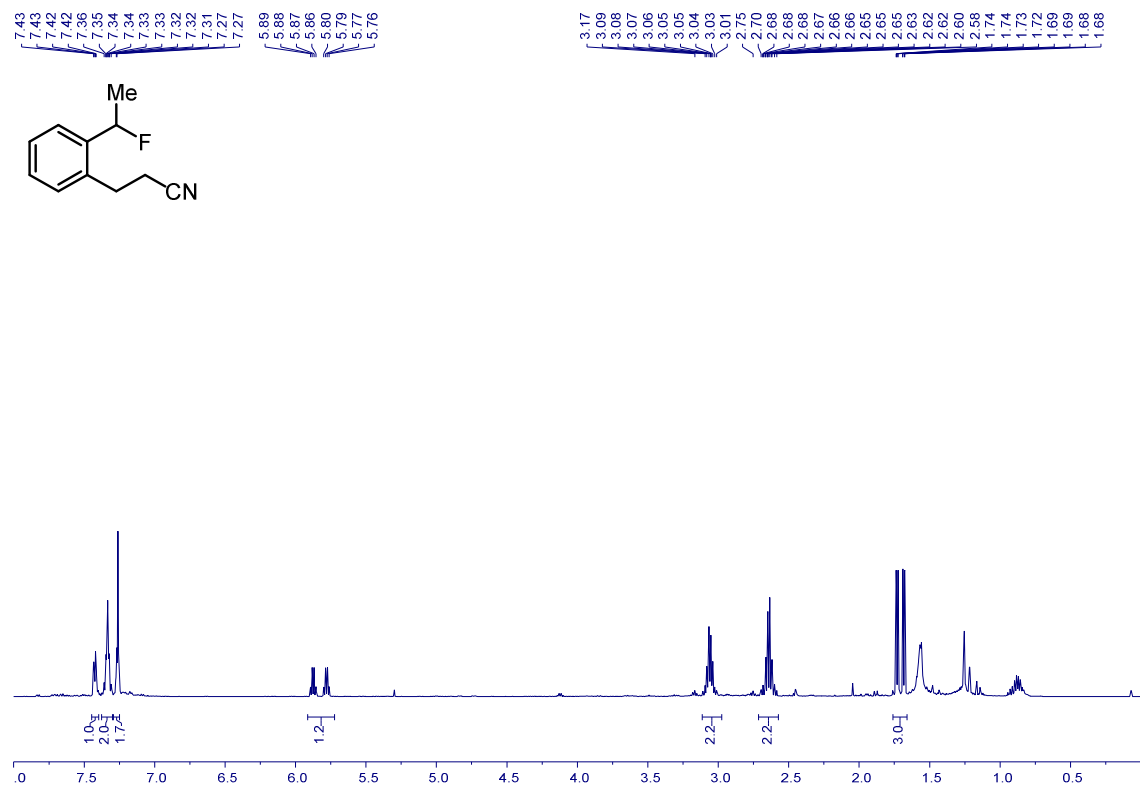

**3k**  $^{13}\text{C}$  NMR (126 MHz,  $\text{CDCl}_3$ )

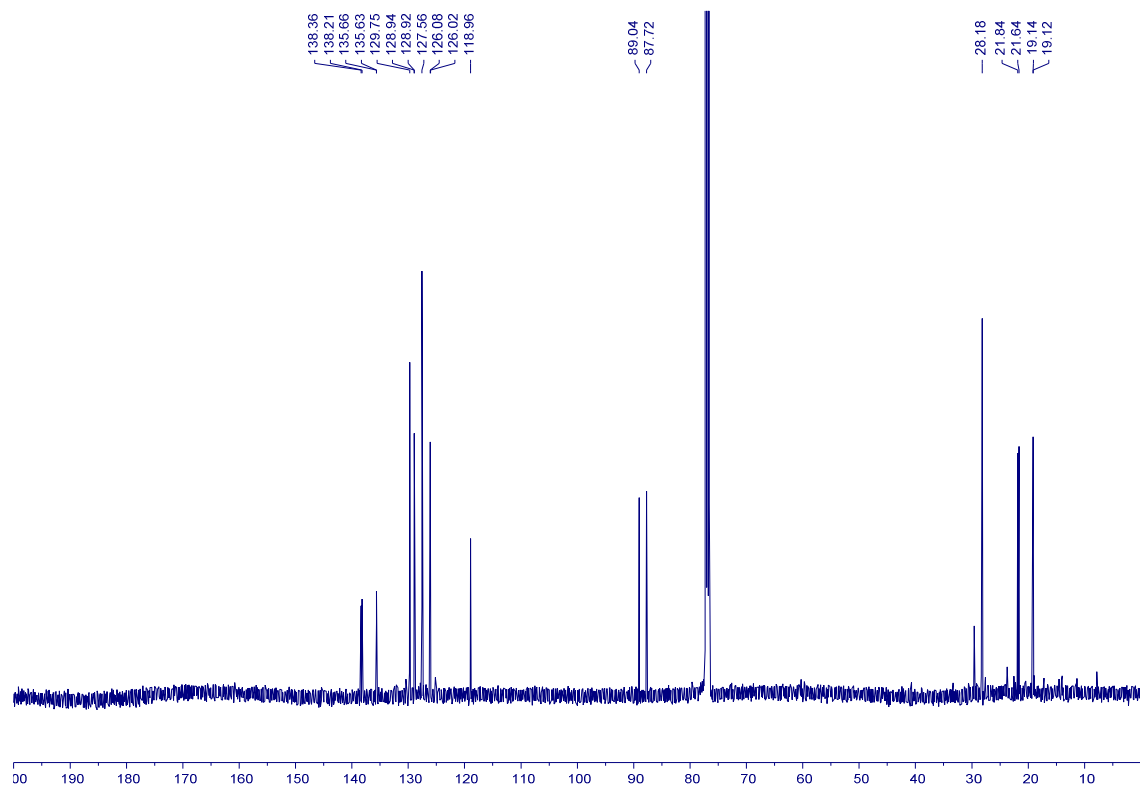

**3k**  $^{19}\text{F}$  NMR (376 MHz,  $\text{CDCl}_3$ )

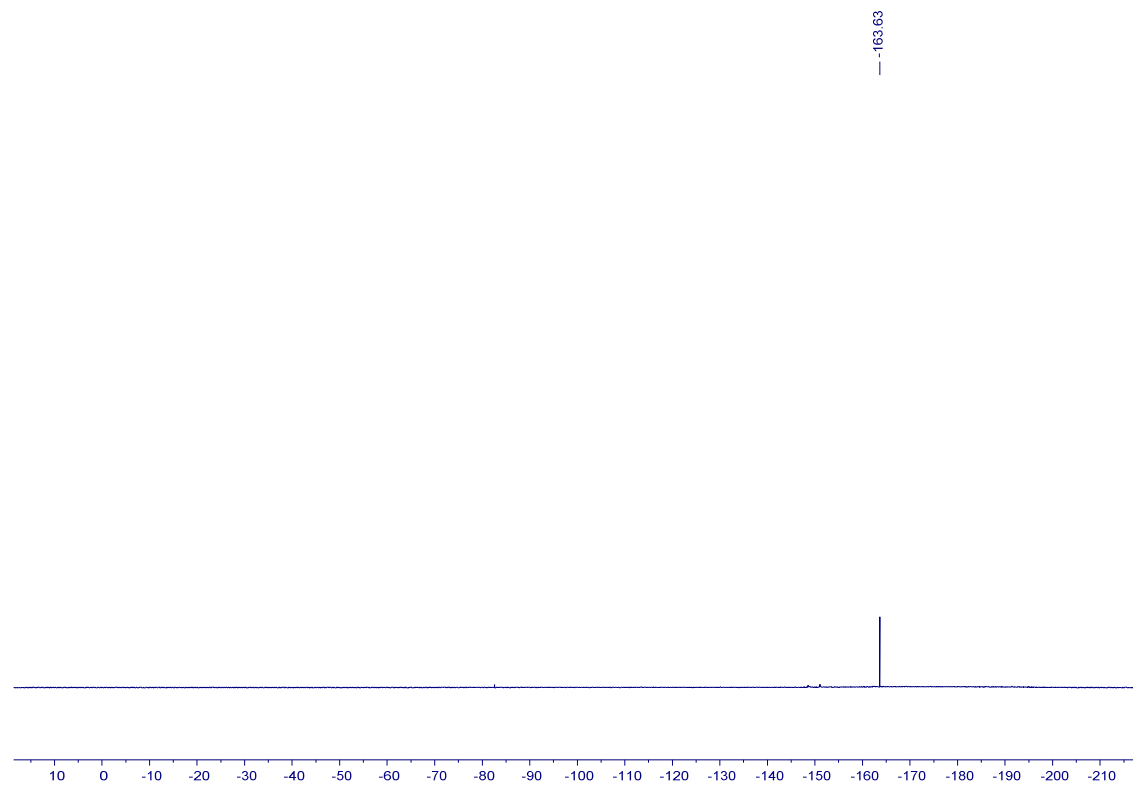

**3n**  $^1\text{H}$  NMR (500 MHz,  $\text{CDCl}_3$ )

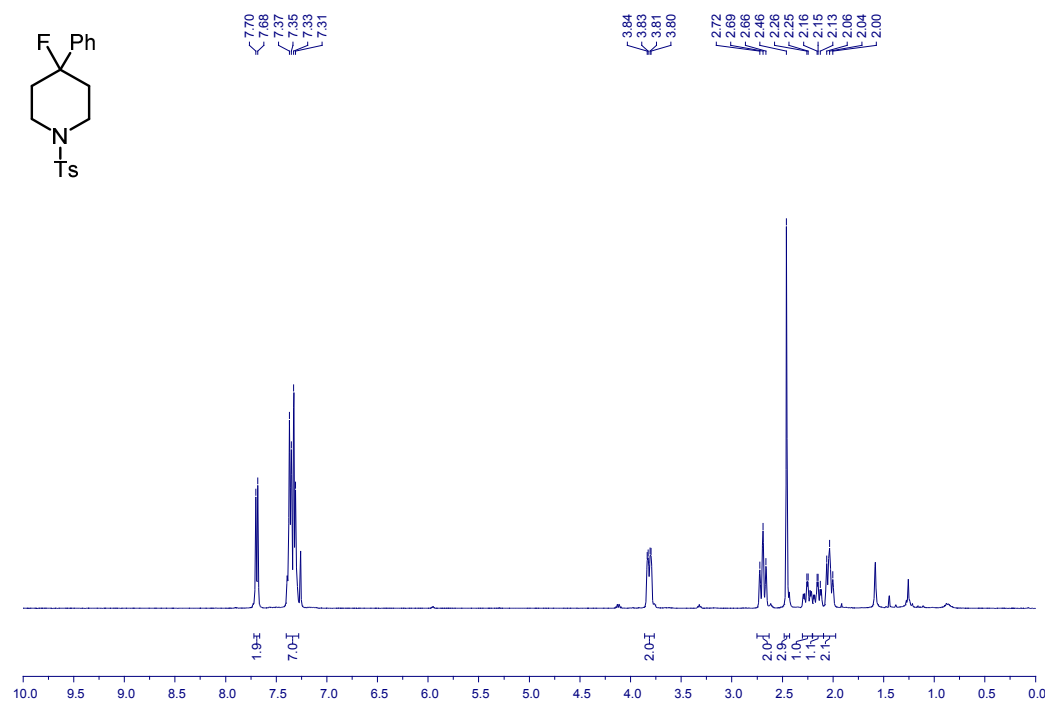

**3n**  $^{13}\text{C}$  NMR (126 MHz,  $\text{CDCl}_3$ )

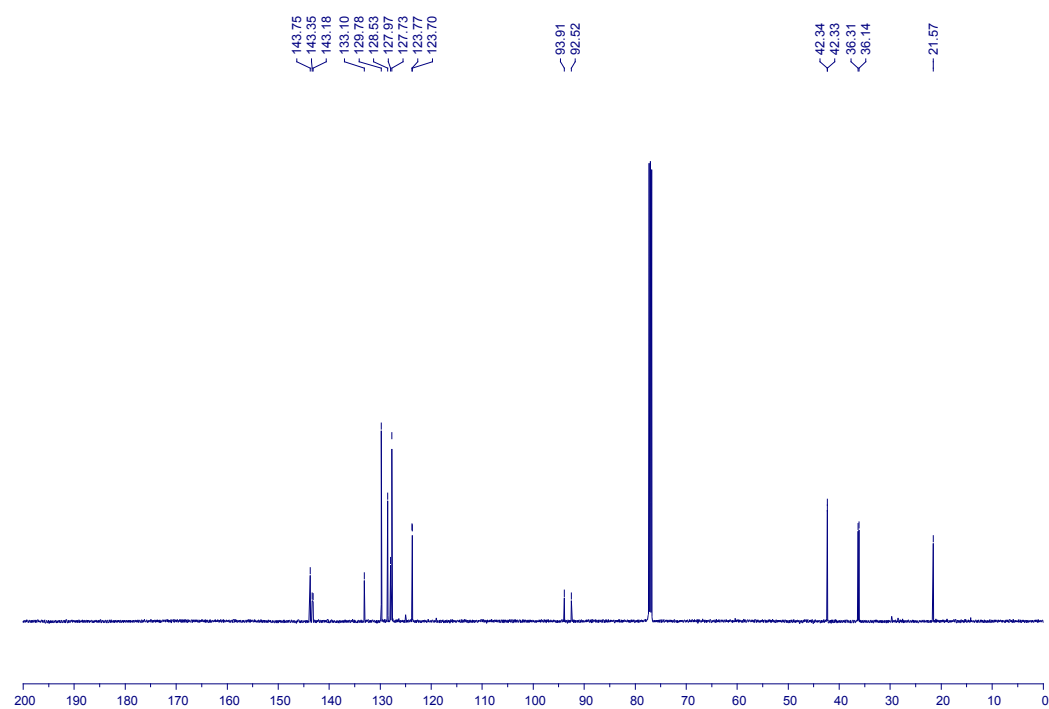



**3n**  $^1\text{F}$  NMR (376 MHz,  $\text{CDCl}_3$ )

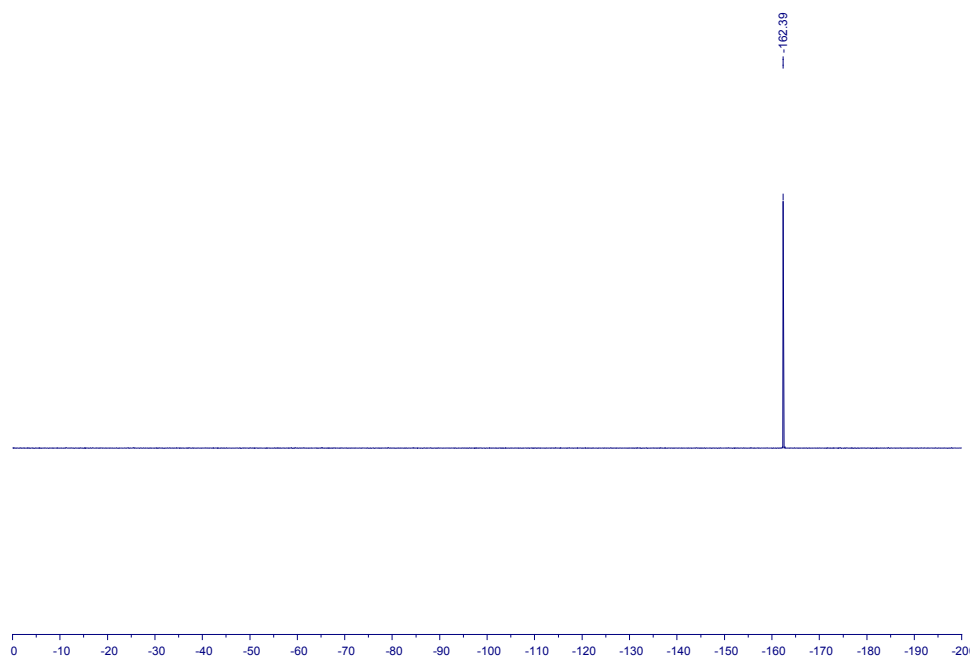

**3o**  $^1\text{H}$  NMR (376 MHz,  $\text{CDCl}_3$ )

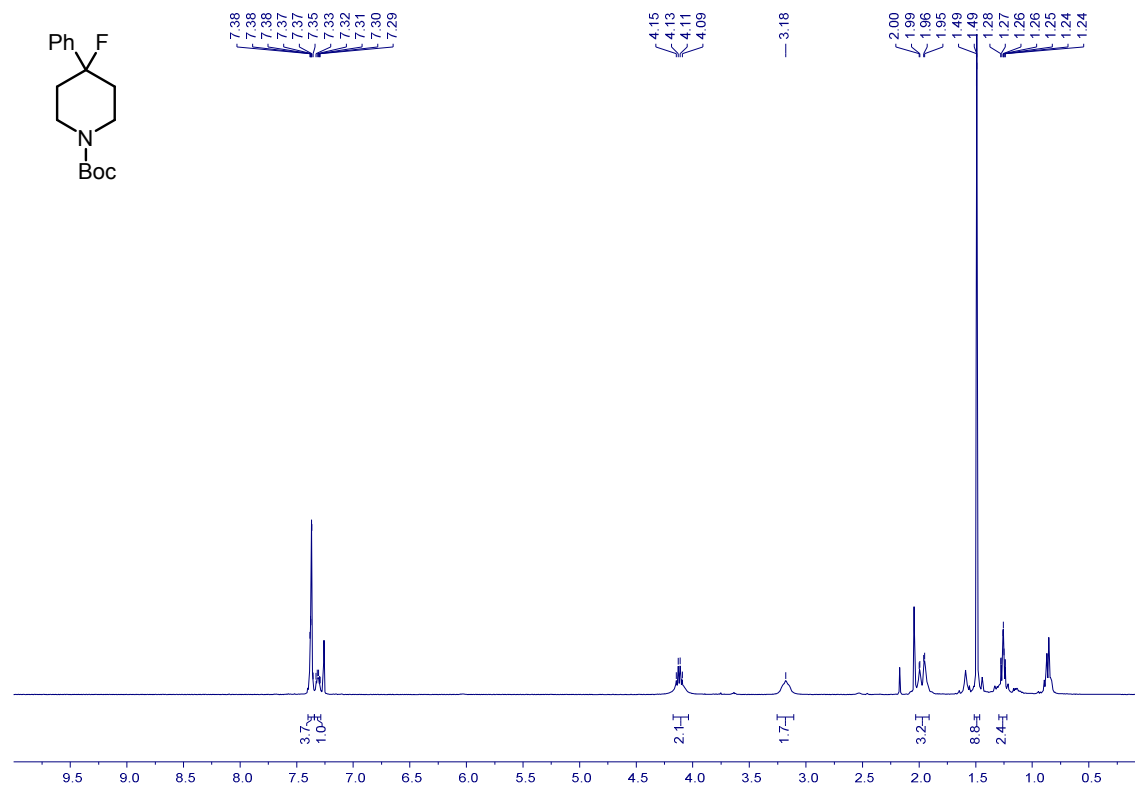

**3o**  $^{13}\text{C}$  NMR (376 MHz,  $\text{CDCl}_3$ )

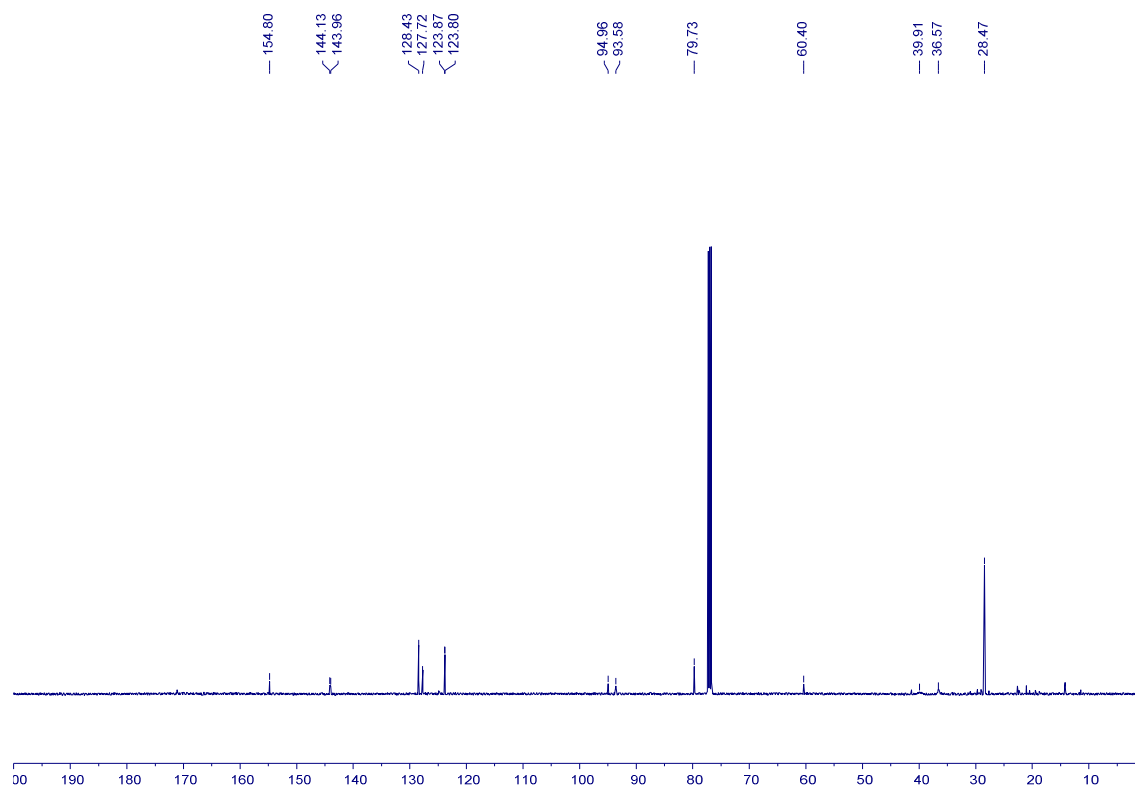

**3o**  $^{19}\text{F}$  NMR (376 MHz,  $\text{CDCl}_3$ )

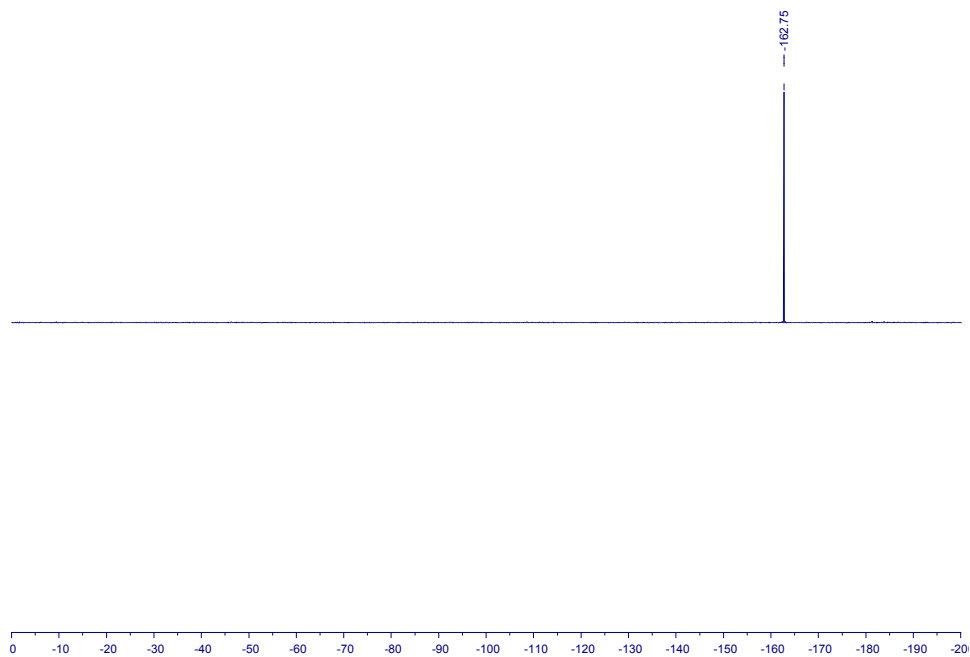

**3r**  $^1\text{H}$  NMR (400 MHz,  $\text{CDCl}_3$ )

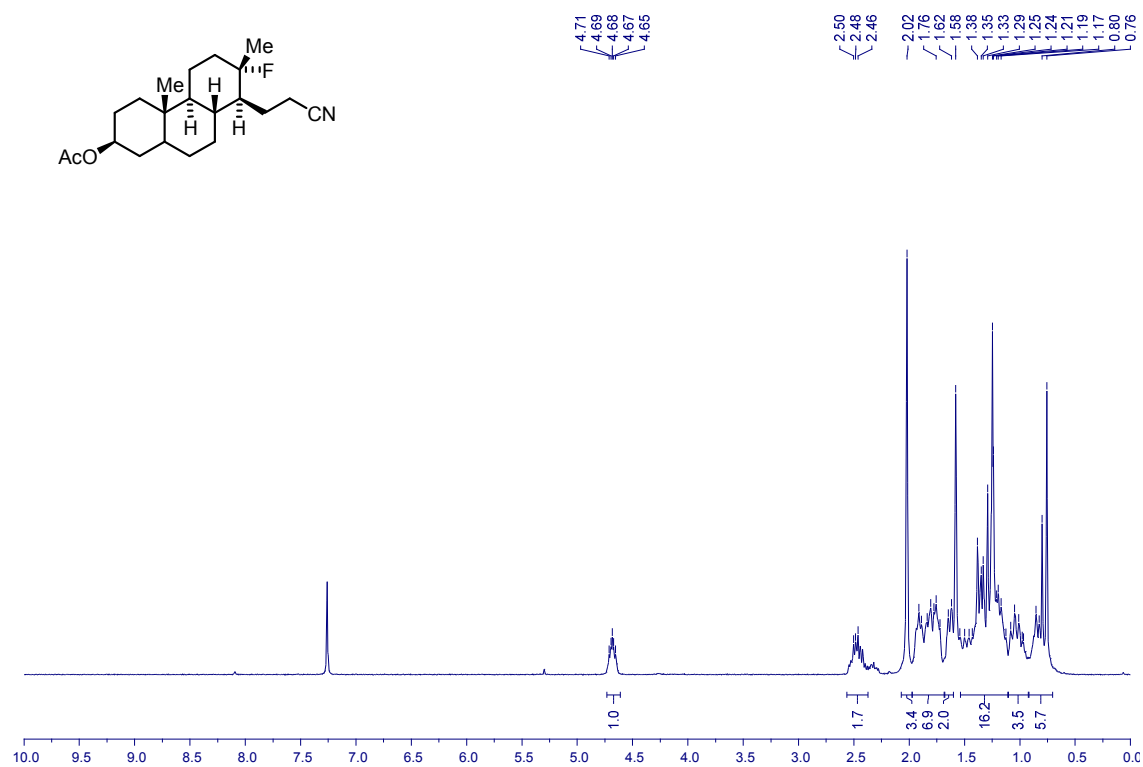

**3r**  $^{13}\text{C}$  NMR (126 MHz,  $\text{CDCl}_3$ )

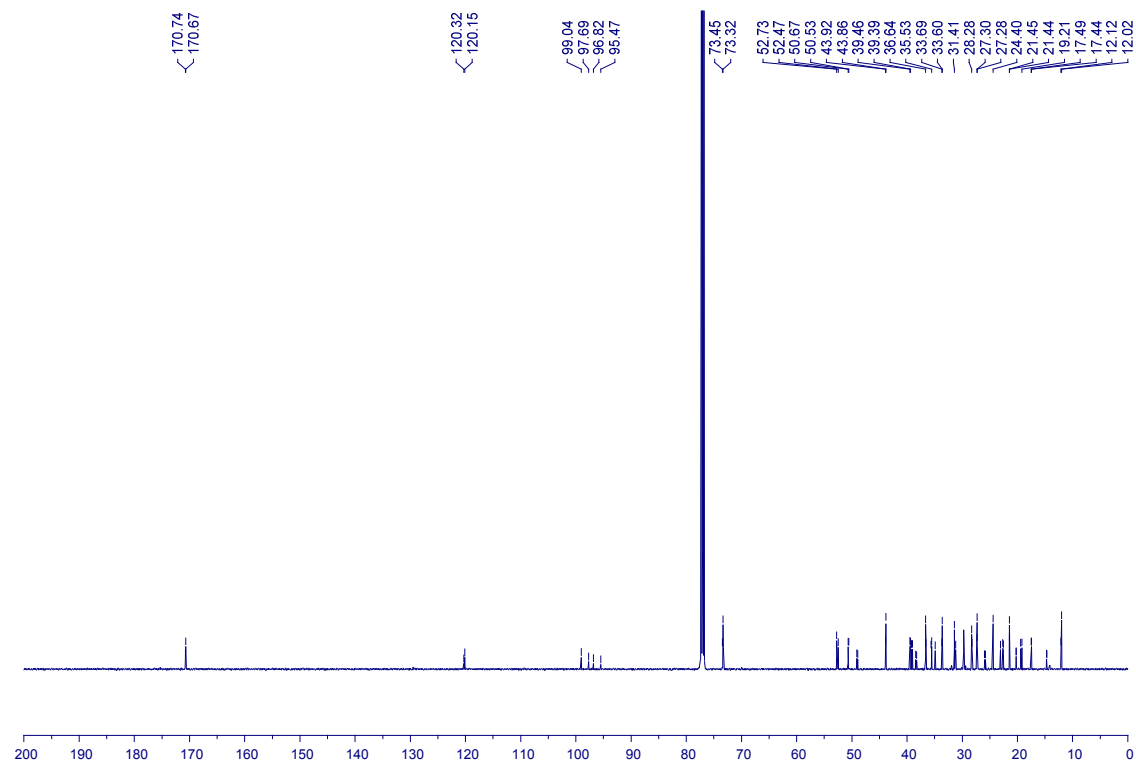

**3r**  $^{19}\text{F}$  NMR (376 MHz,  $\text{CDCl}_3$ )

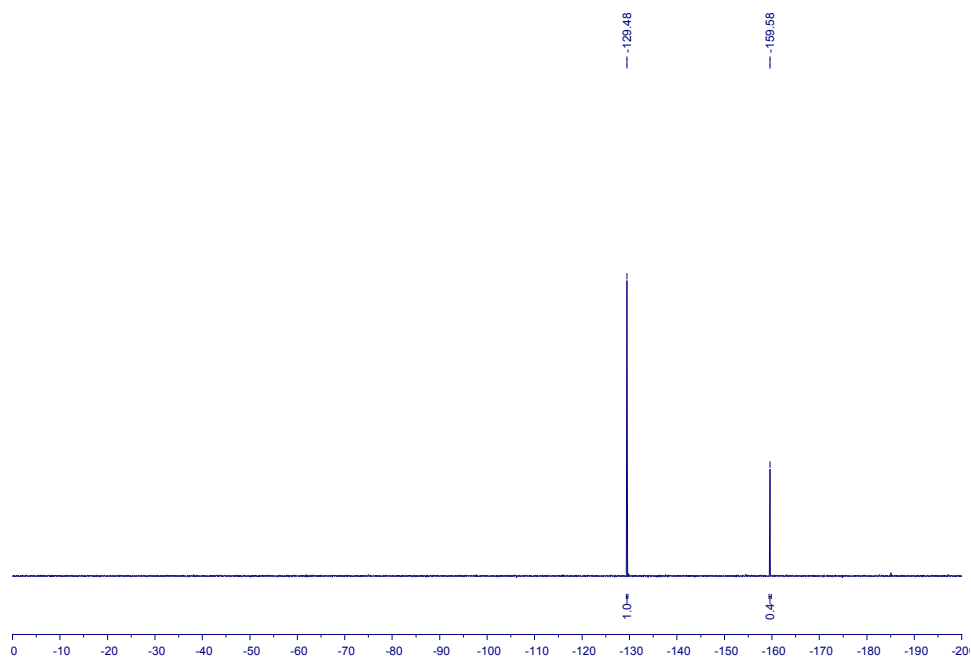

3s  $^1\text{H}$  NMR (400 MHz,  $\text{CDCl}_3$ )

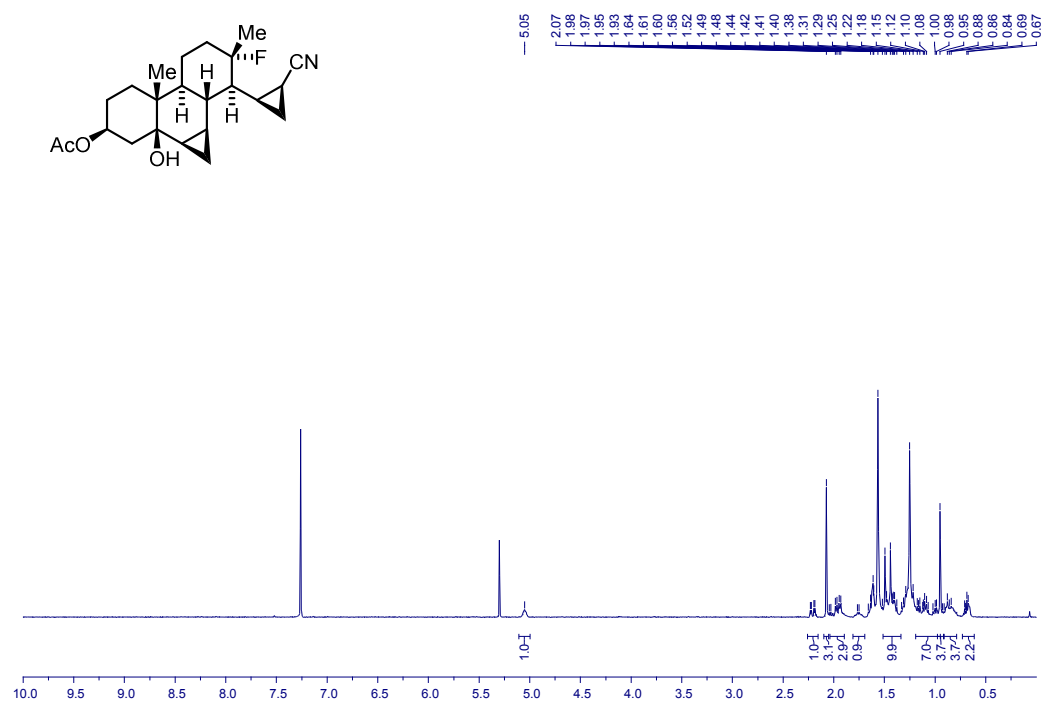

3s  $^{13}\text{C}$  NMR (126 MHz,  $\text{CDCl}_3$ )

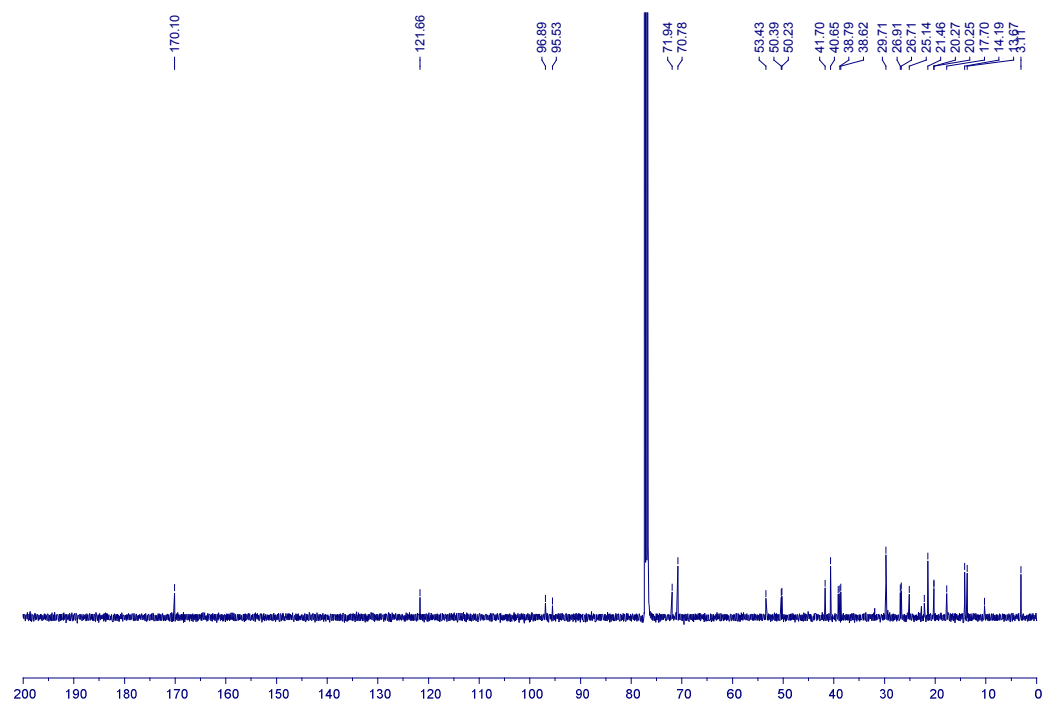

3s  $^{19}\text{F}$  NMR (376 MHz,  $\text{CDCl}_3$ )

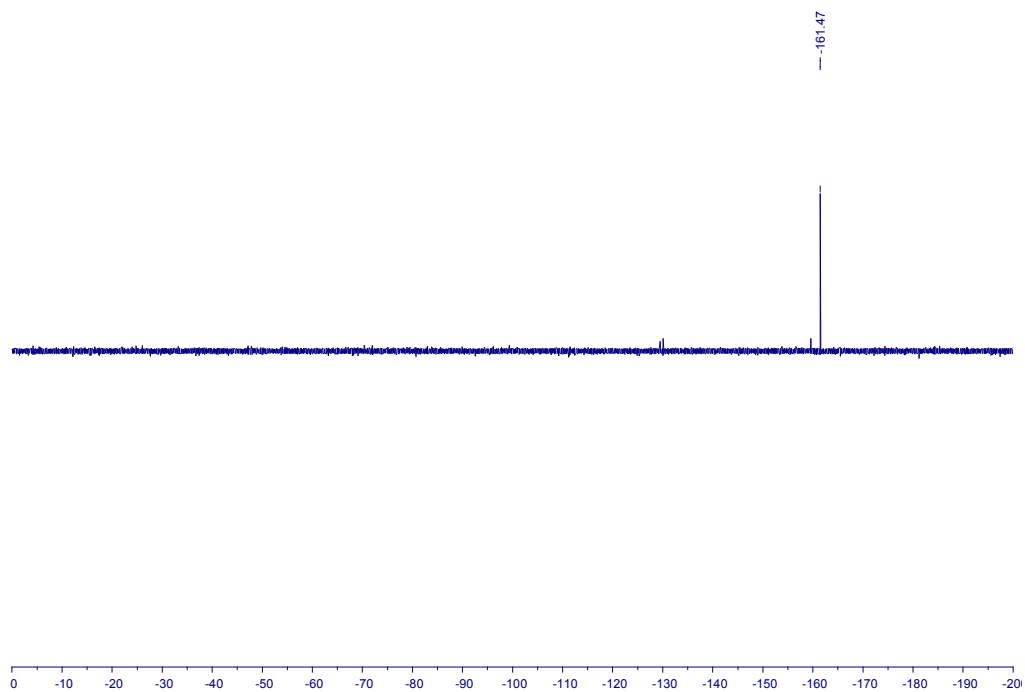

**3t**  $^1\text{H}$  NMR (500 MHz,  $\text{CDCl}_3$ )

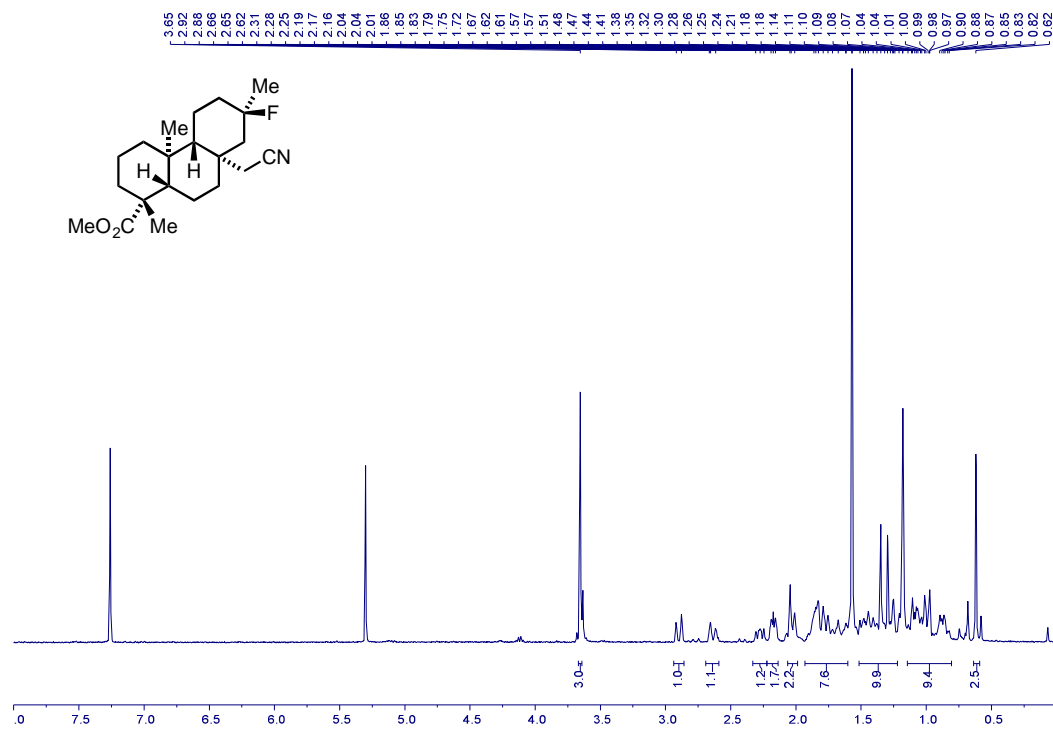

**3t**  $^{13}\text{C}$  NMR (126 MHz,  $\text{CDCl}_3$ )

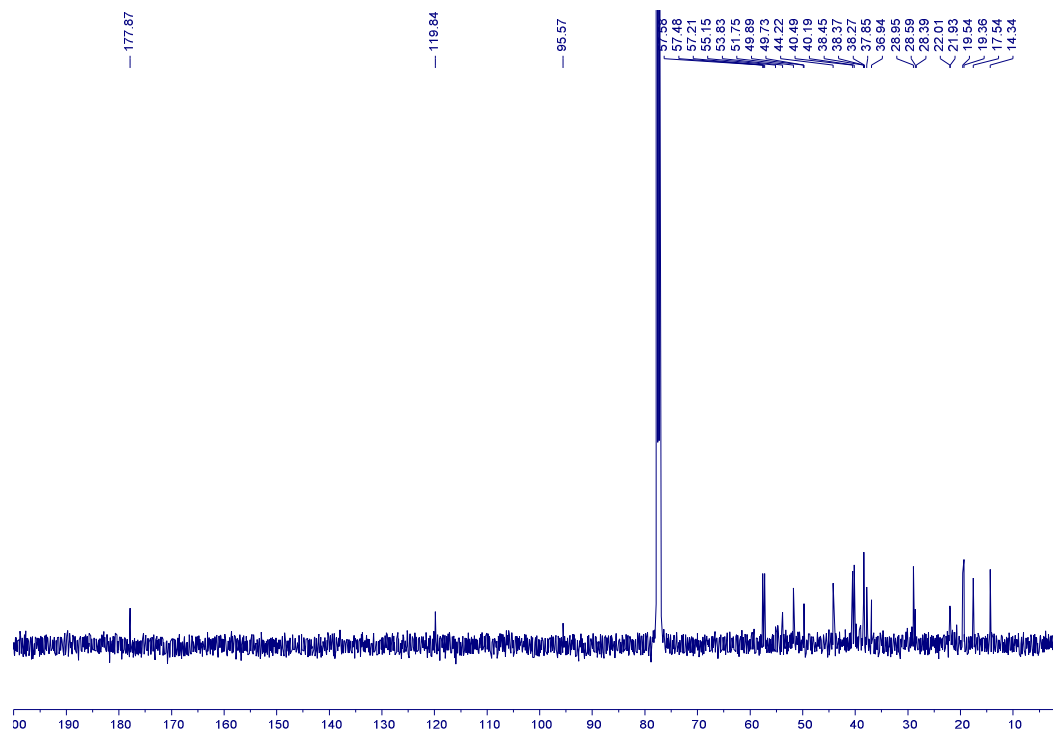



**3t**  $^{19}\text{F}$  NMR (471 MHz,  $\text{CDCl}_3$ )

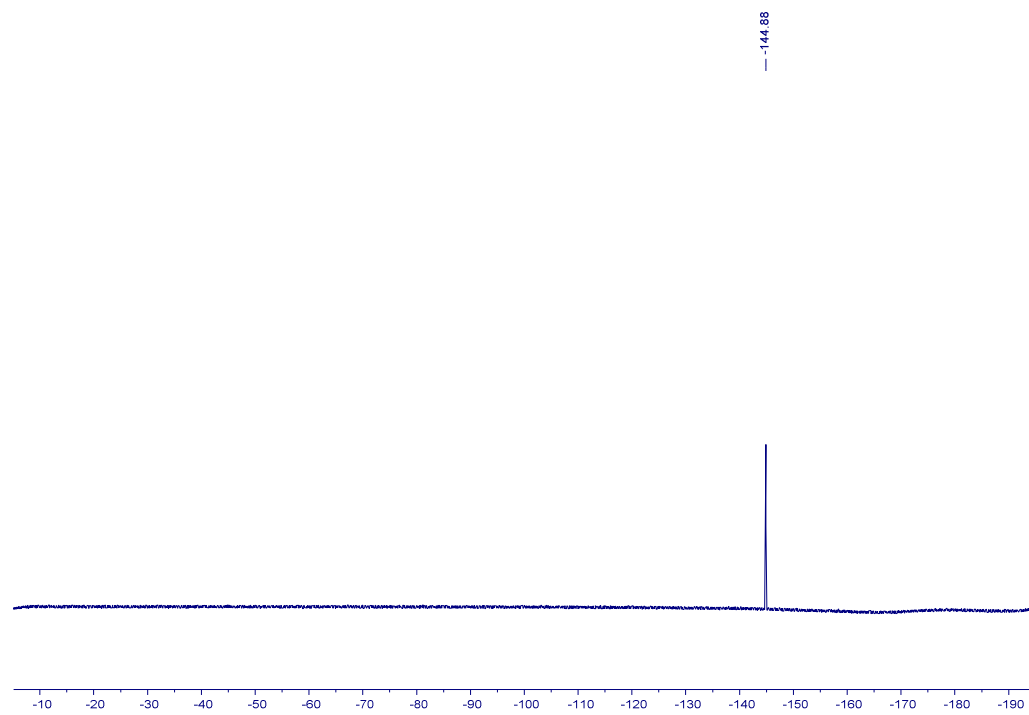

**4a**  $^1\text{H}$  NMR (400 MHz,  $\text{CDCl}_3$ )

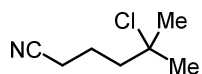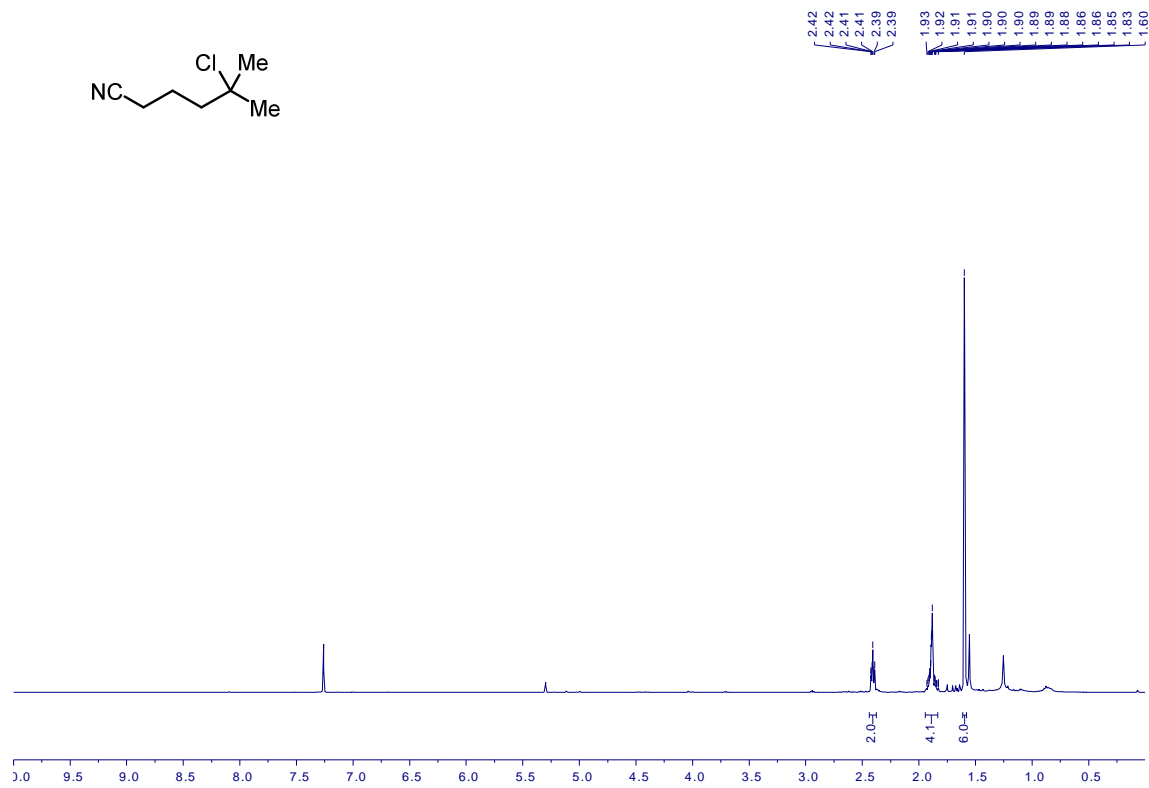

**4a**  $^{13}\text{C}$  NMR (126 MHz,  $\text{CDCl}_3$ )

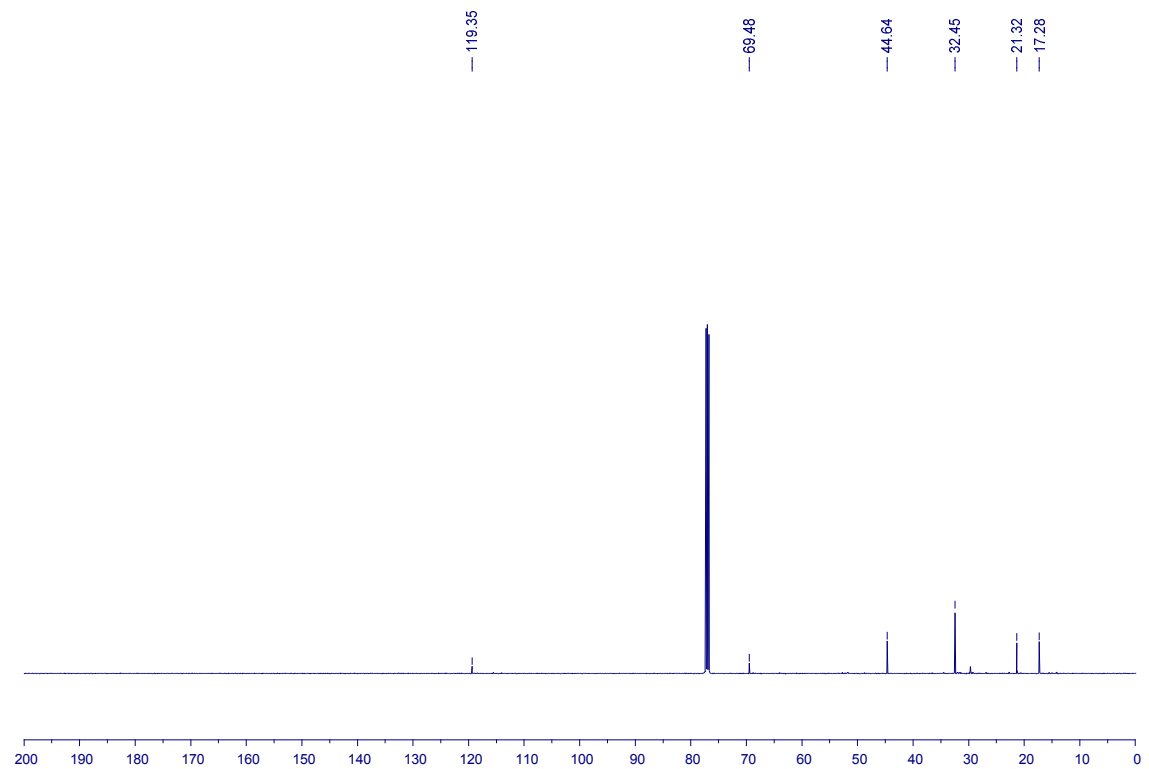

**4c**  $^1\text{H}$  NMR (400 MHz,  $\text{CDCl}_3$ )

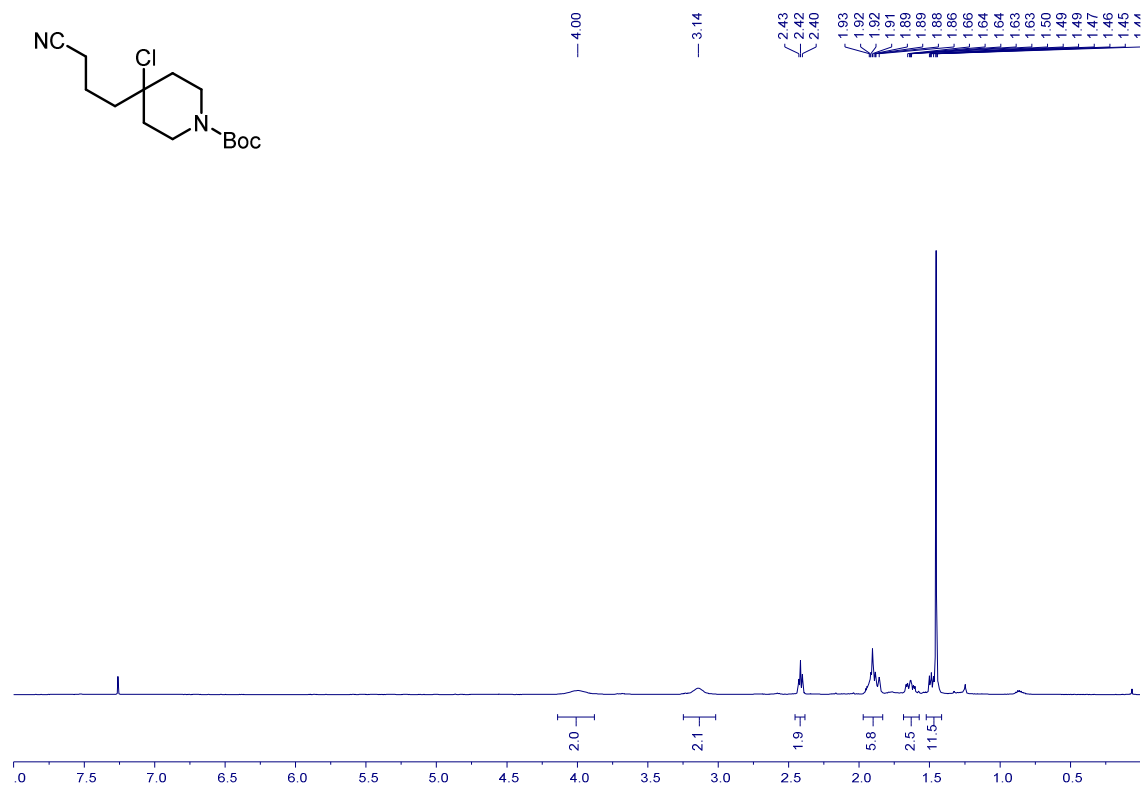

**4c**  $^{13}\text{C}$  NMR (126 MHz,  $\text{CDCl}_3$ )

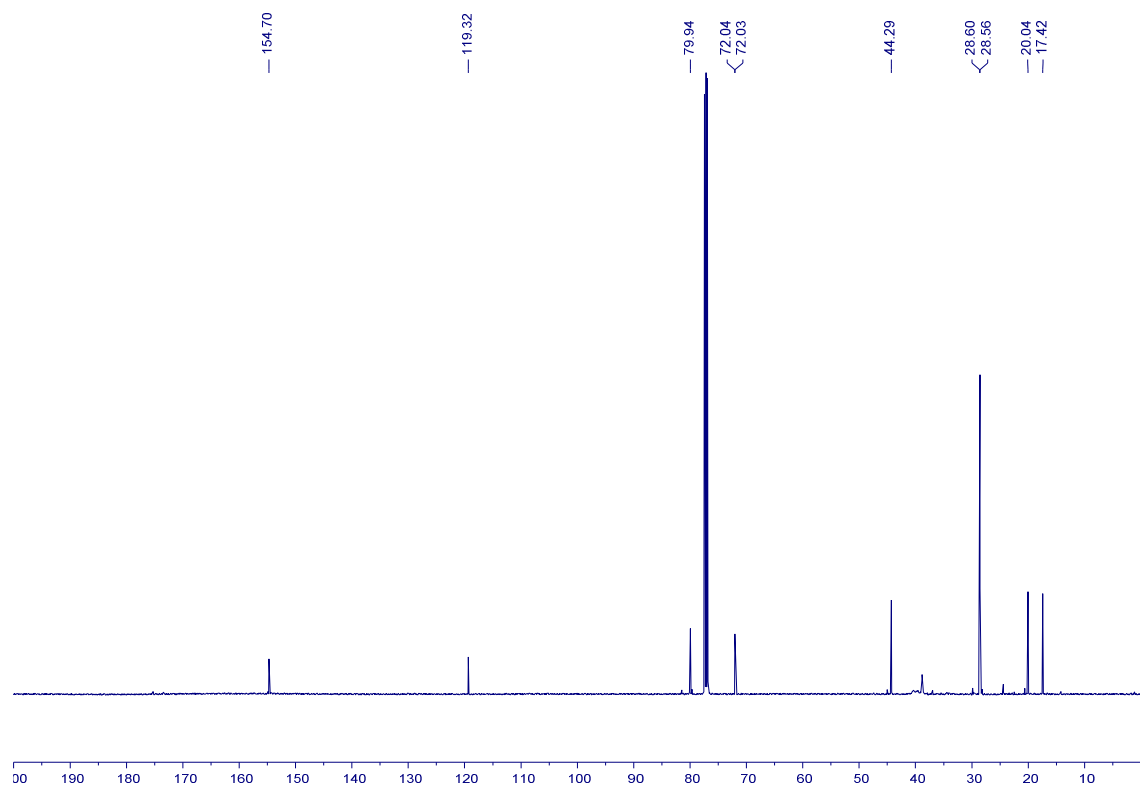

**4d**  $^1\text{H}$  NMR (400 MHz,  $\text{CDCl}_3$ )

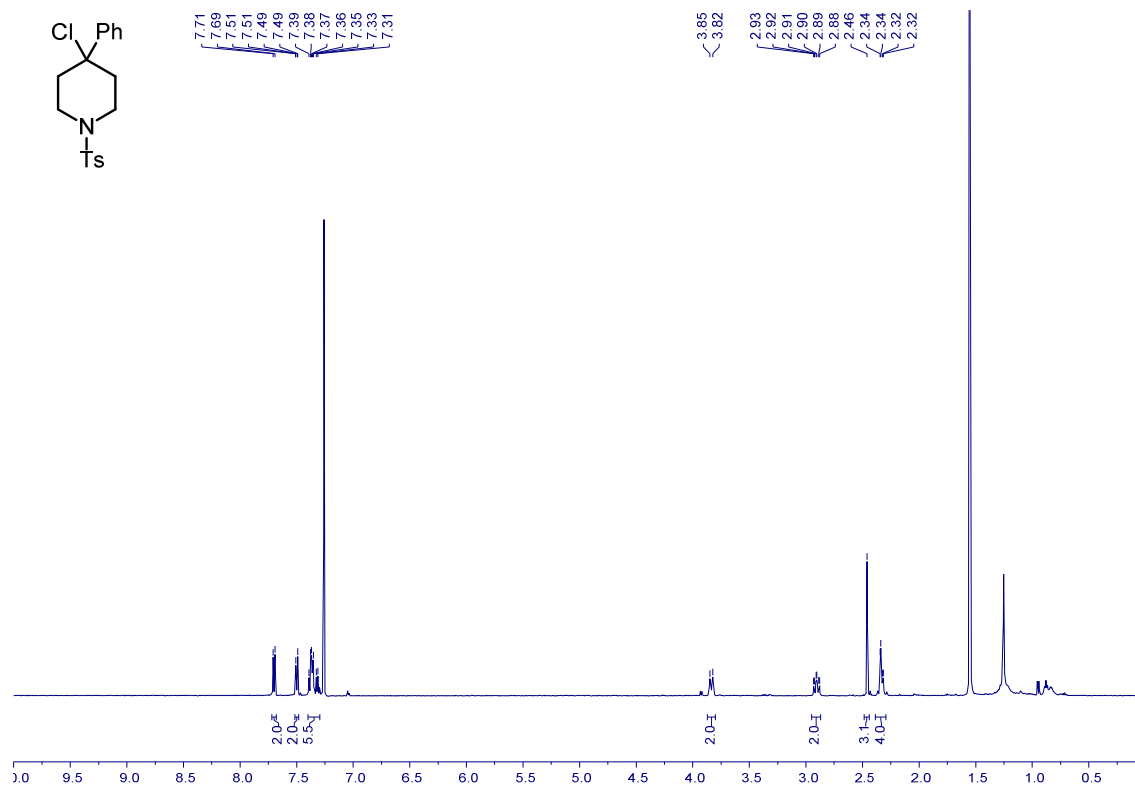

**4d**  $^{13}\text{C}$  NMR (126 MHz,  $\text{CDCl}_3$ )

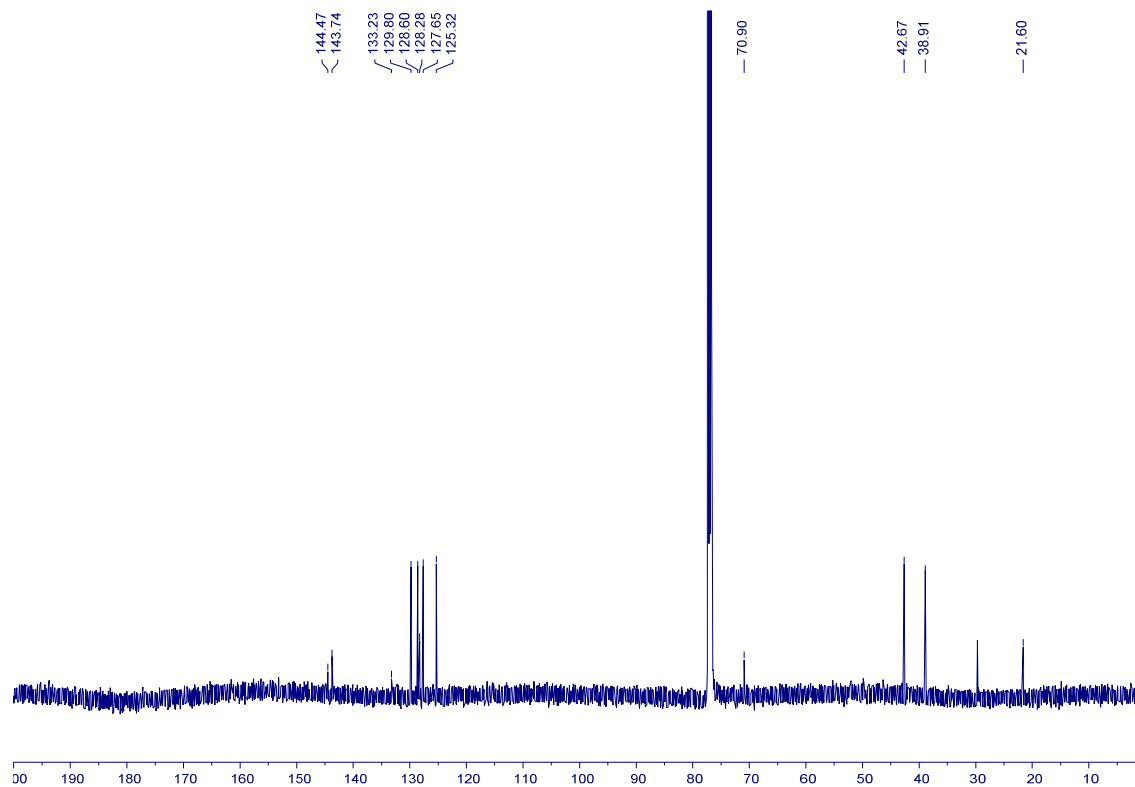

**4e**  $^1\text{H}$  NMR (400 MHz,  $\text{CDCl}_3$ )

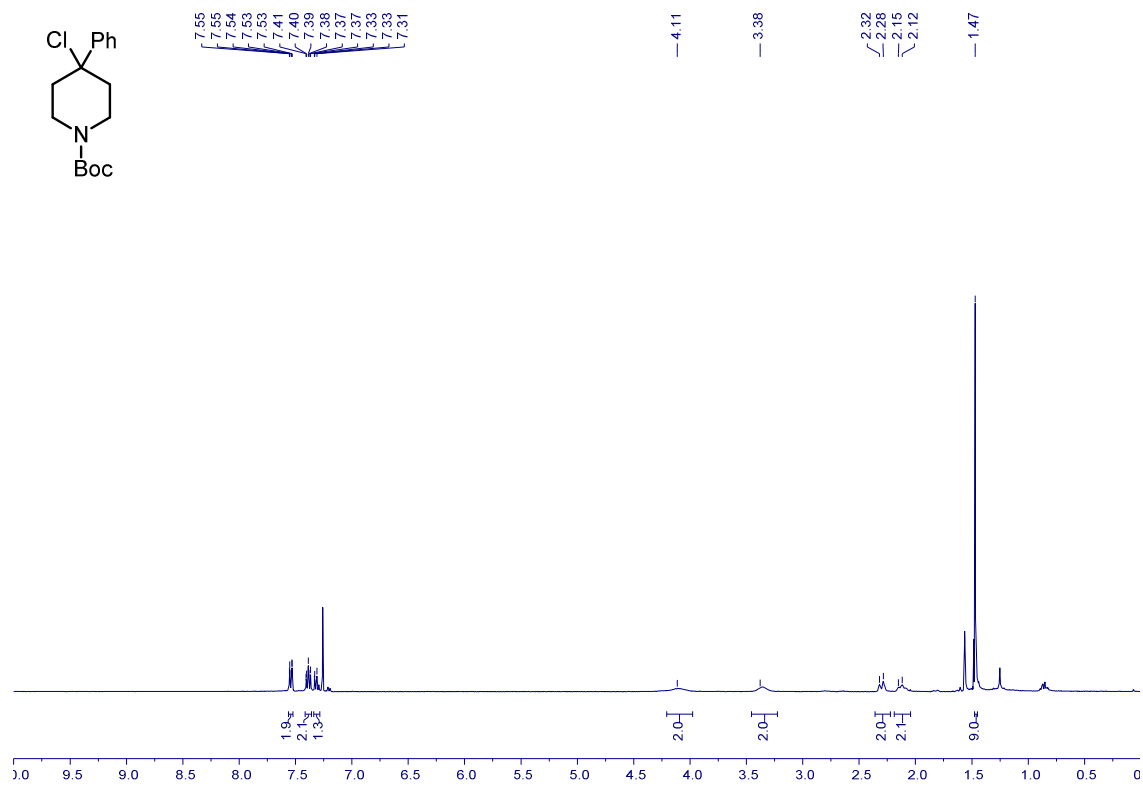

**4e**  $^{13}\text{C}$  NMR (126 MHz,  $\text{CDCl}_3$ )

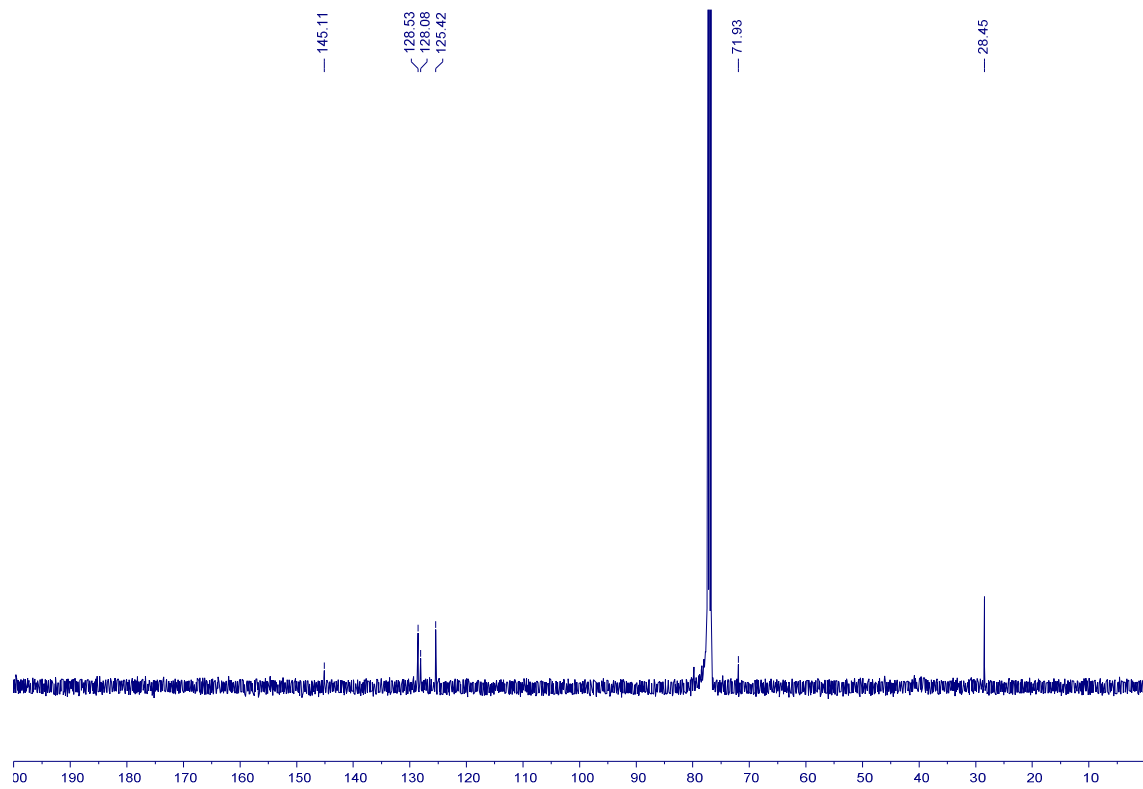

4f <sup>1</sup>H NMR (400 MHz, CDCl<sub>3</sub>)

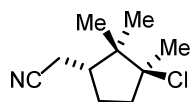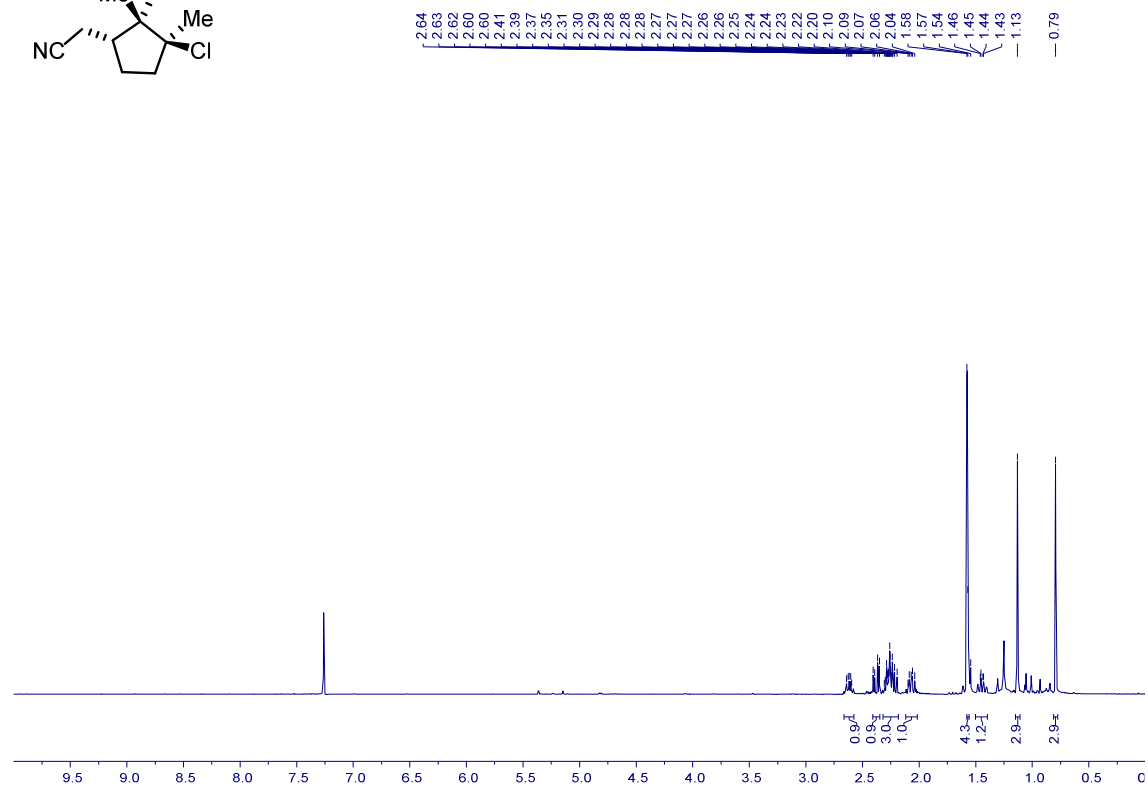

4f <sup>13</sup>C NMR (400 MHz, CDCl<sub>3</sub>)

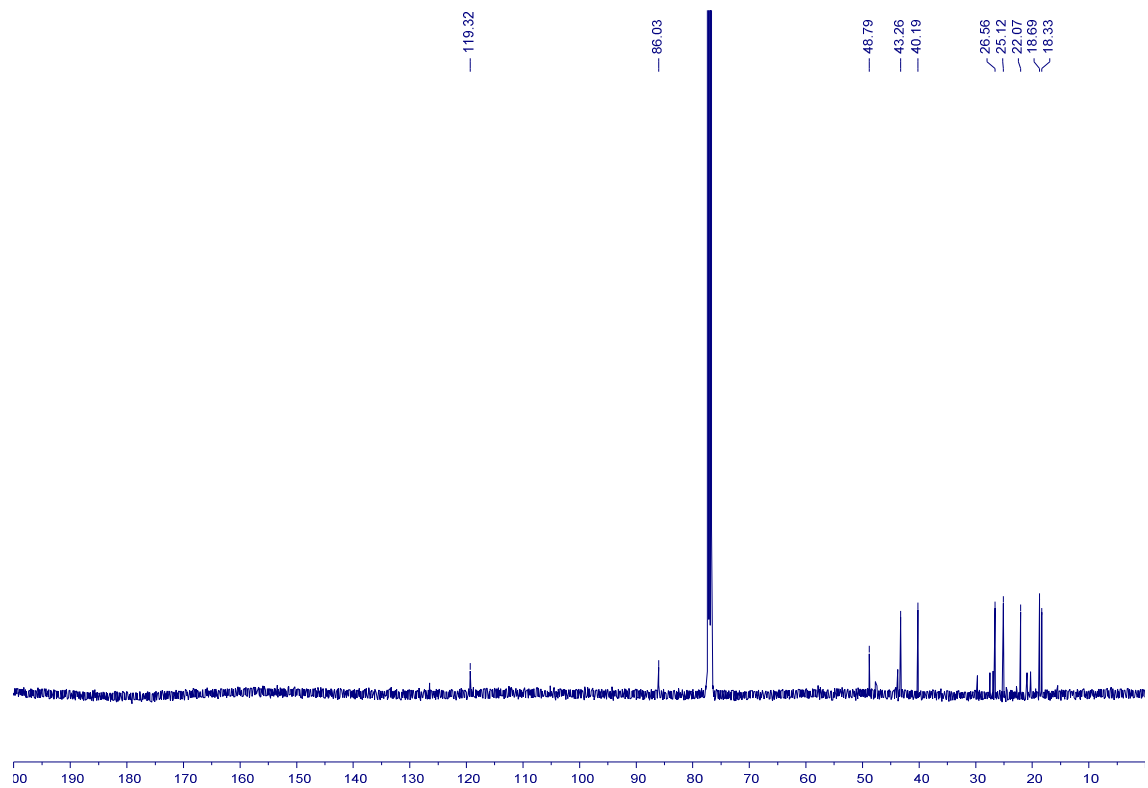

4g <sup>1</sup>H NMR (400 MHz, CDCl<sub>3</sub>)

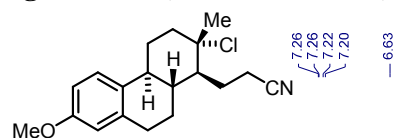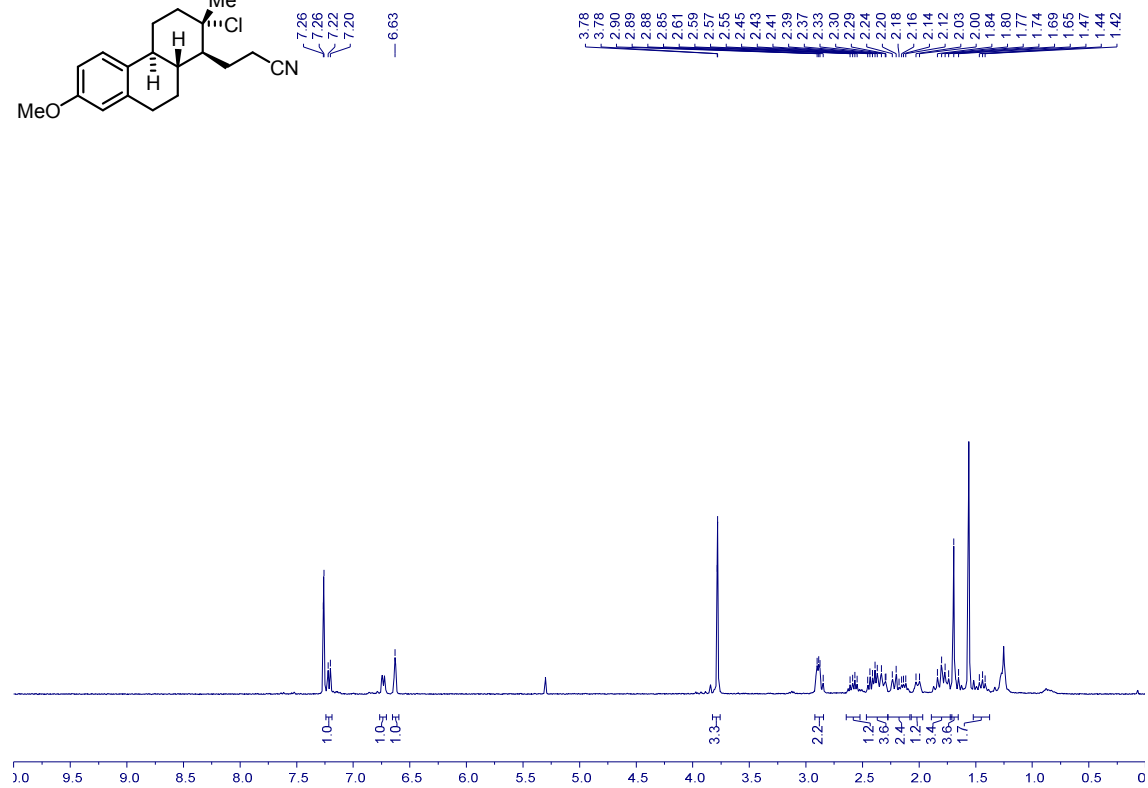

4g <sup>13</sup>C NMR (126 MHz, CDCl<sub>3</sub>)

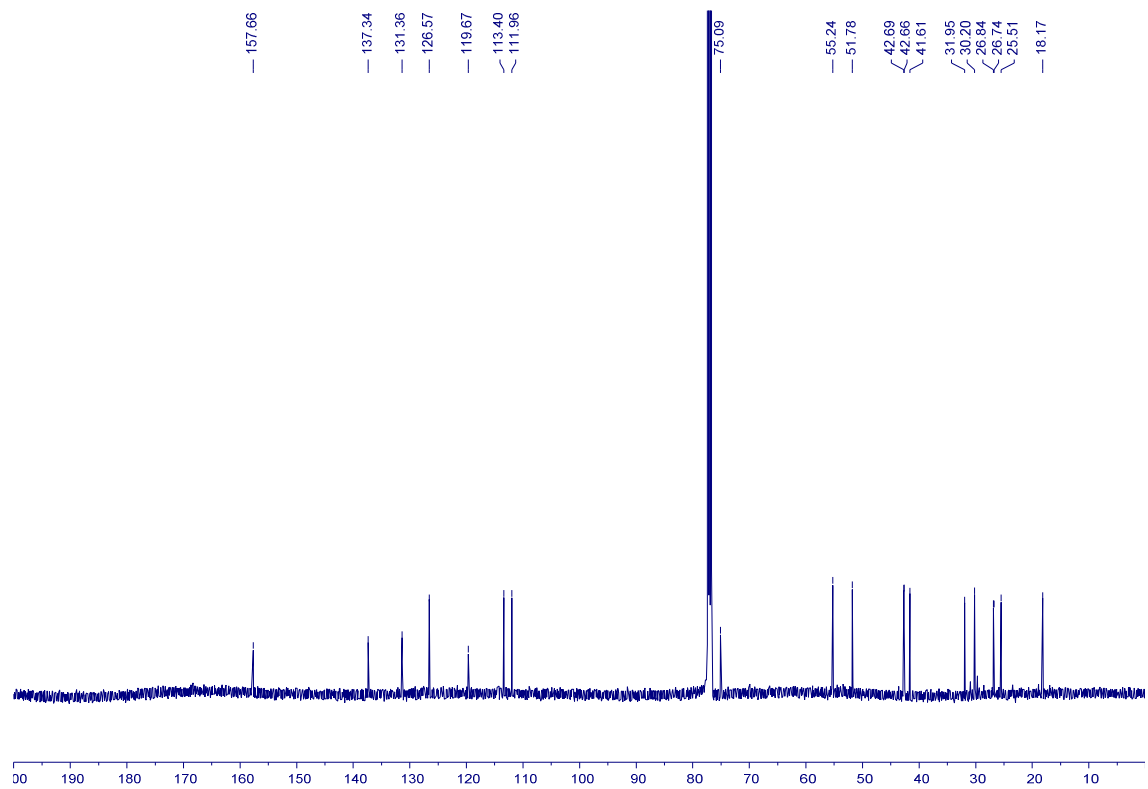

**4h**  $^1\text{H}$  NMR (400 MHz,  $\text{CDCl}_3$ )

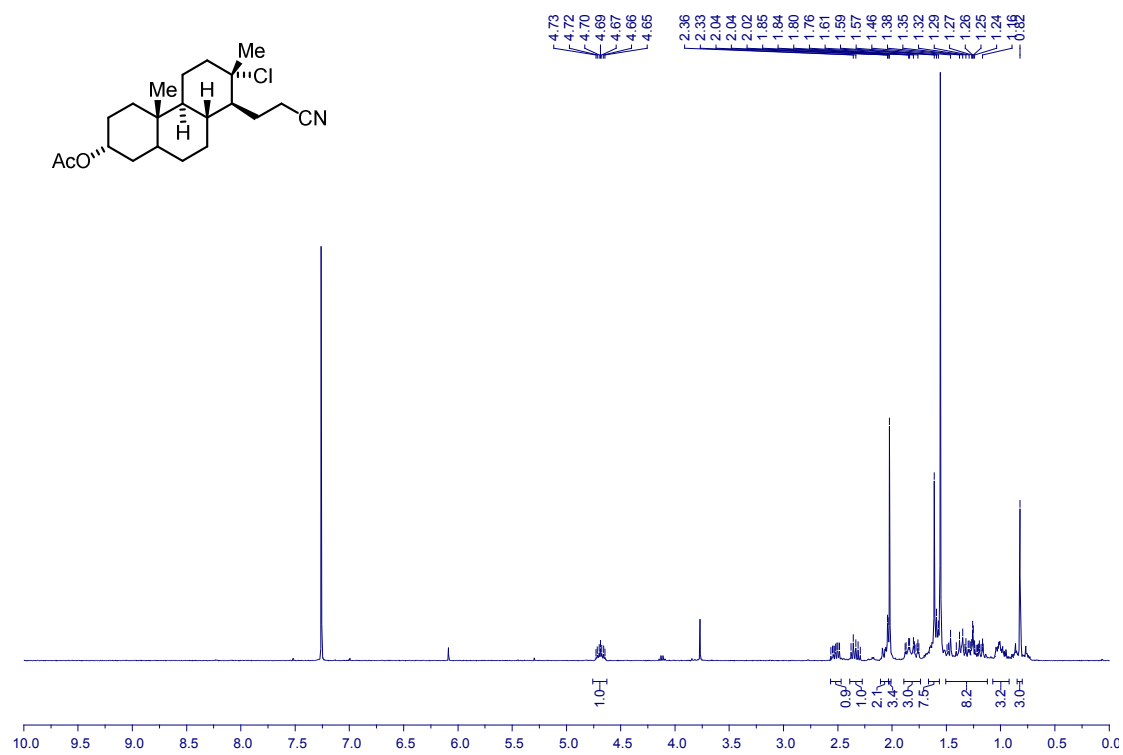

**4h**  $^{13}\text{C}$  NMR (126 MHz,  $\text{CDCl}_3$ )

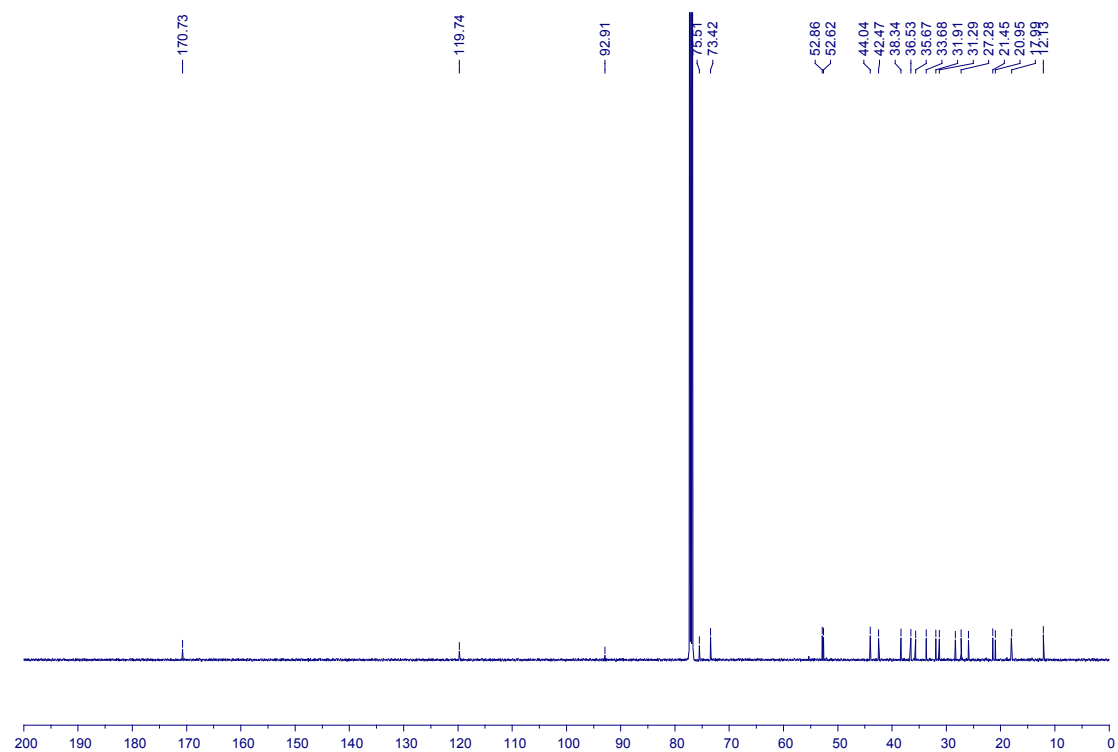





**4j**  $^1\text{H}$  NMR (400 MHz,  $\text{CDCl}_3$ )

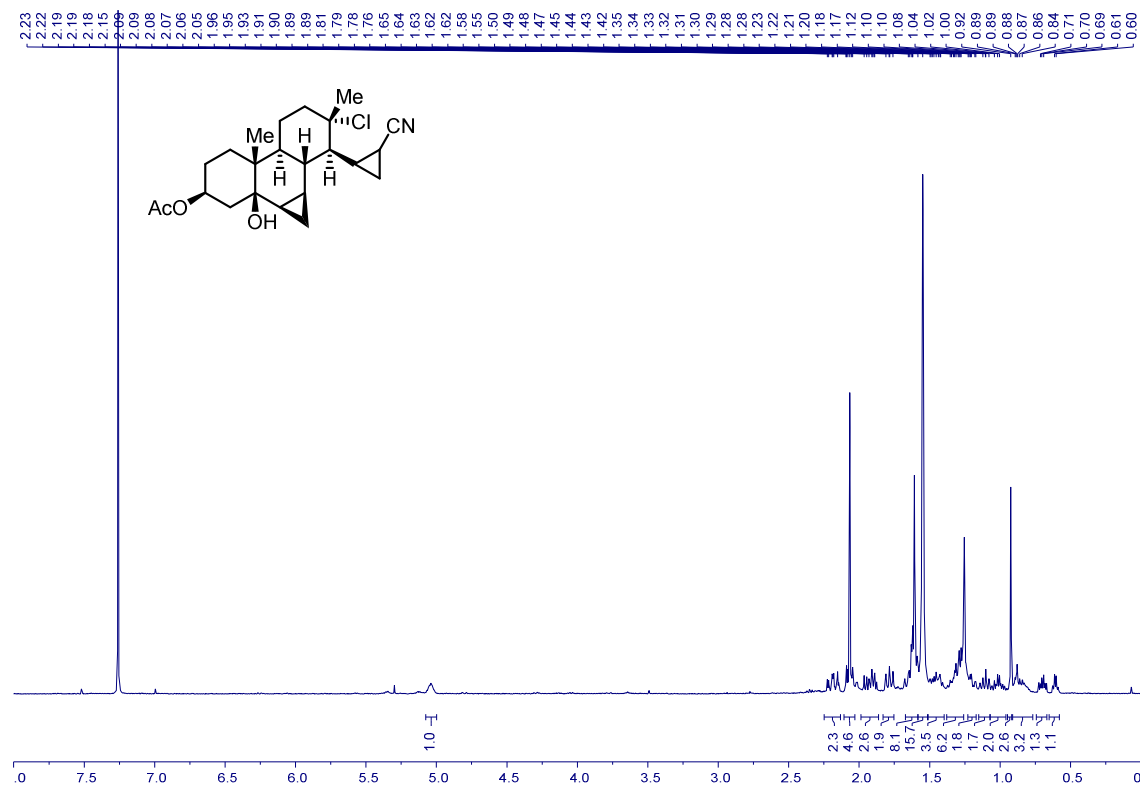

**4j**  $^{13}\text{C}$  NMR (101 MHz,  $\text{CDCl}_3$ )

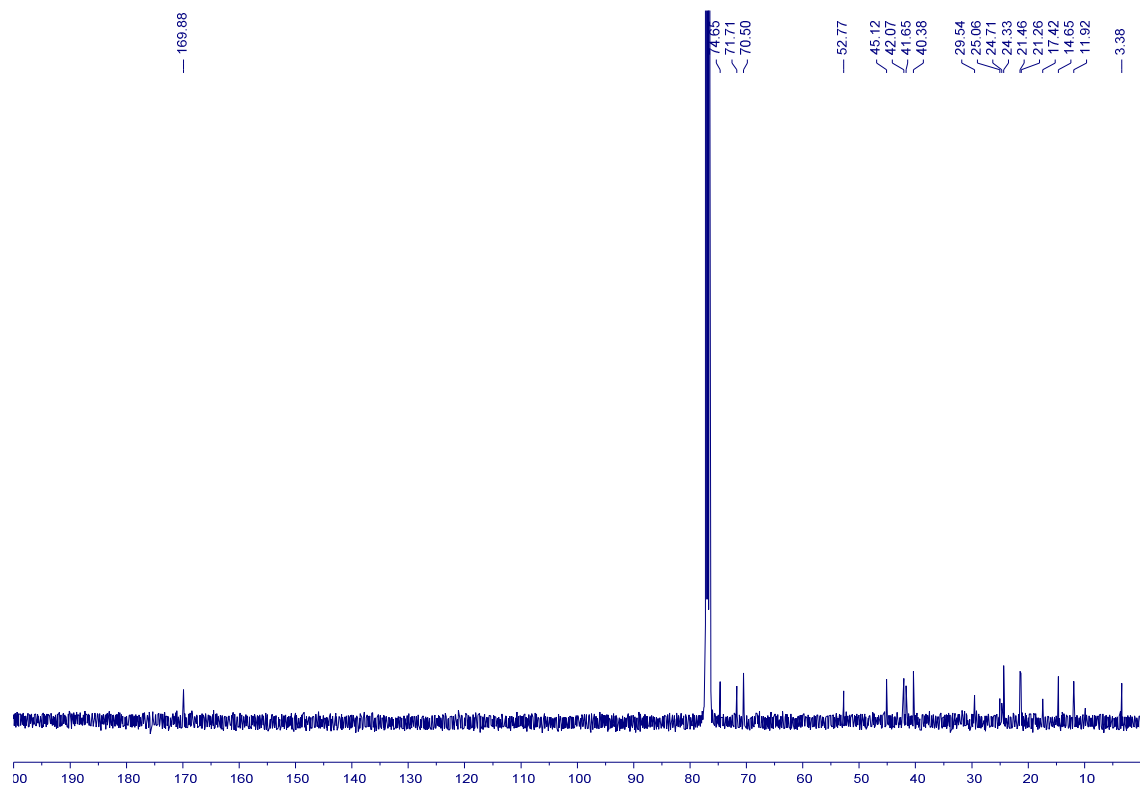

**5b**  $^1\text{H}$  NMR (400 MHz,  $\text{CDCl}_3$ ) inseparable 1:1 mixture with **S2**

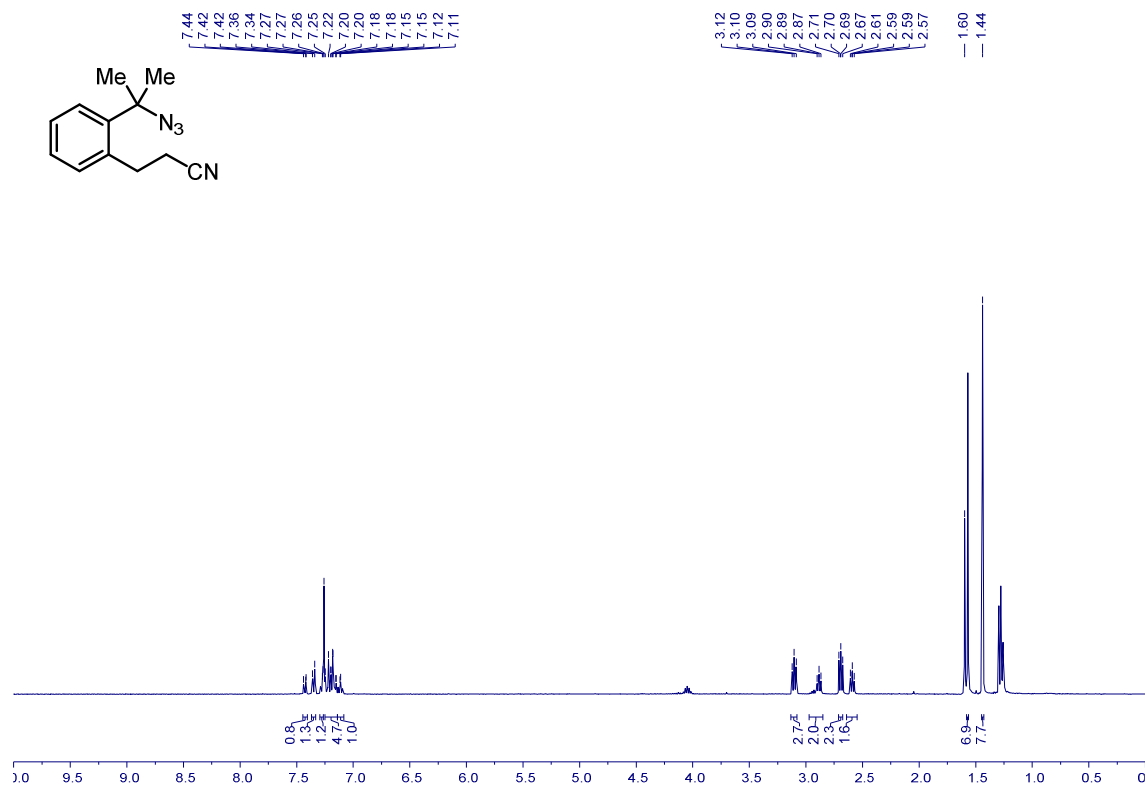

**5b**  $^{13}\text{C}$  NMR (101 MHz,  $\text{CDCl}_3$ ) inseparable 1:1 mixture with **S2**

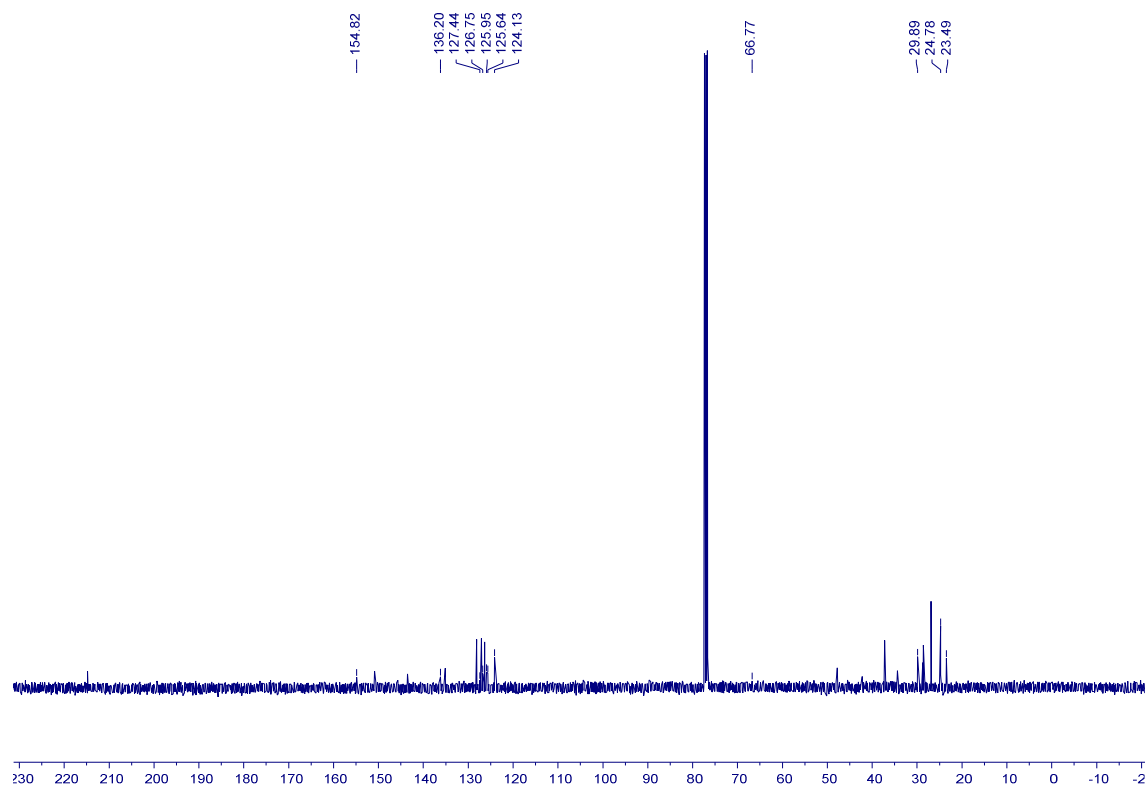

**5c**  $^1\text{H}$  NMR (400 MHz,  $\text{CDCl}_3$ )

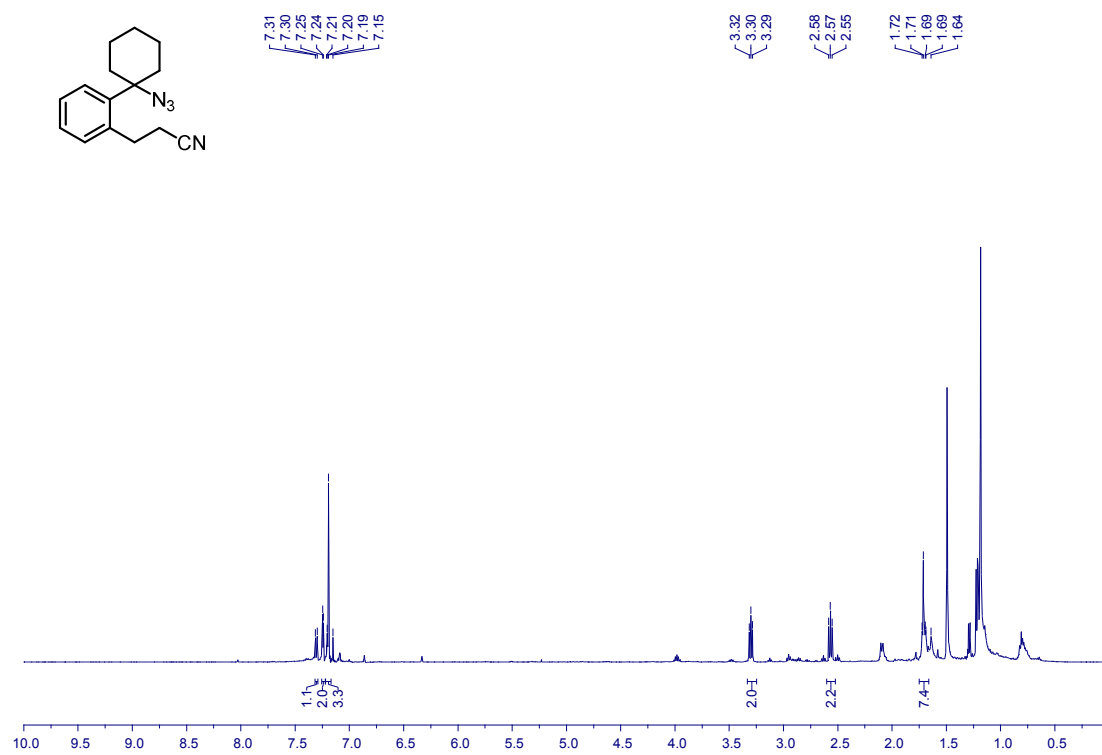

**5c**  $^{13}\text{C}$  NMR (101 MHz,  $\text{CDCl}_3$ )

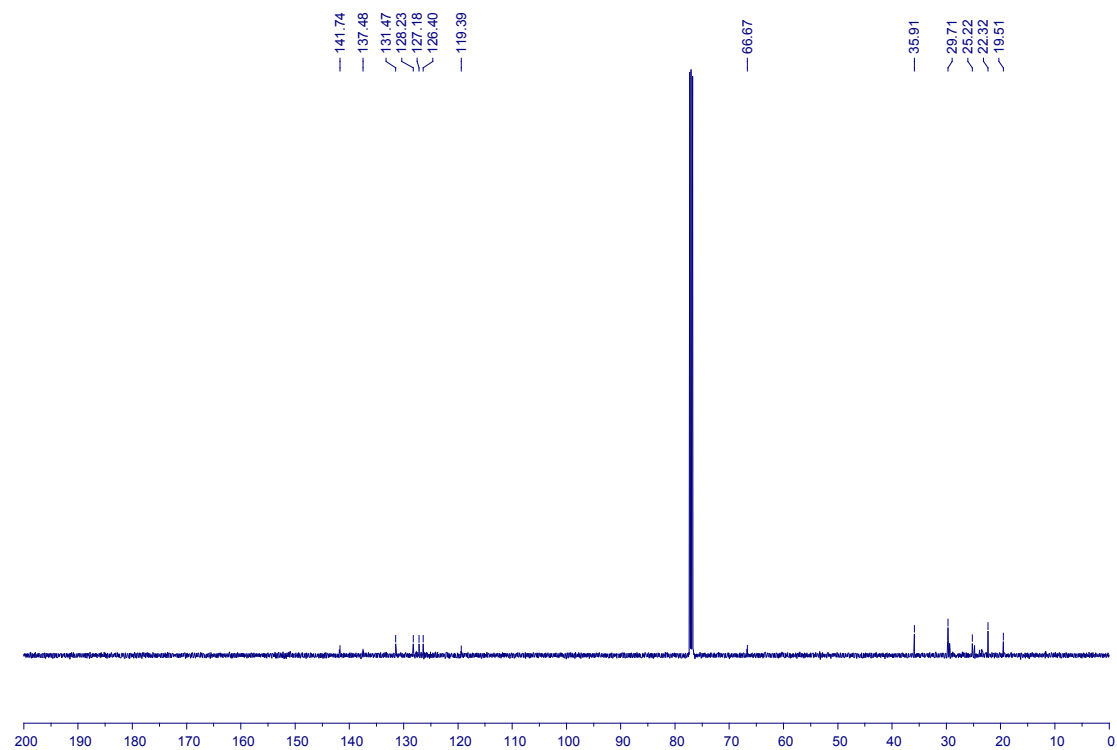

**5d**  $^1\text{H}$  NMR (400 MHz,  $\text{CDCl}_3$ )

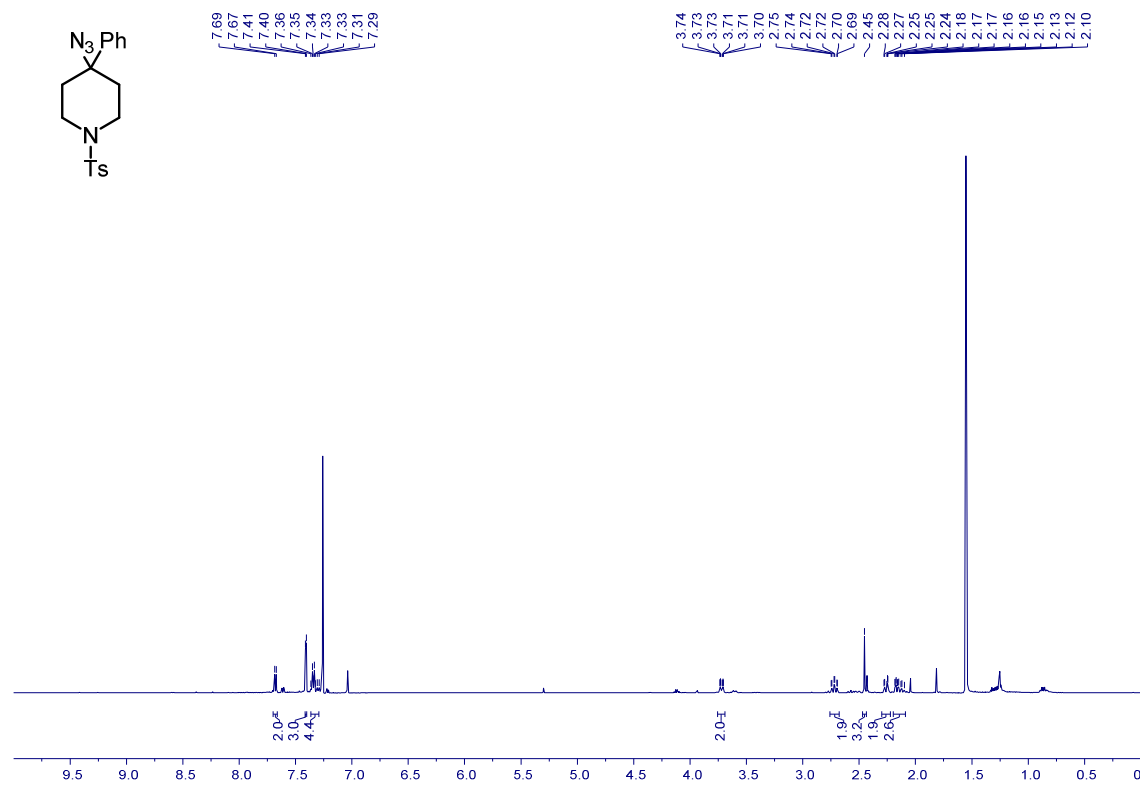

**5d**  $^{13}\text{C}$  NMR (101 MHz,  $\text{CDCl}_3$ )

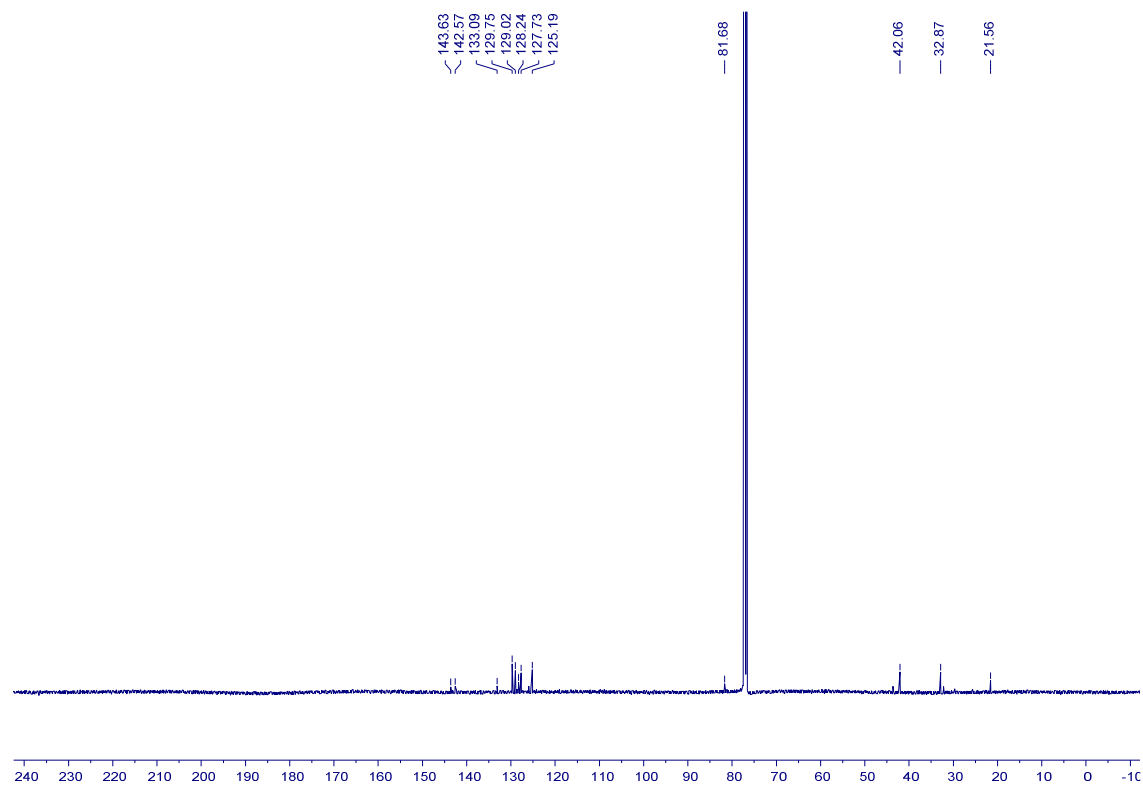



**7a**  $^1\text{H}$  NMR (400 MHz,  $\text{CDCl}_3$ )

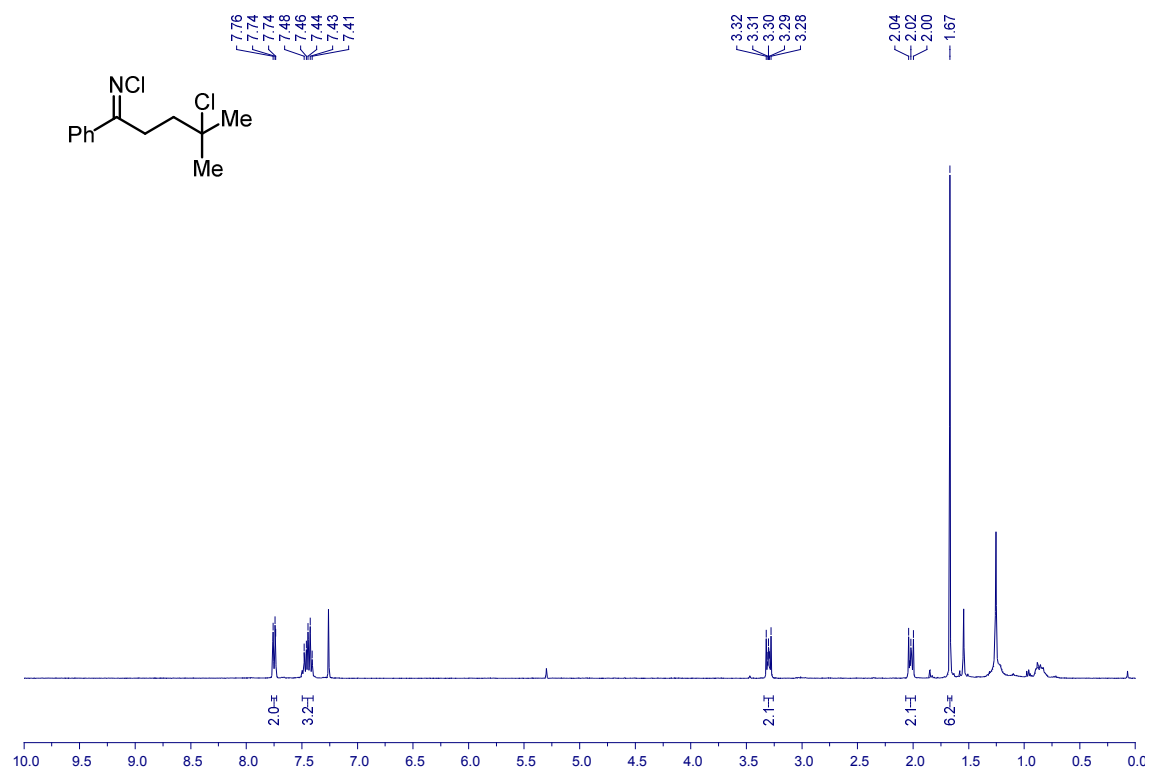

**7a**  $^{13}\text{C}$  NMR (101 MHz,  $\text{CDCl}_3$ )

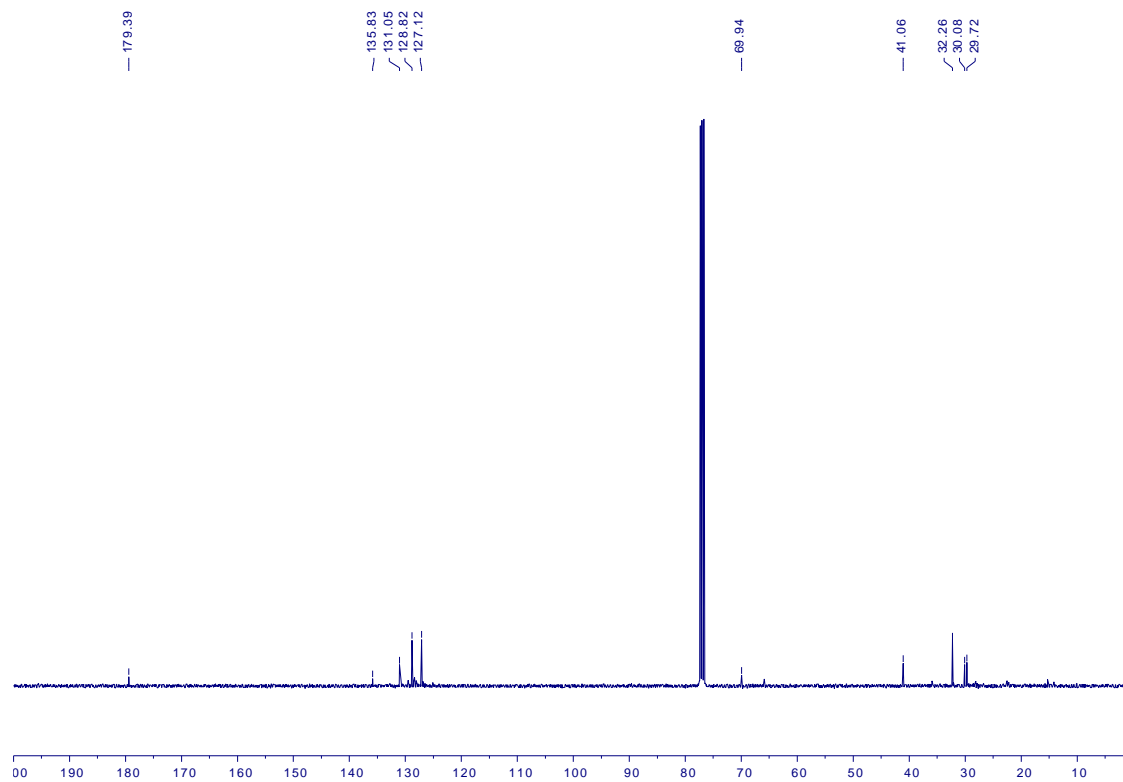

**7b**  $^1\text{H}$  NMR (400 MHz,  $\text{CDCl}_3$ )

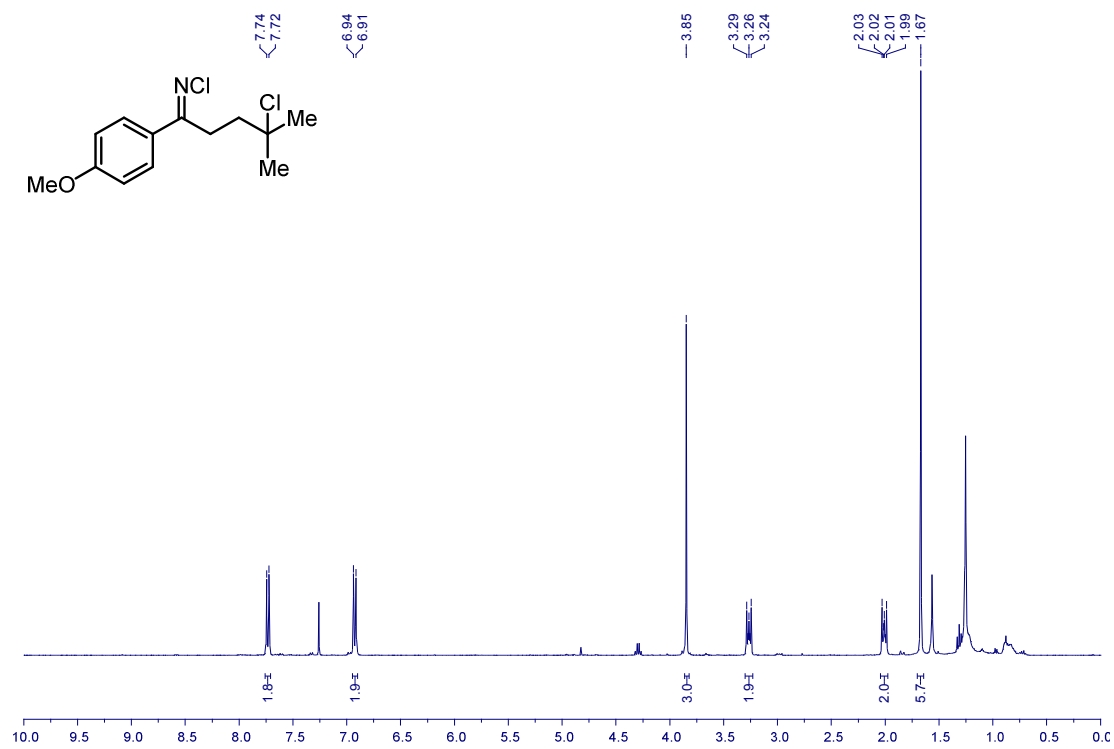

**7b**  $^{13}\text{C}$  NMR (101 MHz,  $\text{CDCl}_3$ )

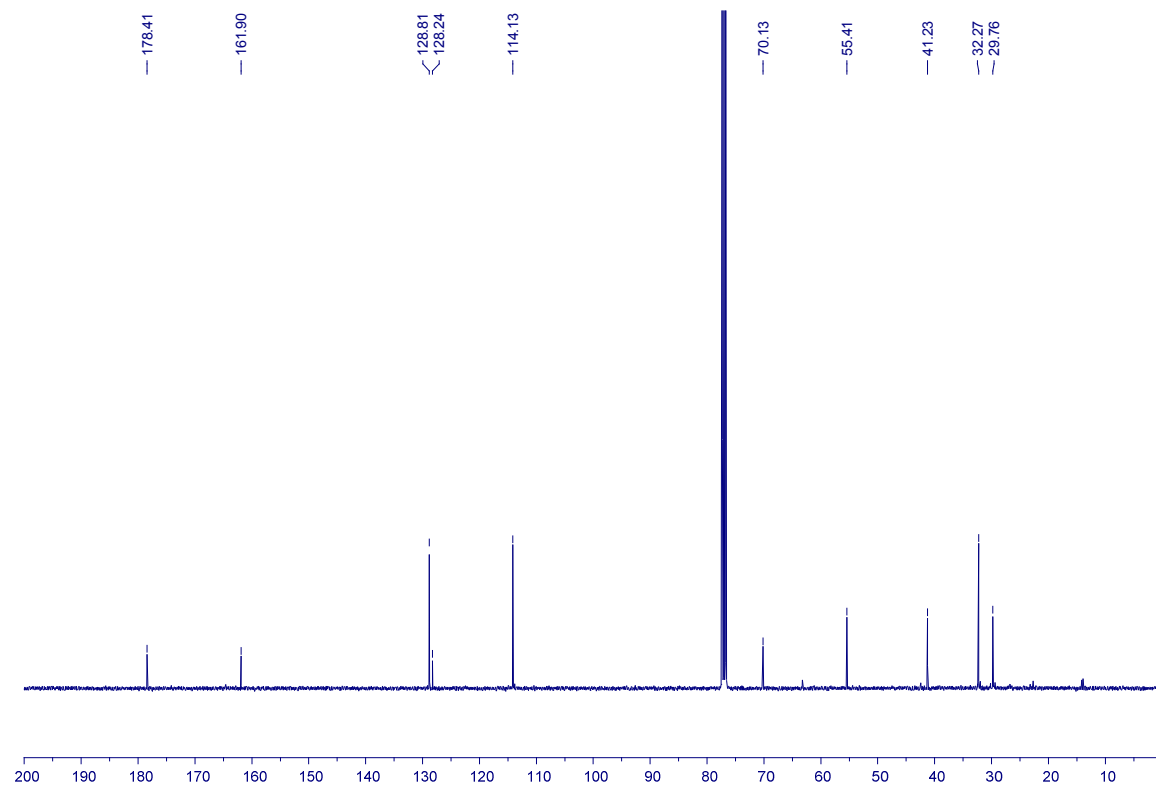



7c  $^1\text{H}$  NMR (500 MHz,  $\text{CDCl}_3$ )

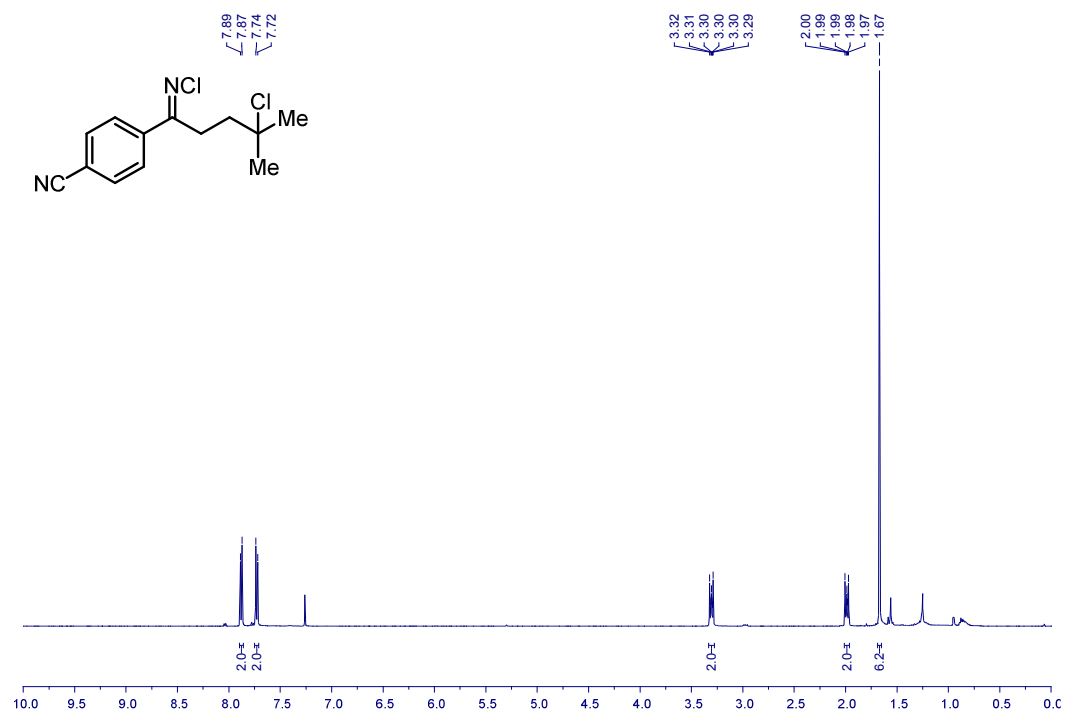

7c  $^{13}\text{C}$  NMR (126 MHz,  $\text{CDCl}_3$ )

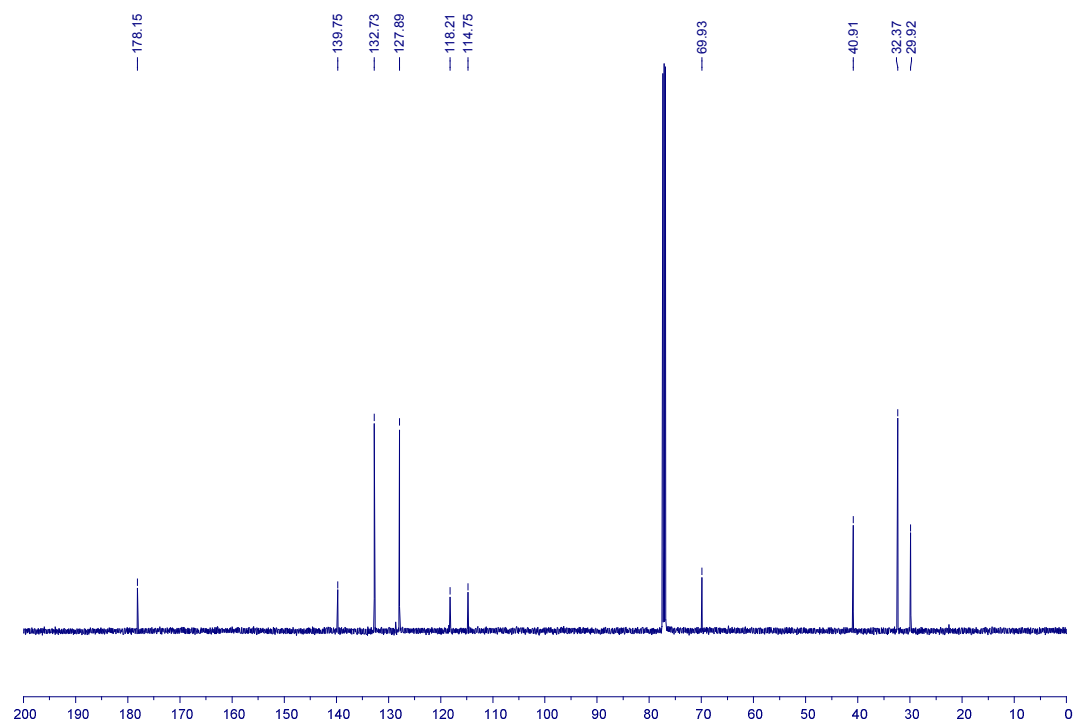

**7d**  $^1\text{H}$  NMR (500 MHz,  $\text{CDCl}_3$ )

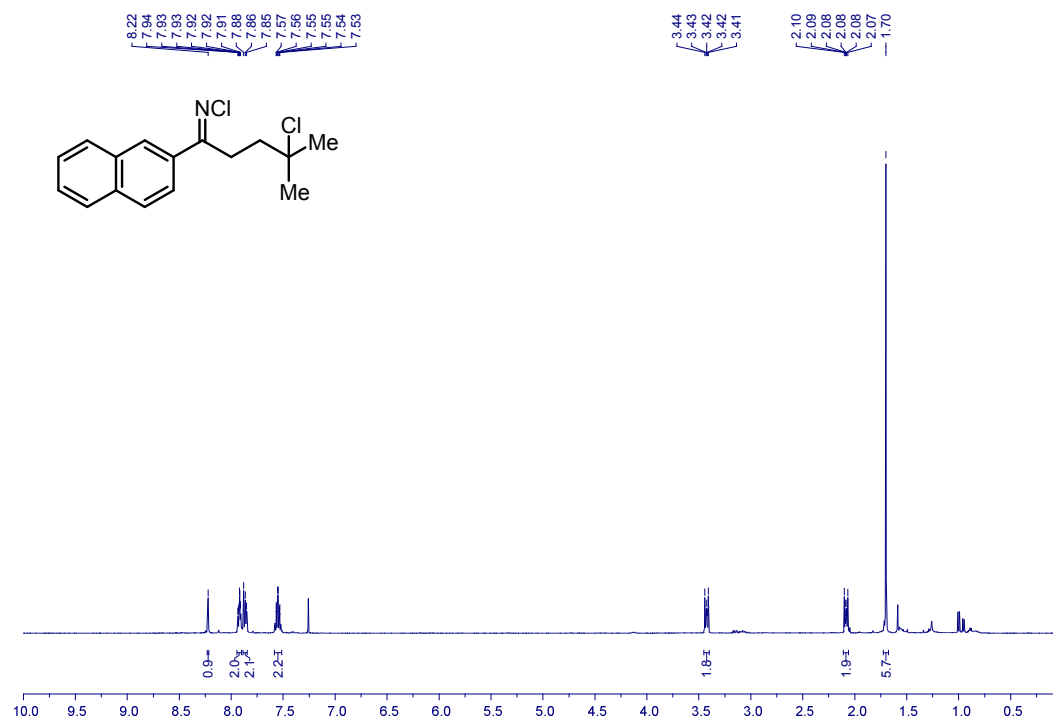

**7d**  $^{13}\text{C}$  NMR (126 MHz,  $\text{CDCl}_3$ )

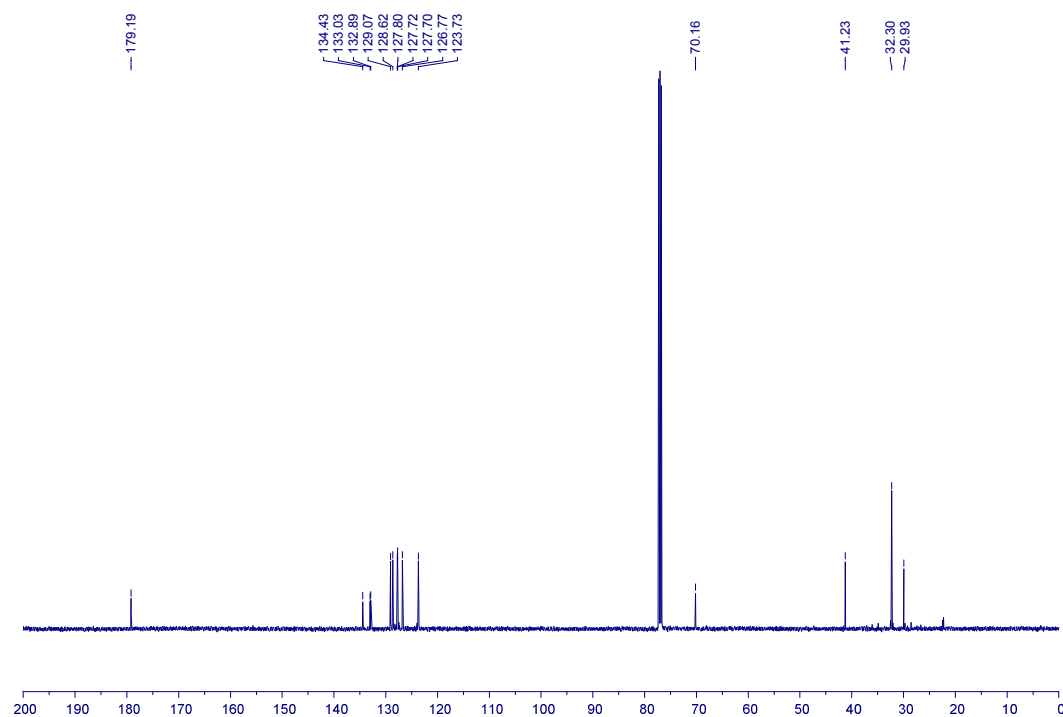

**7e**  $^1\text{H}$  NMR (500 MHz,  $\text{CDCl}_3$ )

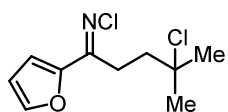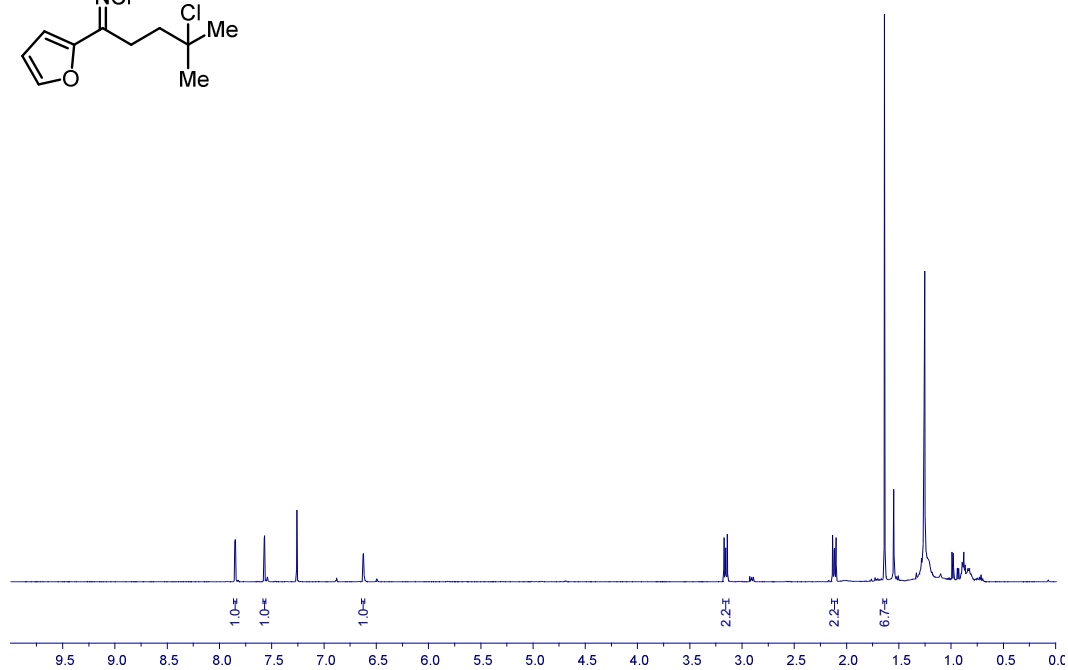

**7e**  $^{13}\text{C}$  NMR (126 MHz,  $\text{CDCl}_3$ )

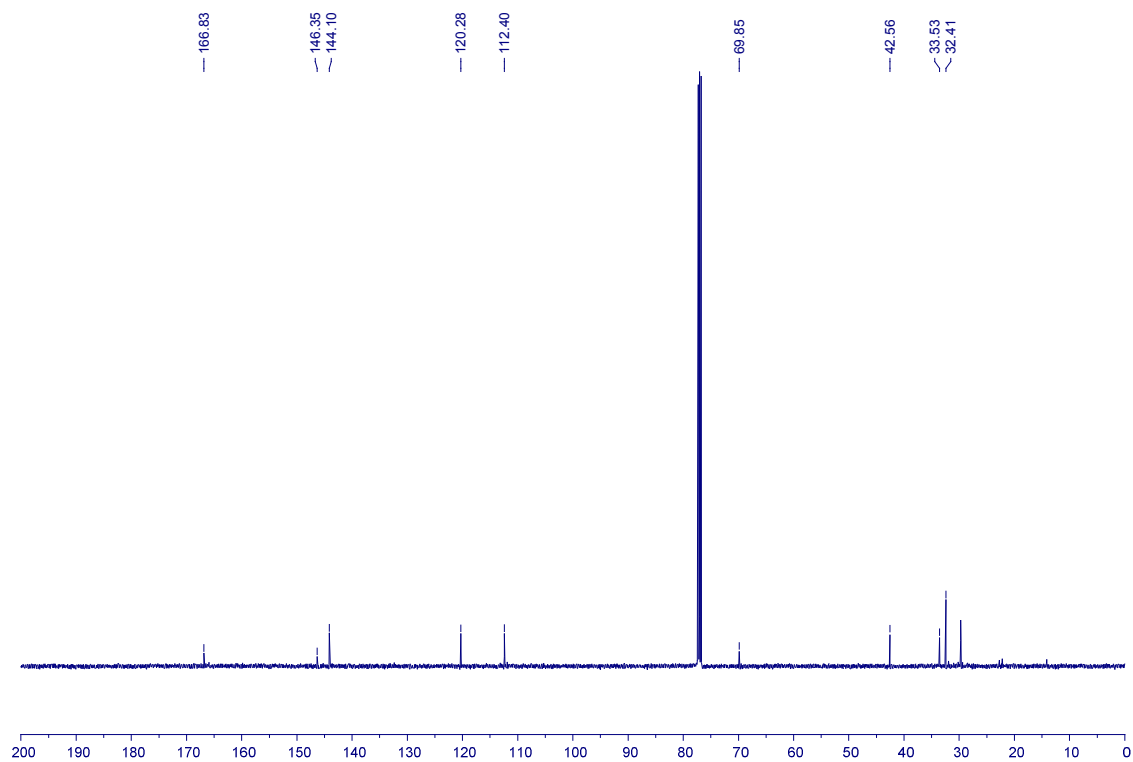

**7f**  $^1\text{H}$  NMR (500 MHz,  $\text{CDCl}_3$ )

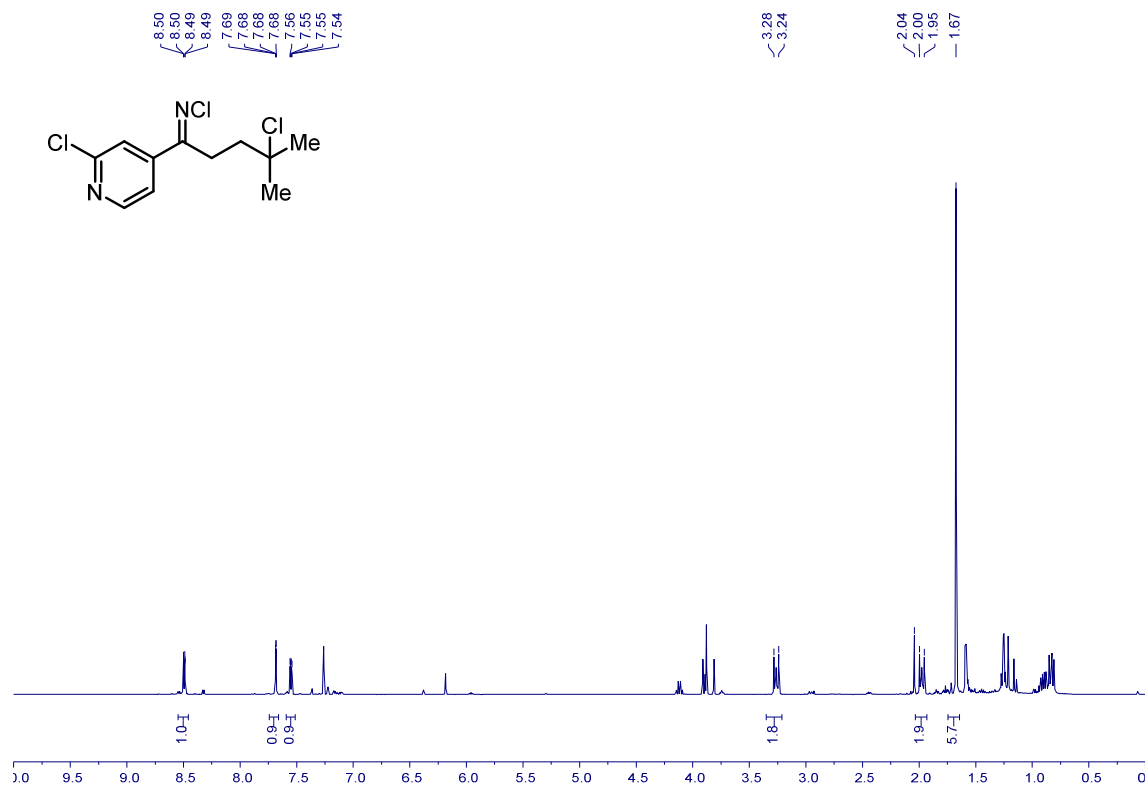

**7f**  $^{13}\text{C}$  NMR (126 MHz,  $\text{CDCl}_3$ )

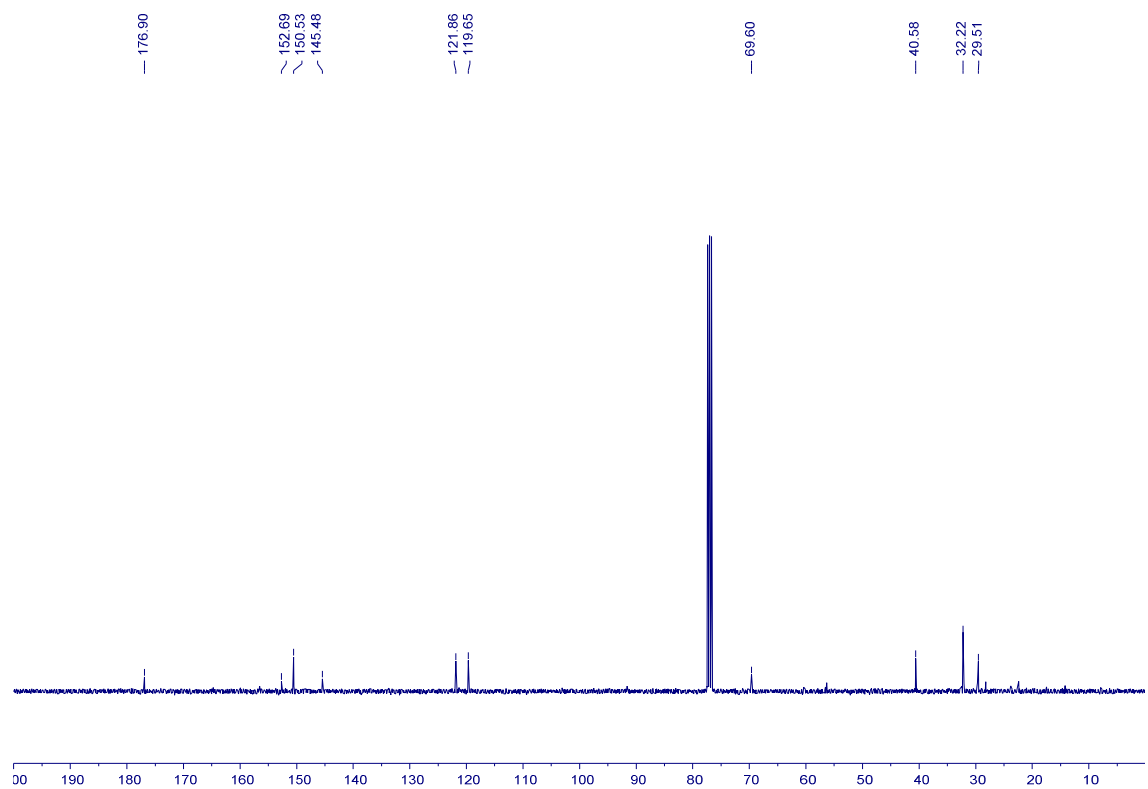

7g  $^1\text{H}$  NMR (500 MHz,  $\text{CDCl}_3$ )

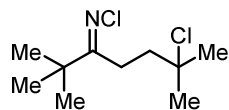

2.74  
2.73  
2.72  
2.72  
2.71  
1.99  
1.98  
1.98  
1.96  
-1.16

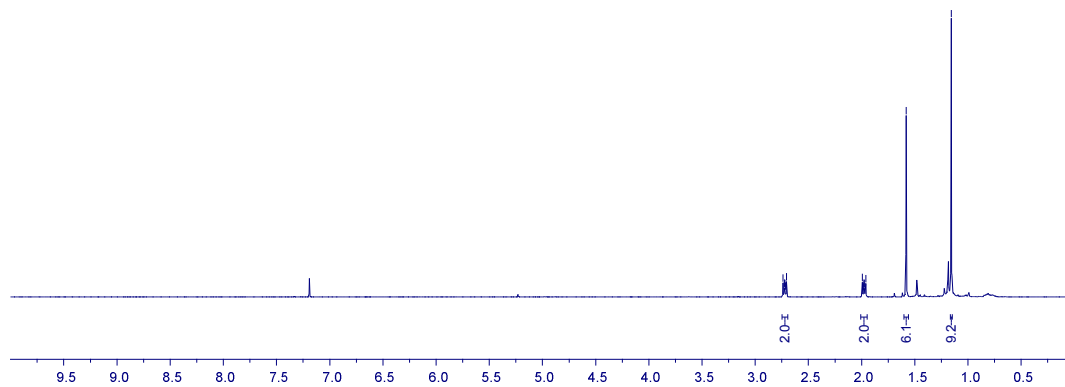

7g  $^{13}\text{C}$  NMR (126 MHz,  $\text{CDCl}_3$ )

186.90

70.88

43.79

40.83

32.60

29.32

28.23

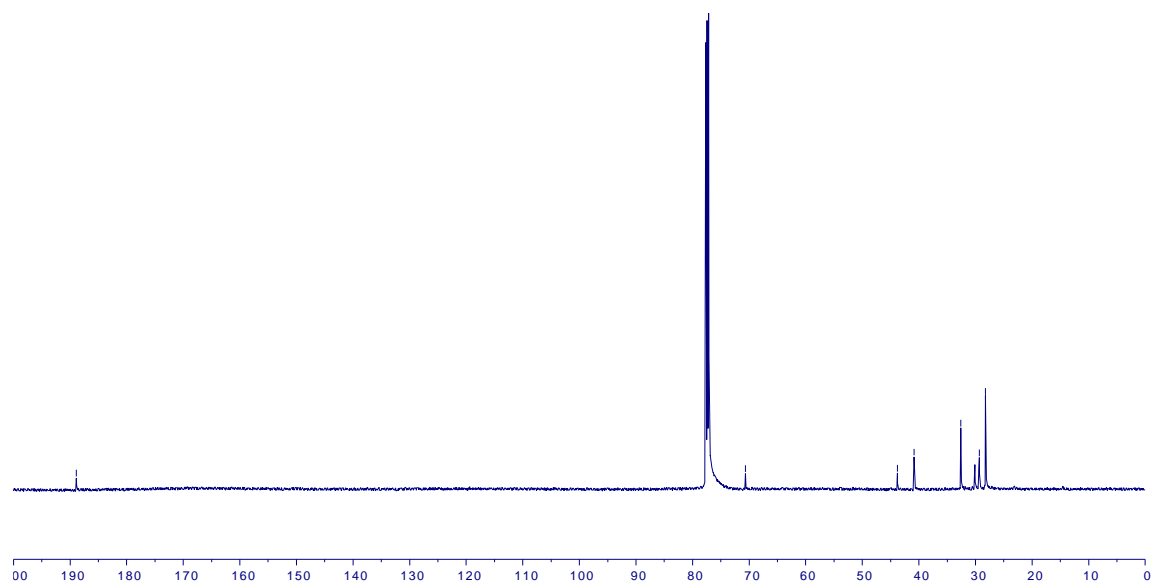



**7i**  $^1\text{H}$  NMR (400 MHz,  $\text{CDCl}_3$ )

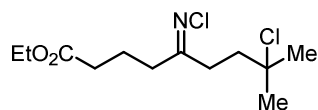

4.18  
4.17  
4.17  
4.15  
4.15  
4.15  
4.14  
4.14  
4.13  
4.13  
4.12  
2.71  
2.69  
2.67  
2.65  
2.64  
2.63  
2.62  
2.48  
2.42  
2.41  
2.39  
2.38  
2.33  
2.06  
2.04  
2.03  
1.95  
1.93  
1.92  
1.90  
1.89  
1.55  
1.53

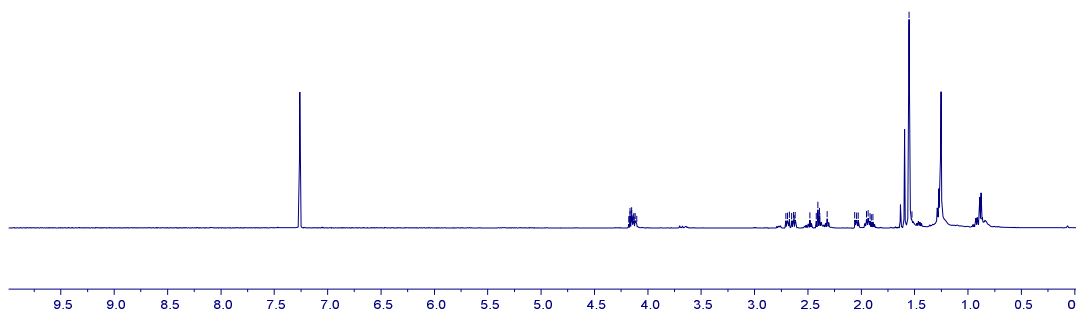

**7i**  $^{13}\text{C}$  NMR (126 MHz,  $\text{CDCl}_3$ )

182.65  
172.59  
68.75  
60.62  
41.13  
35.01  
33.68  
32.44  
22.34  
20.68  
14.25

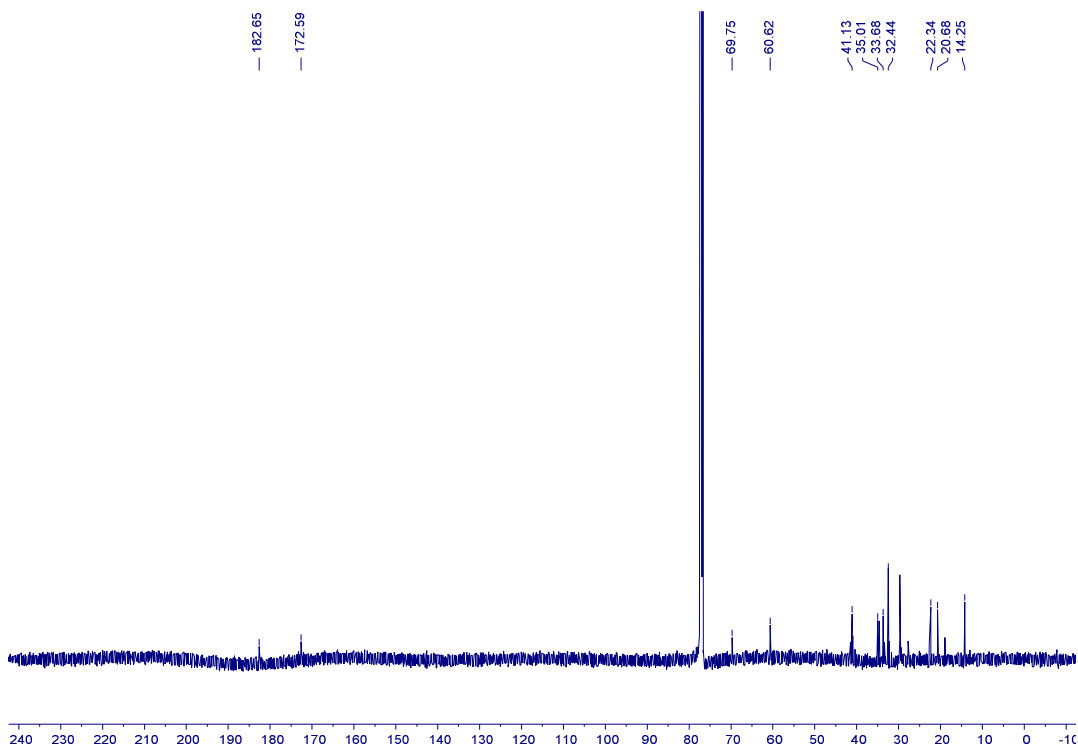

7j  $^1\text{H}$  NMR (500 MHz,  $\text{CDCl}_3$ )

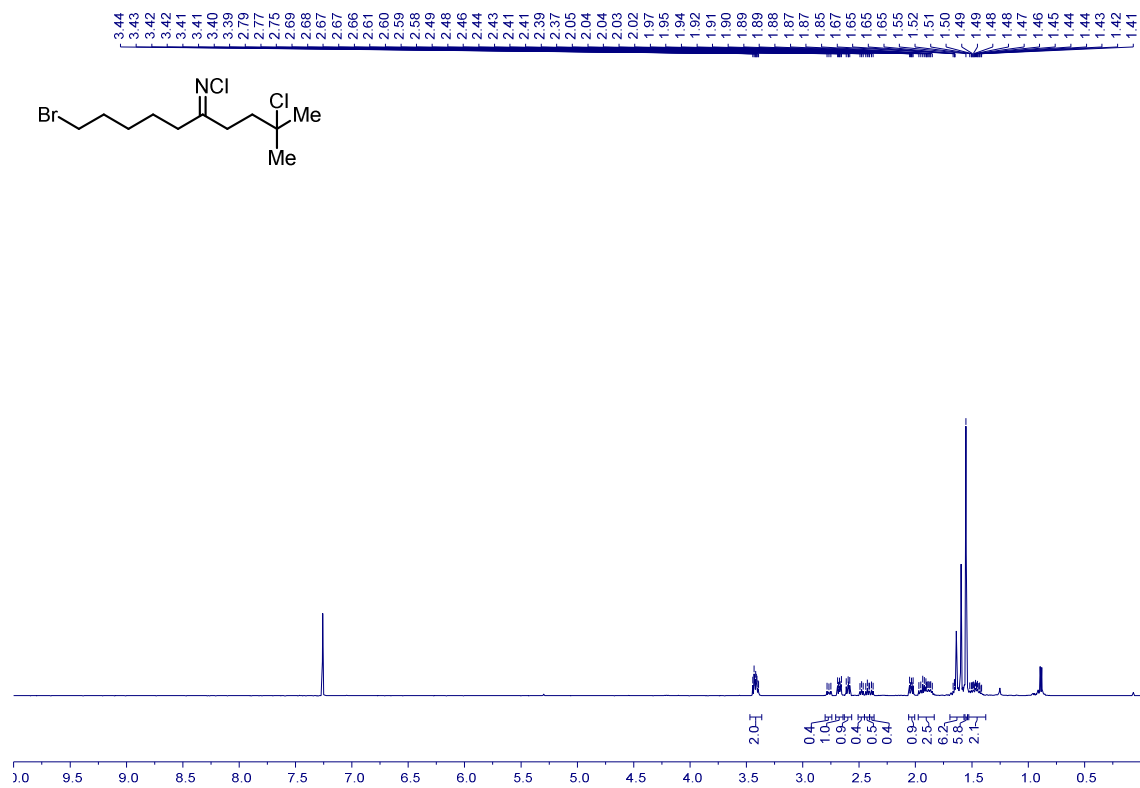

7j  $^{13}\text{C}$  NMR (126 MHz,  $\text{CDCl}_3$ )

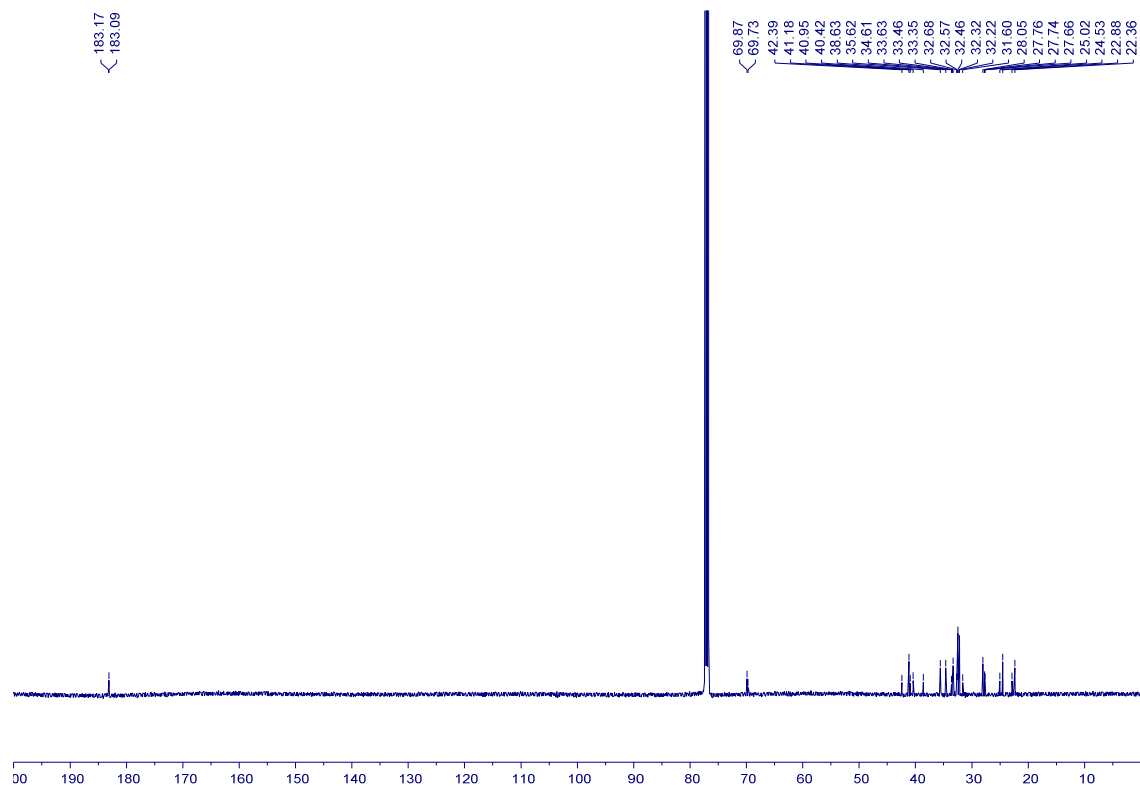



7k <sup>1</sup>H NMR (500 MHz, CDCl<sub>3</sub>)

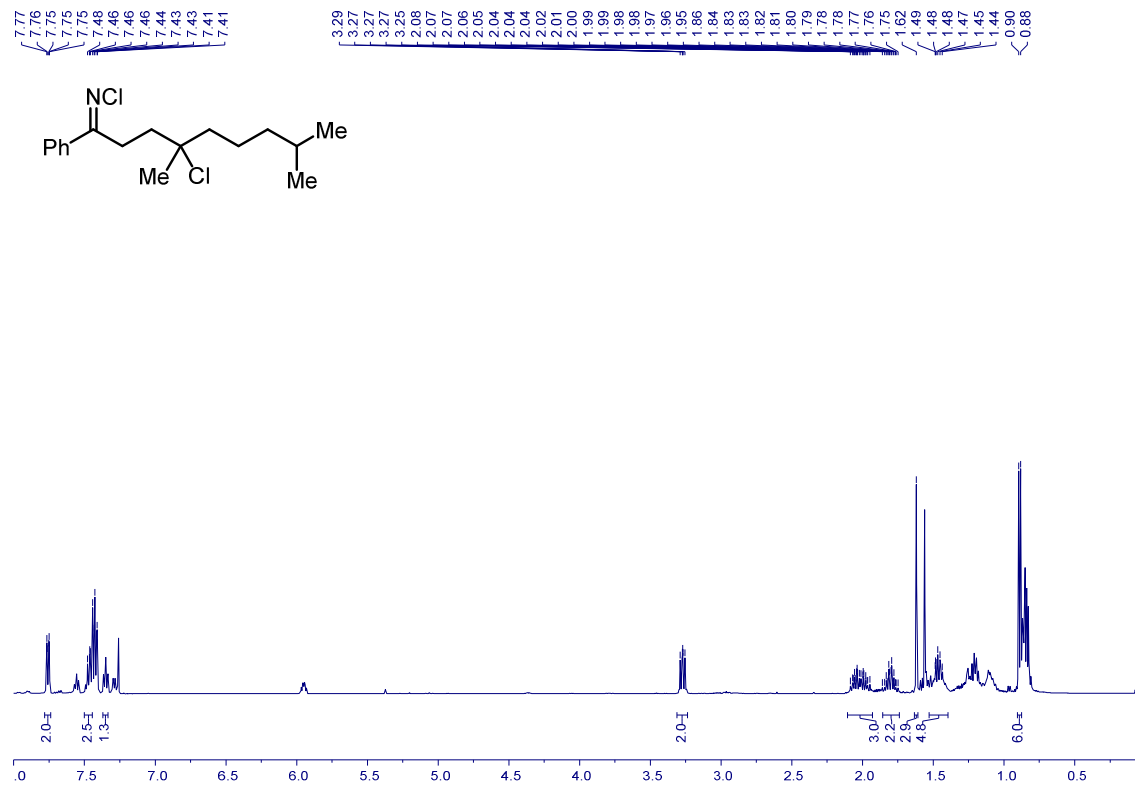

7k <sup>13</sup>C NMR (126 MHz, CDCl<sub>3</sub>)

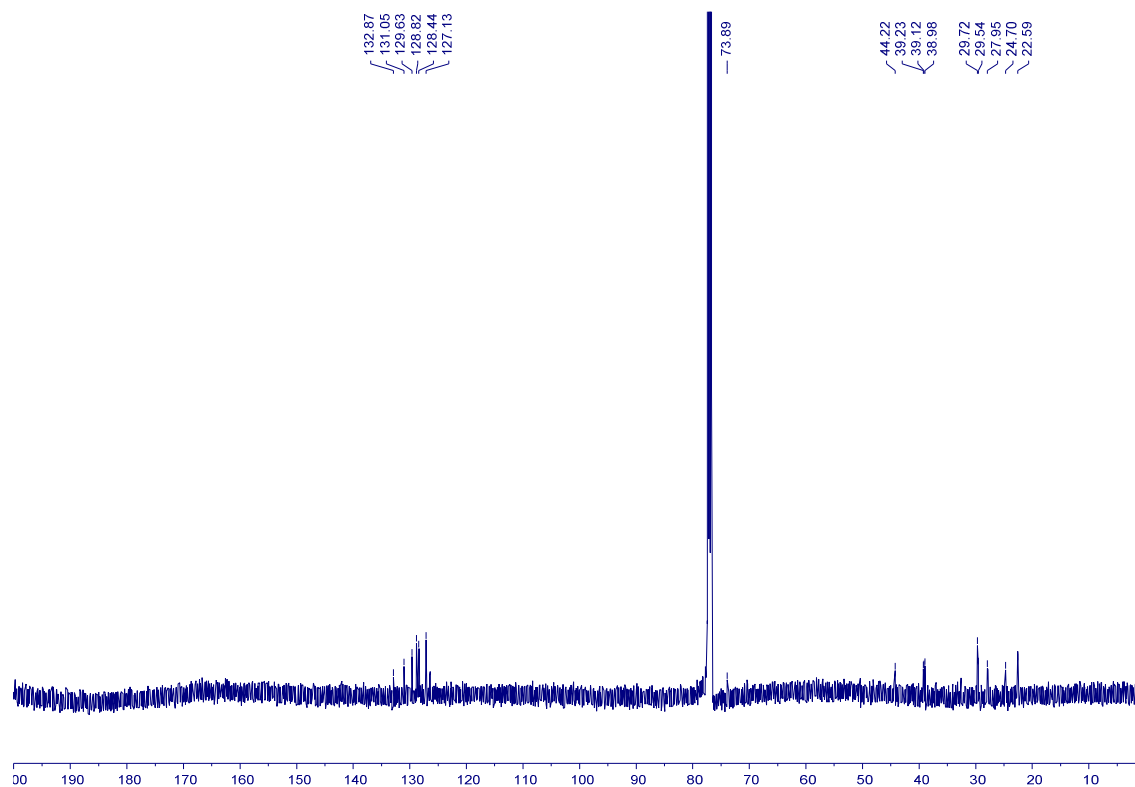

**8b**  $^1\text{H}$  NMR (400 MHz,  $\text{CDCl}_3$ )

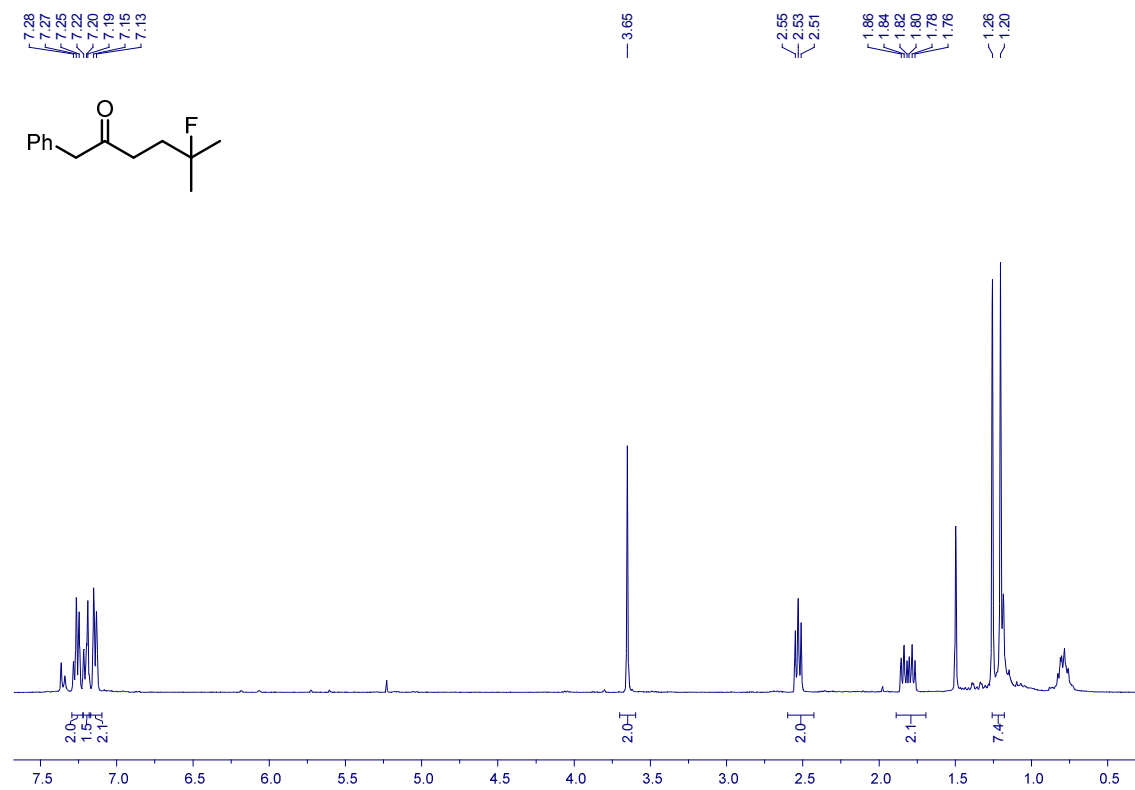

**8b**  $^{13}\text{C}$  NMR (101 MHz,  $\text{CDCl}_3$ )

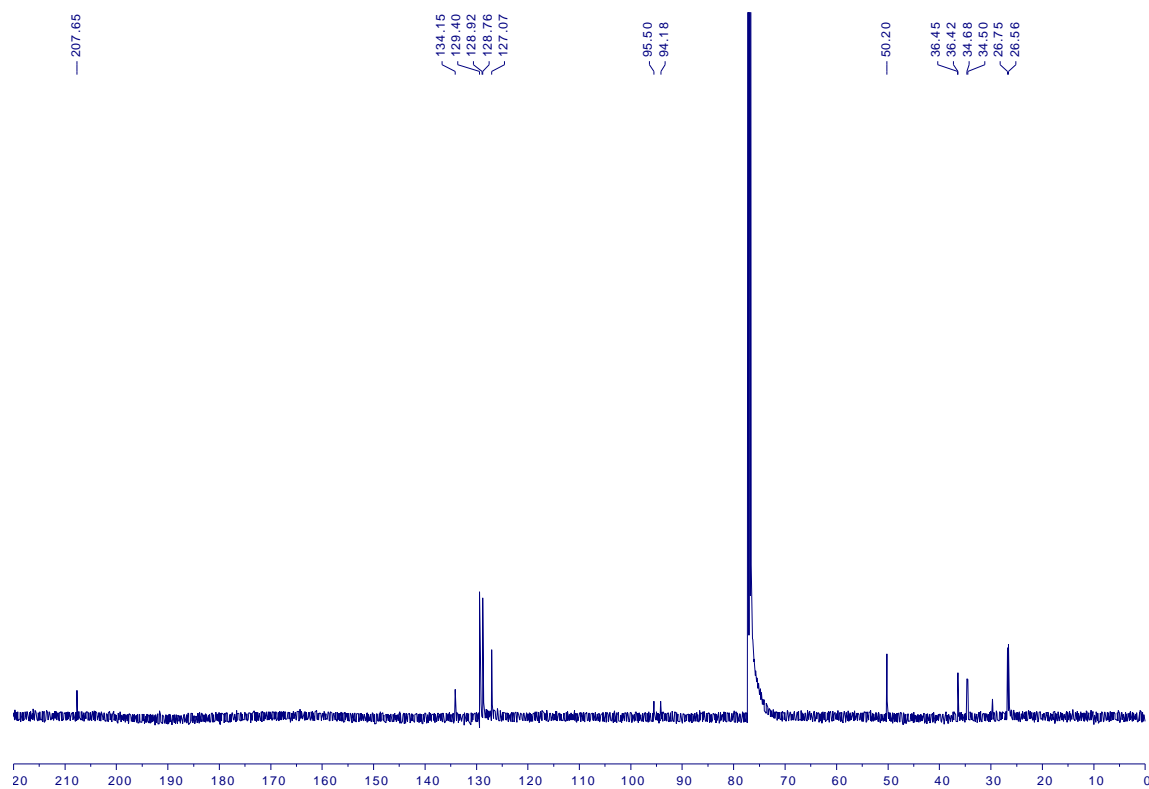

**8b**  $^{19}\text{F}$  NMR (376 MHz,  $\text{CDCl}_3$ )

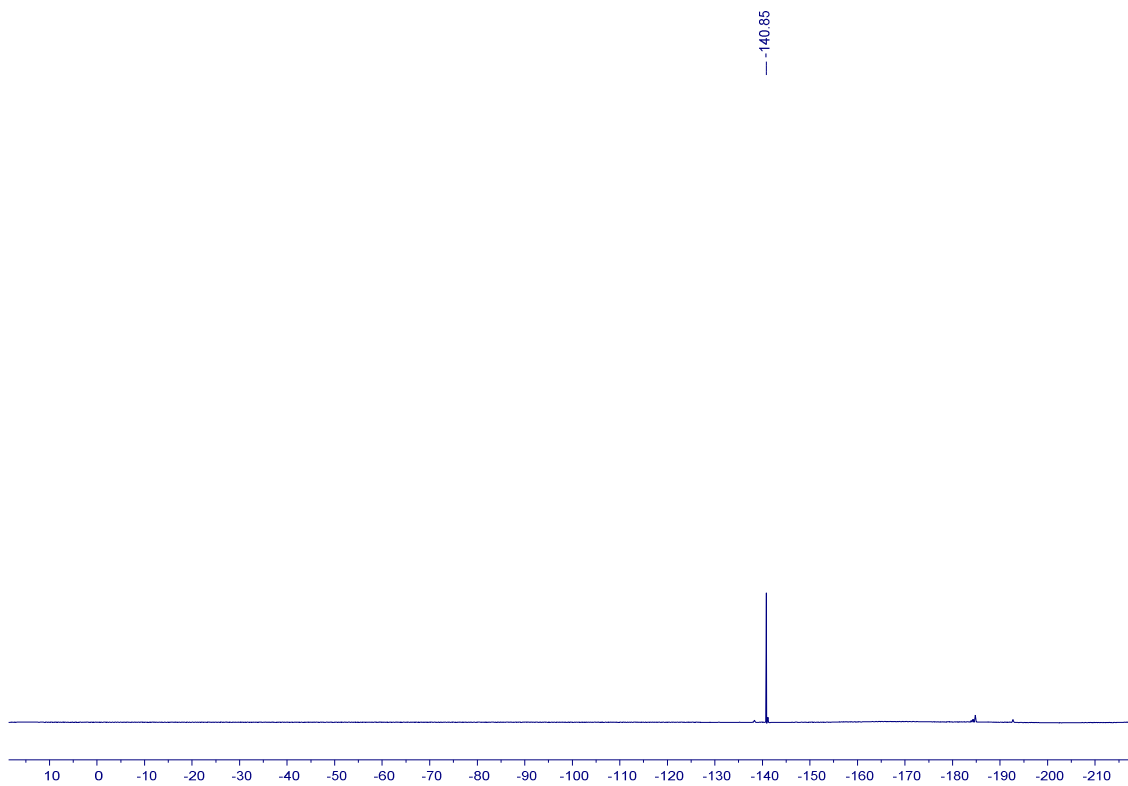

**8c**  $^1\text{H}$  NMR (500 MHz,  $\text{CDCl}_3$ )

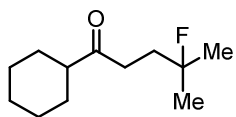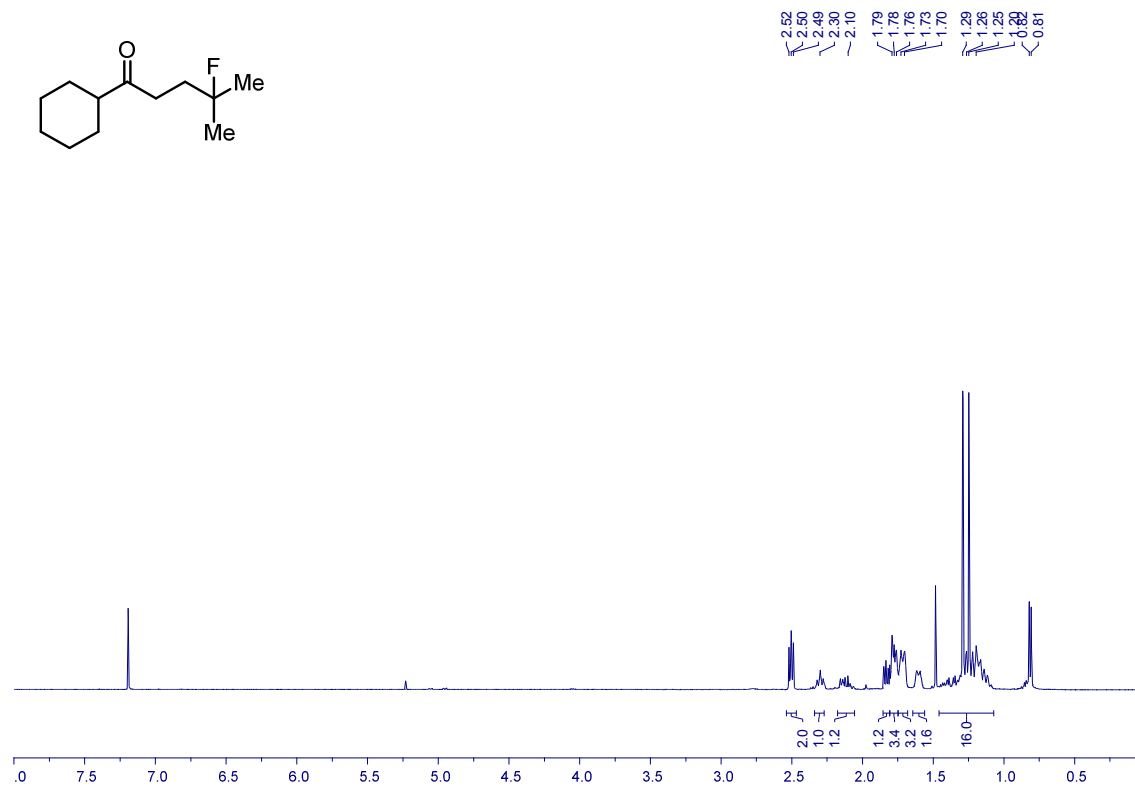

**8c**  $^{13}\text{C}$  NMR (126 MHz,  $\text{CDCl}_3$ )

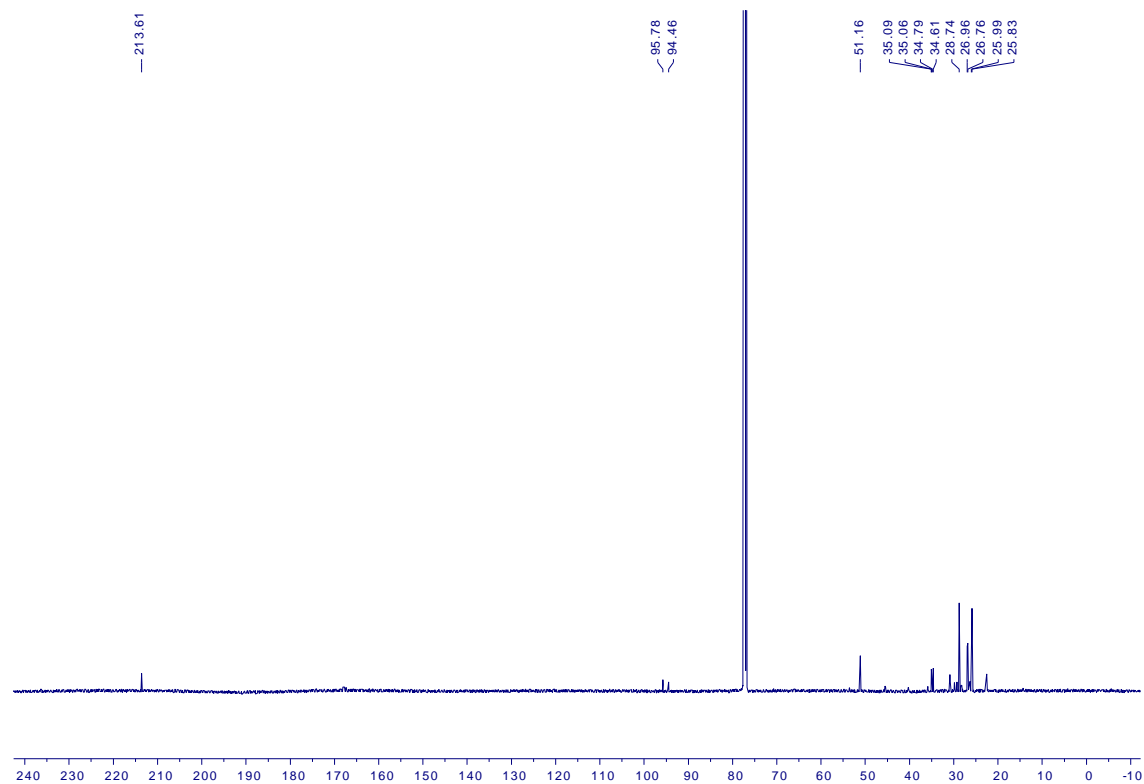

**8c**  $^{19}\text{F}$  NMR (376 MHz,  $\text{CDCl}_3$ )

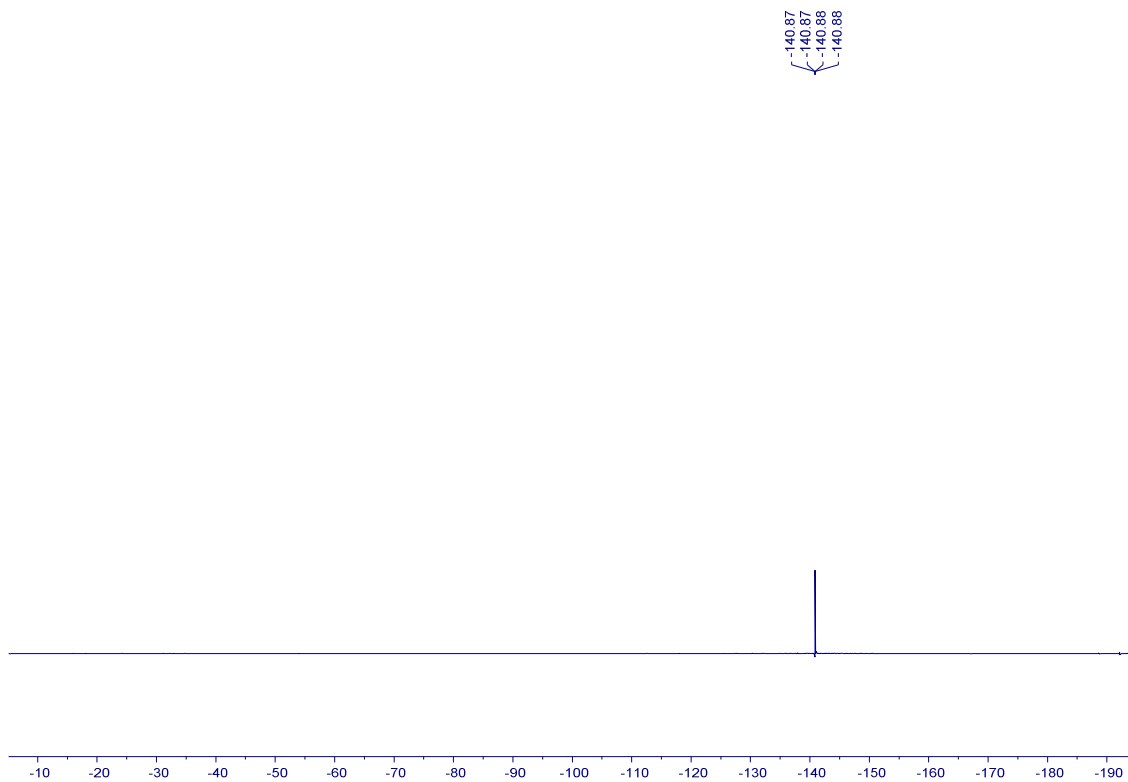

**8d**  $^1\text{H}$  NMR (500 MHz,  $\text{CDCl}_3$ )

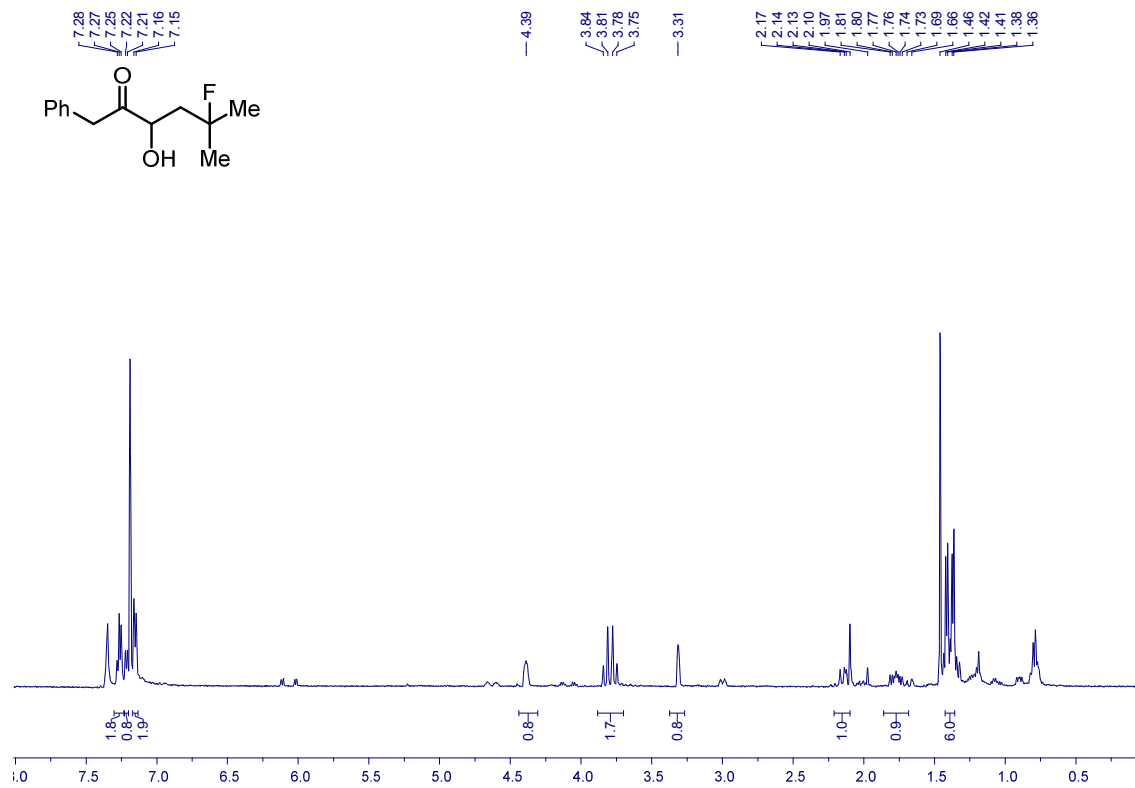

**8d**  $^{13}\text{C}$  NMR (126 MHz,  $\text{CDCl}_3$ )

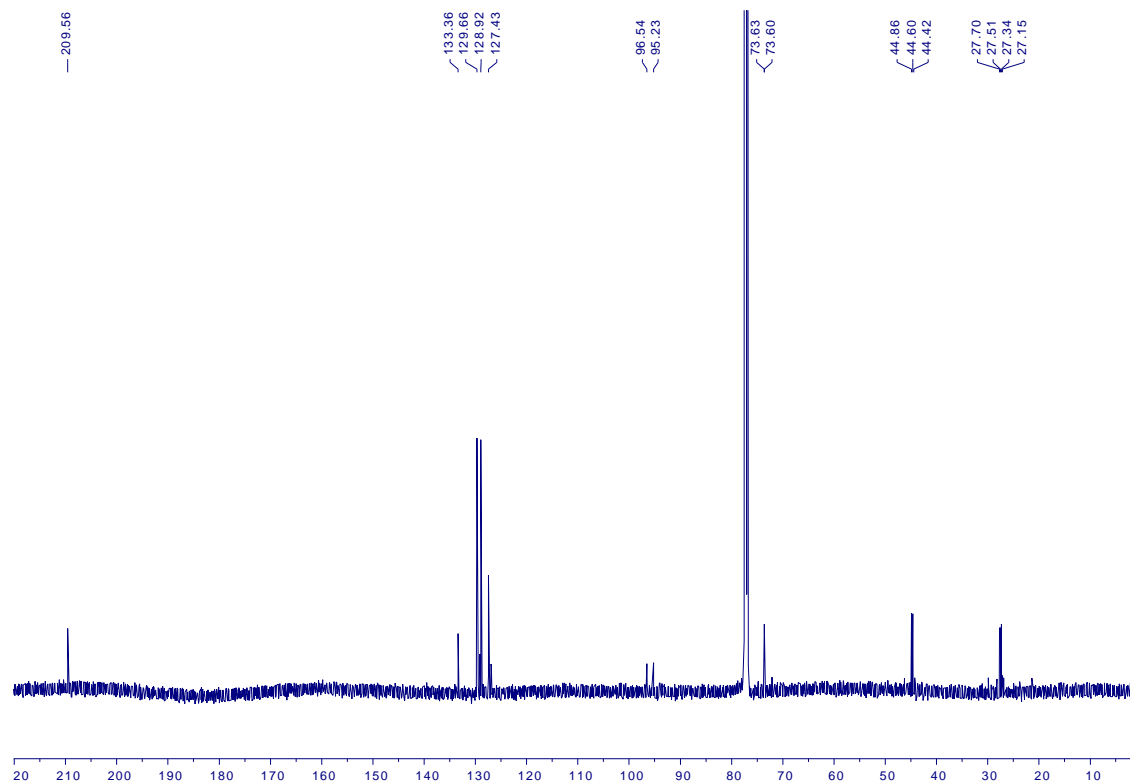

**8d**  $^{19}\text{F}$  NMR (376 MHz,  $\text{CDCl}_3$ )

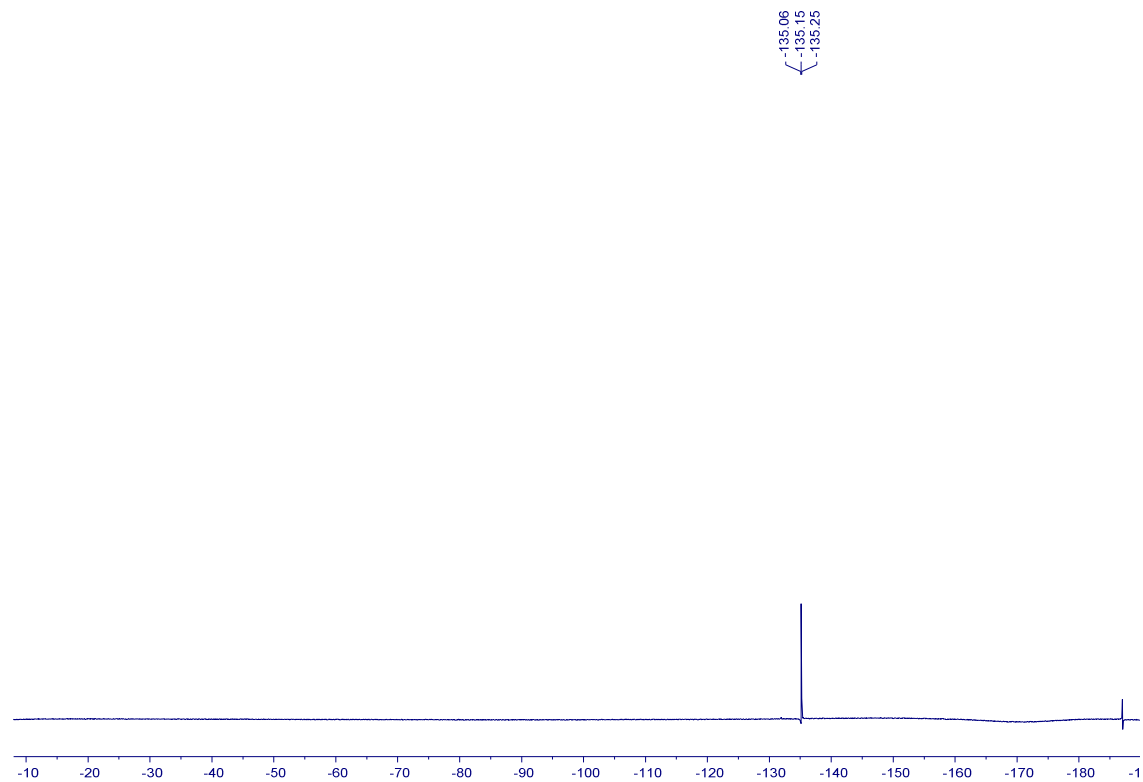

**8e**  $^1\text{H}$  NMR (400 MHz,  $\text{CDCl}_3$ )

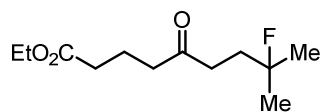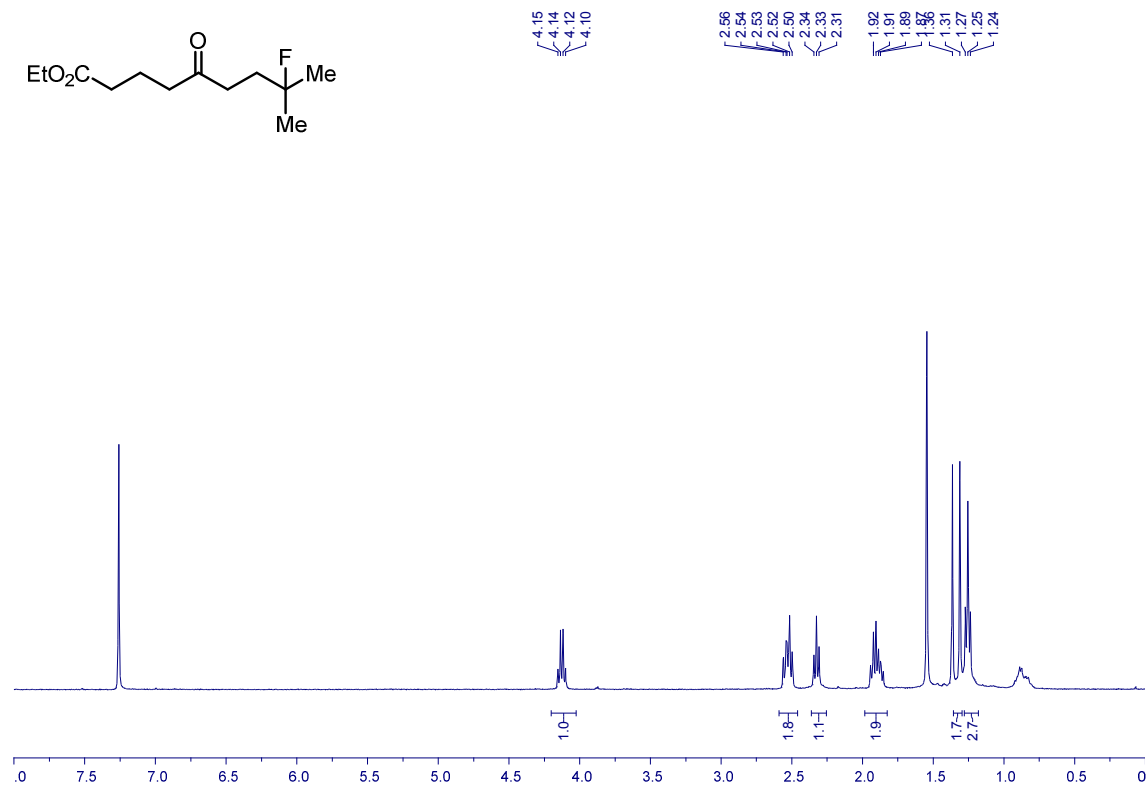

**8e**  $^{13}\text{C}$  NMR (126 MHz,  $\text{CDCl}_3$ )

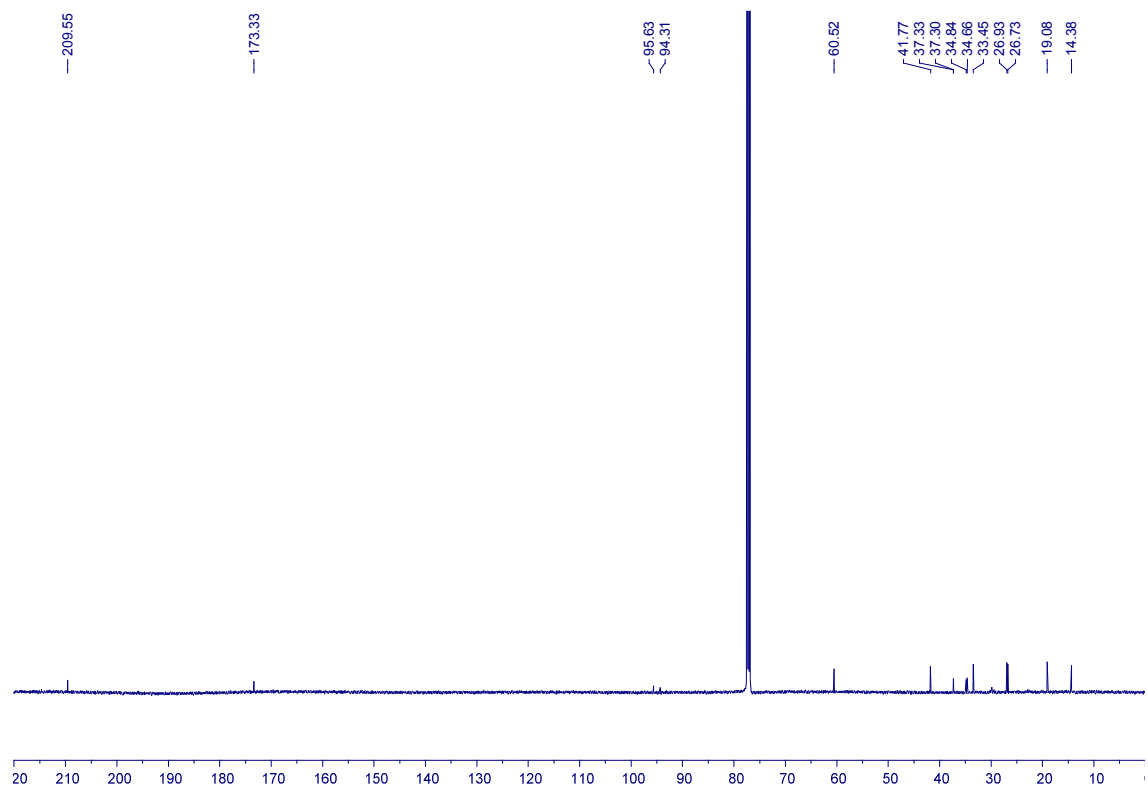



**8e**  $^{19}\text{F}$  NMR (376 MHz,  $\text{CDCl}_3$ )

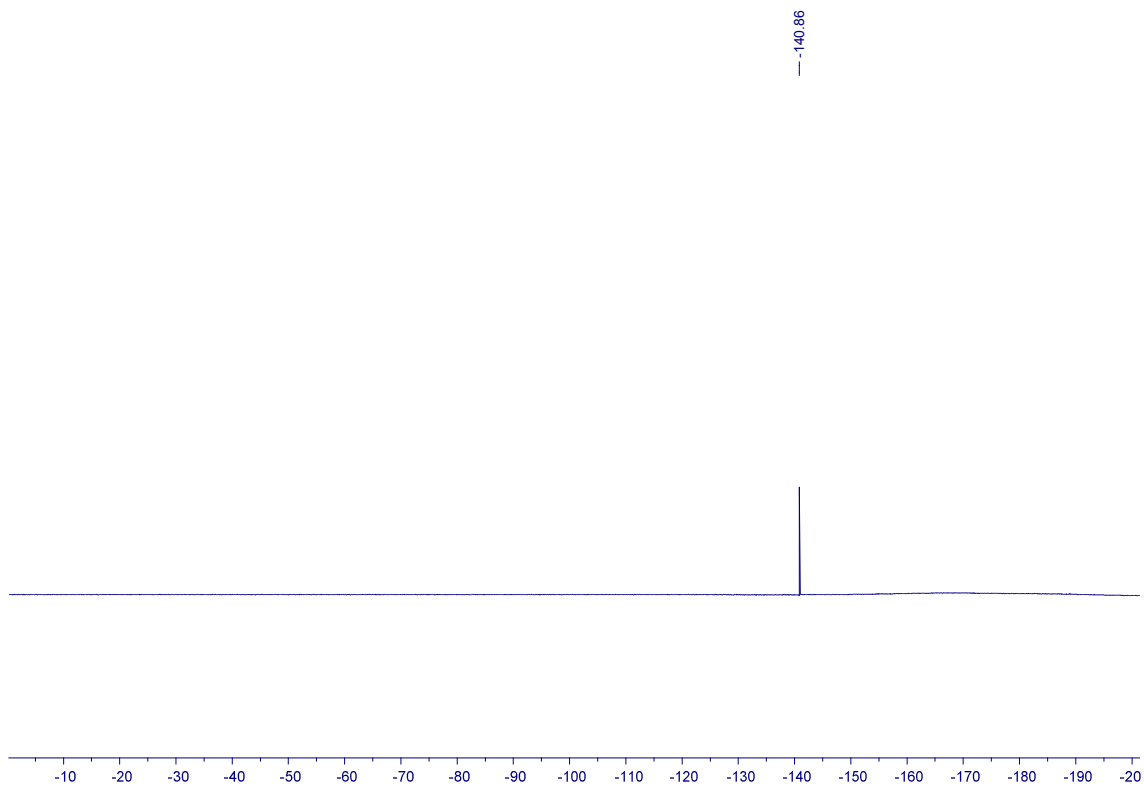

**8f**  $^1\text{H}$  NMR (500 MHz,  $\text{CDCl}_3$ )

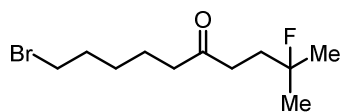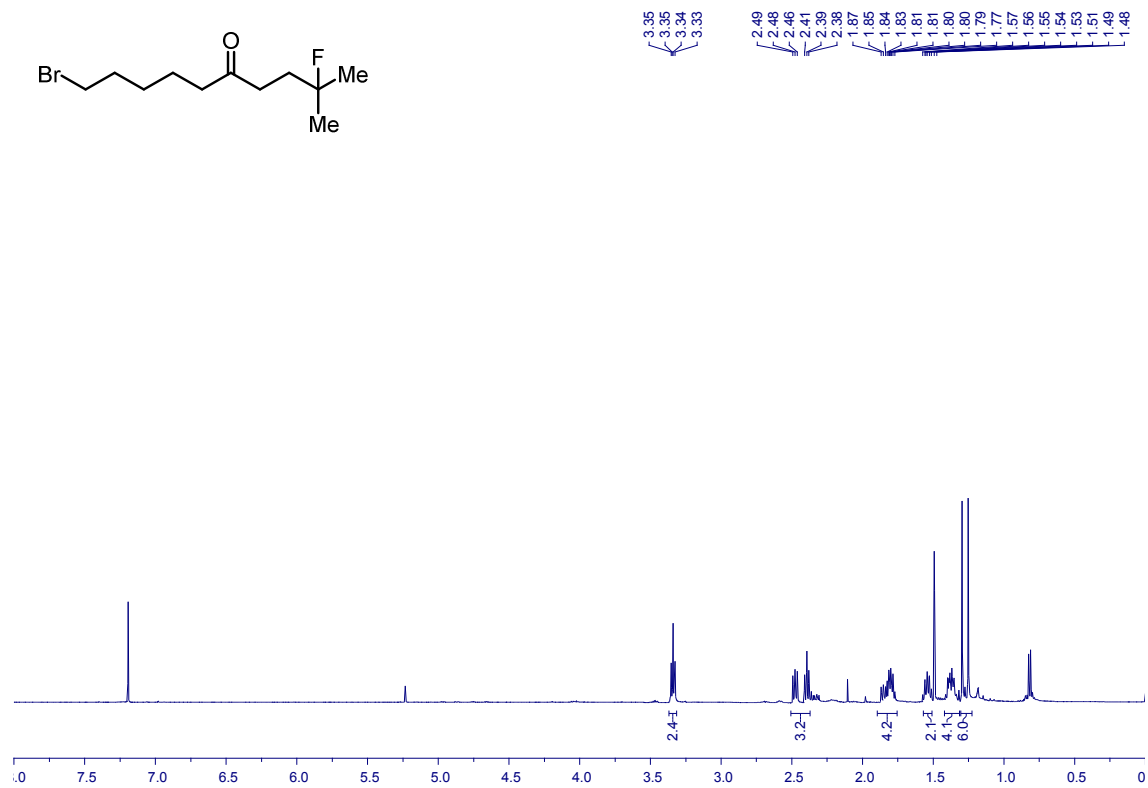

**8f**  $^{13}\text{C}$  NMR (126 MHz,  $\text{CDCl}_3$ )

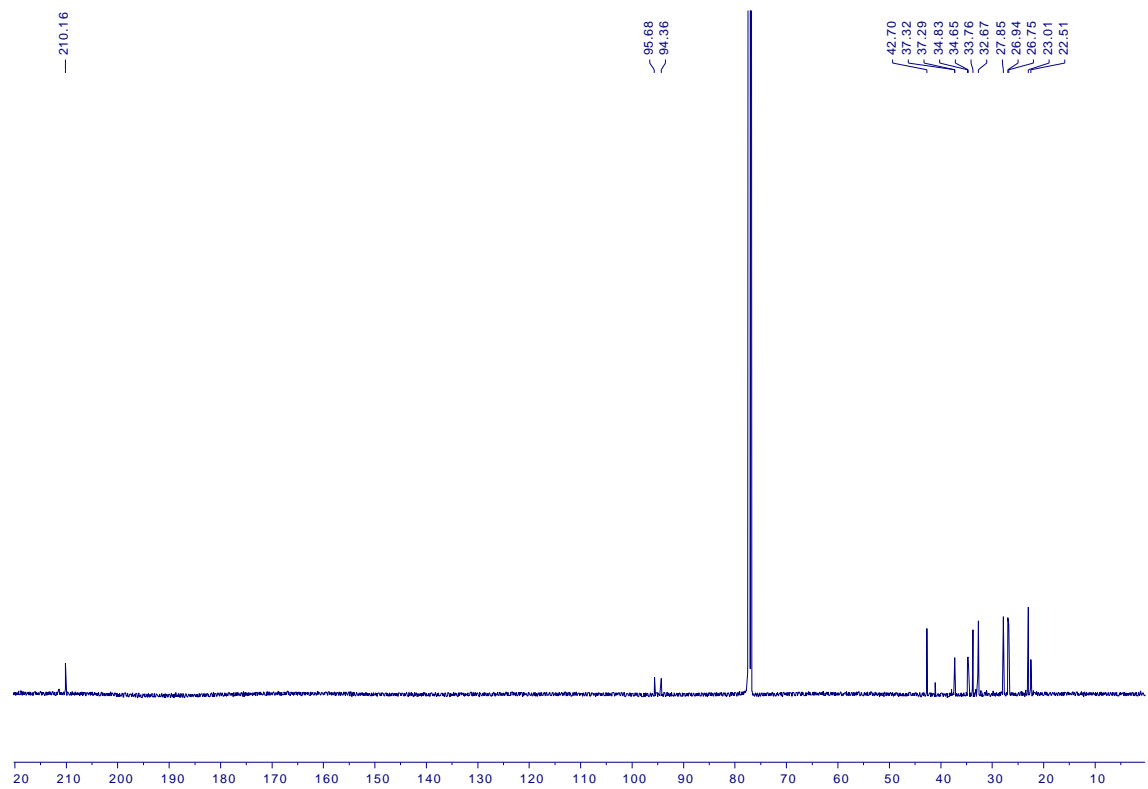

**8f**  $^{19}\text{F}$  NMR (376 MHz,  $\text{CDCl}_3$ )

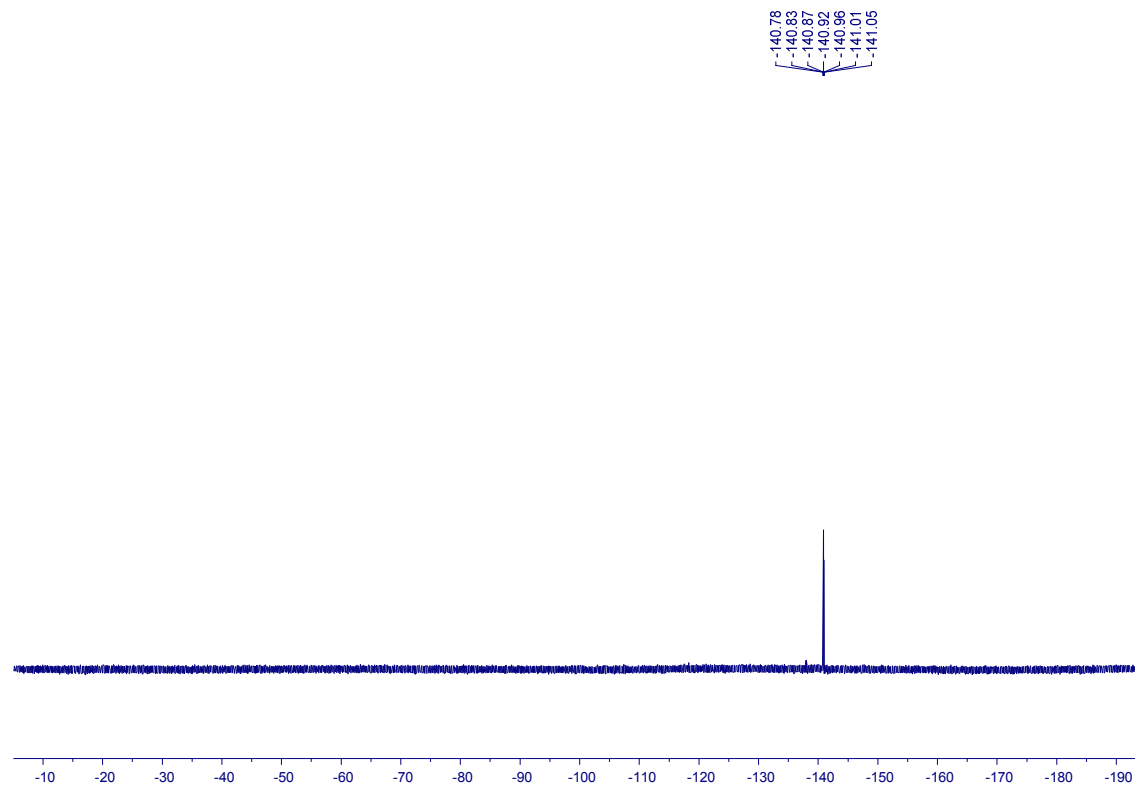

8g  $^1\text{H}$  NMR (400 MHz,  $\text{CDCl}_3$ )

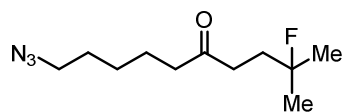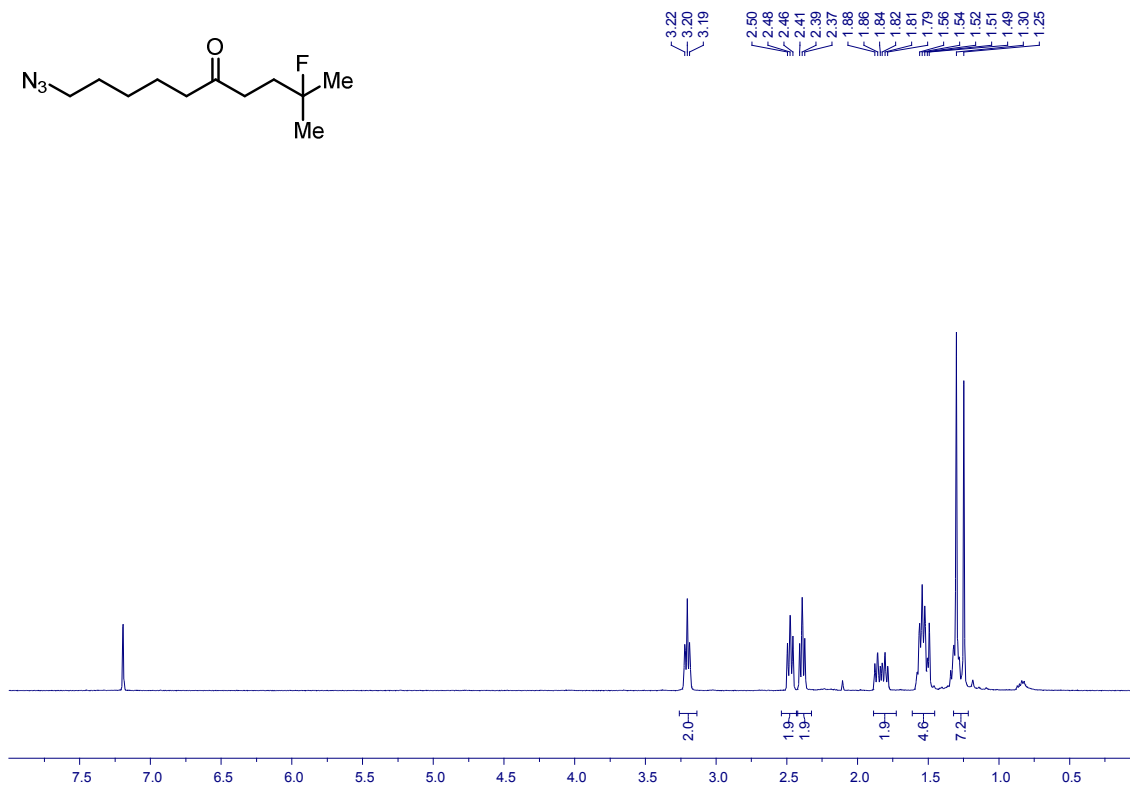

8g  $^{13}\text{C}$  NMR (126 MHz,  $\text{CDCl}_3$ )

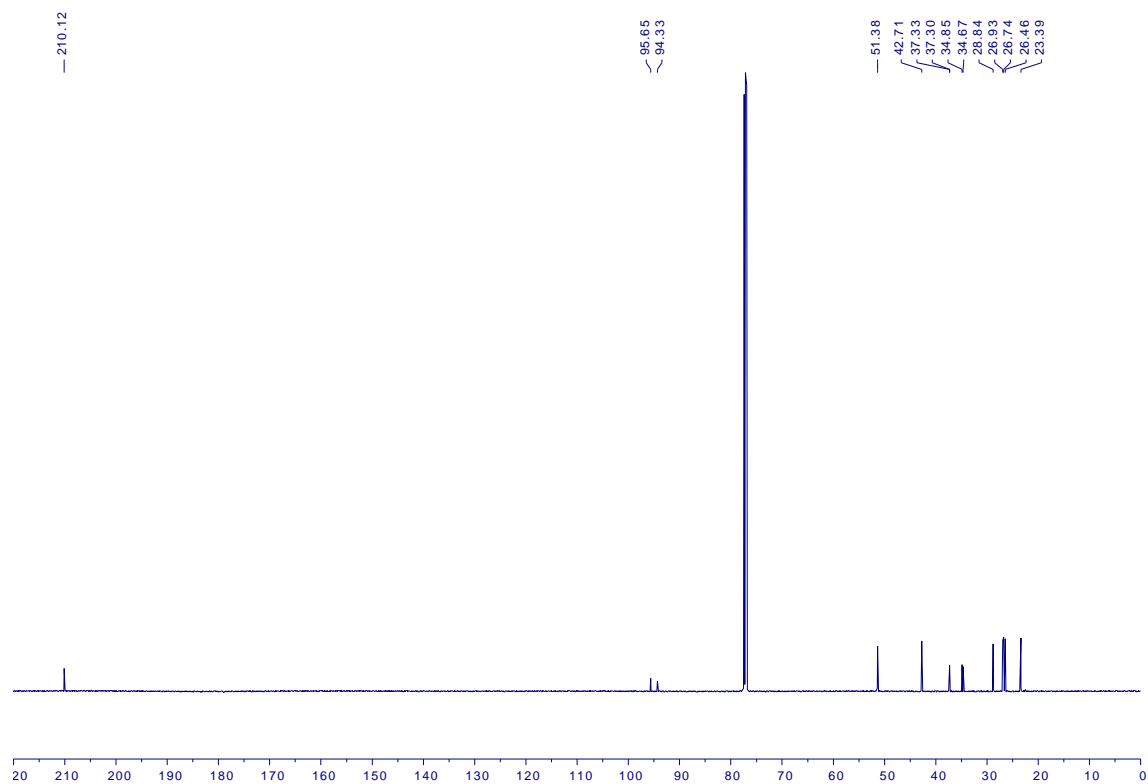

**8g**  $^{19}\text{F}$  NMR (376 MHz,  $\text{CDCl}_3$ )

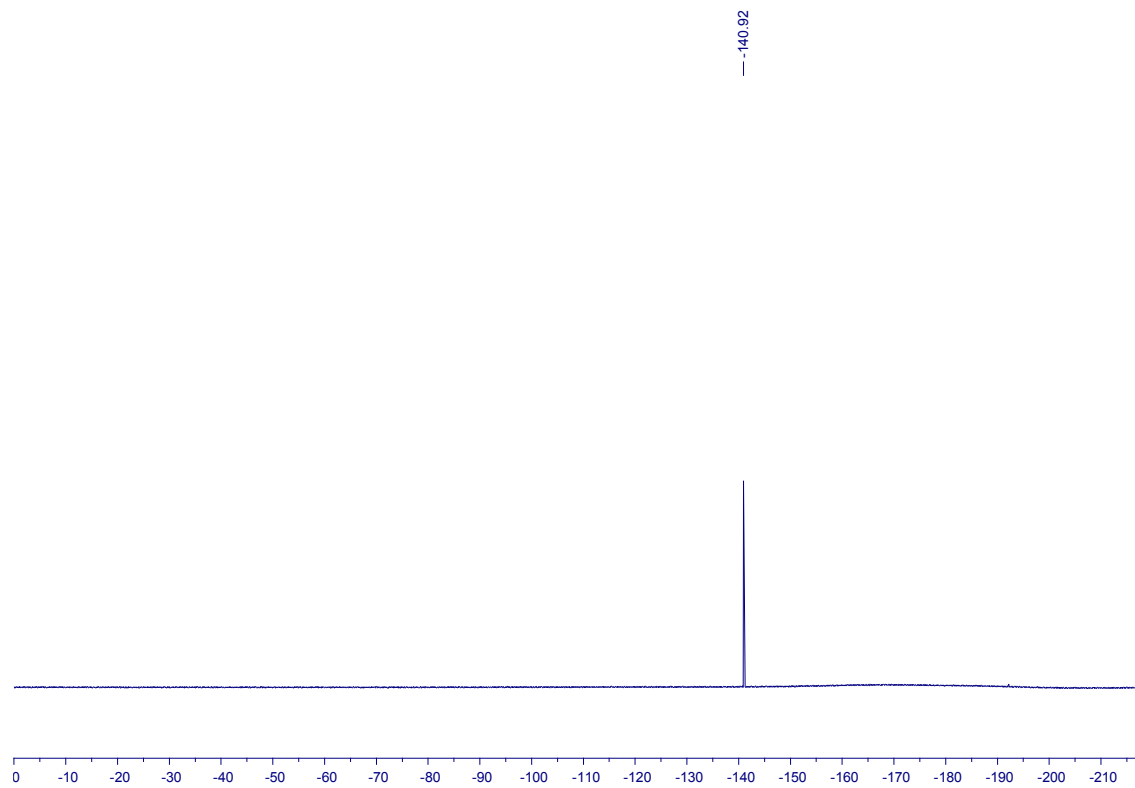

**8h**  $^1\text{H}$  NMR (500 MHz,  $\text{CDCl}_3$ )

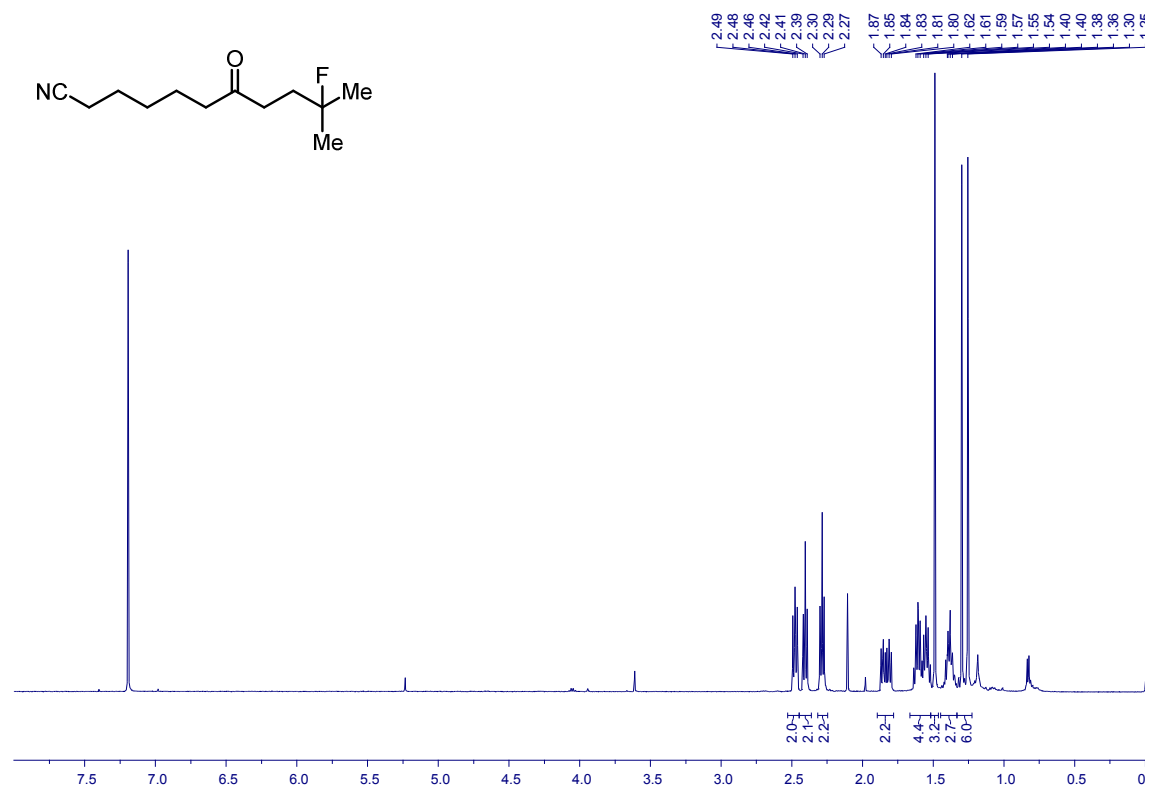

**8h**  $^{13}\text{C}$  NMR (126 MHz,  $\text{CDCl}_3$ )

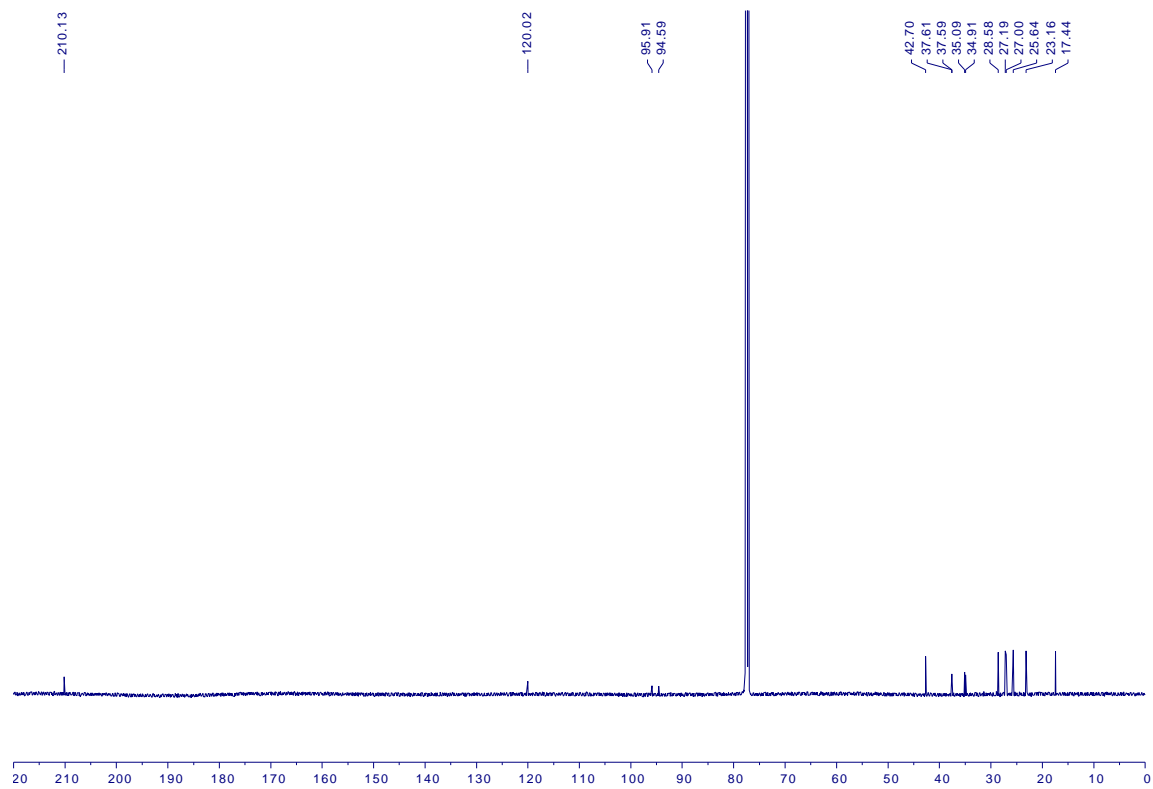

**8h**  $^{19}\text{F}$  NMR (376 MHz,  $\text{CDCl}_3$ )

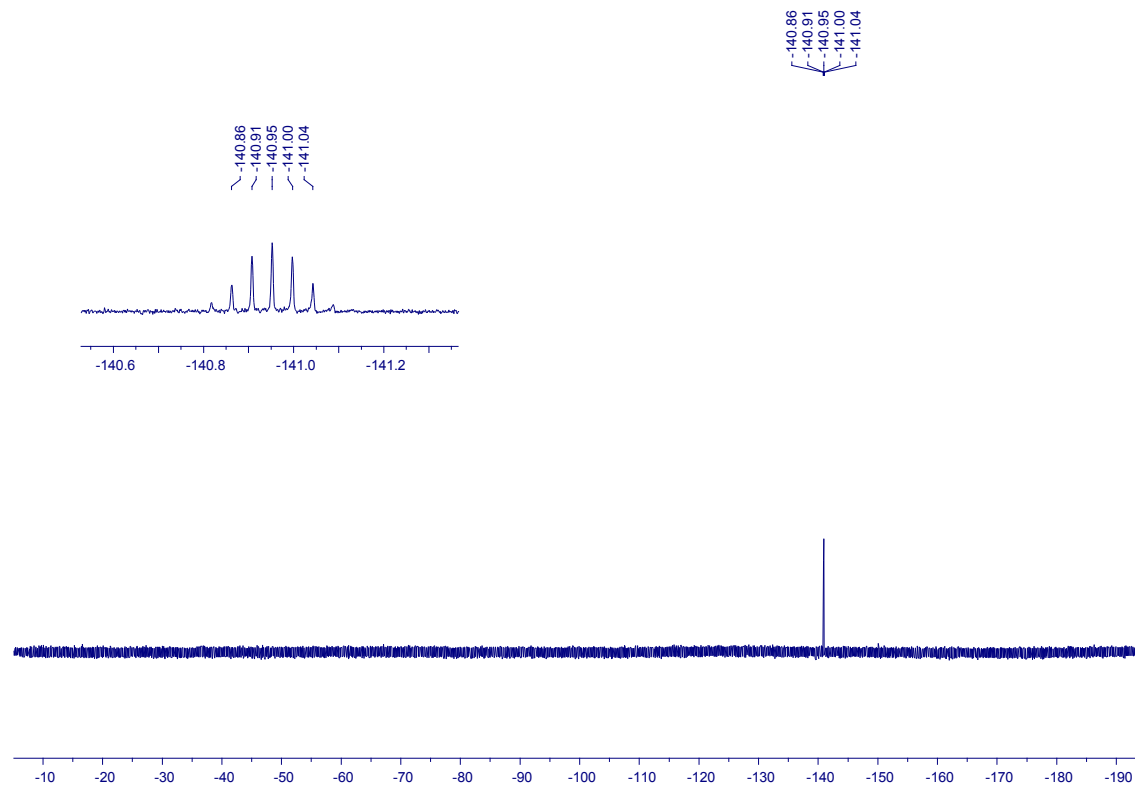

**8i**  $^1\text{H}$  NMR (500 MHz,  $\text{CDCl}_3$ )

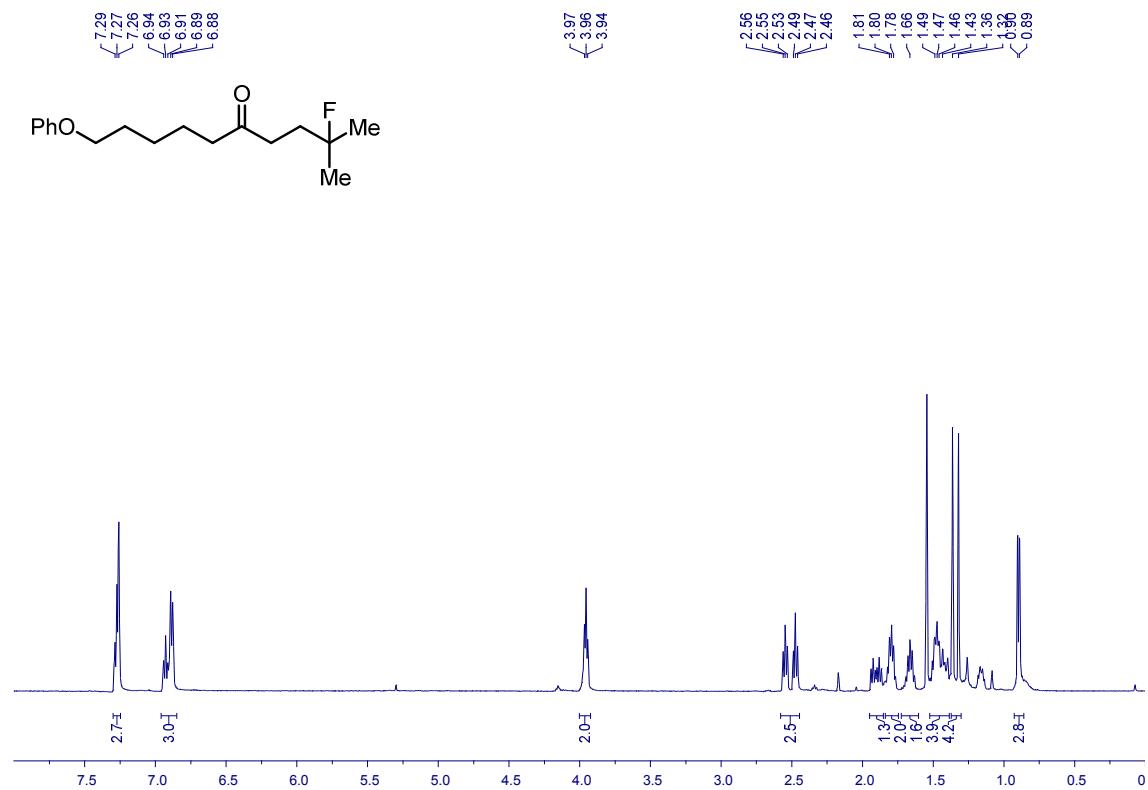

**8i**  $^{13}\text{C}$  NMR (126 MHz,  $\text{CDCl}_3$ )

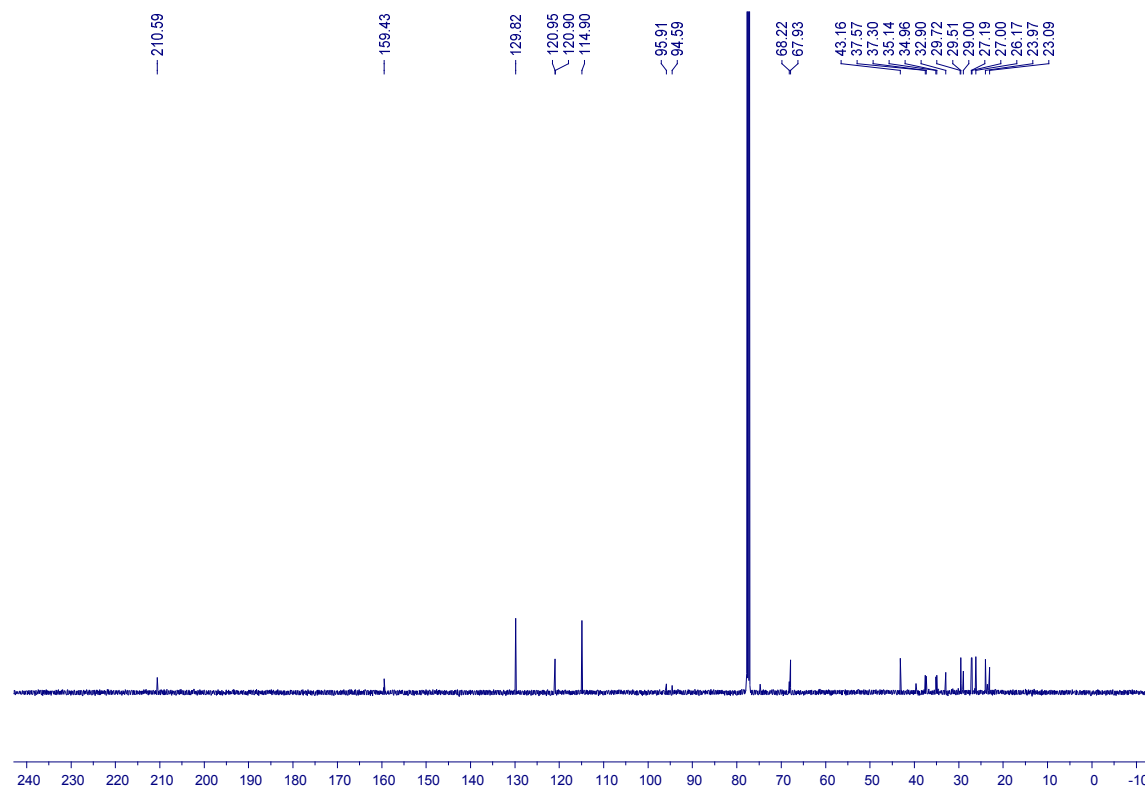



**8i**  $^{19}\text{F}$  NMR (471 MHz,  $\text{CDCl}_3$ )

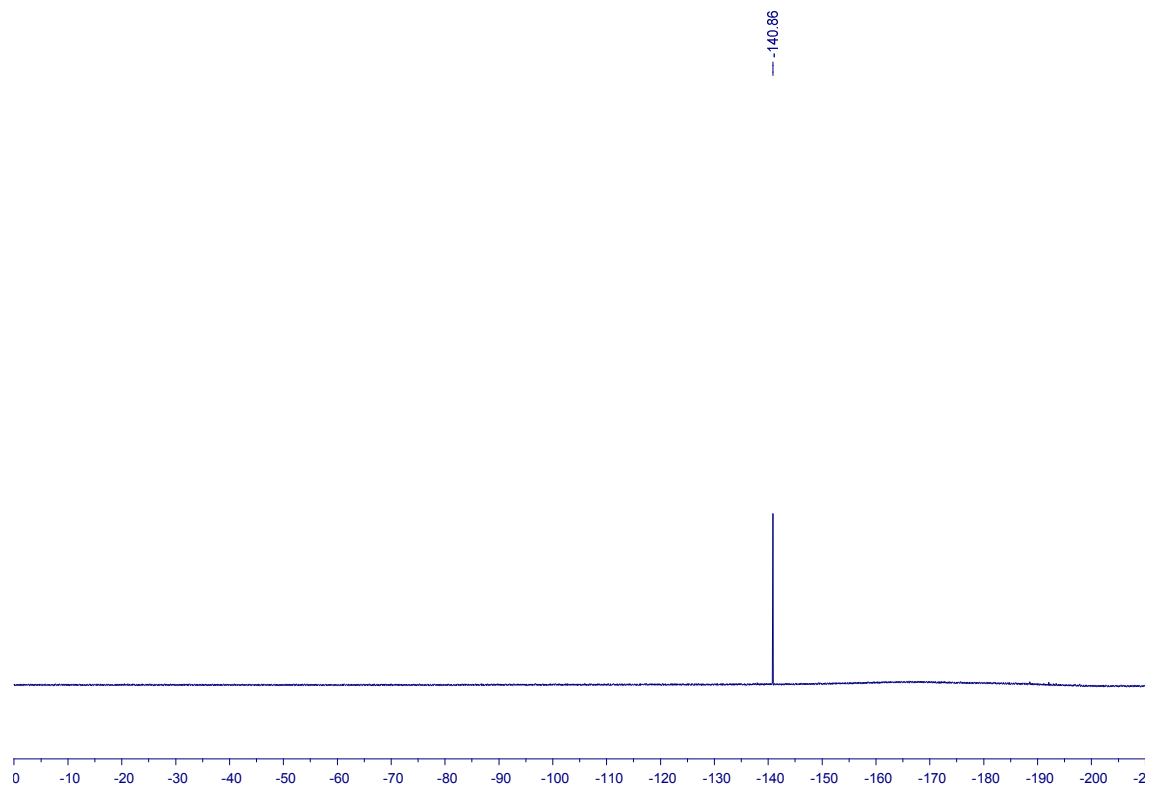

**8j**  $^1\text{H}$  NMR (500 MHz,  $\text{CDCl}_3$ )

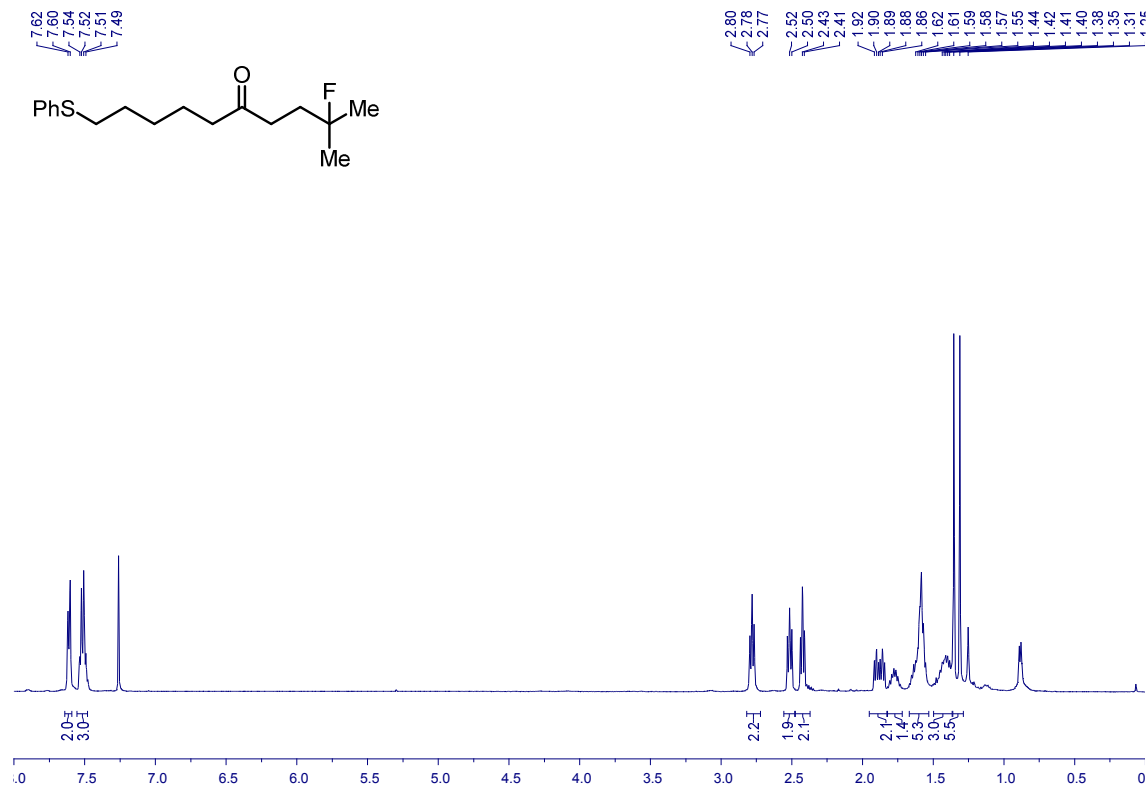

**8j**  $^{13}\text{C}$  NMR (126 MHz,  $\text{CDCl}_3$ )

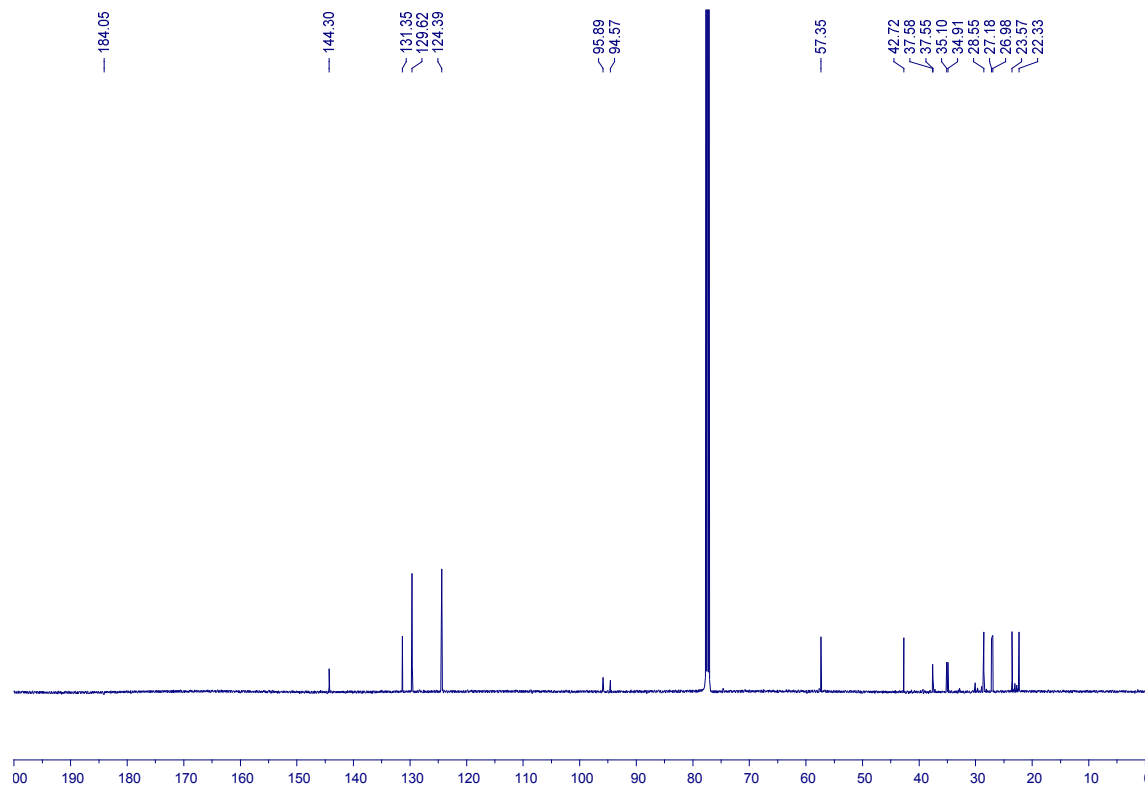

8j  $^{19}\text{F}$  NMR (471 MHz,  $\text{CDCl}_3$ )

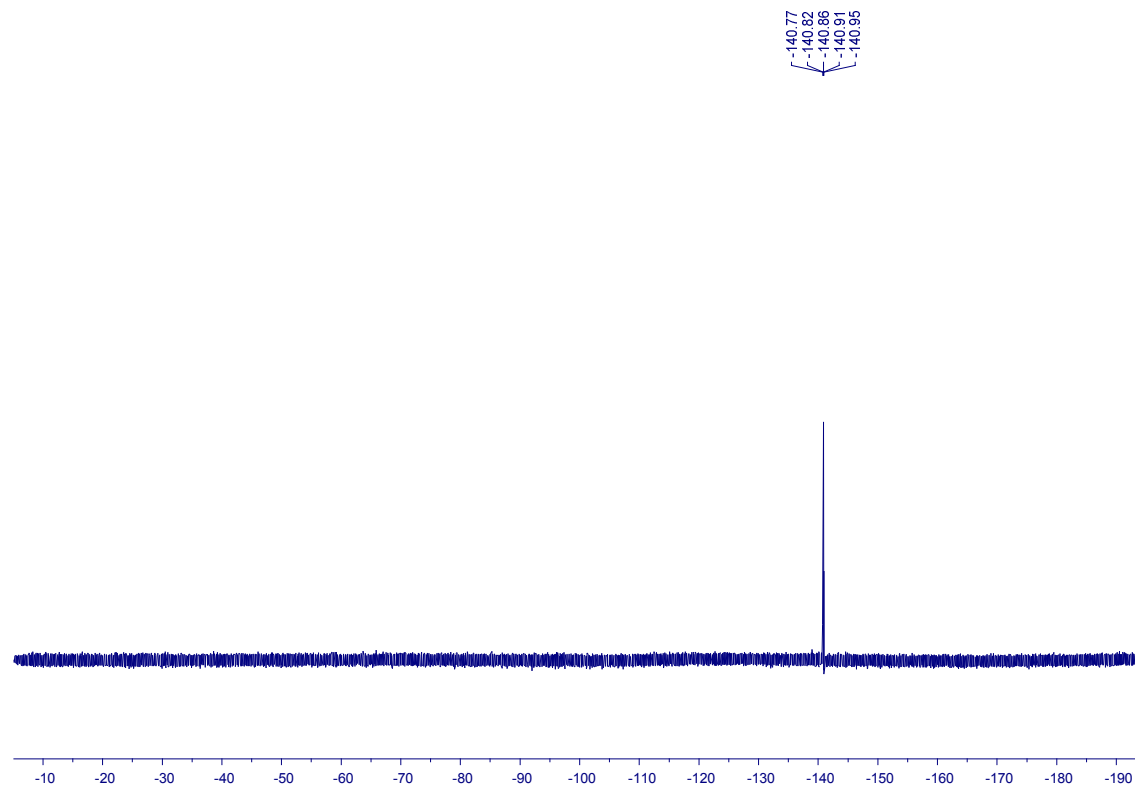

**8k**  $^1\text{H}$  NMR (500 MHz,  $\text{CDCl}_3$ )

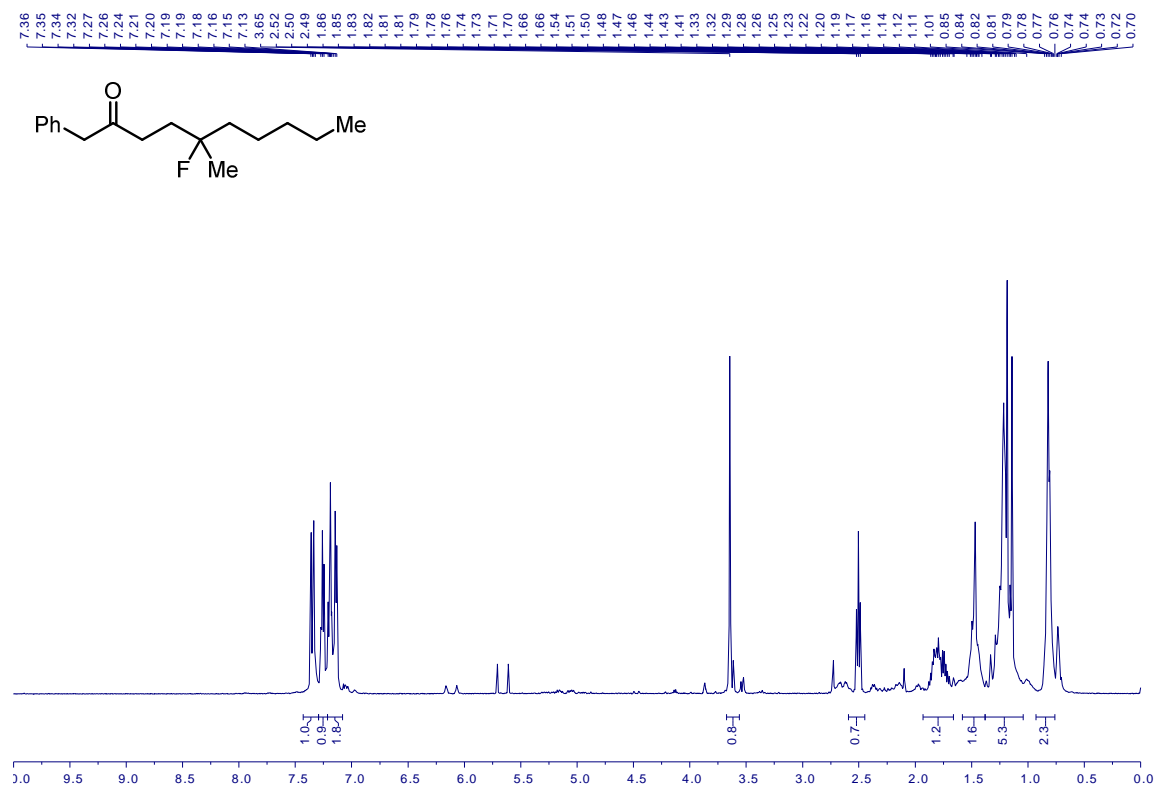

**8k**  $^{13}\text{C}$  NMR (126 MHz,  $\text{CDCl}_3$ )

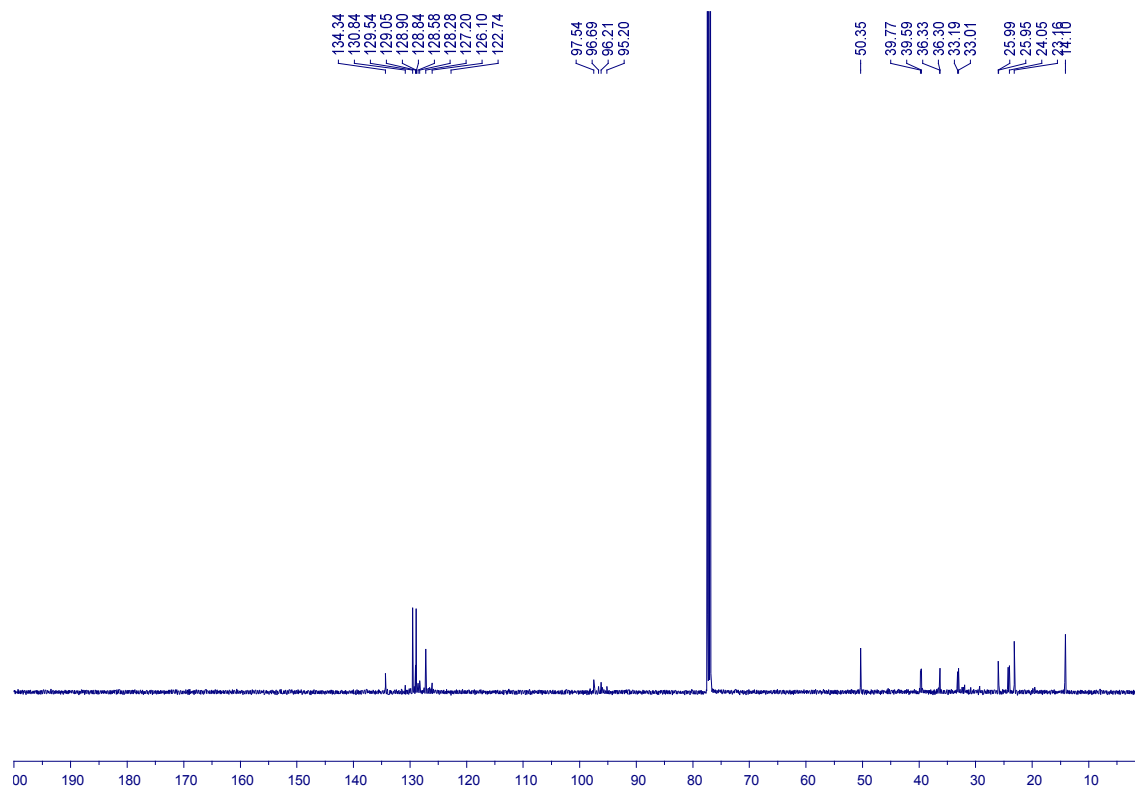

**8k**  $^{19}\text{F}$  NMR (376 MHz,  $\text{CDCl}_3$ )

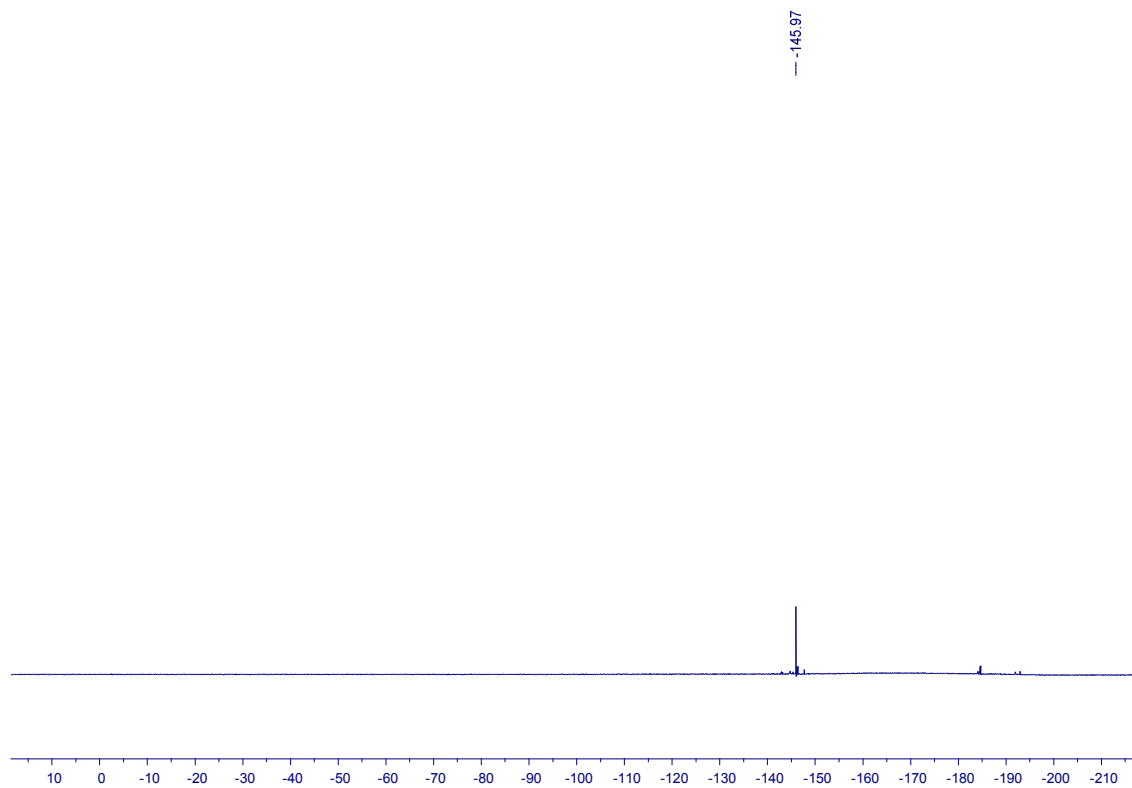

**81**  $^1\text{H}$  NMR (500 MHz,  $\text{CDCl}_3$ )

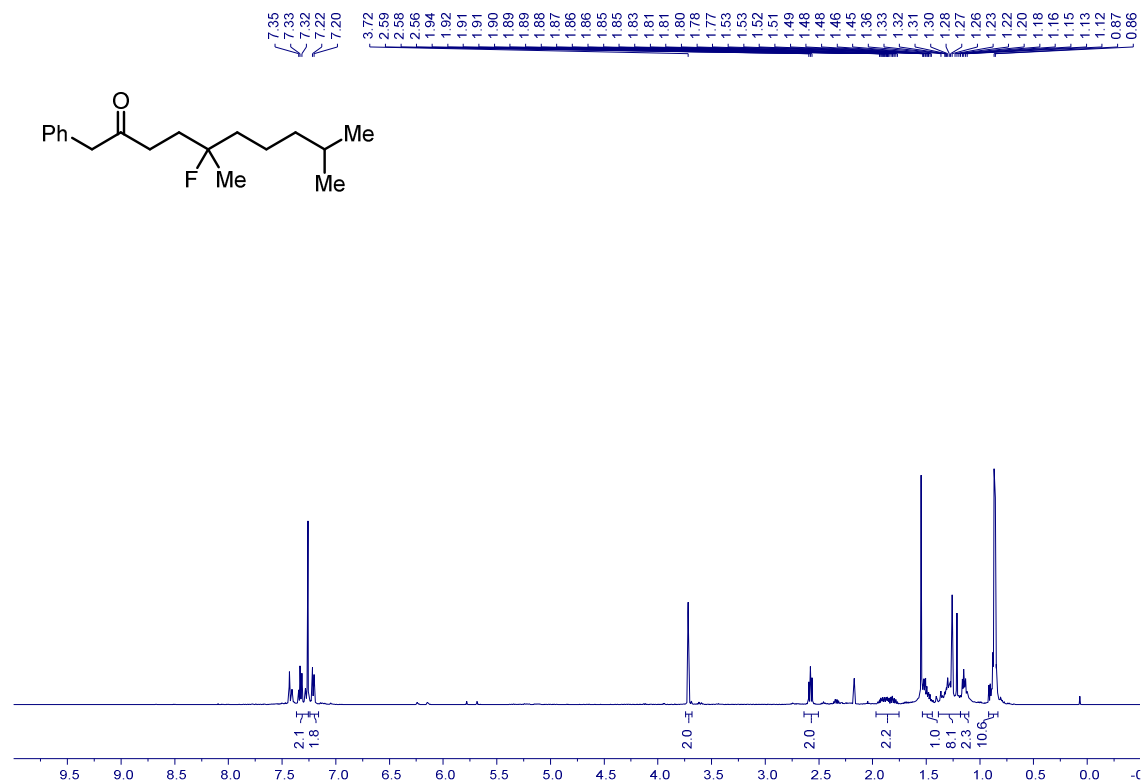

**81**  $^{13}\text{C}$  NMR (126 MHz,  $\text{CDCl}_3$ )

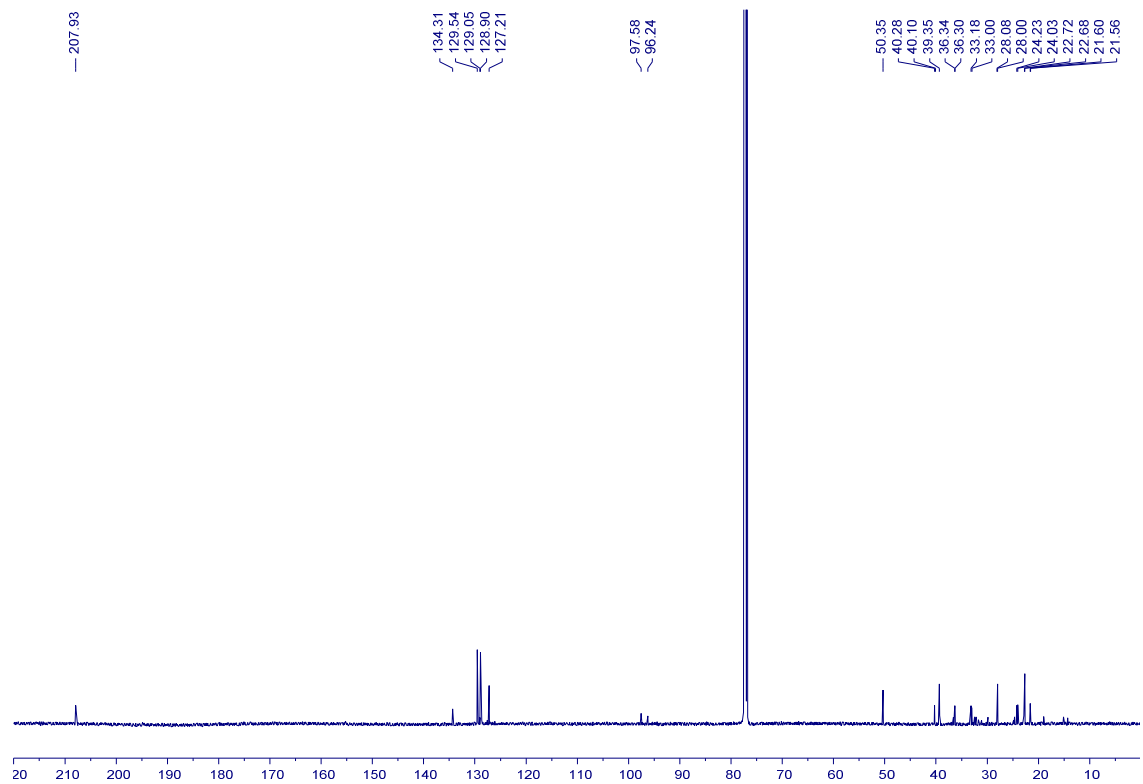

**81**  $^{19}\text{F}$  NMR (376 MHz,  $\text{CDCl}_3$ )

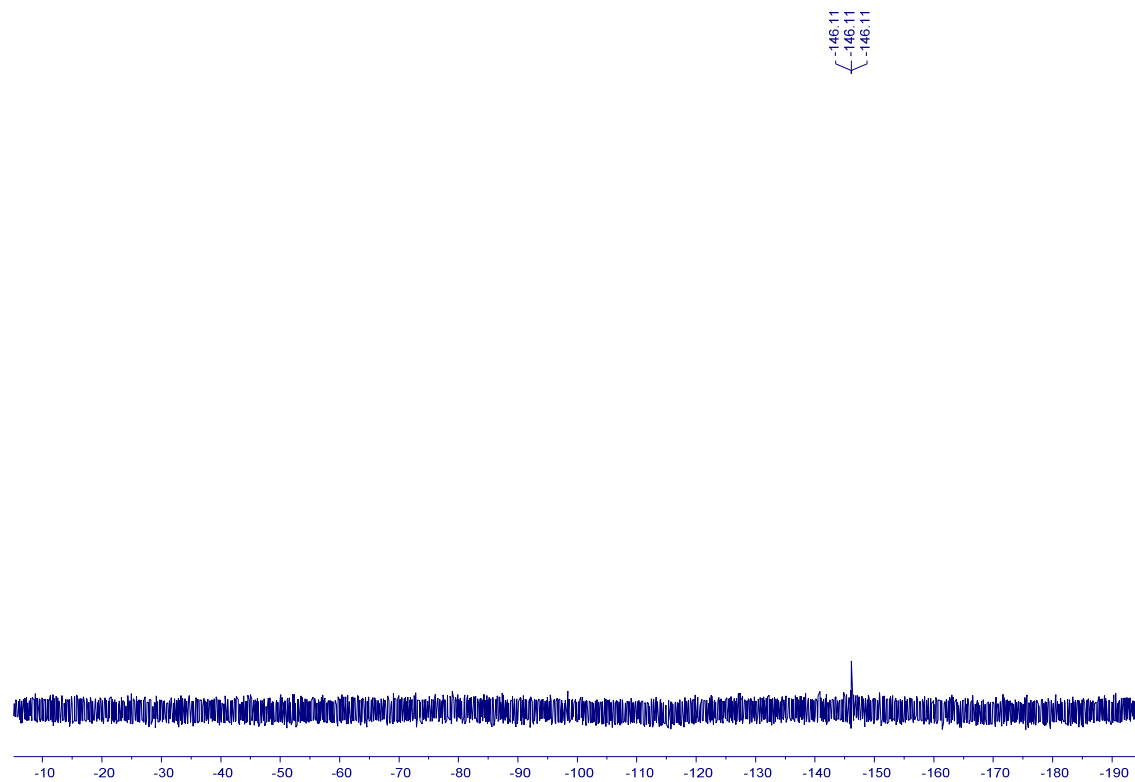

**8m**  $^1\text{H}$  NMR (500 MHz,  $\text{CDCl}_3$ )

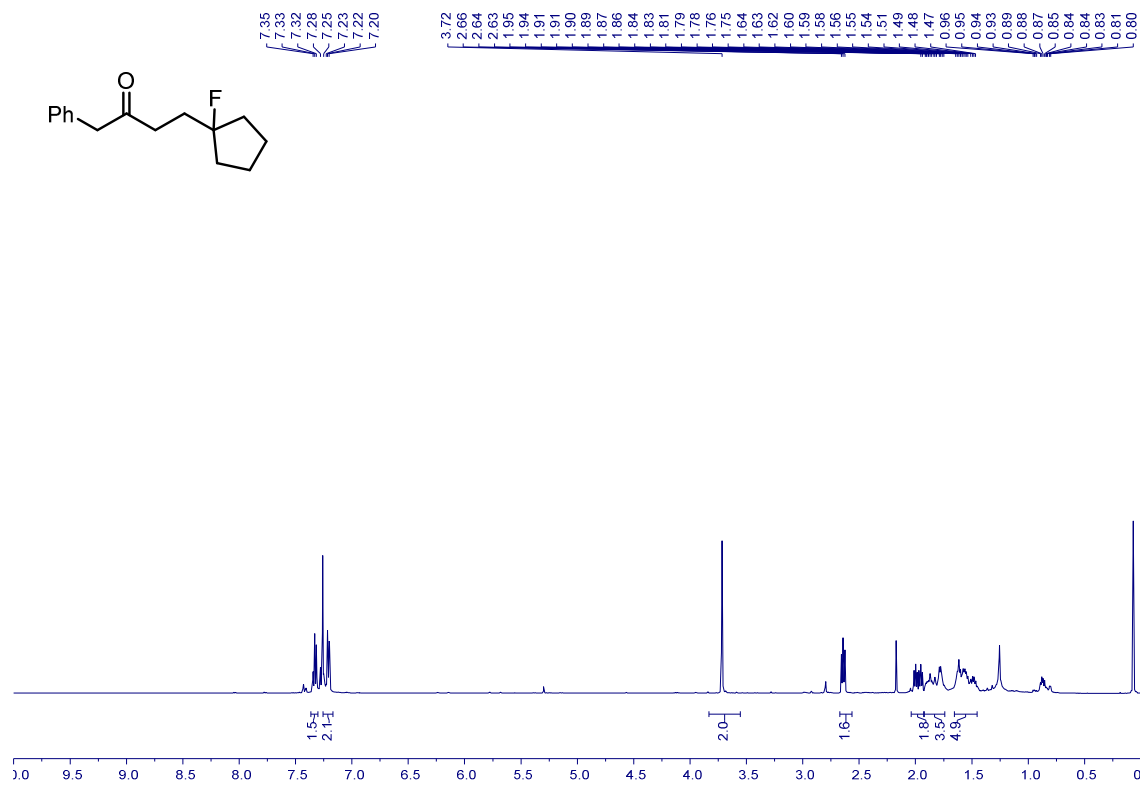

**8m**  $^{13}\text{C}$  NMR (126 MHz,  $\text{CDCl}_3$ )

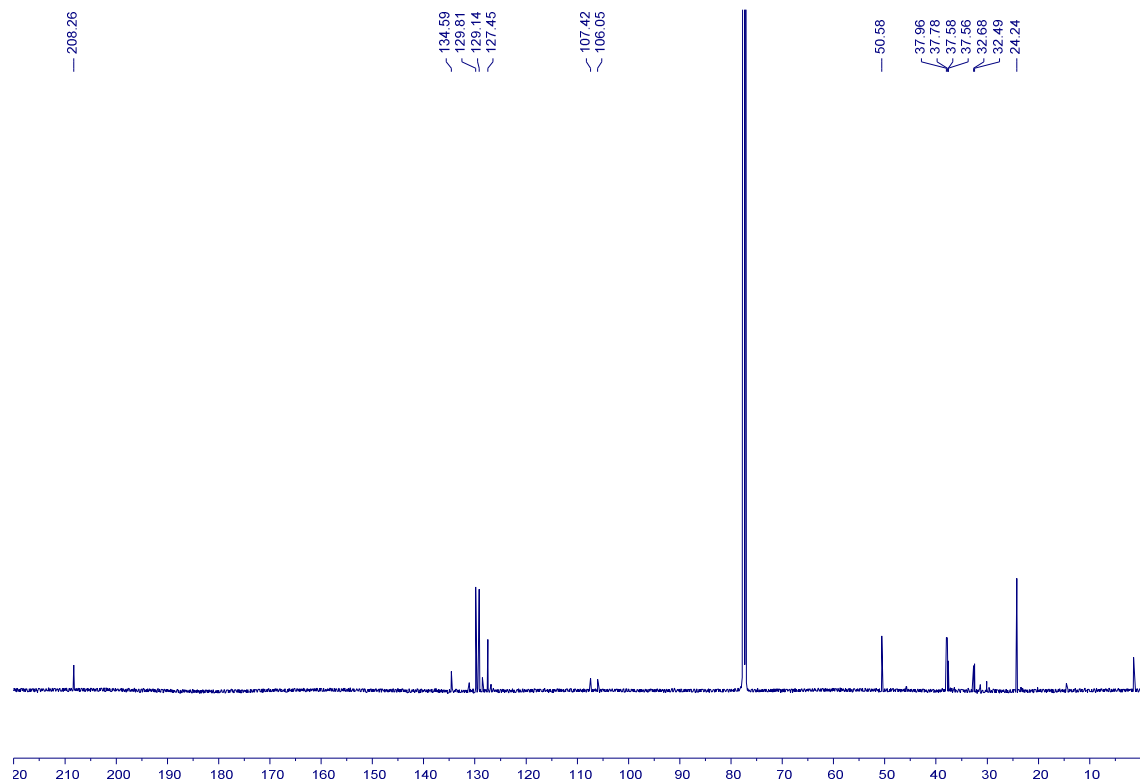



**8m**  $^{19}\text{F}$  NMR (376 MHz,  $\text{CDCl}_3$ )

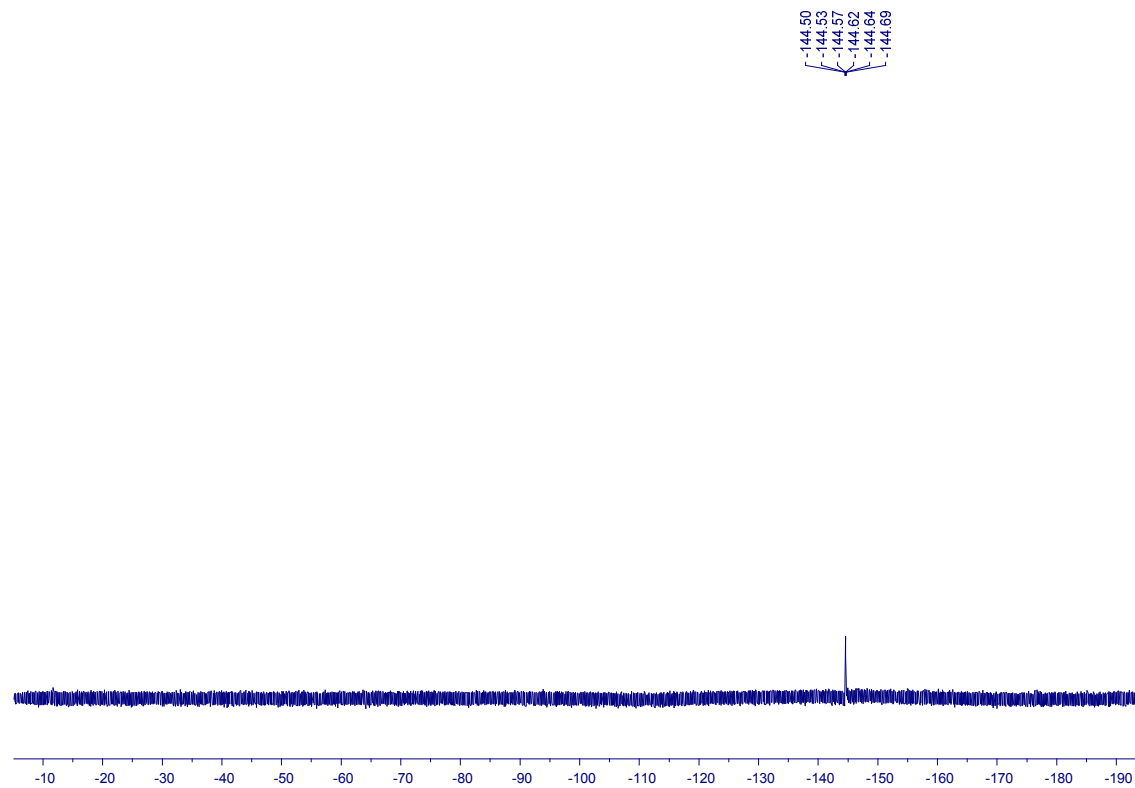

**8n**  $^1\text{H}$  NMR (500 MHz,  $\text{CDCl}_3$ )

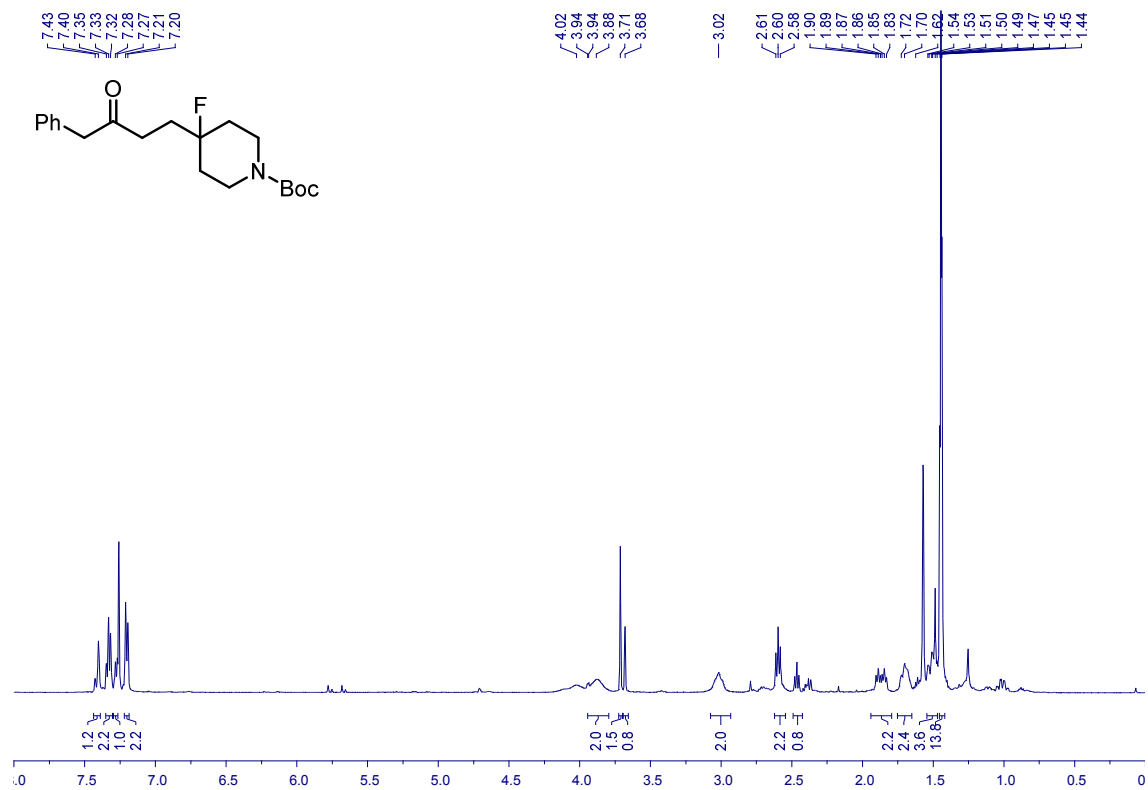

**8n**  $^{13}\text{C}$  NMR (126 MHz,  $\text{CDCl}_3$ )

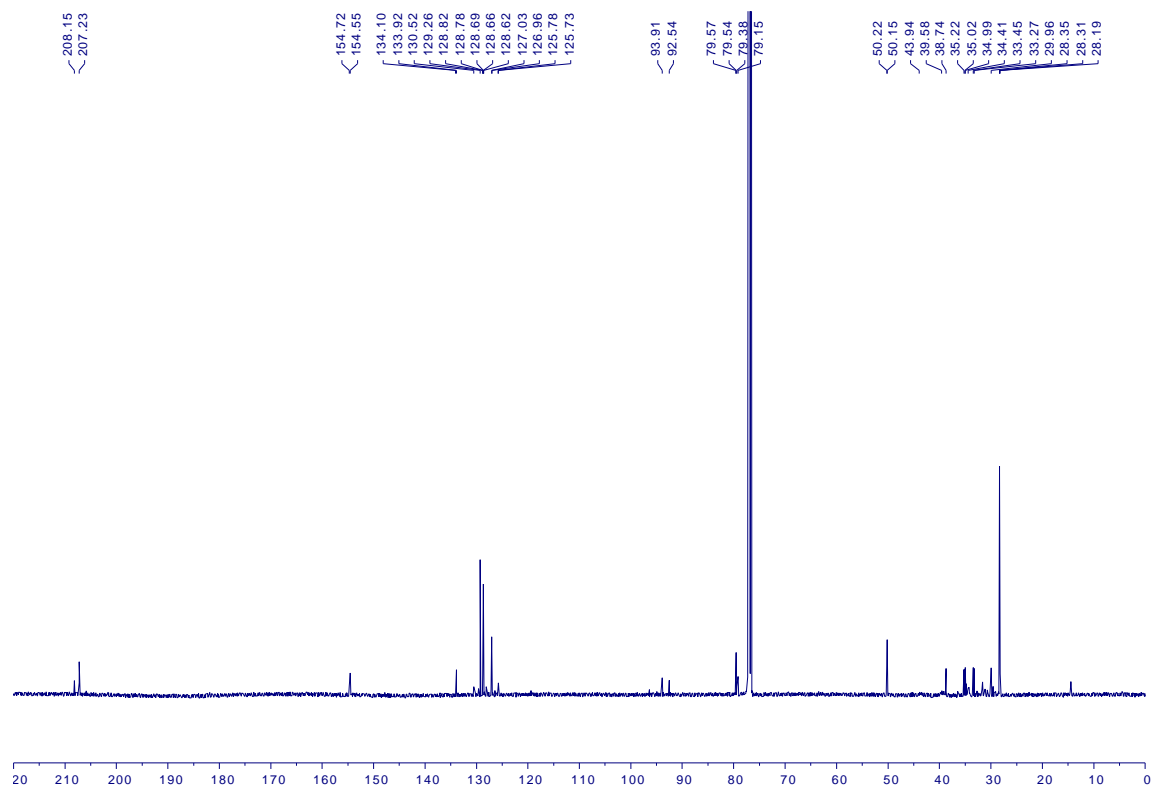

**8n**  $^{19}\text{F}$  NMR (376 MHz,  $\text{CDCl}_3$ )

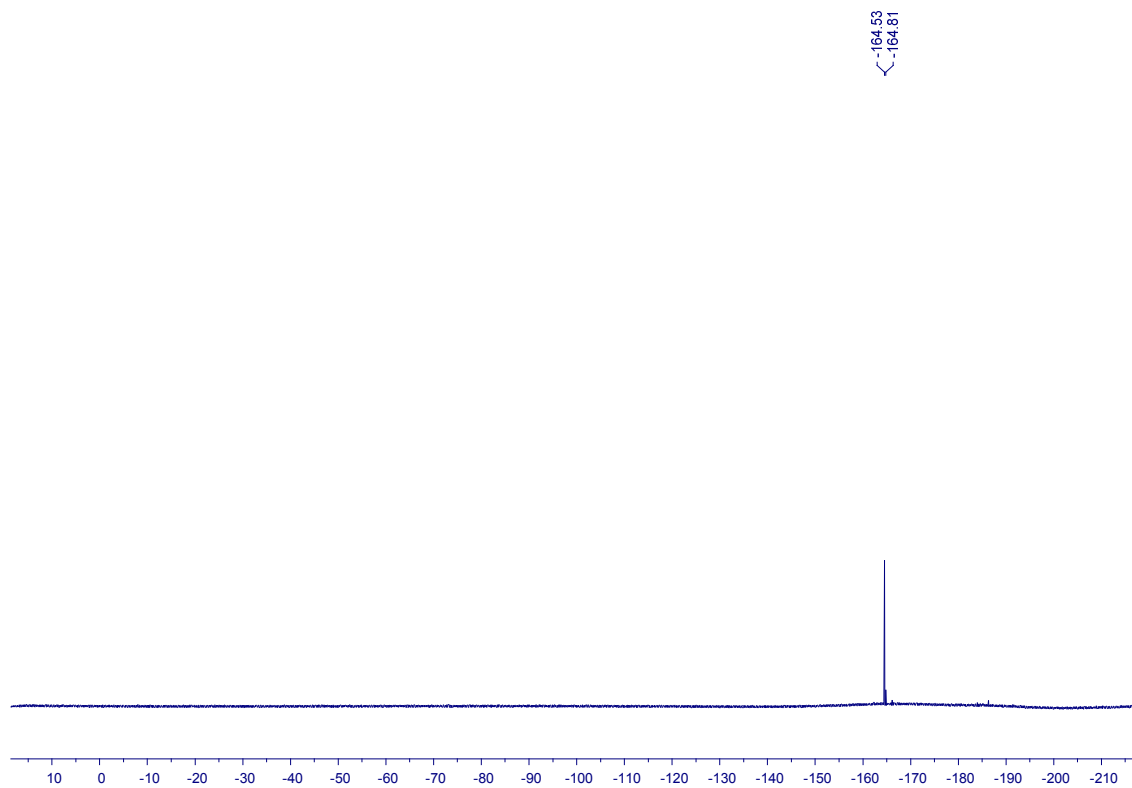

**8o**  $^1\text{H}$  NMR (500 MHz,  $\text{CDCl}_3$ )

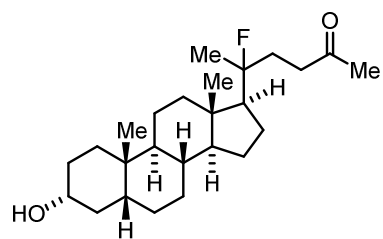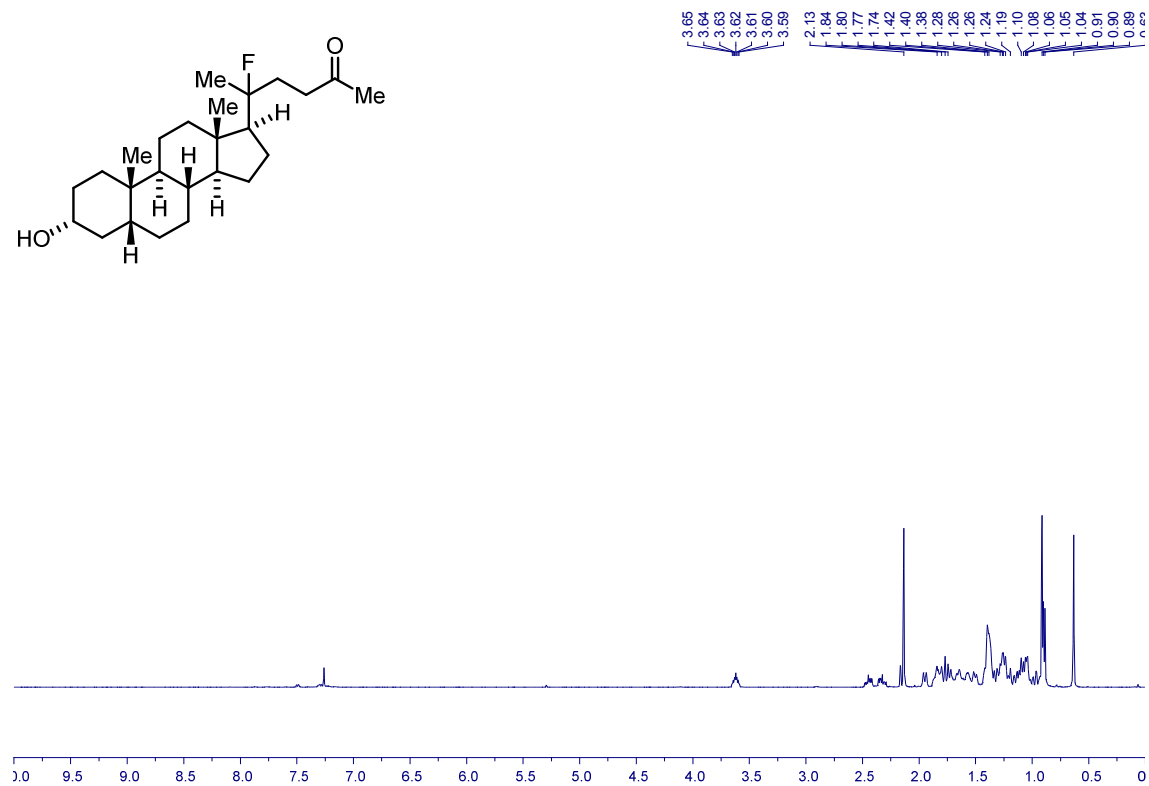

**8o**  $^{13}\text{C}$  NMR (126 MHz,  $\text{CDCl}_3$ )

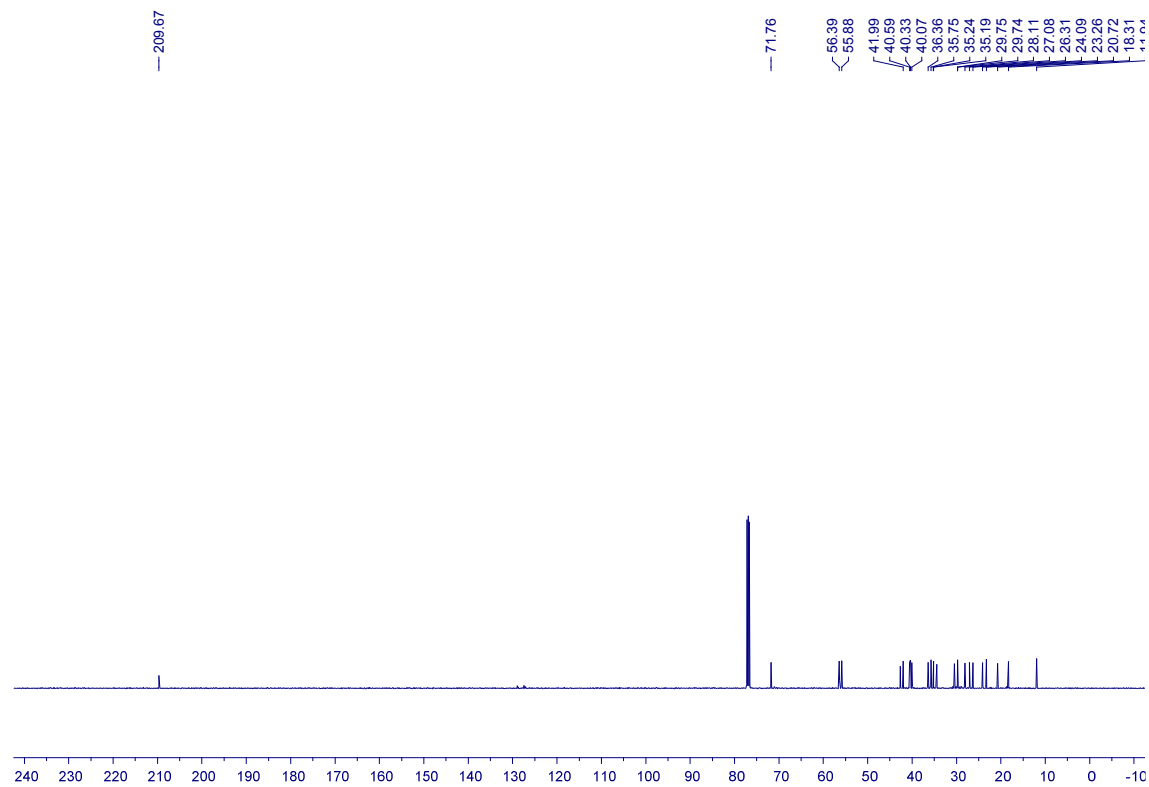

8o  $^{19}\text{F}$  NMR (376 MHz,  $\text{CDCl}_3$ )

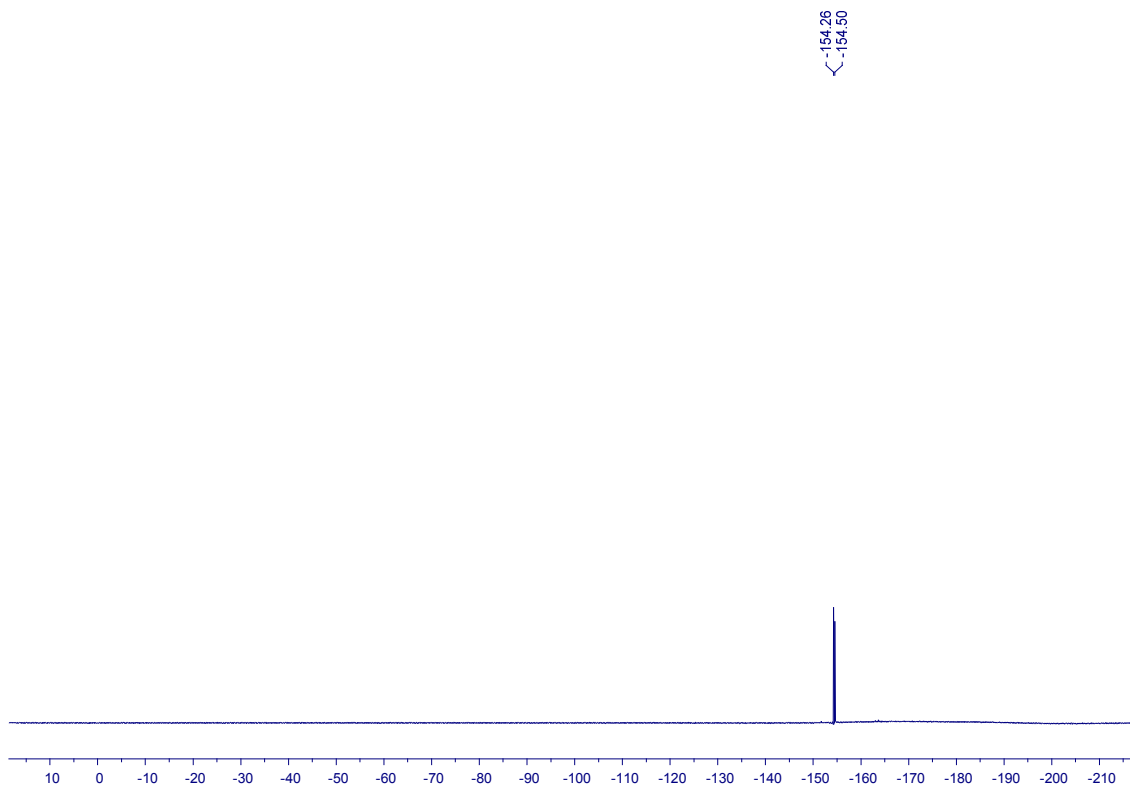

## 9 References

- [1] J. Boivin, E. Fouquet, S. Z. Zard, *Tetrahedron* **1994**, *50*, 1757.
- [2] P. Beak, S. T. Kerrick, D. J. Gallagher, *J. Am. Chem. Soc.* **1993**, *115*, 10628.
- [3] M. Mousseron, *Bull. Soc. Chim. Fr.* **1957**, 346.
- [4] V. Koch, M. Nieger, S. Brase, *Adv. Synth. Catal.* **2017**, *359*, 832.
- [5] O. E. Hutt, T. L. Doan, G. I. Georg, *Org. Lett.* **2013**, *15*, 1602.
- [6] Y.-F. Liang, X.-F. Zhou, S.-Y. Tang, Y.-B. Huang, Y.-S. Feng, H.-J. Xu, *RSC Adv.* **2013**, *3*, 7739.
- [7] S. R. Stauffer, C. J. Coletta, R. Tedesco, G. Nishiguchi, K. Carlson, J. Sun, B. S. Katzenellenbogen, J. A. Katzenellenbogen, *J. Med. Chem.* **2000**, *43*, 4934.
- [8] P. J. Wagner, E. J. Siebert, *J. Am. Chem. Soc.* **1981**, *103*, 7329.
- [9] F. B. Stocker, M. W. Fordice, J. K. Larson, J. H. Thorstenson, *J. Org. Chem.* **1966**, *31*, 2380.
- [10] Q. Dang, Y. Liu, D. K. Cashion, S. R. Kasibhatla, T. Jiang, F. Taplin, J. D. Jacintho, H. Li, Z. Sun, Y. Fan, J. DaRe, F. Tian, W. Li, T. Gibson, R. Lemus, P. D. v. Poelje, S. C. Potter, M. D. Erion, *J. Med. Chem.* **2011**, *54*, 153.
- [11] H. C. Brown, M. M. Rogic, H. Nambu, M. W. Rathke, *J. Am. Chem. Soc.* **1969**, *91*, 2147.
- [12] E. Larionov, L. Lin, L. Guénée, C. Mazet, *J. Am. Chem. Soc.* **2014**, *136*, 16882.
- [13] M. Dukh, P. Drasar, I. Cerny, V. Pouzar, J. A. Shriver, V. Kral, J. Sessler, *Supramol. Chem.* **2010**, *14*, 237.
- [14] A. Martin-Mingot, G. Compain, F. Liu, M.-P. Jouannetaud, C. Bachmann, G. Frapper, S. Thibaudeau, *J. Fluorine Chem.* **2012**, *134*, 56.
- [15] X. Huang, W. Liu, J. M. Hooker, J. T. Groves, *Angew. Chem. Int. Ed.* **2015**, *54*, 5241.
- [16] Y. Amaoka, M. Nagatomo, M. Inoue, *Org. Lett.* **2013**, *15*, 2160.
- [17] M. Kirihara, K. Niimi, M. Okumura, T. Momose, *Chem. Pharm. Bull.* **2000**, *48*, 220.
- [18] X. Zhang, S. Guo, P. Tang, *Org. Chem. Front.* **2015**, *2*, 806.
- [19] M. A. Cismenia, T. P. Yoon, *Chem. Sci.* **2015**, *6*, 5426.
- [20] M. Rueda-Becerril, O. Mahé, M. Drouin, M. B. Majewski, J. G. West, M. O. Wolf, G. M. Sammis, J.-F. Paquin, *J. Am. Chem. Soc.* **2014**, *136*, 2637.
- [21] (a) H. Zhao, X. Fan, J. Yu, C. Zhu, *J. Am. Chem. Soc.* **2015**, *137*, 3490; (b) Y.-Y. Liu, J. Yang, R.-J. Song, J.-H. Li, *Adv. Synth. Catal.* **2014**, *356*, 2913; (c) Z. Li, L. Song, C. Li, *J. Am. Chem. Soc.* **2013**, *135*, 4640; (d) F. Yin, Z. Wang, Z. Li, C. Li, *J. Am. Chem. Soc.* **2012**, *134*, 10401.
- [22] T. Xu, X. Mu, H. Peng, G. Liu, *Angew. Chem. Int. Ed.* **2011**, *50*, 8176.
- [23] R. G. Parr, W. Yang, *Density-Functional Theory of Atoms and Molecules* **1989**, Oxford University Press, Oxford U.K.
- [24] M. J. Frisch, G. W. Trucks, H. B. Schlegel, G. E. Scuseria, M. A. Robb, J. R. Cheeseman, G. Scalmani, V. Barone, B. Mennucci, G. A. Petersson, H. Nakatsuji, M. Caricato, X. Li, H. P. Hratchian, A. F. Izmaylov, J. Bloino, G. Zheng, J. L. Sonnenberg, M. Hada, M. Ehara, K. Toyota, R. Fukuda, J. Hasegawa, M. Ishida, T. Nakajima, Y. Honda, O. Kitao, H. Nakai, T. Vreven, J. A. M. Jr., J. E. Peralta, F. Ogliaro, M. Bearpark, J. J. Heyd, E. Brothers, K. N. Kudin, V. N. Staroverov, T. Keith, R. Kobayashi, J. Normand, K. Raghavachari, A. Rendell, J. C. Burant, S. S. Iyengar, J. Tomasi, M. Cossi, N. Rega, J. M. Millam, M. Klene, J. E. Knox, J. B. Cross, V. Bakken, C. Adamo, J. Jaramillo, R. Gomperts, R. E. Stratmann, O. Yazyev, A. J. Austin, R. Cammi, C. Pomelli, J. W. Ochterski, R. L. Martin, K. Morokuma, V. G. Zakrzewski, G. A. Voth, P. Salvador, J. J. Dannenberg, S. Dapprich, A. D. Daniels, O. Farkas, J. B. Foresman, J. V. Ortiz, J. Cioslowski, D. J. Fox, *Gaussian 09* **2013**, revision D.01; Gaussian, Inc.

- [25] R. Dennington, T. Keith, J. Millam, *GaussView* **2009**, version 5; Semichem Inc.: Shawnee Mission, KS, 2009.
- [26] (a) P. J. Stephens, F. J. Devlin, C. F. Chabalowski, M. J. Frisch, *J. Chem. Phys.* **1994**, *98*, 11623; (b) A. D. Becke, *J. Chem. Phys.* **1993**, *98*, 1372; (c) A. D. Becke, *J. Phys. Chem.* **1993**, *98*, 5648; (d) C. Lee, W. Yang, R. G. Parr, *Phys. Rev. B* **1988**, *37*, 785.
- [27] T. D. Svejstrup, W. Zawodny, J. J. Douglas, D. Bidgeli, N. S. Sheikh, D. Leonori, *Chem. Commun.* **2016**, *52*, 12302.
- [28] (a) C. Gonzalez, H. B. Schlegel, *J. Phys. Chem.* **1990**, *94*, 5523; (b) C. Gonzalez, H. B. Schlegel, *J. Phys. Chem.* **1989**, *90*, 2154; (c) K. Fukui, *Acc. Chem. Res.* **1981**, *14*, 363.
- [29] J. Liu, S. Niwayame, Y. You, K. N. Houk, *J. Org. Chem.* **1998**, *63*, 1064.
- [30] (a) G. A. DiLabio, D. A. Pratt, *J. Phys. Chem. A* **2000**, *104*, 1938; (b) G. A. DiLabio, A. D. LoFaro, J. S. Wright, *J. Phys. Chem. A* **1999**, *103*, 1653; (c) A. P. Scot, L. Random, *J. Phys. Chem.* **1996**, *100*, 16502.
